# Supplementary material for: Genome-scale CRISPR screening for modifiers of cellular LDL uptake
Source: PLOS journal article supplement (doi:10.1371/journal.pgen.1009285), 2021-01-29
Supplement: S8 (10.1371/journal.pgen.1009285.s008) [file journal.pgen.1009285.s008.xlsx]

## Sheet: annotation
Primary screen of LDL uptake in HuH7 cells cultured under lipoprotein-rich or lipoprotein-depleted conditions
Output files from MAGeCK analysis
control = LDLlow sorted cells
treatment = LDLhigh sorted cells
Gene-level analysis
id	gene ID
num	number of individual gRNAs detected for a given gene
neg|score	MAGeCK significance score for depletion in LDLhigh cells (low score indicates gene disruption reduces LDL uptake)
neg|p-value	p-value for depletion in LDLhigh cells (gene disruption reduces LDL uptake)
neg|fdr	FDR for depletion in LDLhigh cells (gene disruption reduces LDL uptake)
neg|rank	gene rank for depletion in LDLhigh cells (gene disruption reduces LDL uptake)
neg|goodsgrna	number of gene-targeting gRNA with significant depletion in LDLhigh cells (gene disruption reduces LDL uptake)
neg|lfc	composite log2 fold change of gene-targeting gRNA (negative value indicates gene disruption reduces LDL uptake)
pos|score	MAGeCK significance score for enrichment in LDLhigh cells (low score indicates gene disruption increases LDL uptake)
pos|p-value	p-value for enrichment in LDLhigh cells (gene disruption increases LDL uptake)
pos|fdr	FDR for enrichment in LDLhigh cells (gene disruption increases LDL uptake)
pos|rank	gene rank for enrichment in LDLhigh cells (gene disruption increases LDL uptake)
pos|goodsgrna	number of gene-targeting gRNA with significant enrichment in LDLhigh cells (gene disruption increases LDL uptake)
pos|lfc	composite log2 fold change of gene-targeting gRNA (positive value indicates gene disruption increases LDL uptake)
gRNA-level analysis
sgrna	GeCKO library gRNA identifier
gene	targeted gene
control_count	individual replicate normalized read counts in LDLlow cells
treatment_count	individual replicate normalized read counts in LDLhigh cells
control_mean	mean normalized read counts in LDLlow cells
treat_mean	mean normalized read counts in LDLhigh cells
LFC	log2 fold change of normalized read counts in LDLhigh relative to LDLlow cells
control_var	raw variance in LDLlow cells
adj_var	adjusted variance in LDLlow cells
score	MAGeCK significance score for individual gRNA
p.low	p-value for depletion in LDLhigh cells (gene disruption reduces LDL uptake)
p.high	p-value for enrichment in LDLhigh cells (gene disruption increases LDL uptake)
p.twosided	minimum p-value for either enrichment or depletion
FDR	FDR for p.twosided
high_in_treatment	whether normalized read counts for gRNA are higher in LDLhigh than LDLlow cells (gene disruption increases LDL uptake)

## Sheet: LP-rich_gene
id	num	neg|score	neg|p-value	neg|fdr	neg|rank	neg|goodsgrna	neg|lfc	pos|score	pos|p-value	pos|fdr	pos|rank	pos|goodsgrna	pos|lfc
GAGE1	6	3.26e-15	2.29e-07	0.000413	1	6	-1.0861	1	1	1	21660	0	-1.0861
EXOC7	6	1.77e-10	2.29e-07	0.000413	2	6	-1.7348	1	1	1	21661	0	-1.7348
SCAP	6	2.3e-10	2.29e-07	0.000413	3	6	-2.9147	1	1	1	21659	0	-2.9147
COMMD3	6	2.71e-10	2.29e-07	0.000413	4	6	-1.9074	0.99998	0.99999	1	21654	0	-1.9074
EXOC8	6	8.99e-10	2.29e-07	0.000413	5	6	-1.6951	1	1	1	21663	0	-1.6951
LDLR	6	3.55e-09	2.29e-07	0.000413	6	5	-2.0837	0.50074	0.56491	1	12195	1	-2.0837
CHD7	6	8.07e-09	2.29e-07	0.000413	7	5	-1.3646	0.99208	0.99207	1	21340	0	-1.3646
HAVCR1	6	8.12e-09	2.29e-07	0.000413	8	6	-1.5452	0.99993	0.99993	1	21643	0	-1.5452
ASH2L	6	1.88e-08	2.29e-07	0.000413	9	5	-1.6523	0.99433	0.99437	1	21405	0	-1.6523
ATP11A	6	6.88e-08	2.29e-07	0.000413	10	3	-1.8428	0.96101	0.96101	1	20572	0	-1.8428
AXIN1	6	7.43e-08	2.29e-07	0.000413	11	4	-1.8325	0.99126	0.99125	1	21310	0	-1.8325
WDR82	6	8.57e-08	2.29e-07	0.000413	12	6	-1.6121	1	1	1	21662	0	-1.6121
EMC6	6	2.02e-07	6.86e-07	0.00099	13	4	-1.4751	0.99503	0.99507	1	21423	0	-1.4751
RAB10	6	2.09e-07	6.86e-07	0.00099	14	5	-1.509	0.99859	0.99859	1	21558	0	-1.509
MSTO1	6	2.21e-07	6.86e-07	0.00099	15	5	-1.9633	0.99137	0.99136	1	21315	0	-1.9633
KDM6A	6	3.46e-07	1.6e-06	0.002038	16	4	-1.3681	0.99865	0.99866	1	21564	0	-1.3681
CSNK1A1	6	3.6e-07	1.6e-06	0.002038	17	4	-1.7778	0.69954	0.70493	1	15078	1	-1.7778
DYRK1A	6	6.02e-07	3.43e-06	0.004125	18	3	-1.0628	0.99933	0.99931	1	21609	0	-1.0628
SCARB1	6	6.91e-07	4.34e-06	0.004703	19	5	-1.4177	0.69647	0.70228	1	15026	1	-1.4177
TMEM199	6	7.35e-07	4.34e-06	0.004703	20	5	-1.5491	0.99871	0.99872	1	21568	0	-1.5491
TAF2	6	8.97e-07	4.8e-06	0.00495	21	4	-0.9207	0.97333	0.97328	1	20854	0	-0.9207
ELOF1	6	1.04e-06	5.26e-06	0.005176	22	4	-1.3481	0.99955	0.99954	1	21622	0	-1.3481
GTF3C4	6	1.19e-06	6.63e-06	0.006242	23	6	-2.5514	0.99993	0.99994	1	21644	0	-2.5514
HNRNPU	6	1.27e-06	8e-06	0.006931	24	5	-1.6179	0.99509	0.99513	1	21426	0	-1.6179
COMMD2	6	1.3e-06	8e-06	0.006931	25	5	-1.1369	0.99915	0.99914	1	21595	0	-1.1369
NDUFA13	6	1.82e-06	1.21e-05	0.009718	26	5	-1.6358	0.81126	0.81123	1	17326	0	-1.6358
DCPS	6	1.83e-06	1.21e-05	0.009718	27	4	-1.2962	0.81591	0.81586	1	17431	0	-1.2962
PIK3C3	6	2.08e-06	1.3e-05	0.00973	28	3	-0.29899	0.54537	0.5924	1	12744	1	-0.29899
ATP6V1H	6	2.1e-06	1.3e-05	0.00973	29	6	-1.8549	0.99999	0.99999	1	21655	0	-1.8549
SRCAP	6	2.19e-06	1.35e-05	0.009736	30	6	-1.2417	0.99999	1	1	21657	0	-1.2417
USO1	6	2.31e-06	1.39e-05	0.009741	31	5	-1.2716	0.36015	0.47877	1	10296	1	-1.2716
NOMO1	6	2.39e-06	1.44e-05	0.009746	32	5	-0.51617	0.88738	0.88725	1	18959	0	-0.51617
LSM7	6	2.88e-06	1.85e-05	0.012151	33	5	-0.93305	0.9992	0.99919	1	21598	0	-0.93305
CCDC22	6	3.21e-06	1.94e-05	0.012306	34	5	-1.607	0.9989	0.9989	1	21578	0	-1.607
KCTD5	6	3.29e-06	1.99e-05	0.012306	35	4	-0.85879	0.77573	0.77567	1	16563	0	-0.85879
EXOC4	6	3.78e-06	2.17e-05	0.013064	36	5	-1.0244	0.99881	0.9988	1	21571	0	-1.0244
EIF2B4	6	5.28e-06	3.22e-05	0.018369	37	6	-1.5697	0.99999	1	1	21658	0	-1.5697
CHMP1A	6	5.29e-06	3.22e-05	0.018369	38	5	-1.3147	0.98038	0.98036	1	21012	0	-1.3147
TAF8	6	5.82e-06	3.36e-05	0.01866	39	6	-2.6647	0.99994	0.99994	1	21645	0	-2.6647
STK11	6	6.14e-06	3.54e-05	0.018977	40	5	-1.1725	0.99679	0.99682	1	21484	0	-1.1725
CCT8	6	6.45e-06	3.63e-05	0.018977	41	5	-1.9361	0.99904	0.99903	1	21585	0	-1.9361
SUMO2	6	6.63e-06	3.68e-05	0.018977	42	5	-1.3514	0.99229	0.99228	1	21345	0	-1.3514
PAGE4	6	7.01e-06	3.93e-05	0.019802	43	4	-1.2372	0.99706	0.99712	1	21499	0	-1.2372
TMEM165	6	7.59e-06	4.32e-05	0.021265	44	4	-1.3577	0.98942	0.98943	1	21247	0	-1.3577
ZW10	6	8.59e-06	4.82e-05	0.023212	45	4	-1.3653	0.98545	0.98539	1	21150	0	-1.3653
WDR7	6	9.17e-06	5.14e-05	0.024214	46	3	-1.3315	0.92962	0.92953	1	19888	0	-1.3315
RBBP5	6	9.58e-06	5.28e-05	0.024331	47	5	-1.3221	0.99855	0.99856	1	21555	0	-1.3221
STRAP	6	1.02e-05	5.74e-05	0.024848	48	6	-1.0675	0.99995	0.99995	1	21648	0	-1.0675
SPDYE2	4	1.04e-05	5.74e-05	0.024848	49	3	-0.74937	0.99668	0.99672	1	21480	0	-0.74937
UBE2I	6	1.08e-05	5.87e-05	0.024848	50	5	-1.0013	0.9914	0.99139	1	21317	0	-1.0013
GET4	6	1.09e-05	5.92e-05	0.024848	51	4	-0.93969	0.92866	0.92856	1	19872	0	-0.93969
hsa-mir-3180-4	4	1.1e-05	5.96e-05	0.024848	52	3	-1.3592	0.99119	0.99117	1	21306	0	-1.3592
INTS12	6	1.19e-05	6.51e-05	0.026311	53	5	-1.3182	0.99939	0.99937	1	21613	0	-1.3182
ACTR3	6	1.19e-05	6.56e-05	0.026311	54	5	-1.5313	0.52042	0.57678	1	12422	1	-1.5313
MEF2B	6	1.39e-05	7.43e-05	0.029253	55	6	-0.65676	0.99999	0.99999	1	21656	0	-0.65676
DENND4A	6	1.47e-05	7.88e-05	0.030499	56	4	-1.4078	0.78718	0.78715	1	16808	0	-1.4078
TAF1	6	1.78e-05	9.53e-05	0.036104	57	3	-0.98627	0.99397	0.99396	1	21393	0	-0.98627
GTF2H2	6	1.82e-05	9.67e-05	0.036104	58	4	-1.1133	0.35635	0.47481	1	10201	2	-1.1133
GPN3	6	1.88e-05	0.00010261	0.037674	59	4	-2.657	0.35368	0.47205	1	10142	1	-2.657
GDI2	6	1.92e-05	0.00010718	0.038387	60	4	-1.1417	0.95002	0.95	1	20339	0	-1.1417
GREB1L	6	1.93e-05	0.00010809	0.038387	61	5	-1.1698	0.9248	0.92473	1	19784	0	-1.1698
DARS	6	2.04e-05	0.00011586	0.040482	62	6	-0.72861	0.99998	0.99999	1	21653	0	-0.72861
CDIPT	6	2.17e-05	0.00012226	0.041508	63	6	-1.0979	0.99998	0.99999	1	21652	0	-1.0979
MESDC2	6	2.18e-05	0.00012455	0.041508	64	3	-0.96401	0.99607	0.99612	1	21453	0	-0.96401
LONP1	6	2.18e-05	0.00012455	0.041508	65	5	-1.4736	0.99854	0.99856	1	21554	0	-1.4736
UBA2	6	2.24e-05	0.00012729	0.041779	66	5	-2.5777	0.99203	0.99202	1	21336	0	-2.5777
CCDC53	6	2.28e-05	0.00013049	0.04219	67	5	-1.317	0.54916	0.5948	1	12802	1	-1.317
ALG2	6	2.37e-05	0.0001346	0.04288	68	6	-1.5479	0.99998	0.99998	1	21651	0	-1.5479
POLR3H	6	2.48e-05	0.00013917	0.043211	69	4	-2.6462	0.99126	0.99125	1	21312	0	-2.6462
NCBP1	6	2.51e-05	0.00013963	0.043211	70	5	-1.5013	0.866	0.86608	1	18495	0	-1.5013
UXT	6	2.7e-05	0.00014785	0.045112	71	3	-1.7895	0.80765	0.80762	1	17256	0	-1.7895
PIK3R4	6	2.75e-05	0.00015105	0.045448	72	4	-0.89066	0.83175	0.83176	1	17754	0	-0.89066
MBTPS1	6	2.8e-05	0.00015517	0.045959	73	2	0.039695	0.24711	0.36306	1	7827	2	0.039695
SNRPD1	6	2.83e-05	0.000157	0.045959	74	6	-1.5965	0.99997	0.99998	1	21650	0	-1.5965
MTA2	6	2.97e-05	0.00016339	0.047195	75	6	-1.3777	0.99997	0.99997	1	21649	0	-1.3777
STX4	6	3.06e-05	0.00016614	0.047355	76	5	-1.4396	0.58884	0.62091	1	13350	1	-1.4396
RABIF	6	3.5e-05	0.00018899	0.05317	77	4	-0.98971	0.70693	0.71136	1	15216	1	-0.98971
CABIN1	6	4.19e-05	0.00022327	0.060705	78	4	-0.98175	0.35067	0.46898	1	10077	1	-0.98175
SPNS1	6	4.2e-05	0.00022372	0.060705	79	5	-0.63222	0.97971	0.97969	1	20999	0	-0.63222
EXOC3	6	4.21e-05	0.00022418	0.060705	80	5	-0.76092	0.98855	0.98852	1	21235	0	-0.76092
FNTB	6	4.3e-05	0.00022829	0.061056	81	4	-1.0702	0.62829	0.64881	1	13923	1	-1.0702
IPO9	6	4.48e-05	0.00023606	0.062364	82	4	-1.0641	0.86777	0.86789	1	18533	0	-1.0641
SRP19	6	4.64e-05	0.00024521	0.063237	84	4	-1.1251	0.037399	0.091761	0.964041	2057	1	-1.1251
PRR20A	6	4.62e-05	0.00024429	0.063237	83	4	-0.42115	0.99198	0.99196	1	21335	0	-0.42115
RAB7A	6	4.77e-05	0.00024978	0.063658	85	3	-0.32852	0.86441	0.86453	1	18463	0	-0.32852
EWSR1	6	4.86e-05	0.00025343	0.063838	86	5	-2.0164	0.24464	0.36062	1	7774	1	-2.0164
MED26	6	4.9e-05	0.00025755	0.064129	87	3	-1.1597	0.18214	0.29642	1	6360	2	-1.1597
KMT2D	6	5.15e-05	0.00026989	0.066438	88	5	-0.94203	0.7109	0.71477	1	15282	1	-0.94203
PDRG1	6	5.32e-05	0.00027994	0.067403	89	6	-1.0179	0.99995	0.99995	1	21647	0	-1.0179
PKD1	6	5.34e-05	0.00028085	0.067403	90	4	-1.2021	0.74373	0.7444	1	15919	1	-1.2021
GYG2	6	5.47e-05	0.00028314	0.067403	91	5	-1.206	0.88589	0.88567	1	18924	0	-1.206
WDR61	6	5.71e-05	0.00029365	0.068833	92	3	-1.5886	0.77825	0.77821	1	16616	0	-1.5886
FZR1	6	5.8e-05	0.00029822	0.068833	93	5	-1.2197	0.98956	0.98956	1	21252	0	-1.2197
hsa-mir-6511a-4	4	5.81e-05	0.00029868	0.068833	94	4	-1.0977	0.99994	0.99995	1	21646	0	-1.0977
CTNNBIP1	6	5.89e-05	0.00030279	0.068843	95	3	-0.62328	0.99126	0.99125	1	21309	0	-0.62328
ARPC4	6	5.95e-05	0.00030508	0.068843	96	3	-0.77377	0.99533	0.99536	1	21438	0	-0.77377
GIGYF2	6	6.01e-05	0.00030873	0.06895	97	4	-1.0387	0.68462	0.6925	1	14818	1	-1.0387
VPS33A	6	6.59e-05	0.0003325	0.0735	98	3	-0.59559	0.4098	0.51421	1	11065	1	-0.59559
INTS6	6	7.24e-05	0.00036404	0.079658	99	4	-1.0062	0.61698	0.64068	1	13757	1	-1.0062
MRPL33	6	7.32e-05	0.00036952	0.08005	100	4	-1.9106	0.45973	0.54118	1	11658	1	-1.9106
USP9X	6	7.64e-05	0.0003878	0.082751	101	4	-1.0582	0.39924	0.50868	1	10947	1	-1.0582
RUVBL1	6	7.67e-05	0.00038963	0.082751	102	4	-0.88145	0.98046	0.98045	1	21013	0	-0.88145
hsa-mir-3680-1	4	7.79e-05	0.00039512	0.083101	103	2	-0.95251	0.98866	0.98863	1	21237	0	-0.95251
CERS2	6	8.24e-05	0.00041248	0.085761	104	6	-1.0992	0.99992	0.99992	1	21642	0	-1.0992
HSPE1	6	8.26e-05	0.00041568	0.085761	105	4	-1.3252	0.52947	0.58234	1	12524	1	-1.3252
TBC1D25	6	9.38e-05	0.00047144	0.09628	106	4	-0.88298	0.74375	0.74441	1	15920	1	-0.88298
KDM8	6	9.48e-05	0.00047556	0.09628	107	6	-0.42491	0.99991	0.99991	1	21641	0	-0.42491
BOLA2	6	9.77e-05	0.00048561	0.097406	108	4	-0.59123	0.99442	0.99446	1	21410	0	-0.59123
HNF4A	6	9.93e-05	0.00049292	0.097965	109	3	-0.29756	0.64117	0.65839	1	14130	1	-0.29756
SSX4	5	0.00010096	0.00050161	0.098785	110	3	-1.2559	0.83644	0.8365	1	17855	0	-1.2559
KAT8	6	0.00010662	0.00052675	0.102801	111	6	-0.78315	0.99989	0.9999	1	21640	0	-0.78315
HSD17B10	6	0.00010972	0.00054274	0.104574	112	5	-1.1919	0.99858	0.99859	1	21556	0	-1.1919
UVRAG	6	0.00011044	0.00054548	0.104574	113	4	-1.3494	0.55197	0.59662	1	12845	1	-1.3494
ANO8	6	0.00011256	0.00055828	0.106088	114	5	-0.83203	0.99483	0.99486	1	21421	0	-0.83203
IRS1	6	0.00012083	0.00059279	0.111666	115	5	-1.0172	0.94257	0.94254	1	20178	0	-1.0172
GMPPB	6	0.00012348	0.00060581	0.113136	116	4	-1.8841	0.99776	0.99778	1	21528	0	-1.8841
C16orf62	6	0.0001245	0.00061267	0.113438	117	3	-0.20146	0.64823	0.66381	1	14235	1	-0.20146
LOC100132247	6	0.00012556	0.00061815	0.113484	118	4	-0.71779	0.69691	0.70266	1	15032	1	-0.71779
DHX36	6	0.00012885	0.0006273	0.11382	119	3	-0.58335	0.096409	0.19373	0.997867	4202	1	-0.58335
GAGE12B	2	0.00013008	0.0006305	0.11382	120	2	-1.1123	0.99987	0.99987	1	21639	0	-1.1123
KLHL20	6	0.00013314	0.00064512	0.115498	121	5	-0.74995	0.88625	0.88603	1	18934	0	-0.74995
NUDT21	6	0.00013476	0.00065289	0.115931	122	2	-0.47823	0.2236	0.33923	1	7305	2	-0.47823
ARPC3	6	0.0001437	0.00069311	0.122072	123	4	-1.1051	0.17872	0.29282	1	6280	2	-1.1051
GTF2A2	6	0.00014853	0.00070774	0.122653	125	2	0.30458	0.036182	0.089551	0.963409	2009	2	0.30458
SNAPC3	6	0.00014632	0.00070271	0.122653	124	5	-0.98508	0.99976	0.99976	1	21634	0	-0.98508
LOC100862671	6	0.00015689	0.0007411	0.127416	126	5	-0.75332	0.25315	0.36915	1	7944	1	-0.75332
BATF	6	0.00016739	0.00078543	0.133975	127	4	-1.064	0.9972	0.99725	1	21507	0	-1.064
SRP9	6	0.00017043	0.0007996	0.135326	128	2	-0.79397	0.10326	0.20511	0.998892	4446	2	-0.79397
ALDH3A2	6	0.00017329	0.00081331	0.136082	129	5	-0.48318	0.99908	0.99907	1	21588	0	-0.48318
DHRSX_X	6	0.00017492	0.00082108	0.136082	130	3	-0.43451	0.88826	0.88813	1	18973	0	-0.43451
ELP3	6	0.00017532	0.00082291	0.136082	131	5	-1.4357	0.95711	0.95707	1	20492	0	-1.4357
PLA2G10	6	0.00019562	0.00091021	0.149377	132	4	-0.67575	0.2572	0.37328	1	8033	1	-0.67575
EPAS1	6	0.00019728	0.00092072	0.149934	133	4	-0.91125	0.33284	0.45045	1	9680	2	-0.91125
KBTBD12	6	0.00020024	0.00093306	0.149934	134	5	-0.64936	0.99539	0.99542	1	21439	0	-0.64936
LAMTOR4	6	0.00020182	0.00093946	0.149934	135	5	-0.84407	0.99764	0.99766	1	21525	0	-0.84407
KLHDC7B	6	0.00020245	0.00094129	0.149934	136	5	-0.91568	0.81543	0.81538	1	17418	0	-0.91568
PIAS1	6	0.00020562	0.000955	0.151008	137	3	-0.68994	0.88725	0.8871	1	18955	0	-0.68994
STT3A	6	0.00021966	0.0010176	0.159743	138	4	-1.2899	0.99927	0.99926	1	21604	0	-1.2899
NUDT17	6	0.00022222	0.0010268	0.160019	139	4	-0.79733	0.99758	0.99761	1	21522	0	-0.79733
VPS51	6	0.0002254	0.0010391	0.160785	140	5	-1.2247	0.61101	0.63644	1	13660	1	-1.2247
EBP	6	0.00022901	0.0010487	0.161119	141	5	-0.88945	0.99987	0.99986	1	21638	0	-0.88945
COMMD10	6	0.00023514	0.0010715	0.163471	142	3	-1.1083	0.23103	0.34682	1	7462	1	-1.1083
HYOU1	6	0.00023809	0.0010866	0.163813	143	4	-1.1435	0.76565	0.7657	1	16363	0	-1.1435
hsa-mir-3670-1	4	0.00023858	0.0010889	0.163813	144	4	-1.2101	0.99883	0.99883	1	21574	0	-1.2101
SEC61B	6	0.00024104	0.0011022	0.164664	145	5	-0.65753	0.99438	0.99442	1	21407	0	-0.65753
PIM2	6	0.00025216	0.0011483	0.16948	146	3	-0.89269	0.41303	0.51589	1	11101	1	-0.89269
ATP5O	6	0.00025335	0.0011534	0.16948	147	5	-1.6114	0.99838	0.99841	1	21549	0	-1.6114
MARS2	6	0.00025625	0.0011625	0.16948	148	4	-2.4136	0.6404	0.65781	1	14113	1	-2.4136
ZNF263	6	0.00025723	0.0011657	0.16948	149	5	-1.1225	0.98635	0.98631	1	21174	0	-1.1225
hsa-mir-550a-1	4	0.00026072	0.0011799	0.170396	150	3	-0.40948	0.63294	0.65224	1	14008	0	-0.40948
HAPLN1	6	0.00027038	0.0012178	0.17471	151	5	-2.2382	0.99602	0.99607	1	21451	0	-2.2382
RPUSD4	6	0.00027458	0.0012333	0.175775	152	5	-0.71496	0.97135	0.97125	1	20806	0	-0.71496
GZF1	6	0.00029789	0.0013302	0.188345	153	3	-0.94492	0.19344	0.30845	1	6627	1	-0.94492
MFAP1	6	0.00030385	0.001354	0.190465	154	5	-2.0833	0.93777	0.93773	1	20076	0	-2.0833
DNLZ	6	0.00031065	0.0013805	0.192942	155	4	-0.53574	0.26923	0.3855	1	8267	1	-0.53574
CIAO1	6	0.00031509	0.0014002	0.193853	156	5	-1.1868	0.085088	0.17473	0.993072	3809	1	-1.1868
PQBP1	6	0.0003168	0.0014061	0.193853	157	5	-0.94257	0.42482	0.5221	1	11237	1	-0.94257
SCYL1	6	0.00031816	0.0014139	0.193853	158	5	-0.72353	0.96345	0.96342	1	20633	0	-0.72353
FAM21B	6	0.00032642	0.0014555	0.196821	159	2	-0.49437	0.017228	0.050426	0.922241	1183	2	-0.49437
HDAC6	6	0.00032795	0.0014596	0.196821	160	5	-0.75503	0.99836	0.99839	1	21548	0	-0.75503
C7orf26	6	0.00032897	0.0014628	0.196821	161	5	-0.88908	0.82984	0.82982	1	17722	0	-0.88908
INTS1	6	0.00033424	0.0014902	0.19745	162	3	-0.50869	0.46682	0.54521	1	11763	1	-0.50869
TRIAP1	6	0.00033659	0.0014971	0.19745	163	4	-0.65719	0.99948	0.99947	1	21620	0	-0.65719
POLR1B	6	0.00033799	0.001503	0.19745	164	5	-0.86975	0.99798	0.99801	1	21536	0	-0.86975
SETD1A	6	0.00033818	0.0015039	0.19745	165	5	-1.4	0.91831	0.91827	1	19631	0	-1.4
DPY30	6	0.00034249	0.0015258	0.199117	166	4	-0.81216	0.99961	0.9996	1	21624	0	-0.81216
ERP44	6	0.00034554	0.001535	0.199117	167	3	-0.70142	0.38158	0.49961	1	10753	1	-0.70142
HDAC3	6	0.00035083	0.001556	0.200642	168	3	-0.69668	0.34105	0.45896	1	9870	2	-0.69668
GNB2L1	6	0.000356	0.0015768	0.20156	169	5	-1.129	0.98383	0.9838	1	21102	0	-1.129
POLR2C	6	0.00035826	0.0015866	0.20156	170	5	-0.99709	0.74058	0.74146	1	15861	1	-0.99709
SETDB1	6	0.00036135	0.001599	0.20156	171	4	-1.5735	0.99555	0.99559	1	21442	0	-1.5735
SSX2	6	0.0003617	0.0016003	0.20156	172	3	-0.33501	0.66986	0.68059	1	14577	1	-0.33501
CBWD1	6	0.00037911	0.0016657	0.206543	174	4	-0.60505	0.011173	0.034192	0.87963	839	2	-0.60505
RTBDN	6	0.0003762	0.0016543	0.206543	173	4	-0.63423	0.6316	0.65124	1	13979	1	-0.63423
GNB1L	6	0.00038143	0.0016721	0.206543	175	4	-1.0378	0.23977	0.35562	1	7661	2	-1.0378
DNAJC17	6	0.00038223	0.001678	0.206543	176	5	-1.0599	0.97965	0.97963	1	20997	0	-1.0599
POLR2E	6	0.00038737	0.0016963	0.207504	177	4	-1.356	0.99532	0.99535	1	21437	0	-1.356
ATP5F1	6	0.00038961	0.001705	0.207504	178	5	-0.89283	0.16844	0.2818	1	6039	1	-0.89283
NDUFB10	6	0.00040616	0.00178	0.215416	179	4	-1.3299	0.99696	0.99701	1	21493	0	-1.3299
CTDP1	6	0.00042306	0.0018558	0.22335	180	5	-1.1724	0.98757	0.98752	1	21214	0	-1.1724
GTF2H3	6	0.00042646	0.0018741	0.224304	181	5	-0.86507	0.99422	0.99424	1	21400	0	-0.86507
GTF3A	6	0.00043654	0.0019189	0.227912	182	4	-1.0896	0.96661	0.96658	1	20692	0	-1.0896
CTR9	6	0.00043835	0.0019253	0.227912	183	3	-0.60652	0.90048	0.90039	1	19255	0	-0.60652
hsa-mir-3179-1	4	0.00044221	0.0019386	0.228234	184	3	-0.72469	0.71435	0.71779	1	15354	0	-0.72469
NRBP1	6	0.00046138	0.0020076	0.235082	185	2	-0.86919	0.79397	0.79396	1	16956	0	-0.86919
KIAA1432	6	0.00046413	0.0020199	0.235255	186	4	-0.6964	0.85268	0.85282	1	18224	0	-0.6964
ALG14	6	0.00047011	0.0020428	0.236644	187	5	-1.1038	0.99924	0.99923	1	21600	0	-1.1038
MTFP1	6	0.00047799	0.0020812	0.239809	188	2	-0.10177	0.16624	0.27948	1	5998	1	-0.10177
GAPDH	6	0.00048152	0.0020949	0.240112	189	4	-1.2999	0.98973	0.98974	1	21259	0	-1.2999
C12orf43	6	0.00048486	0.0021063	0.240151	190	4	-0.84623	0.19113	0.30595	1	6572	1	-0.84623
SYP	6	0.00049241	0.0021351	0.24216	191	4	-0.60281	0.67076	0.68128	1	14593	1	-0.60281
TMEM183A	6	0.00050345	0.0021739	0.243672	192	2	-0.30606	0.62301	0.64503	1	13847	1	-0.30606
SMNDC1	6	0.00050488	0.0021781	0.243672	193	2	-0.40661	0.2275	0.3432	1	7383	2	-0.40661
MRPL21	6	0.00050593	0.0021822	0.243672	194	3	-0.5555	0.86853	0.86861	1	18551	0	-0.5555
CSNK2A2	6	0.00051341	0.0022119	0.245722	195	3	-0.64061	0.37139	0.49045	1	10547	1	-0.64061
SBK1	6	0.0005325	0.0022891	0.253006	196	4	-0.54279	0.99937	0.99935	1	21611	0	-0.54279
KIAA1033	6	0.00053692	0.0023079	0.253782	197	2	0.020567	0.50399	0.56682	1	12234	1	0.020567
POLRMT	6	0.00054813	0.0023435	0.256401	198	5	-1.5849	0.98124	0.98118	1	21040	0	-1.5849
TRAPPC1	6	0.00055494	0.0023737	0.257106	199	3	-0.91052	0.80551	0.80552	1	17206	0	-0.91052
RANBP1	6	0.00055631	0.0023792	0.257106	200	4	-0.88378	0.99645	0.99649	1	21471	0	-0.88378
PPIL2	6	0.00055747	0.0023856	0.257106	201	4	-0.8667	0.95084	0.95081	1	20364	0	-0.8667
RCC1	6	0.00056159	0.0024011	0.257499	202	5	-1.2374	0.99882	0.99882	1	21573	0	-1.2374
ARFRP1	6	0.00056993	0.0024377	0.260133	203	4	-0.88514	0.12743	0.23839	1	5138	1	-0.88514
DPAGT1	6	0.00060127	0.0025592	0.271768	204	5	-0.91202	0.5178	0.5752	1	12384	1	-0.91202
DGKK	6	0.00063724	0.0026995	0.285269	205	3	-0.72575	0.99169	0.99167	1	21325	0	-0.72575
PGS1	6	0.00065506	0.0027713	0.29143	206	2	-0.62535	0.98818	0.98816	1	21229	0	-0.62535
WDR13	6	0.00066223	0.0027955	0.292558	207	5	-0.79673	0.8861	0.88587	1	18929	0	-0.79673
SSH3	6	0.00067669	0.0028517	0.297006	208	5	-1.0346	0.99441	0.99444	1	21409	0	-1.0346
TBX6	6	0.00068011	0.0028686	0.297338	209	4	-0.59278	0.99089	0.99088	1	21298	0	-0.59278
hsa-mir-6770-1	4	0.00070939	0.0029793	0.307331	210	3	-0.65401	0.92468	0.92461	1	19779	0	-0.65401
ZNF646	6	0.00071447	0.0029971	0.307705	211	3	-0.48934	0.29333	0.41004	1	8813	1	-0.48934
TM9SF2	6	0.0007302	0.0030542	0.310859	212	4	-0.67601	0.88022	0.88013	1	18799	0	-0.67601
NOTCH2NL	6	0.00073048	0.0030565	0.310859	213	5	-0.88207	0.79249	0.79251	1	16929	0	-0.88207
VPS29	6	0.0007356	0.0030748	0.311257	214	3	-1.1637	0.92995	0.92985	1	19894	0	-1.1637
UHRF2	6	0.00075663	0.003158	0.315555	215	3	-0.69211	0.062357	0.13607	0.975627	3016	2	-0.69211
INPP5J	6	0.00075932	0.0031648	0.315555	216	4	-0.87256	0.81205	0.81201	1	17344	0	-0.87256
GTPBP5	6	0.00075995	0.0031698	0.315555	217	4	-0.29265	0.88495	0.88476	1	18908	0	-0.29265
TMEM258	6	0.00076438	0.0031868	0.315555	218	5	-1.0503	0.99728	0.99732	1	21510	0	-1.0503
SEZ6L2	6	0.00076908	0.0032018	0.315555	219	5	-0.43801	0.9679	0.96788	1	20729	0	-0.43801
SSR2	6	0.00077325	0.0032151	0.315555	220	4	-0.89088	0.39198	0.50492	1	10863	1	-0.89088
GTF2E1	6	0.00077439	0.0032192	0.315555	221	5	-0.69041	0.97304	0.97297	1	20841	0	-0.69041
hsa-mir-222	4	0.00077912	0.0032379	0.315962	222	4	-1.9634	0.99922	0.99921	1	21599	0	-1.9634
C1GALT1	6	0.00082738	0.0034139	0.320167	230	3	-0.36372	0.059939	0.13186	0.975627	2914	3	-0.36372
SLX4	6	0.00081718	0.0033705	0.320167	227	3	-0.17403	0.079805	0.16577	0.990267	3624	1	-0.17403
CMTR1	6	0.00080199	0.0033163	0.320167	223	5	-0.67883	0.74885	0.74925	1	16025	1	-0.67883
YPEL1	6	0.00080241	0.0033175	0.320167	224	5	-0.54691	0.99892	0.99891	1	21579	0	-0.54691
DNAJC18	6	0.00081125	0.0033499	0.320167	225	5	-0.67137	0.28971	0.40636	1	8730	1	-0.67137
AHSP	6	0.00081707	0.00337	0.320167	226	2	-1.1396	0.88159	0.88148	1	18836	0	-1.1396
WDR18	6	0.00082375	0.0033975	0.320167	228	4	-0.65308	0.76666	0.76672	1	16381	0	-0.65308
CHRNA3	6	0.00082454	0.0034029	0.320167	229	3	-0.89184	0.20272	0.31824	1	6845	1	-0.89184
ACTR6	6	0.00082984	0.0034253	0.320167	231	3	-0.35362	0.90434	0.90421	1	19329	0	-0.35362
BRICD5	6	0.00083269	0.00344	0.320167	232	4	-0.69548	0.94629	0.9463	1	20257	0	-0.69548
NSFL1C	6	0.00083397	0.0034436	0.320167	233	5	-0.61671	0.96305	0.96301	1	20624	0	-0.61671
C19orf52	6	0.00084776	0.0035081	0.323383	235	5	-0.96726	0.029539	0.077176	0.954683	1746	1	-0.96726
NOP16	6	0.00084503	0.0034957	0.323383	234	5	-1.3475	0.99971	0.99971	1	21633	0	-1.3475
COG5	6	0.00086498	0.0035848	0.327877	236	2	-0.14167	0.68506	0.69287	1	14827	1	-0.14167
SRP14	6	0.00086685	0.0035922	0.327877	237	2	-0.016093	0.20914	0.32465	1	6997	1	-0.016093
FAM219B	6	0.00087017	0.0036022	0.327877	238	4	-0.49427	0.97402	0.97397	1	20869	0	-0.49427
MRPS16	6	0.00087961	0.0036347	0.328232	239	4	-0.81337	0.9768	0.97677	1	20935	0	-0.81337
MEF2BNB	6	0.00088187	0.0036415	0.328232	240	2	-0.58718	0.99569	0.99572	1	21447	0	-0.58718
CORO1A	6	0.00088439	0.0036516	0.328232	241	4	-0.69982	0.99464	0.99467	1	21416	0	-0.69982
RHOT2	6	0.0008957	0.0036964	0.330885	242	4	-0.63203	0.959	0.95902	1	20528	0	-0.63203
EEFSEC	6	0.00093639	0.0038527	0.343458	243	4	-0.77731	0.98999	0.99	1	21270	0	-0.77731
KLC2	6	0.00094752	0.0039007	0.346311	244	4	-0.69545	0.89602	0.89587	1	19146	0	-0.69545
SLC4A1AP	6	0.00095375	0.0039194	0.346555	245	3	-0.61282	0.98726	0.98721	1	21206	0	-0.61282
PTPMT1	6	0.00097924	0.0040181	0.352768	246	5	-0.69687	0.9993	0.99928	1	21606	0	-0.69687
NSUN3	6	0.00098054	0.0040222	0.352768	247	4	-0.75681	0.23074	0.34652	1	7451	1	-0.75681
LOC100288332	4	0.0009874	0.0040414	0.353022	248	3	-0.36481	0.92184	0.92177	1	19714	0	-0.36481
POLR2L	6	0.0010007	0.0040903	0.354634	249	5	-0.81599	0.99968	0.99968	1	21629	0	-0.81599
DAP3	6	0.0010013	0.0040926	0.354634	250	5	-1.3895	0.98786	0.98785	1	21220	0	-1.3895
TSPYL4	6	0.0010088	0.0041255	0.356061	251	4	-0.60159	0.63136	0.65107	1	13974	1	-0.60159
GPR52	6	0.0010208	0.0041712	0.35727	252	5	-0.70239	0.62555	0.64683	1	13888	1	-0.70239
RDH14	6	0.0010213	0.0041744	0.35727	253	3	-0.87825	0.41564	0.51724	1	11134	1	-0.87825
HIST2H2BF	6	0.0010289	0.0042041	0.35727	254	3	-0.50209	0.91828	0.91825	1	19629	0	-0.50209
UBE2G2	6	0.0010292	0.0042055	0.35727	255	4	-1.0507	0.99415	0.99416	1	21396	0	-1.0507
LIMS3	6	0.0010371	0.0042448	0.358787	256	3	-0.46613	0.50489	0.56737	1	12246	1	-0.46613
PRPF38B	6	0.0010431	0.0042741	0.358787	257	3	-1.3098	0.98211	0.98205	1	21056	0	-1.3098
SHC1	6	0.001045	0.0042796	0.358787	258	3	-0.70369	0.8304	0.83039	1	17732	0	-0.70369
hsa-mir-532	4	0.0010487	0.0042896	0.358787	259	2	-0.20699	0.68361	0.69168	1	14797	0	-0.20699
KIAA1328	6	0.0010825	0.0044089	0.366431	260	3	-0.51491	0.98501	0.98496	1	21138	0	-0.51491
CEP120	6	0.0010845	0.0044148	0.366431	261	3	-0.60875	0.74552	0.74606	1	15957	1	-0.60875
MRP63	6	0.0011027	0.0044825	0.369668	262	4	-1.3495	0.99639	0.99643	1	21465	0	-1.3495
THOC6	6	0.0011034	0.004488	0.369668	263	4	-0.48787	0.98414	0.9841	1	21115	0	-0.48787
RNMT	6	0.0011143	0.0045259	0.371381	264	5	-0.91143	0.84265	0.84273	1	17987	0	-0.91143
hsa-mir-3180-1	4	0.0011203	0.004546	0.371623	265	3	-1.0597	0.95945	0.95947	1	20533	0	-1.0597
METAP1D	6	0.0011375	0.0046109	0.375512	266	5	-0.81863	0.11983	0.23045	1	4967	1	-0.81863
SLC26A4	6	0.0011478	0.0046475	0.377072	267	4	-0.61959	0.34073	0.45864	1	9864	1	-0.61959
STARD4	6	0.001155	0.0046786	0.377681	268	5	-0.51172	0.12272	0.23343	1	5035	1	-0.51172
ATP6AP2	6	0.0011649	0.0047206	0.377681	269	4	-1.2324	0.86713	0.86723	1	18515	0	-1.2324
CCDC178	6	0.0011652	0.0047215	0.377681	270	4	-1.2252	0.21055	0.3261	1	7023	1	-1.2252
NHLRC2	6	0.001166	0.0047247	0.377681	271	4	-1.0962	0.99446	0.9945	1	21411	0	-1.0962
FAM21A	6	0.0011782	0.0047809	0.38077	272	5	-0.70448	0.99007	0.99007	1	21272	0	-0.70448
GPN2	6	0.0012066	0.0048806	0.383107	275	3	-1.1212	0.069116	0.14773	0.982581	3255	1	-1.1212
MID1	6	0.0011942	0.004839	0.383107	273	5	-0.73594	0.99863	0.99865	1	21561	0	-0.73594
COPS2	6	0.0012024	0.0048669	0.383107	274	4	-0.6391	0.95001	0.94999	1	20338	0	-0.6391
CAPZB	6	0.0012066	0.004881	0.383107	276	3	-1.2323	0.77554	0.77548	1	16559	0	-1.2323
TPP2	6	0.0012198	0.0049217	0.383388	277	3	-0.32602	0.13636	0.24781	1	5341	1	-0.32602
SERPINB5	6	0.001222	0.0049276	0.383388	278	5	-0.62968	0.1286	0.23963	1	5160	1	-0.62968
HNRNPA2B1	6	0.0012243	0.0049377	0.383388	279	4	-0.77796	0.97497	0.97493	1	20894	0	-0.77796
CLEC12B	6	0.0012377	0.0049925	0.386262	280	5	-0.54018	0.99984	0.99984	1	21637	0	-0.54018
hsa-mir-6831	4	0.0012486	0.005036	0.388235	281	3	-0.68922	0.034583	0.086657	0.960231	1955	1	-0.68922
SAFB	6	0.0012625	0.0050904	0.391036	282	5	-1.119	0.79226	0.79228	1	16925	0	-1.119
CCDC115	6	0.0012801	0.0051603	0.395008	283	4	-0.89199	0.82271	0.82271	1	17591	0	-0.89199
ZNHIT1	6	0.0012904	0.005195	0.395501	284	5	-0.49407	0.88668	0.8865	1	18942	0	-0.49407
DEXI	6	0.0012927	0.0052032	0.395501	285	4	-0.67733	0.8759	0.87593	1	18693	0	-0.67733
SNF8	6	0.0013121	0.0052791	0.399865	286	3	-0.25451	0.73143	0.73308	1	15677	1	-0.25451
ABCG5	6	0.0013255	0.0053362	0.402657	287	5	-0.50114	0.82152	0.82156	1	17567	0	-0.50114
PES1	6	0.0013303	0.0053532	0.402657	288	5	-0.77565	0.97398	0.97393	1	20868	0	-0.77565
FAM156A	6	0.0013501	0.0054363	0.407499	289	5	-0.40835	0.99961	0.99961	1	21625	0	-0.40835
RBM3	6	0.0013797	0.0055492	0.410421	290	5	-0.55437	0.688	0.69525	1	14885	1	-0.55437
SULT1A2	6	0.0013804	0.0055533	0.410421	291	4	-0.41447	0.11881	0.22938	1	4949	2	-0.41447
STX10	6	0.0013865	0.0055712	0.410421	292	5	-0.72557	0.96303	0.96299	1	20623	0	-0.72557
GFER	6	0.001391	0.0055844	0.410421	293	3	-0.60227	0.99931	0.99929	1	21607	0	-0.60227
CEBPZ	6	0.0013922	0.0055876	0.410421	294	3	-0.64216	0.2138	0.32934	1	7105	1	-0.64216
ORMDL1	6	0.0013926	0.005589	0.410421	295	4	-0.65145	0.52246	0.57802	1	12444	1	-0.65145
hsa-mir-1229	4	0.0014091	0.0056447	0.413115	296	3	-0.88412	0.86192	0.86201	1	18423	0	-0.88412
C2CD4A	6	0.0014234	0.0056868	0.414791	297	3	-0.5601	0.99458	0.99461	1	21413	0	-0.5601
MRPL9	6	0.00143	0.0057156	0.415167	298	4	-1.2461	0.97494	0.97489	1	20893	0	-1.2461
SYS1	6	0.0014386	0.005748	0.415167	299	4	-0.63031	0.97984	0.9798	1	21002	0	-0.63031
FAM57B	6	0.0014429	0.0057627	0.415167	300	4	-0.76028	0.96003	0.96005	1	20548	0	-0.76028
ATP13A1	6	0.0014455	0.0057686	0.415167	301	5	-1.0714	0.99907	0.99907	1	21587	0	-1.0714
MRPS21	6	0.0014716	0.0058751	0.417249	302	3	-1.4798	0.99566	0.99569	1	21446	0	-1.4798
TCERG1	6	0.0014716	0.0058751	0.417249	303	5	-1.2202	0.93228	0.93225	1	19962	0	-1.2202
C10orf53	6	0.0014737	0.0058829	0.417249	304	5	-0.56259	0.8898	0.88965	1	19001	0	-0.56259
hsa-mir-6886	4	0.0014741	0.0058833	0.417249	305	4	-0.79374	0.99853	0.99855	1	21553	0	-0.79374
RNF112	6	0.0014771	0.0058938	0.417249	306	3	-0.36391	0.97102	0.97091	1	20796	0	-0.36391
WDR55	6	0.0014944	0.0059665	0.421018	307	4	-0.82931	0.8939	0.89376	1	19103	0	-0.82931
CENPA	6	0.001509	0.0060282	0.423991	308	4	-0.47654	0.99758	0.99761	1	21523	0	-0.47654
TBX1	6	0.0015287	0.0061068	0.424875	309	5	-0.83842	0.99895	0.99895	1	21580	0	-0.83842
TP53TG3	6	0.0015309	0.0061137	0.424875	310	4	-0.33869	0.73853	0.73956	1	15825	1	-0.33869
SAP130	6	0.0015317	0.0061155	0.424875	311	4	-0.80271	0.94069	0.94064	1	20128	0	-0.80271
KRTAP13-2	6	0.0015359	0.0061297	0.424875	312	3	-0.36456	0.86051	0.86062	1	18395	0	-0.36456
NUDT5	6	0.0015435	0.0061553	0.424875	313	4	-1.0794	0.74849	0.74891	1	16014	1	-1.0794
CEP97	6	0.0015443	0.0061585	0.424875	314	5	-0.78804	0.53193	0.58385	1	12567	1	-0.78804
BRD2	6	0.0015732	0.006275	0.430879	315	4	-0.50932	0.14667	0.2588	1	5584	1	-0.50932
RNF151	6	0.0015796	0.0063075	0.430879	316	5	-0.55584	0.9793	0.97927	1	20988	0	-0.55584
hsa-mir-5187	4	0.001584	0.0063253	0.430879	317	2	-1.109	0.53898	0.58834	1	12654	1	-1.109
ZNF764	6	0.001588	0.0063415	0.430879	318	4	-0.80268	0.88234	0.88221	1	18858	0	-0.80268
SRGAP2	6	0.0015894	0.0063449	0.430879	319	4	-0.52417	0.12757	0.23853	1	5140	1	-0.52417
SYTL3	6	0.001616	0.0064615	0.433442	321	3	-0.43184	0.023245	0.065115	0.936228	1506	2	-0.43184
WDR33	6	0.0016052	0.0064149	0.433442	320	5	-0.87721	0.99864	0.99865	1	21563	0	-0.87721
CCT6A	6	0.0016162	0.0064619	0.433442	322	5	-0.8274	0.99645	0.99649	1	21470	0	-0.8274
ISG15	6	0.0016236	0.0064903	0.433442	323	3	-0.44119	0.79886	0.79882	1	17058	0	-0.44119
MRPL28	6	0.0016284	0.0065118	0.433442	324	3	-0.78978	0.98636	0.98631	1	21176	0	-0.78978
XAGE1A	6	0.0016293	0.0065163	0.433442	325	4	-0.38236	0.99273	0.99271	1	21359	0	-0.38236
EXOC2	6	0.0016312	0.0065227	0.433442	326	3	-0.47086	0.77322	0.77316	1	16503	0	-0.47086
WBSCR16	6	0.0016417	0.0065675	0.435083	327	4	-0.81482	0.48701	0.55691	1	12011	1	-0.81482
BST2	6	0.0016505	0.0066064	0.43608	328	5	-0.64232	0.43545	0.52782	1	11367	1	-0.64232
PFN1	6	0.0016542	0.0066228	0.43608	329	4	-0.59558	0.77259	0.77255	1	16493	0	-0.59558
RNPEP	6	0.0016727	0.00669	0.439169	330	5	-0.89382	0.93132	0.93126	1	19932	0	-0.89382
ZNF143	6	0.0016811	0.0067206	0.439316	331	5	-0.57326	0.92454	0.92447	1	19773	0	-0.57326
TAF7	6	0.0016881	0.0067462	0.439316	332	4	-0.52679	0.79139	0.79142	1	16904	0	-0.52679
COG2	6	0.0016903	0.0067531	0.439316	333	2	-0.061124	0.34335	0.46134	1	9914	1	-0.061124
RUVBL2	6	0.0016983	0.0067892	0.440342	334	4	-0.82183	0.93906	0.93899	1	20099	0	-0.82183
CLK2	6	0.0017153	0.0068513	0.440784	335	3	-0.37244	0.89481	0.89468	1	19120	0	-0.37244
MAOB	6	0.0017163	0.0068559	0.440784	336	2	0.042049	0.5149	0.57344	1	12357	1	0.042049
NAA60	6	0.0017215	0.0068747	0.440784	337	4	-0.57507	0.97669	0.97665	1	20929	0	-0.57507
GATS	6	0.0017225	0.0068774	0.440784	338	4	-0.77247	0.49551	0.56178	1	12113	1	-0.77247
HTRA2	6	0.0017326	0.0069163	0.441967	339	3	-1.2831	0.17543	0.28927	1	6208	2	-1.2831
DNAL4	6	0.0017741	0.0070844	0.443019	345	2	-0.28673	0.077319	0.16159	0.988167	3541	2	-0.28673
TMEM87B	6	0.0017465	0.0069725	0.443019	340	5	-0.68462	0.98166	0.98161	1	21047	0	-0.68462
MED8	6	0.0017501	0.0069871	0.443019	341	4	-0.94237	0.99772	0.99774	1	21527	0	-0.94237
CWC22	6	0.0017583	0.00702	0.443019	342	4	-1.4646	0.89062	0.89045	1	19019	0	-1.4646
MBTPS2	6	0.0017662	0.0070451	0.443019	343	3	-0.4035	0.97089	0.97079	1	20794	0	-0.4035
CAPZA1	6	0.0017738	0.0070835	0.443019	344	4	-0.56189	0.98099	0.98096	1	21028	0	-0.56189
METAP1	6	0.001776	0.0070876	0.443019	346	3	-0.59538	0.97633	0.97629	1	20922	0	-0.59538
GPR152	6	0.001778	0.0070963	0.443019	347	5	-0.8591	0.7039	0.70868	1	15162	1	-0.8591
ZBTB17	6	0.0017834	0.0071215	0.443311	348	4	-0.99356	0.2588	0.37494	1	8075	1	-0.99356
FURIN	6	0.0017994	0.0071891	0.44624	349	3	-0.59854	0.6925	0.69897	1	14953	1	-0.59854
PIP5K1A	6	0.0018077	0.0072206	0.446687	350	4	-0.62176	0.45439	0.53819	1	11589	1	-0.62176
BTF3	6	0.0018114	0.0072376	0.446687	351	2	-1.1295	0.99611	0.99615	1	21456	0	-1.1295
ALG13	6	0.0018249	0.0072915	0.448737	352	2	-0.045097	0.39832	0.5082	1	10929	1	-0.045097
TMEM30A	6	0.0018383	0.0073514	0.45114	353	2	-0.30453	0.38484	0.50125	1	10782	1	-0.30453
ADAMTSL1	6	0.0018467	0.0073884	0.451332	354	4	-0.47647	0.8317	0.83171	1	17752	0	-0.47647
C21orf59	6	0.0018491	0.0073961	0.451332	355	3	-0.42234	0.24409	0.36005	1	7757	1	-0.42234
SPATA5	6	0.001878	0.0075228	0.457768	356	4	-0.90575	0.96116	0.96115	1	20578	0	-0.90575
INTS8	6	0.0018834	0.0075502	0.45815	357	4	-0.8942	0.99944	0.99942	1	21617	0	-0.8942
MCCC2	6	0.0019054	0.0076343	0.461959	358	5	-0.5135	0.96686	0.96682	1	20697	0	-0.5135
NR2C2AP	6	0.0019403	0.0077691	0.468578	359	5	-0.91289	0.94447	0.94446	1	20219	0	-0.91289
MRPL42	6	0.001945	0.0077869	0.468578	360	2	-0.17662	0.3646	0.48342	1	10396	1	-0.17662
NonTargetingControlGuideForHuman_0002	1	0.0019546	0.0078226	0.469353	361	1	-3.6739	0.99805	0.99808	1	21537	0	-3.6739
UPF1	6	0.0019616	0.0078431	0.469353	362	5	-0.58417	0.99906	0.99905	1	21586	0	-0.58417
SLC38A5	6	0.0019704	0.0078792	0.470215	363	3	-0.47634	0.84454	0.84463	1	18036	0	-0.47634
MCM3	6	0.0019833	0.0079304	0.470553	364	4	-1.3084	0.35699	0.47547	1	10218	1	-1.3084
BMP15	6	0.0019924	0.0079643	0.470553	365	3	-0.376	0.84402	0.84409	1	18023	0	-0.376
MRPS31	6	0.0019964	0.007978	0.470553	366	4	-0.53464	0.99649	0.99653	1	21474	0	-0.53464
SDHAF1	6	0.0019984	0.0079857	0.470553	367	4	-1.266	0.93106	0.931	1	19924	0	-1.266
SSX2B	2	0.0019997	0.0079935	0.470553	368	1	-0.57553	0.23572	0.35157	1	7575	1	-0.57553
PHKG2	6	0.0020165	0.0080575	0.471862	369	5	-0.51089	0.9523	0.95229	1	20390	0	-0.51089
IBA57	6	0.0020172	0.0080593	0.471862	370	4	-0.68636	0.21896	0.33452	1	7212	1	-0.68636
TRIM4	6	0.0020265	0.0080913	0.472459	371	5	-0.77291	0.96115	0.96114	1	20577	0	-0.77291
PPP1R8	6	0.0020432	0.008159	0.475128	372	5	-0.63082	0.9866	0.98658	1	21185	0	-0.63082
CREB5	6	0.0020582	0.0082152	0.476664	373	3	-0.63442	0.57618	0.6123	1	13175	1	-0.63442
TFAM	6	0.0020619	0.0082293	0.476664	374	4	-1.0008	0.93319	0.93316	1	19978	0	-1.0008
FBXL5	6	0.002082	0.0082892	0.478851	375	5	-0.54507	0.99196	0.99195	1	21334	0	-0.54507
KAT7	6	0.0020975	0.0083441	0.479647	376	3	-0.93127	0.99713	0.99718	1	21501	0	-0.93127
MTHFD1	6	0.002099	0.0083473	0.479647	377	5	-0.58924	0.99951	0.9995	1	21621	0	-0.58924
B4GALT2	6	0.0022076	0.0087554	0.480975	394	4	-0.46051	0.023695	0.065974	0.937615	1521	1	-0.46051
ZBTB8OS	6	0.0021934	0.0086983	0.480975	389	2	0.69762	0.043215	0.10224	0.971817	2276	2	0.69762
USP39	6	0.002211	0.00877	0.480975	395	3	-0.042706	0.066416	0.14308	0.9768	3171	3	-0.042706
GP1BB	6	0.0021185	0.0084176	0.480975	378	4	-0.89586	0.3234	0.4408	1	9472	1	-0.89586
BID	6	0.0021222	0.0084309	0.480975	379	3	-0.30091	0.85365	0.85378	1	18244	0	-0.30091
GLOD5	6	0.0021327	0.0084711	0.480975	380	3	-0.75919	0.71137	0.71519	1	15291	1	-0.75919
DHDDS	6	0.0021346	0.008478	0.480975	381	5	-0.89642	0.99794	0.99796	1	21535	0	-0.89642
PAM16	6	0.0021366	0.0084844	0.480975	382	5	-0.72267	0.28998	0.40664	1	8735	1	-0.72267
NIPSNAP1	6	0.0021442	0.0085081	0.480975	383	3	-0.50829	0.98756	0.98751	1	21213	0	-0.50829
LACRT	6	0.0021612	0.0085817	0.480975	384	2	-0.20179	0.62606	0.64719	1	13896	1	-0.20179
NAA10	6	0.0021617	0.008584	0.480975	385	5	-1.1503	0.99178	0.99177	1	21328	0	-1.1503
ZG16B	6	0.0021756	0.0086302	0.480975	386	4	-0.52827	0.78532	0.78523	1	16767	0	-0.52827
CDC23	6	0.0021804	0.0086485	0.480975	387	4	-0.82807	0.98818	0.98817	1	21230	0	-0.82807
hsa-mir-3942	3	0.0021837	0.0086603	0.480975	388	3	-0.75507	0.99782	0.99783	1	21532	0	-0.75507
LOC643355	6	0.002195	0.0087051	0.480975	390	3	-0.30584	0.20651	0.32205	1	6938	2	-0.30584
CPSF3L	6	0.0022024	0.0087348	0.480975	391	4	-0.62786	0.80795	0.8079	1	17264	0	-0.62786
SORT1	6	0.0022035	0.0087408	0.480975	392	3	-0.31288	0.79452	0.79449	1	16967	0	-0.31288
ASB16	6	0.0022057	0.0087481	0.480975	393	4	-0.62264	0.32759	0.44513	1	9569	1	-0.62264
URI1	6	0.0022314	0.0088395	0.483561	396	4	-0.95444	0.47159	0.54793	1	11824	1	-0.95444
CAPN15	6	0.002266	0.0089592	0.487873	397	3	-0.29661	0.7051	0.70975	1	15183	1	-0.29661
NDUFV1	6	0.0022674	0.0089634	0.487873	398	2	-0.1455	0.51922	0.57607	1	12402	1	-0.1455
ZNRF3	6	0.0023034	0.0091037	0.489362	403	2	0.36427	0.039419	0.095405	0.970211	2130	3	0.36427
LAS1L	6	0.0022844	0.0090255	0.489362	399	4	-0.86231	0.99932	0.9993	1	21608	0	-0.86231
BAGE2	4	0.002289	0.0090433	0.489362	400	2	-0.38317	0.97874	0.97869	1	20977	0	-0.38317
MLLT11	6	0.0023025	0.0091005	0.489362	401	4	-0.54559	0.99517	0.9952	1	21431	0	-0.54559
SPSB3	6	0.0023031	0.0091028	0.489362	402	4	-0.49714	0.99375	0.99373	1	21389	0	-0.49714
hsa-mir-6817	4	0.0023139	0.0091471	0.490479	404	3	-0.84491	0.96235	0.9623	1	20607	0	-0.84491
SIN3B	6	0.0023333	0.0092125	0.491267	405	4	-1.1369	0.56317	0.60377	1	12994	1	-1.1369
COPS3	6	0.0023374	0.0092239	0.491267	406	3	-0.55405	0.15354	0.26617	1	5724	2	-0.55405
OSTC	5	0.0023403	0.0092298	0.491267	407	3	-0.52647	0.95135	0.95134	1	20373	0	-0.52647
EML4	6	0.0023517	0.0092705	0.492222	408	4	-0.71441	0.99102	0.99101	1	21303	0	-0.71441
PROX1	6	0.0023619	0.009308	0.492405	409	3	-0.35523	0.59209	0.62317	1	13401	1	-0.35523
ARPC5L	6	0.0023644	0.0093194	0.492405	410	4	-0.70081	0.62375	0.64554	1	13856	1	-0.70081
LSM2	6	0.0023754	0.0093651	0.492923	411	3	-0.76572	0.11099	0.21789	1	4714	1	-0.76572
KCNK4	6	0.0023776	0.0093747	0.492923	412	3	-0.48176	0.50787	0.56918	1	12276	1	-0.48176
NAA38	6	0.0023894	0.0094131	0.493743	413	4	-0.67678	0.54947	0.59498	1	12806	1	-0.67678
AP2S1	6	0.0024733	0.0096969	0.507402	414	4	-0.54831	0.90696	0.90682	1	19390	0	-0.54831
GPRIN2	6	0.002488	0.009739	0.508374	415	4	-0.66628	0.26535	0.38154	1	8199	1	-0.66628
RAPGEF2	6	0.0025092	0.0098002	0.510341	416	4	-0.92193	0.70369	0.70848	1	15157	1	-0.92193
INTS2	6	0.0025337	0.009877	0.513106	417	4	-0.5956	0.99683	0.99687	1	21488	0	-0.5956
SMYD1	6	0.0025587	0.0099419	0.514674	418	4	-0.79154	0.9106	0.91051	1	19458	0	-0.79154
PPP2R3B_X	6	0.0025628	0.0099547	0.514674	419	3	-0.14497	0.79195	0.79198	1	16920	0	-0.14497
MNT	6	0.0025723	0.0099899	0.514887	420	2	-0.09438	0.77197	0.77198	1	16479	0	-0.09438
MED30	6	0.0025783	0.010006	0.514887	421	4	-0.82321	0.17782	0.29187	1	6260	1	-0.82321
GAGE2A	2	0.0026184	0.010111	0.518936	422	1	-1.6961	0.87452	0.87456	1	18666	0	-1.6961
EEF1G	6	0.0026254	0.010133	0.518936	423	3	-0.57521	0.99899	0.99899	1	21582	0	-0.57521
LEO1	6	0.0026457	0.010192	0.519522	424	3	-0.4817	0.37939	0.49847	1	10728	1	-0.4817
APBB3	6	0.0026461	0.010192	0.519522	425	4	-0.60178	0.97292	0.97285	1	20837	0	-0.60178
CLNS1A	6	0.0026759	0.010287	0.523091	426	4	-0.59896	0.19449	0.30955	1	6652	1	-0.59896
GTF3C1	6	0.0026856	0.010312	0.523141	427	3	-0.79275	0.18454	0.29894	1	6416	1	-0.79275
MSI1	6	0.0027039	0.010364	0.524579	428	4	-0.65061	0.88833	0.8882	1	18975	0	-0.65061
ZNF776	6	0.0027235	0.010419	0.524879	430	2	0.51356	0.016237	0.047825	0.918842	1125	2	0.51356
PDILT	6	0.0027152	0.010399	0.524879	429	4	-0.65159	0.7319	0.73351	1	15691	1	-0.65159
PARPBP	6	0.0027372	0.010458	0.525637	431	4	-0.69064	0.66636	0.67784	1	14521	1	-0.69064
ATP6V1B2	6	0.0027528	0.010502	0.52662	432	4	-0.69756	0.9899	0.98992	1	21266	0	-0.69756
MED14	6	0.0028036	0.010652	0.532927	433	4	-1.5445	0.99366	0.99365	1	21388	0	-1.5445
SLC29A2	6	0.002821	0.010707	0.534414	434	4	-0.95672	0.38635	0.50201	1	10798	1	-0.95672
AKIRIN2	6	0.0028454	0.010781	0.536459	435	3	0.39534	0.022098	0.062925	0.929832	1466	3	0.39534
CLDND2	6	0.0028499	0.010797	0.536459	436	4	-0.56424	0.46491	0.54411	1	11727	1	-0.56424
NUP85	6	0.0028779	0.010871	0.538879	437	4	-0.88087	0.43989	0.53022	1	11411	1	-0.88087
KMT2B	6	0.0029158	0.010996	0.542572	438	3	-0.61056	0.5627	0.60346	1	12988	1	-0.61056
HFM1	6	0.0029185	0.011005	0.542572	439	4	-1.207	0.44091	0.5308	1	11423	1	-1.207
ACER2	6	0.0029326	0.011044	0.542572	440	2	-0.04378	0.25757	0.37368	1	8037	2	-0.04378
APC	6	0.0029346	0.01105	0.542572	441	3	-0.14544	0.18225	0.29655	1	6363	2	-0.14544
SLC2A14	6	0.0029423	0.01107	0.542572	442	4	-0.77172	0.98908	0.98908	1	21244	0	-0.77172
GSTM2	5	0.002954	0.011111	0.543359	443	4	-0.56986	0.10233	0.20359	0.997867	4418	1	-0.56986
ATP5I	6	0.0030077	0.011271	0.543456	448	4	-1.3882	0.0015811	0.0063833	0.754555	173	1	-1.3882
ILF2	5	0.0029708	0.011167	0.543456	444	3	-0.65877	0.26468	0.38083	1	8185	1	-0.65877
RPRD2	6	0.0029866	0.011213	0.543456	445	4	-0.60815	0.99729	0.99733	1	21511	0	-0.60815
TUBB	6	0.003004	0.011262	0.543456	446	2	-0.24687	0.94161	0.94159	1	20153	0	-0.24687
TMEM204	6	0.0030062	0.011266	0.543456	447	4	-0.53521	0.90386	0.90375	1	19313	0	-0.53521
MEFV	6	0.0030178	0.011303	0.543456	449	3	-0.30994	0.21388	0.32941	1	7109	1	-0.30994
EXOC5	4	0.0030268	0.011329	0.543456	450	1	0.22263	0.5881	0.62041	1	13341	1	0.22263
SLC25A28	6	0.0030383	0.011358	0.543456	451	3	-0.49768	0.42425	0.52181	1	11234	1	-0.49768
METTL5	6	0.0030466	0.011387	0.543456	452	4	-0.59473	0.26656	0.38275	1	8221	2	-0.59473
RNFT1	6	0.0030504	0.011396	0.543456	453	4	-0.62136	0.22609	0.34177	1	7356	1	-0.62136
NonTargetingControlGuideForHuman_0785	1	0.0030512	0.011398	0.543456	454	1	-1.0812	0.99695	0.997	1	21492	0	-1.0812
IL6R	6	0.0030573	0.011414	0.543456	455	4	-0.4588	0.99982	0.99982	1	21636	0	-0.4588
RARA	6	0.0030728	0.011462	0.54409	456	2	-0.12369	0.4337	0.52685	1	11342	1	-0.12369
SLIT1	6	0.0030849	0.011497	0.54409	457	2	-0.15353	0.7256	0.72786	1	15574	1	-0.15353
SARNP	6	0.0030862	0.011503	0.54409	458	4	-0.897	0.99205	0.99203	1	21338	0	-0.897
NDFIP2	6	0.0031067	0.011565	0.545491	459	4	-0.43093	0.74912	0.74952	1	16028	1	-0.43093
SART1	6	0.0031141	0.011583	0.545491	460	4	-1.0116	0.34501	0.46305	1	9955	1	-1.0116
SEC62	6	0.0031283	0.011618	0.54594	461	2	-0.15804	0.78563	0.78554	1	16774	0	-0.15804
HOXD1	6	0.0031771	0.01175	0.54861	463	4	-0.69919	0.10606	0.20975	0.998892	4539	2	-0.69919
hsa-mir-5586	4	0.0031661	0.011724	0.54861	462	2	-1.7627	0.9713	0.97121	1	20803	0	-1.7627
TNFAIP8L3	6	0.0031906	0.011788	0.54861	464	3	-0.46901	0.76996	0.76998	1	16448	0	-0.46901
SEBOX	6	0.0031949	0.011799	0.54861	465	3	-0.88734	0.60848	0.63462	1	13625	1	-0.88734
MLL2	2	0.0032035	0.011822	0.54861	466	2	-1.8858	0.98853	0.9885	1	21234	0	-1.8858
NYX	6	0.003216	0.011867	0.54861	467	3	-0.37407	0.23015	0.3459	1	7438	2	-0.37407
TMEM215	6	0.0032191	0.011878	0.54861	468	3	-0.44881	0.39901	0.50857	1	10941	1	-0.44881
ATXN2L	6	0.0032218	0.011888	0.54861	469	4	-0.64424	0.88814	0.888	1	18971	0	-0.64424
SARS2	6	0.0032263	0.011903	0.54861	470	4	-1.1614	0.76087	0.76085	1	16264	1	-1.1614
CBLL1	6	0.0032352	0.011933	0.548853	471	2	0.074913	0.027136	0.072616	0.951642	1649	2	0.074913
ZNF587	4	0.0032675	0.012027	0.552012	472	2	-0.93454	0.61311	0.63792	1	13692	1	-0.93454
hsa-mir-6511a-1	4	0.0032941	0.012106	0.55296	473	2	-0.46437	0.96558	0.96554	1	20674	0	-0.46437
BAZ2A	6	0.0033055	0.012137	0.55296	474	4	-0.68892	0.65741	0.67092	1	14371	1	-0.68892
ZNF747	6	0.0033121	0.012159	0.55296	475	3	-0.53562	0.94457	0.94456	1	20222	0	-0.53562
PRPF8	6	0.0033222	0.012202	0.55296	476	4	-0.76883	0.99787	0.9979	1	21533	0	-0.76883
hsa-mir-191	4	0.0033275	0.012215	0.55296	477	1	-0.80927	0.3921	0.50498	1	10867	1	-0.80927
EFNA1	6	0.0033354	0.012237	0.55296	478	2	-0.15531	0.79505	0.79501	1	16978	0	-0.15531
FLYWCH1	6	0.0033377	0.012246	0.55296	479	4	-1.0002	0.85054	0.85067	1	18177	0	-1.0002
MRPL22	6	0.0033408	0.012252	0.55296	480	4	-0.76284	0.72337	0.72589	1	15524	1	-0.76284
ATP6V0D1	6	0.0033672	0.012328	0.55506	481	4	-1.208	0.76553	0.76557	1	16362	0	-1.208
SAMM50	6	0.0033849	0.012375	0.55506	482	3	-0.24919	0.69254	0.69901	1	14954	1	-0.24919
PSTK	6	0.0033854	0.012376	0.55506	483	3	-0.50999	0.73206	0.73366	1	15697	1	-0.50999
ACTR2	6	0.0034145	0.012456	0.555344	484	3	-0.79224	0.98083	0.9808	1	21026	0	-0.79224
SUDS3	6	0.0034168	0.012461	0.555344	485	4	-0.88216	0.69305	0.69942	1	14968	1	-0.88216
EIF4G2	6	0.0034204	0.012471	0.555344	486	3	-0.9471	0.99518	0.99522	1	21432	0	-0.9471
TVP23B	6	0.0034355	0.012509	0.555344	487	2	-0.28784	0.73791	0.73898	1	15812	1	-0.28784
SWSAP1	6	0.003456	0.012561	0.555344	488	4	-0.86213	0.87582	0.87584	1	18688	0	-0.86213
RPL5	6	0.0034599	0.01257	0.555344	489	4	-1.6593	0.93767	0.93762	1	20072	0	-1.6593
RAE1	6	0.0034788	0.012632	0.555344	490	2	-0.82703	0.68657	0.69409	1	14855	1	-0.82703
SYN1	6	0.0034827	0.012641	0.555344	491	3	-0.63912	0.96792	0.9679	1	20730	0	-0.63912
UBE3D	6	0.0034856	0.012651	0.555344	492	3	-0.43729	0.92133	0.92126	1	19704	0	-0.43729
TM2D2	6	0.0034861	0.012652	0.555344	493	3	-0.47955	0.78465	0.78456	1	16755	0	-0.47955
AMDHD2	6	0.0034935	0.012672	0.555344	494	3	-0.17547	0.27881	0.39531	1	8489	1	-0.17547
AP2M1	6	0.0035032	0.01271	0.555344	495	4	-1.1273	0.99846	0.99848	1	21551	0	-1.1273
MPZL1	6	0.0035048	0.012715	0.555344	496	4	-0.45449	0.94788	0.9479	1	20296	0	-0.45449
SF3A2	6	0.0035142	0.01275	0.555373	497	4	-0.72958	0.96978	0.96967	1	20770	0	-0.72958
IFIT1B	6	0.003534	0.012811	0.555373	498	2	0.0045237	0.83901	0.83909	1	17910	0	0.0045237
S100B	6	0.0035397	0.012832	0.555373	499	4	-0.84309	0.95995	0.95998	1	20546	0	-0.84309
FAM187B	6	0.0035448	0.012845	0.555373	500	4	-0.85651	0.69001	0.6969	1	14920	1	-0.85651
SYVN1	6	0.0035456	0.012849	0.555373	501	4	-0.88089	0.94427	0.94426	1	20212	0	-0.88089
USP22	6	0.0035532	0.01287	0.555373	502	4	-0.58226	0.63508	0.65382	1	14033	1	-0.58226
ATAD3A	6	0.0035782	0.012943	0.557176	503	4	-0.63875	0.9997	0.99969	1	21632	0	-0.63875
SPEM1	6	0.0035858	0.012963	0.557176	504	2	-0.32751	0.94828	0.94828	1	20304	0	-0.32751
LOR	6	0.0036075	0.013026	0.558759	505	4	-0.46321	0.22483	0.34052	1	7332	1	-0.46321
MGEA5	6	0.0036343	0.013097	0.560727	506	4	-0.52875	0.93805	0.93801	1	20082	0	-0.52875
hsa-mir-621	4	0.0036884	0.01325	0.561891	509	2	-0.70889	0.1004	0.20041	0.997867	4349	1	-0.70889
hsa-mir-3934	4	0.0036553	0.013169	0.561891	507	3	-0.60358	0.13253	0.2438	1	5259	1	-0.60358
TAF10	6	0.0036859	0.013244	0.561891	508	2	-0.14855	0.42631	0.52293	1	11249	1	-0.14855
KRTAP20-3	6	0.0037148	0.013324	0.561891	510	4	-0.74369	0.99864	0.99865	1	21562	0	-0.74369
NMRAL1	6	0.0037157	0.013328	0.561891	511	4	-0.55547	0.45714	0.53973	1	11624	1	-0.55547
LCA5L	6	0.0037193	0.013335	0.561891	512	4	-0.74582	0.75266	0.75294	1	16099	1	-0.74582
MRPL38	6	0.0037222	0.013341	0.561891	513	3	-0.60191	0.98758	0.98754	1	21216	0	-0.60191
VPS45	6	0.0037325	0.013372	0.561891	514	3	-0.46356	0.63142	0.65112	1	13976	1	-0.46356
ATP6V0B	6	0.003736	0.013378	0.561891	515	2	-0.69335	0.72798	0.72995	1	15614	1	-0.69335
KNOP1	6	0.0037378	0.013384	0.561891	516	4	-0.74281	0.96105	0.96104	1	20573	0	-0.74281
VSX2	6	0.0037536	0.013426	0.562283	517	3	-0.26958	0.8043	0.80428	1	17179	0	-0.26958
C11orf53	6	0.0037596	0.013445	0.562283	518	3	-0.27147	0.72376	0.72624	1	15534	1	-0.27147
ZNF483	6	0.0037972	0.013552	0.563473	521	3	-0.36983	0.063369	0.13781	0.975881	3056	2	-0.36983
GTF2H4	6	0.0037934	0.01354	0.563473	519	3	-0.33523	0.58589	0.61888	1	13309	1	-0.33523
CWC15	6	0.0037957	0.013548	0.563473	520	3	-1.3286	0.7085	0.71268	1	15239	1	-1.3286
NPY2R	6	0.0038356	0.013659	0.565215	523	2	-0.071337	0.041836	0.099807	0.97157	2220	2	-0.071337
NELFB	6	0.0038299	0.013644	0.565215	522	4	-0.934	0.97976	0.97973	1	21000	0	-0.934
KRTAP1-4	6	0.0038425	0.013682	0.565215	524	4	-0.48299	0.90307	0.90295	1	19298	0	-0.48299
TBC1D10A	6	0.0038471	0.013698	0.565215	525	2	-0.23342	0.97665	0.97662	1	20928	0	-0.23342
GLMN	6	0.0038586	0.013727	0.565326	526	3	-0.37622	0.91738	0.91737	1	19610	0	-0.37622
ACTR3B	6	0.0038862	0.013806	0.566447	528	1	-0.059962	0.086718	0.17749	0.993529	3869	2	-0.059962
C6orf70	6	0.0038854	0.013804	0.566447	527	3	-0.5328	0.95608	0.95603	1	20466	0	-0.5328
BECN1	6	0.0039362	0.013953	0.571184	529	3	-0.1215	0.84133	0.84142	1	17961	0	-0.1215
RANGAP1	6	0.0039439	0.013974	0.571184	530	3	-0.38122	0.47723	0.55121	1	11896	1	-0.38122
hsa-mir-4514	4	0.0039677	0.014039	0.572756	531	2	0.3583	0.10005	0.19987	0.997867	4335	2	0.3583
ZNF645	6	0.003991	0.014105	0.57436	532	4	-0.5439	0.9992	0.99918	1	21597	0	-0.5439
PRR14	6	0.0040327	0.01423	0.578035	533	3	-0.52256	0.92144	0.92135	1	19709	0	-0.52256
ADAM28	6	0.0040432	0.014262	0.578035	534	4	-0.44478	0.57458	0.61124	1	13150	1	-0.44478
TUFT1	6	0.0040497	0.014281	0.578035	535	2	-0.12034	0.7888	0.78882	1	16848	0	-0.12034
CNGA1	6	0.0040579	0.014302	0.578035	536	4	-0.71074	0.3668	0.48574	1	10446	1	-0.71074
VSX1	6	0.0040864	0.014389	0.579639	537	3	-0.018432	0.12037	0.23102	1	4977	2	-0.018432
NARS2	6	0.0040942	0.014413	0.579639	538	4	-0.92444	0.71268	0.71635	1	15318	1	-0.92444
TCEB3C	6	0.0040989	0.014423	0.579639	539	3	-0.28008	0.37438	0.49354	1	10618	1	-0.28008
OR4F16	6	0.0041073	0.014449	0.579639	540	4	-0.49488	0.98969	0.98969	1	21256	0	-0.49488
DCTN2	6	0.0041329	0.014523	0.581532	541	2	-0.31626	0.65362	0.66791	1	14309	1	-0.31626
ZNF688	6	0.0041463	0.014564	0.582085	542	4	-0.41969	0.45687	0.53958	1	11619	1	-0.41969
hsa-mir-500b	3	0.0041755	0.014657	0.584733	543	1	-0.34062	0.4729	0.54868	1	11836	1	-0.34062
MRPL53	6	0.004225	0.014801	0.585566	545	2	0.30021	0.011652	0.035502	0.87963	867	2	0.30021
NARS	6	0.004206	0.014749	0.585566	544	3	-0.86817	0.82857	0.82856	1	17696	0	-0.86817
SEC14L5	6	0.0042318	0.014822	0.585566	546	4	-0.69185	0.78711	0.78708	1	16805	0	-0.69185
ZNF330	6	0.0042411	0.014845	0.585566	547	3	-0.42673	0.8293	0.82927	1	17708	0	-0.42673
ZCCHC9	6	0.0042491	0.014873	0.585566	548	3	-0.43672	0.94108	0.94103	1	20140	0	-0.43672
GTF3C6	6	0.0042496	0.014875	0.585566	549	3	-0.68555	0.99621	0.99626	1	21459	0	-0.68555
NUCB2	6	0.0042532	0.014886	0.585566	550	2	-0.35626	0.29757	0.41431	1	8917	2	-0.35626
HMGCS1	6	0.0042572	0.014899	0.585566	551	3	-0.40855	0.63679	0.65511	1	14060	1	-0.40855
RPAP1	6	0.0042653	0.014921	0.585566	552	2	0.17614	0.46515	0.54425	1	11734	1	0.17614
hsa-mir-1273f	4	0.0042879	0.014986	0.58705	553	2	-0.77499	0.15583	0.26858	1	5774	1	-0.77499
SMIM3	6	0.0042971	0.015014	0.58708	554	4	-0.53929	0.94126	0.94124	1	20147	0	-0.53929
DNAH6	6	0.004346	0.015143	0.587893	558	3	-0.4741	0.091551	0.18553	0.995323	4021	1	-0.4741
MSR1	6	0.0043263	0.015095	0.587893	555	4	-0.70833	0.99704	0.9971	1	21498	0	-0.70833
S100A1	6	0.0043378	0.015124	0.587893	556	4	-0.68844	0.99244	0.99242	1	21352	0	-0.68844
GDPD3	6	0.0043424	0.015133	0.587893	557	3	-0.38749	0.68686	0.69433	1	14864	1	-0.38749
TUT1	6	0.004365	0.015197	0.588096	559	4	-0.73186	0.71026	0.7142	1	15272	1	-0.73186
FNDC3B	6	0.0043669	0.015203	0.588096	560	4	-0.88423	0.17518	0.289	1	6203	1	-0.88423
PTPLB	6	0.0043849	0.015251	0.588096	561	4	-0.55333	0.84206	0.84215	1	17975	0	-0.55333
CSDE1	6	0.0043867	0.015257	0.588096	562	1	-0.12766	0.37709	0.49637	1	10689	1	-0.12766
ATPAF2	6	0.004483	0.015541	0.597972	563	4	-0.9078	0.99425	0.99427	1	21401	0	-0.9078
OVCH1	6	0.0045275	0.015655	0.600464	564	4	-0.72852	0.17003	0.28356	1	6069	1	-0.72852
LCTL	6	0.0045296	0.015661	0.600464	565	4	-0.66872	0.96854	0.96848	1	20745	0	-0.66872
PCF11	6	0.0045682	0.015769	0.602174	566	3	-0.62161	0.96817	0.96812	1	20738	0	-0.62161
OTOP1	6	0.0045683	0.015769	0.602174	567	4	-0.63393	0.99648	0.99651	1	21473	0	-0.63393
SPRY2	6	0.0045734	0.015789	0.602174	568	4	-0.74537	0.97314	0.97307	1	20845	0	-0.74537
CPSF4	6	0.0046073	0.015882	0.603934	569	3	-0.79754	0.4653	0.54433	1	11737	1	-0.79754
AKAP2	6	0.0046104	0.015891	0.603934	570	4	-0.74752	0.18161	0.29586	1	6348	1	-0.74752
SREBF1	6	0.0046295	0.015945	0.604923	571	3	-0.43202	0.89658	0.89645	1	19165	0	-0.43202
RBM17	6	0.0046415	0.015985	0.605388	572	3	-0.54032	0.21298	0.32853	1	7082	2	-0.54032
SDC4	6	0.0046569	0.01603	0.606025	573	4	-0.70866	0.68535	0.6931	1	14833	1	-0.70866
HMOX2	6	0.0046828	0.016103	0.606793	574	2	-0.13221	0.51846	0.57561	1	12391	1	-0.13221
PHC3	6	0.0046839	0.016106	0.606793	575	4	-0.59885	0.895	0.89485	1	19127	0	-0.59885
DECR2	6	0.0046985	0.016147	0.607287	576	4	-0.53361	0.00903	0.028265	0.873288	696	2	-0.53361
STXBP3	6	0.0047294	0.016233	0.609228	577	2	-0.59581	0.23244	0.34827	1	7498	1	-0.59581
CACNA1F	6	0.0047369	0.016255	0.609228	578	3	-0.56316	0.96019	0.96021	1	20553	0	-0.56316
DHX29	6	0.0048281	0.016516	0.61783	579	4	-0.83701	0.86622	0.86631	1	18500	0	-0.83701
SEC31A	6	0.004836	0.016542	0.61783	580	4	-0.7691	0.84667	0.84676	1	18093	0	-0.7691
GJA8	6	0.0048558	0.016599	0.618531	581	4	-0.59035	0.87865	0.87857	1	18756	0	-0.59035
BACH2	6	0.0048619	0.016618	0.618531	582	2	-0.23369	0.66626	0.67775	1	14520	1	-0.23369
ZNF597	6	0.0048921	0.016708	0.620833	583	3	-0.33806	0.92258	0.92251	1	19736	0	-0.33806
2018-03-09	6	0.0049173	0.016783	0.621372	584	3	-0.37164	0.050462	0.11517	0.974908	2552	2	-0.37164
MED27	6	0.0049191	0.016789	0.621372	585	3	-0.52971	0.32846	0.44601	1	9590	1	-0.52971
CNPPD1	6	0.004928	0.016809	0.621372	586	3	-0.33884	0.41258	0.51565	1	11095	1	-0.33884
WISP3	6	0.0049472	0.016866	0.621498	587	4	-0.63988	0.8839	0.88374	1	18888	0	-0.63988
CHD4	6	0.0049483	0.016869	0.621498	588	2	-0.014095	0.23782	0.35367	1	7611	2	-0.014095
hsa-mir-2053	4	0.0050631	0.017182	0.625794	591	1	1.124	0.0067338	0.021823	0.852521	553	2	1.124
SRGAP2D	6	0.0050157	0.017049	0.625794	589	3	-0.44153	0.98376	0.98374	1	21098	0	-0.44153
PDGFA	6	0.0050445	0.017128	0.625794	590	3	-0.43559	0.604	0.63145	1	13570	1	-0.43559
OR2B11	6	0.005068	0.017196	0.625794	592	3	-0.9167	0.94428	0.94426	1	20213	0	-0.9167
MED9	6	0.0050704	0.017203	0.625794	593	3	-0.1032	0.60254	0.6304	1	13550	1	-0.1032
PIGQ	6	0.0050748	0.017215	0.625794	594	3	-0.34019	0.96524	0.9652	1	20667	0	-0.34019
LOC100506388	6	0.0050825	0.017234	0.625794	595	3	-0.44887	0.83253	0.83256	1	17770	0	-0.44887
ID1	6	0.0050862	0.017244	0.625794	596	3	-0.60683	0.38902	0.5034	1	10823	1	-0.60683
C3orf58	6	0.0050871	0.017246	0.625794	597	2	-0.12257	0.75742	0.75749	1	16198	1	-0.12257
EMC2	6	0.0051015	0.017289	0.62632	598	4	-0.98404	0.98483	0.98477	1	21133	0	-0.98404
NT5M	6	0.0051226	0.017356	0.627547	599	4	-0.57163	0.98106	0.98102	1	21033	0	-0.57163
TMEM212	6	0.0051415	0.017418	0.627547	600	4	-0.57432	0.96675	0.96671	1	20694	0	-0.57432
CEBPA	6	0.0051453	0.017429	0.627547	601	3	-1.7869	0.99702	0.99708	1	21496	0	-1.7869
DGCR2	6	0.005157	0.017463	0.627547	602	4	-0.53958	0.99812	0.99815	1	21540	0	-0.53958
DNAJC13	6	0.0051591	0.017468	0.627547	603	3	-0.45734	0.6524	0.66695	1	14294	1	-0.45734
hsa-mir-143	4	0.0052138	0.017625	0.632131	604	3	-0.75717	0.97658	0.97654	1	20927	0	-0.75717
PYCARD	6	0.0052288	0.017671	0.632722	605	4	-0.56828	0.20687	0.32242	1	6944	1	-0.56828
MZF1	6	0.0052524	0.017735	0.633982	606	4	-0.75386	0.45997	0.5413	1	11663	1	-0.75386
WNT10A	6	0.0052785	0.017809	0.635596	607	4	-0.40663	0.7515	0.75179	1	16073	1	-0.40663
PPP1R3G	6	0.0053114	0.0179	0.637791	608	4	-0.83685	0.93623	0.93621	1	20042	0	-0.83685
TCOF1	6	0.0053342	0.017962	0.638492	609	4	-0.56024	0.8382	0.8383	1	17893	0	-0.56024
SNAP23	6	0.0053425	0.017979	0.638492	610	3	-0.47356	0.76142	0.7614	1	16277	1	-0.47356
CRIPT	6	0.005355	0.018013	0.638662	611	2	0.11301	0.19441	0.30946	1	6651	1	0.11301
UBXN2B	6	0.0053823	0.018095	0.640014	612	4	-0.91484	0.94527	0.94527	1	20238	0	-0.91484
CDC5L	6	0.0053969	0.018139	0.640014	613	3	-0.69186	0.16109	0.27411	1	5882	1	-0.69186
NUP88	6	0.0054008	0.01815	0.640014	614	4	-0.56294	0.9141	0.91404	1	19526	0	-0.56294
DOLPP1	6	0.0054101	0.01817	0.640014	615	3	-0.47376	0.92929	0.9292	1	19882	0	-0.47376
HSBP1	6	0.0054371	0.018247	0.641708	616	1	0.25867	0.41922	0.51912	1	11176	1	0.25867
PDE11A	6	0.0054499	0.018286	0.642016	617	3	-0.61697	0.79088	0.7909	1	16890	0	-0.61697
BHLHA9	6	0.0054842	0.018383	0.64366	618	4	-0.60398	0.013211	0.039731	0.883159	973	1	-0.60398
MARCKS	6	0.0054871	0.018392	0.64366	619	3	-0.41229	0.95701	0.95698	1	20487	0	-0.41229
hsa-mir-4715	4	0.0054967	0.018425	0.64378	620	1	0.19768	0.73988	0.7408	1	15847	0	0.19768
COG7	6	0.0055371	0.018528	0.646179	621	4	-0.80257	0.99267	0.99265	1	21355	0	-0.80257
LRRC55	6	0.0055528	0.018576	0.646179	622	3	-0.81894	0.87654	0.87655	1	18702	0	-0.81894
EXOSC4	6	0.0055556	0.018583	0.646179	623	4	-0.72458	0.34009	0.45797	1	9850	1	-0.72458
BCKDK	6	0.0055961	0.018698	0.648895	624	3	-0.39435	0.96943	0.96934	1	20763	0	-0.39435
LCE1A	6	0.0056051	0.018721	0.648895	625	4	-0.85196	0.99073	0.99073	1	21293	0	-0.85196
ITGAL	6	0.0056237	0.018771	0.649582	626	3	-0.57357	0.55893	0.60106	1	12933	1	-0.57357
HSPE1-MOB4	5	0.0056708	0.0189	0.653015	627	3	-0.482	0.99523	0.99526	1	21435	0	-0.482
SCNM1	6	0.0057581	0.019153	0.653381	633	4	-0.5184	0.018712	0.054351	0.923377	1268	1	-0.5184
PCSK1N	6	0.0056871	0.018949	0.653381	628	2	0.34949	0.067758	0.14536	0.97915	3216	3	0.34949
TMED2	6	0.0057135	0.019024	0.653381	629	4	-1.0167	0.4264	0.52298	1	11251	1	-1.0167
TBL3	6	0.0057209	0.019046	0.653381	630	3	-0.45508	0.94728	0.94729	1	20283	0	-0.45508
ZNF48	6	0.0057348	0.019086	0.653381	631	4	-0.73667	0.60606	0.63292	1	13594	1	-0.73667
hsa-mir-4497	4	0.0057532	0.019139	0.653381	632	3	-0.7196	0.92087	0.92081	1	19685	0	-0.7196
CRLF1	6	0.0057676	0.01918	0.653381	634	4	-0.50095	0.98883	0.98882	1	21239	0	-0.50095
EHBP1	6	0.00577	0.019185	0.653381	635	4	-0.50255	0.79562	0.79558	1	16985	0	-0.50255
CHN1	6	0.0057954	0.019249	0.653381	636	4	-0.69202	0.99624	0.99629	1	21460	0	-0.69202
PANX1	6	0.0057979	0.019256	0.653381	637	4	-0.65339	0.73304	0.73455	1	15715	1	-0.65339
AIFM2	6	0.0058149	0.019314	0.653381	638	4	-0.58275	0.28619	0.40278	1	8646	1	-0.58275
GRPEL1	6	0.0058282	0.019356	0.653381	639	3	-0.51463	0.94344	0.94339	1	20198	0	-0.51463
RAD52	6	0.0058294	0.019359	0.653381	640	4	-0.73776	0.73801	0.73907	1	15814	1	-0.73776
PQLC1	6	0.005837	0.019376	0.653381	641	2	-0.35019	0.98891	0.98891	1	21241	0	-0.35019
NPIPA5	2	0.0058417	0.019387	0.653381	642	2	-1.35	0.99416	0.99416	1	21398	0	-1.35
DYNC1I2	6	0.0058428	0.019394	0.653381	643	4	-0.79075	0.99434	0.99437	1	21406	0	-0.79075
RASA4	6	0.0058721	0.01947	0.653748	644	4	-0.567	0.97298	0.97291	1	20838	0	-0.567
DNAH3	6	0.0058795	0.019495	0.653748	645	4	-0.44979	0.29813	0.41487	1	8930	1	-0.44979
C10orf12	6	0.0058819	0.019502	0.653748	646	4	-0.4676	0.93414	0.93415	1	20002	0	-0.4676
PDE4DIP	6	0.005889	0.019525	0.653748	647	4	-0.83742	0.41631	0.5176	1	11142	1	-0.83742
E4F1	6	0.0059433	0.019695	0.658408	648	4	-0.81317	0.97083	0.97073	1	20790	0	-0.81317
CD68	6	0.0059866	0.019815	0.661391	649	4	-0.51529	0.93109	0.93104	1	19925	0	-0.51529
hsa-mir-181c	4	0.0059992	0.01985	0.661546	650	2	-0.41472	0.3958	0.50688	1	10901	1	-0.41472
hsa-mir-7704	4	0.0060228	0.019918	0.662796	651	3	-0.81518	0.6441	0.66059	1	14175	0	-0.81518
COASY	6	0.0060369	0.019964	0.663313	652	2	0.3016	0.019551	0.056564	0.923377	1320	3	0.3016
ARAF	6	0.0060743	0.020068	0.665739	653	2	-0.27753	0.97783	0.97777	1	20957	0	-0.27753
BAIAP2L1	6	0.0061369	0.020238	0.670368	654	3	-0.14311	0.32187	0.43924	1	9445	1	-0.14311
LRRC52	6	0.0061873	0.020369	0.673668	655	4	-0.42633	0.69402	0.70021	1	14988	1	-0.42633
DGAT2	6	0.0062076	0.020417	0.674226	656	4	-0.44215	0.85166	0.85181	1	18201	0	-0.44215
hsa-mir-501	4	0.0062634	0.02058	0.676915	657	2	-0.58591	0.81318	0.81317	1	17365	0	-0.58591
ADAMTS8	6	0.0062669	0.020591	0.676915	658	2	0.45226	0.14906	0.26134	1	5635	2	0.45226
MZB1	6	0.006274	0.020615	0.676915	659	4	-0.48939	0.20488	0.3204	1	6895	1	-0.48939
VAC14	6	0.0062868	0.020651	0.676915	660	3	-1.1994	0.21446	0.33001	1	7120	1	-1.1994
NDUFS8	6	0.0062881	0.020655	0.676915	661	4	-0.89018	0.99055	0.99056	1	21286	0	-0.89018
UBAP1L	6	0.0063319	0.02078	0.679263	662	4	-0.76874	0.5996	0.62832	1	13508	1	-0.76874
MOSPD3	6	0.0063367	0.020789	0.679263	663	1	-0.18988	0.58405	0.61763	1	13285	1	-0.18988
CHRFAM7A	6	0.0063683	0.020885	0.681372	664	3	-0.46147	0.96716	0.96712	1	20710	0	-0.46147
KANSL1	6	0.0063976	0.020962	0.682759	665	4	-0.6099	0.1018	0.20273	0.997867	4397	1	-0.6099
POMC	6	0.0064083	0.020991	0.682759	666	3	-0.4398	0.77744	0.77741	1	16598	0	-0.4398
ILF3	6	0.0064228	0.021037	0.68325	667	4	-0.8467	0.98282	0.98277	1	21073	0	-0.8467
PCBP1	6	0.0064448	0.021104	0.684391	668	4	-0.82101	0.90005	0.89998	1	19244	0	-0.82101
ZNF808	5	0.0066214	0.021591	0.689093	676	3	-0.9037	0.05378	0.12099	0.975627	2672	1	-0.9037
CCDC86	6	0.0065366	0.021354	0.689093	669	2	0.22866	0.11147	0.21869	1	4734	2	0.22866
HIST2H3A	6	0.006546	0.021378	0.689093	670	4	-0.60016	0.98531	0.98527	1	21146	0	-0.60016
ATP5J2	6	0.0065518	0.021398	0.689093	671	3	-0.91836	0.49069	0.559	1	12055	1	-0.91836
KREMEN2	6	0.0065552	0.021405	0.689093	672	4	-0.64344	0.84236	0.84245	1	17982	0	-0.64344
C19orf25	6	0.0065795	0.021467	0.689093	673	4	-0.51069	0.31414	0.4313	1	9282	2	-0.51069
NKX3-2	6	0.0065957	0.021512	0.689093	674	2	-0.081378	0.92116	0.92109	1	19694	0	-0.081378
MIF4GD	6	0.0066137	0.02157	0.689093	675	3	-0.30745	0.59671	0.62633	1	13461	1	-0.30745
SEPHS2	6	0.0066286	0.021612	0.689093	677	4	-1.0141	0.99782	0.99783	1	21531	0	-1.0141
ATR	6	0.0066308	0.021619	0.689093	678	4	-1.0192	0.89128	0.89112	1	19034	0	-1.0192
BPTF	6	0.0066365	0.021633	0.689093	679	3	-0.50955	0.80802	0.80798	1	17265	0	-0.50955
TRNT1	6	0.0066405	0.021642	0.689093	680	3	-0.86738	0.22735	0.34305	1	7378	1	-0.86738
RPGR	6	0.0066479	0.021662	0.689093	681	3	-0.37558	0.92498	0.9249	1	19794	0	-0.37558
MS4A2	6	0.0066864	0.021768	0.691195	682	3	-0.18003	0.31779	0.43504	1	9362	1	-0.18003
ZNF705D	2	0.006703	0.02181	0.691195	683	2	-0.94143	0.9933	0.99328	1	21378	0	-0.94143
FAM168B	6	0.0067104	0.021824	0.691195	684	3	-0.49994	0.92762	0.92754	1	19850	0	-0.49994
COA4	6	0.0067233	0.021868	0.691559	685	3	-0.49198	0.97573	0.97568	1	20907	0	-0.49198
OR5I1	6	0.0067462	0.021934	0.692644	686	4	-0.41405	0.9018	0.90168	1	19280	0	-0.41405
hsa-mir-4517	4	0.0067886	0.022034	0.694386	687	3	-0.92675	0.98916	0.98916	1	21245	0	-0.92675
DMTF1	6	0.0067976	0.022053	0.694386	688	4	-0.71016	0.97245	0.97238	1	20830	0	-0.71016
GTF3C3	6	0.0068189	0.022104	0.694973	689	3	-0.86508	0.9753	0.97527	1	20899	0	-0.86508
POLR3C	6	0.0068615	0.022238	0.697676	690	3	-0.56536	0.82338	0.82338	1	17610	0	-0.56536
SLX1A	6	0.0068665	0.022254	0.697676	691	3	-0.2679	0.34793	0.46614	1	10014	1	-0.2679
MCM8	6	0.0069109	0.022381	0.699857	692	3	-0.50508	0.55564	0.59898	1	12891	1	-0.50508
DHX40	6	0.0069287	0.022426	0.699857	693	4	-0.55047	0.79276	0.79278	1	16937	0	-0.55047
OR8G1	6	0.0069315	0.022435	0.699857	694	4	-0.43478	0.90006	0.89999	1	19245	0	-0.43478
CCDC93	6	0.0069529	0.022496	0.699857	695	4	-0.78902	0.91586	0.9158	1	19566	0	-0.78902
ISCA2	6	0.0069594	0.022513	0.699857	696	4	-0.94866	0.73934	0.7403	1	15839	1	-0.94866
RPL3	6	0.0069673	0.022534	0.699857	697	4	-1.3977	0.99467	0.99469	1	21418	0	-1.3977
XAGE2	6	0.0069732	0.02255	0.699857	698	4	-0.70026	0.33817	0.45599	1	9797	1	-0.70026
TAMM41	6	0.0070192	0.022691	0.703232	699	3	-0.24866	0.82065	0.82069	1	17550	0	-0.24866
FXR2	6	0.0071638	0.023118	0.712977	700	4	-0.52259	0.99757	0.9976	1	21521	0	-0.52259
MRPS6	6	0.0071689	0.023131	0.712977	701	4	-1.2543	0.63716	0.65537	1	14066	1	-1.2543
COPE	6	0.0071723	0.02314	0.712977	702	4	-0.73618	0.94899	0.94899	1	20319	0	-0.73618
ZNF568	6	0.0071786	0.023165	0.712977	703	3	-0.44515	0.15338	0.26599	1	5720	2	-0.44515
SRSF7	6	0.007185	0.023182	0.712977	704	4	-0.68394	0.79708	0.79706	1	17017	0	-0.68394
NonTargetingControlGuideForHuman_0439	1	0.0071948	0.023203	0.712977	705	1	-0.74008	0.99281	0.99278	1	21361	0	-0.74008
TTC19	6	0.0072457	0.023354	0.716127	706	3	-0.54255	0.41252	0.51561	1	11093	1	-0.54255
COX5A	6	0.0072511	0.023372	0.716127	707	3	-0.40053	0.48811	0.55755	1	12026	1	-0.40053
SULT1A4	4	0.0072961	0.023504	0.719157	708	3	-0.76953	0.18998	0.30472	1	6547	1	-0.76953
ZBTB10	6	0.0075103	0.024078	0.719216	725	4	-0.64161	0.010177	0.031456	0.87963	764	1	-0.64161
SPATC1L	6	0.007538	0.02417	0.719216	728	4	-0.72592	0.014502	0.043192	0.899681	1040	1	-0.72592
SLC5A10	6	0.0075352	0.024162	0.719216	727	3	-0.36229	0.10276	0.2043	0.99858	4428	1	-0.36229
CREB3L4	6	0.0073344	0.023608	0.719216	709	4	-0.4547	0.99425	0.99428	1	21402	0	-0.4547
DUOX1	6	0.0073456	0.023631	0.719216	710	4	-0.6883	0.94754	0.94756	1	20290	0	-0.6883
ASAP2	6	0.0073471	0.023636	0.719216	711	4	-0.71988	0.78074	0.7807	1	16665	0	-0.71988
FOXRED1	6	0.0073501	0.023644	0.719216	712	2	0.30791	0.19788	0.31316	1	6722	1	0.30791
GTF2H5	6	0.0074024	0.023787	0.719216	713	2	-0.045768	0.24348	0.35942	1	7744	2	-0.045768
MAN2B1	6	0.007406	0.023796	0.719216	714	4	-0.56664	0.99508	0.99512	1	21425	0	-0.56664
DDO	6	0.0074444	0.023906	0.719216	715	3	-0.39841	0.23954	0.35538	1	7654	1	-0.39841
GTF2A1	6	0.0074464	0.023913	0.719216	716	4	-0.61437	0.88272	0.88259	1	18867	0	-0.61437
MRPL13	6	0.0074652	0.023965	0.719216	717	3	-0.37365	0.37638	0.49564	1	10668	1	-0.37365
RGS14	6	0.0074725	0.023985	0.719216	718	4	-0.49377	0.86317	0.86328	1	18443	0	-0.49377
RPRD1A	6	0.0074812	0.024004	0.719216	719	4	-0.34291	0.59313	0.62386	1	13416	1	-0.34291
UFSP2	6	0.0074827	0.024009	0.719216	720	4	-0.5663	0.72452	0.72691	1	15549	1	-0.5663
LIN28B	6	0.0074853	0.024015	0.719216	721	2	-0.037028	0.70456	0.70927	1	15174	1	-0.037028
KCNIP3	6	0.0074899	0.024027	0.719216	722	4	-0.62387	0.96778	0.96777	1	20728	0	-0.62387
YPEL3	6	0.0075024	0.024057	0.719216	723	3	-0.48349	0.80848	0.80845	1	17276	0	-0.48349
DFNB59	6	0.007503	0.024058	0.719216	724	4	-0.65442	0.96112	0.96111	1	20576	0	-0.65442
COL1A2	6	0.0075288	0.02414	0.719216	726	4	-0.50379	0.82502	0.82501	1	17644	0	-0.50379
SMPD1	6	0.0075511	0.02421	0.719424	729	4	-0.50219	0.49086	0.5591	1	12059	1	-0.50219
MAP2K3	6	0.0075745	0.024273	0.719425	730	4	-0.6355	0.79483	0.7948	1	16972	0	-0.6355
NonTargetingControlGuideForHuman_0257	1	0.0075799	0.024289	0.719425	731	1	-2.7196	0.99242	0.99241	1	21350	0	-2.7196
KIAA2013	6	0.007587	0.02431	0.719425	732	4	-0.7079	0.80809	0.80805	1	17266	0	-0.7079
FSHB	6	0.0076068	0.02436	0.719942	733	4	-0.56718	0.95545	0.95544	1	20456	0	-0.56718
hsa-mir-6771	4	0.0076416	0.024459	0.721755	734	3	-0.56834	0.86415	0.86425	1	18458	0	-0.56834
KCNS3	6	0.0076509	0.024488	0.721755	735	4	-0.59115	0.18268	0.29699	1	6370	1	-0.59115
ARCN1	6	0.0076881	0.024582	0.722954	736	4	-1.1351	0.92919	0.92911	1	19878	0	-1.1351
TEF	6	0.0076934	0.024596	0.722954	737	2	-0.17471	0.78715	0.78713	1	16807	0	-0.17471
SLC26A10	6	0.007713	0.024656	0.723758	738	4	-0.76517	0.90689	0.90676	1	19387	0	-0.76517
TEX15	6	0.0077358	0.024733	0.72405	739	3	-0.51966	0.99881	0.99881	1	21572	0	-0.51966
GPHN	6	0.0077362	0.024733	0.72405	740	3	-0.46852	0.99847	0.9985	1	21552	0	-0.46852
DERL1	6	0.0077571	0.024799	0.724648	741	3	-1.8492	0.48105	0.55342	1	11949	1	-1.8492
HAPLN4	6	0.0077898	0.024879	0.724648	742	2	-0.26337	0.90655	0.90641	1	19381	0	-0.26337
PPP1R1C	6	0.0077949	0.024896	0.724648	743	3	-0.42493	0.87477	0.87481	1	18672	0	-0.42493
MAP1LC3B2	6	0.0078006	0.024908	0.724648	744	2	0.19057	0.33349	0.45111	1	9696	2	0.19057
FGF2	6	0.0078139	0.024941	0.724648	745	3	-0.55376	0.82028	0.82031	1	17540	0	-0.55376
CCNB3	6	0.0078281	0.024979	0.724648	746	3	-0.38144	0.11612	0.22619	1	4886	1	-0.38144
SLC25A30	6	0.0078328	0.024988	0.724648	747	3	-0.064797	0.46554	0.54448	1	11739	1	-0.064797
DDX23	6	0.007876	0.025107	0.727134	748	3	-0.48129	0.95898	0.959	1	20525	0	-0.48129
TXK	6	0.0079106	0.025221	0.729063	749	4	-0.69327	0.99943	0.99941	1	21615	0	-0.69327
GOLGA3	6	0.0079188	0.025241	0.729063	750	3	-0.13502	0.27612	0.39258	1	8421	1	-0.13502
CMTM4	6	0.0079344	0.02529	0.729503	751	2	-0.11841	0.99077	0.99077	1	21295	0	-0.11841
VPS8	6	0.0079696	0.025385	0.730629	752	4	-0.39773	0.084018	0.17287	0.993072	3760	2	-0.39773
FAM73A	6	0.0079734	0.025396	0.730629	753	2	0.051868	0.34502	0.46306	1	9956	2	0.051868
SNAPIN	6	0.0079932	0.025451	0.731235	754	3	-0.42833	0.87922	0.87914	1	18769	0	-0.42833
CISD2	6	0.0080718	0.025668	0.736496	755	4	-0.48777	0.82469	0.82468	1	17636	0	-0.48777
MED7	6	0.0081042	0.025761	0.736884	756	3	-0.83827	0.99769	0.99771	1	21526	0	-0.83827
HES5	6	0.0081501	0.025876	0.736884	757	4	-0.4408	0.31299	0.43012	1	9261	1	-0.4408
PBXIP1	6	0.0081644	0.025926	0.736884	758	2	-0.30216	0.12967	0.24076	1	5196	1	-0.30216
GCOM1	6	0.0081656	0.025928	0.736884	759	4	-0.52477	0.35183	0.4702	1	10100	1	-0.52477
ASMTL_X	6	0.0081671	0.025936	0.736884	760	4	-0.35688	0.98952	0.98952	1	21251	0	-0.35688
GML	6	0.0081687	0.02594	0.736884	761	4	-0.48389	0.12878	0.23981	1	5170	1	-0.48389
POGZ	6	0.0081699	0.025943	0.736884	762	2	0.1437	0.11012	0.21649	1	4679	1	0.1437
hsa-mir-192	4	0.008195	0.026009	0.736884	763	2	-0.49514	0.54204	0.59029	1	12700	1	-0.49514
MND1	6	0.0082249	0.026095	0.736884	764	3	-0.20412	0.68123	0.68974	1	14753	1	-0.20412
SUGP1	6	0.0082313	0.026112	0.736884	765	3	-0.50786	0.67369	0.68367	1	14642	1	-0.50786
CDH8	6	0.0082386	0.026132	0.736884	766	3	-0.3551	0.21823	0.33376	1	7196	1	-0.3551
LPAR2	6	0.0082477	0.026156	0.736884	767	4	-0.52189	0.21211	0.32767	1	7064	1	-0.52189
NOXO1	6	0.0082539	0.026166	0.736884	768	4	-0.60348	0.7007	0.70591	1	15105	1	-0.60348
RAET1L	6	0.0082607	0.026184	0.736884	769	3	-0.41086	0.73117	0.73285	1	15671	1	-0.41086
HS2ST1	6	0.0082635	0.026192	0.736884	770	2	0.0079563	0.87405	0.87408	1	18657	0	0.0079563
C2orf47	6	0.0083101	0.026314	0.739345	771	4	-0.50751	0.26154	0.37769	1	8127	1	-0.50751
TMEM31	5	0.0083377	0.026397	0.74031	772	4	-0.87608	0.25874	0.37488	1	8073	1	-0.87608
DICER1	6	0.0083643	0.026466	0.74031	773	3	-0.37908	0.14208	0.2539	1	5468	1	-0.37908
TYMP	6	0.0083822	0.026516	0.74031	774	4	-0.41455	0.57814	0.61361	1	13200	1	-0.41455
JAG1	6	0.0083834	0.026517	0.74031	775	4	-0.58344	0.52552	0.57991	1	12483	1	-0.58344
APOL3	6	0.0083841	0.026519	0.74031	776	3	-0.37021	0.29122	0.40786	1	8763	1	-0.37021
LRRK2	6	0.0083965	0.026559	0.740478	777	3	-0.42108	0.43304	0.52651	1	11337	1	-0.42108
UAP1	6	0.008441	0.026677	0.74192	778	4	-0.55203	0.84923	0.84933	1	18140	0	-0.55203
hsa-mir-452	2	0.0084426	0.026679	0.74192	779	2	-0.96961	0.99156	0.99155	1	21321	0	-0.96961
B4GALNT1	6	0.0084579	0.026724	0.742099	780	4	-0.68013	0.9848	0.98474	1	21131	0	-0.68013
ERLIN1	6	0.0084762	0.026773	0.742099	781	3	-0.34311	0.5299	0.5826	1	12533	1	-0.34311
MED18	6	0.0084831	0.026789	0.742099	782	2	-0.37926	0.83529	0.83539	1	17825	0	-0.37926
RFC5	6	0.008515	0.026882	0.743731	783	4	-0.5961	0.99947	0.99946	1	21619	0	-0.5961
TRH	6	0.0086066	0.027136	0.744368	789	3	-0.28824	0.02748	0.073288	0.952468	1666	1	-0.28824
BUD31	6	0.0085413	0.026956	0.744368	784	3	-0.83286	0.61222	0.63728	1	13679	1	-0.83286
FOXC1	6	0.0085644	0.027021	0.744368	785	4	-0.55278	0.17718	0.29117	1	6243	1	-0.55278
SLC6A6	6	0.0085697	0.027037	0.744368	786	4	-0.41464	0.99431	0.99434	1	21404	0	-0.41464
FAM101A	6	0.008574	0.027049	0.744368	787	4	-0.43363	0.6786	0.68757	1	14715	1	-0.43363
hsa-mir-6828	4	0.0085844	0.027081	0.744368	788	2	-0.41583	0.54831	0.59427	1	12793	1	-0.41583
FAM92B	6	0.0086301	0.027199	0.744368	790	4	-0.41878	0.90927	0.90917	1	19430	0	-0.41878
ICMT	6	0.0086327	0.027203	0.744368	791	3	-0.25751	0.84977	0.84991	1	18153	0	-0.25751
CYP4F2	6	0.0086369	0.027214	0.744368	792	3	-0.78429	0.857	0.85713	1	18325	0	-0.78429
DNAH7	6	0.0086541	0.027258	0.744641	793	3	-0.16502	0.46726	0.54546	1	11770	1	-0.16502
MYH9	6	0.0086896	0.027349	0.746184	794	4	-0.4371	0.58944	0.62134	1	13357	1	-0.4371
ERBB3	6	0.0087049	0.027386	0.746254	795	3	-0.096714	0.54514	0.59225	1	12740	1	-0.096714
SNAP29	6	0.0087219	0.027438	0.746506	796	3	-0.30533	0.45877	0.54065	1	11650	1	-0.30533
RPS11	6	0.0087324	0.027465	0.746506	797	2	0.38973	0.14746	0.25963	1	5602	2	0.38973
GEMIN7	6	0.0087663	0.027562	0.748226	798	4	-0.7078	0.93932	0.93926	1	20104	0	-0.7078
SIPA1L1	6	0.0087823	0.027613	0.748652	799	1	-0.24023	0.42672	0.52316	1	11259	1	-0.24023
MAGIX	6	0.0088321	0.027756	0.751603	800	3	-1.0482	0.99714	0.99718	1	21503	0	-1.0482
CCRN4L	6	0.0089227	0.028003	0.752396	802	3	-0.43813	0.00092881	0.0038582	0.675144	123	2	-0.43813
hsa-mir-6894	4	0.0088819	0.027899	0.752396	801	3	-0.6605	0.98544	0.98539	1	21148	0	-0.6605
PEBP4	6	0.0089304	0.028025	0.752396	803	3	-0.4704	0.56264	0.60343	1	12987	1	-0.4704
DDX24	6	0.0089318	0.028027	0.752396	804	2	-0.24347	0.90619	0.90607	1	19372	0	-0.24347
ANKRD32	6	0.0089438	0.028057	0.752396	805	4	-0.86912	0.97854	0.97848	1	20969	0	-0.86912
ARF4	6	0.0089521	0.028076	0.752396	806	4	-0.53969	0.9049	0.90478	1	19339	0	-0.53969
LETM2	6	0.0089537	0.02808	0.752396	807	4	-0.43721	0.97565	0.97562	1	20903	0	-0.43721
C1orf226	6	0.0089818	0.028156	0.752396	808	4	-0.49193	0.99576	0.9958	1	21449	0	-0.49193
CDK4	6	0.008982	0.028156	0.752396	809	4	-0.48952	0.99402	0.99402	1	21394	0	-0.48952
hsa-mir-516b-1	3	0.0089865	0.028169	0.752396	810	3	-0.51344	0.99101	0.991	1	21301	0	-0.51344
TIMM22	6	0.0089867	0.02817	0.752396	811	4	-0.79233	0.8899	0.88976	1	19005	0	-0.79233
IDUA	6	0.0089976	0.028202	0.752396	812	4	-0.65555	0.71984	0.72268	1	15461	1	-0.65555
HUWE1	6	0.0090157	0.028251	0.752774	813	3	-0.34286	0.94668	0.94668	1	20266	0	-0.34286
SCG5	6	0.0090472	0.028327	0.752992	814	2	-0.56282	0.60067	0.62908	1	13523	1	-0.56282
ERVFRD-1	6	0.009048	0.028329	0.752992	815	4	-0.70637	0.76723	0.7673	1	16393	0	-0.70637
EIF2B2	6	0.0090761	0.028413	0.753536	816	3	-0.60518	0.62718	0.64799	1	13913	1	-0.60518
S1PR5	6	0.0090779	0.028419	0.753536	817	4	-0.94742	0.95759	0.95758	1	20502	0	-0.94742
BAMBI	6	0.0091107	0.028512	0.753796	818	2	0.2276	0.19323	0.30822	1	6622	1	0.2276
C10orf54	6	0.0091222	0.028538	0.753796	819	3	-0.19884	0.63714	0.65536	1	14064	1	-0.19884
RTTN	6	0.0091277	0.028553	0.753796	820	4	-0.67781	0.99886	0.99886	1	21575	0	-0.67781
MARK2	6	0.0091329	0.028568	0.753796	821	3	-1.0504	0.90409	0.90398	1	19321	0	-1.0504
NOX1	6	0.0091463	0.028613	0.754071	822	4	-0.71126	0.8002	0.80017	1	17085	0	-0.71126
SNAP25	6	0.0091764	0.028712	0.754245	823	4	-0.8643	0.98514	0.9851	1	21143	0	-0.8643
GPR161	6	0.0091801	0.028721	0.754245	824	2	0.089174	0.64737	0.66314	1	14216	1	0.089174
PRSS8	6	0.0091811	0.028724	0.754245	825	3	-0.12692	0.92462	0.92456	1	19776	0	-0.12692
TRPM8	6	0.0092033	0.028784	0.754891	826	4	-0.69235	0.38094	0.4993	1	10744	1	-0.69235
ZNF253	6	0.0092381	0.028886	0.756365	827	3	-0.57717	0.029784	0.077629	0.954683	1755	2	-0.57717
FGF20	6	0.00928	0.02899	0.756365	828	3	-0.36266	0.33324	0.45085	1	9691	1	-0.36266
TNF	6	0.0092808	0.028991	0.756365	829	1	0.053939	0.63212	0.65164	1	13993	1	0.053939
ZNF843	6	0.0092841	0.028998	0.756365	830	4	-0.47909	0.92285	0.92278	1	19741	0	-0.47909
HDGF	6	0.0092905	0.029014	0.756365	831	3	-0.54914	0.34555	0.46363	1	9962	2	-0.54914
SAFB2	6	0.0093038	0.029055	0.756515	832	3	-0.33298	0.20906	0.32456	1	6996	2	-0.33298
C19orf80	6	0.0093303	0.029131	0.756719	833	3	-0.68019	0.19168	0.30658	1	6584	1	-0.68019
RAB6A	6	0.0093306	0.029133	0.756719	834	3	-0.17335	0.80178	0.80179	1	17117	0	-0.17335
MBD3	6	0.0093664	0.029224	0.757562	835	4	-0.66394	0.99969	0.99968	1	21631	0	-0.66394
MRPL19	6	0.0093706	0.029235	0.757562	836	4	-0.71415	0.95171	0.9517	1	20379	0	-0.71415
CRCP	6	0.0094217	0.029373	0.760229	837	4	-1.6866	0.95385	0.95381	1	20426	0	-1.6866
ALG3	6	0.0094485	0.029438	0.760988	838	3	-0.54135	0.85799	0.85815	1	18342	0	-0.54135
RHBDF1	6	0.0094779	0.029523	0.761394	839	3	-0.4745	0.80773	0.8077	1	17259	0	-0.4745
ZNF80	6	0.0094901	0.029562	0.761394	840	3	-0.2864	0.56088	0.60229	1	12961	1	-0.2864
NonTargetingControlGuideForHuman_0205	1	0.0094968	0.029581	0.761394	841	1	-1.7526	0.9905	0.99051	1	21283	0	-1.7526
MRPL17	6	0.0095005	0.029594	0.761394	842	4	-0.90821	0.90388	0.90376	1	19314	0	-0.90821
NCKAP1	6	0.0095246	0.029669	0.761726	843	4	-0.63641	0.96882	0.96876	1	20751	0	-0.63641
SLC25A48	6	0.009533	0.029691	0.761726	844	3	-0.69009	0.326	0.44351	1	9532	1	-0.69009
SOX5	6	0.0095418	0.029712	0.761726	845	4	-0.54698	0.99025	0.99025	1	21276	0	-0.54698
C16orf92	6	0.0095625	0.029774	0.762218	846	3	-0.66993	0.39241	0.50514	1	10871	1	-0.66993
YKT6	6	0.0095722	0.029802	0.762218	847	2	0.057223	0.71874	0.72173	1	15440	1	0.057223
SEC63	6	0.0096794	0.030094	0.764573	852	2	0.37855	0.016782	0.049255	0.920098	1158	2	0.37855
AP3D1	6	0.0096351	0.029982	0.764573	848	4	-0.75009	0.33213	0.44973	1	9664	1	-0.75009
HAPLN2	6	0.009638	0.02999	0.764573	849	3	-0.54075	0.26818	0.38443	1	8254	1	-0.54075
PEX11G	6	0.0096488	0.030016	0.764573	850	3	-0.47427	0.8572	0.85734	1	18329	0	-0.47427
DPM3	6	0.009667	0.030059	0.764573	851	2	-0.76839	0.68064	0.68926	1	14744	1	-0.76839
PKLR	6	0.0096848	0.03011	0.764573	853	2	0.29421	0.72123	0.72396	1	15485	1	0.29421
DLGAP5	6	0.0096967	0.030141	0.764573	854	2	0.11214	0.65479	0.66882	1	14333	1	0.11214
POLR3K	6	0.0097601	0.030323	0.768299	855	4	-1.2427	0.50996	0.57042	1	12300	1	-1.2427
FLAD1	6	0.0097874	0.03039	0.769079	856	4	-0.71276	0.25645	0.37252	1	8017	1	-0.71276
TMEM230	6	0.0099719	0.030892	0.769796	865	2	0.59806	0.022597	0.063851	0.93198	1482	3	0.59806
SNRNP200	6	0.0098219	0.030479	0.769796	857	2	-0.5253	0.7699	0.76991	1	16445	0	-0.5253
LACTB2	6	0.0098399	0.030528	0.769796	858	4	-0.87024	0.99967	0.99967	1	21628	0	-0.87024
MCF2L	6	0.0098484	0.030551	0.769796	859	4	-0.82727	0.89235	0.8922	1	19060	0	-0.82727
ZBTB1	6	0.0098749	0.030631	0.769796	860	3	-0.62449	0.42852	0.52411	1	11278	1	-0.62449
MTNR1B	6	0.0098878	0.030666	0.769796	861	3	-0.14857	0.22913	0.34485	1	7420	2	-0.14857
DCST1	6	0.0098925	0.030679	0.769796	862	4	-0.57912	0.42997	0.52489	1	11296	1	-0.57912
hsa-mir-3192	4	0.009893	0.03068	0.769796	863	2	-0.6315	0.38657	0.50212	1	10800	1	-0.6315
NUP153	6	0.0099479	0.030825	0.769796	864	3	-0.68116	0.73315	0.73467	1	15717	1	-0.68116
MTOR	6	0.0099783	0.030912	0.769796	866	3	-0.908	0.69419	0.70034	1	14994	1	-0.908
ST7	6	0.010004	0.030984	0.769796	867	3	-0.51504	0.8702	0.87027	1	18585	0	-0.51504
CYB5D1	6	0.01002	0.031023	0.769796	868	4	-0.43954	0.8266	0.82662	1	17669	0	-0.43954
AP2A2	6	0.010035	0.031075	0.769796	869	3	-0.14262	0.69727	0.70295	1	15039	1	-0.14262
DDOST	6	0.010052	0.031117	0.769796	870	4	-0.768	0.96975	0.96964	1	20769	0	-0.768
ZNF737	6	0.010058	0.031133	0.769796	871	4	-0.36437	0.65279	0.66727	1	14299	1	-0.36437
SNX6	6	0.010069	0.031162	0.769796	872	4	-0.8423	0.97618	0.97614	1	20919	0	-0.8423
MRPL36	6	0.010072	0.031172	0.769796	873	4	-0.62373	0.99521	0.99524	1	21434	0	-0.62373
SPATA8	6	0.010078	0.031187	0.769796	874	1	-0.13134	0.94201	0.94199	1	20166	0	-0.13134
USB1	6	0.010085	0.031212	0.769796	875	3	-0.30094	0.89449	0.89435	1	19113	0	-0.30094
VPS26A	6	0.010086	0.031215	0.769796	876	4	-0.83858	0.26849	0.38475	1	8258	1	-0.83858
NonTargetingControlGuideForHuman_0088	1	0.010091	0.031227	0.769796	877	1	-1.5434	0.98991	0.98992	1	21267	0	-1.5434
NPW	6	0.010104	0.031265	0.769796	878	4	-0.48594	0.72206	0.72472	1	15505	1	-0.48594
SSX2IP	6	0.010111	0.031281	0.769796	879	3	-0.40065	0.54185	0.59017	1	12697	1	-0.40065
SLC17A5	6	0.010129	0.031332	0.769796	880	4	-0.54527	0.84174	0.84182	1	17967	0	-0.54527
MEN1	6	0.010131	0.031338	0.769796	881	4	-0.58476	0.90041	0.90032	1	19253	0	-0.58476
EXOC1	6	0.010152	0.031393	0.769796	882	3	-0.73331	0.99707	0.99712	1	21500	0	-0.73331
hsa-mir-6876	4	0.010157	0.031405	0.769796	883	1	-0.055911	0.9063	0.90618	1	19374	0	-0.055911
NAA11	6	0.010159	0.031413	0.769796	884	2	-0.35359	0.41448	0.51663	1	11121	1	-0.35359
hsa-mir-218-2	4	0.010183	0.031477	0.770493	885	3	-1.0005	0.84569	0.84578	1	18073	0	-1.0005
RBPMS	6	0.010238	0.031641	0.773109	886	4	-0.61898	0.32961	0.44721	1	9612	1	-0.61898
GTF2H2C	2	0.010243	0.031655	0.773109	887	2	-0.94058	0.98976	0.98976	1	21261	0	-0.94058
CYP4X1	6	0.010283	0.031775	0.775159	888	3	-0.37739	0.54963	0.59508	1	12810	1	-0.37739
MSI2	6	0.010426	0.032156	0.776285	896	1	1.1661	0.0071167	0.022906	0.8585	578	3	1.1661
GPR35	6	0.010404	0.032097	0.776285	894	3	-0.27947	0.033451	0.084603	0.959544	1900	2	-0.27947
PHF15	6	0.010317	0.031865	0.776285	889	4	-0.76495	0.90574	0.9056	1	19357	0	-0.76495
GCSAM	6	0.010358	0.031983	0.776285	890	4	-0.67491	0.96604	0.96599	1	20682	0	-0.67491
RAB26	6	0.010367	0.032011	0.776285	891	4	-0.67434	0.99913	0.99912	1	21593	0	-0.67434
MMGT1	6	0.010377	0.032028	0.776285	892	1	0.066618	0.84317	0.84323	1	18000	0	0.066618
IK	6	0.010391	0.032064	0.776285	893	4	-0.52536	0.96649	0.96644	1	20690	0	-0.52536
CNIH2	6	0.010407	0.032105	0.776285	895	4	-1.0143	0.9212	0.92113	1	19698	0	-1.0143
RNASEK	6	0.010433	0.032177	0.776285	897	3	-0.38581	0.99321	0.99319	1	21373	0	-0.38581
EIF4A1	6	0.010436	0.032179	0.776285	898	3	-0.35431	0.88077	0.88066	1	18819	0	-0.35431
MAD1L1	6	0.010459	0.032243	0.776941	899	3	-0.26623	0.85207	0.85221	1	18210	0	-0.26623
C1orf54	6	0.010473	0.03228	0.776991	900	3	-0.33926	0.98149	0.98144	1	21044	0	-0.33926
FUT3	6	0.010488	0.032323	0.777151	901	4	-0.46634	0.81645	0.81642	1	17445	0	-0.46634
COG4	6	0.010526	0.032438	0.778437	902	2	0.068055	0.059908	0.13179	0.975627	2913	3	0.068055
IRF3	6	0.010555	0.03251	0.778437	903	3	-0.45047	0.89963	0.89955	1	19234	0	-0.45047
NARFL	6	0.010575	0.032557	0.778437	904	4	-0.48445	0.58195	0.61621	1	13255	1	-0.48445
CLEC5A	6	0.010576	0.032561	0.778437	905	1	-0.058751	0.519	0.57594	1	12399	1	-0.058751
hsa-mir-4664	4	0.010589	0.0326	0.778437	906	1	-0.055227	0.95022	0.95019	1	20343	0	-0.055227
PDE4C	6	0.010599	0.032633	0.778437	907	4	-0.5216	0.98062	0.9806	1	21017	0	-0.5216
CCDC78	6	0.010607	0.032659	0.778437	908	3	-0.55901	0.96271	0.96265	1	20617	0	-0.55901
CALU	6	0.010608	0.032664	0.778437	909	4	-0.56063	0.31896	0.43625	1	9389	1	-0.56063
PRPF3	6	0.01063	0.032735	0.779268	910	4	-0.37485	0.61062	0.63616	1	13655	1	-0.37485
POTEG	4	0.010674	0.032857	0.781325	911	2	-0.34684	0.68886	0.69596	1	14898	0	-0.34684
TMEM134	6	0.010763	0.033109	0.781614	917	2	-1.0694	0.0039167	0.01377	0.815186	363	2	-1.0694
SHPK	6	0.01071	0.032961	0.781614	912	3	-0.24397	0.83486	0.83497	1	17817	0	-0.24397
SAC3D1	6	0.010725	0.033001	0.781614	913	1	0.061205	0.62974	0.64991	1	13951	1	0.061205
ZNF93	5	0.010731	0.033015	0.781614	914	3	-0.45104	0.25653	0.37259	1	8019	1	-0.45104
NUP155	6	0.010748	0.033062	0.781614	915	4	-0.88577	0.87689	0.87689	1	18709	0	-0.88577
TBCB	6	0.010751	0.033078	0.781614	916	4	-0.69244	0.94602	0.94602	1	20251	0	-0.69244
hsa-mir-23a	4	0.010779	0.033156	0.781614	918	3	-0.66575	0.83988	0.83993	1	17930	0	-0.66575
IL5	6	0.010803	0.033213	0.781614	919	3	-0.20798	0.71574	0.71905	1	15387	1	-0.20798
NSUN4	6	0.010819	0.033253	0.781614	920	2	0.050644	0.75776	0.75782	1	16204	1	0.050644
hsa-mir-3180-5	3	0.010822	0.033259	0.781614	921	1	-1.8006	0.32877	0.44634	1	9596	1	-1.8006
C17orf85	6	0.010825	0.033266	0.781614	922	4	-0.67445	0.56204	0.60306	1	12978	1	-0.67445
FBXL18	6	0.010866	0.033384	0.783522	923	4	-0.44529	0.7463	0.74681	1	15976	1	-0.44529
TRERF1	6	0.01089	0.033449	0.783522	924	4	-0.60801	0.6701	0.68078	1	14580	1	-0.60801
MAGED4B	2	0.010894	0.033456	0.783522	925	2	-0.80703	0.95736	0.95733	1	20495	0	-0.80703
ADAMTS7	6	0.010916	0.033523	0.784236	926	3	-0.83905	0.96729	0.96726	1	20717	0	-0.83905
CCDC130	6	0.01097	0.03367	0.785605	927	4	-0.66269	0.95236	0.95235	1	20392	0	-0.66269
MPO	6	0.010974	0.03368	0.785605	928	1	0.36011	0.14507	0.2571	1	5540	2	0.36011
CPSF3	6	0.010978	0.03369	0.785605	929	4	-1.0108	0.99651	0.99655	1	21475	0	-1.0108
PARVA	6	0.011007	0.033772	0.786666	930	2	-0.61963	0.23918	0.35501	1	7648	1	-0.61963
GPR137	6	0.011039	0.033851	0.787671	931	2	-0.11555	0.1431	0.25498	1	5496	1	-0.11555
MRPL3	6	0.011159	0.03416	0.789646	935	3	-0.12905	0.10193	0.20294	0.997867	4405	1	-0.12905
ATP6V0C	6	0.011092	0.033996	0.789646	932	3	-1.3872	0.81355	0.81353	1	17375	0	-1.3872
STAT5B	6	0.011123	0.034072	0.789646	933	1	-0.13681	0.80615	0.80614	1	17227	0	-0.13681
ZNF70	6	0.01114	0.034116	0.789646	934	2	-0.65045	0.81071	0.81068	1	17311	0	-0.65045
GAL3ST2	6	0.01116	0.034162	0.789646	936	3	-0.46501	0.97386	0.97381	1	20863	0	-0.46501
CSAD	6	0.011173	0.034191	0.789646	937	4	-0.5749	0.4758	0.55038	1	11875	1	-0.5749
FOXR2	6	0.011173	0.034191	0.789646	938	3	-0.056237	0.34545	0.46352	1	9960	2	-0.056237
CEMP1	6	0.0112	0.034266	0.790534	939	4	-0.49771	0.92947	0.92938	1	19884	0	-0.49771
CLN6	6	0.011225	0.034345	0.791505	940	3	-0.32779	0.54841	0.59433	1	12794	1	-0.32779
C11orf1	6	0.01126	0.034438	0.792127	941	4	-0.59767	0.3157	0.43291	1	9316	2	-0.59767
NXNL1	6	0.011264	0.034445	0.792127	942	4	-0.43853	0.89366	0.89352	1	19095	0	-0.43853
SMOX	6	0.011339	0.034643	0.795833	943	4	-0.34073	0.99835	0.99839	1	21547	0	-0.34073
FAHD1	6	0.01142	0.034857	0.797484	944	3	-0.33612	0.99002	0.99003	1	21271	0	-0.33612
TBC1D12	6	0.011422	0.034864	0.797484	945	3	-0.66577	0.8689	0.86894	1	18556	0	-0.66577
ANKRD37	6	0.011425	0.034868	0.797484	946	3	-0.49263	0.92607	0.92602	1	19817	0	-0.49263
hsa-mir-548q	4	0.011436	0.034897	0.797484	947	2	-1.6187	0.85715	0.85728	1	18327	0	-1.6187
hsa-mir-6878	4	0.011437	0.034899	0.797484	948	3	-0.69703	0.11641	0.22668	1	4898	1	-0.69703
TMEM159	6	0.011472	0.035003	0.798031	949	3	-0.42025	0.94253	0.94251	1	20175	0	-0.42025
hsa-mir-5571	4	0.011472	0.035004	0.798031	950	3	-1.76	0.64359	0.6602	1	14160	0	-1.76
PFDN2	6	0.011485	0.035042	0.798031	951	2	-0.25978	0.81571	0.81567	1	17427	0	-0.25978
SEC61A1	6	0.011509	0.035115	0.798031	952	4	-1.415	0.98943	0.98943	1	21249	0	-1.415
C1orf110	6	0.011511	0.035118	0.798031	953	4	-0.38569	0.94579	0.9458	1	20246	0	-0.38569
XCL1	6	0.011521	0.035144	0.798031	954	3	-0.43978	0.9055	0.90538	1	19350	0	-0.43978
HBEGF	6	0.011545	0.035213	0.798761	955	4	-0.49091	0.95291	0.95292	1	20407	0	-0.49091
ZDBF2	6	0.011564	0.035272	0.799272	956	3	-0.75851	0.61465	0.63899	1	13712	1	-0.75851
LYRM5	6	0.011649	0.035489	0.802398	957	3	-0.40436	0.85864	0.85878	1	18357	0	-0.40436
NCOA5	6	0.011655	0.035504	0.802398	958	4	-0.53907	0.81702	0.81697	1	17465	0	-0.53907
DEFB106A	6	0.01167	0.035539	0.802398	959	3	-0.22171	0.84663	0.84673	1	18092	0	-0.22171
GATAD2A	6	0.011679	0.035558	0.802398	960	3	-0.41873	0.46324	0.54316	1	11706	1	-0.41873
PRDM13	6	0.011728	0.035692	0.804571	961	3	-0.58777	0.93837	0.93831	1	20088	0	-0.58777
IKBKG	6	0.011749	0.03575	0.804656	962	3	-0.13381	0.37469	0.49386	1	10627	1	-0.13381
PPP2R2A	6	0.01177	0.035798	0.804656	963	1	-0.061483	0.81459	0.81454	1	17397	0	-0.061483
GARS	6	0.011775	0.035807	0.804656	964	2	-0.17014	0.25439	0.37043	1	7975	2	-0.17014
ZC3H8	6	0.011795	0.03587	0.805238	965	3	-0.88776	0.43041	0.52512	1	11303	1	-0.88776
SPTLC1	6	0.011815	0.035922	0.805573	966	4	-0.71269	0.99912	0.99911	1	21592	0	-0.71269
SPPL2B	6	0.011835	0.035978	0.805999	967	3	-0.29716	0.91053	0.91043	1	19455	0	-0.29716
CHST12	6	0.011959	0.03632	0.807154	972	4	-0.43278	0.065799	0.14205	0.9768	3146	1	-0.43278
MED4	6	0.011907	0.036176	0.807154	968	4	-0.85083	0.99887	0.99887	1	21576	0	-0.85083
hsa-mir-1273h	4	0.01195	0.036297	0.807154	969	1	-0.50954	0.11341	0.2218	1	4804	1	-0.50954
TAF5	6	0.011953	0.036303	0.807154	970	4	-0.71519	0.94838	0.94837	1	20307	0	-0.71519
SEPSECS	6	0.011958	0.036314	0.807154	971	2	-0.39303	0.92996	0.92986	1	19895	0	-0.39303
NAPA	6	0.011973	0.036361	0.807154	973	4	-0.82215	0.99729	0.99734	1	21512	0	-0.82215
ZNF681	6	0.011976	0.036366	0.807154	974	4	-0.73582	0.33977	0.45762	1	9841	1	-0.73582
HTR2B	6	0.011984	0.036385	0.807154	975	4	-0.46972	0.14607	0.25818	1	5566	2	-0.46972
MPRIP	6	0.011984	0.036387	0.807154	976	2	-0.27427	0.83607	0.83616	1	17845	0	-0.27427
SCEL	6	0.011991	0.036403	0.807154	977	3	-0.55211	0.84561	0.8457	1	18069	0	-0.55211
PYROXD1	6	0.012072	0.036607	0.807789	979	3	-0.065486	0.016832	0.049378	0.920098	1162	3	-0.065486
VPS54	6	0.012068	0.036595	0.807789	978	3	-0.42186	0.26826	0.38451	1	8255	1	-0.42186
C6orf57	6	0.012082	0.036633	0.807789	980	3	-0.6268	0.98402	0.98398	1	21111	0	-0.6268
hsa-mir-1272	4	0.012099	0.036691	0.807789	981	3	-0.60185	0.97149	0.9714	1	20812	0	-0.60185
TBL1X	6	0.012101	0.036698	0.807789	982	4	-0.50068	0.86867	0.86873	1	18553	0	-0.50068
UBN1	6	0.012109	0.036723	0.807789	983	3	-1.0303	0.99717	0.99722	1	21505	0	-1.0303
RUNDC3A	6	0.012118	0.036749	0.807789	984	2	0.045702	0.24667	0.36262	1	7819	1	0.045702
MINK1	6	0.012119	0.036753	0.807789	985	4	-0.52145	0.20803	0.32355	1	6969	1	-0.52145
OR6C6	6	0.012126	0.036767	0.807789	986	4	-0.48649	0.97501	0.97497	1	20895	0	-0.48649
PAQR4	6	0.012149	0.03682	0.808134	987	3	-0.41732	0.54566	0.59257	1	12747	1	-0.41732
DHX33	6	0.012166	0.036871	0.808146	988	4	-0.83459	0.36817	0.48717	1	10474	1	-0.83459
PLEKHO1	6	0.012181	0.036912	0.808146	989	4	-0.44307	0.99104	0.99103	1	21304	0	-0.44307
TRPC6	6	0.012188	0.036932	0.808146	990	3	-0.31977	0.76714	0.76721	1	16389	0	-0.31977
THAP11	6	0.012248	0.037082	0.810597	991	4	-0.55184	0.8627	0.8628	1	18437	0	-0.55184
HIST1H2AI	6	0.012317	0.037274	0.811528	995	1	0.41107	0.042727	0.10141	0.971817	2256	3	0.41107
RXFP1	6	0.012294	0.037214	0.811528	992	3	-0.51313	0.79874	0.7987	1	17054	0	-0.51313
SERPINC1	6	0.012306	0.037247	0.811528	993	4	-0.45082	0.34705	0.4652	1	9997	2	-0.45082
CAST	6	0.012312	0.037261	0.811528	994	4	-0.50482	0.45405	0.538	1	11583	1	-0.50482
SPPL2A	6	0.012334	0.037321	0.811737	996	2	-0.098422	0.20343	0.31893	1	6858	2	-0.098422
OTUD6B	6	0.012367	0.037405	0.81275	997	2	-0.30805	0.80652	0.80653	1	17235	0	-0.30805
MRPL18	6	0.012382	0.037444	0.812779	998	4	-0.72442	0.98574	0.98569	1	21159	0	-0.72442
UBOX5	6	0.012416	0.037539	0.813203	1000	1	0.019594	0.050897	0.11591	0.974908	2574	2	0.019594
FAM127B	6	0.012407	0.037517	0.813203	999	3	-0.54009	0.81746	0.81742	1	17476	0	-0.54009
KCNK1	6	0.012432	0.037585	0.81338	1001	4	-0.30196	0.70836	0.71256	1	15236	1	-0.30196
FIP1L1	6	0.012466	0.037681	0.813523	1002	3	-0.31036	0.63004	0.65013	1	13959	1	-0.31036
BAP1	6	0.012471	0.037698	0.813523	1003	4	-0.93181	0.99761	0.99764	1	21524	0	-0.93181
TM2D3	6	0.012474	0.037704	0.813523	1004	3	-0.39908	0.48184	0.55389	1	11956	1	-0.39908
DDX4	6	0.012594	0.038039	0.81433	1011	3	-0.18004	3.6e-05	0.00018488	0.284158	13	2	-0.18004
TMEM143	6	0.012638	0.038154	0.81433	1012	4	-0.73199	0.044834	0.1052	0.973339	2338	2	-0.73199
KDM2A	6	0.012507	0.037799	0.81433	1005	2	-0.82842	0.81786	0.81785	1	17491	0	-0.82842
FBN2	6	0.01252	0.03784	0.81433	1006	3	-0.32119	0.97771	0.97765	1	20953	0	-0.32119
TRIM39-RPP21	2	0.012542	0.037893	0.81433	1007	1	-0.23561	0.34219	0.46015	1	9898	1	-0.23561
C11orf24	6	0.012547	0.037907	0.81433	1008	4	-0.64561	0.9265	0.92645	1	19824	0	-0.64561
OFD1	6	0.012565	0.037958	0.81433	1009	2	-0.23146	0.41583	0.51734	1	11140	1	-0.23146
SAMD12	6	0.012588	0.038021	0.81433	1010	3	-0.66812	0.2003	0.31565	1	6789	2	-0.66812
NDST1	6	0.012648	0.03818	0.81433	1013	3	-0.49628	0.99539	0.99542	1	21440	0	-0.49628
ANO4	6	0.012648	0.03818	0.81433	1014	3	-0.4137	0.38014	0.49885	1	10735	1	-0.4137
SPRR2E	1	0.012653	0.038193	0.81433	1015	1	-1.2574	0.98735	0.9873	1	21211	0	-1.2574
BCL11A	6	0.012658	0.038209	0.81433	1016	3	-0.56029	0.70623	0.71072	1	15207	1	-0.56029
TMEM221	6	0.012665	0.03823	0.81433	1017	1	-0.10344	0.39565	0.50681	1	10899	1	-0.10344
SYT3	6	0.012715	0.03838	0.815928	1019	1	0.30976	0.081678	0.1689	0.993072	3679	2	0.30976
ATP6V1B1	6	0.012714	0.038378	0.815928	1018	4	-0.58724	0.9312	0.93114	1	19928	0	-0.58724
FAM63A	6	0.012735	0.038443	0.816468	1020	3	-0.26181	0.97487	0.97483	1	20890	0	-0.26181
VSTM2L	6	0.012764	0.038511	0.817113	1021	2	0.002537	0.95396	0.95392	1	20429	0	0.002537
ACOT7	6	0.012799	0.038603	0.817678	1022	4	-0.47557	0.79138	0.7914	1	16903	0	-0.47557
SSX4B	3	0.012815	0.038647	0.817678	1023	2	-0.62471	0.98237	0.98231	1	21061	0	-0.62471
KCNE2	6	0.012817	0.038651	0.817678	1024	4	-0.70862	0.68804	0.69529	1	14887	1	-0.70862
MTRNR2L1	4	0.012882	0.038829	0.820253	1025	3	-0.49499	0.80959	0.80953	1	17293	0	-0.49499
CHID1	6	0.012891	0.038849	0.820253	1026	2	0.24862	0.64691	0.66278	1	14209	1	0.24862
hsa-mir-4417	4	0.012943	0.038989	0.822008	1027	3	-0.73134	0.38233	0.49998	1	10760	1	-0.73134
GORAB	6	0.012963	0.039037	0.822008	1028	1	-0.26573	0.9787	0.97864	1	20975	0	-0.26573
REP15	6	0.012967	0.039046	0.822008	1029	3	-0.88645	0.95578	0.95575	1	20460	0	-0.88645
METTL14	6	0.013097	0.039398	0.822263	1036	4	-0.60038	0.031937	0.081712	0.957346	1849	1	-0.60038
EIF1AX	6	0.012999	0.039141	0.822263	1030	3	-1.3259	0.74458	0.74518	1	15933	1	-1.3259
RNGTT	6	0.013013	0.039178	0.822263	1031	2	-0.19942	0.63892	0.65674	1	14100	1	-0.19942
ZNF813	3	0.013028	0.039216	0.822263	1032	2	-0.94798	0.91729	0.91727	1	19604	0	-0.94798
SUV39H1	6	0.013042	0.039253	0.822263	1033	3	-0.53742	0.85509	0.85524	1	18282	0	-0.53742
MPDU1	6	0.01306	0.039299	0.822263	1034	3	-0.61696	0.59185	0.62302	1	13398	1	-0.61696
WDR74	6	0.013095	0.039393	0.822263	1035	4	-0.98507	0.21112	0.32668	1	7044	1	-0.98507
CTPS2	6	0.013105	0.039422	0.822263	1037	4	-0.35578	0.61563	0.6397	1	13733	1	-0.35578
LOC643037	6	0.01311	0.039435	0.822263	1038	3	-0.58023	0.99357	0.99355	1	21382	0	-0.58023
TNFRSF11B	6	0.013112	0.039437	0.822263	1039	1	-0.20167	0.6215	0.64393	1	13825	1	-0.20167
MVK	6	0.013162	0.039569	0.823565	1040	3	-0.51283	0.95639	0.95637	1	20476	0	-0.51283
EME2	6	0.013166	0.039576	0.823565	1041	3	-0.24454	0.35092	0.46923	1	10083	1	-0.24454
NonTargetingControlGuideForHuman_0520	1	0.013188	0.039637	0.823581	1042	1	-1.139	0.98681	0.98678	1	21192	0	-1.139
TET3	6	0.013194	0.039653	0.823581	1043	4	-0.56817	0.69015	0.69702	1	14921	1	-0.56817
C22orf28	6	0.013213	0.039707	0.823741	1044	4	-0.54696	0.99858	0.99859	1	21557	0	-0.54696
HEXB	6	0.013254	0.039805	0.823741	1045	3	-0.24949	0.9841	0.98406	1	21113	0	-0.24949
DUOX2	6	0.013257	0.039812	0.823741	1046	4	-0.79561	0.27704	0.3935	1	8442	1	-0.79561
RFX5	6	0.013267	0.039835	0.823741	1047	3	-0.46317	0.98623	0.9862	1	21171	0	-0.46317
PIP4K2C	6	0.013279	0.039872	0.823741	1048	3	-0.57394	0.80306	0.80307	1	17150	0	-0.57394
KLHL15	6	0.013285	0.039888	0.823741	1049	4	-0.3449	0.90258	0.90248	1	19290	0	-0.3449
MED6	6	0.013313	0.039971	0.824201	1050	4	-0.49861	0.10179	0.20271	0.997867	4396	2	-0.49861
CITED2	6	0.013326	0.040009	0.824201	1051	4	-0.40556	0.93626	0.93623	1	20043	0	-0.40556
RPN1	6	0.013333	0.040025	0.824201	1052	3	-0.3953	0.28166	0.39816	1	8549	2	-0.3953
SNRPG	6	0.013362	0.040106	0.824318	1053	3	-0.79622	0.99924	0.99923	1	21601	0	-0.79622
GDF1	6	0.013376	0.040136	0.824318	1054	4	-1.3841	0.99823	0.99827	1	21544	0	-1.3841
DDA1	4	0.013387	0.040172	0.824318	1055	3	-0.70392	0.98523	0.98519	1	21145	0	-0.70392
hsa-mir-4519	4	0.013392	0.040183	0.824318	1056	3	-0.59199	0.99215	0.99215	1	21342	0	-0.59199
ZNF536	6	0.01341	0.040231	0.824522	1057	1	0.21003	0.11992	0.23055	1	4969	1	0.21003
DNAJC15	6	0.013516	0.040509	0.829079	1058	4	-0.5717	0.42473	0.52205	1	11236	1	-0.5717
ZBTB20	6	0.013525	0.04053	0.829079	1059	4	-0.64846	0.394	0.50596	1	10886	1	-0.64846
GFRAL	6	0.013722	0.041026	0.830125	1070	2	0.14423	0.051044	0.11619	0.974908	2581	2	0.14423
NAT14	6	0.013569	0.040638	0.830125	1060	3	-0.3462	0.85941	0.85955	1	18376	0	-0.3462
COG6	6	0.013609	0.040733	0.830125	1061	4	-0.39321	0.27162	0.38794	1	8319	1	-0.39321
OR7C1	6	0.013632	0.040787	0.830125	1062	2	-0.39654	0.64632	0.66231	1	14201	1	-0.39654
DDX3X	6	0.013632	0.040787	0.830125	1063	3	-0.49209	0.17586	0.28976	1	6219	2	-0.49209
ECI1	6	0.013646	0.040825	0.830125	1064	3	-0.39046	0.57187	0.60945	1	13111	1	-0.39046
SMCR8	6	0.013658	0.040857	0.830125	1065	3	-0.48499	0.97112	0.97101	1	20797	0	-0.48499
HOXB5	6	0.013679	0.040904	0.830125	1066	4	-0.94859	0.43974	0.53014	1	11407	1	-0.94859
EIF4H	6	0.013692	0.040941	0.830125	1067	3	-0.29192	0.94681	0.9468	1	20269	0	-0.29192
SNAPC2	6	0.013708	0.040989	0.830125	1068	3	-0.62364	0.99888	0.99888	1	21577	0	-0.62364
HIST3H2BB	6	0.01372	0.041021	0.830125	1069	4	-0.50748	0.19096	0.30577	1	6569	1	-0.50748
ABHD1	6	0.013726	0.041041	0.830125	1071	4	-0.43395	0.86706	0.86716	1	18514	0	-0.43395
INO80C	6	0.013758	0.041125	0.831051	1072	3	-0.22697	0.35351	0.47187	1	10139	1	-0.22697
COX6A2	6	0.013841	0.041351	0.834149	1073	2	0.23434	0.22731	0.343	1	7377	1	0.23434
EDEM1	6	0.013844	0.041355	0.834149	1074	4	-0.60964	0.61311	0.63792	1	13691	1	-0.60964
NCKAP1L	6	0.01403	0.041859	0.835343	1082	3	0.00034023	0.036815	0.090703	0.963932	2037	2	0.00034023
CATSPER3	6	0.013896	0.041492	0.835343	1075	4	-0.50385	0.19533	0.31045	1	6673	2	-0.50385
hsa-mir-3655	4	0.013906	0.041521	0.835343	1076	1	-0.04	0.82033	0.82037	1	17542	0	-0.04
FPR1	6	0.013946	0.041627	0.835343	1077	2	-0.20413	0.30562	0.42251	1	9098	1	-0.20413
LIX1L	6	0.013979	0.041711	0.835343	1078	4	-0.40515	0.56534	0.60516	1	13018	1	-0.40515
FGL1	6	0.013983	0.041721	0.835343	1079	4	-0.52473	0.99977	0.99977	1	21635	0	-0.52473
NDUFS7	6	0.013997	0.041759	0.835343	1080	4	-0.50676	0.39121	0.50452	1	10857	1	-0.50676
NPEPPS	6	0.014006	0.041787	0.835343	1081	4	-0.56665	0.81369	0.81367	1	17378	0	-0.56665
MTR	6	0.01404	0.041881	0.835343	1083	4	-0.63524	0.98724	0.98718	1	21205	0	-0.63524
PREB	6	0.014055	0.041926	0.835343	1084	3	-0.28171	0.8963	0.89617	1	19155	0	-0.28171
hsa-mir-3689e	2	0.014072	0.041971	0.835343	1085	1	-0.56997	0.5473	0.59362	1	12775	0	-0.56997
hsa-mir-215	4	0.014072	0.041972	0.835343	1086	3	-0.91185	0.68375	0.69179	1	14800	0	-0.91185
MCMDC2	6	0.014073	0.041973	0.835343	1087	2	0.078124	0.26119	0.37735	1	8115	1	0.078124
CCDC120	6	0.014074	0.041977	0.835343	1088	3	-0.23953	0.37647	0.49573	1	10672	2	-0.23953
NSMCE1	6	0.01408	0.041993	0.835343	1089	2	0.14228	0.31143	0.4285	1	9222	2	0.14228
LOC730183	6	0.014105	0.042059	0.835726	1090	3	-1.0628	0.014204	0.042392	0.895868	1024	1	-1.0628
TRIM65	6	0.014116	0.042089	0.835726	1091	4	-0.55882	0.18704	0.30159	1	6477	1	-0.55882
SLC10A4	6	0.014155	0.042193	0.836001	1092	1	0.23118	0.42209	0.52065	1	11207	1	0.23118
EIF3M	6	0.014166	0.04222	0.836001	1093	3	-0.48107	0.77586	0.7758	1	16568	0	-0.48107
DIRC1	6	0.014169	0.042229	0.836001	1094	3	-0.45778	0.95148	0.95146	1	20374	0	-0.45778
C14orf2	6	0.014182	0.042257	0.836001	1095	4	-0.69716	0.87318	0.87324	1	18640	0	-0.69716
TMEM151A	6	0.014207	0.042326	0.836218	1096	3	-0.48615	0.98666	0.98663	1	21186	0	-0.48615
TAF3	6	0.014214	0.042346	0.836218	1097	3	-0.54645	0.64821	0.6638	1	14233	1	-0.54645
ARL2	6	0.014245	0.042436	0.836701	1098	3	-0.80455	0.67618	0.68562	1	14680	1	-0.80455
GPR139	6	0.014257	0.042469	0.836701	1099	4	-0.38366	0.71759	0.7207	1	15420	1	-0.38366
PABPC1L2A	6	0.014262	0.042486	0.836701	1100	3	-0.21678	0.9157	0.91564	1	19560	0	-0.21678
hsa-mir-6507	4	0.014304	0.04261	0.836858	1103	1	-1.0698	0.045267	0.10594	0.973465	2357	1	-1.0698
EARS2	6	0.014299	0.042596	0.836858	1101	2	-0.01032	0.04808	0.11095	0.974908	2452	3	-0.01032
MSRB1	6	0.0143	0.042599	0.836858	1102	3	-0.6164	0.29423	0.41094	1	8838	1	-0.6164
ATP5G3	6	0.01433	0.042697	0.837189	1104	4	-0.75536	0.95638	0.95635	1	20475	0	-0.75536
WDR1	6	0.014335	0.042704	0.837189	1105	2	-0.1166	0.40474	0.51152	1	11006	1	-0.1166
JMJD8	6	0.014353	0.042757	0.83748	1106	2	-0.021317	0.1196	0.23023	1	4963	1	-0.021317
KANSL3	6	0.01439	0.042851	0.837575	1107	4	-0.45721	0.98997	0.98998	1	21269	0	-0.45721
PAN3	6	0.014399	0.042876	0.837575	1108	4	-0.7998	0.23312	0.34898	1	7517	1	-0.7998
AKAP10	6	0.014403	0.042886	0.837575	1109	3	-0.36914	0.50391	0.56677	1	12232	1	-0.36914
CRTC1	6	0.014414	0.042917	0.837575	1110	3	-0.59512	0.78822	0.78822	1	16835	0	-0.59512
hsa-mir-1265	4	0.014437	0.042975	0.837929	1111	3	-0.37334	0.97132	0.97122	1	20804	0	-0.37334
PNOC	6	0.014453	0.043012	0.837929	1112	1	0.066264	0.1472	0.25937	1	5597	2	0.066264
ZNF33B	6	0.014468	0.043055	0.837989	1113	4	-0.53942	0.82796	0.82795	1	17687	0	-0.53942
RPS17	6	0.014484	0.043093	0.837989	1114	4	-0.581	0.99745	0.99749	1	21516	0	-0.581
METTL17	6	0.014552	0.043262	0.840523	1115	2	-0.21025	0.16831	0.28166	1	6037	1	-0.21025
ZFYVE21	6	0.014606	0.043398	0.840907	1118	2	-0.15709	0.097207	0.19508	0.997867	4235	2	-0.15709
PXK	6	0.014577	0.043329	0.840907	1116	4	-0.60738	0.97155	0.97145	1	20814	0	-0.60738
ACSBG2	6	0.014594	0.04337	0.840907	1117	3	-0.50383	0.96288	0.96284	1	20621	0	-0.50383
MPHOSPH10	6	0.014664	0.043545	0.842771	1119	3	-0.47094	0.93094	0.93088	1	19920	0	-0.47094
2018-03-05	6	0.014692	0.043621	0.842771	1120	3	-0.35191	0.70995	0.71393	1	15266	1	-0.35191
ANAPC13	6	0.014698	0.043636	0.842771	1121	4	-0.56973	0.9865	0.98647	1	21180	0	-0.56973
KLHDC9	6	0.014702	0.04365	0.842771	1122	3	-0.37768	0.99044	0.99045	1	21281	0	-0.37768
HYPK	6	0.014723	0.043697	0.842929	1123	4	-0.75786	0.97702	0.97698	1	20937	0	-0.75786
LCE6A	6	0.014786	0.04388	0.84293	1125	2	0.22938	0.010172	0.031439	0.87963	763	2	0.22938
CFL1	6	0.014747	0.043764	0.84293	1124	4	-0.5338	0.89289	0.89275	1	19073	0	-0.5338
SNAP47	6	0.014793	0.043898	0.84293	1126	2	-0.05462	0.75009	0.75044	1	16050	1	-0.05462
FIS1	6	0.0148	0.043913	0.84293	1127	3	-0.12858	0.35008	0.46836	1	10063	2	-0.12858
INO80B	6	0.014804	0.043924	0.84293	1128	3	-0.5333	0.27174	0.38807	1	8322	1	-0.5333
SPDYE1	6	0.014807	0.043931	0.84293	1129	3	-0.44437	0.22552	0.3412	1	7345	1	-0.44437
UFC1	6	0.014832	0.043995	0.843429	1130	3	-0.41426	0.30093	0.41778	1	8997	2	-0.41426
CHEK1	6	0.014865	0.044085	0.844399	1131	3	-0.41343	0.8961	0.89597	1	19148	0	-0.41343
SCGB1A1	6	0.01492	0.044245	0.846723	1132	3	-0.27394	0.83875	0.83884	1	17904	0	-0.27394
MOGS	6	0.014945	0.044311	0.847234	1133	3	-0.42794	0.7748	0.77476	1	16544	0	-0.42794
NTN3	6	0.015017	0.044503	0.849396	1135	3	-0.02743	0.10306	0.20476	0.998797	4441	3	-0.02743
RAB8A	6	0.015005	0.044472	0.849396	1134	3	-1.4904	0.98733	0.98728	1	21209	0	-1.4904
IGJ	6	0.015076	0.044666	0.851768	1136	4	-0.53569	0.19012	0.30488	1	6552	1	-0.53569
NOC2L	6	0.015097	0.04472	0.852047	1137	2	-0.21948	0.98967	0.98966	1	21255	0	-0.21948
LRRC36	6	0.015126	0.044788	0.852586	1138	4	-0.53233	0.99229	0.99228	1	21346	0	-0.53233
ASB8	6	0.015147	0.044837	0.852776	1139	2	-0.23939	0.47553	0.55024	1	11872	1	-0.23939
CLEC18B	4	0.015194	0.044954	0.853423	1140	2	-0.50358	0.20144	0.31683	1	6812	1	-0.50358
ZMYM1	6	0.015207	0.04499	0.853423	1141	2	-0.025004	0.88552	0.88532	1	18914	0	-0.025004
HINFP	6	0.015207	0.04499	0.853423	1142	4	-0.6194	0.11884	0.2294	1	4950	1	-0.6194
VARS	6	0.015247	0.045094	0.854651	1143	3	-0.61464	0.27879	0.39529	1	8488	2	-0.61464
NPS	6	0.015265	0.045141	0.854796	1144	3	-0.21222	0.0090934	0.028446	0.873288	703	2	-0.21222
MATK	6	0.015287	0.045207	0.855256	1145	2	0.10768	0.34801	0.4662	1	10017	1	0.10768
ZXDA	6	0.015302	0.045244	0.855256	1146	2	-0.13064	0.98816	0.98815	1	21228	0	-0.13064
DAGLA	6	0.015316	0.045286	0.855305	1147	3	-0.58366	0.9642	0.96417	1	20644	0	-0.58366
ANKRD17	6	0.015348	0.045367	0.856078	1148	4	-0.48546	0.78646	0.78641	1	16789	0	-0.48546
CMTM6	6	0.015372	0.045437	0.856651	1149	4	-0.55423	0.032963	0.083705	0.959544	1882	1	-0.55423
PUS1	6	0.015412	0.045545	0.857955	1150	2	-0.25656	0.9872	0.98715	1	21203	0	-0.25656
PDIA2	6	0.015426	0.045587	0.857964	1151	2	-0.12952	0.14336	0.25529	1	5503	1	-0.12952
ZNF98	6	0.015456	0.045661	0.857964	1152	4	-0.6197	0.32343	0.44084	1	9474	1	-0.6197
SEC24A	6	0.015458	0.045665	0.857964	1153	4	-0.63884	0.95767	0.95766	1	20506	0	-0.63884
RIN2	6	0.015544	0.045876	0.858067	1156	1	0.42253	0.01941	0.056171	0.923377	1312	2	0.42253
SSU72	6	0.015478	0.045717	0.858067	1154	2	-0.46144	0.68335	0.69147	1	14795	1	-0.46144
ZNF492	6	0.015502	0.045773	0.858067	1155	4	-0.49532	0.92394	0.92387	1	19761	0	-0.49532
NR2F2	6	0.015544	0.045877	0.858067	1157	3	-0.5151	0.30517	0.42207	1	9088	1	-0.5151
SF3A1	6	0.015559	0.045919	0.858067	1158	2	-0.24277	0.32409	0.44153	1	9493	1	-0.24277
MMP19	6	0.015579	0.045965	0.858067	1159	4	-0.46817	0.85434	0.85449	1	18256	0	-0.46817
MMP9	6	0.015584	0.045977	0.858067	1160	4	-0.4808	0.4536	0.53776	1	11577	1	-0.4808
KPNB1	6	0.015593	0.046002	0.858067	1161	1	-0.01048	0.8851	0.88492	1	18909	0	-0.01048
SRPRB	6	0.015604	0.046027	0.858067	1162	4	-0.49146	0.99448	0.99452	1	21412	0	-0.49146
ELP5	6	0.015677	0.046211	0.85986	1163	4	-0.77562	0.060471	0.13281	0.975627	2937	2	-0.77562
RFPL1	6	0.015698	0.046264	0.85986	1164	3	-0.58422	0.85063	0.85076	1	18181	0	-0.58422
ERI2	6	0.015699	0.046267	0.85986	1165	2	0.14332	0.35682	0.47529	1	10212	1	0.14332
PAGE1	6	0.015742	0.046375	0.85986	1166	2	-0.10909	0.8177	0.81768	1	17484	0	-0.10909
SLC25A40	6	0.015744	0.046379	0.85986	1167	3	-0.54829	0.86996	0.87003	1	18579	0	-0.54829
GTF2B	6	0.015755	0.046412	0.85986	1168	4	-0.59611	0.99969	0.99968	1	21630	0	-0.59611
OR5K1	6	0.015764	0.04644	0.85986	1169	3	-0.40772	0.12492	0.23573	1	5077	1	-0.40772
hsa-mir-6132	4	0.015766	0.046444	0.85986	1170	3	-0.67697	0.96637	0.96631	1	20687	0	-0.67697
NANOS3	6	0.015782	0.04648	0.85986	1171	4	-0.44827	0.33813	0.45595	1	9795	2	-0.44827
FAM151A	6	0.015848	0.046643	0.862123	1172	4	-0.4906	0.81711	0.81707	1	17468	0	-0.4906
EIF4B	6	0.015891	0.046765	0.862123	1173	1	0.50365	0.28157	0.39807	1	8547	2	0.50365
NonTargetingControlGuideForHuman_0569	1	0.015892	0.046767	0.862123	1174	1	-2.194	0.98411	0.98407	1	21114	0	-2.194
OR2AT4	6	0.015902	0.046795	0.862123	1175	4	-0.52516	0.75731	0.7574	1	16196	1	-0.52516
SLC5A5	6	0.015904	0.046801	0.862123	1176	4	-0.42076	0.99292	0.9929	1	21367	0	-0.42076
C19orf21	6	0.01594	0.046893	0.863081	1177	1	-0.0080062	0.23905	0.35488	1	7643	2	-0.0080062
LAT	6	0.01599	0.047024	0.863287	1180	2	-0.0045264	0.084108	0.17303	0.993072	3767	1	-0.0045264
hsa-mir-1302-10	4	0.015975	0.046985	0.863287	1178	2	-0.44401	0.74323	0.74394	1	15907	0	-0.44401
RPL3L	6	0.015978	0.046993	0.863287	1179	4	-0.43179	0.93048	0.93041	1	19909	0	-0.43179
OR52D1	6	0.016035	0.047147	0.864819	1181	4	-0.42033	0.74686	0.74735	1	15985	1	-0.42033
NBPF9	5	0.016072	0.047242	0.865821	1182	3	-0.45663	0.84272	0.84279	1	17989	0	-0.45663
PIK3C2A	6	0.016109	0.047342	0.866178	1183	4	-0.66315	0.32676	0.44429	1	9552	1	-0.66315
KDSR	6	0.01612	0.047373	0.866178	1184	3	-0.50006	0.9987	0.99871	1	21567	0	-0.50006
hsa-mir-101-1	4	0.016124	0.047381	0.866178	1185	1	-0.13741	0.5581	0.60053	1	12920	1	-0.13741
ZNF674	5	0.016151	0.047449	0.866691	1186	3	-0.60432	0.93425	0.93425	1	20006	0	-0.60432
C4orf40	6	0.016188	0.047544	0.867688	1187	1	0.20431	0.21059	0.32614	1	7024	2	0.20431
ATG16L1	6	0.016205	0.047595	0.867855	1188	4	-0.4974	0.85161	0.85175	1	18200	0	-0.4974
PDAP1	6	0.016224	0.047644	0.867855	1189	4	-0.73827	0.99903	0.99902	1	21584	0	-0.73827
SRGAP2B	4	0.016232	0.047673	0.867855	1190	3	-0.39644	0.98425	0.9842	1	21118	0	-0.39644
NDUFA2	6	0.016305	0.047874	0.870776	1191	4	-0.8828	0.99065	0.99066	1	21287	0	-0.8828
CCDC33	6	0.01635	0.047992	0.870985	1192	3	-0.18386	0.88146	0.88134	1	18834	0	-0.18386
SUGT1	4	0.016356	0.048007	0.870985	1193	2	-0.2595	0.57122	0.60902	1	13103	1	-0.2595
YIF1B	6	0.016373	0.048052	0.870985	1194	2	0.22376	0.78304	0.78294	1	16709	0	0.22376
TPI1	6	0.016373	0.048053	0.870985	1195	3	-0.66556	0.94924	0.94923	1	20323	0	-0.66556
SHMT1	6	0.016386	0.048087	0.870985	1196	1	0.021245	0.70603	0.71056	1	15204	1	0.021245
MMD	6	0.016403	0.048138	0.871184	1197	3	-0.33443	0.80368	0.80367	1	17167	0	-0.33443
NFU1	6	0.016425	0.048197	0.871291	1198	2	0.067308	0.0008781	0.0036612	0.673308	114	3	0.067308
FADS6	6	0.016439	0.048224	0.871291	1199	4	-0.56637	0.42416	0.52176	1	11231	1	-0.56637
EMC4	6	0.016485	0.048344	0.87139	1200	3	-0.41365	0.9946	0.99463	1	21414	0	-0.41365
RGPD3	6	0.016486	0.048345	0.87139	1201	2	0.29262	0.74857	0.74898	1	16017	1	0.29262
MRPL30	6	0.016487	0.04835	0.87139	1202	4	-0.5049	0.98906	0.98906	1	21243	0	-0.5049
SNX1	6	0.0166	0.048658	0.872578	1208	3	-0.24736	0.00015566	0.0007331	0.453748	35	2	-0.24736
POLR2G	6	0.016535	0.048488	0.872578	1203	2	-0.033186	0.84363	0.84371	1	18009	0	-0.033186
COPB2	6	0.016539	0.048501	0.872578	1204	2	0.5182	0.11503	0.22444	1	4859	3	0.5182
FRMPD4	6	0.016584	0.04861	0.872578	1205	1	0.29662	0.17951	0.29363	1	6298	2	0.29662
GOLGA6B	6	0.016596	0.048649	0.872578	1206	4	-0.41801	0.65338	0.66773	1	14304	1	-0.41801
FDPS	6	0.016598	0.048656	0.872578	1207	3	-0.68088	0.89073	0.89056	1	19023	0	-0.68088
FAM96A	6	0.016706	0.04895	0.874111	1212	2	0.43601	0.031048	0.080035	0.955945	1813	3	0.43601
SERTM1	6	0.016649	0.04879	0.874111	1209	4	-0.41872	0.96695	0.9669	1	20699	0	-0.41872
GPR45	6	0.016683	0.048883	0.874111	1210	2	-0.19377	0.71314	0.71672	1	15325	1	-0.19377
JTB	6	0.016695	0.048918	0.874111	1211	4	-0.48703	0.74261	0.74338	1	15895	1	-0.48703
NAPG	4	0.01672	0.048991	0.874111	1213	2	-1.2077	0.25604	0.37207	1	8008	1	-1.2077
FMO5	6	0.016729	0.049013	0.874111	1214	3	-0.47704	0.9826	0.98253	1	21068	0	-0.47704
PRKCA	6	0.016733	0.049026	0.874111	1215	2	0.19034	0.12499	0.2358	1	5081	2	0.19034
SEPHS1	6	0.016767	0.04911	0.874234	1216	3	-0.31313	0.93406	0.93407	1	19998	0	-0.31313
IRG1	6	0.016779	0.049141	0.874234	1217	3	-0.035925	0.35485	0.47326	1	10163	2	-0.035925
CDX2	6	0.016782	0.049154	0.874234	1218	1	0.29052	0.1918	0.30672	1	6587	1	0.29052
SPR	6	0.016805	0.049205	0.874426	1219	3	-0.63572	0.92973	0.92964	1	19891	0	-0.63572
C11orf30	6	0.016832	0.049276	0.874976	1220	2	-0.33898	0.97129	0.97118	1	20802	0	-0.33898
CDK7	6	0.01712	0.050045	0.875727	1235	3	-0.225	0.031692	0.081258	0.957346	1837	1	-0.225
FLVCR2	6	0.017338	0.05063	0.875727	1241	3	-0.31256	0.045158	0.10576	0.973465	2352	1	-0.31256
ARVCF	6	0.017406	0.050811	0.875727	1246	3	-0.32415	0.093312	0.18851	0.996014	4100	1	-0.32415
KIAA1024L	6	0.017046	0.049846	0.875727	1228	3	-0.31551	0.10014	0.2	0.997867	4338	1	-0.31551
COX6A1	6	0.017118	0.050042	0.875727	1234	3	-0.23888	0.10642	0.21037	0.998892	4557	2	-0.23888
PCGF2	6	0.016881	0.049416	0.875727	1221	1	0.039427	0.17885	0.29295	1	6283	1	0.039427
hsa-mir-1237	4	0.016885	0.049428	0.875727	1222	1	0.016951	0.67507	0.68476	1	14667	0	0.016951
MAGEB10	6	0.016931	0.049558	0.875727	1223	3	-0.41454	0.99684	0.99688	1	21490	0	-0.41454
LITAF	6	0.017015	0.049773	0.875727	1224	4	-0.69418	0.99828	0.9983	1	21546	0	-0.69418
ZNF506	6	0.017015	0.049773	0.875727	1225	3	-1.6451	0.80399	0.80399	1	17173	0	-1.6451
SLC35A2	6	0.017023	0.049794	0.875727	1226	4	-0.65511	0.97699	0.97695	1	20936	0	-0.65511
C1GALT1C1	6	0.017035	0.049824	0.875727	1227	3	-0.38008	0.62335	0.64526	1	13853	1	-0.38008
hsa-mir-4767	4	0.01706	0.049893	0.875727	1229	2	-0.56087	0.42373	0.52154	1	11224	1	-0.56087
CD9	6	0.017064	0.049903	0.875727	1230	4	-0.43015	0.91059	0.91049	1	19456	0	-0.43015
GGPS1	6	0.017079	0.049941	0.875727	1231	4	-0.5569	0.9595	0.95952	1	20537	0	-0.5569
KLF14	6	0.017092	0.04997	0.875727	1232	3	-0.32686	0.68221	0.69052	1	14769	1	-0.32686
SART3	6	0.017095	0.04998	0.875727	1233	4	-1.0636	0.99751	0.99754	1	21519	0	-1.0636
ARPC2	6	0.017129	0.050073	0.875727	1236	3	-0.55972	0.87244	0.8725	1	18628	0	-0.55972
KRBOX4	6	0.017209	0.050291	0.875727	1237	4	-0.39775	0.99472	0.99476	1	21420	0	-0.39775
ZFP82	6	0.017232	0.050349	0.875727	1238	4	-0.61903	0.95378	0.95375	1	20422	0	-0.61903
TFG	6	0.017315	0.050566	0.875727	1239	3	-0.26065	0.78783	0.78783	1	16828	0	-0.26065
FAM169A	6	0.017336	0.050626	0.875727	1240	2	-0.34075	0.98384	0.98381	1	21103	0	-0.34075
MKI67IP	6	0.017344	0.050646	0.875727	1242	2	0.21143	0.16736	0.28065	1	6014	2	0.21143
ITGAD	6	0.017376	0.050726	0.875727	1243	3	-0.20283	0.22442	0.34009	1	7325	1	-0.20283
SF3B1	6	0.017377	0.050727	0.875727	1244	4	-1.0574	0.99637	0.99641	1	21464	0	-1.0574
SNX5	6	0.017398	0.050792	0.875727	1245	3	-0.43099	0.58063	0.61529	1	13235	1	-0.43099
ALG8	6	0.017423	0.050864	0.875727	1247	4	-0.54209	0.84805	0.84815	1	18120	0	-0.54209
CNTN1	6	0.017426	0.050872	0.875727	1248	1	-0.42114	0.87646	0.87648	1	18699	0	-0.42114
AMIGO1	6	0.017431	0.050885	0.875727	1249	3	-0.66752	0.88445	0.88426	1	18895	0	-0.66752
IL1R1	6	0.017439	0.050906	0.875727	1250	4	-0.53046	0.31496	0.43214	1	9299	2	-0.53046
REXO2	6	0.017446	0.050924	0.875727	1251	3	-0.39805	0.17441	0.2882	1	6182	2	-0.39805
PAQR6	6	0.017452	0.050938	0.875727	1252	4	-0.70027	0.81554	0.81549	1	17421	0	-0.70027
hsa-mir-6810	4	0.017469	0.050988	0.875727	1253	3	-0.77807	0.99364	0.99362	1	21387	0	-0.77807
OAZ3	6	0.017475	0.051003	0.875727	1254	2	-0.50645	0.36659	0.4855	1	10441	1	-0.50645
MTCH2	6	0.017507	0.051091	0.875727	1255	3	-0.37353	0.98244	0.98238	1	21063	0	-0.37353
C16orf59	6	0.017528	0.051136	0.875727	1256	4	-0.35434	0.47703	0.5511	1	11893	1	-0.35434
PFDN1	6	0.01754	0.051165	0.875727	1257	3	-0.34986	0.81734	0.8173	1	17472	0	-0.34986
BCAR3	6	0.017543	0.051174	0.875727	1258	3	-0.47066	0.5208	0.57701	1	12425	1	-0.47066
ANO1	6	0.017551	0.051198	0.875727	1259	4	-0.45537	0.95749	0.95747	1	20498	0	-0.45537
ST6GALNAC2	6	0.017554	0.051205	0.875727	1260	4	-0.46878	0.18602	0.30051	1	6456	1	-0.46878
S100A16	6	0.01757	0.051248	0.875727	1261	4	-0.32829	0.87163	0.87169	1	18620	0	-0.32829
GPR146	6	0.017574	0.051262	0.875727	1262	3	-0.43453	0.91204	0.91196	1	19484	0	-0.43453
CDH15	6	0.01758	0.051283	0.875727	1263	4	-0.57864	0.91908	0.91902	1	19653	0	-0.57864
hsa-mir-660	4	0.017612	0.051361	0.875727	1264	2	-0.37592	0.54513	0.59225	1	12739	1	-0.37592
GLG1	6	0.017624	0.051399	0.875727	1265	2	-0.31849	0.85846	0.85861	1	18350	0	-0.31849
SDCBP2	6	0.017624	0.0514	0.875727	1266	3	-0.32012	0.43257	0.52626	1	11329	1	-0.32012
SULT1A3	5	0.017629	0.051413	0.875727	1267	3	-0.55043	0.71769	0.72078	1	15423	0	-0.55043
DLG1	6	0.017629	0.051413	0.875727	1268	3	-0.29727	0.76278	0.76277	1	16303	1	-0.29727
RRM2	6	0.017632	0.051419	0.875727	1269	2	0.17366	0.16947	0.28295	1	6055	2	0.17366
2018-03-08	6	0.017633	0.051423	0.875727	1270	3	-0.4198	0.96705	0.967	1	20706	0	-0.4198
WAS	6	0.017673	0.051532	0.875727	1271	1	-0.096217	0.93691	0.93688	1	20053	0	-0.096217
LAMP2	6	0.017692	0.051587	0.875727	1272	3	-0.30353	0.2922	0.40887	1	8787	2	-0.30353
ATP5A1	6	0.017694	0.051594	0.875727	1273	4	-0.66434	0.62908	0.64939	1	13939	1	-0.66434
TMPRSS11B	6	0.017697	0.051606	0.875727	1274	4	-0.48074	0.76541	0.76544	1	16357	0	-0.48074
OR4A5	6	0.017715	0.051656	0.875727	1275	4	-0.38374	0.84413	0.84421	1	18027	0	-0.38374
CPEB4	6	0.017717	0.051665	0.875727	1276	2	-0.11835	0.81154	0.8115	1	17330	0	-0.11835
hsa-mir-27a	4	0.017721	0.051671	0.875727	1277	2	-0.092435	0.66586	0.67744	1	14514	0	-0.092435
SF3B4	6	0.017723	0.051679	0.875727	1278	2	-1.131	0.3486	0.4668	1	10028	1	-1.131
KRBA2	6	0.017731	0.051704	0.875727	1279	4	-0.39433	0.81936	0.81939	1	17521	0	-0.39433
KANK2	6	0.017819	0.051942	0.875949	1281	2	-0.72453	0.039829	0.096163	0.970308	2142	1	-0.72453
TRA2B	6	0.017835	0.051981	0.875949	1283	4	-0.53811	0.04332	0.10244	0.971817	2280	2	-0.53811
CINP	6	0.018082	0.052606	0.875949	1297	3	-0.45055	0.07129	0.1514	0.985762	3324	1	-0.45055
TUBA8	6	0.017798	0.051879	0.875949	1280	4	-0.38429	0.99869	0.9987	1	21566	0	-0.38429
ACSL5	6	0.017825	0.051954	0.875949	1282	3	-0.3498	0.96145	0.96143	1	20584	0	-0.3498
POLD2	6	0.017856	0.052026	0.875949	1284	4	-0.64911	0.90827	0.90815	1	19412	0	-0.64911
EED	6	0.017883	0.052089	0.875949	1285	4	-0.73549	0.73245	0.73401	1	15703	1	-0.73549
EEF1B2	6	0.017906	0.052148	0.875949	1286	2	-0.29273	0.70085	0.70605	1	15107	1	-0.29273
ANKS3	6	0.017912	0.052167	0.875949	1287	4	-0.47852	0.6436	0.66021	1	14161	1	-0.47852
LOC440335	6	0.017923	0.0522	0.875949	1288	4	-0.46706	0.21757	0.33309	1	7184	1	-0.46706
CEP55	6	0.017929	0.052215	0.875949	1289	2	0.25164	0.65501	0.66902	1	14337	1	0.25164
MARS	6	0.017942	0.052242	0.875949	1290	4	-0.43059	0.78406	0.78397	1	16738	0	-0.43059
UBE2D3	6	0.017976	0.052335	0.875949	1291	2	-0.38336	0.9961	0.99615	1	21455	0	-0.38336
GADD45B	6	0.01801	0.052427	0.875949	1292	3	-0.27977	0.38618	0.50192	1	10795	1	-0.27977
GDF15	6	0.018027	0.052465	0.875949	1293	4	-0.70647	0.88985	0.8897	1	19003	0	-0.70647
ESYT1	6	0.018054	0.052539	0.875949	1294	4	-0.67266	0.21372	0.32926	1	7100	1	-0.67266
LYPLAL1	6	0.018076	0.05259	0.875949	1295	4	-0.44299	0.62672	0.64766	1	13903	1	-0.44299
YY1	6	0.018079	0.052601	0.875949	1296	2	-0.45621	0.21986	0.3354	1	7231	1	-0.45621
ABL2	6	0.018093	0.052636	0.875949	1298	3	-0.28502	0.8983	0.89821	1	19205	0	-0.28502
hsa-mir-548h-3	4	0.018108	0.052667	0.875949	1299	2	-0.60896	0.7692	0.76924	1	16432	0	-0.60896
NAB1	6	0.018108	0.052667	0.875949	1300	4	-0.49107	0.99654	0.99657	1	21478	0	-0.49107
CMAS	6	0.018119	0.05269	0.875949	1301	3	-0.65961	0.97502	0.97499	1	20896	0	-0.65961
LRP1	6	0.018121	0.052696	0.875949	1302	4	-0.49278	0.22209	0.3377	1	7274	2	-0.49278
RBMS2	6	0.018125	0.052709	0.875949	1303	3	-0.37646	0.7155	0.71883	1	15385	1	-0.37646
FOXP4	6	0.018148	0.05276	0.875949	1304	4	-0.38686	0.52156	0.57745	1	12431	1	-0.38686
URGCP-MRPS24	1	0.018152	0.052768	0.875949	1305	1	-1.3168	0.98185	0.98179	1	21049	0	-1.3168
CHMP6	6	0.018181	0.052841	0.876484	1306	3	-0.50133	0.93354	0.93352	1	19983	0	-0.50133
MRPL14	6	0.018197	0.052886	0.876571	1307	2	-0.87813	0.7353	0.7366	1	15758	1	-0.87813
MACC1	6	0.018226	0.052961	0.876786	1308	4	-0.32742	0.67136	0.68176	1	14604	1	-0.32742
ZSCAN5A	6	0.018253	0.053028	0.876786	1309	2	0.052792	0.34094	0.45885	1	9867	1	0.052792
VCX	6	0.018262	0.053056	0.876786	1310	4	-0.37168	0.64608	0.66212	1	14195	1	-0.37168
FAM175B	6	0.018267	0.053073	0.876786	1311	3	-0.29782	0.13676	0.24824	1	5349	2	-0.29782
PRKCB	6	0.018317	0.053201	0.876786	1312	2	-0.016307	0.37425	0.49341	1	10615	2	-0.016307
POLD4	6	0.01832	0.053211	0.876786	1313	3	-0.24535	0.70243	0.7074	1	15131	1	-0.24535
SLC6A20	6	0.018332	0.053239	0.876786	1314	4	-0.37719	0.19863	0.31395	1	6746	1	-0.37719
SERP2	6	0.018348	0.053281	0.876786	1315	2	-0.14666	0.80667	0.80668	1	17239	0	-0.14666
PLCB3	6	0.018352	0.053294	0.876786	1316	3	-0.64521	0.6614	0.67399	1	14434	1	-0.64521
GTF3C2	6	0.018378	0.053363	0.876786	1317	4	-0.61003	0.93593	0.93591	1	20036	0	-0.61003
NR3C2	6	0.018384	0.053378	0.876786	1318	4	-0.57302	0.50355	0.56656	1	12228	1	-0.57302
CHTF18	6	0.018386	0.053385	0.876786	1319	4	-0.42638	0.96774	0.96773	1	20727	0	-0.42638
SPTBN2	6	0.018415	0.053471	0.877539	1320	2	-0.36658	0.99822	0.99826	1	21543	0	-0.36658
CASQ2	6	0.018443	0.053536	0.877939	1321	4	-0.37795	0.22884	0.34456	1	7412	1	-0.37795
CTF1	6	0.018465	0.053605	0.878406	1322	3	-0.29281	0.65915	0.67224	1	14402	1	-0.29281
CLASRP	6	0.018514	0.053724	0.879688	1323	3	-0.38137	0.58078	0.61539	1	13239	1	-0.38137
FBXO11	6	0.018571	0.053887	0.881693	1324	3	-0.80212	0.53491	0.58582	1	12609	1	-0.80212
ALG10B	6	0.018587	0.053932	0.881752	1325	2	-0.014393	0.78464	0.78455	1	16754	0	-0.014393
ABCB8	6	0.019021	0.055045	0.882161	1351	2	0.17353	0.044022	0.10371	0.973339	2305	3	0.17353
FAM161A	6	0.018947	0.054865	0.882161	1342	4	-0.55583	0.070582	0.1502	0.98558	3300	1	-0.55583
HIRA	6	0.018627	0.054044	0.882161	1326	4	-0.38811	0.81948	0.81951	1	17525	0	-0.38811
NAE1	6	0.018667	0.054152	0.882161	1327	3	-0.62733	0.98101	0.98097	1	21030	0	-0.62733
C20orf166	6	0.01867	0.054158	0.882161	1328	3	-0.66158	0.72325	0.72579	1	15523	1	-0.66158
BUB3	6	0.018748	0.054372	0.882161	1329	4	-0.55832	0.56549	0.60524	1	13020	1	-0.55832
PDIA3	6	0.018755	0.054386	0.882161	1330	2	-0.29383	0.91848	0.91843	1	19636	0	-0.29383
RARS2	6	0.018828	0.054564	0.882161	1331	3	-1.2581	0.13934	0.25098	1	5415	1	-1.2581
TIGD7	6	0.018836	0.05458	0.882161	1332	2	0.15761	0.57574	0.612	1	13167	1	0.15761
PDX1	6	0.018868	0.054659	0.882161	1333	2	-0.1282	0.7455	0.74603	1	15956	1	-0.1282
NOP10	6	0.018886	0.054706	0.882161	1334	4	-0.79006	0.58318	0.61702	1	13267	1	-0.79006
RPS19	6	0.018889	0.054712	0.882161	1335	3	-0.76896	0.68969	0.69663	1	14915	1	-0.76896
TMEM11	6	0.018891	0.054722	0.882161	1336	4	-0.56529	0.38481	0.50123	1	10781	1	-0.56529
SCN7A	6	0.018902	0.054753	0.882161	1337	4	-0.64162	0.52436	0.57922	1	12469	1	-0.64162
CHRNB2	6	0.01891	0.054769	0.882161	1338	2	-0.30599	0.95072	0.95069	1	20358	0	-0.30599
ZDHHC23	6	0.018916	0.054785	0.882161	1339	2	-0.27619	0.6492	0.66454	1	14248	1	-0.27619
CST3	6	0.018933	0.054826	0.882161	1340	4	-0.56937	0.3293	0.4469	1	9607	2	-0.56937
ZNHIT6	6	0.018936	0.054837	0.882161	1341	4	-0.66059	0.93447	0.93447	1	20009	0	-0.66059
TMEM63A	6	0.018959	0.054894	0.882161	1343	1	0.15964	0.34069	0.4586	1	9862	1	0.15964
HM13	6	0.018966	0.054912	0.882161	1344	4	-1.3478	0.93183	0.93178	1	19947	0	-1.3478
FAM60A	6	0.018966	0.054912	0.882161	1345	3	-0.5152	0.98615	0.98611	1	21169	0	-0.5152
C19orf53	6	0.018969	0.054922	0.882161	1346	4	-0.44534	0.70028	0.70555	1	15095	1	-0.44534
hsa-mir-6816	4	0.018999	0.054991	0.882161	1347	2	-0.99347	0.60527	0.63235	1	13586	1	-0.99347
LHFP	6	0.019	0.054991	0.882161	1348	4	-0.68326	0.5307	0.58309	1	12546	1	-0.68326
ALKBH5	6	0.019002	0.055001	0.882161	1349	4	-0.52382	0.97474	0.9747	1	20887	0	-0.52382
PDLIM1	6	0.019011	0.055017	0.882161	1350	3	-0.38622	0.62163	0.64404	1	13830	1	-0.38622
C11orf88	6	0.019041	0.055093	0.882161	1352	4	-0.51073	0.63871	0.65657	1	14095	1	-0.51073
MUC4	6	0.019047	0.055103	0.882161	1353	4	-0.41516	0.86907	0.86911	1	18564	0	-0.41516
PHF8	6	0.019058	0.055138	0.882161	1354	2	0.25906	0.82276	0.82277	1	17593	0	0.25906
QRSL1	6	0.019206	0.055527	0.885385	1356	1	-0.15494	0.093867	0.18944	0.99608	4115	1	-0.15494
VWCE	6	0.019157	0.055386	0.885385	1355	1	-0.19393	0.93828	0.93823	1	20086	0	-0.19393
ACTL6A	6	0.019231	0.055597	0.885385	1357	4	-0.39181	0.99742	0.99746	1	21515	0	-0.39181
CALN1	6	0.019241	0.055623	0.885385	1358	3	-0.68094	0.95053	0.9505	1	20352	0	-0.68094
OR1I1	6	0.019257	0.055667	0.885385	1359	4	-0.46396	0.15071	0.26312	1	5669	1	-0.46396
EAF1	6	0.019261	0.055675	0.885385	1360	4	-0.48393	0.82986	0.82984	1	17723	0	-0.48393
TARDBP	6	0.019265	0.055682	0.885385	1361	3	-0.66604	0.48782	0.55738	1	12021	1	-0.66604
WASF3	6	0.01928	0.055715	0.885385	1362	3	0.038736	0.12586	0.23671	1	5105	2	0.038736
TVP23A	6	0.019304	0.055777	0.885385	1363	3	-0.29672	0.9608	0.96079	1	20569	0	-0.29672
C16orf54	6	0.019305	0.05578	0.885385	1364	2	-0.30358	0.682	0.69034	1	14765	1	-0.30358
hsa-mir-3911	4	0.019333	0.055855	0.885385	1365	2	-0.85877	0.86056	0.86069	1	18398	0	-0.85877
C11orf40	6	0.019335	0.055859	0.885385	1366	3	-0.72243	0.98433	0.98427	1	21122	0	-0.72243
RAB33B	6	0.01934	0.05587	0.885385	1367	3	-0.38544	0.97652	0.97647	1	20925	0	-0.38544
hsa-mir-3198-1	4	0.019363	0.055941	0.885412	1368	3	-0.68068	0.98796	0.98794	1	21225	0	-0.68068
MMP25	6	0.019381	0.055987	0.885412	1369	3	-0.55282	0.93522	0.93522	1	20025	0	-0.55282
ADAMTS2	6	0.019386	0.055995	0.885412	1370	3	-0.16559	0.56956	0.60792	1	13074	1	-0.16559
PARD3	6	0.019404	0.056052	0.885676	1371	1	0.19749	0.38922	0.50349	1	10826	1	0.19749
CFH	6	0.019454	0.056196	0.887304	1372	1	0.098474	0.92966	0.92956	1	19890	0	0.098474
FTSJ1	6	0.019503	0.056325	0.888684	1373	2	-0.058865	0.58712	0.61972	1	13329	1	-0.058865
VCX3A	2	0.01955	0.056463	0.889222	1374	1	-0.70516	0.93494	0.93494	1	20019	0	-0.70516
ACSM1	6	0.019551	0.056464	0.889222	1375	3	-0.46649	0.75581	0.75592	1	16157	1	-0.46649
LSM12	6	0.019557	0.056482	0.889222	1376	3	-0.43641	0.94518	0.94516	1	20236	0	-0.43641
CALCOCO1	6	0.019581	0.056548	0.889619	1377	4	-0.42098	0.53425	0.58538	1	12598	1	-0.42098
OCM	6	0.019602	0.056605	0.889864	1378	3	-0.3081	0.76707	0.76712	1	16387	0	-0.3081
ICT1	6	0.019641	0.056705	0.89059	1379	4	-0.53661	0.91348	0.91342	1	19510	0	-0.53661
RHOXF1	6	0.019651	0.056733	0.89059	1380	3	-0.13761	0.89035	0.8902	1	19013	0	-0.13761
PRAF2	6	0.019701	0.056865	0.890971	1381	2	-0.35857	0.42899	0.52437	1	11287	1	-0.35857
MRPS12	6	0.019704	0.056876	0.890971	1382	3	-0.87099	0.13503	0.24642	1	5310	2	-0.87099
NR2F6	6	0.019706	0.056881	0.890971	1383	4	-0.85423	0.97026	0.97016	1	20781	0	-0.85423
CD200R1L	6	0.019737	0.056956	0.8913	1384	2	-0.11664	0.12555	0.2364	1	5096	1	-0.11664
APOA1	6	0.019749	0.056984	0.8913	1385	4	-0.45284	0.91694	0.91691	1	19593	0	-0.45284
CS	6	0.01977	0.057044	0.891449	1386	3	-0.2978	0.97468	0.97465	1	20885	0	-0.2978
TRAP1	6	0.019784	0.057078	0.891449	1387	3	-0.46859	0.91189	0.91181	1	19478	0	-0.46859
C9orf171	6	0.019799	0.057117	0.891449	1388	2	0.42332	0.71158	0.71538	1	15297	1	0.42332
DDX54	6	0.019829	0.057189	0.89192	1389	4	-0.51412	0.74003	0.74094	1	15849	1	-0.51412
NCAPD3	6	0.019847	0.057241	0.89209	1390	3	-0.30333	0.32727	0.4448	1	9561	1	-0.30333
BNC2	6	0.019887	0.057347	0.892351	1391	4	-0.31976	0.36298	0.48173	1	10360	1	-0.31976
C2CD5	6	0.019897	0.057379	0.892351	1392	3	-0.37874	0.41916	0.51909	1	11174	1	-0.37874
DIO3	6	0.019898	0.057381	0.892351	1393	2	-0.17217	0.85032	0.85047	1	18170	0	-0.17217
STAP1	6	0.019948	0.057503	0.893057	1394	3	0.46204	0.0056514	0.018798	0.834036	485	3	0.46204
USP50	6	0.020088	0.057871	0.893057	1402	4	-0.45981	0.005837	0.019315	0.834036	497	2	-0.45981
KCNJ10	6	0.019997	0.057628	0.893057	1397	1	-0.075513	0.074026	0.15601	0.986272	3426	1	-0.075513
STX3	6	0.019956	0.05753	0.893057	1395	3	-0.077991	0.18826	0.30288	1	6509	2	-0.077991
hsa-mir-3607	1	0.019986	0.057603	0.893057	1396	1	-1.0569	0.98001	0.97999	1	21007	0	-1.0569
CYP27B1	6	0.020015	0.057674	0.893057	1398	4	-0.64742	0.94045	0.9404	1	20126	0	-0.64742
EMC1	6	0.020019	0.057686	0.893057	1399	4	-0.71076	0.99426	0.99429	1	21403	0	-0.71076
ATP2A1	6	0.020046	0.057759	0.893057	1400	2	-0.13632	0.45575	0.53898	1	11600	1	-0.13632
NCOR1	6	0.020083	0.05786	0.893057	1401	3	-0.44213	0.98693	0.98689	1	21196	0	-0.44213
LSM5	6	0.020108	0.05792	0.893057	1403	2	-0.45405	0.93761	0.93757	1	20069	0	-0.45405
MAP1S	6	0.020112	0.05793	0.893057	1404	3	-0.39745	0.9401	0.94006	1	20119	0	-0.39745
SOCS3	6	0.020124	0.057961	0.893057	1405	3	-0.26348	0.30435	0.42125	1	9072	1	-0.26348
FAM83G	6	0.020126	0.057962	0.893057	1406	4	-0.52008	0.77839	0.77836	1	16619	0	-0.52008
PPM1F	6	0.020163	0.058055	0.893773	1407	4	-0.30402	0.84391	0.84399	1	18019	0	-0.30402
SOAT1	6	0.020194	0.058137	0.893773	1408	3	-0.5858	0.93163	0.93157	1	19939	0	-0.5858
TMEM219	6	0.020201	0.058152	0.893773	1409	4	-0.4941	0.9767	0.97666	1	20931	0	-0.4941
S100A14	6	0.020216	0.058196	0.893773	1410	3	-0.3321	0.27033	0.38662	1	8288	2	-0.3321
AKIRIN1	6	0.020227	0.058215	0.893773	1411	4	-0.36499	0.78635	0.78629	1	16786	0	-0.36499
DNPEP	6	0.020249	0.058279	0.894122	1412	2	-0.39207	0.92412	0.92407	1	19764	0	-0.39207
TTC21A	6	0.020293	0.058397	0.89529	1413	1	0.25705	0.10657	0.21063	0.998892	4563	3	0.25705
RNF148	6	0.020326	0.058488	0.896064	1414	4	-0.40364	0.92442	0.92437	1	19771	0	-0.40364
OR52I1	6	0.020392	0.058669	0.896081	1418	2	0.3399	0.021836	0.062425	0.927712	1455	3	0.3399
C15orf26	6	0.020366	0.058601	0.896081	1415	3	-0.57124	0.6296	0.6498	1	13948	1	-0.57124
GRAPL	2	0.020367	0.058603	0.896081	1416	2	-0.64411	0.97963	0.97961	1	20995	0	-0.64411
ARMCX5-GPRASP2	6	0.020375	0.058623	0.896081	1417	3	-0.57602	0.96666	0.96663	1	20693	0	-0.57602
RBM10	6	0.0204	0.058696	0.896081	1419	3	-1.3148	0.74222	0.743	1	15888	1	-1.3148
FOXO3	6	0.020418	0.058753	0.89627	1420	3	-0.62127	0.070251	0.14964	0.984681	3292	1	-0.62127
SFR1	6	0.020432	0.058791	0.89627	1421	3	0.12684	0.13191	0.24313	1	5243	2	0.12684
TRAPPC3	6	0.020457	0.058863	0.896725	1422	2	0.0047217	0.083548	0.17207	0.993072	3744	1	0.0047217
ZAR1	6	0.020504	0.058982	0.897281	1424	4	-0.41336	0.018415	0.053558	0.923377	1252	1	-0.41336
CD244	6	0.02049	0.058946	0.897281	1423	3	-0.30389	0.9753	0.97527	1	20898	0	-0.30389
YWHAZ	6	0.020563	0.059128	0.89841	1425	3	-0.31463	0.0083834	0.026443	0.873227	656	1	-0.31463
hsa-mir-4316	4	0.020732	0.059551	0.89841	1435	2	-0.4937	0.051944	0.11774	0.975627	2610	1	-0.4937
hsa-mir-4712	4	0.02058	0.059172	0.89841	1426	3	-2.0487	0.93858	0.93851	1	20095	0	-2.0487
FGD4	6	0.020599	0.059222	0.89841	1427	2	-0.045796	0.63059	0.65051	1	13966	1	-0.045796
LXN	6	0.020601	0.059229	0.89841	1428	4	-0.51771	0.83092	0.83091	1	17738	0	-0.51771
ELOVL2	6	0.020622	0.059285	0.89841	1429	4	-0.59863	0.31156	0.42864	1	9224	1	-0.59863
TEKT5	6	0.020636	0.059318	0.89841	1430	4	-0.41173	0.97386	0.97381	1	20862	0	-0.41173
GLYATL1	6	0.020666	0.059391	0.89841	1431	4	-0.41533	0.3467	0.46481	1	9987	1	-0.41533
NTRK1	6	0.020675	0.059411	0.89841	1432	4	-0.42121	0.4814	0.55363	1	11952	1	-0.42121
IL20	6	0.020713	0.0595	0.89841	1433	4	-0.35488	0.21424	0.32977	1	7117	2	-0.35488
PMEL	6	0.020725	0.059533	0.89841	1434	4	-0.39794	0.82163	0.82167	1	17571	0	-0.39794
hsa-mir-6089-1	4	0.020745	0.059586	0.89841	1436	3	-0.46779	0.99129	0.99128	1	21313	0	-0.46779
UBE2Q1	6	0.020751	0.059595	0.89841	1437	4	-0.76037	0.80943	0.80937	1	17291	0	-0.76037
NARG2	6	0.020836	0.059823	0.898709	1441	3	-0.53154	0.011369	0.034717	0.87963	851	2	-0.53154
ACO2	6	0.020855	0.059864	0.898709	1443	3	-0.52854	0.025859	0.070132	0.947969	1599	1	-0.52854
GTPBP3	6	0.020775	0.059662	0.898709	1438	4	-0.86508	0.77787	0.77783	1	16612	0	-0.86508
C6orf203	6	0.020791	0.059708	0.898709	1439	2	0.068288	0.7546	0.7548	1	16140	1	0.068288
PTAR1	6	0.020808	0.059753	0.898709	1440	3	-0.40631	0.81911	0.81913	1	17517	0	-0.40631
RCOR2	6	0.020846	0.059846	0.898709	1442	3	-0.57635	0.88427	0.8841	1	18892	0	-0.57635
ZNF174	6	0.020886	0.059942	0.899259	1444	1	-0.24895	0.89754	0.89743	1	19182	0	-0.24895
SLC10A7	6	0.020967	0.060169	0.900802	1446	3	-0.46547	0.017277	0.050556	0.922241	1187	2	-0.46547
NonTargetingControlGuideForHuman_0998	1	0.020957	0.060141	0.900802	1445	1	-0.49522	0.97904	0.979	1	20984	0	-0.49522
PRSS21	6	0.020968	0.06017	0.900802	1447	3	-0.43499	0.90658	0.90644	1	19382	0	-0.43499
ARHGAP17	6	0.021018	0.060292	0.90126	1448	4	-0.63736	0.83456	0.83466	1	17806	0	-0.63736
hsa-mir-7106	4	0.021021	0.060298	0.90126	1449	2	-0.57138	0.28693	0.4035	1	8662	1	-0.57138
TSSK6	6	0.021034	0.060325	0.90126	1450	1	-0.096274	0.92123	0.92115	1	19699	0	-0.096274
HEATR6	6	0.021059	0.060387	0.90156	1451	3	-0.47914	0.28506	0.40162	1	8624	2	-0.47914
USP17L8	6	0.021132	0.060577	0.902103	1454	3	0.10534	0.045547	0.10642	0.974325	2365	3	0.10534
THADA	6	0.02112	0.060543	0.902103	1452	4	-0.54311	0.79437	0.79435	1	16964	0	-0.54311
LRRC15	6	0.021132	0.060577	0.902103	1453	1	0.14285	0.16973	0.28323	1	6062	2	0.14285
RAC2	6	0.021137	0.06059	0.902103	1455	3	-0.75826	0.9749	0.97486	1	20891	0	-0.75826
ACTL6B	6	0.021162	0.060651	0.902388	1456	4	-0.49245	0.99862	0.99864	1	21560	0	-0.49245
ZNF785	6	0.021186	0.06071	0.902426	1457	4	-0.59443	0.88713	0.88698	1	18951	0	-0.59443
TRMT61A	6	0.021196	0.060737	0.902426	1458	2	-0.05336	0.14473	0.25674	1	5532	2	-0.05336
SPAG11A	6	0.021231	0.060829	0.903185	1459	3	-0.27875	0.56821	0.60701	1	13055	1	-0.27875
TMOD4	6	0.021267	0.06092	0.903712	1460	4	-0.5049	0.32972	0.44733	1	9613	1	-0.5049
GPN1	6	0.02128	0.060956	0.903712	1461	2	-0.36102	0.97938	0.97935	1	20991	0	-0.36102
hsa-mir-7856	4	0.021295	0.060996	0.903712	1462	3	-0.75226	0.99067	0.99068	1	21290	0	-0.75226
MRAP2	6	0.021311	0.06104	0.903712	1463	3	-0.14871	0.55664	0.59959	1	12898	1	-0.14871
GPC1	6	0.021324	0.061073	0.903712	1464	3	0.15648	0.11648	0.2268	1	4901	2	0.15648
RIMBP3B	6	0.02136	0.061166	0.904461	1465	4	-0.29326	0.99808	0.99811	1	21538	0	-0.29326
HSPA8	6	0.021393	0.061243	0.904753	1466	4	-0.69884	0.59128	0.62262	1	13382	1	-0.69884
RSRC2	6	0.021405	0.061269	0.904753	1467	4	-0.49278	0.55125	0.59617	1	12834	1	-0.49278
C9orf114	6	0.021428	0.061336	0.905128	1468	3	-1.2195	0.41419	0.51648	1	11118	1	-1.2195
PAGR1	6	0.02146	0.061405	0.905523	1469	3	-0.34552	0.99859	0.9986	1	21559	0	-0.34552
RNASE1	6	0.021872	0.06252	0.905703	1492	1	0.27817	0.034352	0.086241	0.959544	1947	3	0.27817
NDUFAF5	6	0.021906	0.062614	0.905703	1495	3	-0.64757	0.082286	0.16995	0.993072	3699	1	-0.64757
GSTT2B	2	0.02153	0.061604	0.905703	1470	2	-1.3794	0.97847	0.97842	1	20967	0	-1.3794
ZNF552	6	0.021536	0.061619	0.905703	1471	2	-0.66846	0.23682	0.35267	1	7596	1	-0.66846
OR9G1	6	0.021553	0.061667	0.905703	1472	3	-0.34964	0.79201	0.79204	1	16921	0	-0.34964
AP1M1	6	0.021575	0.061715	0.905703	1473	4	-0.47123	0.46276	0.54288	1	11700	1	-0.47123
RBM28	6	0.021583	0.061741	0.905703	1474	3	-0.6972	0.56471	0.60477	1	13012	1	-0.6972
PTGFRN	6	0.02159	0.06176	0.905703	1475	4	-0.3074	0.83063	0.83063	1	17733	0	-0.3074
WDR83OS	6	0.021597	0.061778	0.905703	1476	3	-0.25218	0.28239	0.3989	1	8566	1	-0.25218
SCGB1D4	6	0.021605	0.061796	0.905703	1477	4	-0.5032	0.96155	0.96153	1	20586	0	-0.5032
COPS7A	6	0.021605	0.061798	0.905703	1478	3	-0.076455	0.48363	0.55495	1	11972	1	-0.076455
NLE1	6	0.021694	0.062047	0.905703	1479	3	-0.41971	0.69053	0.69732	1	14926	1	-0.41971
PLAGL2	6	0.021696	0.06206	0.905703	1480	4	-0.30779	0.4699	0.54697	1	11806	1	-0.30779
hsa-mir-3909	4	0.021703	0.062072	0.905703	1481	1	0.38678	0.14774	0.25993	1	5612	2	0.38678
SERP1	6	0.021707	0.062083	0.905703	1482	3	-0.49754	0.5038	0.5667	1	12231	1	-0.49754
SAMD4B	6	0.021716	0.062109	0.905703	1483	3	-0.70009	0.92748	0.9274	1	19844	0	-0.70009
IL3	6	0.021724	0.062131	0.905703	1484	3	-0.3932	0.31322	0.43035	1	9266	2	-0.3932
ZNF12	6	0.021756	0.062217	0.905703	1485	3	-0.22824	0.21536	0.33086	1	7138	2	-0.22824
TSEN34	6	0.021769	0.062254	0.905703	1486	3	-0.23333	0.43429	0.52718	1	11349	1	-0.23333
hsa-mir-1266	4	0.021779	0.062286	0.905703	1487	3	-0.54191	0.91029	0.9102	1	19449	0	-0.54191
AMY1A	6	0.021823	0.062392	0.905703	1488	1	-0.15275	0.9582	0.9582	1	20513	0	-0.15275
RBFA	6	0.021827	0.062402	0.905703	1489	2	-0.14375	0.35116	0.46948	1	10087	1	-0.14375
GNRHR	6	0.021853	0.062473	0.905703	1490	2	0.20531	0.32131	0.43867	1	9433	2	0.20531
SPERT	6	0.02187	0.062516	0.905703	1491	2	0.23268	0.22457	0.34024	1	7329	2	0.23268
TBK1	6	0.021875	0.062534	0.905703	1493	3	-0.44242	0.21724	0.33277	1	7173	1	-0.44242
ATP5L	6	0.021879	0.062542	0.905703	1494	3	-1.1873	0.99416	0.99417	1	21399	0	-1.1873
UGGT1	6	0.021921	0.062646	0.905703	1496	1	0.054869	0.77017	0.77018	1	16451	0	0.054869
CA10	6	0.021922	0.062646	0.905703	1497	3	-0.53591	0.7746	0.77457	1	16538	0	-0.53591
MGP	6	0.021929	0.062659	0.905703	1498	3	-0.35036	0.37784	0.49715	1	10701	1	-0.35036
FAM171B	6	0.021935	0.062671	0.905703	1499	4	-0.44777	0.99325	0.99322	1	21375	0	-0.44777
KDELC2	6	0.021953	0.06273	0.905828	1500	4	-0.37981	0.95338	0.95335	1	20418	0	-0.37981
hsa-mir-184	4	0.021966	0.062764	0.905828	1501	2	-0.60195	0.86131	0.86144	1	18411	0	-0.60195
WDR37	6	0.02202	0.062911	0.907348	1502	3	-0.51366	0.38778	0.50273	1	10811	1	-0.51366
SORL1	6	0.022061	0.063004	0.907583	1503	4	-0.43424	0.11831	0.22886	1	4937	2	-0.43424
ITFG3	6	0.022064	0.063011	0.907583	1504	4	-0.34726	0.88241	0.88228	1	18860	0	-0.34726
ABLIM3	6	0.022085	0.063056	0.907631	1505	3	-0.45144	0.12127	0.23196	1	4995	1	-0.45144
hsa-mir-488	4	0.022131	0.06317	0.908038	1506	2	-0.39718	0.69428	0.70043	1	14995	0	-0.39718
GNL3	6	0.022147	0.06321	0.908038	1507	4	-0.83756	0.99722	0.99726	1	21508	0	-0.83756
hsa-mir-200b	4	0.022148	0.06321	0.908038	1508	2	-1.0157	0.75762	0.7577	1	16201	0	-1.0157
ADRA1A	6	0.022168	0.063267	0.908221	1509	2	-0.35463	0.77989	0.77987	1	16650	0	-0.35463
NEU2	6	0.022193	0.063337	0.908221	1510	4	-0.40072	0.99937	0.99935	1	21612	0	-0.40072
OTUD4	6	0.022197	0.063349	0.908221	1511	2	-0.51863	0.96969	0.96959	1	20767	0	-0.51863
PCDHGB2	2	0.022217	0.063402	0.90838	1512	1	-0.49181	0.71508	0.71846	1	15376	0	-0.49181
UTP20	6	0.022282	0.063579	0.908512	1513	3	-0.85033	0.94133	0.9413	1	20148	0	-0.85033
F2	6	0.022316	0.063659	0.908512	1514	1	0.36344	0.11237	0.22012	1	4764	3	0.36344
LRRC57	6	0.02234	0.063723	0.908512	1515	4	-0.89112	0.99779	0.9978	1	21529	0	-0.89112
CD19	6	0.022342	0.06373	0.908512	1516	4	-0.52346	0.99627	0.99633	1	21462	0	-0.52346
TMEM66	6	0.022362	0.063778	0.908512	1517	3	-0.3963	0.11635	0.22658	1	4895	1	-0.3963
AMN	6	0.022365	0.063786	0.908512	1518	2	-0.15351	0.70738	0.71172	1	15223	1	-0.15351
KRT75	6	0.022371	0.0638	0.908512	1519	2	-0.08306	0.88919	0.88906	1	18989	0	-0.08306
MEIS2	6	0.022376	0.063811	0.908512	1520	4	-0.36037	0.99555	0.99559	1	21443	0	-0.36037
CHCHD5	6	0.022414	0.063914	0.908512	1521	2	-0.038275	0.88948	0.88934	1	18995	0	-0.038275
hsa-mir-6830	4	0.022422	0.063936	0.908512	1522	2	-0.64983	0.98417	0.98413	1	21116	0	-0.64983
C8A	6	0.022423	0.063937	0.908512	1523	2	0.041985	0.92858	0.92848	1	19871	0	0.041985
C17orf51	6	0.022426	0.063944	0.908512	1524	3	-0.25243	0.46357	0.54335	1	11711	1	-0.25243
NCR1	6	0.022429	0.063956	0.908512	1525	4	-0.47726	0.919	0.91895	1	19649	0	-0.47726
DUSP26	6	0.022513	0.064164	0.908608	1528	3	-0.34207	0.051616	0.11718	0.975627	2600	1	-0.34207
GPX1	6	0.022525	0.064198	0.908608	1530	3	-0.40427	0.076708	0.16059	0.9865	3525	1	-0.40427
CCNH	6	0.022449	0.064008	0.908608	1526	2	-0.29432	0.1327	0.24398	1	5260	2	-0.29432
COMMD8	6	0.022464	0.064048	0.908608	1527	3	-0.29206	0.79426	0.79424	1	16961	0	-0.29206
UROD	6	0.022518	0.064177	0.908608	1529	2	-0.13342	0.95238	0.95238	1	20393	0	-0.13342
TBX19	6	0.022543	0.064235	0.908608	1531	3	-0.4413	0.9721	0.97203	1	20822	0	-0.4413
SGK223	6	0.022562	0.06428	0.908608	1532	1	-0.18776	0.66309	0.6753	1	14466	1	-0.18776
SOST	6	0.02257	0.064298	0.908608	1533	4	-0.42075	0.84004	0.84008	1	17936	0	-0.42075
hsa-mir-671	4	0.022606	0.064394	0.908824	1534	3	-1.0095	0.98493	0.98485	1	21135	0	-1.0095
SNX16	6	0.022612	0.064405	0.908824	1535	2	-0.0462	0.76477	0.7648	1	16341	0	-0.0462
MYH11	6	0.022658	0.064521	0.908824	1536	2	-0.4125	0.68569	0.69337	1	14842	1	-0.4125
RTN1	6	0.022661	0.064527	0.908824	1537	2	-0.0049966	0.64985	0.66503	1	14257	1	-0.0049966
SAR1B	6	0.022679	0.064572	0.908824	1538	3	-0.4427	0.96218	0.96215	1	20606	0	-0.4427
APOD	6	0.022686	0.064586	0.908824	1539	4	-0.57101	0.99574	0.99578	1	21448	0	-0.57101
RHBDD2	6	0.022692	0.064607	0.908824	1540	4	-0.34504	0.87959	0.87951	1	18778	0	-0.34504
BMPR1A	6	0.022809	0.064903	0.909291	1544	2	-0.26149	0.063899	0.13877	0.975881	3078	1	-0.26149
COPS4	6	0.022755	0.064774	0.909291	1541	4	-0.50357	0.99332	0.9933	1	21379	0	-0.50357
TMEM161B	6	0.022771	0.064813	0.909291	1542	2	0.022025	0.45883	0.54069	1	11651	1	0.022025
DMTN	6	0.022797	0.06487	0.909291	1543	3	-0.46129	0.85194	0.85208	1	18206	0	-0.46129
GGTLC2	6	0.022838	0.064988	0.909291	1545	3	-0.53426	0.72827	0.73021	1	15619	1	-0.53426
LRRC8E	6	0.022843	0.065001	0.909291	1546	4	-0.44756	0.99913	0.99912	1	21594	0	-0.44756
RTN4IP1	6	0.022852	0.065026	0.909291	1547	3	-0.18615	0.64358	0.66019	1	14159	1	-0.18615
ARID3A	6	0.022856	0.065036	0.909291	1548	3	-0.34641	0.2254	0.34108	1	7342	1	-0.34641
FFAR4	6	0.022858	0.065042	0.909291	1549	3	-0.33229	0.61279	0.63768	1	13686	1	-0.33229
EPS15L1	6	0.022865	0.06506	0.909291	1550	4	-0.74775	0.43251	0.52623	1	11327	1	-0.74775
PTPRN	6	0.022907	0.065174	0.909585	1552	2	0.50889	0.053246	0.12004	0.975627	2655	3	0.50889
GRM1	6	0.023104	0.065685	0.909585	1563	1	0.37032	0.096898	0.19456	0.997867	4217	3	0.37032
LYG1	6	0.022902	0.065161	0.909585	1551	3	-0.27766	0.89787	0.89776	1	19191	0	-0.27766
GFM1	6	0.022928	0.065232	0.909585	1553	4	-0.5358	0.91714	0.91711	1	19597	0	-0.5358
DNAAF1	6	0.022946	0.065276	0.909585	1554	3	-0.34083	0.96097	0.96097	1	20571	0	-0.34083
MPZ	6	0.022973	0.065341	0.909585	1555	4	-0.66405	0.95849	0.9585	1	20517	0	-0.66405
IL23A	6	0.022985	0.065374	0.909585	1556	4	-0.44706	0.71172	0.7155	1	15298	1	-0.44706
OR2T4	6	0.022992	0.065399	0.909585	1557	4	-0.48857	0.98298	0.98294	1	21079	0	-0.48857
GNG3	6	0.023006	0.065435	0.909585	1558	1	-0.085652	0.29884	0.41562	1	8942	2	-0.085652
hsa-mir-4263	4	0.023052	0.065548	0.909585	1559	2	-0.48888	0.37625	0.49552	1	10665	1	-0.48888
NUDCD3	6	0.023057	0.065561	0.909585	1560	3	-0.49009	0.88335	0.88321	1	18878	0	-0.49009
SLC43A2	6	0.023078	0.065617	0.909585	1561	2	-0.27843	0.84982	0.84997	1	18156	0	-0.27843
SLC4A5	6	0.023085	0.065635	0.909585	1562	3	-0.45518	0.83585	0.83596	1	17839	0	-0.45518
PNN	6	0.023113	0.065708	0.909585	1564	3	-0.37581	0.43276	0.52635	1	11333	1	-0.37581
KIAA0146	6	0.023122	0.065728	0.909585	1565	4	-0.30639	0.66923	0.68008	1	14571	1	-0.30639
SH3RF2	6	0.023131	0.065753	0.909585	1566	4	-0.66803	0.20193	0.31738	1	6827	1	-0.66803
hsa-mir-4666b	4	0.023181	0.065882	0.910787	1567	3	-0.62766	0.94013	0.94008	1	20121	0	-0.62766
RAB11A	6	0.023203	0.065933	0.910913	1568	1	-0.36145	0.9843	0.98425	1	21120	0	-0.36145
KIFC3	6	0.023301	0.06619	0.912709	1571	2	-0.011662	0.011223	0.034326	0.87963	844	2	-0.011662
HNRNPH1	6	0.023289	0.066161	0.912709	1569	2	0.4179	0.048914	0.11241	0.974908	2489	2	0.4179
DDX6	6	0.023291	0.066164	0.912709	1570	4	-0.48725	0.52401	0.57899	1	12462	1	-0.48725
DNAJB6	6	0.023342	0.066289	0.913014	1572	4	-0.8162	0.956	0.95596	1	20464	0	-0.8162
FASTKD5	6	0.02335	0.066308	0.913014	1573	3	-0.50197	0.82089	0.82094	1	17559	0	-0.50197
SMAD5	6	0.023361	0.066338	0.913014	1574	3	-0.53279	0.96704	0.967	1	20705	0	-0.53279
UBA5	6	0.023384	0.066399	0.91327	1575	4	-0.46908	0.98654	0.98651	1	21182	0	-0.46908
HIST2H2BE	6	0.023413	0.066465	0.913596	1576	2	-0.58814	0.41961	0.5193	1	11182	1	-0.58814
LECT2	6	0.023513	0.066716	0.915107	1579	3	-0.28971	0.040024	0.096518	0.970308	2148	1	-0.28971
SHBG	6	0.023741	0.06716	0.915107	1588	2	0.66068	0.10626	0.21008	0.998892	4548	3	0.66068
LCN9	6	0.023487	0.066657	0.915107	1577	4	-0.58194	0.21191	0.32745	1	7060	1	-0.58194
THEM4	6	0.023498	0.066688	0.915107	1578	2	-0.25758	0.42037	0.5197	1	11193	1	-0.25758
PLAC1	6	0.023565	0.066808	0.915107	1580	3	-0.30769	0.82614	0.82617	1	17663	0	-0.30769
KLHL4	6	0.023581	0.066839	0.915107	1581	2	-0.39762	0.4559	0.53907	1	11603	1	-0.39762
FAM83F	6	0.023599	0.066873	0.915107	1582	3	-0.38502	0.98613	0.98609	1	21168	0	-0.38502
CASR	6	0.023652	0.066984	0.915107	1583	2	0.18236	0.13805	0.24963	1	5381	2	0.18236
SDHAF2	6	0.023661	0.066999	0.915107	1584	3	-0.41523	0.73163	0.73327	1	15683	1	-0.41523
COLGALT2	6	0.023676	0.067032	0.915107	1585	3	-0.54126	0.83581	0.83593	1	17838	0	-0.54126
ZNF771	6	0.023685	0.067055	0.915107	1586	3	-0.4219	0.98943	0.98943	1	21248	0	-0.4219
MTG1	6	0.023695	0.06707	0.915107	1587	3	-0.24462	0.76515	0.76517	1	16350	0	-0.24462
SPOPL	6	0.023759	0.067193	0.915107	1589	3	-0.54327	0.10931	0.21511	1	4651	2	-0.54327
hsa-mir-517c	1	0.023761	0.067197	0.915107	1590	1	-1.1645	0.97624	0.97621	1	20920	0	-1.1645
C1orf85	6	0.023769	0.067208	0.915107	1591	3	-0.36016	0.98136	0.9813	1	21042	0	-0.36016
RFXANK	6	0.023821	0.067303	0.915513	1592	3	-0.38806	0.74512	0.74569	1	15947	1	-0.38806
EMC3	6	0.023843	0.067346	0.915513	1593	3	-0.30124	0.99284	0.99282	1	21362	0	-0.30124
TMED10	6	0.023866	0.06739	0.915513	1594	2	0.058135	0.90536	0.90523	1	19347	0	0.058135
SLCO1A2	6	0.023875	0.067407	0.915513	1595	2	-0.21035	0.83699	0.83706	1	17867	0	-0.21035
PRDM14	6	0.02398	0.067609	0.916819	1596	3	-0.2051	0.88245	0.88233	1	18863	0	-0.2051
hsa-mir-135b	4	0.023992	0.067628	0.916819	1597	2	-0.30723	0.61998	0.64286	1	13804	0	-0.30723
RAD9A	6	0.024027	0.067682	0.916819	1598	3	-1.0074	0.41734	0.51814	1	11158	1	-1.0074
LOC100287399	6	0.02404	0.0677	0.916819	1599	3	-0.12222	0.73883	0.73984	1	15828	1	-0.12222
ERCC2	6	0.024063	0.067745	0.916819	1600	2	-0.17178	0.98958	0.98958	1	21253	0	-0.17178
PYGO2	6	0.024074	0.067761	0.916819	1601	3	-0.052871	0.21851	0.33405	1	7203	2	-0.052871
FBLN7	6	0.024097	0.067806	0.916819	1602	3	-0.22299	0.37976	0.49867	1	10731	1	-0.22299
NUP205	6	0.024172	0.06794	0.916819	1603	3	-0.38981	0.65165	0.66638	1	14285	1	-0.38981
ZNF474	6	0.024177	0.067948	0.916819	1604	3	-0.38305	0.92034	0.92029	1	19670	0	-0.38305
POLG	6	0.024187	0.067965	0.916819	1605	3	-0.52365	0.99256	0.99254	1	21354	0	-0.52365
TXNRD2	6	0.02421	0.068008	0.916819	1606	3	-0.79469	0.92079	0.92073	1	19683	0	-0.79469
FIG4	6	0.024237	0.068064	0.916819	1607	1	0.12708	0.88639	0.88617	1	18936	0	0.12708
TFB1M	6	0.02426	0.068107	0.916819	1608	2	0.035526	0.23445	0.35029	1	7544	1	0.035526
hsa-mir-23b	4	0.024274	0.068133	0.916819	1609	3	-0.35764	0.88024	0.88016	1	18801	0	-0.35764
C17orf59	6	0.024286	0.068154	0.916819	1610	2	0.070507	0.13009	0.24116	1	5206	2	0.070507
hsa-mir-422a	4	0.0243	0.068181	0.916819	1611	2	-0.42811	0.95758	0.95757	1	20500	0	-0.42811
SRL	6	0.024357	0.068292	0.917376	1612	3	-0.49719	0.50397	0.5668	1	12233	1	-0.49719
TUBE1	6	0.024366	0.068307	0.917376	1613	3	-0.2273	0.52476	0.57944	1	12472	1	-0.2273
CHIC1	6	0.024404	0.068372	0.917613	1614	3	-0.34613	0.63153	0.6512	1	13978	1	-0.34613
PMP22	6	0.024422	0.068409	0.917613	1615	2	-0.37899	0.76058	0.76056	1	16257	1	-0.37899
BRCA1	6	0.024561	0.068674	0.920569	1616	3	-0.24155	0.64811	0.66371	1	14231	1	-0.24155
CSTF1	6	0.024581	0.068714	0.920569	1617	1	0.48755	0.35911	0.47766	1	10270	2	0.48755
hsa-mir-1225	4	0.024665	0.068884	0.922276	1618	3	-1.2857	0.97601	0.97596	1	20915	0	-1.2857
TSSK1B	6	0.024729	0.069003	0.922726	1619	1	-0.3272	0.92526	0.92518	1	19801	0	-0.3272
hsa-mir-500a	4	0.024729	0.069003	0.922726	1620	2	-0.37426	0.94935	0.94934	1	20327	0	-0.37426
PIR	6	0.024757	0.069056	0.922866	1621	3	-0.403	0.75057	0.75089	1	16057	1	-0.403
DNASE2	6	0.024813	0.069159	0.923492	1622	3	-0.52104	0.76498	0.765	1	16348	0	-0.52104
HS3ST5	6	0.024829	0.069188	0.923492	1623	2	-0.2388	0.81311	0.8131	1	17361	0	-0.2388
hsa-mir-8083	4	0.024862	0.069248	0.923695	1624	2	-0.59331	0.31465	0.43185	1	9290	1	-0.59331
F3	6	0.024885	0.069289	0.923695	1625	3	-0.72047	0.98061	0.9806	1	21016	0	-0.72047
ABCC6	6	0.024925	0.069366	0.923988	1626	3	-0.28076	0.9469	0.94691	1	20271	0	-0.28076
UNC13A	6	0.024952	0.06941	0.923988	1627	3	-0.39328	0.97579	0.97575	1	20908	0	-0.39328
DNAJC16	6	0.024967	0.069439	0.923988	1628	3	-0.29767	0.85491	0.85506	1	18275	0	-0.29767
GRINA	6	0.025122	0.069735	0.926031	1631	3	-0.098257	0.013162	0.039592	0.883159	969	1	-0.098257
CAPRIN2	6	0.025073	0.069648	0.926031	1629	3	-0.37669	0.61881	0.64199	1	13785	1	-0.37669
NonTargetingControlGuideForHuman_0362	1	0.025092	0.069685	0.926031	1630	1	-0.56985	0.97491	0.97486	1	20892	0	-0.56985
RELL1	6	0.025139	0.069763	0.926031	1632	2	0.016253	0.54942	0.59496	1	12805	1	0.016253
FMO3	6	0.025171	0.069833	0.926391	1633	2	-0.021395	0.43223	0.52609	1	11325	1	-0.021395
LPPR2	6	0.025221	0.069942	0.927232	1634	2	-0.049669	0.76542	0.76546	1	16358	0	-0.049669
ZNF658	6	0.025237	0.069982	0.927232	1635	3	-0.56128	0.70778	0.71206	1	15228	1	-0.56128
TMEM104	6	0.025266	0.070042	0.927402	1636	3	-0.32825	0.91145	0.91136	1	19475	0	-0.32825
C12orf40	6	0.025303	0.070115	0.927402	1637	2	-0.22167	0.73924	0.74021	1	15837	1	-0.22167
hsa-mir-4526	4	0.025305	0.070123	0.927402	1638	2	-0.46763	0.54329	0.59109	1	12718	1	-0.46763
DKK2	6	0.025329	0.070171	0.927414	1639	3	-0.57542	0.28646	0.40304	1	8653	1	-0.57542
GRAMD4	6	0.025368	0.070245	0.927414	1640	3	-0.15382	0.46015	0.5414	1	11665	1	-0.15382
RBBP6	6	0.025372	0.070253	0.927414	1641	3	-0.46641	0.98678	0.98674	1	21190	0	-0.46641
LILRB4	6	0.026007	0.071458	0.927654	1666	1	0.39302	0.0028845	0.010751	0.774985	296	2	0.39302
NAB2	6	0.025417	0.070335	0.927654	1642	2	-0.090388	0.64483	0.66117	1	14181	1	-0.090388
FITM2	6	0.025514	0.070523	0.927654	1643	2	0.0037329	0.4942	0.56102	1	12100	1	0.0037329
ALDH1A1	6	0.025564	0.070618	0.927654	1644	1	-0.0629	0.13067	0.24179	1	5218	2	-0.0629
hsa-mir-6505	4	0.025584	0.070655	0.927654	1645	1	0.082328	0.19528	0.3104	1	6672	1	0.082328
TSPAN15	6	0.025614	0.070712	0.927654	1646	1	-0.25286	0.7092	0.71329	1	15251	1	-0.25286
N4BP2L2	6	0.025661	0.070805	0.927654	1647	2	-0.17634	0.12806	0.23906	1	5151	1	-0.17634
PMM2	6	0.02567	0.070823	0.927654	1648	3	-0.58209	0.80641	0.80642	1	17229	0	-0.58209
TCL1B	6	0.025712	0.070899	0.927654	1649	3	-0.21013	0.84709	0.8472	1	18100	0	-0.21013
KLHL26	6	0.025713	0.0709	0.927654	1650	3	-0.56374	0.79156	0.79158	1	16909	0	-0.56374
DNAJC5	6	0.025723	0.070921	0.927654	1651	3	-0.48533	0.9705	0.97038	1	20782	0	-0.48533
AAED1	6	0.025791	0.07105	0.927654	1652	3	-0.61839	0.84811	0.84822	1	18122	0	-0.61839
CMPK2	6	0.025811	0.071086	0.927654	1653	3	-0.31108	0.90421	0.90409	1	19325	0	-0.31108
OR8K5	6	0.025818	0.071098	0.927654	1654	2	0.12183	0.15988	0.27284	1	5860	2	0.12183
NUDT15	6	0.025859	0.071171	0.927654	1655	1	-0.14283	0.71724	0.72039	1	15411	1	-0.14283
PET112	6	0.025873	0.071195	0.927654	1656	2	0.1325	0.33559	0.45328	1	9746	2	0.1325
LETM1	6	0.025883	0.071211	0.927654	1657	2	-0.51279	0.36851	0.4875	1	10480	1	-0.51279
ADH5	6	0.025901	0.071249	0.927654	1658	2	-0.32505	0.43392	0.52696	1	11345	1	-0.32505
ADPRHL2	6	0.025908	0.071263	0.927654	1659	1	0.086657	0.72145	0.72416	1	15490	1	0.086657
CSNK1E	6	0.025909	0.071264	0.927654	1660	3	-0.20684	0.92531	0.92523	1	19803	0	-0.20684
RNASEH2B	6	0.025923	0.071296	0.927654	1661	3	-0.087448	0.12563	0.23648	1	5099	2	-0.087448
ADSL	6	0.025975	0.071399	0.927654	1662	3	-0.42793	0.9338	0.9338	1	19989	0	-0.42793
KXD1	6	0.025984	0.071415	0.927654	1663	2	-0.058682	0.54709	0.59346	1	12771	1	-0.058682
MTF2	5	0.025989	0.071424	0.927654	1664	3	-0.42212	0.11443	0.22345	1	4837	1	-0.42212
OR13C8	6	0.026003	0.071449	0.927654	1665	3	-0.38752	0.7492	0.74959	1	16030	1	-0.38752
XPO6	6	0.026017	0.071474	0.927654	1667	3	-0.54335	0.9929	0.99287	1	21365	0	-0.54335
SCARF2	6	0.02604	0.071517	0.927654	1668	2	-0.19534	0.93476	0.93475	1	20017	0	-0.19534
POLR2M	6	0.026049	0.071538	0.927654	1669	3	-0.36793	0.73148	0.73313	1	15679	1	-0.36793
hsa-mir-585	4	0.026071	0.071581	0.927654	1670	3	-0.67416	0.81181	0.81176	1	17337	0	-0.67416
hsa-mir-4761	4	0.026078	0.071591	0.927654	1671	3	-0.88324	0.87308	0.87314	1	18639	0	-0.88324
RBAK-LOC389458	2	0.026103	0.071637	0.927654	1672	2	-1.5591	0.9739	0.97385	1	20865	0	-1.5591
CERKL	6	0.026105	0.071641	0.927654	1673	2	0.079494	0.72526	0.72757	1	15568	1	0.079494
UMOD	6	0.026165	0.071769	0.928756	1674	3	-0.44194	0.84503	0.84512	1	18058	0	-0.44194
ZNF259	6	0.026203	0.071844	0.929165	1675	3	-0.78402	0.13842	0.25003	1	5393	2	-0.78402
IQGAP3	6	0.026252	0.071933	0.929769	1676	3	-0.61469	0.99746	0.9975	1	21517	0	-0.61469
SLC17A7	6	0.026281	0.071992	0.929829	1677	2	0.51215	0.020642	0.059454	0.923377	1394	4	0.51215
SRSF9	6	0.026298	0.072024	0.929829	1678	3	-0.48725	0.24829	0.36427	1	7857	1	-0.48725
KATNBL1	6	0.026328	0.072075	0.929895	1679	2	-0.1452	0.95328	0.95325	1	20413	0	-0.1452
hsa-mir-6511b-1	3	0.02637	0.072154	0.929895	1680	2	-0.57064	0.86306	0.86317	1	18441	0	-0.57064
TMSB4X	4	0.026371	0.072158	0.929895	1681	1	-0.13398	0.5077	0.56908	1	12274	1	-0.13398
HAUS8	6	0.026421	0.072261	0.930667	1682	3	-0.68115	0.41983	0.51942	1	11187	1	-0.68115
ARRDC5	6	0.026731	0.072877	0.93286	1692	3	-0.38497	0.049066	0.11267	0.974908	2495	2	-0.38497
FUT9	6	0.026744	0.072905	0.93286	1693	2	0.039997	0.052912	0.11947	0.975627	2642	2	0.039997
NDUFV3	6	0.026551	0.072527	0.93286	1683	3	-0.53904	0.88751	0.88737	1	18963	0	-0.53904
hsa-mir-4779	4	0.026572	0.072573	0.93286	1684	3	-1.2261	0.99122	0.9912	1	21307	0	-1.2261
ZNF652	6	0.026596	0.072623	0.93286	1685	3	-0.20164	0.76547	0.76551	1	16360	0	-0.20164
CHKA	6	0.026661	0.072738	0.93286	1686	3	-1.1397	0.77367	0.77361	1	16516	0	-1.1397
COMMD3-BMI1	2	0.026679	0.07277	0.93286	1687	2	-0.75738	0.97332	0.97326	1	20852	0	-0.75738
KLK11	6	0.026686	0.072781	0.93286	1688	3	-0.74517	0.24755	0.36351	1	7843	2	-0.74517
KRTAP3-2	6	0.026694	0.072803	0.93286	1689	1	0.070489	0.49749	0.56298	1	12150	1	0.070489
FAIM2	6	0.026701	0.072819	0.93286	1690	3	-0.4121	0.8496	0.84973	1	18150	0	-0.4121
GOLM1	6	0.02673	0.072876	0.93286	1691	3	-0.40083	0.16481	0.27802	1	5968	1	-0.40083
KCTD12	6	0.026793	0.072994	0.933449	1694	1	0.0050425	0.026154	0.070695	0.950044	1612	2	0.0050425
GUK1	6	0.026851	0.073109	0.934376	1695	3	-0.47322	0.43563	0.52792	1	11371	1	-0.47322
STX1B	6	0.026908	0.073219	0.93453	1696	3	-0.57061	0.99682	0.99685	1	21485	0	-0.57061
SSR3	6	0.02694	0.073273	0.93453	1697	3	-0.4235	0.8567	0.85682	1	18316	0	-0.4235
OR2F1	6	0.026941	0.073275	0.93453	1698	3	-0.43082	0.98571	0.98566	1	21157	0	-0.43082
PRAMEF15	5	0.026953	0.073299	0.93453	1699	3	-0.38128	0.97386	0.97382	1	20864	0	-0.38128
CT62	6	0.027017	0.073422	0.93453	1700	3	-0.3185	0.84485	0.84494	1	18050	0	-0.3185
MLLT6	6	0.027021	0.073426	0.93453	1701	2	0.13025	0.23207	0.3479	1	7488	1	0.13025
hsa-mir-199a-1	4	0.027065	0.073509	0.93453	1702	2	-0.883	0.46434	0.5438	1	11721	1	-0.883
PMVK	6	0.027067	0.07351	0.93453	1703	3	-0.49078	0.88716	0.88702	1	18952	0	-0.49078
ELL	6	0.027077	0.073536	0.93453	1704	2	-0.054441	0.64382	0.66037	1	14165	1	-0.054441
PCDHA10	2	0.027128	0.073626	0.93453	1705	2	-0.94938	0.95949	0.9595	1	20536	0	-0.94938
BRAT1	6	0.027133	0.073632	0.93453	1706	3	-0.55044	0.28376	0.40033	1	8599	1	-0.55044
ALDOA	6	0.027136	0.073639	0.93453	1707	3	-0.48698	0.98391	0.98388	1	21106	0	-0.48698
SLC2A7	6	0.027185	0.073729	0.935117	1708	1	0.18375	0.013988	0.04181	0.893664	1013	2	0.18375
SOX10	6	0.027234	0.073815	0.935117	1709	3	-0.53592	0.13445	0.24582	1	5299	1	-0.53592
LOH12CR1	6	0.027234	0.073816	0.935117	1710	3	-0.34888	0.99409	0.99409	1	21395	0	-0.34888
NIPAL4	6	0.027257	0.073858	0.935117	1711	2	-0.01569	0.791	0.79103	1	16894	0	-0.01569
FAM196B	6	0.027284	0.073911	0.935236	1712	2	-0.12323	0.81609	0.81604	1	17438	0	-0.12323
SMAD4	6	0.027313	0.073962	0.935337	1713	2	-0.11731	0.98971	0.98971	1	21257	0	-0.11731
FOSL1	6	0.027391	0.074105	0.9366	1714	3	-0.27529	0.061681	0.1349	0.975627	2984	2	-0.27529
AGAP4	6	0.027446	0.074209	0.937364	1715	2	-0.40451	0.5399	0.58893	1	12666	1	-0.40451
GSC2	6	0.02748	0.074269	0.937558	1716	2	-0.085858	0.87323	0.87329	1	18642	0	-0.085858
ZNF500	6	0.027503	0.07431	0.937558	1717	2	-0.17607	0.99076	0.99076	1	21294	0	-0.17607
ZSCAN32	6	0.02755	0.074402	0.937717	1718	3	-0.13966	0.465	0.54416	1	11730	1	-0.13966
DCUN1D3	6	0.027553	0.07441	0.937717	1719	3	-0.21262	0.81859	0.81859	1	17511	0	-0.21262
ZKSCAN5	6	0.027578	0.074456	0.937753	1720	1	-0.15736	0.74536	0.7459	1	15952	1	-0.15736
TESPA1	6	0.027627	0.074549	0.938388	1721	2	-0.10094	0.53038	0.5829	1	12542	1	-0.10094
ZNF605	6	0.027676	0.074634	0.938907	1722	3	-0.35131	0.76432	0.76435	1	16334	0	-0.35131
hsa-mir-4764	4	0.027735	0.074747	0.939787	1723	2	-0.55026	0.35289	0.47126	1	10126	1	-0.55026
CFHR2	6	0.027872	0.075007	0.942509	1724	3	-0.26201	0.3546	0.473	1	10158	2	-0.26201
KRT79	6	0.027921	0.075093	0.943036	1725	1	0.32898	0.16313	0.27624	1	5931	2	0.32898
T	6	0.028056	0.075345	0.943482	1729	2	0.23291	0.025614	0.069675	0.947969	1587	1	0.23291
SAMD10	6	0.02802	0.075281	0.943482	1728	2	0.13058	0.085282	0.17506	0.993072	3813	2	0.13058
hsa-mir-381	4	0.028101	0.075443	0.943482	1732	2	-0.8701	0.089496	0.1822	0.995323	3951	1	-0.8701
RFTN1	6	0.02797	0.075188	0.943482	1726	1	0.41962	0.21343	0.32895	1	7092	1	0.41962
FBXO38	6	0.027998	0.075243	0.943482	1727	2	-0.31584	0.67768	0.68682	1	14702	1	-0.31584
GLDC	6	0.028069	0.075368	0.943482	1730	2	-0.19005	0.67098	0.68146	1	14596	1	-0.19005
DMXL2	6	0.028094	0.075421	0.943482	1731	2	-0.312	0.26067	0.37682	1	8108	2	-0.312
CCDC91	6	0.028118	0.075477	0.943482	1733	2	0.0030475	0.23603	0.35187	1	7580	2	0.0030475
TPSAB1	6	0.028161	0.075565	0.943496	1735	2	0.48739	0.057029	0.12668	0.975627	2797	3	0.48739
SIGLEC10	5	0.028159	0.075562	0.943496	1734	1	0.14839	0.81539	0.81534	1	17417	0	0.14839
C7orf55-LUC7L2	5	0.028196	0.075637	0.943848	1736	3	-0.4474	0.71187	0.71563	1	15303	0	-0.4474
ARL14EPL	6	0.028224	0.075692	0.943945	1737	3	-0.38378	0.56801	0.60688	1	13051	1	-0.38378
hsa-mir-5188	4	0.028257	0.075755	0.943945	1738	2	-0.27294	0.61452	0.63891	1	13711	1	-0.27294
HNRNPL	6	0.028266	0.075775	0.943945	1739	3	-0.69301	0.98695	0.98691	1	21197	0	-0.69301
HARS	6	0.028382	0.076004	0.945777	1740	3	-0.48701	0.3194	0.43671	1	9400	1	-0.48701
OR56B1	6	0.028412	0.076055	0.945777	1741	1	0.33703	0.20359	0.31909	1	6862	2	0.33703
SLC35D3	6	0.028416	0.076063	0.945777	1742	3	-0.3873	0.83089	0.83089	1	17737	0	-0.3873
ZNF830	6	0.028431	0.076097	0.945777	1743	3	-0.17211	0.24477	0.36074	1	7779	2	-0.17211
ZNF431	6	0.028459	0.07615	0.945894	1744	2	-0.06456	0.25982	0.37596	1	8096	2	-0.06456
DNAJC5G	6	0.028507	0.076239	0.946458	1745	2	0.065477	0.19993	0.31528	1	6777	1	0.065477
CYR61	6	0.028559	0.076347	0.94726	1746	2	-0.1941	0.74303	0.74375	1	15902	1	-0.1941
CHST13	6	0.028681	0.076585	0.949207	1747	2	-0.010629	0.25769	0.37379	1	8040	2	-0.010629
hsa-mir-378i	4	0.028695	0.076616	0.949207	1748	3	-0.39295	0.95491	0.95492	1	20446	0	-0.39295
FAM195A	6	0.028706	0.076636	0.949207	1749	3	-0.50021	0.80408	0.80408	1	17174	0	-0.50021
THAP8	6	0.028879	0.076964	0.950887	1752	3	-0.22948	0.067302	0.14459	0.977605	3203	2	-0.22948
GTF2E2	6	0.028827	0.076862	0.950887	1750	3	-0.43429	0.68456	0.69245	1	14817	1	-0.43429
C19orf44	6	0.028874	0.076955	0.950887	1751	3	-0.29246	0.892	0.89186	1	19050	0	-0.29246
ZCCHC13	6	0.028902	0.077018	0.950887	1753	2	-0.07635	0.47954	0.55252	1	11934	1	-0.07635
BSG	6	0.028921	0.077059	0.950887	1754	3	-0.41641	0.98544	0.98539	1	21149	0	-0.41641
hsa-mir-662	4	0.028931	0.077074	0.950887	1755	3	-0.47964	0.83479	0.83489	1	17814	0	-0.47964
C1D	6	0.028951	0.077121	0.950887	1756	1	0.33946	0.10905	0.21469	1	4639	2	0.33946
SHISA9	6	0.028952	0.077123	0.950887	1757	2	0.045069	0.3009	0.41775	1	8995	2	0.045069
AGXT2	6	0.029156	0.077501	0.951289	1764	2	0.22746	0.045864	0.107	0.974908	2377	2	0.22746
APBA1	6	0.029078	0.077351	0.951289	1760	2	0.29556	0.091995	0.18629	0.995323	4047	3	0.29556
MOCS3	6	0.029	0.077213	0.951289	1758	2	-0.083511	0.9212	0.92113	1	19697	0	-0.083511
HSP90B1	6	0.029058	0.077316	0.951289	1759	2	-0.13011	0.48543	0.55599	1	11989	1	-0.13011
NOV	6	0.029098	0.077393	0.951289	1761	1	0.10651	0.36942	0.48843	1	10498	2	0.10651
DMPK	6	0.029104	0.077404	0.951289	1762	3	-0.45126	0.67401	0.68392	1	14650	1	-0.45126
ANK3	6	0.029147	0.077484	0.951289	1763	2	0.041199	0.56325	0.60382	1	12995	1	0.041199
hsa-mir-1257	4	0.029158	0.077507	0.951289	1765	2	-0.2093	0.75437	0.75458	1	16133	0	-0.2093
CACNA1S	6	0.029196	0.077585	0.951714	1766	1	0.064322	0.044381	0.10436	0.973339	2321	2	0.064322
ARMC9	6	0.029833	0.078749	0.954137	1786	1	0.039619	0.024876	0.068236	0.945855	1562	1	0.039619
POLR2B	6	0.029867	0.078806	0.954137	1789	3	-0.26956	0.036729	0.090532	0.963932	2033	2	-0.26956
hsa-mir-922	4	0.029322	0.07784	0.954137	1767	2	-0.21956	0.3605	0.47915	1	10306	1	-0.21956
LDHA	6	0.029341	0.07788	0.954137	1768	3	-0.56033	0.61231	0.63733	1	13681	1	-0.56033
ADAMTS18	6	0.029389	0.07796	0.954137	1769	3	-0.28495	0.2177	0.33322	1	7185	2	-0.28495
PLVAP	6	0.029521	0.078193	0.954137	1770	3	-0.25031	0.99322	0.99319	1	21374	0	-0.25031
USP11	6	0.029539	0.07822	0.954137	1771	3	-0.12214	0.91123	0.91112	1	19471	0	-0.12214
C11orf45	6	0.029595	0.078312	0.954137	1772	2	-0.080767	0.50754	0.56897	1	12272	1	-0.080767
UBA6	6	0.029617	0.078355	0.954137	1773	3	-0.4711	0.36267	0.48139	1	10354	1	-0.4711
HERPUD2	6	0.029637	0.078388	0.954137	1774	2	0.090481	0.86677	0.86686	1	18509	0	0.090481
NR4A1	6	0.029675	0.078458	0.954137	1775	3	-0.29486	0.32129	0.43865	1	9432	2	-0.29486
C12orf4	6	0.029686	0.07848	0.954137	1776	2	-0.10977	0.76757	0.76764	1	16404	0	-0.10977
OPALIN	6	0.029707	0.07852	0.954137	1777	3	-0.44862	0.10994	0.2162	1	4671	2	-0.44862
WBP11	6	0.029722	0.07855	0.954137	1778	3	-0.65187	0.98685	0.98682	1	21193	0	-0.65187
C11orf54	6	0.029728	0.078561	0.954137	1779	3	-0.38744	0.31038	0.42743	1	9203	1	-0.38744
STK31	6	0.029755	0.078609	0.954137	1780	3	-0.5305	0.55385	0.59783	1	12870	1	-0.5305
PHOX2A	6	0.029784	0.078659	0.954137	1781	1	0.036301	0.19962	0.31495	1	6771	2	0.036301
SMARCA5	6	0.029791	0.078672	0.954137	1782	3	-0.46588	0.83769	0.83776	1	17881	0	-0.46588
PDE5A	6	0.029803	0.078696	0.954137	1783	3	-0.48181	0.2666	0.38279	1	8222	1	-0.48181
MUC12	6	0.029811	0.078705	0.954137	1784	3	-0.41462	0.62559	0.64685	1	13890	1	-0.41462
hsa-mir-7703	4	0.029813	0.07871	0.954137	1785	2	-0.41501	0.76324	0.76323	1	16313	0	-0.41501
PIAS3	6	0.029856	0.078789	0.954137	1787	3	-0.42863	0.35956	0.47814	1	10276	2	-0.42863
WDR83	6	0.02986	0.078794	0.954137	1788	2	0.075118	0.59701	0.62655	1	13470	1	0.075118
CASS4	6	0.029883	0.07884	0.954137	1790	3	-0.27828	0.89628	0.89616	1	19154	0	-0.27828
hsa-mir-770	4	0.029911	0.078893	0.954251	1791	1	0.035186	0.20896	0.32446	1	6993	1	0.035186
NTPCR	6	0.029938	0.078951	0.954421	1792	3	-0.39644	0.95439	0.95438	1	20438	0	-0.39644
CIAPIN1	6	0.030076	0.07921	0.956856	1793	2	0.14763	0.0036859	0.013106	0.802833	353	2	0.14763
MVP	6	0.030096	0.079241	0.956856	1794	3	-0.44955	0.21855	0.3341	1	7204	1	-0.44955
ZNF587B	6	0.030127	0.079301	0.957051	1795	2	0.22595	0.36686	0.48579	1	10447	2	0.22595
CSK	6	0.030176	0.079394	0.957518	1796	1	-0.31901	0.79627	0.79625	1	16999	0	-0.31901
C9orf66	6	0.030215	0.079461	0.957518	1797	2	0.39048	0.57905	0.61423	1	13216	1	0.39048
HLA-DQB1	6	0.030274	0.079577	0.957518	1798	1	0.26442	0.36277	0.4815	1	10357	1	0.26442
NonTargetingControlGuideForHuman_0600	1	0.030282	0.079587	0.957518	1799	1	-1.2405	0.96972	0.96961	1	20768	0	-1.2405
TXNDC17	6	0.030284	0.07959	0.957518	1800	3	-0.31306	0.97302	0.97295	1	20840	0	-0.31306
COX6B1	6	0.030294	0.079605	0.957518	1801	2	-0.092206	0.78769	0.78769	1	16822	0	-0.092206
MRPL1	6	0.030323	0.079655	0.95758	1802	2	-0.37741	0.61761	0.64112	1	13763	1	-0.37741
TECTB	6	0.030372	0.079749	0.957791	1803	1	0.29425	0.13339	0.2447	1	5273	2	0.29425
UFL1	6	0.030408	0.079821	0.957791	1804	3	-0.58195	0.71822	0.72126	1	15429	1	-0.58195
FCRL1	6	0.03042	0.079841	0.957791	1805	1	-0.027777	0.15128	0.26375	1	5680	1	-0.027777
SPOP	6	0.030462	0.079915	0.957791	1806	3	-0.5481	0.38658	0.50213	1	10801	1	-0.5481
hsa-mir-22	4	0.0305	0.079992	0.957791	1807	2	-0.17264	0.10977	0.21589	1	4665	1	-0.17264
AARS2	6	0.030505	0.080004	0.957791	1808	3	-0.37085	0.96448	0.96446	1	20648	0	-0.37085
hsa-mir-4267	4	0.030508	0.080009	0.957791	1809	2	-0.43938	0.92553	0.92547	1	19805	0	-0.43938
GTF2F1	6	0.030518	0.080031	0.957791	1810	1	-0.033541	0.12866	0.2397	1	5163	2	-0.033541
hsa-mir-3682	4	0.030538	0.08007	0.957791	1811	3	-0.59903	0.86886	0.86891	1	18555	0	-0.59903
RCAN3	6	0.030567	0.080122	0.95788	1812	2	0.29327	0.15052	0.26293	1	5664	2	0.29327
NDUFAB1	6	0.030616	0.080215	0.958466	1813	2	-0.24252	0.23461	0.35045	1	7548	1	-0.24252
GATA1	6	0.030665	0.080311	0.959024	1814	2	-0.25806	0.92409	0.92403	1	19763	0	-0.25806
hsa-mir-185	4	0.030686	0.08035	0.959024	1815	3	-0.48302	0.99642	0.99646	1	21466	0	-0.48302
HTATSF1	6	0.030763	0.080489	0.959892	1816	3	-0.47827	0.99268	0.99266	1	21356	0	-0.47827
FAM26F	6	0.030776	0.080512	0.959892	1817	3	-0.62621	0.23304	0.3489	1	7513	2	-0.62621
CLUAP1	6	0.030841	0.08063	0.960731	1818	3	-0.57124	0.98505	0.985	1	21139	0	-0.57124
FDXR	6	0.030861	0.080671	0.960731	1819	3	-0.15315	0.85577	0.85591	1	18294	0	-0.15315
SRP68	6	0.030939	0.080816	0.961927	1820	3	-0.18101	0.8204	0.82043	1	17545	0	-0.18101
RIMBP3	6	0.031008	0.080946	0.961965	1821	1	0.21264	0.0532	0.11998	0.975627	2654	2	0.21264
hsa-mir-4674	4	0.031026	0.080981	0.961965	1822	2	-0.53152	0.45412	0.53804	1	11584	1	-0.53152
KCND1	6	0.031049	0.081024	0.961965	1823	2	-0.2475	0.62934	0.64958	1	13944	1	-0.2475
KLHL34	6	0.031079	0.081082	0.961965	1824	2	-0.060824	0.74061	0.74149	1	15862	1	-0.060824
hsa-mir-6777	4	0.031089	0.081105	0.961965	1825	1	-0.072801	0.8054	0.8054	1	17205	0	-0.072801
SCARA5	6	0.031099	0.081122	0.961965	1826	3	-0.31117	0.83608	0.83618	1	17846	0	-0.31117
hsa-mir-128-2	4	0.031104	0.08113	0.961965	1827	2	-0.58118	0.64282	0.65961	1	14151	0	-0.58118
UBXN1	6	0.031168	0.08125	0.962863	1828	3	-0.34198	0.30632	0.42325	1	9114	1	-0.34198
LIN7B	6	0.031245	0.081392	0.963591	1829	3	-0.40391	0.023301	0.065223	0.936419	1508	2	-0.40391
DOLK	6	0.031252	0.0814	0.963591	1830	2	-0.30114	0.91566	0.91559	1	19559	0	-0.30114
hsa-mir-4311	4	0.031422	0.081718	0.964677	1834	3	-0.55332	0.057914	0.12823	0.975627	2828	1	-0.55332
ATF6B	6	0.031497	0.081854	0.964677	1837	1	0.39049	0.083536	0.17204	0.993072	3743	3	0.39049
FRA10AC1	5	0.031391	0.081666	0.964677	1831	3	-0.87684	0.29788	0.41463	1	8925	1	-0.87684
NonTargetingControlGuideForHuman_0492	1	0.031395	0.081673	0.964677	1832	1	-0.44071	0.9686	0.96855	1	20746	0	-0.44071
GATA4	6	0.031415	0.081706	0.964677	1833	3	-0.19421	0.20459	0.32009	1	6888	1	-0.19421
XKR4	6	0.031448	0.081761	0.964677	1835	1	0.10284	0.33367	0.4513	1	9701	1	0.10284
CLEC16A	6	0.031453	0.081769	0.964677	1836	3	-0.49981	0.49106	0.55922	1	12061	1	-0.49981
GDPD2	6	0.031508	0.081868	0.964677	1838	3	-0.28339	0.73662	0.73778	1	15785	1	-0.28339
hsa-mir-6862-1	4	0.031547	0.081928	0.964677	1839	1	-0.34391	0.6327	0.65205	1	14004	0	-0.34391
MYLK4	6	0.031551	0.081937	0.964677	1840	2	-0.23482	0.3341	0.45175	1	9711	1	-0.23482
SMC6	6	0.031641	0.082105	0.965027	1842	2	0.060432	0.073602	0.15531	0.985762	3407	1	0.060432
C12orf42	6	0.031611	0.082045	0.965027	1841	2	-0.043178	0.2643	0.38046	1	8179	1	-0.043178
hsa-mir-8082	4	0.031645	0.082109	0.965027	1843	2	-0.98478	0.90031	0.90022	1	19250	0	-0.98478
PCDHGB3	2	0.031664	0.082145	0.965027	1844	1	-0.80941	0.15114	0.26361	1	5675	1	-0.80941
FAM160B1	6	0.031741	0.082285	0.965429	1845	1	0.10769	0.0214	0.061407	0.926187	1435	2	0.10769
MAB21L2	6	0.031752	0.082306	0.965429	1846	2	0.20051	0.074209	0.15631	0.986296	3431	2	0.20051
C17orf82	6	0.031773	0.082345	0.965429	1847	2	0.15186	0.75513	0.7553	1	16145	1	0.15186
C1orf74	6	0.03179	0.082381	0.965429	1848	3	-0.15533	0.90636	0.90622	1	19375	0	-0.15533
LRIG1	6	0.031813	0.082429	0.965429	1849	2	-0.35419	0.96909	0.96902	1	20759	0	-0.35419
SMAD3	6	0.031823	0.082447	0.965429	1850	3	-0.34232	0.93272	0.93271	1	19969	0	-0.34232
CYB561D1	6	0.031884	0.082568	0.966023	1851	2	0.19653	0.16964	0.28313	1	6061	1	0.19653
hsa-mir-3666	4	0.031896	0.082587	0.966023	1852	3	-0.52083	0.60078	0.62916	1	13525	1	-0.52083
PBX4	6	0.031944	0.082684	0.966134	1853	3	-0.37063	0.057463	0.12745	0.975627	2814	2	-0.37063
TOM1L2	6	0.031945	0.082685	0.966134	1854	3	-0.42977	0.9495	0.94948	1	20330	0	-0.42977
ISG20L2	6	0.031986	0.082775	0.966665	1855	2	0.90767	0.0096002	0.02989	0.87963	735	4	0.90767
CCDC30	6	0.032132	0.083054	0.967691	1857	1	-0.02956	0.040752	0.097863	0.971279	2182	2	-0.02956
CENPI	6	0.032084	0.082963	0.967691	1856	2	0.094425	0.2767	0.39316	1	8437	1	0.094425
ACVR1	6	0.032181	0.083153	0.967691	1858	2	-0.22179	0.97774	0.97769	1	20954	0	-0.22179
hsa-mir-4729	4	0.0322	0.083178	0.967691	1859	1	0.23827	0.59651	0.62619	1	13459	1	0.23827
PGA3	6	0.032234	0.083245	0.967691	1860	3	-0.29767	0.96538	0.96535	1	20671	0	-0.29767
MOCOS	6	0.032256	0.083289	0.967691	1861	3	-0.31876	0.94533	0.94534	1	20239	0	-0.31876
FMNL3	6	0.032279	0.083332	0.967691	1862	1	0.060805	0.944	0.94397	1	20207	0	0.060805
IBTK	6	0.03229	0.08335	0.967691	1863	3	-0.43855	0.84568	0.84578	1	18072	0	-0.43855
AFF3	6	0.032309	0.083396	0.967691	1864	2	-0.14945	0.36257	0.48128	1	10351	1	-0.14945
IER2	6	0.03234	0.083457	0.967691	1865	3	-0.54502	0.32644	0.44397	1	9542	2	-0.54502
MFN2	6	0.03235	0.083476	0.967691	1866	3	-0.62252	0.54323	0.59105	1	12715	1	-0.62252
TMEM72	6	0.032381	0.083528	0.967691	1867	2	-0.13103	0.21261	0.32816	1	7076	1	-0.13103
C17orf49	6	0.032401	0.083562	0.967691	1868	3	-0.31591	0.87098	0.87105	1	18604	0	-0.31591
NonTargetingControlGuideForHuman_0042	1	0.032408	0.083573	0.967691	1869	1	-1.1573	0.96759	0.96757	1	20722	0	-1.1573
CTNNBL1	6	0.032411	0.083577	0.967691	1870	3	-0.52737	0.93248	0.93246	1	19965	0	-0.52737
NUDT19	6	0.032413	0.083578	0.967691	1871	3	-0.36661	0.23594	0.35178	1	7579	1	-0.36661
FAM193A	6	0.032502	0.083765	0.969342	1872	3	-0.62086	0.35845	0.47697	1	10258	1	-0.62086
MTRNR2L3	4	0.032556	0.083865	0.969877	1873	2	-0.68419	0.96485	0.96485	1	20654	0	-0.68419
RIMS3	6	0.032575	0.083901	0.969877	1874	3	-0.43251	0.17893	0.29303	1	6288	2	-0.43251
BRIP1	6	0.032635	0.084013	0.970648	1875	2	0.16332	0.3576	0.47611	1	10238	2	0.16332
OSTF1	6	0.032699	0.084141	0.971614	1876	3	-0.50517	0.29575	0.41246	1	8874	2	-0.50517
LUM	6	0.032817	0.084382	0.973383	1877	1	-0.045129	0.25616	0.37219	1	8011	2	-0.045129
SYT1	6	0.03284	0.084431	0.973383	1878	2	-0.32048	0.73682	0.73796	1	15790	1	-0.32048
SUV420H2	6	0.032856	0.084462	0.973383	1879	3	-0.48259	0.77159	0.7716	1	16472	0	-0.48259
EIF3A	6	0.032865	0.084476	0.973383	1880	1	0.34252	0.14477	0.25678	1	5534	1	0.34252
SPATA31A2	3	0.032889	0.084532	0.973383	1881	2	-0.52661	0.24429	0.36025	1	7765	1	-0.52661
SDK2	6	0.032907	0.084564	0.973383	1882	3	-0.63079	0.91561	0.91555	1	19557	0	-0.63079
C16orf71	6	0.033055	0.084857	0.975723	1884	2	0.011082	0.08238	0.17009	0.993072	3703	1	0.011082
GOLPH3L	6	0.033048	0.084844	0.975723	1883	3	-0.4382	0.63627	0.65472	1	14050	1	-0.4382
hsa-mir-3188	4	0.03309	0.084921	0.975941	1885	3	-0.53676	0.86923	0.86928	1	18566	0	-0.53676
hsa-mir-548az	4	0.033143	0.085018	0.976531	1886	2	-0.71884	0.63499	0.65375	1	14030	0	-0.71884
TDRD10	6	0.033256	0.085242	0.97694	1887	2	-0.1076	0.96032	0.96034	1	20556	0	-0.1076
RILP	6	0.033261	0.085251	0.97694	1888	2	0.072962	0.16805	0.28138	1	6033	1	0.072962
PPP2R5E	6	0.033281	0.085289	0.97694	1889	2	0.16594	0.11653	0.22688	1	4902	2	0.16594
TBC1D22A	6	0.033305	0.085329	0.97694	1890	1	0.34399	0.35446	0.47285	1	10156	2	0.34399
hsa-mir-4306	4	0.033308	0.085333	0.97694	1891	3	-0.40325	0.97199	0.97192	1	20819	0	-0.40325
KLHL31	6	0.033312	0.085336	0.97694	1892	2	0.33242	0.3254	0.44287	1	9521	2	0.33242
hsa-mir-7107	4	0.033343	0.085392	0.97694	1893	2	-1.0977	0.28656	0.40314	1	8654	1	-1.0977
RPTN	6	0.033366	0.085438	0.97694	1894	3	-0.43088	0.8832	0.88306	1	18876	0	-0.43088
STX19	6	0.033394	0.085493	0.97694	1895	3	-0.47208	0.91013	0.91004	1	19448	0	-0.47208
NDEL1	6	0.033415	0.08552	0.97694	1896	3	-0.2268	0.32342	0.44083	1	9473	2	-0.2268
ISG20	6	0.033434	0.085561	0.97694	1897	3	-0.39157	0.88461	0.88442	1	18900	0	-0.39157
CNPY2	6	0.033451	0.085594	0.97694	1898	2	0.12305	0.42438	0.52188	1	11235	1	0.12305
CNNM4	6	0.033628	0.085912	0.976994	1904	3	0.17663	0.010416	0.032096	0.87963	778	3	0.17663
hsa-mir-5692a-1	4	0.033506	0.085692	0.976994	1900	1	0.52959	0.03076	0.079486	0.955945	1796	2	0.52959
MOV10	6	0.0335	0.085679	0.976994	1899	1	-0.33432	0.29126	0.40791	1	8765	1	-0.33432
DRAM1	6	0.033549	0.08578	0.976994	1901	2	-0.21977	0.56851	0.60722	1	13060	1	-0.21977
CCR4	6	0.03356	0.0858	0.976994	1902	3	-0.38783	0.75052	0.75084	1	16055	1	-0.38783
CEACAM7	6	0.033611	0.085887	0.976994	1903	2	0.081135	0.75675	0.75686	1	16179	1	0.081135
NonTargetingControlGuideForHuman_0826	1	0.03363	0.085915	0.976994	1905	1	-0.49926	0.96637	0.96631	1	20688	0	-0.49926
HAUS7	6	0.033684	0.086032	0.977816	1906	3	-0.6813	0.096501	0.19389	0.997867	4205	1	-0.6813
TMC7	6	0.033714	0.086083	0.977875	1907	3	-0.38869	0.29667	0.4134	1	8897	2	-0.38869
CCNB2	6	0.033744	0.086146	0.978083	1908	1	-0.1903	0.75843	0.75849	1	16219	1	-0.1903
THG1L	6	0.033793	0.086241	0.978215	1909	3	-0.35741	0.28964	0.40628	1	8728	1	-0.35741
ALLC	6	0.033798	0.086248	0.978215	1910	2	-0.27201	0.93071	0.93064	1	19917	0	-0.27201
TCAIM	6	0.03386	0.086365	0.978595	1911	2	-0.29308	0.47799	0.55164	1	11905	1	-0.29308
hsa-mir-4697	4	0.033865	0.086372	0.978595	1912	2	-0.53063	0.95304	0.95304	1	20409	0	-0.53063
ABCC8	6	0.033891	0.086425	0.978684	1913	1	0.22576	0.084107	0.17303	0.993072	3766	2	0.22576
CEP89	6	0.033932	0.086511	0.978841	1914	3	-0.41162	0.92607	0.92602	1	19816	0	-0.41162
CSN3	6	0.033943	0.086529	0.978841	1915	2	-0.18988	0.87347	0.87353	1	18647	0	-0.18988
MARK3	6	0.033974	0.08659	0.978978	1916	2	0.031947	0.14706	0.25924	1	5591	1	0.031947
DACH2	6	0.034006	0.086643	0.978978	1917	3	-0.29816	0.89494	0.89479	1	19126	0	-0.29816
TRIM7	6	0.034037	0.086698	0.978978	1918	1	-0.11786	0.82456	0.82455	1	17633	0	-0.11786
FKBP4	6	0.034047	0.086722	0.978978	1919	2	-0.4173	0.98947	0.98947	1	21250	0	-0.4173
DPP7	6	0.034213	0.087001	0.979003	1924	3	-0.46352	0.007635	0.024376	0.868195	608	1	-0.46352
ITGAV	6	0.03422	0.087013	0.979003	1925	3	-0.22635	0.036913	0.090861	0.964041	2041	1	-0.22635
YJEFN3	6	0.034232	0.087041	0.979003	1926	3	-0.47004	0.051712	0.11735	0.975627	2601	1	-0.47004
hsa-mir-3184	4	0.034146	0.086894	0.979003	1920	2	-0.74042	0.99317	0.99314	1	21372	0	-0.74042
SWT1	5	0.034148	0.086897	0.979003	1921	2	-1.0206	0.87869	0.87861	1	18758	0	-1.0206
DNAH2	6	0.034183	0.086953	0.979003	1922	1	-0.11154	0.84362	0.84371	1	18008	0	-0.11154
TP53TG3D	4	0.034201	0.086981	0.979003	1923	3	-0.65756	0.80996	0.8099	1	17301	0	-0.65756
PIM3	6	0.034338	0.087245	0.980283	1928	2	0.91651	0.012702	0.03833	0.87963	942	3	0.91651
FOSL2	6	0.034324	0.087216	0.980283	1927	3	-0.56592	0.20502	0.32053	1	6901	2	-0.56592
C4orf22	6	0.03439	0.087345	0.980904	1929	2	-0.46354	0.7887	0.78872	1	16845	0	-0.46354
HIST2H3D	6	0.034427	0.087412	0.980944	1930	2	-0.2952	0.997	0.99707	1	21495	0	-0.2952
EPOR	6	0.034443	0.08744	0.980944	1931	2	-0.2614	0.97765	0.97759	1	20950	0	-0.2614
CORO7	6	0.035377	0.089185	0.983476	1962	3	-0.20935	0.020096	0.058018	0.923377	1355	2	-0.20935
CPNE7	6	0.035061	0.088584	0.983476	1946	1	0.38679	0.040703	0.097772	0.97113	2181	3	0.38679
hsa-mir-4713	4	0.035007	0.088492	0.983476	1943	2	-0.32122	0.077231	0.16144	0.988167	3538	1	-0.32122
METTL3	6	0.034599	0.087742	0.983476	1932	2	-0.36908	0.20513	0.32065	1	6905	1	-0.36908
SUGP2	6	0.034736	0.087991	0.983476	1933	2	-0.1941	0.78713	0.78709	1	16806	0	-0.1941
SLC41A1	6	0.034767	0.088051	0.983476	1934	2	-0.1762	0.73324	0.73475	1	15720	1	-0.1762
hsa-mir-6165	4	0.034779	0.088074	0.983476	1935	2	0.14612	0.56709	0.60627	1	13037	1	0.14612
C16orf13	6	0.034788	0.088089	0.983476	1936	3	-0.37527	0.99714	0.99718	1	21502	0	-0.37527
ERCC4	6	0.034851	0.088201	0.983476	1937	2	-0.11676	0.38942	0.50359	1	10830	1	-0.11676
CCDC109B	6	0.034872	0.088242	0.983476	1938	2	-0.17478	0.91511	0.91503	1	19549	0	-0.17478
RNPS1	6	0.034887	0.088268	0.983476	1939	3	-0.44281	0.31783	0.43508	1	9364	2	-0.44281
LRRC27	6	0.034915	0.088319	0.983476	1940	1	-0.15287	0.97676	0.97673	1	20934	0	-0.15287
ILVBL	6	0.03494	0.088366	0.983476	1941	3	-0.39433	0.57841	0.61379	1	13205	1	-0.39433
GABPB2	6	0.034951	0.088389	0.983476	1942	3	-0.2497	0.76653	0.76658	1	16379	0	-0.2497
ZFYVE9	6	0.035013	0.0885	0.983476	1944	1	-0.029706	0.29873	0.41551	1	8940	1	-0.029706
KIAA1429	6	0.035021	0.088516	0.983476	1945	3	-0.3184	0.37096	0.49001	1	10538	2	-0.3184
NANS	6	0.035082	0.088626	0.983476	1947	2	-0.27182	0.81023	0.81018	1	17305	0	-0.27182
DNASE1	6	0.035092	0.088648	0.983476	1948	3	-0.25408	0.9107	0.91061	1	19459	0	-0.25408
AGRN	6	0.035145	0.08876	0.983476	1949	3	-0.29922	0.79777	0.79775	1	17031	0	-0.29922
SSBP4	6	0.035174	0.088807	0.983476	1950	3	-0.55172	0.99909	0.99908	1	21590	0	-0.55172
LAG3	6	0.035221	0.088892	0.983476	1951	3	-0.70921	0.44802	0.53474	1	11511	1	-0.70921
VN1R5	6	0.035226	0.088903	0.983476	1952	3	-0.24207	0.16386	0.277	1	5944	1	-0.24207
HAUS2	6	0.035261	0.08897	0.983476	1953	2	-0.14862	0.29772	0.41447	1	8922	2	-0.14862
hsa-mir-6888	4	0.035265	0.088977	0.983476	1954	2	-0.98672	0.93136	0.93129	1	19933	0	-0.98672
CELF5	6	0.035272	0.088986	0.983476	1955	3	-0.63449	0.9726	0.97253	1	20833	0	-0.63449
RPL28	6	0.035273	0.088987	0.983476	1956	3	-0.57926	0.921	0.92092	1	19690	0	-0.57926
HOXC8	6	0.035282	0.089001	0.983476	1957	2	-0.038283	0.97652	0.97648	1	20926	0	-0.038283
AAGAB	6	0.035293	0.089021	0.983476	1958	2	-0.26731	0.8603	0.86041	1	18391	0	-0.26731
CCDC104	6	0.035305	0.089046	0.983476	1959	2	-0.38806	0.86026	0.86038	1	18390	0	-0.38806
CERS1	6	0.035356	0.089145	0.983476	1960	2	-0.52228	0.84333	0.8434	1	18004	0	-0.52228
LRR1	6	0.035373	0.089179	0.983476	1961	3	-0.30562	0.33808	0.4559	1	9793	2	-0.30562
RNF40	6	0.035388	0.089206	0.983476	1963	2	-0.071036	0.43694	0.52861	1	11385	1	-0.071036
TAF12	6	0.035403	0.089228	0.983476	1964	1	-0.2163	0.36735	0.4863	1	10458	1	-0.2163
SYT16	6	0.03543	0.089283	0.983476	1965	3	-0.29975	0.39759	0.50782	1	10919	1	-0.29975
hsa-mir-4448	4	0.035431	0.089283	0.983476	1966	1	-0.46753	0.79727	0.79725	1	17021	0	-0.46753
ARL14	6	0.035441	0.089302	0.983476	1967	2	0.19464	0.31558	0.43278	1	9314	2	0.19464
NonTargetingControlGuideForHuman_0738	1	0.035463	0.089345	0.983476	1968	1	-0.93407	0.96454	0.96451	1	20649	0	-0.93407
hsa-mir-345	4	0.036561	0.091297	0.983834	2009	2	-0.60681	0.026142	0.070666	0.950044	1611	1	-0.60681
ZNF891	6	0.036579	0.09133	0.983834	2011	2	-0.072262	0.029833	0.077725	0.954683	1757	2	-0.072262
USP48	6	0.035833	0.089999	0.983834	1980	2	0.13814	0.036274	0.089718	0.963444	2017	3	0.13814
CYP4A11	6	0.035841	0.09001	0.983834	1981	1	0.33419	0.067226	0.14447	0.977386	3202	3	0.33419
VPS72	6	0.035544	0.089474	0.983834	1969	3	-0.29133	0.96174	0.96171	1	20589	0	-0.29133
NPDC1	6	0.035598	0.089582	0.983834	1970	1	0.21923	0.37145	0.49052	1	10550	1	0.21923
GPR174	6	0.03561	0.089605	0.983834	1971	2	-0.044801	0.79488	0.79484	1	16974	0	-0.044801
ERVMER34-1	6	0.035695	0.089754	0.983834	1972	1	0.075168	0.76923	0.76927	1	16435	0	0.075168
CCDC108	6	0.035704	0.08977	0.983834	1973	3	-0.34215	0.21561	0.3311	1	7142	1	-0.34215
SLC39A9	6	0.035716	0.089793	0.983834	1974	3	-0.56968	0.97445	0.97442	1	20877	0	-0.56968
S1PR4	6	0.035737	0.089834	0.983834	1975	3	-0.44503	0.89207	0.89193	1	19054	0	-0.44503
HSD11B2	6	0.035744	0.089844	0.983834	1976	1	0.1993	0.50346	0.56651	1	12226	1	0.1993
OTX1	6	0.035748	0.089855	0.983834	1977	3	-0.31613	0.38905	0.50342	1	10824	1	-0.31613
CAPN14	6	0.035801	0.089943	0.983834	1978	2	0.041125	0.31433	0.43151	1	9285	2	0.041125
C16orf89	6	0.035816	0.089968	0.983834	1979	3	-0.46498	0.19256	0.30752	1	6609	1	-0.46498
RPS29	6	0.035869	0.090062	0.983834	1982	3	-0.31411	0.14413	0.2561	1	5517	2	-0.31411
DSE	6	0.035905	0.090123	0.983834	1983	3	-0.42562	0.89788	0.89777	1	19192	0	-0.42562
SYNGR3	6	0.035935	0.090176	0.983834	1984	3	-0.47131	0.97624	0.97621	1	20921	0	-0.47131
DNAJB7	6	0.035939	0.09018	0.983834	1985	1	-0.098958	0.33703	0.45479	1	9769	1	-0.098958
SIRT6	6	0.035971	0.09024	0.983834	1986	2	-0.21682	0.96155	0.96152	1	20585	0	-0.21682
PCDH11Y	6	0.035987	0.090271	0.983834	1987	3	-0.10113	0.72032	0.72312	1	15469	1	-0.10113
EPHX1	6	0.036036	0.090349	0.983834	1988	3	-0.23475	0.87408	0.87412	1	18660	0	-0.23475
PHF12	6	0.036053	0.090381	0.983834	1989	3	-0.28374	0.95426	0.95424	1	20434	0	-0.28374
NXPE2	6	0.036131	0.090511	0.983834	1990	3	-0.21773	0.69286	0.69927	1	14962	1	-0.21773
LOC389895	6	0.036231	0.090705	0.983834	1991	1	0.33936	0.33393	0.45157	1	9704	2	0.33936
PCDH12	6	0.036237	0.090716	0.983834	1992	3	-0.37259	0.22096	0.33656	1	7250	1	-0.37259
hsa-mir-4669	4	0.036278	0.090785	0.983834	1993	1	0.21139	0.43252	0.52623	1	11328	1	0.21139
DYSF	6	0.036322	0.090865	0.983834	1994	3	-0.17705	0.41236	0.51553	1	11091	1	-0.17705
KRTAP5-11	6	0.036323	0.090869	0.983834	1995	3	-0.74947	0.41679	0.51785	1	11151	1	-0.74947
NMT2	6	0.036328	0.090881	0.983834	1996	1	-0.15311	0.78308	0.78298	1	16712	0	-0.15311
WRB	6	0.036333	0.090891	0.983834	1997	3	-0.30756	0.68785	0.69513	1	14881	1	-0.30756
[truncated: 19,664 more rows]

## Sheet: LP-rich_gRNA
sgrna	Gene	control_count	treatment_count	control_mean	treat_mean	LFC	control_var	adj_var	score	p.low	p.high	p.twosided	FDR	high_in_treatment
HGLibB_18405	GAGE1	2978.9/3033.2/2807.8	521.58/875.39/516.76	2938.4	617.93	-2.2477	13844	112460	6.9194	2.2681e-12	1	4.5361e-12	8.6564e-10	FALSE
HGLibA_18432	GAGE1	2788/2763.1/2605.3	790.91/1001.7/908.19	2717.6	896.1	-1.5995	9818.9	104010	5.6478	8.1252e-09	1	1.625e-08	1.7925e-06	FALSE
HGLibA_26808	LOC100132247	2487.5/2332.7/2438.8	842.17/1075.4/825.79	2418.8	907.7	-1.413	6263.4	92578	4.9664	3.4104e-07	1	6.8209e-07	5.5887e-05	FALSE
HGLibA_18431	GAGE1	1126/1144.8/1094.1	200.98/240.89/314.18	1121.4	247.77	-2.1737	655.75	42922	4.217	1.2349e-05	0.99999	2.4698e-05	0.0014584	FALSE
HGLibB_07723	CCDC22	1351.4/1278.5/1115.6	270.96/369.06/357.1	1244.5	329.31	-1.9148	14598	47631	4.1933	1.374e-05	0.99999	2.7479e-05	0.0016068	FALSE
HGLibB_18858	GDI2	791.93/736.72/862.42	243.29/35.452/73.823	795.37	86.062	-3.1933	3973.7	30442	4.0654	2.1405e-05	0.99998	4.2809e-05	0.0023786	FALSE
HGLibB_09464	CHMP1A	524.91/552.89/521.75	0/113.63/90.991	533	10.018	-5.5988	293.89	20400	3.6616	3.0246e-05	0.99997	6.0492e-05	0.0032246	FALSE
HGLibB_03083	ARPC4	637.61/644.81/646.17	14.646/92.721/101.29	642.85	51.674	-3.6116	21.18	24605	3.7689	6.1187e-05	0.99994	0.00012237	0.0059816	FALSE
HGLibA_16508	FAM21B	1193/1119.7/1183.4	287.23/303.61/516.76	1164.9	355.87	-1.708	1585.8	44585	3.8315	6.3669e-05	0.99994	0.00012734	0.0061988	FALSE
HGLibB_14931	ELOF1	855.9/474.9/483.13	51.263/33.634/47.212	581.25	43.341	-3.7149	48184	22247	3.6064	0.00010653	0.99989	0.00021307	0.0097409	FALSE
HGLibB_10649	COMMD3	1027.5/948.41/901.9	253.87/286.34/212.88	957.88	249.2	-1.9383	4034.1	36662	3.7012	0.00010702	0.99989	0.00021403	0.009774	FALSE
HGLibA_47453	STK11	358.4/221.43/288.33	0/2.7271/38.628	283.9	2.1205	-6.5125	4735.9	10866	2.7032	0.00020514	0.99979	0.00041028	0.017448	FALSE
HGLibA_52609	UBE2G2	328.96/555.68/317.51	0/94.539/92.708	387.18	9.4767	-5.2115	18318	14819	3.1027	0.000224	0.99978	0.000448	0.018851	FALSE
HGLibB_15741	EXOC8	542.17/440.08/290.91	12.205/16.362/16.31	410.97	14.824	-4.7023	16238	15730	3.1586	0.00026781	0.99973	0.00053561	0.022117	FALSE
HGLibB_11370	CSNK1A1	898.54/442.87/523.46	65.095/71.813/150.22	592.79	88.891	-2.7237	60383	22689	3.3453	0.0003694	0.99963	0.00073879	0.029099	FALSE
HGLibA_01619	ALG14	71.071/51.529/94.395	0/0/0.85841	70.186	0.11241	-5.9998	467.47	2686.3	1.352	0.00037977	0.99962	0.00075954	0.029779	FALSE
HGLibB_42804	SCAP	266.01/84.953/141.59	0/0/21.46	147.37	0.49963	-6.6284	9002.3	5640.4	1.9556	0.00039956	0.9996	0.00079913	0.031155	FALSE
HGLibB_36583	PIK3C3	358.4/538.96/416.19	48.822/32.725/13.734	431.6	28.012	-3.8983	8561.4	16519	3.1401	0.00045216	0.99955	0.00090432	0.034625	FALSE
HGLibA_12949	DENND4A	299.51/362.09/280.61	0/80.903/43.779	312.21	6.9836	-5.294	1824.1	11950	2.7922	0.00047406	0.99953	0.00094813	0.035934	FALSE
HGLibA_13191	DHX36	214.23/330.06/260.01	0/29.089/21.46	263.93	3.8776	-5.7633	3429.6	10102	2.5874	0.00051739	0.99948	0.0010348	0.038873	FALSE
HGLibB_26202	LDLR	697.51/899.67/656.47	129.38/260.89/217.18	744.07	194.26	-1.932	17026	28479	3.258	0.00055576	0.99944	0.0011115	0.041443	FALSE
HGLibA_10660	COMMD3	577.71/683.8/423.06	134.26/87.267/48.929	550.83	83.081	-2.7144	17365	21082	3.2214	0.00056355	0.99944	0.0011271	0.04188	FALSE
HGLibB_48092	TAC1	78.178/36.209/107.27	0/1.8181/0	67.225	0.16768	-5.8686	1342.6	2573	1.322	0.0006052	0.99939	0.0012104	0.044409	FALSE
HGLibB_49231	THAP10	26.398/76.597/53.204	0/0/0	47.571	0	-5.602	661.28	1820.7	1.1149	0.00063224	0.99937	0.0012645	0.046012	FALSE
HGLibA_15749	EXOC4	848.79/430.34/610.99	113.1/121.81/121.89	606.57	118.86	-2.3417	44874	23216	3.2009	0.00065077	0.99935	0.0013015	0.04713	FALSE
HGLibA_03554	ATP11A	166.51/196.37/137.3	0/0.90903/17.168	164.97	1.1033	-6.3021	876.86	6313.9	2.0622	0.00066389	0.99934	0.0013278	0.04792	FALSE
HGLibB_11368	CSNK1A1	534.05/657.34/294.34	35.802/79.085/46.354	469.26	50.825	-3.1817	35085	17960	3.1223	0.00066619	0.99933	0.0013324	0.048029	FALSE
HGLibB_18407	GAGE1	4452.1/4205.9/4586.7	3447.6/2918.9/2948.6	4412.1	3095.9	-0.51096	37312	168870	3.2029	0.00068035	0.99932	0.0013607	0.048917	FALSE
HGLibA_29887	MRPL1	144.17/80.775/106.41	0/16.362/0	107.41	0.44806	-6.2263	1030.9	4111.1	1.6682	0.00072325	0.99928	0.0014465	0.051567	FALSE
HGLibB_33393	OPN4	18.275/91.916/44.623	0/0/0	42.187	0	-5.4325	1525.3	1614.7	1.0499	0.00073246	0.99927	0.0014649	0.052053	FALSE
HGLibA_24017	KAL1	37.566/38.995/44.623	0/0/0	40.283	0	-5.3675	13.938	1541.8	1.0259	0.00077352	0.99923	0.001547	0.054548	FALSE
HGLibB_50328	TMEM39B	54.826/59.885/19.737	0/0/0	40.181	0	-5.3639	510.34	1537.9	1.0246	0.00077582	0.99922	0.0015516	0.054694	FALSE
HGLibB_18808	GCSH	97.469/32.031/17.163	0/0/0	37.725	0	-5.2752	2012.3	1443.9	0.99281	0.00083428	0.99917	0.0016686	0.058181	FALSE
HGLibB_39732	RAB10	641.67/587.71/562.08	163.55/143.63/84.124	596.24	125.49	-2.2393	1651.8	22821	3.1162	0.00087642	0.99912	0.0017528	0.060677	FALSE
HGLibB_00658	ACTR3	307.64/477.69/279.75	3.2548/30.907/57.513	345.13	18.064	-4.1824	11626	13210	2.8457	0.00087956	0.99912	0.0017591	0.060859	FALSE
HGLibA_56931	ZNHIT6	23.352/48.744/40.332	0/0/0	35.812	0	-5.2021	171.46	1370.7	0.9673	0.00088458	0.99912	0.0017692	0.061136	FALSE
HGLibB_29956	MRPL46	79.193/100.27/123.57	0/20.908/0	99.373	0.49446	-6.0696	496.79	3803.4	1.6033	0.00092869	0.99907	0.0018574	0.063834	FALSE
HGLibA_15763	EXOC8	532.02/568.21/671.92	150.53/122.72/101.29	587.83	123.23	-2.2449	5285.5	22499	3.0974	0.0009316	0.99907	0.0018632	0.063997	FALSE
HGLibB_26845	LOC100996485	41.627/25.068/36.9	0/0/0	33.771	0	-5.1198	73.626	1292.5	0.93933	0.00094357	0.99906	0.0018871	0.06467	FALSE
HGLibA_24091	KAZN	91.377/20.89/19.737	0/0/0	33.546	0	-5.1104	1847.6	1283.9	0.9362	0.00095042	0.99905	0.0019008	0.065028	FALSE
HGLibB_35883	PDPK1	22.337/30.639/54.062	0/0/0	33.328	0	-5.1013	278.98	1275.6	0.93316	0.00095715	0.99904	0.0019143	0.065469	FALSE
HGLibA_48075	SYT3	169.55/143.45/129.58	4.0685/0/5.1504	146.61	1.1983	-6.0693	413.27	5611.5	1.9412	0.00097949	0.99902	0.001959	0.066825	FALSE
HGLibB_30789	MYO1E	89.346/37.602/9.4395	0/0/0	31.704	0	-5.0314	1926.6	1213.4	0.91014	0.0010098	0.99899	0.0020195	0.068616	FALSE
HGLibB_51260	TRAPPC4	145.19/97.487/68.651	0/0/25.752	99.052	0.53704	-6.0244	1527.6	3791.1	1.6	0.0010154	0.99898	0.0020308	0.068961	FALSE
HGLibA_48259	TAF8	557.4/572.39/367.28	100.9/33.634/117.6	489.35	73.643	-2.7157	13213	18729	3.0376	0.001018	0.99898	0.002036	0.069097	FALSE
HGLibB_54094	WDR7	854.88/612.78/716.54	217.26/182.71/230.91	721.36	209.28	-1.7804	14821	27609	3.0818	0.0010216	0.99898	0.0020433	0.069285	FALSE
HGLibB_08860	CDR2	85.285/26.461/60.927	0/0/2.5752	51.627	0.19908	-5.4558	926.36	1976	1.1569	0.0010403	0.99896	0.0020805	0.070408	FALSE
HGLibA_59963	hsa-mir-4312	26.398/73.812/13.73	0/0/0	29.932	0	-4.951	1100.2	1145.6	0.88433	0.0010726	0.99893	0.0021452	0.072167	FALSE
HGLibB_03683	ATP5O	291.39/172.69/181.07	9.7643/0/51.504	208.87	3.6061	-5.5098	4445.9	7994.1	2.2957	0.0011126	0.99889	0.0022251	0.074315	FALSE
HGLibB_40447	RBM17	82.239/61.278/106.41	0/0/14.593	81.246	0.42768	-5.8482	516.44	3109.6	1.4493	0.0011478	0.99885	0.0022956	0.076368	FALSE
HGLibB_39341	PTMA	28.428/61.278/13.73	0/0/0.85841	28.832	0.11241	-4.7451	640.48	1103.5	0.86454	0.0011492	0.99885	0.0022983	0.076432	FALSE
HGLibB_40897	RFT1	56.857/16.712/21.453	0/0/0	27.33	0	-4.8243	509.55	1046	0.84502	0.0011769	0.99882	0.0023539	0.078001	FALSE
HGLibA_12029	CYCS	41.627/25.068/18.879	0/0/0	27.013	0	-4.808	141.76	1033.9	0.84011	0.0011908	0.99881	0.0023815	0.078722	FALSE
HGLibA_18932	GET4	226.41/359.31/268.6	0/113.63/105.58	279.57	10.532	-4.6046	4652.3	10700	2.6009	0.0012145	0.99879	0.0024291	0.080116	FALSE
HGLibA_49947	TMEM134	72.086/50.136/54.921	0/0/5.1504	58.334	0.27445	-5.5409	133.99	2232.7	1.2287	0.0012174	0.99878	0.0024349	0.080262	FALSE
HGLibB_56656	ZNF776	89.346/146.23/35.183	0/0/14.593	77.196	0.42768	-5.7753	3339.2	2954.6	1.4123	0.0012485	0.99875	0.002497	0.081931	FALSE
HGLibB_37521	POLR2C	83.255/139.27/69.509	0/32.725/0	93.065	0.58982	-5.8867	1392.9	3562	1.5495	0.0012524	0.99875	0.0025048	0.082138	FALSE
HGLibB_45837	SNAPC2	42.643/32.031/12.014	0/0/0	25.428	0	-4.724	259.94	973.25	0.81509	0.0012642	0.99874	0.0025284	0.082839	FALSE
HGLibA_57907	hsa-mir-153-1	53.811/16.712/17.163	0/0/0	24.911	0	-4.6955	481.23	953.45	0.80676	0.0012898	0.99871	0.0025796	0.084266	FALSE
HGLibB_01282	AHCTF1	77.163/58.492/56.637	0/0/7.7257	63.466	0.32773	-5.6015	129.49	2429.1	1.2811	0.0012904	0.99871	0.0025808	0.084284	FALSE
HGLibA_54143	WDR61	155.34/80.775/35.183	0/15.453/0	76.164	0.43779	-5.746	3984.8	2915.1	1.4025	0.0013063	0.99869	0.0026126	0.08518	FALSE
HGLibA_37632	POLR3H	45.688/123.95/103.83	0/0/23.177	83.788	0.51514	-5.8063	1733.1	3206.9	1.4705	0.0013141	0.99869	0.0026282	0.085572	FALSE
HGLibA_20899	HAVCR1	186.82/279.93/193.08	0/20.908/53.221	216.14	4.7205	-5.2463	2730.3	8272.5	2.3245	0.0013197	0.99868	0.0026394	0.085868	FALSE
HGLibA_42858	SCAP	248.75/455.4/308.07	59.4/4.5451/30.903	326.79	20.363	-3.9396	11491	12508	2.7399	0.0013359	0.99866	0.0026719	0.08677	FALSE
HGLibA_36310	PHAX	67.01/5.5707/34.325	0/0/0	23.474	0	-4.6132	1166.8	898.45	0.78314	0.0013658	0.99863	0.0027315	0.088406	FALSE
HGLibB_45782	SMTNL2	24.367/20.89/24.886	0/0/0	23.312	0	-4.6036	4.7282	892.23	0.78043	0.0013748	0.99863	0.0027496	0.088824	FALSE
HGLibA_46592	SPDYE3	31.474/34.817/10.298	0.81369/0/0	22.448	0.10906	-4.402	191.05	859.16	0.76211	0.0014248	0.99858	0.0028496	0.091681	FALSE
HGLibB_09830	CLCN7	12.184/55.707/16.305	0/0/0	22.304	0	-4.5425	627.08	853.67	0.76338	0.0014334	0.99857	0.0028668	0.092136	FALSE
HGLibA_13156	DHRSX_X	627.45/467.94/415.34	125.31/103.63/55.796	495.9	89.823	-2.4518	12290	18980	2.9475	0.0014425	0.99856	0.0028849	0.09265	FALSE
HGLibA_00068	AARS	35.535/20.89/14.588	0/0/0	22.131	0	-4.5317	119.06	847.04	0.76041	0.0014439	0.99856	0.0028878	0.092711	FALSE
HGLibA_16380	FAM196A	68.025/47.351/42.907	0/5.4542/0	51.704	0.28154	-5.362	181.36	1978.9	1.1559	0.0014699	0.99853	0.0029397	0.09415	FALSE
HGLibA_15060	EML2	31.474/26.461/12.014	0/0/0	21.558	0	-4.4956	106.73	825.11	0.7505	0.0014796	0.99852	0.0029592	0.094697	FALSE
HGLibA_07101	CAMLG	136.05/80.775/84.955	65.909/0/0	97.739	0.7707	-5.8012	959.47	3740.9	1.5854	0.0014988	0.9985	0.0029975	0.095746	FALSE
HGLibB_13619	DNAJC8	24.367/22.283/17.163	0/0/0	21.045	0	-4.4624	13.821	805.47	0.74151	0.0015129	0.99849	0.0030259	0.096547	FALSE
HGLibA_41331	RIPPLY2	87.316/107.24/36.9	0/0/16.31	70.182	0.44748	-5.6199	1387.1	2686.2	1.3455	0.0015185	0.99848	0.003037	0.096849	FALSE
HGLibB_25964	LAMTOR5	38.581/15.319/15.446	0/0/0	20.909	0	-4.4534	186.7	800.26	0.73911	0.001522	0.99848	0.0030439	0.096977	FALSE
HGLibA_51233	TRABD2B	18.275/27.853/17.163	0/0/0	20.598	0	-4.4328	34.919	788.37	0.7336	0.001543	0.99846	0.003086	0.098152	FALSE
HGLibA_62985	hsa-mir-663a	33.505/68.241/12.872	0/0/1.7168	30.9	0.16289	-4.7778	863.07	1182.7	0.89378	0.0015507	0.99845	0.0031014	0.098563	FALSE
HGLibB_32629	NRF1	24.367/9.7487/36.042	0/0/0	20.474	0	-4.4245	186.27	783.63	0.73139	0.0015515	0.99845	0.0031031	0.098589	FALSE
HGLibB_55092	ZFAND5	32.49/27.853/9.4395	0/0/0	20.46	0	-4.4235	160.42	783.07	0.73113	0.0015525	0.99845	0.0031051	0.098627	FALSE
HGLibB_56356	ZNF626	7.1071/34.817/34.325	0/0/0	20.438	0	-4.4221	288.66	782.24	0.73075	0.001554	0.99845	0.0031081	0.09867	FALSE
HGLibB_03918	AXIN1	252.81/332.85/136.44	0/82.721/31.761	225.6	6.3141	-4.9533	10096	8634.7	2.3599	0.0015575	0.99844	0.0031149	0.098782	FALSE
HGLibA_49468	TIGD3	30.459/115.59/15.446	0/2.7271/0	37.921	0.20463	-5.0139	3296.8	1451.4	0.99001	0.0015582	0.99844	0.0031164	0.098801	FALSE
HGLibA_13550	DNAJB6	49.75/11.141/18.021	0/0.90903/0	21.555	0.11609	-4.3369	457.94	824.99	0.7464	0.0015754	0.99842	0.0031507	0.09968	FALSE
HGLibB_45918	SNRPC	90.362/69.634/29.177	0/0/8.5841	56.848	0.34283	-5.4289	1026.2	2175.8	1.2114	0.0015774	0.99842	0.0031547	0.099738	FALSE
HGLibA_52325	TUFM	100.51/27.853/34.325	0/4.5451/0	45.819	0.25947	-5.2162	1723.2	1753.7	1.0879	0.0015795	0.99842	0.0031589	0.099753	FALSE
HGLibA_07342	CASS4	99.499/65.456/14.588	0/4.5451/0	45.673	0.25947	-5.2117	2127.4	1748.1	1.0862	0.0015857	0.99841	0.0031714	0.10006	FALSE
HGLibB_31048	NANOG	85.285/61.278/40.332	0/0/10.301	59.517	0.37028	-5.4648	517.57	2278	1.2393	0.001599	0.9984	0.003198	0.10075	FALSE
HGLibA_36677	PIM2	99.499/66.848/36.042	0/0/12.018	62.13	0.39485	-5.5001	1049.7	2378	1.266	0.0016046	0.9984	0.0032093	0.10102	FALSE
HGLibB_00762	ADAM28	124.88/75.204/48.055	0/0/26.611	76.713	0.54401	-5.6534	1571.9	2936.1	1.4057	0.0016068	0.99839	0.0032135	0.10113	FALSE
HGLibA_23217	ILF3	74.117/26.461/22.311	0/0/2.5752	35.251	0.19908	-4.918	877.62	1349.2	0.95428	0.0016452	0.99835	0.0032904	0.10333	FALSE
HGLibA_37692	POP5	17.26/68.241/39.474	0/2.7271/0	35.976	0.20463	-4.9399	701.78	1376.9	0.964	0.0016535	0.99835	0.0033069	0.1038	FALSE
HGLibB_05465	C16orf62	392.92/100.27/242.85	0/34.543/51.504	212.31	5.5334	-5.029	23052	8126.1	2.2939	0.0016593	0.99834	0.0033186	0.10407	FALSE
HGLibB_31856	NHLRC2	309.67/313.35/462.53	11.392/64.541/46.354	355.38	32.457	-3.4131	7669.1	13602	2.7689	0.0016595	0.99834	0.003319	0.10407	FALSE
HGLibA_07554	CCDC115	581.77/469.33/361.27	27.666/159.08/106.44	462.05	77.699	-2.5568	12270	17685	2.8902	0.0016693	0.99833	0.0033387	0.10457	FALSE
HGLibA_10658	COMMD3	556.38/288.28/547.49	39.057/96.357/94.425	444.49	70.841	-2.6325	23765	17012	2.8647	0.0017601	0.99824	0.0035203	0.10932	FALSE
HGLibB_26245	LELP1	25.382/19.497/11.156	0/0/0	17.68	0	-4.2234	52.598	676.7	0.67966	0.0017688	0.99823	0.0035375	0.10974	FALSE
HGLibB_44133	SIN3B	34.52/58.492/33.467	0/0/4.292	40.735	0.25282	-5.058	203.38	1559.1	1.0252	0.0017732	0.99823	0.0035465	0.10999	FALSE
HGLibB_55211	ZFYVE20	128.94/54.314/60.927	0/0/31.761	75.292	0.583	-5.5908	1762.4	2881.7	1.3917	0.0017753	0.99822	0.0035506	0.11009	FALSE
HGLibA_43699	SF3B1	29.444/22.283/30.035	0/0/1.7168	27.011	0.16289	-4.5902	18.708	1033.8	0.83501	0.0017799	0.99822	0.0035598	0.11026	FALSE
HGLibB_16547	FAM32A	24.367/18.105/12.014	0/0/0	17.439	0	-4.2047	38.936	667.48	0.67502	0.00179	0.99821	0.0035801	0.1108	FALSE
HGLibA_12527	DCPS	224.38/444.26/393.88	41.498/11.817/51.504	339.89	29.365	-3.4888	13576	13009	2.7225	0.0018005	0.9982	0.003601	0.11124	FALSE
HGLibA_38484	PRIM2	49.75/2.7853/39.474	0/0/0.85841	17.755	0.11241	-4.0755	859.74	679.55	0.67678	0.0018166	0.99818	0.0036331	0.11203	FALSE
HGLibA_07730	CCDC22	42.643/66.848/96.969	0/19.999/0	65.147	0.48576	-5.4764	760.99	2493.4	1.2949	0.0018446	0.99816	0.0036893	0.11344	FALSE
HGLibB_37345	PNN	29.444/37.602/104.69	0/0/7.7257	48.771	0.32773	-5.2283	1812.7	1866.7	1.1212	0.0018462	0.99815	0.0036924	0.11351	FALSE
HGLibB_11304	CSDE1	302.56/107.24/330.38	0/69.995/48.929	220.5	6.9046	-4.8085	15818	8439.6	2.3251	0.0018568	0.99814	0.0037136	0.11398	FALSE
HGLibA_47779	SUMO2	443.69/675.45/364.71	54.517/97.266/138.2	478.12	90.166	-2.3938	26493	18300	2.8679	0.0018622	0.99814	0.0037244	0.11423	FALSE
HGLibA_44349	SLC10A7	46.704/48.744/45.481	0/7.2722/0	46.957	0.31931	-5.1839	2.7171	1797.2	1.1001	0.0018867	0.99811	0.0037734	0.11564	FALSE
HGLibA_39882	RAB33B	78.178/26.461/8.5813	0/1.8181/0	26.131	0.16768	-4.5382	1508.5	1000.2	0.82098	0.0018937	0.99811	0.0037875	0.11598	FALSE
HGLibB_18661	GATAD2A	77.163/32.031/54.921	9.7643/0/0	51.4	0.36205	-5.2657	525.63	1967.3	1.1507	0.0019068	0.99809	0.0038136	0.11666	FALSE
HGLibB_45813	SNAI2	19.291/30.639/6.8651	0/0/0	15.972	0	-4.0851	154.53	611.31	0.64599	0.0019306	0.99807	0.0038613	0.11788	FALSE
HGLibB_55216	ZFYVE21	112.7/140.66/58.353	0/0/131.34	97.443	0.9954	-5.6245	1814.2	3729.5	1.5793	0.0019524	0.99805	0.0039049	0.11903	FALSE
HGLibA_29934	MRPL23	141.13/86.346/19.737	0/0/19.743	62.232	0.48327	-5.4138	4305.8	2381.9	1.2652	0.0019616	0.99804	0.0039232	0.1195	FALSE
HGLibA_12627	DDO	43.658/27.853/11.156	0/0/1.7168	23.867	0.16289	-4.4185	284.57	913.5	0.78429	0.0020091	0.99799	0.0040182	0.12196	FALSE
HGLibB_55353	ZMYND15	80.209/19.497/15.446	0/0/2.5752	28.931	0.19908	-4.6416	1450.1	1107.3	0.86344	0.0020302	0.99797	0.0040604	0.12312	FALSE
HGLibA_08777	CDK5R1	71.071/59.885/44.623	0/0/16.31	57.483	0.44748	-5.3364	177.89	2200.1	1.216	0.0020304	0.99797	0.0040607	0.12312	FALSE
HGLibA_35591	PCGF1	24.367/2.7853/48.914	0/0/0	15.025	0	-4.0023	692.76	575.07	0.62655	0.0020327	0.99797	0.0040654	0.1232	FALSE
HGLibA_06684	C9orf139	9.1377/59.885/6.0069	0/0/0	14.913	0	-3.9922	1067.6	570.79	0.62422	0.0020454	0.99795	0.0040908	0.12381	FALSE
HGLibA_18635	GARS	55.841/75.204/45.481	0/0/17.168	57.592	0.45686	-5.3298	229.97	2204.3	1.2169	0.0020678	0.99793	0.0041356	0.12504	FALSE
HGLibA_31957	NIPAL1	30.459/27.853/78.948	0/0/6.0088	40.621	0.29384	-5.0076	867.62	1554.7	1.0228	0.0020688	0.99793	0.0041376	0.12505	FALSE
HGLibB_47678	SULT1A2	1186.9/1236.7/1304.4	779.52/534.51/563.11	1241.7	616.77	-1.0083	3478.1	47526	2.8667	0.0020741	0.99793	0.0041482	0.12523	FALSE
HGLibB_26793	LOC100288332	1248.8/1245/908.76	531.34/588.14/475.56	1122.1	529.69	-1.0816	38342	42949	2.8588	0.0021265	0.99787	0.004253	0.12785	FALSE
HGLibB_32926	NUDT21	122.85/193.58/196.51	0/48.178/10.301	167.19	3.5893	-5.1957	1761.1	6399.1	2.0452	0.0021512	0.99785	0.0043025	0.12917	FALSE
HGLibA_30957	N4BP2L2	55.841/43.173/81.523	0/19.999/0	58.144	0.48576	-5.315	388	2225.4	1.2222	0.0021705	0.99783	0.004341	0.1302	FALSE
HGLibB_46563	SPEM1	284.28/254.86/214.53	0/105.45/159.66	249.56	11.803	-4.2907	1230.3	9551.9	2.4328	0.0021717	0.99783	0.0043435	0.13024	FALSE
HGLibB_14180	DUX2	32.49/33.424/19.737	0/2.7271/0	27.781	0.20463	-4.5784	59.361	1063.3	0.84569	0.002175	0.99783	0.00435	0.1304	FALSE
HGLibA_51079	TP53TG3	1498.6/1557/1372.2	905.64/648.14/862.7	1473.9	797.07	-0.88601	8934.2	56411	2.8496	0.0021889	0.99781	0.0043778	0.13112	FALSE
HGLibB_42816	SCARB1	357.39/473.51/502.87	34.989/117.26/108.16	439.85	76.293	-2.5119	5952.1	16835	2.802	0.0021906	0.99781	0.0043812	0.13117	FALSE
HGLibB_28004	MAML2	57.872/61.278/18.879	0/0/6.8672	40.622	0.31148	-4.9881	598.48	1554.8	1.0223	0.0021935	0.99781	0.0043869	0.13131	FALSE
HGLibA_26051	LAS1L	73.102/29.246/28.318	0/6.3632/0	39.275	0.30131	-4.9519	682.43	1503.2	1.0052	0.0022065	0.99779	0.0044131	0.132	FALSE
HGLibB_10581	COL5A3	21.321/26.461/4.2907	0/0/0	13.469	0	-3.8549	157.35	515.5	0.59321	0.0022245	0.99778	0.004449	0.1329	FALSE
HGLibB_13317	DLG5	60.918/44.566/49.772	0/0/14.593	51.316	0.42768	-5.1955	70.076	1964.1	1.1483	0.0022592	0.99774	0.0045184	0.13471	FALSE
HGLibB_42330	RTF1	85.285/45.958/66.076	0/0/31.761	63.746	0.583	-5.354	392.89	2439.8	1.2787	0.0022885	0.99771	0.0045769	0.13628	FALSE
HGLibB_56017	ZNF486	67.01/13.927/45.481	0/0/5.1504	34.909	0.27445	-4.8164	791.25	1336.1	0.94752	0.0022949	0.99771	0.0045899	0.13657	FALSE
HGLibA_22118	HS2ST1	58.887/77.99/53.204	0/29.998/0	62.519	0.57016	-5.3382	169.65	2392.8	1.2664	0.0023016	0.9977	0.0046032	0.13689	FALSE
HGLibA_47073	SRSF2	81.224/27.853/72.083	0/0/18.885	54.647	0.47474	-5.2378	864.12	2091.6	1.1845	0.0023086	0.99769	0.0046172	0.13721	FALSE
HGLibB_41678	RNPS1	31.474/9.7487/30.893	0/1.8181/0	21.181	0.16768	-4.2476	165.48	810.68	0.73802	0.0023142	0.99769	0.0046284	0.13747	FALSE
HGLibB_15711	EXOC2	482.27/665.7/539.77	72.419/201.8/212.03	557.52	145.8	-1.9277	8840.3	21338	2.8185	0.0023451	0.99765	0.0046903	0.13907	FALSE
HGLibB_04458	BGLAP	40.612/34.817/28.318	0/0/5.1504	34.212	0.27445	-4.7881	38.029	1309.5	0.93787	0.0023462	0.99765	0.0046924	0.1391	FALSE
HGLibA_27599	LTBP4	78.178/29.246/59.211	0/0/16.31	51.357	0.44748	-5.1768	634.98	1965.6	1.1483	0.0023619	0.99764	0.0047239	0.1398	FALSE
HGLibB_42454	RXRA	49.75/89.131/22.311	0/11.817/0	46.268	0.39211	-5.0855	1211.6	1770.9	1.0902	0.0023622	0.99764	0.0047244	0.1398	FALSE
HGLibA_31912	NHP2L1	45.688/69.634/37.758	0/14.544/0	49.345	0.4271	-5.1407	279.63	1888.6	1.1256	0.0023733	0.99763	0.0047467	0.14036	FALSE
HGLibB_15728	EXOC4	131.99/231.18/193.94	11.392/0/109.02	180.88	4.9053	-4.9449	2545.6	6923	2.115	0.0023964	0.9976	0.0047929	0.14138	FALSE
HGLibA_49806	TMED2	99.499/79.382/49.772	0/61.814/0	73.26	0.75231	-5.4053	638.84	2804	1.3693	0.0023977	0.9976	0.0047953	0.14141	FALSE
HGLibA_42018	RPN1	19.291/84.953/66.076	0/13.635/0	47.689	0.41596	-5.1037	1266.6	1825.3	1.1065	0.0024135	0.99759	0.004827	0.14221	FALSE
HGLibB_00087	AATF	99.499/54.314/43.765	0/0/32.619	61.848	0.58908	-5.3056	900.69	2367.2	1.2591	0.0024157	0.99758	0.0048315	0.14227	FALSE
HGLibB_53810	VSX1	229.46/348.17/165.62	0/84.539/159.66	236.52	10.958	-4.312	8770.9	9052.8	2.3707	0.002431	0.99757	0.0048619	0.14295	FALSE
HGLibB_29905	MRPL3	47.719/66.848/62.644	0/27.271/0	58.465	0.54928	-5.2624	101.61	2237.7	1.2243	0.0024376	0.99756	0.0048752	0.1432	FALSE
HGLibA_52439	TXNL4A	15.229/103.06/34.325	7.3232/0/0	37.8	0.32027	-4.8771	2390	1446.7	0.98536	0.0024513	0.99755	0.0049026	0.14372	FALSE
HGLibA_22461	HYOU1	57.872/26.461/36.042	0/0/7.7257	38.079	0.32773	-4.8793	265.45	1457.4	0.98886	0.0024877	0.99751	0.0049754	0.14569	FALSE
HGLibB_17028	FBXO24	51.78/40.387/31.751	0/0/9.4425	40.496	0.35697	-4.9345	101.91	1549.9	1.0195	0.0025245	0.99748	0.0050489	0.14751	FALSE
HGLibA_30269	MSTO1	290.38/441.48/307.21	100.9/39.997/12.876	340.23	37.356	-3.1532	6913.3	13022	2.6541	0.0025451	0.99745	0.0050901	0.14835	FALSE
HGLibA_07058	CAMK1	31.474/66.848/47.197	0/0/14.593	46.313	0.42768	-5.0505	321.34	1772.6	1.0899	0.0025746	0.99743	0.0051492	0.14963	FALSE
HGLibA_63917	hsa-mir-7641-1	61.933/19.497/9.4395	0/0/2.5752	22.535	0.19908	-4.2948	866.47	862.51	0.76054	0.0025944	0.99741	0.0051888	0.15058	FALSE
HGLibA_27810	LZTS2	71.071/54.314/122.71	0/2.7271/3.4336	77.958	0.89966	-5.3773	1304.7	2983.8	1.4107	0.0026007	0.9974	0.0052014	0.15082	FALSE
HGLibB_47557	STX10	26.398/37.602/127	0/0/19.743	50.163	0.48327	-5.1082	3313.5	1919.9	1.1338	0.0026312	0.99737	0.0052625	0.15207	FALSE
HGLibA_35891	PDILT	242.66/254.86/205.95	0/101.81/145.93	233.54	11.317	-4.2511	649.37	8938.4	2.3505	0.0026404	0.99736	0.0052808	0.15247	FALSE
HGLibB_07369	CAV1	43.658/51.529/56.637	0/0/20.602	50.32	0.49156	-5.1046	42.873	1926	1.1354	0.0026658	0.99733	0.0053317	0.15355	FALSE
HGLibB_08694	CDHR2	39.597/73.812/89.246	0/0/48.071	63.9	0.6839	-5.2683	665.65	2445.7	1.2783	0.0026786	0.99732	0.0053572	0.15417	FALSE
HGLibA_30155	MS4A5	112.7/119.77/26.602	0/0/74.681	71.106	0.80768	-5.3179	3039.3	2721.5	1.3475	0.0026987	0.9973	0.0053974	0.15518	FALSE
HGLibA_15582	ESR1	69.04/57.1/45.481	31.734/0/0	56.39	0.58281	-5.1802	139.77	2158.3	1.2013	0.0027198	0.99728	0.0054397	0.15613	FALSE
HGLibB_34534	OR9K2	143.16/62.67/58.353	0/0.90903/12.876	80.604	0.994	-5.3549	2364.8	3085	1.4333	0.0027232	0.99728	0.0054464	0.15625	FALSE
HGLibA_63578	hsa-mir-6851	36.551/11.141/53.204	0/4.5451/0	27.904	0.25947	-4.5204	497.93	1068	0.84591	0.0027475	0.99725	0.005495	0.15738	FALSE
HGLibB_19799	GPN2	50.765/90.524/26.602	0/0/21.46	49.643	0.49963	-5.0777	1101.7	1900.1	1.1274	0.0027576	0.99724	0.0055151	0.15788	FALSE
HGLibB_14216	DYNC1I2	255.86/66.848/59.211	0/1.8181/20.602	100.44	1.4835	-5.3521	13491	3844.3	1.596	0.0027658	0.99723	0.0055315	0.15831	FALSE
HGLibA_28791	MED26	457.9/451.23/246.28	32.548/82.721/51.504	370.57	51.767	-2.8159	14789	14183	2.6769	0.0027873	0.99721	0.0055746	0.15928	FALSE
HGLibA_59805	hsa-mir-4275	119.81/44.566/9.4395	0/0/9.4425	37.006	0.35697	-4.8078	3836.4	1416.4	0.97381	0.0028	0.9972	0.0055999	0.15991	FALSE
HGLibB_53415	UXT	244.69/165.73/166.48	0/84.539/32.619	189	6.4182	-4.6788	2075	7233.7	2.1467	0.0028093	0.99719	0.0056186	0.16034	FALSE
HGLibA_42857	SCAP	307.64/242.32/247.14	13.019/24.544/17.168	264.12	17.64	-3.8302	1328.5	10109	2.4515	0.0028178	0.99718	0.0056356	0.16075	FALSE
HGLibA_03085	ARPC4	126.91/185.23/154.46	0/24.544/23.177	153.7	3.7567	-5.0234	855.99	5882.8	1.955	0.002819	0.99718	0.0056381	0.16079	FALSE
HGLibB_36794	PKN2	53.811/65.456/14.588	9.7643/0/0	37.204	0.36205	-4.8099	792.71	1423.9	0.97632	0.002823	0.99718	0.005646	0.16095	FALSE
HGLibA_06253	C3orf58	196.97/317.53/151.89	0/53.633/142.5	211.79	9.0506	-4.4041	7494.2	8106.2	2.2518	0.0028657	0.99713	0.0057314	0.16294	FALSE
HGLibA_04125	BAIAP2L1	171.59/320.31/139.88	0/60.905/68.672	197.37	7.3862	-4.564	9542.9	7554.1	2.1859	0.0028678	0.99713	0.0057357	0.16302	FALSE
HGLibA_05332	C14orf166	151.28/23.675/38.616	0/0/27.469	51.744	0.55084	-5.0879	5433.8	1980.4	1.1503	0.002883	0.99712	0.005766	0.16361	FALSE
HGLibA_42792	SBDS	55.841/43.173/61.786	0/0/30.044	53.01	0.5705	-5.1039	90.898	2028.9	1.1642	0.002893	0.99711	0.0057859	0.16398	FALSE
HGLibB_06724	C9orf40	89.346/55.707/57.495	0/0/66.956	65.9	0.77528	-5.2359	362.14	2522.3	1.2967	0.0029054	0.99709	0.0058107	0.16461	FALSE
HGLibB_49687	TMC1	53.811/58.492/36.9	0/0/23.177	48.792	0.51514	-5.0384	130.35	1867.5	1.1172	0.0029074	0.99709	0.0058148	0.16465	FALSE
HGLibB_37523	POLR2D	33.505/76.597/21.453	0/0/11.159	38.056	0.38288	-4.8198	890.88	1456.6	0.98712	0.0029103	0.99709	0.0058207	0.16477	FALSE
HGLibA_39718	QARS	20.306/50.136/54.062	0/0/11.159	38.05	0.38288	-4.8196	358.66	1456.3	0.98703	0.0029109	0.99709	0.0058218	0.16477	FALSE
HGLibB_45836	SNAPC2	338.09/118.38/79.806	24.411/0/18.885	147.29	3.4968	-5.0433	20898	5637.3	1.9151	0.002912	0.99709	0.0058241	0.16477	FALSE
HGLibA_11812	CWC15	106.61/25.068/60.927	0/34.543/0	54.625	0.60233	-5.1175	1807.7	2090.7	1.1815	0.0029355	0.99706	0.0058711	0.16572	FALSE
HGLibA_34157	OR52E2	4.0612/26.461/7.7232	0/0/0	9.4268	0	-3.3822	160.92	360.8	0.49628	0.0029385	0.99706	0.0058769	0.16582	FALSE
HGLibA_45931	SNN	48.734/192.19/71.225	0/4.5451/5.1504	87.393	1.2461	-5.2985	6369	3344.9	1.4895	0.0029844	0.99702	0.0059688	0.16785	FALSE
HGLibA_56659	ZNF74	9.1377/32.031/2.5744	0/0/0	9.1592	0	-3.3447	283.25	350.56	0.48919	0.0030024	0.997	0.0060049	0.16859	FALSE
HGLibB_43583	SETD1A	760.46/614.17/584.39	304.32/180.9/183.7	648.67	216.25	-1.5803	8909.7	24827	2.7443	0.0030125	0.99699	0.006025	0.16912	FALSE
HGLibA_41634	RNF217	48.734/32.031/59.211	0/19.999/0	45.217	0.48576	-4.9592	191.03	1730.7	1.0752	0.0030144	0.99699	0.0060288	0.16918	FALSE
HGLibB_44036	SHROOM2	61.933/100.27/75.516	0/0/151.08	77.695	1.0477	-5.2642	381.46	2973.7	1.4056	0.0030513	0.99695	0.0061026	0.17073	FALSE
HGLibA_50508	TMEM72	44.673/23.675/85.813	20.342/0/0	44.954	0.48908	-4.9477	1061.2	1720.6	1.072	0.003057	0.99694	0.0061139	0.17101	FALSE
HGLibA_33154	NXPE2	60.918/123.95/44.623	4.8822/1.8181/0	69.594	0.88498	-5.2269	1826.6	2663.6	1.3313	0.0030594	0.99694	0.0061189	0.17111	FALSE
HGLibA_11081	CRCP	62.949/37.602/10.298	0/6.3632/0	29.029	0.30131	-4.5283	787.45	1111.1	0.86185	0.0030662	0.99693	0.0061325	0.17145	FALSE
HGLibB_12705	DDX46	52.796/38.995/42.049	0/0/19.743	44.238	0.48327	-4.9307	52.759	1693.2	1.0633	0.0030803	0.99692	0.0061607	0.17201	FALSE
HGLibB_07895	CCDC86	285.3/239.54/108.98	0/46.36/100.43	195.3	7.6589	-4.5027	8753.9	7474.9	2.1703	0.0030835	0.99692	0.006167	0.17213	FALSE
HGLibB_52152	TTLL9	70.056/119.77/17.163	34.175/0/0	52.457	0.59983	-5.0624	3043.2	2007.7	1.1573	0.0030854	0.99691	0.0061708	0.1722	FALSE
HGLibA_44654	SLC25A16	60.918/26.461/16.305	0/0/6.8672	29.746	0.31148	-4.5511	581.58	1138.5	0.87235	0.0030914	0.99691	0.0061828	0.17245	FALSE
HGLibB_52890	UHRF2	94.423/71.026/28.318	0/0/48.071	57.496	0.6839	-5.1184	1199	2200.6	1.2111	0.0031117	0.99689	0.0062234	0.1732	FALSE
HGLibB_48524	TBCC	13.199/18.105/68.651	4.8822/0/0	25.432	0.26796	-4.3817	1035.6	973.4	0.80657	0.0031122	0.99689	0.0062243	0.1732	FALSE
HGLibA_39978	RAB7A	243.67/345.38/361.27	41.498/19.999/41.203	312.12	32.464	-3.226	4103.9	11946	2.5586	0.0031136	0.99689	0.0062272	0.17324	FALSE
HGLibA_33270	ODAM	1.0153/50.136/55.779	0/0/1.7168	14.529	0.16289	-3.7392	1576	556.09	0.60922	0.0031242	0.99688	0.0062485	0.17363	FALSE
HGLibB_28339	MARS2	68.025/37.602/51.488	0/32.725/0	50.881	0.58982	-5.0283	235.31	1947.4	1.1396	0.0031571	0.99684	0.0063142	0.17498	FALSE
HGLibB_14979	EMC1	24.367/8.356/26.602	2.4411/0/0	17.578	0.19399	-3.9597	106.29	672.78	0.67021	0.0031658	0.99683	0.0063316	0.17533	FALSE
HGLibB_20498	GTF2A2	306.62/71.026/133.87	0/19.09/24.894	142.87	3.5333	-4.9881	16028	5468.4	1.8843	0.003172	0.99683	0.006344	0.17559	FALSE
HGLibA_19952	GPR158	35.535/32.031/23.17	7.3232/0/0	29.768	0.32027	-4.5425	40.964	1139.3	0.87241	0.0031766	0.99682	0.0063532	0.17581	FALSE
HGLibB_53057	UQCRH	56.857/6.9634/23.17	0/0/3.4336	20.976	0.22815	-4.1613	744.3	802.83	0.73224	0.0031796	0.99682	0.0063591	0.17593	FALSE
HGLibA_24609	KIAA0226L	62.949/130.91/28.318	0/66.359/0	61.587	0.77267	-5.1419	2957.2	2357.2	1.2526	0.0031955	0.9968	0.006391	0.1765	FALSE
HGLibA_39704	PYROXD1	30.459/100.27/43.765	0/0/34.336	51.142	0.60093	-5.0255	1448	1957.4	1.1424	0.0031957	0.9968	0.0063914	0.1765	FALSE
HGLibB_45587	SMC1A	40.612/52.922/91.82	0/0/54.08	58.226	0.71523	-5.1098	733.48	2228.5	1.2183	0.0031991	0.9968	0.0063982	0.1766	FALSE
HGLibA_18632	GARNL3	44.673/27.853/59.211	0/0/18.885	41.927	0.47474	-4.8634	252.17	1604.7	1.0348	0.0032274	0.99677	0.0064548	0.17779	FALSE
HGLibA_47006	SRP54	27.413/140.66/50.63	0/55.451/0	58.034	0.72205	-5.0993	3909.8	2221.2	1.216	0.0032448	0.99676	0.0064895	0.17863	FALSE
HGLibA_31909	NHP2	31.474/84.953/75.516	60.213/0/0	58.678	0.7449	-5.096	856.97	2245.8	1.2225	0.0032974	0.9967	0.0065949	0.18107	FALSE
HGLibB_12706	DDX46	50.765/20.89/53.204	0/0/15.451	38.365	0.43776	-4.775	339.67	1468.4	0.98976	0.0032993	0.9967	0.0065986	0.18113	FALSE
HGLibB_35843	PDIK1L	51.78/68.241/30.893	0/0/30.044	47.798	0.5705	-4.9575	359.78	1829.4	1.1042	0.0033074	0.99669	0.0066148	0.18137	FALSE
HGLibB_03294	ASH2L	277.18/313.35/402.46	71.605/46.36/18.027	326.97	39.133	-3.0307	4182.1	12514	2.573	0.0033124	0.99669	0.0066247	0.1816	FALSE
HGLibA_17506	FICD	86.3/59.885/0	0/0/0	7.9325	0	-3.1591	4451.8	303.61	0.45525	0.0033371	0.99666	0.0066742	0.18262	FALSE
HGLibB_36473	PIBF1	46.704/27.853/24.886	9.7643/0/0	31.874	0.36205	-4.5931	142.46	1220	0.90221	0.0033442	0.99666	0.0066883	0.18292	FALSE
HGLibB_20561	GTF3C4	388.86/456.8/242.85	61.841/17.271/109.88	350.72	48.995	-2.8146	12171	13423	2.6042	0.0033739	0.99663	0.0067477	0.18411	FALSE
HGLibA_07215	CAPZB	67.01/126.73/87.53	3.2548/0/12.018	90.589	1.496	-5.1975	935.87	3467.2	1.5131	0.0033739	0.99663	0.0067479	0.18411	FALSE
HGLibB_49913	TMEM145	1.0153/22.283/19.737	0/0/0	7.8115	0	-3.1394	198.91	298.98	0.45177	0.0033744	0.99663	0.0067489	0.18411	FALSE
HGLibA_08715	CDIPT	13.199/37.602/43.765	0/7.2722/0	27.918	0.31931	-4.4541	280.78	1068.5	0.84429	0.003382	0.99662	0.006764	0.1844	FALSE
HGLibB_42147	RPTN	39.597/29.246/48.055	0/16.362/0	38.181	0.44806	-4.758	89.671	1461.3	0.98706	0.003396	0.9966	0.006792	0.18487	FALSE
HGLibA_46537	SPATC1	24.367/32.031/37.758	0/0/9.4425	30.89	0.35697	-4.5547	45.509	1182.3	0.88799	0.0034081	0.99659	0.0068162	0.18527	FALSE
HGLibB_16248	FAM171B	69.04/22.283/56.637	0/0/26.611	44.346	0.54401	-4.8762	623.82	1697.3	1.0632	0.0034599	0.99654	0.0069197	0.18741	FALSE
HGLibB_28338	MARS2	125.9/149.02/167.34	164.37/0/4.292	146.42	4.0647	-4.8634	432.69	5604.3	1.9016	0.0034601	0.99654	0.0069201	0.18741	FALSE
HGLibA_23501	IQCF1	7.1071/20.89/60.069	4.0685/0/0	20.779	0.24673	-4.1267	865.32	795.31	0.72807	0.0034692	0.99653	0.0069383	0.18782	FALSE
HGLibA_61453	hsa-mir-501	262.96/172.69/114.13	0/58.178/42.062	173.06	6.1634	-4.6028	5777.5	6623.8	2.0507	0.0034724	0.99653	0.0069449	0.18785	FALSE
HGLibA_41710	RNGTT	178.69/143.45/135.59	0/38.179/24.035	151.47	4.4207	-4.8139	528.89	5797.5	1.9313	0.0034731	0.99653	0.0069463	0.18785	FALSE
HGLibB_13841	DPM3	199/68.241/126.15	0/25.453/7.7257	119.66	2.6143	-5.0611	4490.2	4580	1.7296	0.0034737	0.99653	0.0069473	0.18785	FALSE
HGLibB_29650	MOSPD3	280.22/182.44/154.46	0/129.99/58.372	199.14	9.0285	-4.3188	4424.6	7621.9	2.1776	0.0034835	0.99652	0.006967	0.18821	FALSE
HGLibB_54075	WDR61	292.41/320.31/416.19	7.3232/183.62/67.814	339.07	45.145	-2.8816	4238.8	12978	2.5801	0.0034853	0.99651	0.0069705	0.18827	FALSE
HGLibA_23688	IST1	80.209/11.141/32.609	0/9.9993/0	30.809	0.36569	-4.5417	1415.2	1179.2	0.88654	0.0035014	0.9965	0.0070029	0.18901	FALSE
HGLibB_03552	ATP11A	194.94/246.5/189.65	20.342/0.90903/55.796	208.88	10.386	-4.2042	989.9	7994.6	2.2199	0.0035024	0.9965	0.0070048	0.18902	FALSE
HGLibB_29897	MRPL27	28.428/36.209/34.325	0/11.817/0	32.815	0.39211	-4.6023	16.523	1256	0.91488	0.0035123	0.99649	0.0070247	0.18934	FALSE
HGLibA_36629	PIK3C3	487.34/479.08/306.35	21.97/160.9/152.8	415.1	81.496	-2.3345	10569	15888	2.6467	0.0035706	0.99643	0.0071412	0.19205	FALSE
HGLibB_42789	SCAMP3	0/27.853/138.16	0/0/0	7.1841	0	-3.0328	8816.7	274.97	0.43325	0.0035833	0.99642	0.0071666	0.19252	FALSE
HGLibA_53639	VGLL2	59.903/54.314/16.305	0/0/18.027	37.595	0.46594	-4.7185	615.23	1438.9	0.9788	0.0035951	0.9964	0.0071902	0.19298	FALSE
HGLibA_09728	CISD1	25.382/62.67/49.772	0/0/26.611	42.948	0.54401	-4.831	372.04	1643.8	1.0459	0.0035967	0.9964	0.0071935	0.19302	FALSE
HGLibA_58043	hsa-mir-191	268.04/231.18/176.78	0/151.81/140.78	222.09	12.787	-4.0163	2123.7	8500.3	2.2702	0.0036264	0.99637	0.0072528	0.19448	FALSE
HGLibA_58416	hsa-mir-29b-2	104.58/34.817/0	0/0/0	7.0498	0	-3.009	5166	269.82	0.42918	0.0036317	0.99637	0.0072633	0.19472	FALSE
HGLibB_30199	MSRB1	77.163/104.45/27.46	0/0/88.416	60.508	0.86015	-5.0473	1650.2	2315.9	1.2395	0.0036522	0.99635	0.0073043	0.19562	FALSE
HGLibB_47153	SSX4	914.78/571/410.19	340.94/184.53/114.17	598.39	192.95	-1.6278	68138	22903	2.679	0.0036536	0.99635	0.0073072	0.19562	FALSE
HGLibA_42123	RPS27	42.643/0/82.381	0/0/0	6.9643	0	-2.9936	3504.5	266.55	0.42657	0.0036632	0.99634	0.0073263	0.19595	FALSE
HGLibA_58007	hsa-mir-186	78.178/32.031/14.588	0/0/13.734	33.205	0.4172	-4.5931	1185.3	1270.9	0.91973	0.0036909	0.99631	0.0073819	0.19715	FALSE
HGLibB_34967	PAGE4	260.93/208.9/147.6	0/91.812/102.15	200.38	9.6952	-4.2349	3262.5	7669.4	2.1774	0.0037007	0.9963	0.0074014	0.19763	FALSE
HGLibA_07905	CCDC87	37.566/23.675/37.758	0/0/12.876	32.265	0.40627	-4.5641	66.026	1234.9	0.90659	0.0037063	0.99629	0.0074127	0.19775	FALSE
HGLibA_54161	WDR7	268.04/161.55/283.18	4.0685/43.633/17.168	230.6	14.556	-3.8961	4467.3	8826.1	2.2997	0.0037078	0.99629	0.0074155	0.19778	FALSE
HGLibA_41992	RPL7	37.566/33.424/36.9	0/0/17.168	35.917	0.45686	-4.6633	4.9499	1374.7	0.95639	0.0037104	0.99629	0.0074208	0.19788	FALSE
HGLibA_09102	CEP120	200.01/256.25/157.04	0/100.9/94.425	200.41	9.7467	-4.2282	2499.8	7670.4	2.177	0.0037213	0.99628	0.0074426	0.19833	FALSE
HGLibA_45256	SLC5A10	161.43/238.15/177.63	0/64.541/96.141	189.72	8.4367	-4.3371	1645.7	7261.5	2.1274	0.0037484	0.99625	0.0074968	0.19937	FALSE
HGLibB_28448	MBD5	40.612/47.351/20.595	0/0/15.451	34.094	0.43776	-4.6093	200.23	1304.9	0.93169	0.0037645	0.99624	0.007529	0.20014	FALSE
HGLibB_37377	PNPLA8	91.377/25.068/13.73	0/12.726/0	31.595	0.40431	-4.5367	1967.8	1209.3	0.89695	0.0037716	0.99623	0.0075433	0.20043	FALSE
HGLibB_42838	SCEL	115.74/26.461/0	0/0/0	6.6511	0	-2.9357	6169	254.56	0.41686	0.003784	0.99622	0.007568	0.20095	FALSE
HGLibB_42008	RPS10-NUDT3	45.688/52.922/24.028	0/0/22.319	38.737	0.50749	-4.7203	232.95	1482.6	0.99284	0.0037861	0.99621	0.0075722	0.20102	FALSE
HGLibB_17466	FHL5	73.102/57.1/24.028	0/39.088/0	46.474	0.63179	-4.8626	662.88	1778.7	1.0869	0.003797	0.9962	0.0075939	0.20148	FALSE
HGLibA_22096	HRH2	105.59/68.241/8.5813	0/0/24.035	39.628	0.52261	-4.7379	3066.8	1516.7	1.0041	0.0037985	0.9962	0.0075971	0.20148	FALSE
HGLibB_47847	SWT1	108.64/54.314/10.298	23.597/0/0	39.377	0.51882	-4.7325	2932.9	1507.1	1.0009	0.0037988	0.9962	0.0075975	0.20148	FALSE
HGLibA_49664	TLR8	16.245/36.209/48.055	0/11.817/0	30.474	0.39211	-4.4988	272.24	1166.4	0.88082	0.0037989	0.9962	0.0075979	0.20148	FALSE
HGLibA_57284	hsa-mir-1207	44.673/66.848/0	0/0/0	6.5925	0	-2.9246	2562.2	252.32	0.41502	0.0038075	0.99619	0.0076151	0.20189	FALSE
HGLibA_31867	NGDN	21.321/41.78/40.332	0/0/14.593	33.002	0.42768	-4.5739	133.61	1263.1	0.91655	0.0038093	0.99619	0.0076186	0.20194	FALSE
HGLibA_19290	GLOD5	855.9/568.21/834.96	214/340.88/339.07	740.51	291.37	-1.3427	25961	28343	2.6679	0.0038109	0.99619	0.0076219	0.20198	FALSE
HGLibA_24605	KIAA0226	95.438/86.346/6.0069	0/0/19.743	36.847	0.48327	-4.6733	3417.1	1410.3	0.96831	0.0038153	0.99618	0.0076307	0.20217	FALSE
HGLibB_41309	RLTPR	41.627/26.461/42.907	0/0/18.885	36.158	0.47474	-4.6551	84.748	1383.9	0.9592	0.0038278	0.99617	0.0076556	0.20274	FALSE
HGLibB_42013	RPS11	174.63/169.91/194.8	0/73.631/57.513	179.46	7.4172	-4.4222	174.9	6868.7	2.0759	0.0038312	0.99617	0.0076625	0.20277	FALSE
HGLibA_04934	BTF3	0/62.67/59.211	0/0.90903/0	7.0939	0.11609	-2.8584	2927.6	271.51	0.42347	0.0038491	0.99615	0.0076982	0.20335	FALSE
HGLibA_40247	RAPGEF2	19.291/29.246/22.311	6.5095/0/0	23.264	0.30432	-4.2174	26.241	890.39	0.76943	0.0038536	0.99615	0.0077072	0.20348	FALSE
HGLibB_22668	IFNAR2	0/89.131/31.751	0/0/0	6.4748	0	-2.902	3756.4	247.82	0.4113	0.0038559	0.99614	0.0077117	0.2035	FALSE
HGLibA_47771	SUMF1	40.612/16.712/84.097	0/0/23.177	38.526	0.51514	-4.7053	1278.5	1474.5	0.98987	0.0038678	0.99613	0.0077355	0.20372	FALSE
HGLibB_43082	SDHAF1	43.658/22.283/13.73	0/0/6.8672	23.738	0.31148	-4.2374	249.54	908.54	0.7772	0.0038695	0.99613	0.0077391	0.20377	FALSE
HGLibA_24578	KHNYN	73.102/26.461/54.921	0/0/43.779	47.371	0.65989	-4.865	578.15	1813.1	1.097	0.0038735	0.99613	0.0077471	0.20388	FALSE
HGLibA_42247	RRH	51.78/52.922/0	0/0/0	6.4036	0	-2.8882	2132	245.09	0.40903	0.0038857	0.99611	0.0077715	0.20429	FALSE
HGLibA_30340	MTERFD1	60.918/20.89/52.346	0/27.271/0	40.55	0.54928	-4.7452	470.26	1552	1.0154	0.0038881	0.99611	0.0077761	0.20434	FALSE
HGLibA_45975	SNRPD1	72.086/26.461/47.197	0/37.27/0	44.827	0.62029	-4.8219	543	1715.7	1.0673	0.0038972	0.9961	0.0077943	0.20478	FALSE
HGLibA_11852	CXCL12	35.535/0/75.516	0/0/0	6.359	0	-2.8795	2837.2	243.38	0.40761	0.0039047	0.9961	0.0078094	0.20511	FALSE
HGLibA_51847	TSGA10	24.367/33.424/49.772	0/17.271/0	34.356	0.45797	-4.5999	169.14	1314.9	0.93481	0.0039065	0.99609	0.0078129	0.20511	FALSE
HGLibA_03153	ARSJ	38.581/41.78/20.595	0/0/14.593	32.145	0.42768	-4.537	133.83	1230.3	0.90425	0.0039183	0.99608	0.0078367	0.20562	FALSE
HGLibB_11607	CTF1	170.57/61.278/227.41	22.783/0/24.035	133.47	3.7082	-4.836	7705.8	5108.6	1.8156	0.0039203	0.99608	0.0078406	0.20568	FALSE
HGLibB_39056	PSMB3	26.398/83.56/60.069	0/58.178/0	50.994	0.73528	-4.9051	873.95	1951.7	1.1376	0.0039318	0.99607	0.0078636	0.20614	FALSE
HGLibB_04936	BTF3L4	33.505/36.209/40.332	0/20.908/0	36.576	0.49446	-4.6521	11.838	1399.9	0.96435	0.0039368	0.99606	0.0078736	0.20631	FALSE
HGLibB_20553	GTF3C1	109.65/115.59/101.26	0/8.1812/19.743	108.67	2.4424	-4.9937	51.892	4159.4	1.6472	0.0039529	0.99605	0.0079057	0.20702	FALSE
HGLibA_31676	NELFCD	83.255/37.602/9.4395	0/13.635/0	30.965	0.41596	-4.4966	1620.8	1185.2	0.88738	0.0039642	0.99604	0.0079285	0.20748	FALSE
HGLibB_32610	NRBP1	90.362/80.775/172.48	0/36.361/4.292	107.98	2.4206	-4.9937	2605.6	4133	1.642	0.0039668	0.99603	0.0079335	0.20753	FALSE
HGLibA_20672	GUK1	144.17/41.78/88.388	0.81369/0/42.062	81.063	1.4676	-5.0555	2789.8	3102.6	1.429	0.0040075	0.99599	0.008015	0.20919	FALSE
HGLibA_21386	HIST1H2AE	37.566/0/63.502	0/0/0	6.1107	0	-2.83	2160.3	233.88	0.39957	0.0040142	0.99599	0.0080284	0.20945	FALSE
HGLibB_37551	POLR2K	43.658/27.853/90.104	0/0/49.788	47.863	0.6931	-4.851	1101.2	1831.9	1.1021	0.0040176	0.99598	0.0080353	0.20955	FALSE
HGLibA_06123	C2orf40	52.796/34.817/15.446	0/0/13.734	30.522	0.4172	-4.4752	370.92	1168.2	0.88079	0.0040367	0.99596	0.0080734	0.21037	FALSE
HGLibA_01386	AK4	57.872/44.566/33.467	0/39.088/0	44.196	0.63179	-4.7917	151.14	1691.6	1.0592	0.0040393	0.99596	0.0080786	0.2104	FALSE
HGLibB_02680	ARFRP1	83.255/115.59/119.28	17.088/8.1812/0	104.71	2.3235	-4.9912	395.54	4007.5	1.6173	0.0040416	0.99596	0.0080832	0.21043	FALSE
HGLibB_42771	SCAF11	40.612/73.812/28.318	0/0/38.628	43.957	0.62891	-4.7866	573.53	1682.4	1.0563	0.0040475	0.99595	0.008095	0.21059	FALSE
HGLibB_00653	ACTR1B	25.382/86.346/0	0/0/0	5.9394	0	-2.7948	3439.2	227.33	0.39393	0.0040938	0.99591	0.0081876	0.21268	FALSE
HGLibB_51784	TSGA10IP	140.11/111.41/54.062	2.4411/0/34.336	94.51	1.9607	-5.0116	2000.6	3617.3	1.5388	0.0041209	0.99588	0.0082418	0.2138	FALSE
HGLibB_04945	BTG3	39.597/16.712/23.17	8.9506/0/0	24.849	0.34898	-4.2602	143.26	951.08	0.79444	0.0041502	0.99585	0.0083005	0.21509	FALSE
HGLibA_05055	C10orf131	24.367/25.068/20.595	0/0/7.7257	23.258	0.32773	-4.1914	5.7986	890.18	0.76855	0.0041523	0.99585	0.0083047	0.21516	FALSE
HGLibB_47764	SUPT5H	44.673/45.958/0	0/0/0	5.808	0	-2.7672	1578.1	222.3	0.38955	0.0041573	0.99584	0.0083145	0.21522	FALSE
HGLibA_47111	SSB	58.887/11.141/44.623	0/15.453/0	30.853	0.43779	-4.4695	682.04	1180.9	0.8851	0.0041894	0.99581	0.0083788	0.21645	FALSE
HGLibB_22481	ICMT	312.71/86.346/223.11	89.506/0/67.814	181.97	8.3742	-4.2868	13965	6964.9	2.0801	0.0042069	0.99579	0.0084139	0.21709	FALSE
HGLibA_41871	RPL13A	7.1071/29.246/22.311	4.0685/0/0	16.698	0.24673	-3.8274	140.47	639.1	0.65075	0.0042124	0.99579	0.0084249	0.21733	FALSE
HGLibA_17820	FOXB2	103.56/15.319/38.616	0/0/30.903	39.454	0.57681	-4.6812	2346.4	1510.1	1.0005	0.0042169	0.99578	0.0084339	0.21751	FALSE
HGLibA_30107	MRPS6	117.77/59.885/6.0069	0/22.726/0	34.983	0.51114	-4.5736	4157.1	1338.9	0.94207	0.0042772	0.99572	0.0085544	0.22024	FALSE
HGLibA_21117	HELQ	63.964/0/28.318	0/0/0	5.5677	0	-2.7154	1979.4	213.1	0.3814	0.0042792	0.99572	0.0085584	0.2203	FALSE
HGLibA_36081	PEX10	70.056/0/25.744	0/0/0	5.5599	0	-2.7137	2299	212.8	0.38114	0.0042833	0.99572	0.0085666	0.22041	FALSE
HGLibA_47324	STAG2	39.597/43.173/35.183	0/0/31.761	39.181	0.583	-4.6658	16.044	1499.6	0.99672	0.0042969	0.9957	0.0085939	0.22097	FALSE
HGLibA_31495	NDUFAF5	27.413/32.031/26.602	0/13.635/0	28.586	0.41596	-4.3851	8.5913	1094.1	0.85165	0.0043064	0.99569	0.0086129	0.22132	FALSE
HGLibA_39980	RAB7A	164.48/115.59/243.71	0/37.27/93.566	166.72	6.9475	-4.3994	4273.3	6381	2.0001	0.0043848	0.99562	0.0087696	0.22467	FALSE
HGLibA_35588	PCF11	90.362/146.23/118.42	0/7.2722/43.779	116.1	3.0863	-4.8408	787.87	4443.6	1.6954	0.004399	0.9956	0.0087979	0.2252	FALSE
HGLibB_51159	TRA2A	46.704/38.995/29.177	0/0/30.044	37.597	0.5705	-4.6192	77.896	1439	0.97608	0.0044076	0.99559	0.0088152	0.22559	FALSE
HGLibA_15760	EXOC7	539.12/558.46/320.94	112.29/139.08/96.141	458.89	114.51	-1.9933	17691	17563	2.5985	0.0044148	0.99559	0.0088295	0.22586	FALSE
HGLibB_45280	SLC6A6	109.65/121.16/56.637	0/9.0903/9.4425	90.962	1.9622	-4.9563	1219.8	3481.5	1.5084	0.0044198	0.99558	0.0088397	0.22607	FALSE
HGLibB_09145	CEP63	55.841/50.136/43.765	0/0/72.964	49.669	0.80068	-4.8145	36.589	1901	1.1208	0.0044335	0.99557	0.008867	0.22668	FALSE
HGLibB_20506	GTF2E2	22.337/43.173/12.872	8.9506/0/0	23.166	0.34898	-4.1631	253.46	886.67	0.76627	0.0044394	0.99556	0.0088787	0.22693	FALSE
HGLibB_47174	ST20	94.423/23.675/18.879	0/0/24.894	34.839	0.52991	-4.55	1964.8	1333.4	0.93956	0.0044555	0.99554	0.008911	0.22751	FALSE
HGLibA_06661	C9orf114	186.82/111.41/98.685	0/37.27/15.451	127.12	3.7734	-4.7463	2309.4	4865.4	1.7683	0.0044602	0.99554	0.0089204	0.2277	FALSE
HGLibA_25620	KRTAP10-8	88.331/37.602/15.446	0/0/30.044	37.185	0.5705	-4.6037	1544.3	1423.2	0.97055	0.0044629	0.99554	0.0089259	0.22776	FALSE
HGLibB_09397	CHD7	337.08/509.72/423.06	144.02/54.542/97	417.34	91.345	-2.1796	7504.1	15973	2.5794	0.0044714	0.99553	0.0089428	0.22808	FALSE
HGLibA_56951	ZP1	86.3/0/17.163	0/0/0	5.2032	0	-2.633	3373.4	199.15	0.36871	0.0044803	0.99552	0.0089605	0.22848	FALSE
HGLibB_56444	ZNF675	59.903/33.424/8.5813	0/11.817/0	25.844	0.39211	-4.2693	757.72	989.16	0.80926	0.0044899	0.99551	0.0089799	0.22893	FALSE
HGLibB_37021	PLEKHA3	96.453/125.34/42.049	0/0.90903/49.788	79.821	1.6138	-4.9505	1887.7	3055.1	1.4149	0.0045297	0.99547	0.0090594	0.23046	FALSE
HGLibA_40172	RALGPS2	138.08/4.178/44.623	0/17.271/0	29.69	0.45797	-4.3957	6311.2	1136.4	0.86717	0.0045628	0.99544	0.0091256	0.23197	FALSE
HGLibA_28927	METAP1	78.178/36.209/36.9	65.909/0/0	47.101	0.7707	-4.7637	594.24	1802.8	1.0912	0.0045631	0.99544	0.0091261	0.23197	FALSE
HGLibA_32204	NMT1	54.826/0/28.318	0/0/0.85841	5.2843	0.11241	-2.498	1506.4	202.25	0.36366	0.0045704	0.99543	0.0091407	0.23223	FALSE
HGLibB_21802	HNRNPK	37.566/37.602/93.537	0.81369/0/9.4425	50.941	0.85533	-4.8071	1085.6	1949.7	1.1343	0.004587	0.99541	0.009174	0.23298	FALSE
HGLibB_56848	ZNF98	27.413/33.424/15.446	0/10.908/0	24.195	0.37926	-4.1911	86.037	926.02	0.78261	0.0046302	0.99537	0.0092603	0.23467	FALSE
HGLibB_50157	TMEM214	73.102/2.7853/35.183	0/0/6.8672	19.433	0.31148	-3.9616	1702.8	743.77	0.70113	0.0046582	0.99534	0.0093164	0.23564	FALSE
HGLibA_29124	MGA	0/72.419/17.163	0/0/0	4.9025	0	-2.5613	2366.4	187.64	0.3579	0.004663	0.99534	0.0093261	0.23579	FALSE
HGLibA_11484	CSTF1	131.99/149.02/92.678	28.479/0/18.027	122.16	3.6278	-4.734	843.52	4675.5	1.7335	0.0046719	0.99533	0.0093437	0.23614	FALSE
HGLibB_10645	COMMD2	948.29/974.87/754.3	319.78/429.97/494.44	886.77	408.13	-1.1176	14547	33940	2.598	0.0046871	0.99531	0.0093742	0.2368	FALSE
HGLibA_12526	DCPS	649.79/266/249.72	50.449/73.631/55.796	350.79	59.181	-2.5473	53404	13426	2.5167	0.0046962	0.9953	0.0093924	0.23706	FALSE
HGLibA_52932	UGT3A1	0/86.346/13.73	0/0/0	4.8263	0	-2.5426	3374	184.72	0.3551	0.0047121	0.99529	0.0094241	0.23777	FALSE
HGLibA_08955	CEBPA	97.469/133.7/26.602	0/9.0903/3.4336	70.277	1.3809	-4.9039	3334.4	2689.8	1.3284	0.0047332	0.99527	0.0094663	0.23858	FALSE
HGLibA_46530	SPATA8	99.499/250.68/202.52	0/92.721/57.513	171.59	8.0169	-4.2586	6204.6	6567.4	2.0184	0.0047395	0.99526	0.0094791	0.23878	FALSE
HGLibB_17514	FIS1	127.93/231.18/107.27	0/49.996/35.195	146.94	5.5127	-4.5056	4516.2	5624	1.8859	0.0047407	0.99526	0.0094813	0.23878	FALSE
HGLibB_38432	PRIM1	27.413/0/41.19	0/0/0	4.7432	0	-2.5218	932.41	181.54	0.35203	0.004767	0.99523	0.0095339	0.23983	FALSE
HGLibA_52491	U2AF1	9.1377/12.534/0.85813	0/0/0	4.7177	0	-2.5154	47.764	180.57	0.35109	0.004784	0.99522	0.0095681	0.24038	FALSE
HGLibA_20898	HAVCR1	426.43/472.12/321.8	96.829/147.26/43.779	401.63	85.479	-2.219	5977.9	15372	2.5499	0.0047909	0.99521	0.0095818	0.24054	FALSE
HGLibA_51090	TP53TG5	16.245/43.173/36.042	0/19.09/0	29.358	0.4768	-4.3615	203.74	1123.6	0.86159	0.0048071	0.99519	0.0096141	0.24123	FALSE
HGLibB_01456	AKIRIN1	122.85/112.81/74.658	0/8.1812/23.177	101.14	2.5813	-4.834	654.37	3871.2	1.5841	0.0048171	0.99518	0.0096341	0.24155	FALSE
HGLibA_21847	HNRNPU	77.163/147.62/108.98	0/18.181/14.593	107.48	2.8948	-4.7997	1266.5	4113.6	1.6306	0.0048181	0.99518	0.0096361	0.24155	FALSE
HGLibB_30504	MUC4	6.0918/37.602/10.298	0/3.6361/0	13.339	0.2343	-3.5382	325.23	510.54	0.57998	0.0048246	0.99518	0.0096492	0.24166	FALSE
HGLibA_41893	RPL19	63.964/32.031/12.872	0/19.999/0	29.789	0.48576	-4.3732	729.56	1140.2	0.86784	0.0048247	0.99518	0.0096495	0.24166	FALSE
HGLibA_45444	SLCO1A2	119.81/110.02/108.98	0/13.635/25.752	112.83	3.1868	-4.7649	35.671	4318.6	1.6685	0.0048257	0.99517	0.0096514	0.24166	FALSE
HGLibB_41476	RNF144B	106.61/13.927/121	0/0/146.79	56.493	1.0367	-4.819	4242	2162.2	1.1926	0.0048547	0.99515	0.0097095	0.24281	FALSE
HGLibB_23383	INTS2	572.63/777.11/620.43	203.42/259.07/272.97	651.15	243.21	-1.4171	11488	24922	2.5841	0.0048635	0.99514	0.009727	0.24315	FALSE
HGLibB_49118	TFG	60.918/23.675/22.311	0/24.544/0	31.817	0.52695	-4.4257	501.76	1217.8	0.89665	0.0048872	0.99511	0.0097743	0.24407	FALSE
HGLibA_36294	PGS1	168.54/125.34/100.4	0/30.907/25.752	128.48	4.2117	-4.6349	1201.5	4917.6	1.7721	0.0048883	0.99511	0.0097767	0.24408	FALSE
HGLibA_09049	CENPC1	37.566/58.492/18.021	0/0/30.044	34.097	0.5705	-4.4821	432.8	1305	0.92807	0.0049139	0.99509	0.0098278	0.24506	FALSE
HGLibB_15690	EWSR1	310.68/115.59/130.44	0/81.812/60.088	167.33	7.7999	-4.2577	12294	6404.3	1.9934	0.0049285	0.99507	0.009857	0.24552	FALSE
HGLibA_25121	KLHL1	131.99/26.461/38.616	0/0/109.02	51.304	0.92951	-4.7606	3644.1	1963.6	1.1368	0.0049437	0.99506	0.0098874	0.24613	FALSE
HGLibA_53812	VPS54	197.98/153.19/134.73	0/92.721/38.628	159.87	7.0103	-4.3279	1064.7	6119	1.9542	0.0049548	0.99505	0.0099096	0.24654	FALSE
HGLibA_01779	AMER3	36.551/25.068/0	0/0/0	4.4183	0	-2.4378	739.21	169.11	0.33976	0.0049962	0.995	0.0099924	0.24807	FALSE
HGLibA_60467	hsa-mir-4509-2	17.26/22.283/41.19	0/0/14.593	25.122	0.42768	-4.1935	164.03	961.5	0.79637	0.0050376	0.99496	0.010075	0.24971	FALSE
HGLibB_40242	RARS2	22.337/34.817/30.893	0/0/20.602	28.857	0.49156	-4.3232	41.09	1104.5	0.85351	0.0050453	0.99495	0.010091	0.24989	FALSE
HGLibA_60678	hsa-mir-4644	47.719/0/18.021	0/0/0	4.3251	0	-2.4128	1044.7	165.54	0.33616	0.0050668	0.99493	0.010134	0.25063	FALSE
HGLibA_26519	LILRB5	32.49/26.461/0	0/0/0	4.3236	0	-2.4124	651.04	165.48	0.3361	0.005068	0.99493	0.010136	0.25064	FALSE
HGLibB_53694	VPS29	373.63/454.01/314.08	134.26/33.634/90.991	376.28	74.362	-2.3237	4959.1	14402	2.5158	0.0050839	0.99492	0.010168	0.2512	FALSE
HGLibB_08208	CCT8	157.37/197.76/161.33	0/104.54/60.947	171.24	8.5123	-4.1784	496.94	6553.9	2.01	0.0050944	0.99491	0.010189	0.25163	FALSE
HGLibA_61795	hsa-mir-526a-2	81.224/25.068/46.339	0/0/78.973	45.537	0.82472	-4.6726	846.59	1742.9	1.071	0.0050959	0.9949	0.010192	0.25166	FALSE
HGLibA_60923	hsa-mir-4706	80.209/36.209/17.163	0/41.815/0	36.823	0.64838	-4.5201	1134.6	1409.4	0.96359	0.0051336	0.99487	0.010267	0.25326	FALSE
HGLibA_23479	IPO9	105.59/137.87/155.32	0/29.089/36.053	131.26	4.6256	-4.5552	640.83	5023.7	1.7866	0.0051429	0.99486	0.010286	0.25361	FALSE
HGLibB_18150	FUS	25.382/55.707/15.446	0/19.999/0	27.966	0.48576	-4.2851	466.48	1070.4	0.83996	0.0051471	0.99485	0.010294	0.25377	FALSE
HGLibA_31902	NHLRC3	35.535/0/22.311	0/0/0	4.2064	0	-2.3803	663.5	161	0.33152	0.00516	0.99484	0.01032	0.2543	FALSE
HGLibA_20168	GPT2	52.796/52.922/86.671	0/26.362/0.85841	62.333	1.2637	-4.8062	385.95	2385.7	1.2503	0.0051696	0.99483	0.010339	0.25456	FALSE
HGLibA_57339	hsa-mir-1237	184.78/90.524/108.98	0/15.453/44.637	122.16	4.0131	-4.6187	2548.1	4675.7	1.7279	0.0051934	0.99481	0.010387	0.25563	FALSE
HGLibA_25643	KRTAP13-1	46.704/0/16.305	0/0/0	4.1503	0	-2.3646	987.88	158.85	0.32929	0.0052056	0.99479	0.010411	0.25607	FALSE
HGLibA_33028	NUP155	139.1/37.602/142.45	6.5095/0/20.602	90.679	2.2918	-4.7996	3920.8	3470.7	1.5003	0.0052133	0.99479	0.010427	0.25629	FALSE
HGLibA_02220	ANXA1	5.0765/12.534/14.588	0/0/2.5752	9.767	0.19908	-3.1666	26.451	373.82	0.49486	0.0052289	0.99477	0.010458	0.2569	FALSE
HGLibB_55425	ZNF143	62.949/25.068/24.886	34.989/0/0	33.999	0.60533	-4.4464	500.44	1301.3	0.92572	0.0052326	0.99477	0.010465	0.25703	FALSE
HGLibA_56911	ZNF93	300.53/112.81/114.13	0/76.358/48.071	157	7.0681	-4.2916	12196	6009.1	1.9342	0.0052427	0.99476	0.010485	0.25737	FALSE
HGLibB_55605	ZNF253	45.688/5.5707/42.049	0/0/12.018	22.102	0.39485	-4.0498	613.74	845.93	0.74634	0.0052535	0.99475	0.010507	0.25779	FALSE
HGLibB_02350	AP5B1	0/44.566/16.305	0/0/0	4.0845	0	-2.3461	902.36	156.33	0.32668	0.0052601	0.99474	0.01052	0.25806	FALSE
HGLibA_03107	ARRB1	80.209/133.7/78.09	7.3232/0/23.177	94.26	2.4853	-4.7725	1007.1	3607.7	1.5279	0.0052847	0.99472	0.010569	0.25879	FALSE
HGLibB_10155	CLUL1	52.796/8.356/72.083	30.107/0/0	31.743	0.57097	-4.3814	1308.8	1214.9	0.8943	0.0053115	0.99469	0.010623	0.25984	FALSE
HGLibB_44791	SLC29A2	44.673/61.278/8.5813	0/0/23.177	28.688	0.51514	-4.2923	860.96	1098	0.85021	0.0053209	0.99468	0.010642	0.26024	FALSE
HGLibA_09265	CFHR2	156.36/108.63/95.253	0/8.1812/71.248	117.4	3.7949	-4.626	1042.5	4493.2	1.6947	0.0053328	0.99467	0.010666	0.26061	FALSE
HGLibA_08004	CCL24	0/13.927/48.914	0/0/0	3.9966	0	-2.3209	1066.1	152.97	0.32314	0.0053351	0.99466	0.01067	0.26067	FALSE
HGLibB_13425	DMTF1	80.209/8.356/13.73	0/0/11.159	20.999	0.38288	-3.9917	1859.3	803.7	0.72719	0.0053412	0.99466	0.010682	0.26092	FALSE
HGLibB_51242	TRAPPC12	22.337/27.853/30.893	0/0/19.743	26.788	0.48327	-4.2276	18.9	1025.3	0.8215	0.005347	0.99465	0.010694	0.26111	FALSE
HGLibB_16783	FAM96B	33.505/16.712/55.779	0/0/30.044	31.505	0.5705	-4.3714	406.02	1205.8	0.89084	0.0053496	0.99465	0.010699	0.26111	FALSE
HGLibB_43196	SEC61A2	16.245/26.461/40.332	0/18.181/0	25.889	0.46754	-4.1955	150.97	990.86	0.80758	0.0053499	0.99465	0.0107	0.26111	FALSE
HGLibB_26201	LDLR	163.46/41.78/82.381	0/26.362/3.4336	82.57	2.0067	-4.7967	4103.8	3160.3	1.4331	0.0053503	0.99465	0.010701	0.26111	FALSE
HGLibB_08883	CDT1	42.643/0/15.446	0/0/0	3.9504	0	-2.3075	822.42	151.2	0.32127	0.0053756	0.99462	0.010751	0.262	FALSE
HGLibA_00055	AAMP	30.459/16.712/23.17	0/13.635/0	22.766	0.41596	-4.069	47.998	871.33	0.75714	0.0053842	0.99462	0.010768	0.2622	FALSE
HGLibB_35278	PAXIP1	26.398/12.534/32.609	0/0/12.876	22.106	0.40627	-4.0383	110.18	846.09	0.74602	0.0054053	0.99459	0.010811	0.2629	FALSE
HGLibB_09668	CIAO1	251.79/111.41/121.85	0/59.087/50.646	150.65	6.5969	-4.3192	6299.5	5765.9	1.8971	0.0054064	0.99459	0.010813	0.2629	FALSE
HGLibB_16473	FAM218A	108.64/40.387/6.0069	26.852/0/0	29.858	0.54595	-4.3191	3443	1142.8	0.86708	0.0054139	0.99459	0.010828	0.26312	FALSE
HGLibA_22255	HSP90B1	42.643/135.09/108.12	4.0685/27.271/0	85.415	2.1512	-4.7773	2406.4	3269.2	1.4563	0.0054242	0.99458	0.010848	0.26349	FALSE
HGLibB_39394	PTPN18	41.627/23.675/13.73	0/15.453/0	23.84	0.43779	-4.1107	209.31	912.46	0.77473	0.0054251	0.99457	0.01085	0.26349	FALSE
HGLibA_23905	JAG1	208.14/146.23/224.83	216.44/0/76.398	189.85	11.732	-3.9059	1730.3	7266.5	2.0896	0.0054319	0.99457	0.010864	0.26367	FALSE
HGLibA_08166	CCR7	18.275/0/34.325	0/0/0	3.8845	0	-2.2882	574.42	148.67	0.31858	0.0054345	0.99457	0.010869	0.2637	FALSE
HGLibB_19650	GORASP1	84.27/59.885/10.298	0/0/50.646	37.373	0.69763	-4.4985	1719.6	1430.4	0.96972	0.0054353	0.99456	0.010871	0.2637	FALSE
HGLibA_40194	RANBP10	32.49/0/18.879	0/0/0	3.8547	0	-2.2794	530.27	147.54	0.31735	0.0054616	0.99454	0.010923	0.26474	FALSE
HGLibB_14423	EDC4	16.245/0/36.9	0/0/0	3.8252	0	-2.2706	631.4	146.41	0.31614	0.0054888	0.99451	0.010978	0.26579	FALSE
HGLibB_18906	GET4	52.796/98.88/88.388	10.578/0/6.8672	77.278	1.8522	-4.7785	594.73	2957.7	1.3869	0.0054986	0.9945	0.010997	0.26614	FALSE
HGLibB_56840	ZNF92	18.275/59.885/2.5744	0/5.4542/0	14.238	0.28154	-3.5718	1118	544.96	0.59787	0.0054994	0.9945	0.010999	0.26614	FALSE
HGLibB_18147	FURIN	164.48/133.7/199.95	0/51.814/109.88	163.83	8.1959	-4.1638	1106.4	6270.3	1.9654	0.0055127	0.99449	0.011025	0.26667	FALSE
HGLibA_12775	DECR1	51.78/0/11.156	0/0/0	3.7796	0	-2.2569	1186.4	144.66	0.31425	0.0055314	0.99447	0.011063	0.26742	FALSE
HGLibA_10839	COX5B	18.275/9.7487/31.751	0/0/8.5841	17.83	0.34283	-3.8097	129.65	682.42	0.66941	0.0055362	0.99446	0.011072	0.26754	FALSE
HGLibA_08868	CDR2L	41.627/27.853/16.305	0/0/21.46	26.647	0.49963	-4.2044	166.42	1019.9	0.81875	0.0055582	0.99444	0.011116	0.26844	FALSE
HGLibA_26238	LDLR	341.14/236.75/158.75	13.833/34.543/19.743	234.06	21.137	-3.4085	8572.2	8958.5	2.2496	0.0055736	0.99443	0.011147	0.26902	FALSE
HGLibB_05264	C12orf56	20.306/0/27.46	0/0/0	3.7313	0	-2.2422	425.85	142.81	0.31223	0.0055775	0.99442	0.011155	0.26909	FALSE
HGLibA_18911	GEMIN2	82.239/77.99/116.71	0/13.635/12.018	90.798	2.4532	-4.7325	454.27	3475.2	1.4986	0.005579	0.99442	0.011158	0.26909	FALSE
HGLibB_03002	ARMC1	34.52/57.1/54.921	0/1.8181/6.0088	47.662	0.95424	-4.6381	157.23	1824.2	1.0936	0.0055796	0.99442	0.011159	0.26909	FALSE
HGLibA_38896	PRRX2	0/26.461/24.028	0/0/0.85841	3.9018	0.11241	-2.1396	464.59	149.34	0.31009	0.0055859	0.99441	0.011172	0.26926	FALSE
HGLibA_18600	GAMT	59.903/12.534/21.453	0/19.09/0	25.275	0.4768	-4.1532	688	967.38	0.7973	0.0055863	0.99441	0.011173	0.26926	FALSE
HGLibB_03293	ASH2L	296.47/185.23/169.91	19.529/9.0903/22.319	210.53	15.832	-3.6515	4837.8	8057.7	2.1689	0.0055913	0.99441	0.011183	0.26944	FALSE
HGLibB_45452	SLIT1	386.83/377.41/304.64	50.449/74.54/78.973	354.3	66.72	-2.3914	2029.4	13561	2.4696	0.0055971	0.9944	0.011194	0.26967	FALSE
HGLibB_43636	SF1	79.193/40.387/0	0/0/1.7168	6.7473	0.16289	-2.736	3212.8	258.25	0.40973	0.0055988	0.9944	0.011198	0.26969	FALSE
HGLibB_25707	KRTAP3-2	109.65/139.27/113.27	0/17.271/44.637	120.04	4.1674	-4.5499	261.68	4594.5	1.7095	0.0056122	0.99439	0.011224	0.27007	FALSE
HGLibA_05127	C11orf30	202.04/150.41/92.678	0/119.08/18.027	141.23	5.9003	-4.3654	3070	5405.3	1.8407	0.0056183	0.99438	0.011237	0.27025	FALSE
HGLibA_36043	PELO	85.285/54.314/35.183	0/3.6361/5.1504	54.63	1.1518	-4.6922	659.01	2090.9	1.1695	0.0056531	0.99435	0.011306	0.2716	FALSE
HGLibA_46884	SPTBN2	195.95/150.41/87.53	0/48.178/37.77	137.16	5.5756	-4.393	3047.8	5249.5	1.8161	0.0056681	0.99433	0.011336	0.27226	FALSE
HGLibA_53472	UVRAG	32.49/129.52/81.523	52.076/0.90903/0	70.022	1.6396	-4.7498	2540.4	2680	1.3209	0.0056707	0.99433	0.011341	0.27233	FALSE
HGLibA_02986	ARL6IP1	0/33.424/15.446	0/0/0	3.6353	0	-2.2127	520.04	139.14	0.30819	0.0056718	0.99433	0.011344	0.27233	FALSE
HGLibA_55373	ZMAT3	20.306/32.031/12.872	0/0/12.018	20.313	0.39485	-3.9335	96.347	777.45	0.71434	0.0056791	0.99432	0.011358	0.27252	FALSE
HGLibA_30063	MRPS21	32.49/0/15.446	0/0/0	3.6003	0	-2.2017	493.94	137.8	0.3067	0.0057071	0.99429	0.011414	0.27359	FALSE
HGLibA_03719	ATP6V0D1	25.382/0/19.737	0/0/0	3.5975	0	-2.2008	374.01	137.69	0.30658	0.00571	0.99429	0.01142	0.27367	FALSE
HGLibA_13751	DOCK6	10.153/41.78/42.907	0/0/22.319	26.332	0.50749	-4.1804	387.56	1007.8	0.81346	0.0057132	0.99429	0.011426	0.27377	FALSE
HGLibB_47590	STX4	320.83/164.34/207.67	0.81369/62.723/115.03	222.06	18.666	-3.5037	6647.9	8499.1	2.2062	0.0057251	0.99427	0.01145	0.27417	FALSE
HGLibA_17749	FNDC3B	108.64/84.953/157.9	30.92/0/18.885	113.38	3.7906	-4.5774	1406.2	4339.4	1.6636	0.0057282	0.99427	0.011456	0.27427	FALSE
HGLibA_12648	DDX1	57.872/0/49.772	0/0/1.7168	6.5124	0.16289	-2.6916	2275.8	249.26	0.40218	0.0057398	0.99426	0.01148	0.27471	FALSE
HGLibA_42255	RRM2	185.8/125.34/108.98	0/27.271/66.956	136.41	5.583	-4.3836	1657.1	5220.9	1.8106	0.0057494	0.99425	0.011499	0.27512	FALSE
HGLibB_14300	E2F6	18.275/26.461/0	0/0/0	3.5545	0	-2.1873	377.02	136.04	0.30474	0.0057541	0.99425	0.011508	0.27529	FALSE
HGLibA_12660	DDX18	48.734/47.351/5.1488	0/0/16.31	22.897	0.44748	-4.0452	790.27	876.37	0.75835	0.005763	0.99424	0.011526	0.2756	FALSE
HGLibA_62298	hsa-mir-5692c-1	91.377/12.534/15.446	0/0/22.319	26.092	0.50749	-4.1676	2279.7	998.63	0.80959	0.0057653	0.99423	0.011531	0.2756	FALSE
HGLibA_45986	SNRPE	16.245/52.922/12.872	0/0/15.451	22.302	0.43776	-4.0185	531.59	853.57	0.74835	0.0057788	0.99422	0.011558	0.27608	FALSE
HGLibB_26974	LONP1	154.33/61.278/136.44	0/30.907/15.451	108.88	3.5398	-4.5971	2545.6	4167.1	1.6318	0.0057896	0.99421	0.011579	0.27643	FALSE
HGLibA_25024	KLB	34.52/29.246/18.879	0/0/24.035	26.715	0.52261	-4.1861	64.365	1022.5	0.81912	0.0058008	0.9942	0.011602	0.27685	FALSE
HGLibB_30603	MYBL2	38.581/0/12.014	0/0/0	3.5052	0	-2.1716	657.51	134.16	0.30262	0.0058057	0.99419	0.011611	0.27698	FALSE
HGLibA_63060	hsa-mir-6727	23.352/0/19.737	0/0/0	3.4965	0	-2.1688	335.11	133.83	0.30225	0.0058149	0.99419	0.01163	0.27721	FALSE
HGLibA_10217	CMTM4	156.36/238.15/202.52	0/149.08/170.82	196.1	13.562	-3.7587	1694.4	7505.6	2.107	0.0058263	0.99417	0.011653	0.27763	FALSE
HGLibB_26609	LIX1L	68.025/45.958/17.163	0/0/62.664	37.736	0.75619	-4.4632	704.14	1444.3	0.97305	0.0058317	0.99417	0.011663	0.27783	FALSE
HGLibB_00324	ABR	14.214/0/31.751	0/0/0	3.4724	0	-2.1611	463.56	132.9	0.30121	0.0058406	0.99416	0.011681	0.27809	FALSE
HGLibA_58926	hsa-mir-320b-1	0/23.675/18.879	0/0/0	3.4601	0	-2.1571	329.18	132.43	0.30067	0.0058539	0.99415	0.011708	0.27861	FALSE
HGLibA_05211	C11orf91	52.796/8.356/0	0/0/0	3.4497	0	-2.1537	1235.5	132.04	0.30022	0.0058651	0.99413	0.01173	0.27898	FALSE
HGLibB_20870	HAVCR1	686.34/249.29/429.92	74.86/119.99/122.75	419.01	103.31	-2.0095	50196	16037	2.4929	0.0058695	0.99413	0.011739	0.27913	FALSE
HGLibB_38506	PRKCI	11.168/38.995/0	0/0/0	3.4318	0	-2.1479	668.18	131.35	0.29944	0.0058847	0.99412	0.011769	0.27957	FALSE
HGLibA_38252	PQLC1	295.45/196.37/199.95	0/360.88/230.91	226.37	20.179	-3.4244	3185.4	8664.2	2.2152	0.0059094	0.99409	0.011819	0.28053	FALSE
HGLibA_05833	C1orf226	43.658/97.487/41.19	0/4.5451/5.1504	55.975	1.2461	-4.6648	1046.8	2142.4	1.1824	0.0059248	0.99408	0.01185	0.28103	FALSE
HGLibA_42087	RPS17	16.245/20.89/11.156	0/0/7.7257	15.589	0.32773	-3.6432	24.093	596.65	0.62478	0.0059392	0.99406	0.011878	0.28149	FALSE
HGLibA_37551	POLR1B	248.75/86.346/79.806	0/54.542/16.31	119.69	4.3758	-4.4887	9679.3	4581	1.7037	0.0059461	0.99405	0.011892	0.28171	FALSE
HGLibA_57989	hsa-mir-1827	31.474/22.283/22.311	0/21.817/0	25.013	0.50292	-4.1134	28.25	957.37	0.79216	0.0059546	0.99405	0.011909	0.28197	FALSE
HGLibA_55659	ZNF248	34.52/26.461/28.318	33.361/0/0	29.575	0.59425	-4.2614	17.866	1132	0.86138	0.0059549	0.99405	0.01191	0.28197	FALSE
HGLibB_02388	APC	604.1/268.79/511.45	161.11/87.267/105.58	436.29	114.08	-1.926	30933	16699	2.4935	0.0059598	0.99404	0.01192	0.28213	FALSE
HGLibA_07459	CBX6	131.99/16.712/18.879	0/52.724/0	34.701	0.70837	-4.3853	5019.5	1328.1	0.93274	0.005996	0.994	0.011992	0.28349	FALSE
HGLibB_43975	SHFM1	6.0918/57.1/19.737	0/0/12.018	19.053	0.39485	-3.8456	808.01	729.22	0.69092	0.0060168	0.99398	0.012034	0.2841	FALSE
HGLibB_29702	MPO	108.64/168.51/267.74	0/49.087/190.57	169.87	9.6883	-3.9988	6664.6	6501.7	1.9866	0.0060199	0.99398	0.01204	0.28419	FALSE
HGLibA_36331	PHF1	33.505/30.639/14.588	0/21.817/0	24.656	0.50292	-4.0935	107.73	943.7	0.78625	0.0060383	0.99396	0.012077	0.28489	FALSE
HGLibB_09050	CENPI	174.63/164.34/48.914	0/73.631/8.5841	111.99	3.9006	-4.5271	5321.4	4286.3	1.651	0.006054	0.99395	0.012108	0.28549	FALSE
HGLibA_52794	UBXN7	27.413/86.346/17.163	0/0/53.221	34.398	0.7109	-4.3709	1522.2	1316.6	0.92842	0.0060756	0.99392	0.012151	0.28628	FALSE
HGLibB_51323	TRIAP1	142.14/66.848/170.77	36.616/0/23.177	117.52	4.3048	-4.4817	3004.7	4497.9	1.6881	0.0060762	0.99392	0.012152	0.28628	FALSE
HGLibB_19599	GOLGA6L4	44.673/11.141/30.893	0/22.726/0	24.886	0.51114	-4.0985	308.26	952.49	0.78979	0.0060827	0.99392	0.012165	0.28649	FALSE
HGLibA_48516	TBC1D25	173.62/154.59/216.25	0/127.26/115.03	179.71	11.261	-3.8816	1001.7	6878.3	2.0311	0.0060924	0.99391	0.012185	0.28682	FALSE
HGLibB_03099	ARPP21	10.153/41.78/31.751	0/20.908/0	23.814	0.49446	-4.0535	286.2	911.48	0.77242	0.0061382	0.99386	0.012276	0.28864	FALSE
HGLibB_26964	LOC730183	0/16.712/21.453	0/0/0	3.2091	0	-2.0735	262.74	122.83	0.28956	0.0061406	0.99386	0.012281	0.28869	FALSE
HGLibB_13148	DHX15	24.367/48.744/24.028	0/0/39.487	30.564	0.63426	-4.2716	205.81	1169.8	0.87508	0.0061452	0.99385	0.01229	0.28885	FALSE
HGLibA_07859	CCDC73	34.52/122.56/44.623	29.293/0.90903/0	57.38	1.3368	-4.6429	2466.6	2196.2	1.1959	0.0061509	0.99385	0.012302	0.2889	FALSE
HGLibA_05331	C14orf159	26.398/0/15.446	0/0/0.85841	3.3537	0.11241	-1.9685	344.26	128.36	0.28609	0.0061556	0.99384	0.012311	0.2889	FALSE
HGLibB_14690	EIF1AX	29.444/0/12.014	0/0/0	3.1955	0	-2.0688	388.47	122.3	0.28894	0.0061572	0.99384	0.012314	0.2889	FALSE
HGLibA_32181	NMI	34.52/25.068/12.872	0/18.181/0	22.342	0.46754	-3.9915	122.71	855.12	0.74804	0.0061639	0.99384	0.012328	0.28902	FALSE
HGLibA_61270	hsa-mir-4791	37.566/38.995/14.588	0/0/30.903	27.762	0.57681	-4.1891	197.92	1062.6	0.83398	0.0061645	0.99384	0.012329	0.28902	FALSE
HGLibA_02929	ARL13A	27.413/51.529/7.7232	0/0/18.027	22.215	0.46594	-3.9852	548.16	850.28	0.74588	0.0061755	0.99382	0.012351	0.28936	FALSE
HGLibA_49378	THOC7	84.27/175.48/78.948	0/19.999/24.035	105.3	3.547	-4.5471	3030.7	4030.3	1.6028	0.0061995	0.9938	0.012399	0.29015	FALSE
HGLibB_15229	EPB41L4A	55.841/27.853/30.893	0/0/66.097	36.359	0.77153	-4.3984	240.89	1391.6	0.95399	0.006206	0.99379	0.012412	0.29039	FALSE
HGLibA_46764	SPOP	24.367/25.068/19.737	0/0/19.743	22.931	0.48327	-4.012	8.4157	877.64	0.75771	0.0062184	0.99378	0.012437	0.29074	FALSE
HGLibB_18182	FUT8	72.086/23.675/17.163	0/0/42.062	30.843	0.64985	-4.2706	969.76	1180.5	0.87878	0.0062379	0.99376	0.012476	0.29136	FALSE
HGLibB_31406	NDUFA13	117.77/68.241/45.481	21.156/0/3.4336	71.508	1.8584	-4.6649	1414.3	2736.9	1.3313	0.00624	0.99376	0.01248	0.29136	FALSE
HGLibA_59038	hsa-mir-34b	31.474/0/12.014	0/0/0.85841	3.2693	0.11241	-1.9403	441.34	125.13	0.28221	0.0062559	0.99374	0.012512	0.29204	FALSE
HGLibA_12966	DENND6A	23.352/6.9634/27.46	9.7643/0/0	16.489	0.36205	-3.6826	129.1	631.11	0.64196	0.0062578	0.99374	0.012516	0.29208	FALSE
HGLibB_40760	RELA	40.612/0/7.7232	0/0/0	3.0698	0	-2.025	720.25	117.49	0.28321	0.0063148	0.99369	0.01263	0.29439	FALSE
HGLibA_29903	MRPL14	36.551/0/8.5813	0/0/0	3.0688	0	-2.0246	580.43	117.45	0.28316	0.0063162	0.99368	0.012632	0.2944	FALSE
HGLibB_18596	GAPT	10.153/30.639/0	0/0/0	3.0587	0	-2.021	410.17	117.07	0.2827	0.0063292	0.99367	0.012658	0.29477	FALSE
HGLibB_31463	NDUFB10	0/18.105/17.163	0/0/0	3.0557	0	-2.02	217.41	116.95	0.28256	0.0063332	0.99367	0.012666	0.2949	FALSE
HGLibA_53949	WAS	81.224/225.61/151.03	0/43.633/66.097	140.41	6.5153	-4.2339	5437.6	5374.1	1.8265	0.0063413	0.99366	0.012683	0.29522	FALSE
HGLibA_60489	hsa-mir-4511	24.367/12.534/0	0/0/0	3.0384	0	-2.0138	277.16	116.29	0.28175	0.0063558	0.99364	0.012712	0.29567	FALSE
HGLibA_43676	SETX	41.627/32.031/30.035	0/0/59.23	34.214	0.74028	-4.3388	38.593	1309.5	0.92502	0.0063664	0.99363	0.012733	0.29604	FALSE
HGLibA_47454	STK11	421.35/292.46/250.57	75.673/65.45/28.327	313.73	51.973	-2.5708	8011.5	12008	2.3887	0.0063687	0.99363	0.012737	0.29609	FALSE
HGLibA_15008	EMC2	138.08/203.33/158.75	0/105.45/82.407	164.57	9.4495	-3.986	1118.9	6298.9	1.9545	0.0063822	0.99362	0.012764	0.29655	FALSE
HGLibA_30207	MSI2	170.57/172.69/182.78	0/105.45/131.34	175.27	11.053	-3.8703	42.587	6708.2	2.005	0.006406	0.99359	0.012812	0.29716	FALSE
HGLibA_27967	MAGED1	61.933/16.712/25.744	41.498/0/0	29.883	0.64649	-4.2293	608.92	1143.7	0.86449	0.0064137	0.99359	0.012827	0.29743	FALSE
HGLibA_26655	LLPH	40.612/6.9634/5.1488	0/0/5.1504	11.371	0.27445	-3.279	456.59	435.21	0.53191	0.0064203	0.99358	0.012841	0.29768	FALSE
HGLibB_32306	NOTCH3	6.0918/47.351/0	0/0/0	2.9857	0	-1.9948	993.41	114.27	0.2793	0.006426	0.99357	0.012852	0.29789	FALSE
HGLibB_52426	U2AF1	47.719/0/6.0069	0/0/0	2.9795	0	-1.9926	1009.8	114.04	0.27901	0.0064344	0.99357	0.012869	0.29816	FALSE
HGLibB_39187	PSTK	442.67/406.66/325.23	38.244/194.53/97	388.3	89.72	-2.1014	3635.4	14862	2.4492	0.0064398	0.99356	0.01288	0.2983	FALSE
HGLibA_32360	NOV	75.132/267.39/78.948	0/19.999/48.071	116.64	4.4918	-4.4209	12935	4464.1	1.6784	0.0064574	0.99354	0.012915	0.29888	FALSE
HGLibA_09015	CELF5	16.245/0/17.163	0/0/0	2.9444	0	-1.9798	193.87	112.69	0.27736	0.0064823	0.99352	0.012965	0.29986	FALSE
HGLibA_18437	GAGE12B	448.76/413.62/473.69	117.99/180.9/87.557	444.67	123.18	-1.8436	911.38	17019	2.4643	0.0065389	0.99346	0.013078	0.30179	FALSE
HGLibB_10796	COX11	10.153/27.853/45.481	0/23.635/0	23.452	0.51915	-4.0086	340.76	897.59	0.76544	0.0065419	0.99346	0.013084	0.30186	FALSE
HGLibA_47109	SS18L2	37.566/6.9634/0	0/0/0	2.8853	0	-1.958	613.86	110.43	0.27456	0.006565	0.99344	0.01313	0.30284	FALSE
HGLibA_28534	MBTPS1	270.07/565.42/537.19	78.928/104.54/195.72	434.51	117.33	-1.8799	27361	16630	2.4595	0.0065814	0.99342	0.013163	0.30335	FALSE
HGLibB_17435	FGGY	33.505/0/7.7232	0/0/0	2.8735	0	-1.9536	485.03	109.98	0.274	0.0065818	0.99342	0.013164	0.30335	FALSE
HGLibA_35907	PDLIM1	121.84/93.309/58.353	0/6.3632/33.478	87.219	2.6893	-4.5797	1034.3	3338.2	1.463	0.0065857	0.99341	0.013171	0.30343	FALSE
HGLibB_33026	NUP85	15.229/66.848/12.872	0/24.544/0	23.601	0.52695	-4.01	1027.8	903.29	0.76772	0.006601	0.9934	0.013202	0.304	FALSE
HGLibA_37616	POLR3C	48.734/135.09/46.339	0/25.453/2.5752	67.33	1.7979	-4.6101	2688.9	2577	1.2909	0.0066123	0.99339	0.013225	0.30417	FALSE
HGLibA_03555	ATP11A	490.39/299.42/192.22	15.46/75.449/101.29	304.48	49.113	-2.6078	23595	11654	2.3655	0.0066204	0.99338	0.013241	0.30448	FALSE
HGLibA_38524	PRKAR1B	24.367/0/10.298	0/0/0	2.8411	0	-1.9415	263.52	108.74	0.27245	0.0066285	0.99337	0.013257	0.30473	FALSE
HGLibB_28326	MARK2	30.459/36.209/34.325	0/0/63.522	33.578	0.76007	-4.2961	8.6057	1285.2	0.91544	0.0066732	0.99333	0.013346	0.30644	FALSE
HGLibA_52687	UBE3D	550.29/437.3/277.18	96.016/92.721/115.88	405.55	101.05	-1.9942	19219	15522	2.4441	0.0066975	0.9933	0.013395	0.30731	FALSE
HGLibA_31565	NDUFS8	41.627/13.927/43.765	0/44.542/0	29.401	0.66427	-4.1911	297.63	1125.3	0.85664	0.0067034	0.9933	0.013407	0.30748	FALSE
HGLibA_31134	NAPG	136.05/94.702/151.89	0/29.998/54.08	125.08	5.3633	-4.3085	880.94	4787.5	1.7303	0.0067078	0.99329	0.013416	0.30761	FALSE
HGLibA_37588	POLR2I	40.612/59.885/35.183	0/0.90903/14.593	44.068	1.0403	-4.4653	170.53	1686.7	1.0477	0.0067098	0.99329	0.01342	0.30764	FALSE
HGLibA_09202	CERS2	542.17/850.92/518.31	252.24/250.89/218.04	620.69	239.85	-1.368	34827	23756	2.4709	0.0067113	0.99329	0.013423	0.30765	FALSE
HGLibA_33059	NUP54	107.62/0/15.446	0/1.8181/0	5.412	0.16768	-2.4571	5288.4	207.14	0.36438	0.0067127	0.99329	0.013425	0.30766	FALSE
HGLibB_24079	KBTBD7	122.85/214.47/18.879	0/20.908/6.8672	79.307	2.3461	-4.585	11909	3035.4	1.3969	0.0067192	0.99328	0.013438	0.30789	FALSE
HGLibB_29913	MRPL33	141.13/55.707/108.98	0/16.362/21.46	94.987	3.1864	-4.5191	1933.8	3635.5	1.5225	0.0067417	0.99326	0.013483	0.30875	FALSE
HGLibB_19678	GP2	4.0612/0/55.779	0/0/0	2.7542	0	-1.9085	1410.4	105.42	0.26825	0.0067578	0.99324	0.013516	0.30937	FALSE
HGLibA_23810	ITIH3	48.734/13.927/6.0069	0/0/11.159	16.013	0.38288	-3.6209	587.59	612.87	0.63135	0.0067874	0.99321	0.013575	0.3104	FALSE
HGLibA_51025	TOR1B	97.469/8.356/47.197	0/0/67.814	33.819	0.779	-4.2907	2439.3	1294.4	0.91834	0.0067882	0.99321	0.013576	0.3104	FALSE
HGLibA_32300	NOP10	48.734/121.16/72.941	0/17.271/6.8672	75.526	2.196	-4.5816	1403.6	2890.7	1.3639	0.0067947	0.99321	0.013589	0.31058	FALSE
HGLibA_43667	SETDB1	97.469/130.91/92.678	13.019/0/49.788	105.75	3.9299	-4.4365	436.27	4047.5	1.6004	0.0068456	0.99315	0.013691	0.31267	FALSE
HGLibA_24684	KIAA1033	337.08/313.35/557.79	23.597/187.26/179.41	389.12	92.615	-2.0591	18449	14893	2.4296	0.0068475	0.99315	0.013695	0.3127	FALSE
HGLibB_37528	POLR2E	0/41.78/6.8651	0/0.90903/0	2.9783	0.11609	-1.8337	764.78	113.99	0.26808	0.0068516	0.99315	0.013703	0.31277	FALSE
HGLibA_31486	NDUFAF2	19.291/87.738/5.1488	0/0/19.743	20.655	0.48327	-3.8678	2371.3	790.53	0.71742	0.0068536	0.99315	0.013707	0.31279	FALSE
HGLibA_54078	WDR37	203.06/86.346/127	0/81.812/27.469	130.59	5.9896	-4.2347	3611.1	4998.3	1.7624	0.0068575	0.99314	0.013715	0.31291	FALSE
HGLibA_10017	CLHC1	9.1377/51.529/61.786	53.704/0/0	30.804	0.71334	-4.2143	929.4	1179	0.87635	0.0068621	0.99314	0.013724	0.31306	FALSE
HGLibA_48856	TCTE1	62.949/23.675/18.021	0/49.996/0	29.96	0.69421	-4.1917	635.14	1146.7	0.86425	0.0068728	0.99313	0.013746	0.31325	FALSE
HGLibA_23343	INPP5A	166.51/43.173/73.799	0/1.8181/90.133	80.968	2.4867	-4.5551	4398.6	3099	1.4098	0.0068938	0.99311	0.013788	0.31385	FALSE
HGLibB_07397	CBLL1	708.68/403.87/430.78	106.59/149.99/251.51	497.72	159.03	-1.6399	28895	19050	2.4539	0.0069105	0.99309	0.013821	0.31455	FALSE
HGLibB_17751	FNTB	295.45/389.95/290.91	203.42/18.181/54.08	322.42	58.534	-2.4416	3140.2	12340	2.3755	0.0069244	0.99308	0.013849	0.31506	FALSE
HGLibA_49204	TGFA	0/13.927/14.588	0/0/0	2.6414	0	-1.8645	138.53	101.1	0.2627	0.0069353	0.99306	0.013871	0.31538	FALSE
HGLibA_57965	hsa-mir-181b-1	0/18.105/11.156	0/0/0	2.6364	0	-1.8625	159.4	100.91	0.26246	0.0069434	0.99306	0.013887	0.31562	FALSE
HGLibA_54381	WNT7A	0/16.712/12.014	0/0/0	2.6309	0	-1.8603	146.62	100.69	0.26218	0.0069525	0.99305	0.013905	0.31598	FALSE
HGLibA_57306	hsa-mir-1227	67.01/71.026/37.758	0/2.7271/13.734	56.436	1.4756	-4.5361	336.78	2160	1.1825	0.0069585	0.99304	0.013917	0.31613	FALSE
HGLibB_40147	RANBP17	20.306/61.278/0	0/0/1.7168	4.9033	0.16289	-2.3438	1719.7	187.67	0.34603	0.0069687	0.99303	0.013937	0.31642	FALSE
HGLibB_30271	MTA2	179.71/289.68/451.38	30.107/67.268/39.487	286.43	43.088	-2.7047	19304	10963	2.3241	0.0069688	0.99303	0.013938	0.31642	FALSE
HGLibB_14559	EFNA1	281.24/765.97/593.83	24.411/482.69/369.97	503.88	163.51	-1.6178	63176	19285	2.451	0.0069822	0.99302	0.013964	0.31679	FALSE
HGLibA_32917	NUCKS1	31.474/8.356/18.879	0/0/13.734	17.076	0.4172	-3.673	143.3	653.57	0.65163	0.0070019	0.993	0.014004	0.31726	FALSE
HGLibB_55170	ZFP82	0/6.9634/27.46	0/0/0	2.5901	0	-1.844	322.18	99.133	0.26014	0.0070199	0.99298	0.01404	0.31789	FALSE
HGLibB_21817	HNRNPU	154.33/142.05/88.388	42.312/0/42.92	124.67	5.5718	-4.2572	1249	4771.7	1.7242	0.0070383	0.99296	0.014077	0.31861	FALSE
HGLibB_32979	NUP153	156.36/178.26/111.56	0/62.723/78.973	145.96	7.8198	-4.0585	1167.5	5586.4	1.8482	0.0070456	0.99295	0.014091	0.31882	FALSE
HGLibB_47340	STAT5B	159.4/239.54/131.29	0/132.72/112.45	171.15	11.334	-3.803	3201.8	6550.7	1.9746	0.0070477	0.99295	0.014095	0.31885	FALSE
HGLibB_22150	HSD17B12	6.0918/30.639/37.758	0/0/18.027	19.215	0.46594	-3.7855	323.29	735.42	0.69136	0.007053	0.99295	0.014106	0.319	FALSE
HGLibA_38492	PRKAA1	36.551/26.461/6.8651	0/17.271/0	18.827	0.45797	-3.7654	257.75	720.59	0.6843	0.0070589	0.99294	0.014118	0.31912	FALSE
HGLibB_48139	TAF10	522.88/305/400.75	128.56/79.085/98.717	399.81	100.13	-1.9868	12068	15303	2.4226	0.0070939	0.99291	0.014188	0.32027	FALSE
HGLibB_20931	HCFC1	26.398/0/6.8651	0/0/0	2.5427	0	-1.8248	297.11	97.319	0.25775	0.0071003	0.9929	0.014201	0.3205	FALSE
HGLibB_23375	INTS1	688.37/334.24/393.03	96.016/320.89/70.389	448.85	129.46	-1.7859	36811	17179	2.4368	0.0071027	0.9929	0.014205	0.32055	FALSE
HGLibB_02848	ARHGEF33	14.214/19.497/62.644	0/37.27/0	25.912	0.62029	-4.0539	763.6	991.77	0.80312	0.0071053	0.99289	0.014211	0.32061	FALSE
HGLibA_00045	AAED1	20.306/44.566/16.305	0/32.725/0	24.536	0.58982	-4.0056	243.42	939.08	0.78141	0.0071234	0.99288	0.014247	0.3213	FALSE
HGLibA_28550	MC4R	61.933/13.927/28.318	0/0/50.646	29.034	0.69763	-4.145	655.56	1111.2	0.85003	0.0071346	0.99287	0.014269	0.32175	FALSE
HGLibA_12872	DEFB123	83.255/93.309/92.678	0/16.362/18.885	89.627	3.0499	-4.484	31.738	3430.4	1.4782	0.0071532	0.99285	0.014306	0.32246	FALSE
HGLibA_03094	ARPC5L	220.32/167.12/132.15	0/130.9/110.73	169.46	11.224	-3.8017	1992.1	6485.8	1.9648	0.0071634	0.99284	0.014327	0.32286	FALSE
HGLibA_48112	SYVN1	74.117/12.534/12.014	0/0/26.611	22.379	0.54401	-3.9205	1440.6	856.53	0.74607	0.007168	0.99283	0.014336	0.3229	FALSE
HGLibA_52508	UAP1	126.91/79.382/148.46	0/27.271/42.062	114.36	4.7686	-4.3218	1271.8	4377.2	1.6565	0.0071683	0.99283	0.014337	0.3229	FALSE
HGLibA_44381	SLC12A9	27.413/19.497/21.453	0/27.271/0	22.551	0.54928	-3.9261	17.085	863.11	0.74889	0.007186	0.99281	0.014372	0.32345	FALSE
HGLibB_10743	COQ4	73.102/58.492/97.827	0/17.271/7.7257	74.79	2.2866	-4.5273	399.59	2862.5	1.3551	0.0071952	0.9928	0.01439	0.32368	FALSE
HGLibB_52295	TVP23B	635.58/675.45/846.12	226.21/284.53/459.25	713.51	309.19	-1.2038	12554	27309	2.4466	0.0072024	0.9928	0.014405	0.32392	FALSE
HGLibB_52190	TUBA3D	13.199/0/12.872	0/0/0	2.4839	0	-1.8007	114.45	95.069	0.25475	0.0072032	0.9928	0.014406	0.32392	FALSE
HGLibA_30043	MRPS16	61.933/133.7/70.367	21.97/0/10.301	83.528	2.742	-4.4976	1578.2	3197	1.4288	0.0072379	0.99276	0.014476	0.32523	FALSE
HGLibB_19068	GIMD1	21.321/0/7.7232	0/0/0	2.459	0	-1.7904	194.77	94.117	0.25347	0.0072478	0.99275	0.014496	0.32532	FALSE
HGLibA_03668	ATP5I	139.1/339.81/207.67	17.901/11.817/40.345	214.12	20.449	-3.3262	10734	8195.2	2.1394	0.0072596	0.99274	0.014519	0.32572	FALSE
HGLibB_30310	MTF2	125.9/107.24/112.42	0/89.085/13.734	114.92	4.8783	-4.3016	92.909	4398.4	1.6592	0.0072701	0.99273	0.01454	0.3261	FALSE
HGLibA_18348	GABPA	15.229/162.94/3.4325	0/22.726/0	20.568	0.51114	-3.8352	10296	787.23	0.71486	0.0072792	0.99272	0.014558	0.32636	FALSE
HGLibA_31488	NDUFAF3	40.612/40.387/8.5813	0/0/33.478	24.178	0.59505	-3.9805	388.04	925.38	0.77524	0.0072897	0.99271	0.014579	0.32661	FALSE
HGLibA_18350	GABPB1	56.857/8.356/54.921	0/0/57.513	29.713	0.7321	-4.1483	914.15	1137.3	0.85939	0.0073139	0.99269	0.014628	0.32748	FALSE
HGLibA_19675	GORAB	105.59/213.08/193.08	0/117.26/100.43	163.17	10.467	-3.8397	3350.3	6245.3	1.9323	0.0073302	0.99267	0.01466	0.32815	FALSE
HGLibB_05814	C1orf198	26.398/23.675/12.014	0/20.908/0	19.588	0.49446	-3.7841	60.223	749.72	0.69734	0.0073591	0.99264	0.014718	0.32932	FALSE
HGLibA_43749	SFSWAP	100.51/72.419/95.253	0/3.6361/85.841	88.51	3.0784	-4.456	224.25	3387.6	1.4678	0.0073842	0.99262	0.014768	0.33032	FALSE
HGLibB_28792	MEF2BNB	418.3/217.26/328.67	128.56/20.908/61.805	310.27	55.004	-2.4746	10330	11875	2.3425	0.0073894	0.99261	0.014779	0.33043	FALSE
HGLibB_46460	SPATA5	53.811/27.853/37.758	0/2.7271/4.292	38.397	0.97482	-4.3183	174.58	1469.6	0.97617	0.0073912	0.99261	0.014782	0.33045	FALSE
HGLibA_55614	ZNF223	61.933/23.675/18.879	0/63.632/0	30.263	0.76057	-4.1503	588	1158.3	0.86686	0.0074578	0.99254	0.014916	0.33312	FALSE
HGLibA_33763	OR2B11	0/11.141/12.872	0/0/0	2.3431	0	-1.7412	96.879	89.68	0.24742	0.0074652	0.99253	0.01493	0.33332	FALSE
HGLibA_00661	ACTR3B	338.09/526.43/247.14	30.92/143.63/100.43	353.01	76.43	-2.1928	20753	13511	2.3794	0.007484	0.99252	0.014968	0.33404	FALSE
HGLibA_25376	KPNB1	148.23/158.76/146.74	0/88.176/84.124	151.15	8.9592	-3.9333	42.963	5785.2	1.8695	0.0075079	0.99249	0.015016	0.33485	FALSE
HGLibB_01029	ADPRHL2	131.99/98.88/149.32	0/54.542/40.345	124.91	5.9459	-4.1801	661.66	4780.7	1.7205	0.0075162	0.99248	0.015032	0.33516	FALSE
HGLibA_35050	PAK4	62.949/8.356/8.5813	0/0/15.451	16.565	0.43776	-3.6108	1141.3	634.02	0.64049	0.007544	0.99246	0.015088	0.33621	FALSE
HGLibA_39513	PTPRK	67.01/1.3927/63.502	0/0/19.743	18.438	0.48327	-3.7121	2340.2	705.71	0.67589	0.0075905	0.99241	0.015181	0.33791	FALSE
HGLibA_41864	RPL12	48.734/87.738/16.305	0/17.271/0.85841	41.185	1.0852	-4.3385	1421.6	1576.3	1.01	0.0075951	0.9924	0.01519	0.33805	FALSE
HGLibA_28379	MARS2	155.34/136.48/96.969	0/129.99/19.743	127.16	6.2673	-4.1403	896.3	4866.8	1.7329	0.0076469	0.99235	0.015294	0.33962	FALSE
HGLibA_46046	SNX16	272.1/83.56/98.685	0/85.448/36.053	130.93	6.6627	-4.1058	11606	5011.2	1.7554	0.0076499	0.99235	0.0153	0.33966	FALSE
HGLibA_31433	NDST4	23.352/20.89/24.028	32.548/0/0	22.716	0.58857	-3.9	2.7295	869.43	0.75043	0.0076513	0.99235	0.015303	0.33966	FALSE
HGLibB_02232	ANXA2R	42.643/16.712/13.73	0/0/28.327	21.4	0.55753	-3.8462	266.03	819.06	0.72826	0.0076601	0.99234	0.01532	0.33999	FALSE
HGLibB_10476	COG7	334.03/324.49/150.17	5.6958/119.08/53.221	253.44	33.172	-2.8964	11104	9700.2	2.2365	0.0076621	0.99234	0.015324	0.34002	FALSE
HGLibA_55563	ZNF2	20.306/15.319/26.602	0/0/24.894	20.229	0.52991	-3.7945	32.363	774.26	0.70796	0.0076636	0.99234	0.015327	0.34002	FALSE
HGLibA_21275	HIAT1	9.1377/61.278/38.616	0/0/54.938	27.9	0.71951	-4.071	790.47	1067.8	0.83177	0.0076654	0.99233	0.015331	0.34003	FALSE
HGLibB_03709	ATP6V0B	610.19/600.24/440.22	247.36/131.81/227.48	544.28	195.02	-1.476	9152.2	20832	2.4198	0.0076832	0.99232	0.015366	0.34057	FALSE
HGLibB_17924	FOXR2	177.68/181.05/162.19	0/177.26/115.88	173.44	12.618	-3.6791	101.23	6638.2	1.9739	0.0076883	0.99231	0.015377	0.34074	FALSE
HGLibB_09990	CLEC5A	100.51/299.42/193.94	0/169.99/158.81	180.06	13.83	-3.6099	10384	6891.7	2.0024	0.0076949	0.99231	0.01539	0.3409	FALSE
HGLibB_29917	MRPL34	16.245/4.178/13.73	0/0/6.0088	9.7889	0.29384	-3.0598	44.347	374.66	0.49055	0.0077141	0.99229	0.015428	0.34156	FALSE
HGLibA_32432	NPEPPS	147.22/182.44/151.89	0/91.812/128.76	159.79	10.48	-3.8079	366.75	6115.6	1.9092	0.0077616	0.99224	0.015523	0.34309	FALSE
HGLibB_07209	CAPZB	54.826/238.15/78.09	0/17.271/41.203	100.67	4.0554	-4.3299	10756	3852.9	1.5564	0.0077838	0.99222	0.015568	0.34394	FALSE
HGLibA_22999	IL17D	0/22.283/6.0069	0/0/0.85841	2.291	0.11241	-1.5648	209.36	87.686	0.23265	0.0078016	0.9922	0.015603	0.34448	FALSE
HGLibA_60950	hsa-mir-4712	43.658/11.141/6.8651	0/0/13.734	14.975	0.4172	-3.4947	451.58	573.17	0.60809	0.0078287	0.99217	0.015657	0.34536	FALSE
HGLibA_41986	RPL5	4.0612/20.89/46.339	0/0/15.451	15.848	0.43776	-3.5507	547.03	606.57	0.6257	0.0078343	0.99217	0.015669	0.34554	FALSE
HGLibA_21018	HDAC6	436.58/346.78/620.43	86.251/196.35/153.65	454.57	137.55	-1.7173	19726	17398	2.4034	0.0078388	0.99216	0.015678	0.34561	FALSE
HGLibA_01763	AMDHD2	243.67/153.19/72.083	0/34.543/139.92	139.1	7.7572	-3.9999	7812.4	5324	1.8001	0.0078462	0.99215	0.015692	0.34581	FALSE
HGLibB_31239	NCBP1	139.1/155.98/32.609	26.852/14.544/0	89.137	3.3048	-4.3881	5079.6	3411.6	1.4695	0.0078521	0.99215	0.015704	0.34598	FALSE
HGLibB_17184	FCHO2	27.413/20.89/6.8651	0/0/15.451	15.804	0.43776	-3.5469	120.28	604.86	0.62478	0.007853	0.99215	0.015706	0.34598	FALSE
HGLibB_43584	SETD1A	31.474/59.885/169.91	3.2548/0/35.195	68.441	2.1792	-4.449	5867.9	2619.5	1.2947	0.0078583	0.99214	0.015717	0.34615	FALSE
HGLibA_22172	HSD17B10	279.21/149.02/143.31	34.175/4.5451/18.885	181.34	14.359	-3.5695	6034.7	6940.5	2.0043	0.0078818	0.99212	0.015764	0.34693	FALSE
HGLibA_64385	NonTargetingControlGuideForHuman_0002	93.408/266/200.8	0/92.721/213.74	170.89	12.467	-3.6739	7972.4	6540.5	1.9588	0.007902	0.9921	0.015804	0.34769	FALSE
HGLibB_50300	TMEM30A	349.26/211.69/145.88	21.97/19.09/31.761	220.95	23.707	-3.1672	11093	8456.7	2.1449	0.0079078	0.99209	0.015816	0.34788	FALSE
HGLibB_21502	HIST2H2AC	3.0459/0/35.183	0/0/0	2.1307	0	-1.6465	548.93	81.55	0.23594	0.0079091	0.99209	0.015818	0.34788	FALSE
HGLibB_40631	RCC1	18.275/41.78/85.813	0/0.90903/17.168	40.336	1.1033	-4.2967	1278.5	1543.8	0.9985	0.0079149	0.99209	0.01583	0.34801	FALSE
HGLibA_62430	hsa-mir-583	44.673/75.204/108.12	0/11.817/12.018	71.359	2.3352	-4.4393	1039.3	2731.2	1.3208	0.0079151	0.99208	0.01583	0.34801	FALSE
HGLibB_19399	GMPPB	241.64/76.597/39.474	0/7.2722/58.372	90.095	3.4063	-4.3697	12856	3448.3	1.4762	0.0079521	0.99205	0.015904	0.34934	FALSE
HGLibA_30028	MRPS10	9.1377/37.602/6.8651	11.392/0/0	13.336	0.38618	-3.3705	324.17	510.44	0.5732	0.0079688	0.99203	0.015938	0.34986	FALSE
HGLibB_23710	ITGA7	98.484/77.99/115.85	0/21.817/27.469	96.184	3.824	-4.3324	361.5	3681.4	1.5222	0.0079716	0.99203	0.015943	0.34992	FALSE
HGLibB_45596	SMC3	39.597/13.927/18.021	0/0/31.761	21.509	0.583	-3.8298	198.41	823.23	0.72932	0.0079752	0.99202	0.01595	0.34995	FALSE
HGLibA_36657	PIK3R4	75.132/160.16/43.765	11.392/0/22.319	80.768	2.8535	-4.4073	3851.8	3091.3	1.4014	0.007981	0.99202	0.015962	0.35001	FALSE
HGLibB_35103	PAPPA2	38.581/47.351/88.388	0/0.90903/49.788	54.46	1.6138	-4.4072	726.88	2084.4	1.1575	0.0080014	0.992	0.016003	0.35071	FALSE
HGLibB_06041	C21orf59	386.83/306.39/137.3	19.529/37.27/54.938	253.42	34.205	-2.8534	17044	9699.4	2.2259	0.0080137	0.99199	0.016027	0.35105	FALSE
HGLibA_40634	RBP3	147.22/51.529/57.495	9.7643/0/19.743	75.847	2.595	-4.4179	3011	2903	1.3596	0.0080163	0.99198	0.016033	0.35105	FALSE
HGLibA_14074	DTWD1	6.0918/16.712/0	0/0/0	2.0835	0	-1.6246	117.2	79.743	0.23331	0.008017	0.99198	0.016034	0.35105	FALSE
HGLibA_47778	SUMO2	319.82/413.62/443.65	78.114/119.99/103.01	388.61	98.838	-1.9644	4193.8	14874	2.376	0.0080358	0.99196	0.016072	0.35143	FALSE
HGLibA_27697	LYG1	71.071/64.063/50.63	0/1.8181/42.062	61.316	1.9072	-4.4219	108.45	2346.8	1.2263	0.0080549	0.99195	0.01611	0.35202	FALSE
HGLibA_42449	RUNDC3A	179.71/182.44/151.03	0/149.99/139.06	170.45	12.683	-3.6473	303.28	6523.6	1.9533	0.0081189	0.99188	0.016238	0.35392	FALSE
HGLibB_43206	SEC62	86.3/119.77/102.98	0/37.27/23.177	102.1	4.3308	-4.2736	281.3	3907.9	1.564	0.008119	0.99188	0.016238	0.35392	FALSE
HGLibA_00536	ACRC	176.66/59.885/90.104	0/20.908/34.336	98.426	4.0667	-4.2945	3837.8	3767.2	1.5374	0.0081465	0.99185	0.016293	0.35486	FALSE
HGLibA_39985	RAB8A	71.071/9.7487/36.9	75.673/0/0	29.5	0.81167	-4.0734	1086.5	1129.1	0.85377	0.0081779	0.99182	0.016356	0.35586	FALSE
HGLibB_54308	WNT5A	7.1071/18.105/15.446	0/10.908/0	12.582	0.37926	-3.2997	34.34	481.57	0.55607	0.0082011	0.9918	0.016402	0.35678	FALSE
HGLibA_43668	SETDB1	399.01/392.73/291.77	137.51/84.539/48.071	357.58	82.378	-2.1046	3642	13686	2.3524	0.0082159	0.99178	0.016432	0.35729	FALSE
HGLibA_16886	FARSB	102.55/18.105/35.183	0/19.999/0.85841	40.298	1.1442	-4.2675	2196.7	1542.4	0.99697	0.0082218	0.99178	0.016444	0.35743	FALSE
HGLibA_28793	MED27	152.29/178.26/26.602	44.753/0/10.301	89.768	3.4999	-4.3342	7865.3	3435.8	1.4718	0.0082333	0.99177	0.016467	0.35779	FALSE
HGLibA_44835	SLC28A2	32.49/94.702/15.446	0/139.99/0	36.25	1.0189	-4.2056	1931.8	1387.4	0.94585	0.0082499	0.99175	0.0165	0.35838	FALSE
HGLibB_02635	ARCN1	151.28/140.66/45.481	0/27.271/28.327	98.932	4.1691	-4.273	3669.2	3786.5	1.54	0.0082824	0.99172	0.016565	0.35953	FALSE
HGLibA_20556	GTF2H3	236.56/261.82/193.08	23.597/22.726/36.053	228.68	26.841	-3.0443	1214	8752.6	2.1574	0.0082899	0.99171	0.01658	0.35966	FALSE
HGLibB_56860	ZNHIT2	47.719/71.026/39.474	0/4.5451/9.4425	51.148	1.5427	-4.3582	271.59	1957.7	1.1211	0.008303	0.9917	0.016606	0.36003	FALSE
HGLibA_55294	ZFYVE9	122.85/140.66/80.665	19.529/0/77.257	111.71	5.2349	-4.1761	963.03	4275.6	1.6284	0.0083089	0.99169	0.016618	0.36022	FALSE
HGLibB_51250	TRAPPC2	413.23/33.424/21.453	20.342/0/6.0088	66.743	2.22	-4.3949	61606	2554.5	1.2766	0.008318	0.99168	0.016636	0.36043	FALSE
HGLibA_12996	DERL1	166.51/51.529/19.737	0/32.725/1.7168	55.365	1.7134	-4.3766	6818.5	2119.1	1.1655	0.0083192	0.99168	0.016638	0.36043	FALSE
HGLibA_38268	PRAF2	126.91/114.2/187.07	0/75.449/76.398	139.44	8.2297	-3.9276	1531.4	5337.1	1.7961	0.0083266	0.99167	0.016653	0.36066	FALSE
HGLibB_19572	GOLGA3	156.36/160.16/104.69	0/76.358/70.389	137.89	8.038	-3.9418	969.46	5277.6	1.7874	0.0083311	0.99167	0.016662	0.36079	FALSE
HGLibA_08690	CDH7	0/36.209/37.758	0/0/2.5752	5.0609	0.19908	-2.3376	1032.5	193.7	0.34933	0.0083422	0.99166	0.016684	0.36114	FALSE
HGLibB_37540	POLR2I	22.337/11.141/55.779	0/47.269/0	24.055	0.67953	-3.899	588.05	920.68	0.77038	0.0083746	0.99163	0.016749	0.36216	FALSE
HGLibA_09799	CLASRP	144.17/130.91/155.32	0/72.722/95.283	143.12	8.7561	-3.8848	149.53	5477.8	1.8154	0.0083789	0.99162	0.016758	0.3622	FALSE
HGLibB_38483	PRKCA	141.13/167.12/139.88	0/101.81/88.416	148.87	9.5623	-3.8267	236.98	5697.7	1.8455	0.008392	0.99161	0.016784	0.36251	FALSE
HGLibB_44852	SLC30A3	7.1071/0/15.446	0/0.90903/0	2.1377	0.11609	-1.4912	103.19	81.817	0.2235	0.0084032	0.9916	0.016806	0.36293	FALSE
HGLibB_39124	PSMD4	74.117/158.76/102.12	62.654/0/18.885	106.32	4.8206	-4.2046	1902.6	4069.3	1.5911	0.0084049	0.9916	0.01681	0.36293	FALSE
HGLibA_30145	MS4A2	258.9/155.98/308.93	0.81369/158.17/155.37	231.93	28.124	-2.9996	6212.3	8877	2.1632	0.0084077	0.99159	0.016815	0.36299	FALSE
HGLibA_29946	MRPL3	78.178/91.916/90.104	0/22.726/18.027	86.512	3.3587	-4.3275	55.782	3311.2	1.4451	0.0084146	0.99159	0.016829	0.36316	FALSE
HGLibA_17407	FGF4	43.658/26.461/24.028	88.692/0/0	30.281	0.86115	-4.071	116.32	1159	0.86418	0.0084497	0.99155	0.016899	0.36441	FALSE
HGLibA_54637	YARS2	41.627/13.927/0	0/1.8181/0	3.7826	0.16768	-2.0342	774.71	144.78	0.30044	0.0085069	0.99149	0.017014	0.36665	FALSE
HGLibB_01727	ALS2CR8	0/29.246/2.5744	0/0/0	1.8873	0	-1.5297	376.27	72.234	0.22206	0.0085078	0.99149	0.017016	0.36665	FALSE
HGLibB_04392	BECN1	624.41/307.78/553.5	161.92/124.54/180.27	473.82	153.76	-1.6173	28297	18135	2.3767	0.0085193	0.99148	0.017039	0.36701	FALSE
HGLibB_23300	INO80E	42.643/0/1.7163	0/0/0	1.8801	0	-1.5261	832.57	71.958	0.22163	0.0085273	0.99147	0.017055	0.36729	FALSE
HGLibA_46999	SRP14	392.92/231.18/369	56.958/92.721/53.221	322.43	65.508	-2.2819	7731.7	12341	2.3128	0.0085326	0.99147	0.017065	0.36745	FALSE
HGLibB_47607	STXBP1	35.535/0/62.644	0/0/3.4336	5.9695	0.22815	-2.5046	2060.9	228.48	0.37983	0.0085476	0.99145	0.017095	0.36796	FALSE
HGLibA_34844	OXTR	24.367/50.136/12.014	0/0/52.363	24.501	0.70652	-3.9014	406.55	937.77	0.77703	0.0085572	0.99144	0.017114	0.36825	FALSE
HGLibA_03674	ATP5J2	3.0459/23.675/0	0/0/0	1.8556	0	-1.5138	240.48	71.023	0.22019	0.0085942	0.99141	0.017188	0.36917	FALSE
HGLibA_14813	EIF4B	176.66/174.08/117.56	0/118.17/99.575	153.48	10.464	-3.7523	1125.9	5874.5	1.866	0.0086008	0.9914	0.017202	0.36939	FALSE
HGLibA_11810	CUZD1	80.209/64.063/22.311	0.81369/0/44.637	48.597	1.4989	-4.3109	964.7	1860	1.0921	0.0086117	0.99139	0.017223	0.36977	FALSE
HGLibA_24203	KCNG3	6.0918/50.136/33.467	39.871/0/0	21.757	0.63663	-3.7975	593.96	832.71	0.73189	0.0086226	0.99138	0.017245	0.37001	FALSE
HGLibA_60771	hsa-mir-4664	133/182.44/149.32	0/99.084/120.18	153.59	10.506	-3.748	637.18	5878.5	1.8662	0.0086246	0.99138	0.017249	0.37001	FALSE
HGLibA_31156	NARS	116.76/119.77/37.758	0/30.907/10.301	80.842	3.083	-4.3251	2330.8	3094.2	1.3979	0.0086356	0.99136	0.017271	0.37029	FALSE
HGLibA_28917	MESP1	35.535/37.602/17.163	0/8.1812/0.85841	28.418	0.82587	-4.01	130.84	1087.7	0.83664	0.0086475	0.99135	0.017295	0.37062	FALSE
HGLibB_22384	HTRA4	42.643/133.7/72.083	0/18.181/12.018	74.358	2.7085	-4.3449	2266	2846	1.3431	0.0086481	0.99135	0.017296	0.37062	FALSE
HGLibB_53800	VSTM2L	166.51/183.83/159.61	0/123.63/192.28	169.68	13.252	-3.5821	155.85	6494.5	1.9411	0.0086529	0.99135	0.017306	0.37076	FALSE
HGLibB_16982	FBXL3	107.62/114.2/68.651	0/30.907/22.319	94.496	4.0117	-4.2521	614.24	3616.8	1.5046	0.0086608	0.99134	0.017322	0.37084	FALSE
HGLibB_46060	SOAT2	46.704/9.7487/18.879	0/0/35.195	20.505	0.6067	-3.7425	402.36	784.82	0.71029	0.0086751	0.99132	0.01735	0.37138	FALSE
HGLibB_45841	SNAPC3	55.841/38.995/102.12	0.81369/0/103.87	60.591	2.0179	-4.3511	1106.7	2319.1	1.2163	0.00868	0.99132	0.01736	0.37152	FALSE
HGLibB_08963	CEBPZ	61.933/139.27/54.062	3.2548/80.903/0	77.553	2.9065	-4.3297	2302.2	2968.3	1.3701	0.0086965	0.9913	0.017393	0.37196	FALSE
HGLibB_20562	GTF3C4	231.49/410.84/339.82	86.251/28.18/109.88	318.53	64.418	-2.2882	8275.1	12192	2.3014	0.0087425	0.99126	0.017485	0.37333	FALSE
HGLibA_62661	hsa-mir-6128	13.199/0/6.8651	0/0.90903/0	2.0001	0.11609	-1.4266	76.54	76.553	0.21533	0.0087471	0.99125	0.017494	0.37338	FALSE
HGLibB_30227	MSTO1	504.6/369.06/116.71	39.057/26.362/97	279.09	46.41	-2.5626	42659	10682	2.2513	0.0087497	0.99125	0.017499	0.37338	FALSE
HGLibB_43972	SHF	19.291/8.356/18.021	0/16.362/0	14.276	0.44806	-3.3991	37.108	546.41	0.59157	0.0087518	0.99125	0.017504	0.37339	FALSE
HGLibB_06672	C9orf131	16.245/18.105/24.028	30.92/0/0	19.191	0.57694	-3.6785	16.627	734.53	0.68682	0.0087552	0.99124	0.01751	0.37347	FALSE
HGLibA_55529	ZNF175	53.811/69.634/84.955	0/18.181/8.5841	68.282	2.4133	-4.3433	244.62	2613.4	1.2885	0.0087593	0.99124	0.017519	0.37352	FALSE
HGLibA_54577	XPOT	19.291/26.461/21.453	0/43.633/0	22.207	0.65905	-3.8062	13.583	849.97	0.73912	0.0087596	0.99124	0.017519	0.37352	FALSE
HGLibA_23427	INTS6	64.979/115.59/65.218	0/84.539/3.4336	78.833	3.0041	-4.3175	864.25	3017.3	1.3805	0.0087627	0.99124	0.017525	0.37359	FALSE
HGLibA_30067	MRPS23	30.459/12.534/16.305	0/0/28.327	18.402	0.55753	-3.6389	92.102	704.31	0.67238	0.0087805	0.99122	0.017561	0.37415	FALSE
HGLibB_06706	C9orf171	156.36/136.48/128.72	0/39.088/175.11	140.05	8.7222	-3.8588	203.5	5360.2	1.7937	0.0087902	0.99121	0.01758	0.37429	FALSE
HGLibB_29874	MRPL18	14.214/22.283/56.637	0/0/66.956	26.193	0.77528	-3.9371	542.8	1002.5	0.80278	0.008804	0.9912	0.017608	0.37455	FALSE
HGLibA_02066	ANKRD32	17.26/22.283/24.028	0/0/38.628	20.986	0.62891	-3.7546	12.408	803.22	0.71829	0.0088062	0.99119	0.017612	0.37455	FALSE
HGLibA_52810	UCK1	105.59/16.712/53.204	0.81369/0/37.77	45.483	1.4125	-4.2681	2250.2	1740.8	1.0563	0.0088071	0.99119	0.017614	0.37455	FALSE
HGLibA_03084	ARPC3	75.132/149.02/127.86	0/46.36/40.345	112.71	5.6277	-4.1007	1479.9	4313.8	1.6303	0.0088159	0.99118	0.017632	0.37479	FALSE
HGLibA_63634	hsa-mir-6862-2	45.688/15.319/4.2907	0/0/17.168	14.481	0.45686	-3.4096	539.23	554.24	0.59569	0.0088203	0.99118	0.017641	0.37491	FALSE
HGLibA_47086	SRSF7	41.627/37.602/49.772	0.81369/0/30.903	42.71	1.3149	-4.2389	38.565	1634.7	1.0238	0.0088393	0.99116	0.017679	0.37552	FALSE
HGLibB_42081	RPS29	8.1224/41.78/30.893	0/43.633/0	21.917	0.65905	-3.788	332.7	838.85	0.73397	0.008868	0.99113	0.017736	0.37627	FALSE
HGLibA_58032	hsa-mir-1909	76.147/132.3/62.644	0/3.6361/123.61	85.781	3.4887	-4.273	1396.3	3283.2	1.4362	0.0088843	0.99112	0.017769	0.37663	FALSE
HGLibA_45069	SLC38A4	117.77/15.319/57.495	0/21.817/1.7168	47.029	1.485	-4.2726	3060	1800	1.0735	0.0088907	0.99111	0.017781	0.37672	FALSE
HGLibA_59164	hsa-mir-3655	106.61/135.09/180.21	0/85.448/73.823	137.43	8.4835	-3.8675	1392.8	5259.8	1.7779	0.0089145	0.99109	0.017829	0.37744	FALSE
HGLibA_63689	hsa-mir-6876	141.13/123.95/221.4	0/179.08/85.841	157.04	11.448	-3.6664	2745.1	6010.6	1.878	0.0089838	0.99102	0.017968	0.37961	FALSE
HGLibA_32439	NPFFR1	86.3/59.885/51.488	8.9506/0/14.593	64.322	2.2692	-4.3206	333.72	2461.9	1.2506	0.0089849	0.99102	0.01797	0.37961	FALSE
HGLibA_47994	SYNGR2	34.52/0/12.872	0/1.8181/0	3.4545	0.16768	-1.9316	532.85	132.22	0.28585	0.0090167	0.99098	0.018033	0.38069	FALSE
HGLibA_11404	CSNK2A2	114.73/136.48/68.651	26.038/0/45.495	102.44	4.8211	-4.1514	1225.8	3920.9	1.559	0.0090375	0.99096	0.018075	0.3815	FALSE
HGLibA_56493	ZNF668	103.56/23.675/71.225	8.1369/0/9.4425	55.918	1.8883	-4.3006	1771.8	2140.2	1.1679	0.0090656	0.99093	0.018131	0.38227	FALSE
HGLibA_13462	DNAAF2	8.1224/20.89/39.474	0/0/32.619	18.873	0.58908	-3.6446	272.02	722.36	0.6803	0.0090752	0.99092	0.01815	0.38248	FALSE
HGLibB_26498	LIMD2	77.163/90.524/61.786	0/26.362/10.301	75.572	2.9192	-4.2882	208.07	2892.4	1.3509	0.0091085	0.99089	0.018217	0.38359	FALSE
HGLibA_51906	TSPAN15	292.41/71.026/102.12	0/81.812/54.08	128.5	7.5277	-3.9246	15432	4918.1	1.7249	0.0091193	0.99088	0.018239	0.38377	FALSE
HGLibA_62148	hsa-mir-5571	17.26/12.534/56.637	0/0/53.221	23.073	0.7109	-3.8146	635.69	883.11	0.75251	0.0091204	0.99088	0.018241	0.38377	FALSE
HGLibB_03989	B3GNT4	32.49/0/28.318	0/0/2.5752	4.4244	0.19908	-2.1775	689.08	169.34	0.3247	0.0091226	0.99088	0.018245	0.3838	FALSE
HGLibA_01559	ALDH2	1.0153/0/49.772	0/0/0	1.6718	0	-1.4178	1158.4	63.987	0.209	0.0091441	0.99086	0.018288	0.38443	FALSE
HGLibB_29442	MMP11	50.765/126.73/66.076	0/7.2722/36.911	75.198	2.9105	-4.2843	1668	2878.1	1.3474	0.0091526	0.99085	0.018305	0.38458	FALSE
HGLibB_07792	CCDC53	179.71/203.33/200.8	32.548/28.18/7.7257	194.32	19.232	-3.2711	168.36	7437.3	2.0302	0.0091558	0.99084	0.018312	0.38465	FALSE
HGLibA_49741	TMBIM4	29.444/30.639/0	0/0/2.5752	4.3949	0.19908	-2.1697	667.75	168.21	0.32351	0.0091629	0.99084	0.018326	0.38488	FALSE
HGLibB_15729	EXOC5	481.25/408.05/239.42	38.244/144.54/125.33	360.93	88.504	-2.0157	15731	13814	2.3178	0.0091715	0.99083	0.018343	0.38502	FALSE
HGLibB_44006	SHMT1	0/57.1/0.85813	0/0/0	1.6631	0	-1.4131	1538.3	63.653	0.20845	0.0091725	0.99083	0.018345	0.38502	FALSE
HGLibB_42841	SCFD1	151.28/40.387/0.85813	0/0/30.044	17.941	0.5705	-3.5922	9287.4	686.69	0.66289	0.0091893	0.99081	0.018379	0.38565	FALSE
HGLibA_18037	FRMPD4	255.86/89.131/151.89	0/96.357/132.19	151.31	10.747	-3.6967	7398	5791.4	1.8471	0.0091927	0.99081	0.018385	0.38573	FALSE
HGLibA_31518	NDUFB4	0/5.5707/9.4395	0/0/0	1.6554	0	-1.409	39.33	63.361	0.20797	0.0091975	0.9908	0.018395	0.38586	FALSE
HGLibA_24382	KCNRG	6.0918/0/8.5813	0/0/0	1.6517	0	-1.4069	35.231	63.219	0.20774	0.0092097	0.99079	0.018419	0.38631	FALSE
HGLibB_44140	SIPA1L1	146.2/355.13/172.48	0.81369/113.63/115.88	207.67	22.827	-3.1305	13380	7948.5	2.0733	0.009243	0.99076	0.018486	0.38736	FALSE
HGLibA_59797	hsa-mir-4273	5.0765/45.958/56.637	0/0/59.23	23.727	0.74028	-3.8287	962.56	908.13	0.76279	0.0092514	0.99075	0.018503	0.38753	FALSE
HGLibA_40143	RAI2	0/4.178/12.014	0/0/0	1.6305	0	-1.3953	58.481	62.406	0.2064	0.0092803	0.99072	0.018561	0.38845	FALSE
HGLibA_03772	ATP7B	32.49/54.314/1.7163	0/19.999/0	14.668	0.48576	-3.3986	1028.6	561.41	0.59856	0.0092823	0.99072	0.018565	0.38847	FALSE
HGLibB_18830	GDF10	0/9.7487/5.1488	0/0/0	1.6291	0	-1.3946	40.485	62.351	0.20631	0.0092852	0.99071	0.01857	0.3885	FALSE
HGLibB_17997	FRMD5	19.291/27.853/11.156	0/0/31.761	18.173	0.583	-3.5983	72.103	695.54	0.66695	0.0092869	0.99071	0.018574	0.3885	FALSE
HGLibA_06839	CABIN1	466.02/231.18/214.53	34.175/50.905/74.681	284.86	50.653	-2.4684	20324	10903	2.243	0.0092931	0.99071	0.018586	0.38864	FALSE
HGLibA_02156	ANKS3	86.3/16.712/12.872	4.0685/1.8181/0	26.51	0.82814	-3.9115	1928.4	1014.7	0.80625	0.0092993	0.9907	0.018599	0.38877	FALSE
HGLibA_18615	GAPDH	5.0765/23.675/43.765	0/0/29.186	17.443	0.56408	-3.5597	442.31	667.6	0.65325	0.0093118	0.99069	0.018624	0.38915	FALSE
HGLibB_19398	GMPPB	270.07/167.12/341.54	30.107/34.543/45.495	248.88	36.17	-2.749	7859.5	9525.6	2.1794	0.0093146	0.99069	0.018629	0.3892	FALSE
HGLibA_36284	PGR	38.581/13.927/9.4395	0/0/28.327	17.198	0.55753	-3.5464	264.07	658.23	0.64859	0.0093165	0.99068	0.018633	0.38921	FALSE
HGLibA_49021	TES	46.704/13.927/28.318	0/0/79.832	26.422	0.82805	-3.907	285.54	1011.3	0.80483	0.009329	0.99067	0.018658	0.38953	FALSE
HGLibB_39898	RAB43	24.367/9.7487/27.46	0/34.543/0	18.697	0.60233	-3.6197	94.51	715.6	0.67641	0.0093588	0.99064	0.018718	0.39043	FALSE
HGLibB_14473	EEF1B2	81.224/54.314/37.758	84.624/0/0.85841	55.027	1.91	-4.267	492.51	2106.1	1.1574	0.0093742	0.99063	0.018748	0.39087	FALSE
HGLibB_29975	MRPL53	97.469/174.08/118.42	0/84.539/50.646	126.19	7.445	-3.9128	1589.5	4829.9	1.7086	0.0093811	0.99062	0.018762	0.39109	FALSE
HGLibA_20447	GSS	30.459/15.319/12.872	0/32.725/0	18.184	0.58982	-3.593	93.549	695.98	0.66692	0.0093912	0.99061	0.018782	0.39133	FALSE
HGLibB_21885	HOXA5	84.27/72.419/74.658	14.646/0/22.319	76.949	3.1095	-4.2455	39.684	2945.1	1.3606	0.0094474	0.99055	0.018895	0.39297	FALSE
HGLibB_54183	WFDC10B	82.239/69.634/98.685	0/17.271/26.611	82.678	3.4934	-4.219	213.29	3164.4	1.4076	0.0094738	0.99053	0.018948	0.39393	FALSE
HGLibB_07221	CARD16	16.245/29.246/16.305	0/40.906/0	19.79	0.64293	-3.6615	57.068	757.44	0.69571	0.0094989	0.9905	0.018998	0.3949	FALSE
HGLibB_19829	GPR114	120.82/59.885/39.474	0/7.2722/23.177	65.866	2.4793	-4.2644	1876.2	2520.9	1.2624	0.0095058	0.99049	0.019012	0.39512	FALSE
HGLibA_44340	SLC10A4	162.45/153.19/181.92	0/154.53/164.81	165.43	13.562	-3.5146	215.34	6331.7	1.9086	0.0095299	0.99047	0.01906	0.39588	FALSE
HGLibB_15017	EME2	55.841/33.424/27.46	1.6274/0/12.876	37.15	1.2087	-4.1104	228.57	1421.9	0.95315	0.0095439	0.99046	0.019088	0.39636	FALSE
HGLibB_54076	WDR61	188.85/105.84/85.813	0.81369/20.908/17.168	119.71	6.8205	-3.9481	3060.5	4581.8	1.6678	0.009563	0.99044	0.019126	0.39701	FALSE
HGLibA_27491	LRRTM3	17.26/29.246/12.872	36.616/0/0	18.666	0.61606	-3.6051	73.743	714.42	0.6753	0.009588	0.99041	0.019176	0.39784	FALSE
HGLibA_61351	hsa-mir-488	134.02/114.2/101.26	0/29.998/92.708	115.72	6.4369	-3.9723	273.13	4429.2	1.6421	0.0096468	0.99035	0.019294	0.39952	FALSE
HGLibB_32126	NME6	53.811/0/53.204	0/0/5.1504	6.499	0.27445	-2.5568	2231	248.74	0.39467	0.0096988	0.9903	0.019398	0.40124	FALSE
HGLibA_39563	PTTG1	40.612/9.7487/13.73	0/0/33.478	17.6	0.59505	-3.5436	303.08	673.63	0.65519	0.0097503	0.99025	0.019501	0.40304	FALSE
HGLibB_09496	CHN1	77.163/150.41/61.786	0/11.817/61.805	89.514	4.0941	-4.1512	2314.8	3426	1.4594	0.0097542	0.99025	0.019508	0.40313	FALSE
HGLibA_32427	NPDC1	117.77/111.41/109.84	0/46.36/54.08	112.96	6.214	-3.9816	17.65	4323.4	1.6234	0.0097635	0.99024	0.019527	0.40345	FALSE
HGLibB_13473	DNAH6	77.163/125.34/221.4	0/75.449/72.106	128.9	8.0709	-3.84	5622.6	4933.6	1.7203	0.0097769	0.99022	0.019554	0.40386	FALSE
HGLibB_43221	SEH1L	29.444/25.068/11.156	0/0/46.354	20.203	0.67447	-3.6625	95.456	773.26	0.70228	0.0097839	0.99022	0.019568	0.40401	FALSE
HGLibB_03221	ASB16	300.53/144.84/32.609	0/31.816/77.257	112.44	6.1734	-3.9831	21400	4303.4	1.6199	0.0097872	0.99021	0.019574	0.40407	FALSE
HGLibB_22655	IFNA6	182.75/77.99/97.827	34.175/0/69.531	111.72	6.1029	-3.9882	3188.2	4276.1	1.6152	0.0097932	0.99021	0.019586	0.40425	FALSE
HGLibA_06618	C8orf4	101.53/139.27/65.218	0/29.998/37.77	97.34	4.7485	-4.0965	1403.6	3725.6	1.517	0.0097977	0.9902	0.019595	0.4043	FALSE
HGLibA_02637	ARCN1	26.398/15.319/4.2907	0/0/15.451	12.051	0.43776	-3.1822	138.37	461.23	0.54073	0.009804	0.9902	0.019608	0.4043	FALSE
HGLibA_51712	TRNT1	150.26/71.026/82.381	0/25.453/41.203	95.805	4.6258	-4.105	1880	3666.9	1.5057	0.0098146	0.99019	0.019629	0.40458	FALSE
HGLibB_48639	TCEA2	16.245/22.283/9.4395	0/24.544/0	15.068	0.52695	-3.3955	42.558	576.73	0.60551	0.0098511	0.99015	0.019702	0.40566	FALSE
HGLibB_30188	MSMP	3.0459/103.06/18.879	37.43/0/0	18.23	0.62132	-3.5682	3713.3	697.75	0.66663	0.0098744	0.99013	0.019749	0.40648	FALSE
HGLibB_45922	SNRPD2	33.505/193.58/135.59	0/25.453/42.062	95.842	4.6583	-4.0972	7509.2	3668.3	1.5055	0.0098808	0.99012	0.019762	0.40667	FALSE
HGLibA_22910	IK	91.377/59.885/86.671	0/8.1812/48.071	77.987	3.3169	-4.1936	291.2	2984.9	1.3667	0.0098871	0.99011	0.019774	0.40686	FALSE
HGLibB_21598	HLA-DQB1	252.81/86.346/79.806	0/38.179/97.858	120.34	7.1111	-3.903	10174	4605.8	1.6684	0.0098961	0.9901	0.019792	0.40702	FALSE
HGLibA_01840	AMY1A	192.91/110.02/121	0/75.449/108.16	136.94	9.2519	-3.7501	2055.5	5241.4	1.7638	0.0099007	0.9901	0.019801	0.40702	FALSE
HGLibA_53189	USO1	162.45/45.958/90.104	27.666/0/24.894	87.635	4.0094	-4.1452	3670	3354.1	1.4439	0.0099047	0.9901	0.019809	0.40702	FALSE
HGLibA_51863	TSHZ1	2.0306/34.817/18.879	0/0/13.734	11.119	0.4172	-3.0961	352.21	425.55	0.51875	0.0099498	0.99005	0.0199	0.40828	FALSE
HGLibA_36846	PKNOX1	194.94/69.634/67.793	0/25.453/46.354	97.278	4.8146	-4.0791	5585.5	3723.2	1.5153	0.0099543	0.99005	0.019909	0.40832	FALSE
HGLibA_09198	CERKL	127.93/87.738/190.51	0/79.994/71.248	128.84	8.1984	-3.8192	2746.5	4931.1	1.718	0.0099591	0.99004	0.019918	0.40835	FALSE
HGLibA_48831	TCP1	82.239/19.497/0.85813	0/0/14.593	11.463	0.42768	-3.1259	2593.1	438.74	0.52685	0.0099612	0.99004	0.019922	0.40836	FALSE
HGLibB_07748	CCDC30	70.056/151.8/152.75	0/55.451/60.088	117.56	6.8407	-3.9185	2333.7	4499.5	1.6506	0.0099704	0.99003	0.019941	0.4086	FALSE
HGLibA_37735	POTEG	27.413/103.06/46.339	0/8.1812/8.5841	50.791	1.8302	-4.1937	1649.1	1944	1.1105	0.0099777	0.99002	0.019955	0.40882	FALSE
HGLibA_18897	GDPD3	112.7/52.922/73.799	38.244/0/9.4425	76.073	3.2198	-4.191	941.29	2911.6	1.3501	0.0099792	0.99002	0.019958	0.40882	FALSE
HGLibA_30268	MSTO1	155.34/164.34/193.94	39.057/2.7271/31.761	170.44	15.122	-3.4106	408.72	6523.3	1.923	0.009995	0.99001	0.01999	0.40926	FALSE
HGLibA_39127	PSMC1	36.551/32.031/62.644	1.6274/0/21.46	41.862	1.4501	-4.1288	278.36	1602.2	1.0096	0.010001	0.99	0.020002	0.40944	FALSE
HGLibA_50165	TMEM199	103.56/161.55/40.332	0/33.634/21.46	87.729	4.0742	-4.1282	3973.3	3357.8	1.4437	0.010054	0.98995	0.020108	0.41105	FALSE
HGLibB_06885	CACNA1F	336.06/342.6/483.99	133.45/141.81/60.088	381.96	104.38	-1.8615	7032.7	14619	2.2957	0.010063	0.98994	0.020125	0.41132	FALSE
HGLibA_28539	MBTPS2	128.94/64.063/90.104	0/19.09/44.637	90.629	4.3114	-4.1086	1087	3468.8	1.4656	0.010077	0.98992	0.020153	0.41156	FALSE
HGLibA_12117	CYP2C19	8.1224/0/32.609	0/1.8181/0	2.8961	0.16768	-1.7384	459.28	110.85	0.25915	0.010078	0.98992	0.020156	0.41156	FALSE
HGLibA_06840	CABIN1	237.58/86.346/107.27	0/65.45/95.283	130.08	8.4509	-3.7938	6994.8	4978.6	1.7238	0.010079	0.98992	0.020158	0.41156	FALSE
HGLibA_20894	HAUS8	103.56/129.52/107.27	0/46.36/59.23	112.89	6.4081	-3.9424	197.58	4320.9	1.6199	0.010106	0.98989	0.020212	0.41238	FALSE
HGLibB_51372	TRIM23	71.071/48.744/41.19	0/7.2722/11.159	52.258	1.9247	-4.1866	244.38	2000.1	1.1255	0.010122	0.98988	0.020244	0.41289	FALSE
HGLibB_11069	CRCP	29.444/44.566/3.4325	32.548/0/0	16.605	0.58857	-3.4702	560.07	635.53	0.63532	0.010142	0.98986	0.020284	0.4135	FALSE
HGLibB_02736	ARHGAP25	134.02/43.173/23.17	0/1.8181/40.345	51.206	1.8796	-4.1803	3854.3	1959.8	1.1142	0.010145	0.98985	0.020291	0.41358	FALSE
HGLibB_33339	OMD	19.291/133.7/3.4325	0/0/54.938	20.827	0.71951	-3.666	6522.2	797.14	0.71218	0.010157	0.98984	0.020314	0.41391	FALSE
HGLibA_43425	SEPSECS	218.29/84.953/72.083	57.772/0/42.062	110.17	6.1488	-3.9589	6888.2	4216.6	1.6019	0.010158	0.98984	0.020316	0.41391	FALSE
HGLibB_53080	URI1	100.51/64.063/41.19	0/14.544/12.876	64.257	2.5685	-4.1927	923.36	2459.4	1.2439	0.010225	0.98978	0.020449	0.41609	FALSE
HGLibA_35669	PCSK1N	367.54/253.47/268.6	10.578/119.08/147.65	292.49	57.189	-2.3345	3863	11195	2.2239	0.010256	0.98974	0.020511	0.41712	FALSE
HGLibA_03252	ASB8	230.47/154.59/117.56	46.38/0.90903/54.938	161.2	13.618	-3.472	3373.3	6169.8	1.8789	0.010264	0.98974	0.020527	0.41732	FALSE
HGLibA_36028	PEG10	12.184/84.953/51.488	0/0.90903/28.327	37.674	1.3208	-4.0586	1538	1441.9	0.95734	0.01028	0.98972	0.02056	0.41756	FALSE
HGLibA_40294	RARS2	37.566/32.031/21.453	0/14.544/0.85841	29.557	1.0196	-3.9194	67.968	1131.3	0.84846	0.01028	0.98972	0.02056	0.41756	FALSE
HGLibA_24413	KCTD10	110.67/41.78/170.77	0/36.361/27.469	92.447	4.5496	-4.0737	4516.7	3538.3	1.4777	0.010293	0.98971	0.020585	0.41787	FALSE
HGLibA_08523	CDC23	58.887/66.848/30.035	3.2548/0/20.602	49.088	1.8079	-4.1569	387.25	1878.8	1.0908	0.010296	0.9897	0.020592	0.41792	FALSE
HGLibA_42219	RQCD1	130.97/18.105/59.211	8.9506/0/9.4425	52.013	1.9517	-4.1667	3718.2	1990.7	1.122	0.010331	0.98967	0.020662	0.41856	FALSE
HGLibA_62896	hsa-mir-6511a-1	360.43/502.75/241.14	70.791/96.357/101.29	352.22	88.407	-1.9821	17534	13481	2.2722	0.010342	0.98966	0.020684	0.41888	FALSE
HGLibA_16690	FAM71B	194.94/122.56/54.062	0/19.09/125.33	108.92	6.1204	-3.9483	5297.2	4168.8	1.5921	0.010342	0.98966	0.020684	0.41888	FALSE
HGLibA_42706	SAMM50	143.16/220.04/132.15	0/127.26/204.3	160.87	13.657	-3.4652	2319.9	6157.1	1.8761	0.010354	0.98965	0.020709	0.4193	FALSE
HGLibB_26011	LARS2	97.469/103.06/40.332	12.205/29.089/0	74.005	3.1994	-4.1587	1264.2	2832.5	1.3304	0.010358	0.98964	0.020717	0.41939	FALSE
HGLibA_10698	COPB2	102.55/128.13/85.813	0/49.087/38.628	104.08	5.6539	-3.9812	457.11	3983.6	1.5595	0.010389	0.98961	0.020777	0.42052	FALSE
HGLibA_18629	GAREML	3.0459/0/9.4395	0/0/0	1.3424	0	-1.228	35.133	51.38	0.18728	0.0104	0.9896	0.0208	0.4208	FALSE
HGLibA_47015	SRP9	259.92/296.64/211.96	17.901/62.723/60.947	253.77	40.923	-2.6034	1811.9	9712.8	2.1597	0.010437	0.98956	0.020874	0.42184	FALSE
HGLibB_12978	DERL1	98.484/288.28/145.88	0.81369/98.175/29.186	160.6	13.703	-3.4583	10189	6147	1.8737	0.010441	0.98956	0.020882	0.42189	FALSE
HGLibB_48828	TDO2	0/80.775/18.021	0/0/4.292	5.1723	0.25282	-2.3006	2953.8	197.96	0.34964	0.010447	0.98955	0.020895	0.42207	FALSE
HGLibA_39970	RAB6A	282.25/210.29/154.46	5.6958/61.814/47.212	209.3	25.602	-2.9829	4165.1	8010.8	2.0524	0.010484	0.98952	0.020968	0.423	FALSE
HGLibA_58185	hsa-mir-2053	192.91/236.75/284.9	0.81369/166.35/263.53	235.21	34.126	-2.7494	2130.6	9002.3	2.1193	0.010514	0.98949	0.021028	0.42383	FALSE
HGLibB_42999	SCRN2	0/16.712/12.872	0/1.8181/0	2.6939	0.16768	-1.6615	153.68	103.11	0.24879	0.010542	0.98946	0.021084	0.42471	FALSE
HGLibA_40268	RAPSN	83.255/50.136/54.062	0/9.0903/18.027	60.884	2.454	-4.1632	331.25	2330.3	1.2104	0.010543	0.98946	0.021086	0.42471	FALSE
HGLibA_56266	ZNF568	38.581/103.06/83.239	0/19.09/14.593	69.181	2.9436	-4.1535	1140.8	2647.9	1.2872	0.010546	0.98945	0.021092	0.42476	FALSE
HGLibA_51252	TRAF3IP2	51.78/26.461/0	0/0/4.292	5.0651	0.25282	-2.2754	1332.9	193.86	0.34563	0.010596	0.9894	0.021191	0.42611	FALSE
HGLibA_07731	CCDC22	518.82/465.15/383.59	128.56/159.08/167.39	452.37	150.71	-1.5793	4655	17314	2.2925	0.010648	0.98935	0.021297	0.42773	FALSE
HGLibB_55042	ZDHHC23	83.255/122.56/82.381	26.852/0/45.495	94.376	4.8717	-4.0218	530.82	3612.2	1.4892	0.010659	0.98934	0.021319	0.42803	FALSE
HGLibA_17631	FLJ44313	46.704/123.95/66.076	0/34.543/10.301	72.598	3.2029	-4.1302	1674.9	2778.6	1.3165	0.010688	0.98931	0.021375	0.42902	FALSE
HGLibA_36302	PHACTR3	27.413/57.1/6.8651	0/0/72.964	22.114	0.80068	-3.6821	742.31	846.38	0.73259	0.010704	0.9893	0.021407	0.42946	FALSE
HGLibB_19358	GLYCTK	96.453/52.922/102.98	0/35.452/16.31	80.709	3.7784	-4.0959	757.93	3089.1	1.3842	0.010708	0.98929	0.021416	0.42948	FALSE
HGLibB_05720	C1GALT1	360.43/279.93/211.1	55.331/89.994/27.469	277.2	51.536	-2.4047	5652	10609	2.1908	0.01071	0.98929	0.02142	0.42948	FALSE
HGLibA_49500	TIMM13	57.872/33.424/57.495	0/4.5451/15.451	48.093	1.8331	-4.1151	199.6	1840.7	1.0782	0.010718	0.98928	0.021436	0.42956	FALSE
HGLibB_06897	CACNA1S	93.408/146.23/137.3	0/94.539/56.655	123.32	8.0287	-3.7834	807.55	4720	1.6781	0.010723	0.98928	0.021445	0.42956	FALSE
HGLibA_31129	NAPB	17.26/1.3927/0	0/0/0	1.2735	0	-1.1849	128.6	48.743	0.18241	0.010723	0.98928	0.021446	0.42956	FALSE
HGLibA_31509	NDUFB11	145.19/89.131/108.12	99.27/0/30.903	111.85	6.6539	-3.8821	820.72	4281	1.6078	0.010729	0.98927	0.021457	0.42966	FALSE
HGLibA_32980	NUDT4	34.52/4.178/24.886	0/31.816/0	15.368	0.58339	-3.3698	291.31	588.18	0.6096	0.010736	0.98926	0.021471	0.42985	FALSE
HGLibA_20558	GTF2H4	224.38/59.885/77.232	0/49.996/36.053	101.26	5.5578	-3.9629	8724.1	3875.6	1.5373	0.010755	0.98924	0.021511	0.43044	FALSE
HGLibA_44888	SLC2A7	137.07/150.41/102.12	0/89.085/76.398	128.17	8.7033	-3.7346	626.22	4905.4	1.7057	0.010767	0.98923	0.021534	0.43076	FALSE
HGLibB_04737	BPTF	362.46/211.69/232.55	5.6958/150.9/103.87	261.31	44.877	-2.5154	6760.5	10002	2.1642	0.010784	0.98922	0.021569	0.43117	FALSE
HGLibB_01939	ANK3	141.13/114.2/116.71	0/35.452/154.51	123.44	8.0916	-3.7748	221.78	4724.6	1.6782	0.010793	0.98921	0.021585	0.43139	FALSE
HGLibA_50261	TMEM232	93.408/114.2/64.36	21.156/42.724/0	88.22	4.3984	-4.0468	635.56	3376.5	1.4425	0.010794	0.98921	0.021587	0.43139	FALSE
HGLibA_51715	TRO	45.688/4.178/28.318	0/43.633/0	17.623	0.65905	-3.4886	541.42	674.5	0.65318	0.010796	0.9892	0.021591	0.43139	FALSE
HGLibB_08892	CDX2	129.96/160.16/180.21	5.6958/10.908/36.053	155.37	13.113	-3.4699	642.78	5946.8	1.8448	0.01081	0.98919	0.021621	0.43167	FALSE
HGLibA_55526	ZNF174	229.46/151.8/81.523	61.841/0/205.16	141.62	10.733	-3.6035	5715.5	5420.3	1.7778	0.01081	0.98919	0.02162	0.43167	FALSE
HGLibA_29980	MRPL41	9.1377/0/2.5744	0/0/0	1.2519	0	-1.1711	32.751	47.914	0.18085	0.01083	0.98917	0.02166	0.43211	FALSE
HGLibA_63878	hsa-mir-7162	33.505/20.89/0	3.2548/0/0	4.0318	0.22252	-2.0412	584.56	154.31	0.30665	0.010839	0.98916	0.021679	0.43235	FALSE
HGLibA_46732	SPNS1	35.535/101.67/63.502	0/7.2722/24.894	61.227	2.5413	-4.1352	1150.2	2343.4	1.2123	0.010843	0.98916	0.021686	0.43243	FALSE
HGLibA_51351	TREH	56.857/26.461/3.4325	0/0/42.92	17.383	0.6549	-3.4736	917.59	665.33	0.64854	0.010856	0.98914	0.021712	0.43268	FALSE
HGLibA_51627	TRIO	1.0153/136.48/22.311	0/30.907/0	14.957	0.57684	-3.3391	7508.3	572.48	0.60103	0.010857	0.98914	0.021715	0.43268	FALSE
HGLibB_28315	MARCKS	358.4/334.24/293.48	41.498/96.357/113.31	327.59	76.816	-2.0782	1078.4	12538	2.2396	0.010858	0.98914	0.021717	0.43268	FALSE
HGLibA_63440	hsa-mir-6816	113.71/121.16/141.59	0/107.27/55.796	124.95	8.3349	-3.7541	208.78	4782.4	1.6863	0.010858	0.98914	0.021717	0.43268	FALSE
HGLibB_41385	RNASEK	63.964/32.031/45.481	13.833/0/4.292	45.34	1.7291	-4.0858	261.99	1735.4	1.0469	0.010867	0.98913	0.021734	0.43287	FALSE
HGLibA_57153	hsa-mir-101-1	72.086/194.97/171.63	0/140.9/65.239	134.12	9.6304	-3.668	4478.9	5133.5	1.7376	0.010871	0.98913	0.021743	0.43287	FALSE
HGLibA_48043	SYS1	333.02/545.93/222.26	82.997/126.35/59.23	343.16	85.327	-1.9952	27918	13134	2.2498	0.010872	0.98913	0.021744	0.43287	FALSE
HGLibB_52452	UBA2	53.811/107.24/78.09	29.293/0/16.31	76.67	3.5401	-4.0966	729.41	2934.5	1.35	0.010879	0.98912	0.021758	0.43307	FALSE
HGLibB_03082	ARPC3	68.025/112.81/108.12	0/26.362/48.071	93.97	4.9327	-4.0007	614.16	3596.6	1.4847	0.010887	0.98911	0.021774	0.4333	FALSE
HGLibA_43942	SH3D21	50.765/0/34.325	0/0/5.1504	5.4946	0.27445	-2.3494	1455.4	210.3	0.35997	0.010889	0.98911	0.021779	0.43333	FALSE
HGLibB_49609	TLX1	8.1224/34.817/6.0069	0/0/19.743	11.958	0.48327	-3.127	286.32	457.69	0.53637	0.010896	0.9891	0.021791	0.43351	FALSE
HGLibA_18800	GCM1	47.719/0/18.021	0/3.6361/0	4.3251	0.2343	-2.1091	1044.7	165.54	0.31795	0.010903	0.9891	0.021806	0.43372	FALSE
HGLibA_62877	hsa-mir-6507	192.91/115.59/123.57	0/66.359/183.7	140.2	10.59	-3.6068	1830.1	5365.9	1.7693	0.010906	0.98909	0.021812	0.43373	FALSE
HGLibB_36126	PFN1	91.377/158.76/150.17	0/87.267/86.699	129.64	9.0191	-3.7048	1367	4961.8	1.7124	0.010919	0.98908	0.021837	0.43393	FALSE
HGLibA_25820	KRTAP6-3	73.102/160.16/102.98	0/33.634/72.964	106.44	6.1699	-3.9054	2004.6	4073.8	1.5709	0.010922	0.98908	0.021845	0.43399	FALSE
HGLibB_20616	GUCA2A	0/236.75/0	0/0/0	1.233	0	-1.159	27737	47.192	0.17948	0.010925	0.98907	0.021851	0.43404	FALSE
HGLibA_10058	CLK2	100.51/82.168/18.021	1.6274/0/63.522	53.032	2.1233	-4.1127	2164.6	2029.7	1.13	0.010979	0.98902	0.021958	0.4356	FALSE
HGLibA_08717	CDIPT	231.49/59.885/48.055	0/44.542/20.602	87.358	4.4212	-4.0267	11536	3343.6	1.4343	0.011041	0.98896	0.022081	0.43752	FALSE
HGLibB_56575	ZNF729	3.0459/2.7853/18.021	0/0/5.1504	5.3791	0.27445	-2.3235	85.992	205.88	0.35576	0.011048	0.98895	0.022095	0.43759	FALSE
HGLibB_20828	HARS	55.841/33.424/64.36	0/8.1812/10.301	49.346	1.9498	-4.0932	260.56	1888.7	1.0906	0.01105	0.98895	0.0221	0.43761	FALSE
HGLibB_25647	KRTAP19-8	83.255/83.56/114.99	0/26.362/47.212	92.831	4.9026	-3.9906	334.33	3553	1.4751	0.011059	0.98894	0.022117	0.43785	FALSE
HGLibB_43259	SELT	0/57.1/31.751	0/5.4542/0	5.569	0.28154	-2.3578	1686	213.15	0.36216	0.01107	0.98893	0.022139	0.43809	FALSE
HGLibB_12663	DDX24	308.65/199.15/171.63	5.6958/41.815/110.73	219.32	29.872	-2.8352	5330.6	8394.4	2.0678	0.011086	0.98891	0.022172	0.43838	FALSE
HGLibB_28567	MCM3	112.7/25.068/39.474	0/9.0903/8.5841	48.153	1.8984	-4.0839	2387.2	1843	1.0774	0.011092	0.98891	0.022183	0.43846	FALSE
HGLibA_04504	BIK	0/1.3927/14.588	0/0/0	1.1991	0	-1.1369	90.372	45.895	0.177	0.011102	0.9889	0.022205	0.43881	FALSE
HGLibA_36672	PILRB	64.979/140.66/43.765	0/29.089/14.593	73.693	3.4003	-4.0853	2728.1	2820.5	1.3236	0.011111	0.98889	0.022222	0.43901	FALSE
HGLibB_12525	DCT	62.949/64.063/65.218	0/18.181/12.876	64.07	2.7733	-4.1081	1.2879	2452.2	1.2378	0.011116	0.98888	0.022232	0.43913	FALSE
HGLibB_20289	GRINA	169.55/197.76/70.367	0/68.177/137.34	133.14	9.6904	-3.6494	4721.1	5095.8	1.7294	0.011135	0.98886	0.022271	0.43961	FALSE
HGLibA_05238	C12orf40	94.423/101.67/85.813	57.772/0/23.177	93.742	5.0262	-3.9747	63.051	3587.9	1.4811	0.011156	0.98884	0.022312	0.4402	FALSE
HGLibA_63704	hsa-mir-6880	69.04/51.529/36.042	0/13.635/6.8672	50.429	2.0231	-4.0885	277.29	1930.1	1.1018	0.011159	0.98884	0.022319	0.44024	FALSE
HGLibB_21794	HNRNPH1	193.92/36.209/34.325	0/13.635/15.451	62.261	2.6746	-4.1057	9396.8	2383	1.2206	0.011161	0.98884	0.022321	0.44024	FALSE
HGLibA_61445	hsa-mir-500a	145.19/82.168/123.57	0/51.814/72.964	113.81	7.1388	-3.8183	1040.5	4356.1	1.6163	0.011176	0.98882	0.022352	0.44064	FALSE
HGLibA_01988	ANKRD1	283.27/119.77/42.049	0/49.996/71.248	112.61	6.9968	-3.8285	17078	4309.9	1.6087	0.011176	0.98882	0.022353	0.44064	FALSE
HGLibB_51112	TPR	59.903/34.817/0	0/0/6.0088	5.8393	0.29384	-2.4022	1898.3	223.49	0.37094	0.011186	0.98881	0.022372	0.44096	FALSE
HGLibB_38146	PPP3R1	32.49/94.702/36.042	0/5.4542/14.593	48.054	1.9133	-4.0737	1281.3	1839.2	1.0759	0.01121	0.98879	0.02242	0.44167	FALSE
HGLibA_14346	EBAG9	102.55/103.06/90.104	0/96.357/18.027	98.382	5.4918	-3.9363	53.86	3765.5	1.5138	0.011215	0.98879	0.022429	0.44171	FALSE
HGLibA_56944	ZNRF3	145.19/90.524/50.63	25.224/38.179/0	87.313	4.4938	-4.0068	2352.7	3341.8	1.4327	0.011242	0.98876	0.022485	0.44251	FALSE
HGLibA_33298	OFD1	173.62/162.94/211.1	0/319.07/226.62	181.43	19.242	-3.1719	641.6	6944	1.9463	0.011243	0.98876	0.022485	0.44251	FALSE
HGLibA_47000	SRP14	172.6/116.98/57.495	39.057/63.632/0	105.11	6.1959	-3.8823	3481.6	4023	1.5595	0.011246	0.98875	0.022492	0.44251	FALSE
HGLibA_53696	VMP1	33.505/0/22.311	0/3.6361/0	4.123	0.2343	-2.0533	605.56	157.81	0.30956	0.01125	0.98875	0.0225	0.44259	FALSE
HGLibA_34549	OR8K5	130.97/45.958/104.69	0/38.179/23.177	85.745	4.3665	-4.0147	1993.8	3281.8	1.4205	0.011254	0.98875	0.022508	0.44262	FALSE
HGLibA_58818	hsa-mir-3180-5	0/45.958/70.367	0/0/7.7257	6.7722	0.32773	-2.5494	2812.8	259.2	0.40029	0.011259	0.98874	0.022519	0.44267	FALSE
HGLibB_11298	CSB-PGBD3	28.428/15.319/23.17	0.81369/0/8.5841	21.613	0.82578	-3.6305	44.242	827.2	0.72274	0.011281	0.98872	0.022562	0.44323	FALSE
HGLibB_40966	RGMB	96.453/84.953/133.87	0/109.99/20.602	103.13	6.0083	-3.8932	659.91	3947.3	1.5459	0.011289	0.98871	0.022578	0.44348	FALSE
HGLibA_59694	hsa-mir-422a	26.398/114.2/64.36	0/9.0903/18.027	57.912	2.454	-4.0922	2101.5	2216.5	1.1779	0.01131	0.98869	0.02262	0.44393	FALSE
HGLibB_21778	HNRNPC	0/65.456/15.446	0/0/4.292	4.571	0.25282	-2.1528	1923	174.95	0.32647	0.011346	0.98865	0.022692	0.44493	FALSE
HGLibB_18859	GDI2	357.39/285.5/188.79	79.742/24.544/60.947	268.07	49.24	-2.4211	7283.3	10260	2.1604	0.011352	0.98865	0.022703	0.44493	FALSE
HGLibA_32624	NR4A1	61.933/16.712/44.623	0/3.6361/8.5841	35.896	1.3804	-3.9542	561.06	1373.9	0.9312	0.011352	0.98865	0.022705	0.44493	FALSE
HGLibB_08501	CDC123	0/110.02/47.197	0/0/10.301	7.9458	0.37028	-2.7067	6011.6	304.12	0.4344	0.011355	0.98865	0.022709	0.44495	FALSE
HGLibB_20740	H2AFZ	171.59/84.953/72.083	0/108.17/19.743	101.67	5.8894	-3.8975	3021.5	3891.3	1.5354	0.011357	0.98864	0.022714	0.44498	FALSE
HGLibA_54406	WRB	81.224/69.634/67.793	20.342/20.908/0	72.649	3.4019	-4.0645	53.104	2780.6	1.3132	0.011368	0.98863	0.022737	0.44534	FALSE
HGLibB_21147	HERPUD2	216.26/107.24/81.523	0/44.542/143.35	123.66	8.5196	-3.7109	5310	4732.9	1.6736	0.011382	0.98862	0.022765	0.44552	FALSE
HGLibA_03899	AVPI1	10.153/0/11.156	1.6274/0/0	2.1598	0.1585	-1.4476	74.741	82.665	0.22012	0.011408	0.98859	0.022816	0.44623	FALSE
HGLibB_02435	APLNR	69.04/0/48.055	0/8.1812/0	6.8309	0.33588	-2.5514	2808.1	261.45	0.40169	0.01147	0.98853	0.022941	0.44809	FALSE
HGLibA_55200	ZFP30	18.275/0/6.8651	0/0/1.7168	2.2391	0.16289	-1.4779	141.79	85.701	0.22428	0.01147	0.98853	0.022941	0.44809	FALSE
HGLibB_04931	BTF3	320.83/469.33/314.08	71.605/111.81/117.6	361.63	98.015	-1.8728	7762.4	13841	2.2407	0.011477	0.98852	0.022955	0.44822	FALSE
HGLibB_03755	ATP6V1G1	28.428/137.87/0	0/9.0903/0	7.2287	0.35128	-2.6063	8785	276.67	0.41347	0.011527	0.98847	0.023053	0.44983	FALSE
HGLibB_27378	LRRC71	52.796/45.958/96.111	7.3232/29.998/0	61.557	2.7165	-4.0732	757.03	2356	1.2122	0.011528	0.98847	0.023056	0.44983	FALSE
HGLibB_01287	AHCYL1	0/30.639/27.46	4.0685/0/0	4.2919	0.24673	-2.0856	624.67	164.27	0.31562	0.011541	0.98846	0.023082	0.44999	FALSE
HGLibB_53337	USP6	92.392/123.95/122.71	0/112.72/33.478	112.01	7.1357	-3.7961	320.96	4287.1	1.6017	0.011543	0.98846	0.023087	0.44999	FALSE
HGLibA_19492	GNB2L1	95.438/72.419/193.08	0/62.723/54.938	110.1	6.9188	-3.8105	4260.1	4214.1	1.5895	0.011558	0.98844	0.023115	0.4503	FALSE
HGLibA_15436	ERCC3	0/36.209/36.9	0/0/5.1504	5.0216	0.27445	-2.2403	1007.1	192.2	0.34242	0.011572	0.98843	0.023144	0.45057	FALSE
HGLibB_21292	HINFP	59.903/91.916/46.339	0/24.544/10.301	63.429	2.8484	-4.0654	558.01	2427.7	1.2295	0.011597	0.9884	0.023194	0.45113	FALSE
HGLibB_21368	HIST1H2AI	220.32/281.32/101.26	0.81369/60.905/157.09	184.47	20.516	-3.1077	8794.6	7060.4	1.9512	0.011611	0.98839	0.023221	0.45158	FALSE
HGLibA_30026	MRPL9	57.872/175.48/159.61	99.27/0/50.646	117.48	7.8595	-3.7413	4345.9	4496.5	1.6348	0.011623	0.98838	0.023246	0.45191	FALSE
HGLibA_55390	ZMYM1	86.3/79.382/67.793	0/28.18/21.46	77.442	3.8359	-4.0198	87.675	2964	1.352	0.011643	0.98836	0.023286	0.45253	FALSE
HGLibA_30034	MRPS12	106.61/116.98/127.86	0/82.721/59.23	116.83	7.7911	-3.7445	113.12	4471.5	1.6306	0.011648	0.98835	0.023295	0.45265	FALSE
HGLibB_42077	RPS28	88.331/0/28.318	0/7.2722/0	6.2106	0.31931	-2.4503	3635.6	237.7	0.38211	0.011653	0.98835	0.023306	0.45271	FALSE
HGLibA_52666	UBE2V1	55.841/51.529/38.616	0/20.908/4.292	48.077	1.9974	-4.0333	80.857	1840.1	1.0742	0.011708	0.98829	0.023416	0.45438	FALSE
HGLibA_47734	SULT1A2	114.73/155.98/34.325	0/69.086/13.734	85.032	4.4743	-3.9741	4243.3	3254.5	1.4121	0.011715	0.98828	0.02343	0.45453	FALSE
HGLibA_61033	hsa-mir-4734	26.398/8.356/6.8651	21.97/0/0	11.499	0.50432	-3.0547	126.66	440.13	0.52409	0.011729	0.98827	0.023457	0.45484	FALSE
HGLibA_39185	PSMD8	157.37/83.56/64.36	0/47.269/34.336	94.597	5.3639	-3.909	2488.4	3620.6	1.483	0.011761	0.98824	0.023521	0.45585	FALSE
HGLibA_62815	hsa-mir-643	35.535/5.5707/12.014	30.107/0/0	13.377	0.57097	-3.1941	276.89	512	0.56596	0.011781	0.98822	0.023561	0.45639	FALSE
HGLibB_00670	ACTR6	319.82/278.53/162.19	23.597/90.903/30.044	243.56	40.108	-2.5727	6830.1	9322.1	2.1072	0.011794	0.98821	0.023589	0.45667	FALSE
HGLibB_53416	UXT	237.58/328.67/183.64	23.597/26.362/102.15	242.95	39.925	-2.5756	5447.2	9298.7	2.1054	0.01182	0.98818	0.023639	0.45728	FALSE
HGLibA_04068	BACH2	99.499/73.812/59.211	0/9.0903/62.664	75.764	3.7638	-4.0103	420.59	2899.8	1.3371	0.011824	0.98818	0.023647	0.45733	FALSE
HGLibA_57073	ZXDA	95.438/69.634/49.772	0/26.362/14.593	69.161	3.2877	-4.0324	533.32	2647.1	1.2803	0.011836	0.98816	0.023672	0.45774	FALSE
HGLibA_38182	PPP2R5E	49.75/83.56/25.744	0/5.4542/16.31	47.49	1.9888	-4.02	889.54	1817.6	1.0673	0.011839	0.98816	0.023678	0.45777	FALSE
HGLibA_04384	BDKRB2	47.719/72.419/49.772	0/30.907/5.1504	55.615	2.4345	-4.043	189.43	2128.6	1.1527	0.011857	0.98814	0.023715	0.45806	FALSE
HGLibA_50000	TMEM151A	148.23/71.026/38.616	0/8.1812/63.522	74.097	3.6489	-4.0138	3382.3	2836	1.3229	0.011858	0.98814	0.023717	0.45806	FALSE
HGLibA_10933	CPLX1	37.566/77.99/33.467	4.0685/0/19.743	46.119	1.9224	-4.0111	624.48	1765.2	1.052	0.01186	0.98814	0.023719	0.45806	FALSE
HGLibB_28734	MED21	70.056/55.707/88.388	34.175/0/12.018	70.134	3.3631	-4.0271	270.67	2684.3	1.2888	0.011863	0.98814	0.023727	0.45813	FALSE
HGLibB_50472	TMEM87A	42.643/0/13.73	0/3.6361/0	3.7955	0.2343	-1.958	811.1	145.27	0.29547	0.011871	0.98813	0.023741	0.45816	FALSE
HGLibB_50892	TOMM20	48.734/37.602/29.177	0/44.542/0.85841	37.675	1.5234	-3.9379	97.27	1442	0.95202	0.011887	0.98811	0.023774	0.45852	FALSE
HGLibA_20842	HAPLN1	82.239/75.204/56.637	0/54.542/7.7257	70.493	3.3969	-4.0233	176.08	2698.1	1.2917	0.011894	0.98811	0.023788	0.45857	FALSE
HGLibB_48542	TBK1	55.841/263.22/108.98	0/49.996/104.73	117.03	7.9679	-3.7182	12590	4479.1	1.6295	0.011897	0.9881	0.023794	0.45857	FALSE
HGLibA_29073	MFN2	113.71/20.89/46.339	0/7.2722/12.876	47.95	2.0228	-4.0174	2529.8	1835.3	1.0721	0.011901	0.9881	0.023801	0.45857	FALSE
HGLibA_62717	hsa-mir-619	19.291/19.497/5.1488	26.852/0/0	12.488	0.54595	-3.1251	74.637	477.96	0.54623	0.011902	0.9881	0.023804	0.45857	FALSE
HGLibA_43246	SEC61A1	142.14/75.204/23.17	0/12.726/20.602	62.833	2.8833	-4.0389	4008.1	2404.9	1.2225	0.011906	0.98809	0.023812	0.45859	FALSE
HGLibA_13272	DIS3	10.153/20.89/9.4395	0/0/27.469	12.61	0.55084	-3.1335	42.326	482.62	0.54891	0.011917	0.98808	0.023833	0.45877	FALSE
HGLibA_63246	hsa-mir-6770-1	1003.1/745.08/939.66	514.25/402.7/508.18	888.88	472.13	-0.91138	18153	34021	2.2595	0.011927	0.98807	0.023854	0.45888	FALSE
HGLibB_46907	SRFBP1	26.398/43.173/13.73	0/7.2722/1.7168	25.024	1.0023	-3.7001	229.41	957.76	0.77619	0.011939	0.98806	0.023878	0.45926	FALSE
HGLibB_17409	FGFBP3	70.056/84.953/134.73	0/18.181/84.982	92.906	5.2779	-3.9029	1167.2	3555.9	1.4695	0.011945	0.98805	0.02389	0.45935	FALSE
HGLibA_28393	MASP1	97.469/169.91/61.786	0/29.089/80.69	100.78	6.0781	-3.8459	3155.1	3857.1	1.5248	0.01195	0.98805	0.0239	0.45946	FALSE
HGLibB_09582	CHRNB2	147.22/115.59/202.52	0/109.08/230.05	151.05	13.495	-3.3909	1960.5	5781.4	1.8091	0.012016	0.98798	0.024031	0.46147	FALSE
HGLibA_08064	CCNB2	104.58/126.73/125.29	0/56.36/102.15	118.42	8.2266	-3.6941	153.97	4532.3	1.6368	0.01202	0.98798	0.024041	0.46158	FALSE
HGLibB_53509	VCP	21.321/23.675/17.163	8.1369/0.90903/0	20.539	0.8402	-3.549	10.924	786.12	0.70259	0.012032	0.98797	0.024063	0.46186	FALSE
HGLibB_05232	C12orf4	130.97/107.24/138.16	0/90.903/85.841	124.73	9.1133	-3.636	262.69	4773.9	1.6733	0.012039	0.98796	0.024079	0.46208	FALSE
HGLibA_17452	FGFRL1	17.26/43.173/10.298	4.0685/0/1.7168	19.741	0.81151	-3.5172	322.19	755.57	0.68866	0.012042	0.98796	0.024084	0.46212	FALSE
HGLibA_25710	KRTAP21-2	53.811/47.351/16.305	0/12.726/2.5752	34.651	1.4083	-3.8878	432.5	1326.2	0.91282	0.012047	0.98795	0.024095	0.46224	FALSE
HGLibB_02623	ARAP1	129.96/41.78/63.502	0/8.1812/52.363	70.133	3.4155	-4.0099	2213.5	2684.3	1.2877	0.012056	0.98794	0.024113	0.46235	FALSE
HGLibB_47908	SYNCRIP	41.627/36.209/0	0/0/6.0088	5.2311	0.29384	-2.2678	1155.9	200.21	0.34893	0.012056	0.98794	0.024113	0.46235	FALSE
HGLibA_35634	PCNA	38.581/0/35.183	5.6958/0/0	5.0486	0.287	-2.2326	1029	193.23	0.34254	0.012059	0.98794	0.024119	0.46235	FALSE
HGLibA_16211	FAM160B1	236.56/86.346/87.53	0/58.178/115.03	121.38	8.6544	-3.6641	7820.3	4645.8	1.6539	0.01206	0.98794	0.02412	0.46235	FALSE
HGLibA_34159	OR52E4	106.61/69.634/176.78	68.35/0/54.938	109.49	7.1224	-3.7659	3062.1	4190.6	1.5813	0.012064	0.98794	0.024129	0.46245	FALSE
HGLibA_22362	HTR1D	44.673/155.98/79.806	0/27.271/32.619	82.247	4.374	-3.9533	3427.1	3147.9	1.388	0.012103	0.9879	0.024206	0.46371	FALSE
HGLibB_42556	SAA1	1.0153/27.853/20.595	0/13.635/0	8.541	0.41596	-2.7524	287.45	326.9	0.44939	0.012107	0.98789	0.024214	0.46378	FALSE
HGLibB_44550	SLC22A9	106.61/83.56/86.671	0/39.997/37.77	91.739	5.235	-3.8947	156.8	3511.2	1.4598	0.012115	0.98789	0.024229	0.46385	FALSE
HGLibB_10514	COL18A1	18.275/0/13.73	0/0/2.5752	2.84	0.19908	-1.6792	182.45	108.7	0.25331	0.012117	0.98788	0.024233	0.46385	FALSE
HGLibB_42852	SCG5	65.994/116.98/205.09	0/49.087/109.88	116.57	8.048	-3.6997	5197.4	4461.4	1.6247	0.012129	0.98787	0.024258	0.46426	FALSE
HGLibB_20557	GTF3C3	180.72/257.64/327.81	13.833/51.814/109.02	248.06	42.795	-2.5077	5492.8	9494.3	2.1066	0.012191	0.98781	0.024382	0.46588	FALSE
HGLibA_35594	PCGF2	68.025/306.39/190.51	0/172.71/205.16	158.37	15.151	-3.3027	15552	6061.5	1.8396	0.012205	0.9878	0.024409	0.46625	FALSE
HGLibA_53110	UQCRB	62.949/55.707/118.42	15.46/38.179/0	74.612	3.8053	-3.9759	1206.4	2855.7	1.325	0.012257	0.98774	0.024513	0.46779	FALSE
HGLibB_12235	CYTIP	72.086/0/34.325	8.1369/0/0	6.187	0.3351	-2.4284	2586.4	236.8	0.38028	0.012264	0.98774	0.024528	0.46793	FALSE
HGLibB_28824	MEIG1	112.7/116.98/45.481	0/33.634/30.903	84.336	4.6115	-3.9267	1690	3227.9	1.4032	0.012267	0.98773	0.024533	0.46795	FALSE
HGLibB_26206	LDLRAD2	128.94/96.094/58.353	0/11.817/119.32	89.759	5.121	-3.8902	1280.9	3435.5	1.444	0.012303	0.9877	0.024606	0.46911	FALSE
HGLibB_40805	RERE	2.0306/50.136/10.298	0/19.999/0	10.263	0.48576	-2.9223	828.82	392.81	0.49332	0.012333	0.98767	0.024665	0.47002	FALSE
HGLibB_45734	SMNDC1	64.979/231.18/108.98	0/74.54/80.69	117.87	8.3484	-3.6685	7858.1	4511.5	1.6306	0.012337	0.98766	0.024675	0.47012	FALSE
HGLibB_31202	NBPF9	98.484/20.89/52.346	0/11.817/8.5841	47.599	2.0792	-3.9803	1662.6	1821.8	1.0665	0.012355	0.98764	0.024711	0.47062	FALSE
HGLibB_26890	LOC389895	106.61/103.06/142.45	0/79.994/69.531	116.1	8.1313	-3.6808	477.26	4443.8	1.6197	0.01237	0.98763	0.024741	0.471	FALSE
HGLibB_45784	SMU1	76.147/33.424/56.637	7.3232/0/19.743	52.439	2.3513	-3.9951	470.64	2007.1	1.118	0.012377	0.98762	0.024753	0.47109	FALSE
HGLibB_11187	CRLS1	86.3/65.456/147.6	0/51.814/35.195	94.125	5.5798	-3.8537	1871.3	3602.6	1.4752	0.012381	0.98762	0.024761	0.47117	FALSE
HGLibA_52009	TSSK1B	83.255/194.97/156.18	0/86.357/166.53	136.36	11.194	-3.4937	3324.3	5219.1	1.7326	0.012407	0.98759	0.024814	0.47188	FALSE
HGLibB_15737	EXOC7	498.51/532/556.93	293.74/236.35/133.05	528.6	209.83	-1.3289	859.67	20232	2.2411	0.012409	0.98759	0.024817	0.47188	FALSE
HGLibB_12657	DDX21	136.05/105.84/53.204	0/29.089/54.938	91.512	5.3362	-3.868	1828.3	3502.5	1.4561	0.01242	0.98758	0.02484	0.47214	FALSE
HGLibA_64229	hsa-mir-888	0/47.351/20.595	0/0/5.1504	4.5136	0.27445	-2.1131	1057	172.75	0.32252	0.012424	0.98758	0.024848	0.47215	FALSE
HGLibB_41296	RLIM	74.117/83.56/18.879	2.4411/0/45.495	48.927	2.1628	-3.9805	1368.5	1872.6	1.0806	0.012425	0.98757	0.02485	0.47215	FALSE
HGLibA_14603	EFNB3	121.84/100.27/81.523	0/42.724/58.372	99.866	6.203	-3.8077	409.66	3822.3	1.515	0.012427	0.98757	0.024855	0.47215	FALSE
HGLibB_37554	POLR2L	211.18/73.812/27.46	0/23.635/27.469	75.401	3.9297	-3.954	10369	2885.9	1.3304	0.012466	0.98753	0.024933	0.47323	FALSE
HGLibA_61902	hsa-mir-548am	1.0153/11.141/0	0/0/0	0.97829	0	-0.98426	52.123	37.443	0.15988	0.012475	0.98753	0.024949	0.47336	FALSE
HGLibB_36751	PKD2	73.102/34.817/45.481	0/3.6361/30.903	48.74	2.1626	-3.9752	398.98	1865.5	1.0784	0.012484	0.98752	0.024969	0.47345	FALSE
HGLibB_22123	HSBP1	684.31/637.84/483.99	271.77/261.8/239.5	595.57	257.33	-1.2075	11056	22795	2.2403	0.012496	0.9875	0.024992	0.47375	FALSE
HGLibB_46007	SNX21	38.581/6.9634/29.177	85.438/0/0	19.899	0.84926	-3.4984	301.22	761.62	0.69028	0.012518	0.98748	0.025036	0.4742	FALSE
HGLibB_32939	NUDT5	219.3/123.95/135.59	0/243.62/132.19	154.47	14.673	-3.3102	2745.9	5912.2	1.8181	0.012531	0.98747	0.025062	0.47449	FALSE
HGLibA_29017	METTL7A	62.949/47.351/16.305	0/6.3632/6.8672	36.512	1.5513	-3.878	612.35	1397.5	0.93522	0.012545	0.98745	0.02509	0.47478	FALSE
HGLibA_40189	RAN	0/12.534/0.85813	0/0/0	0.96575	0	-0.97508	67.385	36.963	0.15885	0.012566	0.98743	0.025133	0.47529	FALSE
HGLibA_36071	PET112	159.4/72.419/97.827	52.076/0/61.805	104.14	6.7612	-3.7599	2050	3985.9	1.5424	0.012588	0.98741	0.025175	0.47586	FALSE
HGLibA_05274	C12orf60	87.316/165.73/96.111	0/94.539/49.788	111.63	7.6867	-3.6966	1879.4	4272.4	1.5902	0.012611	0.98739	0.025223	0.47646	FALSE
HGLibB_15740	EXOC8	143.16/245.11/141.59	43.939/27.271/5.1504	170.64	18.397	-3.1455	3572.5	6531.1	1.8838	0.012648	0.98735	0.025296	0.47746	FALSE
HGLibB_01297	AHI1	56.857/33.424/88.388	0/30.907/6.0088	55.183	2.5657	-3.9779	789.4	2112.1	1.1449	0.01265	0.98735	0.0253	0.47748	FALSE
HGLibB_08554	CDC42BPB	123.87/36.209/45.481	0/12.726/18.885	58.88	2.7985	-3.9786	2458.4	2253.6	1.1814	0.01266	0.98734	0.025319	0.47775	FALSE
HGLibA_22075	HRASLS	121.84/0/64.36	0/17.271/0	9.1287	0.45797	-2.7964	7918.4	349.39	0.46387	0.012696	0.9873	0.025392	0.47853	FALSE
HGLibA_29724	MPHOSPH10	141.13/154.59/75.516	0/100.9/65.239	118.11	8.6063	-3.6322	1837.3	4520.6	1.6287	0.012706	0.98729	0.025412	0.47882	FALSE
HGLibA_30520	MUC1	89.346/33.424/25.744	0/17.271/4.292	42.534	1.8686	-3.9237	1278.1	1628	1.0079	0.012714	0.98729	0.025428	0.47892	FALSE
HGLibA_24532	KDM6A	547.25/387.16/214.53	113.92/59.996/144.21	356.89	99.526	-1.8319	28709	13660	2.2021	0.012715	0.98729	0.025429	0.47892	FALSE
HGLibB_44698	SLC25A45	0/20.89/25.744	4.0685/0/0	3.6855	0.24673	-1.9101	398.08	141.06	0.28954	0.012741	0.98726	0.025483	0.47973	FALSE
HGLibA_40023	RABIF	311.7/420.59/163.9	71.605/32.725/80.69	278.02	57.405	-2.2562	17241	10641	2.1387	0.012759	0.98724	0.025517	0.48003	FALSE
HGLibB_43861	SH3BGR	22.337/58.492/43.765	0/9.0903/6.0088	38.534	1.6773	-3.8842	344.02	1474.9	0.95972	0.01278	0.98722	0.025561	0.48033	FALSE
HGLibA_58672	hsa-mir-3153	52.796/37.602/28.318	8.9506/0/6.0088	38.312	1.6683	-3.881	155.08	1466.3	0.95692	0.012794	0.98721	0.025589	0.48043	FALSE
HGLibA_47201	SSX2B	263.98/412.23/399.89	38.244/139.99/169.96	351.74	96.93	-1.8488	6839.9	13462	2.1961	0.012841	0.98716	0.025683	0.48143	FALSE
HGLibB_25294	KMT2D	391.91/382.98/670.2	189.59/224.53/112.45	465.08	168.54	-1.459	27085	17800	2.2226	0.012878	0.98712	0.025756	0.48226	FALSE
HGLibA_42889	SCEL	70.056/69.634/84.097	0/51.814/12.876	74.305	3.9689	-3.9217	67.882	2843.9	1.3189	0.012894	0.98711	0.025789	0.48255	FALSE
HGLibB_14852	ELAC2	76.147/68.241/24.886	0/6.3632/22.319	50.584	2.3379	-3.9499	812.83	1936	1.0965	0.012897	0.9871	0.025794	0.48255	FALSE
HGLibA_37550	POLR1A	136.05/33.424/90.962	0/12.726/53.221	74.528	3.9895	-3.9201	2872.3	2852.5	1.3207	0.012903	0.9871	0.025806	0.48267	FALSE
HGLibB_44418	SLC17A5	75.132/66.848/13.73	0/19.999/3.4336	41.046	1.8222	-3.8971	1286.9	1571	0.9896	0.012926	0.98707	0.025851	0.48334	FALSE
HGLibB_20464	GSTP1	72.086/55.707/68.651	34.175/0/11.159	65.084	3.2793	-3.9488	74.842	2491	1.2383	0.012929	0.98707	0.025858	0.48334	FALSE
HGLibB_35338	PCDH1	38.581/40.387/81.523	0/16.362/8.5841	50.275	2.327	-3.9459	605.46	1924.2	1.093	0.012937	0.98706	0.025874	0.4835	FALSE
HGLibA_57316	hsa-mir-1229	54.826/157.37/151.03	0/36.361/123.61	109.24	7.5691	-3.6854	3512	4181.1	1.5724	0.012954	0.98705	0.025908	0.48382	FALSE
HGLibA_31378	NCSTN	82.239/0/17.163	0/0/6.8672	5.1188	0.31148	-2.2221	3059.4	195.92	0.34345	0.012971	0.98703	0.025943	0.48424	FALSE
HGLibB_26200	LDLR	320.83/324.49/208.53	87.879/50.905/44.637	278.97	58.454	-2.2354	4393.7	10677	2.1341	0.012995	0.98701	0.025989	0.48488	FALSE
HGLibA_54466	XAGE1A	1860/1863.4/1760.9	1368.6/1095.4/1267.9	1827.5	1238.7	-0.56062	3391.8	69945	2.2262	0.013002	0.987	0.026004	0.48507	FALSE
HGLibB_54946	ZCCHC13	271.08/144.84/53.204	0/79.085/139.92	127.86	10.25	-3.5178	13188	4893.7	1.6812	0.013006	0.98699	0.026012	0.48515	FALSE
HGLibA_54180	WDR77	51.78/47.351/90.104	0/4.5451/62.664	60.456	2.9778	-3.9495	563.01	2313.9	1.1949	0.013009	0.98699	0.026018	0.48519	FALSE
HGLibA_36140	PFDN2	47.719/71.026/74.658	25.224/0/13.734	63.252	3.1722	-3.9449	215.9	2420.9	1.2211	0.013021	0.98698	0.026042	0.48557	FALSE
HGLibA_41326	RIPK4	35.535/0/24.886	0/5.4542/0	4.3654	0.28154	-2.0658	705.86	167.08	0.31594	0.013029	0.98697	0.026058	0.48579	FALSE
HGLibB_24003	KANSL1	44.673/43.173/42.907	0/14.544/6.0088	43.577	1.9759	-3.9049	0.90714	1667.9	1.0187	0.013075	0.98692	0.026151	0.48724	FALSE
HGLibA_35095	PAN3	158.39/50.136/48.914	0/9.0903/70.389	72.976	3.9162	-3.9114	4197.8	2793.1	1.3067	0.013081	0.98692	0.026163	0.48724	FALSE
HGLibB_13567	DNAJC17	88.331/107.24/99.543	0/60.905/42.92	98.06	6.3024	-3.7618	90.524	3753.1	1.4978	0.013085	0.98691	0.02617	0.48724	FALSE
HGLibB_26523	LIN28B	473.13/253.47/180.21	56.958/81.812/42.92	278.55	58.484	-2.2325	24081	10661	2.1313	0.013086	0.98691	0.026173	0.48724	FALSE
HGLibA_52515	UBA2	39.597/22.283/47.197	3.2548/0/12.876	34.667	1.5328	-3.8158	167.34	1326.8	0.90963	0.013126	0.98687	0.026253	0.48843	FALSE
HGLibB_01118	AFM	85.285/128.13/45.481	0/14.544/64.38	79.22	4.4537	-3.8786	1783.4	3032.1	1.3578	0.01313	0.98687	0.026259	0.48843	FALSE
HGLibA_57565	hsa-mir-1277	53.811/33.424/40.332	0/6.3632/12.018	41.707	1.8859	-3.8874	108.5	1596.3	0.99669	0.013138	0.98686	0.026275	0.48847	FALSE
HGLibA_05676	C19orf52	59.903/45.958/48.055	13.833/0/11.159	50.955	2.4033	-3.9323	56.718	1950.3	1.0994	0.013143	0.98686	0.026287	0.48849	FALSE
HGLibA_29998	MRPL47	33.505/29.246/27.46	2.4411/0/11.159	29.966	1.3196	-3.7387	9.6602	1146.9	0.84587	0.013167	0.98683	0.026334	0.48903	FALSE
HGLibB_39460	PTPRJ	38.581/0/42.907	0/0/7.7257	5.3998	0.32773	-2.2691	1268.5	206.67	0.35281	0.013167	0.98683	0.026334	0.48903	FALSE
HGLibB_24612	KIAA0586	2.0306/34.817/56.637	0/0/60.088	16.061	0.74431	-3.29	1097.5	614.72	0.61777	0.013222	0.98678	0.026444	0.49069	FALSE
HGLibA_58924	hsa-mir-320a	0/50.136/54.921	0/0/10.301	6.414	0.37028	-2.4358	2152.8	245.49	0.38573	0.013222	0.98678	0.026444	0.49069	FALSE
HGLibA_42361	RSRC2	268.04/69.634/72.083	0/45.451/111.59	110.41	7.8832	-3.6487	13989	4225.9	1.5772	0.013258	0.98674	0.026515	0.49177	FALSE
HGLibB_09612	CHST13	60.918/57.1/36.042	4.0685/0/36.053	50.052	2.3701	-3.9211	182.02	1915.7	1.0894	0.01326	0.98674	0.026519	0.49177	FALSE
HGLibA_40249	RAPGEF2	190.88/149.02/47.197	0/62.723/80.69	110.34	7.8767	-3.6488	5984.6	4223	1.5767	0.013264	0.98674	0.026528	0.49182	FALSE
HGLibB_19803	GPN3	22.337/176.87/76.374	0/23.635/19.743	67.113	3.5113	-3.9163	7068.5	2568.7	1.2549	0.013266	0.98673	0.026532	0.49182	FALSE
HGLibA_27468	LRRK2	126.91/155.98/78.09	80.556/0/81.549	115.63	8.6002	-3.6027	1582.3	4425.6	1.6089	0.013276	0.98672	0.026551	0.49202	FALSE
HGLibA_49809	TMED3	0/32.031/34.325	0/6.3632/0	4.7003	0.30131	-2.1311	823.36	179.9	0.32797	0.013283	0.98672	0.026565	0.49217	FALSE
HGLibA_53877	VSX2	40.612/57.1/44.623	0/17.271/6.8672	46.949	2.196	-3.9072	74.302	1796.9	1.0557	0.013296	0.9867	0.026592	0.49235	FALSE
HGLibA_21721	HMGN2	0/89.131/24.028	0/9.0903/0	5.8935	0.35128	-2.3509	3646	225.57	0.36901	0.013298	0.9867	0.026596	0.49235	FALSE
HGLibA_32235	NOC2L	100.51/247.9/205.09	0.81369/101.81/81.549	172.25	19.563	-3.0748	5973.3	6592.9	1.8805	0.013302	0.9867	0.026605	0.49245	FALSE
HGLibA_24572	KHDRBS3	38.581/0/49.772	0/0/8.5841	5.6781	0.34283	-2.3142	1529.6	217.32	0.36191	0.013312	0.98669	0.026625	0.49266	FALSE
HGLibA_41930	RPL3	47.719/36.209/15.446	0/10.908/2.5752	29.897	1.3334	-3.727	283.14	1144.3	0.8444	0.013338	0.98666	0.026677	0.49331	FALSE
HGLibA_26733	LMX1A	51.78/101.67/75.516	0/19.09/36.911	73.533	4.0413	-3.886	634.27	2814.4	1.3099	0.01336	0.98664	0.02672	0.49389	FALSE
HGLibA_61014	hsa-mir-4729	125.9/185.23/49.772	0/76.358/52.363	105.11	7.2749	-3.6806	4956.5	4022.9	1.5425	0.01339	0.98661	0.026779	0.49476	FALSE
HGLibA_36399	PHIP	96.453/104.45/95.253	0/36.361/78.973	98.636	6.5062	-3.7305	25.009	3775.2	1.4994	0.013395	0.9866	0.026791	0.49481	FALSE
HGLibA_15759	EXOC7	378.71/257.64/159.61	113.92/21.817/39.487	249.73	46.148	-2.4109	12409	9558.3	2.0824	0.013408	0.98659	0.026815	0.49509	FALSE
HGLibB_15692	EWSR1	350.28/399.7/235.13	95.202/84.539/66.097	320.49	81.028	-1.9706	7223.7	12267	2.1621	0.013426	0.98657	0.026852	0.49536	FALSE
HGLibA_19301	GLRA2	41.627/0/29.177	0/0/6.8672	4.8619	0.31148	-2.1602	983.27	186.08	0.33358	0.013427	0.98657	0.026854	0.49536	FALSE
HGLibA_28813	MED7	46.704/104.45/66.934	0/27.271/19.743	68.866	3.687	-3.8978	880.57	2635.8	1.2696	0.013429	0.98657	0.026858	0.49536	FALSE
HGLibB_03050	ARMCX5-GPRASP2	71.071/214.47/105.55	0/59.087/123.61	117.19	8.9132	-3.5756	5863.2	4485.2	1.6167	0.013432	0.98657	0.026865	0.49541	FALSE
HGLibA_13702	DNMT3A	0/61.278/117.56	0/0/18.885	8.8719	0.47474	-2.7429	7319.5	339.56	0.45569	0.013446	0.98655	0.026892	0.49583	FALSE
HGLibA_62656	hsa-mir-6127	86.3/0/0	0/0/0	0.85244	0	-0.88943	3651.4	32.626	0.14924	0.013486	0.98651	0.026972	0.49678	FALSE
HGLibA_52678	UBE3A	147.22/68.241/76.374	0/54.542/36.911	91.554	5.7698	-3.7731	1936.2	3504.1	1.4492	0.013493	0.98651	0.026986	0.49695	FALSE
HGLibA_56450	ZNF645	28.428/80.775/19.737	0/7.2722/6.8672	35.67	1.6254	-3.804	1170.4	1365.2	0.9214	0.013503	0.9865	0.027007	0.49719	FALSE
HGLibA_07053	CALU	97.469/62.67/67.793	0/20.908/36.911	74.538	4.1681	-3.8695	356.08	2852.9	1.3175	0.013509	0.98649	0.027017	0.49723	FALSE
HGLibB_34345	OR6C4	110.67/132.3/90.104	0/65.45/78.973	109.68	7.9328	-3.6311	448.03	4197.8	1.5704	0.013531	0.98647	0.027062	0.49767	FALSE
HGLibB_36868	PLA2G4F	84.27/144.84/53.204	0/58.178/26.611	86.605	5.2793	-3.8023	2256.1	3314.7	1.4125	0.013532	0.98647	0.027064	0.49767	FALSE
HGLibB_23620	ISCU	109.65/41.78/30.035	0/4.5451/38.628	51.64	2.5202	-3.9024	1964.7	1976.5	1.1049	0.013565	0.98643	0.02713	0.49833	FALSE
HGLibA_58385	hsa-mir-28	83.255/37.602/56.637	0/21.817/11.159	56.184	2.8114	-3.9072	539.15	2150.4	1.151	0.01357	0.98643	0.02714	0.49833	FALSE
HGLibA_11004	CPSF3L	62.949/116.98/29.177	0/36.361/8.5841	59.911	3.0636	-3.9059	2105.6	2293	1.1871	0.013571	0.98643	0.027143	0.49833	FALSE
HGLibB_28256	MAPKAP1	26.398/11.141/12.014	0/57.269/0	15.238	0.73092	-3.2298	75.859	583.22	0.60071	0.013572	0.98643	0.027143	0.49833	FALSE
HGLibA_51719	TROAP	27.413/47.351/44.623	0/5.4542/12.018	38.695	1.788	-3.8316	118.67	1481	0.95902	0.013578	0.98642	0.027157	0.49833	FALSE
HGLibA_27241	LRR1	57.872/4.178/48.055	0/0.90903/14.593	22.758	1.0403	-3.5416	1109.1	871.04	0.73586	0.013578	0.98642	0.027155	0.49833	FALSE
HGLibB_05936	C1QTNF2	95.438/90.524/77.232	37.43/43.633/0	87.383	5.3752	-3.7932	88.896	3344.5	1.418	0.013581	0.98642	0.027163	0.49833	FALSE
HGLibB_03433	ATF2	138.08/58.492/38.616	9.7643/0/53.221	67.83	3.6468	-3.8887	2937.9	2596.1	1.2597	0.013583	0.98642	0.027166	0.49833	FALSE
HGLibA_56558	ZNF695	62.949/114.2/75.516	0/57.269/20.602	81.579	4.8154	-3.8278	723.96	3122.4	1.3738	0.013584	0.98642	0.027169	0.49833	FALSE
HGLibA_25664	KRTAP19-1	85.285/59.885/101.26	0/34.543/31.761	80.27	4.6969	-3.8345	440.63	3072.3	1.3635	0.013591	0.98641	0.027182	0.49841	FALSE
HGLibA_02062	ANKRD30B	79.193/101.67/68.651	0/47.269/25.752	82.068	4.8659	-3.8239	286.17	3141.1	1.3775	0.013599	0.9864	0.027198	0.49851	FALSE
HGLibB_27805	MAD2L1	30.459/65.456/18.021	0/15.453/2.5752	33.011	1.5084	-3.7612	641.93	1263.5	0.88627	0.013619	0.98638	0.027239	0.49885	FALSE
HGLibB_25038	KLF4	93.408/146.23/77.232	0/98.175/36.053	101.8	6.9826	-3.6868	1324	3896.4	1.519	0.013622	0.98638	0.027244	0.49887	FALSE
HGLibA_33257	OCM	181.74/135.09/145.02	0/210.89/175.11	152.7	15.363	-3.2316	606.15	5844.4	1.7965	0.013633	0.98637	0.027265	0.4991	FALSE
HGLibA_07926	CCDC91	194.94/98.88/114.99	29.293/1.8181/24.894	130.39	11.111	-3.4394	2698.3	4990.4	1.6884	0.01364	0.98636	0.027281	0.49931	FALSE
HGLibA_10459	COASY	651.82/449.83/229.98	140.77/108.17/156.23	407.04	133.5	-1.6011	46550	15579	2.1916	0.013658	0.98634	0.027317	0.49958	FALSE
HGLibB_28688	MECR	81.224/0/0	0/0/0	0.83341	0	-0.87453	3232	31.898	0.14756	0.013659	0.98634	0.027317	0.49958	FALSE
HGLibB_49967	TMEM161B	103.56/107.24/109.84	0/65.45/70.389	106.85	7.6309	-3.6433	9.9581	4089.5	1.5515	0.01366	0.98634	0.027321	0.49958	FALSE
HGLibA_60269	hsa-mir-4466	0/8.356/0.85813	0/0/0	0.83225	0	-0.87361	28.65	31.853	0.14746	0.013669	0.98633	0.027339	0.49983	FALSE
HGLibB_23973	JUNB	65.994/71.026/126.15	0/19.999/68.672	83.937	5.0704	-3.8065	1135.1	3212.6	1.3914	0.013677	0.98632	0.027354	0.50002	FALSE
HGLibB_14958	ELP3	12.184/54.314/35.183	0/0.90903/27.469	28.577	1.3064	-3.6808	487.39	1093.8	0.82459	0.013685	0.98631	0.02737	0.50018	FALSE
HGLibA_53482	UXT	0/112.81/55.779	0/18.181/0	8.4767	0.46754	-2.691	6597	324.44	0.44465	0.013693	0.98631	0.027386	0.50021	FALSE
HGLibB_47610	STXBP2	154.33/38.995/83.239	0/82.721/12.876	79.436	4.6544	-3.8304	3629.2	3040.3	1.3562	0.013695	0.9863	0.02739	0.50021	FALSE
HGLibA_22648	IFITM3	0/58.492/16.305	0/6.3632/0	4.4807	0.30131	-2.0744	1538.6	171.5	0.31915	0.01371	0.98629	0.02742	0.5006	FALSE
HGLibA_53770	VPS35	0/18.105/7.7232	0/0/2.5752	2.3239	0.19908	-1.471	141.79	88.947	0.2253	0.013711	0.98629	0.027423	0.5006	FALSE
HGLibA_58671	hsa-mir-3153	0/107.24/0	0/0.90903/0	0.92388	0.11609	-0.78556	5652	35.361	0.13584	0.013718	0.98628	0.027437	0.50071	FALSE
HGLibB_37996	PPP1R14D	119.81/51.529/62.644	0/16.362/44.637	72.863	4.0917	-3.8586	1381.6	2788.7	1.3023	0.013732	0.98627	0.027463	0.50089	FALSE
HGLibB_37557	POLR2M	50.765/48.744/55.779	0/35.452/5.1504	51.679	2.5527	-3.8903	13.13	1978	1.1046	0.013732	0.98627	0.027464	0.50089	FALSE
HGLibA_42896	SCFD2	70.056/90.524/20.595	0/2.7271/61.805	50.762	2.4963	-3.888	1431.6	1942.9	1.095	0.013736	0.98626	0.027472	0.50096	FALSE
HGLibA_58295	hsa-mir-222	142.14/115.59/78.948	0/45.451/115.03	109.06	7.9641	-3.618	1021.9	4174.3	1.5648	0.013744	0.98626	0.027488	0.50106	FALSE
HGLibB_42428	RWDD2A	72.086/79.382/68.651	0/28.18/26.611	73.239	4.1272	-3.8559	30.061	2803.1	1.3054	0.013746	0.98625	0.027491	0.50106	FALSE
HGLibA_31107	NANS	59.903/153.19/133.87	0/47.269/100.43	107.11	7.7091	-3.6338	2534.2	4099.5	1.5525	0.013747	0.98625	0.027495	0.50106	FALSE
HGLibA_28808	MED4	127.93/40.387/36.042	0/13.635/19.743	57.12	2.9094	-3.894	2869	2186.2	1.1594	0.013747	0.98625	0.027493	0.50106	FALSE
HGLibB_42571	SAC3D1	287.33/199.15/164.76	0.81369/250.89/142.5	211.26	31.878	-2.6906	4047.7	8085.7	1.9949	0.013756	0.98624	0.027511	0.50116	FALSE
HGLibB_01870	ANAPC13	104.58/79.382/54.062	0/70.904/12.876	76.566	4.4166	-3.84	649.44	2930.5	1.3328	0.013756	0.98624	0.027512	0.50116	FALSE
HGLibA_07170	CAPN5	38.581/65.456/72.083	0/21.817/12.018	56.678	2.8835	-3.8926	320.92	2169.3	1.155	0.013765	0.98623	0.027531	0.50128	FALSE
HGLibB_03408	ATAD3A	70.056/41.78/69.509	0/8.1812/36.911	58.818	3.0295	-3.8919	265.43	2251.2	1.1758	0.013766	0.98623	0.027531	0.50128	FALSE
HGLibA_20589	GTF3C4	22.337/72.419/117.56	0/6.3632/43.779	57.535	2.9495	-3.8895	2532	2202.1	1.1632	0.013805	0.9862	0.027609	0.50228	FALSE
HGLibA_04741	BPTF	46.704/65.456/24.028	0/17.271/5.1504	41.889	1.9893	-3.8427	448.8	1603.3	0.99648	0.013805	0.98619	0.027611	0.50228	FALSE
HGLibA_52497	U2AF2	172.6/87.738/60.927	0/113.63/25.752	97.362	6.5495	-3.7036	3540.5	3726.4	1.4876	0.013824	0.98618	0.027649	0.50273	FALSE
HGLibB_06504	C6orf70	44.673/40.387/43.765	0/54.542/1.7168	42.902	2.0492	-3.8478	5.1021	1642	1.0082	0.013831	0.98617	0.027662	0.5029	FALSE
HGLibA_35012	PAGE4	71.071/44.566/91.82	82.183/0/6.0088	66.258	3.5905	-3.873	573.58	2536	1.2444	0.013841	0.98616	0.027682	0.50311	FALSE
HGLibA_44267	SKA3	56.857/82.168/101.26	23.597/42.724/0	77.921	4.5644	-3.8261	503.21	2982.4	1.3433	0.013844	0.98616	0.027689	0.50315	FALSE
HGLibA_43436	SEPT2	43.658/107.24/111.56	0/23.635/49.788	80.542	4.8105	-3.8108	1517.5	3082.7	1.364	0.013862	0.98614	0.027724	0.50364	FALSE
HGLibB_48178	TAF4B	91.377/72.419/183.64	0/40.906/116.74	106.72	7.725	-3.626	3664.3	4084.6	1.549	0.013878	0.98612	0.027756	0.50404	FALSE
HGLibB_13194	DHX9	44.673/36.209/35.183	0/9.9993/6.8672	38.466	1.8162	-3.8088	27.198	1472.2	0.95517	0.013892	0.98611	0.027783	0.50433	FALSE
HGLibB_02522	APOH	130.97/20.89/17.163	0/5.4542/10.301	36.114	1.6943	-3.784	4794.6	1382.2	0.9258	0.013896	0.9861	0.027791	0.5044	FALSE
HGLibA_14248	DYNC2H1	0/73.812/0	0/0/0	0.80414	0	-0.85131	2665.7	30.778	0.14495	0.013936	0.98606	0.027872	0.50548	FALSE
HGLibB_46873	SRCAP	362.46/260.43/227.41	109.85/92.721/21.46	277.92	60.271	-2.1866	5002.5	10637	2.1103	0.013942	0.98606	0.027885	0.50564	FALSE
HGLibB_48519	TBCA	73.102/0/0	0/0/0	0.80124	0	-0.84899	2614.3	30.667	0.14469	0.013964	0.98604	0.027929	0.50597	FALSE
HGLibB_47150	SSX3	73.102/0/0	0/0/0	0.80124	0	-0.84899	2614.3	30.667	0.14469	0.013964	0.98604	0.027929	0.50597	FALSE
HGLibB_45678	SMIM15	33.505/61.278/0	0/9.9993/0	5.8084	0.36569	-2.3177	1938.8	222.31	0.36504	0.013985	0.98602	0.02797	0.50657	FALSE
HGLibB_53419	VAC14	420.33/409.45/343.25	104.15/146.35/123.61	389.47	123.51	-1.6489	1743.8	14906	2.1783	0.01399	0.98601	0.027981	0.50661	FALSE
HGLibA_08824	CDKN1B	72.086/84.953/24.028	0/16.362/12.876	52.812	2.6747	-3.8722	1116.5	2021.3	1.1152	0.014005	0.98599	0.02801	0.50707	FALSE
HGLibB_12534	DCTN2	77.163/143.45/63.502	38.244/0/50.646	88.918	5.6947	-3.7475	1878.7	3403.2	1.4266	0.014014	0.98599	0.028028	0.50729	FALSE
HGLibA_08615	CDCA7	14.214/6.9634/29.177	0/0/54.08	14.258	0.71523	-3.1531	137.89	545.72	0.57973	0.014032	0.98597	0.028065	0.50783	FALSE
HGLibA_16156	FAM150A	68.025/123.95/41.19	0/9.0903/72.964	70.301	3.9645	-3.8442	1865.3	2690.7	1.2789	0.014041	0.98596	0.028083	0.508	FALSE
HGLibA_32061	NKX6-3	25.382/38.995/0	0/0/6.8672	4.5358	0.31148	-2.0776	821.29	173.6	0.32061	0.014061	0.98594	0.028122	0.50863	FALSE
HGLibA_39594	PUS1	141.13/80.775/48.914	0/33.634/40.345	82.317	5.0481	-3.7841	2288.4	3150.6	1.3766	0.014069	0.98593	0.028138	0.50885	FALSE
HGLibA_31279	NCAPH2	0/40.387/15.446	0/5.4542/0	3.8779	0.28154	-1.9284	740.91	148.42	0.2952	0.014076	0.98592	0.028151	0.50892	FALSE
HGLibA_20547	GTF2H2	372.61/381.59/289.19	149.72/59.087/103.01	345.16	96.958	-1.8212	2606.8	13211	2.1594	0.014091	0.98591	0.028181	0.50916	FALSE
HGLibB_12390	DBR1	123.87/82.168/121	0/69.086/73.823	107.19	7.8971	-3.6041	547.43	4102.6	1.5502	0.014096	0.9859	0.028192	0.50916	FALSE
HGLibA_45925	SNF8	625.42/318.92/404.18	167.62/108.17/190.57	432	151.18	-1.5085	25487	16534	2.1839	0.014101	0.9859	0.028203	0.50916	FALSE
HGLibB_52205	TUBB	147.22/79.382/53.204	0/75.449/21.46	85.36	5.3613	-3.763	2448.1	3267.1	1.3996	0.014104	0.9859	0.028209	0.50916	FALSE
HGLibA_60197	hsa-mir-4448	0/0/69.509	0/0/0	0.78625	0	-0.83693	2362	30.093	0.14333	0.014113	0.98589	0.028226	0.5093	FALSE
HGLibB_14778	EIF3M	83.255/22.283/22.311	0/29.089/1.7168	34.609	1.6438	-3.7515	1334.8	1324.6	0.90574	0.014123	0.98588	0.028247	0.5095	FALSE
HGLibB_28568	MCM3AP	40.612/51.529/42.907	0/45.451/2.5752	44.78	2.2012	-3.838	33.215	1713.9	1.0285	0.014132	0.98587	0.028264	0.50974	FALSE
HGLibB_13193	DHX9	49.75/0/76.374	0/0/14.593	7.1509	0.42768	-2.5133	3328.8	273.69	0.40639	0.014156	0.98584	0.028312	0.51021	FALSE
HGLibB_52568	UBE2M	90.362/83.56/55.779	23.597/0/38.628	74.96	4.4107	-3.8114	339.55	2869	1.3171	0.014211	0.98579	0.028422	0.51173	FALSE
HGLibB_27474	LSG1	79.193/45.958/88.388	0/32.725/18.885	68.524	3.8646	-3.8371	508.81	2622.7	1.2626	0.014215	0.98579	0.028429	0.51178	FALSE
HGLibA_05869	C1orf53	67.01/0/0	0/0/0	0.77551	0	-0.82823	2194.1	29.682	0.14234	0.014222	0.98578	0.028445	0.51186	FALSE
HGLibA_60499	hsa-mir-4514	103.56/168.51/94.395	0/107.27/83.265	118.11	9.5372	-3.4987	1657.4	4520.4	1.6148	0.014251	0.98575	0.028503	0.51264	FALSE
HGLibA_48636	TBRG1	188.85/57.1/146.74	111.48/74.54/0	116.54	9.3084	-3.5113	4836.6	4460.6	1.6056	0.014263	0.98574	0.028527	0.51296	FALSE
HGLibA_28138	MAP2K1	0/0/66.076	0/0/0	0.77143	0	-0.82492	2133	29.526	0.14197	0.014264	0.98574	0.028529	0.51296	FALSE
HGLibA_44497	SLC19A1	65.994/0/0	0/0/0	0.77107	0	-0.82462	2127.6	29.512	0.14194	0.014268	0.98573	0.028536	0.51301	FALSE
HGLibB_17907	FOXP1	49.75/201.94/164.76	0/77.267/117.6	118.31	9.5927	-3.4936	6925.6	4528.4	1.6156	0.014291	0.98571	0.028582	0.51353	FALSE
HGLibB_23450	IPPK	90.362/72.419/28.318	3.2548/89.994/0	57.027	3.015	-3.8533	1086.2	2182.6	1.1561	0.014296	0.9857	0.028593	0.51364	FALSE
HGLibA_36508	PIAS1	245.7/396.91/194.8	31.734/66.359/82.407	266.83	55.787	-2.2377	11278	10213	2.0883	0.014302	0.9857	0.028604	0.51369	FALSE
HGLibA_22348	HTATSF1	135.03/140.66/107.27	0/114.54/118.46	126.77	10.977	-3.4153	320.8	4852.1	1.6624	0.014329	0.98567	0.028658	0.51422	FALSE
HGLibA_14922	ELL	154.33/44.566/74.658	0/29.998/42.062	80.089	4.9252	-3.7746	3401.2	3065.3	1.3576	0.014347	0.98565	0.028694	0.51452	FALSE
HGLibB_32851	NUAK2	47.719/112.81/121	0/38.179/48.071	86.693	5.5918	-3.7337	1688.8	3318.1	1.4079	0.014365	0.98564	0.028729	0.51509	FALSE
HGLibA_37933	PPIG	39.597/51.529/30.035	0/13.635/6.0088	39.428	1.932	-3.7854	117.35	1509.1	0.96523	0.014384	0.98562	0.028768	0.5155	FALSE
HGLibA_50221	TMEM216	11.168/12.534/19.737	0/56.36/0	14.035	0.72651	-3.1224	21.492	537.17	0.57421	0.014442	0.98556	0.028884	0.51701	FALSE
HGLibA_36818	PKIA	61.933/0/0	0/0/0	0.75285	0	-0.80971	1872.1	28.815	0.14025	0.01446	0.98554	0.028921	0.51751	FALSE
HGLibB_10748	COQ5	143.16/91.916/30.035	0/68.177/12.876	73.41	4.358	-3.7957	3544.3	2809.7	1.3027	0.014504	0.9855	0.029007	0.51863	FALSE
HGLibB_32239	NOLC1	59.903/0/18.021	0/0/7.7257	4.6729	0.32773	-2.0951	1625.2	178.85	0.32491	0.014508	0.98549	0.029017	0.51868	FALSE
HGLibB_32508	NPY2R	542.17/307.78/516.6	209.12/134.54/143.35	441.75	159.18	-1.4668	16817	16908	2.1732	0.014549	0.98545	0.029098	0.51978	FALSE
HGLibA_10973	CPNE8	0/0/60.069	0/0/0	0.74423	0	-0.80259	1760.3	28.485	0.13944	0.014554	0.98545	0.029108	0.51978	FALSE
HGLibA_63887	hsa-mir-7515	95.438/6.9634/41.19	21.156/0/1.7168	30.217	1.4689	-3.6604	2457.5	1156.5	0.84533	0.014558	0.98544	0.029116	0.51978	FALSE
HGLibA_45329	SLC6A4	171.59/38.995/103.83	0/19.999/105.58	88.589	5.8666	-3.7057	4790.2	3390.7	1.4206	0.014563	0.98544	0.029126	0.51978	FALSE
HGLibA_01322	AHSP	59.903/0/0	0/0/0	0.74345	0	-0.80194	1750.5	28.455	0.13937	0.014563	0.98544	0.029125	0.51978	FALSE
HGLibA_55979	ZNF430	77.163/25.068/39.474	57.772/1.8181/0	42.435	2.1307	-3.7943	758.2	1624.2	1.0001	0.014586	0.98541	0.029172	0.52044	FALSE
HGLibB_11800	CWC15	0/110.02/15.446	0/9.9993/0	5.4526	0.36569	-2.2403	5532.1	208.7	0.35213	0.014602	0.9854	0.029204	0.5208	FALSE
HGLibB_23722	ITGAE	0/68.241/0	0/0/0.85841	0.78083	0.11241	-0.67886	2276	29.886	0.12227	0.014604	0.9854	0.029209	0.5208	FALSE
HGLibB_52315	TWISTNB	23.352/0/13.73	0/0/4.292	3.0891	0.25282	-1.7066	266.68	118.23	0.26084	0.014608	0.98539	0.029216	0.52082	FALSE
HGLibA_12746	DDX55	134.02/76.597/60.069	0/85.448/20.602	85.121	5.5157	-3.7244	1545.6	3257.9	1.3947	0.014609	0.98539	0.029219	0.52082	FALSE
HGLibB_22297	HSPBAP1	118.79/132.3/67.793	0/57.269/76.398	102.14	7.4993	-3.6011	1183.4	3909.3	1.5137	0.014634	0.98537	0.029267	0.52145	FALSE
HGLibB_52700	UBTD1	54.826/149.02/92.678	0/69.995/35.195	91.154	6.1777	-3.6825	2335	3488.8	1.4387	0.014637	0.98536	0.029274	0.52146	FALSE
HGLibB_09066	CENPN	0/89.131/18.879	0/9.9993/0	5.4326	0.36569	-2.2358	3607.9	207.93	0.35139	0.014638	0.98536	0.029277	0.52146	FALSE
HGLibB_48044	SYTL3	164.48/51.529/106.41	85.438/0/38.628	96.628	6.8193	-3.6422	3366.7	3698.3	1.4768	0.014648	0.98535	0.029297	0.52156	FALSE
HGLibB_43195	SEC61A1	0/107.24/60.069	0/21.817/0	8.5438	0.50292	-2.6668	6234	327.01	0.44466	0.014651	0.98535	0.029301	0.52156	FALSE
HGLibA_38914	PRSS22	115.74/75.204/33.467	0/13.635/42.92	66.305	3.795	-3.8111	1800.9	2537.8	1.2409	0.014652	0.98535	0.029304	0.52156	FALSE
HGLibB_53350	USP9X	25.382/57.1/88.388	7.3232/0/27.469	50.425	2.6353	-3.8223	1056.4	1930	1.0878	0.014652	0.98535	0.029304	0.52156	FALSE
HGLibB_03874	AURKAIP1	121.84/112.81/106.41	0/145.44/53.221	113.51	9.0896	-3.5045	60.124	4344.4	1.5842	0.014673	0.98533	0.029345	0.52205	FALSE
HGLibB_37268	PMM2	91.377/118.38/53.204	0/43.633/36.911	83.185	5.3498	-3.7288	1102.2	3183.8	1.3794	0.014705	0.98529	0.02941	0.52268	FALSE
HGLibB_22745	IFT81	0/55.707/22.311	0/0/8.5841	4.901	0.34283	-2.1357	1454.2	187.58	0.33281	0.014705	0.98529	0.029411	0.52268	FALSE
HGLibA_52926	UGT2B4	22.337/36.209/0	0/0/6.8672	4.235	0.31148	-1.997	683.98	162.09	0.30818	0.01471	0.98529	0.02942	0.52269	FALSE
HGLibA_24493	KDM2A	39.597/34.817/0	0/9.0903/0	5.0752	0.35128	-2.1686	1051	194.25	0.33894	0.01472	0.98528	0.02944	0.5228	FALSE
HGLibA_40095	RAD52	56.857/0/0	0.81369/0/0	0.72892	0.10906	-0.64054	1575.7	27.899	0.11736	0.014724	0.98528	0.029448	0.5228	FALSE
HGLibA_53758	VPS28	76.147/153.19/102.98	0/79.994/68.672	106.31	8.0973	-3.5602	1559.5	4068.8	1.5396	0.014729	0.98527	0.029459	0.52285	FALSE
HGLibB_47426	STK32A	0/0/56.637	0/0/0	0.72786	0	-0.78898	1563.4	27.858	0.1379	0.014736	0.98526	0.029472	0.52291	FALSE
HGLibA_63735	hsa-mir-6888	21.321/30.639/84.097	0/4.5451/17.168	38.031	1.9018	-3.7496	1228	1455.6	0.94697	0.014752	0.98525	0.029504	0.52341	FALSE
HGLibA_45874	SNAP23	80.209/48.744/55.779	0/12.726/31.761	60.194	3.3445	-3.8161	275.6	2303.9	1.1844	0.01477	0.98523	0.02954	0.52389	FALSE
HGLibB_54124	WDR82	68.025/76.597/39.474	0/16.362/23.177	59.033	3.2714	-3.813	385.95	2259.4	1.1731	0.014834	0.98517	0.029669	0.52547	FALSE
HGLibB_52184	TUBA1C	64.979/13.927/36.042	0/5.4542/8.5841	31.973	1.5896	-3.6705	715.82	1223.7	0.86854	0.014867	0.98513	0.029735	0.52616	FALSE
HGLibB_49602	TLR7	33.505/0/12.872	0/0/5.1504	3.4194	0.27445	-1.794	503.09	130.87	0.27491	0.014874	0.98513	0.029749	0.52626	FALSE
HGLibA_44472	SLC17A5	76.147/37.602/132.15	0/51.814/17.168	72.343	4.3755	-3.7702	2399.3	2768.9	1.2917	0.014903	0.9851	0.029807	0.52696	FALSE
HGLibB_45908	SNRPA1	40.612/44.566/70.367	0/8.1812/25.752	50.315	2.6767	-3.8029	264.64	1925.8	1.0856	0.014932	0.98507	0.029865	0.52747	FALSE
HGLibB_06759	C9orf84	80.209/94.702/111.56	0/30.907/101.29	94.63	6.6997	-3.6346	247.26	3621.9	1.4611	0.014933	0.98507	0.029867	0.52747	FALSE
HGLibB_11041	CRABP1	31.474/80.775/18.021	9.7643/0/6.8672	35.801	1.8013	-3.7156	1178.8	1370.3	0.91849	0.014937	0.98506	0.029875	0.52747	FALSE
HGLibA_61136	hsa-mir-4760	18.275/5.5707/8.5813	0/0/28.327	9.5713	0.55753	-2.7628	46.373	366.33	0.47094	0.014937	0.98506	0.029873	0.52747	FALSE
HGLibB_15248	EPC2	98.484/103.06/139.02	0/77.267/98.717	112.16	9.0438	-3.494	495.6	4292.9	1.5738	0.014952	0.98505	0.029904	0.52771	FALSE
HGLibA_17803	FOSL2	77.163/147.62/40.332	26.852/44.542/0	77.177	4.8368	-3.7435	3160.1	2953.9	1.331	0.014953	0.98505	0.029906	0.52771	FALSE
HGLibB_30139	MSANTD4	45.688/0/20.595	0/0/7.7257	4.4591	0.32773	-2.0397	990.06	170.67	0.31624	0.014965	0.98503	0.02993	0.52795	FALSE
HGLibA_05076	C10orf54	51.78/71.026/119.28	0/31.816/35.195	75.989	4.7295	-3.7482	1242.4	2908.4	1.3213	0.014971	0.98503	0.029942	0.52795	FALSE
HGLibA_05520	C17orf102	85.285/161.55/96.111	0/60.905/112.45	109.82	8.7221	-3.5108	1733	4203.1	1.5593	0.01499	0.98501	0.029981	0.5284	FALSE
HGLibA_25029	KLC2	73.102/57.1/63.502	0/63.632/8.5841	64.237	3.7109	-3.7916	65.032	2458.6	1.2207	0.014997	0.985	0.029993	0.52844	FALSE
HGLibA_20174	GPX2	0/38.995/45.481	0/10.908/0	5.5273	0.37926	-2.2426	1373.5	211.55	0.35394	0.015007	0.98499	0.030014	0.52867	FALSE
HGLibA_53765	VPS33A	199/129.52/272.89	35.802/13.635/41.203	191.6	27.21	-2.7714	5258.1	7333.4	1.9197	0.015009	0.98499	0.030019	0.52868	FALSE
HGLibA_52330	TULP1	254.84/29.246/110.7	0/38.179/79.832	93.838	6.6385	-3.6341	15189	3591.6	1.455	0.015014	0.98499	0.030028	0.52877	FALSE
HGLibA_49422	THUMPD3	54.826/34.817/0	11.392/0/0	5.6668	0.38618	-2.2659	1649.2	216.89	0.35856	0.015024	0.98498	0.030048	0.52899	FALSE
HGLibB_28313	MARCKS	96.453/23.675/100.4	0/59.087/7.7257	61.232	3.4913	-3.7925	2092.6	2343.6	1.1927	0.015077	0.98492	0.030154	0.52992	FALSE
HGLibB_36440	PI16	100.51/54.314/173.34	0/66.359/58.372	98.19	7.1974	-3.597	3789.2	3758.1	1.4843	0.015078	0.98492	0.030155	0.52992	FALSE
HGLibA_25020	KL	44.673/204.72/48.914	0/24.544/48.071	76.502	4.8147	-3.7365	9107.4	2928	1.3248	0.015093	0.98491	0.030186	0.53038	FALSE
HGLibA_61446	hsa-mir-500b	336.06/200.54/340.68	41.498/74.54/93.566	284.23	66.154	-2.0866	6438.3	10879	2.0908	0.015106	0.98489	0.030213	0.53057	FALSE
HGLibB_14839	EIF5AL1	56.857/62.67/45.481	0/26.362/11.159	54.521	3.0001	-3.7949	76.793	2086.7	1.1278	0.015119	0.98488	0.030237	0.53089	FALSE
HGLibA_06891	CACNA1F	0/50.136/0	0/0/0	0.69495	0	-0.76124	1222.7	26.599	0.13475	0.015121	0.98488	0.030243	0.5309	FALSE
HGLibA_50199	TMEM207	54.826/41.78/26.602	0/5.4542/17.168	39.356	2.0247	-3.7379	203.93	1506.3	0.96187	0.015123	0.98488	0.030247	0.5309	FALSE
HGLibA_29906	MRPL15	52.796/90.524/103.83	0/59.996/23.177	79.176	5.0911	-3.7184	716.36	3030.4	1.3458	0.015145	0.98485	0.03029	0.5315	FALSE
HGLibB_24849	KIF1A	157.37/54.314/58.353	0/68.177/20.602	79.316	5.1091	-3.7167	3578.6	3035.7	1.3468	0.015158	0.98484	0.030316	0.53173	FALSE
HGLibA_37615	POLR3C	72.086/98.88/74.658	0/49.087/31.761	81.037	5.2914	-3.7048	219.59	3101.6	1.3601	0.015186	0.98481	0.030373	0.53249	FALSE
HGLibA_18467	GAGE2A	411.2/240.93/290.05	91.947/62.723/82.407	306.3	78.04	-1.959	7770.2	11723	2.1081	0.01521	0.98479	0.030419	0.53306	FALSE
HGLibA_27771	LYSMD3	59.903/73.812/67.793	0/15.453/43.779	66.925	3.9866	-3.7678	48.746	2561.5	1.2436	0.015217	0.98478	0.030434	0.5332	FALSE
HGLibA_40784	REEP4	2.0306/59.885/21.453	0/0/63.522	13.918	0.76007	-3.0833	1155.5	532.7	0.57009	0.01522	0.98478	0.03044	0.5332	FALSE
HGLibA_19234	GLDC	141.13/136.48/124.43	0/193.62/112.45	133.82	12.867	-3.2813	74.326	5122	1.6901	0.015223	0.98478	0.030446	0.5332	FALSE
HGLibA_20607	GTPBP3	42.643/142.05/18.879	0/12.726/15.451	48.574	2.612	-3.7787	4827.6	1859.1	1.066	0.015232	0.98477	0.030463	0.53337	FALSE
HGLibA_39783	RAB10	588.87/394.13/270.31	249.8/64.541/144.21	397.36	132.5	-1.5773	26415	15208	2.1477	0.015242	0.98476	0.030484	0.53354	FALSE
HGLibB_12208	CYR61	155.34/75.204/199.09	0/199.99/103.01	132.5	12.63	-3.292	4119.1	5071.4	1.6833	0.015242	0.98476	0.030483	0.53354	FALSE
HGLibA_47346	STAP2	31.474/55.707/24.028	8.9506/7.2722/0	34.802	1.7826	-3.6855	282.09	1332	0.90472	0.015249	0.98475	0.030498	0.53359	FALSE
HGLibB_56151	ZNF552	143.16/73.812/120.14	0/71.813/92.708	108.28	8.639	-3.503	1272.5	4144.4	1.5478	0.015256	0.98474	0.030513	0.53366	FALSE
HGLibB_20783	HADHB	0/0/48.055	0/0/0	0.68382	0	-0.75174	1122.5	26.172	0.13367	0.015258	0.98474	0.030516	0.53366	FALSE
HGLibA_44672	SLC25A21	101.53/157.37/91.82	0/89.994/96.141	113.63	9.4357	-3.4574	1267.7	4349.1	1.58	0.015265	0.98474	0.03053	0.53375	FALSE
HGLibA_44550	SLC22A14	47.719/0/0	0/0/0	0.68199	0	-0.75017	1106.7	26.102	0.13349	0.015281	0.98472	0.030561	0.53391	FALSE
HGLibA_56806	ZNF813	52.796/118.38/54.921	23.597/0/35.195	70.023	4.2732	-3.7515	1431.5	2680.1	1.2701	0.015287	0.98471	0.030575	0.53407	FALSE
HGLibB_19185	GKN2	171.59/192.19/33.467	0/61.814/84.982	103.38	7.9762	-3.5396	8713.2	3956.9	1.5167	0.015298	0.9847	0.030597	0.53422	FALSE
HGLibB_30002	MRPS16	129.96/84.953/63.502	0/45.451/54.08	88.84	6.1726	-3.6468	1173.9	3400.3	1.4177	0.015306	0.98469	0.030612	0.53429	FALSE
HGLibA_44475	SLC17A6	0/47.351/0	0/0/0	0.67998	0	-0.74844	1089.5	26.025	0.13329	0.015306	0.98469	0.030612	0.53429	FALSE
HGLibA_05383	C15orf32	83.255/147.62/25.744	0/26.362/28.327	68.173	4.1214	-3.7556	4170	2609.2	1.2539	0.015327	0.98467	0.030654	0.53466	FALSE
HGLibA_37633	POLR3H	137.07/179.65/168.19	1.6274/101.81/38.628	160.59	18.862	-3.0243	487.34	6146.6	1.8078	0.015369	0.98463	0.030738	0.53567	FALSE
HGLibB_14995	EMC6	232.5/197.76/191.36	19.529/50.905/35.195	206.45	32.715	-2.6213	490.96	7901.6	1.9544	0.015376	0.98462	0.030752	0.53573	FALSE
HGLibA_48944	TECPR2	111.68/55.707/79.806	0/34.543/42.062	79.189	5.1664	-3.7009	803.82	3030.9	1.3446	0.01538	0.98462	0.030759	0.53573	FALSE
HGLibA_05751	C1orf112	67.01/61.278/87.53	0/19.09/47.212	71.1	4.3945	-3.7404	191.57	2721.3	1.2787	0.01538	0.98462	0.03076	0.53573	FALSE
HGLibA_22167	HSD11B2	148.23/82.168/146.74	0/104.54/121.89	121.36	10.748	-3.3807	1451.2	4645	1.623	0.015391	0.98461	0.030782	0.53592	FALSE
HGLibA_62186	hsa-mir-5586	239.61/36.209/90.104	0/70.904/42.062	92.152	6.5896	-3.6175	12439	3527	1.4407	0.015391	0.98461	0.030783	0.53592	FALSE
HGLibB_14996	EMC6	280.22/323.1/309.79	26.038/123.63/142.5	303.83	77.159	-1.9635	482.05	11629	2.102	0.015394	0.98461	0.030789	0.53592	FALSE
HGLibA_01641	ALG9	0/45.958/0	0/0/0	0.67227	0	-0.74181	1025.9	25.73	0.13253	0.015403	0.9846	0.030806	0.53608	FALSE
HGLibB_08506	CDC14B	98.484/140.66/94.395	0/50.905/141.64	109.35	8.875	-3.4822	661	4185.4	1.5531	0.015413	0.98459	0.030826	0.53624	FALSE
HGLibB_56696	ZNF790	68.025/66.848/108.98	106.59/13.635/0	79.138	5.1722	-3.6986	582.63	3028.9	1.344	0.015415	0.98459	0.030829	0.53624	FALSE
HGLibA_42869	SCARB1	542.17/506.93/382.73	214/204.53/139.06	472.06	182.59	-1.3656	7056	18067	2.1535	0.015419	0.98458	0.030837	0.53625	FALSE
HGLibA_06117	C2orf27A	28.428/32.031/13.73	0.81369/0/24.035	23.217	1.2016	-3.4594	97.426	888.62	0.73854	0.015421	0.98458	0.030843	0.53625	FALSE
HGLibA_43779	SFTPD	116.76/65.456/66.934	0/18.181/84.124	79.98	5.2597	-3.6934	866.94	3061.2	1.3505	0.015422	0.98458	0.030843	0.53625	FALSE
HGLibA_53134	URB1	10.153/72.419/84.097	0/11.817/8.5841	39.607	2.0792	-3.7211	1961.8	1515.9	0.96386	0.015428	0.98457	0.030855	0.53626	FALSE
HGLibA_10970	CPNE7	138.08/96.094/138.16	0/126.35/106.44	122.39	10.945	-3.3688	593.17	4684.3	1.6283	0.015429	0.98457	0.030857	0.53626	FALSE
HGLibA_51188	TPRN	64.979/44.566/73.799	0/34.543/12.876	59.79	3.4557	-3.7701	227.49	2288.4	1.1776	0.015429	0.98457	0.030858	0.53626	FALSE
HGLibA_53415	USP9X	556.38/466.55/438.51	144.84/233.62/206.88	484.64	191.3	-1.3365	3801.5	18549	2.1538	0.015443	0.98456	0.030886	0.53668	FALSE
HGLibB_52523	UBE2D3	47.719/76.597/52.346	0/14.544/26.611	57.625	3.2946	-3.7709	242.96	2205.5	1.1569	0.015454	0.98455	0.030908	0.53691	FALSE
HGLibA_47334	STAM2	178.69/29.246/0	21.97/0/0	7.9655	0.50432	-2.5753	14832	304.87	0.42732	0.015463	0.98454	0.030926	0.53715	FALSE
HGLibB_28890	METAP1D	114.73/93.309/105.55	0/74.54/75.54	104.16	8.165	-3.5203	115.69	3986.5	1.5203	0.015473	0.98453	0.030945	0.53737	FALSE
HGLibA_31629	NEIL1	10.153/27.853/47.197	0/24.544/0.85841	23.744	1.2317	-3.4708	375.83	908.77	0.74677	0.01548	0.98452	0.030959	0.5374	FALSE
HGLibA_14198	DUT	44.673/0/0	0/0/0	0.66502	0	-0.73554	968.8	25.453	0.13182	0.015496	0.9845	0.030993	0.53783	FALSE
HGLibB_56924	ZSCAN18	31.474/15.319/0.85813	0/0/20.602	7.6555	0.49156	-2.5368	336.14	293.01	0.41852	0.015508	0.98449	0.031017	0.53817	FALSE
HGLibA_06158	C2orf62	1.0153/13.927/11.156	0/11.817/0	5.505	0.39211	-2.2243	61.507	210.7	0.35224	0.01556	0.98444	0.031121	0.53913	FALSE
HGLibB_25501	KRT75	95.438/103.06/159.61	146.46/0/70.389	116.22	10.009	-3.4125	1244	4448.4	1.5925	0.015565	0.98444	0.03113	0.53913	FALSE
HGLibA_48251	TAF7	202.04/132.3/260.87	7.3232/34.543/84.124	191.06	27.775	-2.7386	4223.5	7312.5	1.9094	0.015568	0.98443	0.031136	0.53913	FALSE
HGLibB_56364	ZNF629	17.26/112.81/80.665	8.1369/0/37.77	53.996	3.0479	-3.7641	2759.7	2066.6	1.1207	0.01557	0.98443	0.031139	0.53913	FALSE
HGLibB_56399	ZNF654	43.658/250.68/43.765	0/57.269/24.894	78.271	5.134	-3.6919	16057	2995.8	1.3362	0.015572	0.98443	0.031143	0.53913	FALSE
HGLibA_00052	AAMDC	43.658/0/0	0/0/0	0.65919	0	-0.73048	924.88	25.23	0.13124	0.015572	0.98443	0.031145	0.53913	FALSE
HGLibA_34329	OR5M1	43.658/0/0	0/0/0	0.65919	0	-0.73048	924.88	25.23	0.13124	0.015572	0.98443	0.031145	0.53913	FALSE
HGLibB_37237	PM20D1	43.658/0/0	0/0/0	0.65919	0	-0.73048	924.88	25.23	0.13124	0.015572	0.98443	0.031145	0.53913	FALSE
HGLibB_45894	SNRNP35	0/43.173/0	0/0/0	0.65638	0	-0.72803	904.26	25.122	0.13096	0.015609	0.98439	0.031219	0.53987	FALSE
HGLibA_50231	TMEM219	101.53/199.15/105.55	0.81369/53.633/37.77	128.75	12.196	-3.2976	3117.7	4927.9	1.6604	0.015621	0.98438	0.031242	0.54012	FALSE
HGLibB_47721	SUMO2	256.87/47.351/48.055	41.498/47.269/0	83.638	5.7191	-3.655	16296	3201.2	1.3772	0.01565	0.98435	0.0313	0.54057	FALSE
HGLibB_54090	WDR67	41.627/32.031/37.758	0/10.908/7.7257	36.926	1.95	-3.6844	23.375	1413.3	0.93036	0.01565	0.98435	0.0313	0.54057	FALSE
HGLibA_06254	C3orf58	35.535/58.492/13.73	1.6274/28.18/0	30.58	1.5968	-3.6042	543.79	1170.4	0.84717	0.015654	0.98435	0.031309	0.54065	FALSE
HGLibA_31451	NDUFA2	50.765/38.995/104.69	0/9.0903/48.929	59.186	3.4584	-3.7548	1274.7	2265.3	1.1709	0.015663	0.98434	0.031326	0.54075	FALSE
HGLibB_36373	PHLDA2	70.056/0/18.879	0/0/10.301	5.0064	0.37028	-2.132	2224.5	191.61	0.33492	0.015663	0.98434	0.031326	0.54075	FALSE
HGLibA_56217	ZNF552	33.505/93.309/53.204	0/39.088/8.5841	55.004	3.1406	-3.7576	966.36	2105.2	1.1303	0.015668	0.98433	0.031336	0.54075	FALSE
HGLibB_09194	CERS2	94.423/137.87/69.509	0/58.178/68.672	96.728	7.2729	-3.5623	1219.6	3702.2	1.4702	0.015684	0.98432	0.031367	0.54103	FALSE
HGLibA_15736	EXOC3	619.33/310.57/306.35	161.92/110.9/118.46	389.14	128.61	-1.5898	33008	14894	2.1348	0.015686	0.98431	0.031373	0.54105	FALSE
HGLibA_24946	KIF4B	96.453/30.639/44.623	0/22.726/11.159	50.911	2.8511	-3.7527	1262.3	1948.6	1.0887	0.015699	0.9843	0.031398	0.54133	FALSE
HGLibB_03807	ATR	133/104.45/105.55	0/221.8/42.062	113.61	9.6805	-3.4237	262.5	4348.3	1.5761	0.015716	0.98428	0.031433	0.54176	FALSE
HGLibA_48688	TCAIM	61.933/33.424/78.09	0/27.271/12.018	54.481	3.1129	-3.7538	528.16	2085.2	1.1249	0.015725	0.98427	0.03145	0.54194	FALSE
HGLibA_34602	ORC1	40.612/32.031/0	0/0/10.301	4.9763	0.37028	-2.1248	1013.3	190.46	0.33375	0.015726	0.98427	0.031453	0.54194	FALSE
HGLibB_27210	LRRC10B	41.627/0/0	0/0/0	0.64726	0	-0.72007	840.1	24.773	0.13004	0.015731	0.98427	0.031462	0.54194	FALSE
HGLibA_44000	SHC1	691.42/373.24/417.05	183.08/139.08/253.23	475.67	186.13	-1.349	30238	18206	2.1459	0.015733	0.98427	0.031466	0.54194	FALSE
HGLibA_45539	SLMO2	84.27/40.387/174.2	0/41.815/48.929	84.027	5.8012	-3.6441	5017.9	3216.1	1.3794	0.015766	0.98423	0.031533	0.54274	FALSE
HGLibA_60962	hsa-mir-4715	345.2/249.29/331.24	70.791/69.995/99.575	305.47	79.02	-1.9373	2699.5	11692	2.0943	0.015791	0.98421	0.031581	0.54321	FALSE
HGLibB_52689	UBR3	111.68/25.068/22.311	4.0685/0/26.611	39.701	2.133	-3.6995	2848.9	1519.5	0.96376	0.015794	0.98421	0.031587	0.54321	FALSE
HGLibB_34015	OR4S1	40.612/0/0	0/0/0	0.64115	0	-0.71471	799.24	24.54	0.12943	0.015814	0.98419	0.031628	0.54372	FALSE
HGLibA_31665	NEK8	0/0/40.332	0/0/0	0.63945	0	-0.71321	788.17	24.474	0.12926	0.015837	0.98416	0.031675	0.54429	FALSE
HGLibB_39011	PSIP1	0/0/40.332	0/0/0	0.63945	0	-0.71321	788.17	24.474	0.12926	0.015837	0.98416	0.031675	0.54429	FALSE
HGLibB_31014	NAE1	51.78/121.16/83.239	0/50.905/33.478	80.535	5.4534	-3.6593	1242.4	3082.4	1.3524	0.015846	0.98415	0.031693	0.54437	FALSE
HGLibB_07561	CCDC121	35.535/43.173/28.318	0/7.2722/10.301	35.156	1.8719	-3.6541	55.583	1345.6	0.90737	0.015853	0.98415	0.031707	0.54437	FALSE
HGLibA_48343	TARP	39.597/23.675/60.069	5.6958/17.271/0	38.337	2.0593	-3.6846	344.42	1467.3	0.94706	0.01586	0.98414	0.031721	0.54452	FALSE
HGLibB_17918	FOXQ1	53.811/90.524/49.772	0/11.817/48.071	62.358	3.7576	-3.7352	512.38	2386.7	1.1995	0.015863	0.98414	0.031726	0.54452	FALSE
HGLibB_56261	ZNF587	92.392/114.2/133.01	0/93.63/94.425	111.96	9.5045	-3.4267	415.52	4285.2	1.5651	0.015865	0.98414	0.031729	0.54452	FALSE
HGLibA_57401	hsa-mir-1251	0/73.812/73.799	0/0/24.035	8.0743	0.52261	-2.5752	4353.2	309.04	0.42958	0.015871	0.98413	0.031741	0.54465	FALSE
HGLibA_21232	HFM1	55.841/111.41/30.893	0/5.4542/76.398	57.724	3.3894	-3.7418	1803	2209.3	1.156	0.015881	0.98412	0.031761	0.54484	FALSE
HGLibB_46406	SPATA2L	39.597/0/0	0/0/0	0.63494	0	-0.70924	759.41	24.302	0.1288	0.0159	0.9841	0.031799	0.54507	FALSE
HGLibB_45598	SMC4	39.597/0/0	0/0/0	0.63494	0	-0.70924	759.41	24.302	0.1288	0.0159	0.9841	0.031799	0.54507	FALSE
HGLibA_31916	NHSL1	18.275/30.639/0.85813	0/0/24.035	8.0492	0.52261	-2.5712	333.29	308.08	0.42882	0.015907	0.98409	0.031813	0.54507	FALSE
HGLibA_16568	FAM26F	116.76/142.05/131.29	0/174.53/115.88	129.62	12.552	-3.2687	161.39	4961	1.662	0.01591	0.98409	0.031819	0.54507	FALSE
HGLibB_29896	MRPL24	0/0/39.474	0/0/0	0.63418	0	-0.70857	754.67	24.273	0.12872	0.01591	0.98409	0.03182	0.54507	FALSE
HGLibB_49621	TM2D1	0/0/39.474	0/0/0	0.63418	0	-0.70857	754.67	24.273	0.12872	0.01591	0.98409	0.03182	0.54507	FALSE
HGLibB_25250	KLRC1	58.887/34.817/41.19	0/7.2722/21.46	43.876	2.4143	-3.7163	157.31	1679.3	1.0118	0.015934	0.98407	0.031867	0.54538	FALSE
HGLibA_28754	MED14	61.933/73.812/0	0/21.817/0	7.611	0.50292	-2.5184	3695.7	291.31	0.41647	0.015935	0.98406	0.031871	0.54538	FALSE
HGLibA_58046	hsa-mir-1910	40.612/27.853/24.028	0/18.181/2.5752	30.069	1.5974	-3.5803	76.28	1150.9	0.83926	0.015938	0.98406	0.031876	0.5454	FALSE
HGLibA_53897	VWA1	52.796/52.922/12.872	0/8.1812/7.7257	33.035	1.7644	-3.622	596.24	1264.4	0.87943	0.01597	0.98403	0.03194	0.54618	FALSE
HGLibB_42805	SCAP	419.32/245.11/242.85	65.095/125.45/46.354	292.25	72.346	-1.9993	10404	11186	2.0792	0.015983	0.98402	0.031965	0.5463	FALSE
HGLibB_20166	GRAMD1A	0/0/38.616	0/0/0	0.62884	0	-0.70384	721.91	24.068	0.12818	0.015985	0.98401	0.03197	0.5463	FALSE
HGLibB_26419	LHX4	69.04/72.419/50.63	42.312/0/14.593	63.26	3.8646	-3.7235	138.41	2421.2	1.2071	0.016001	0.984	0.032003	0.54664	FALSE
HGLibB_19804	GPN3	67.01/76.597/95.253	0/26.362/60.088	78.78	5.3206	-3.6579	207.33	3015.2	1.3378	0.016005	0.98399	0.032011	0.54668	FALSE
HGLibA_59177	hsa-mir-3658	53.811/33.424/0	0/0/12.876	5.5539	0.40627	-2.2205	1568.2	212.57	0.35306	0.016028	0.98397	0.032057	0.54723	FALSE
HGLibA_26878	LOC100862671	88.331/37.602/39.474	0/34.543/7.7257	50.809	2.9041	-3.7301	855.4	1944.7	1.0863	0.016044	0.98396	0.032087	0.54736	FALSE
HGLibB_13669	DNM2	196.97/82.168/101.26	266.08/45.451/0	117.91	10.563	-3.3622	3902.6	4512.7	1.5979	0.016051	0.98395	0.032102	0.54736	FALSE
HGLibB_12997	DEXI	106.61/51.529/181.07	0/73.631/67.814	99.836	7.8409	-3.5117	4488.9	3821.1	1.4882	0.016051	0.98395	0.032102	0.54736	FALSE
HGLibA_59234	hsa-mir-3670-1	120.82/37.602/37.758	37.43/9.9993/0	55.577	3.2591	-3.7316	2448.7	2127.1	1.1344	0.016057	0.98394	0.032114	0.54736	FALSE
HGLibB_17830	FOXD4L5	2.0306/23.675/28.318	0/46.36/0	11.191	0.67451	-2.864	266.56	428.34	0.50815	0.016057	0.98394	0.032115	0.54736	FALSE
HGLibB_34094	OR52A1	77.163/87.738/38.616	0/39.997/16.31	63.949	3.9371	-3.7176	691.14	2447.6	1.213	0.016062	0.98394	0.032123	0.54741	FALSE
HGLibB_56051	ZNF506	40.612/26.461/50.63	0/16.362/6.0088	37.896	2.0585	-3.6687	150.14	1450.4	0.941	0.016065	0.98394	0.032129	0.54741	FALSE
HGLibA_59609	hsa-mir-3937	84.27/86.346/134.73	0/53.633/90.991	99.342	7.7808	-3.5144	824.08	3802.2	1.4849	0.016066	0.98393	0.032132	0.54741	FALSE
HGLibB_17688	FMO4	0/34.817/24.028	0/0/8.5841	4.2838	0.34283	-1.9763	670.22	163.96	0.30778	0.016076	0.98392	0.032152	0.54744	FALSE
HGLibA_21096	HECTD2	0/37.602/0	0/0/0	0.62242	0	-0.69815	684.14	23.822	0.12752	0.016076	0.98392	0.032152	0.54744	FALSE
HGLibB_05813	C1orf194	0/37.602/0	0/0/0	0.62242	0	-0.69815	684.14	23.822	0.12752	0.016076	0.98392	0.032152	0.54744	FALSE
HGLibA_62879	hsa-mir-6507	0/58.492/12.872	8.1369/0/0	4.1359	0.3351	-1.9437	1524	158.3	0.30209	0.016077	0.98392	0.032154	0.54744	FALSE
HGLibA_02178	ANO3	136.05/57.1/69.509	0/83.63/22.319	81.438	5.6257	-3.6372	1858.6	3117	1.3579	0.016082	0.98392	0.032164	0.54744	FALSE
HGLibA_41081	RGS20	64.979/0/53.204	0/0/18.885	6.9264	0.47474	-2.4262	2779.9	265.1	0.39625	0.016082	0.98392	0.032165	0.54744	FALSE
HGLibB_40085	RAG2	75.132/73.812/117.56	37.43/0/66.956	86.713	6.2135	-3.604	626.18	3318.9	1.3973	0.016083	0.98392	0.032165	0.54744	FALSE
HGLibB_01356	AIMP2	38.581/37.602/44.623	5.6958/20.908/0	40.153	2.2005	-3.6846	14.479	1536.8	0.96812	0.016095	0.98391	0.032189	0.54764	FALSE
HGLibB_32181	NNMT	96.453/0/10.298	0/0/9.4425	4.5477	0.35697	-2.0315	4250.2	174.06	0.31764	0.016095	0.9839	0.032191	0.54764	FALSE
HGLibB_35320	PCBP1	80.209/43.173/16.305	0/5.4542/18.885	38.387	2.0929	-3.6707	1129.8	1469.2	0.94687	0.016102	0.9839	0.032203	0.54777	FALSE
HGLibA_43374	SEMA6D	76.147/50.136/54.062	0/12.726/37.77	59.099	3.5487	-3.7238	198.17	2262	1.168	0.016124	0.98388	0.032247	0.54845	FALSE
HGLibA_13459	DNAAF1	75.132/160.16/45.481	91.947/20.908/0	81.81	5.6827	-3.6313	3751.4	3131.2	1.3605	0.016133	0.98387	0.032266	0.5485	FALSE
HGLibB_53407	UVRAG	381.75/292.46/459.1	84.624/94.539/209.45	371.47	118.78	-1.6367	7013.7	14218	2.1192	0.016134	0.98387	0.032269	0.5485	FALSE
HGLibA_62725	hsa-mir-621	122.85/58.492/45.481	0/31.816/28.327	68.89	4.3935	-3.6958	1784	2636.7	1.256	0.016138	0.98386	0.032276	0.54855	FALSE
HGLibA_63790	hsa-mir-7107	0/0/36.9	0/0/0	0.6179	0	-0.69413	658.57	23.65	0.12706	0.016141	0.98386	0.032282	0.54857	FALSE
HGLibB_53404	UTY	59.903/0/60.069	19.529/0/0	7.0206	0.48116	-2.437	2830	268.71	0.39893	0.016146	0.98385	0.032292	0.54865	FALSE
HGLibA_41542	RNF149	25.382/154.59/61.786	0/29.089/20.602	62.383	3.8241	-3.7158	4935.5	2387.6	1.1984	0.016148	0.98385	0.032296	0.54865	FALSE
HGLibB_21939	HOXC4	39.597/0/20.595	0/0/8.5841	4.2472	0.34283	-1.9663	767.44	162.56	0.30623	0.016167	0.98383	0.032333	0.54897	FALSE
HGLibA_62184	hsa-mir-5586	36.551/0/0	0/0/0	0.61564	0	-0.69211	646.05	23.563	0.12683	0.016174	0.98383	0.032348	0.54897	FALSE
HGLibA_25769	KRTAP4-6	36.551/0/0	0/0/0	0.61564	0	-0.69211	646.05	23.563	0.12683	0.016174	0.98383	0.032348	0.54897	FALSE
HGLibA_45699	SMG1	36.551/0/0	0/0/0	0.61564	0	-0.69211	646.05	23.563	0.12683	0.016174	0.98383	0.032348	0.54897	FALSE
HGLibA_13352	DLGAP5	44.673/194.97/90.962	79.742/0/43.779	92.551	6.9496	-3.5568	6392.6	3542.3	1.4383	0.01618	0.98382	0.032361	0.54897	FALSE
HGLibB_50716	TNFRSF21	111.68/112.81/54.921	0/51.814/54.08	88.454	6.452	-3.5854	1128.6	3385.5	1.4093	0.01618	0.98382	0.03236	0.54897	FALSE
HGLibA_32965	NUDT19	55.841/45.958/16.305	0/6.3632/12.018	34.734	1.8859	-3.6302	455.58	1329.4	0.90091	0.016189	0.98381	0.032377	0.54909	FALSE
HGLibB_12173	CYP4F2	72.086/101.67/53.204	0/45.451/25.752	73.06	4.8015	-3.6742	606.73	2796.3	1.2908	0.016192	0.98381	0.032384	0.54909	FALSE
HGLibA_36290	PGRMC2	0/36.209/0	0/0/0	0.61341	0	-0.69011	633.92	23.478	0.1266	0.016206	0.98379	0.032413	0.54915	FALSE
HGLibA_11881	CXCR1	0/36.209/0	0/0/0	0.61341	0	-0.69011	633.92	23.478	0.1266	0.016206	0.98379	0.032413	0.54915	FALSE
HGLibA_28790	MED26	0/36.209/0	0/0/0	0.61341	0	-0.69011	633.92	23.478	0.1266	0.016206	0.98379	0.032413	0.54915	FALSE
HGLibB_48199	TAF8	57.872/83.56/67.793	0/46.36/19.743	68.954	4.4175	-3.6907	168.75	2639.1	1.2562	0.016209	0.98379	0.032417	0.54915	FALSE
HGLibB_27804	MAD2L1	0/0/36.042	0/0/0	0.61231	0	-0.68913	627.99	23.436	0.12648	0.016223	0.98378	0.032445	0.54944	FALSE
HGLibB_46870	SRC	27.413/0/53.204	0/11.817/0	5.1735	0.39211	-2.1488	1414.2	198.01	0.33979	0.016229	0.98377	0.032457	0.54945	FALSE
HGLibA_25767	KRTAP4-5	67.01/90.524/195.65	0/50.905/137.34	105.89	8.7835	-3.4496	4902.9	4052.7	1.5253	0.016245	0.98376	0.03249	0.54973	FALSE
HGLibA_36538	PIF1	107.62/26.461/57.495	0/11.817/30.903	54.725	3.2306	-3.7194	1802.3	2094.5	1.1252	0.016247	0.98375	0.032493	0.54973	FALSE
HGLibA_47744	SULT1B1	159.4/136.48/58.353	59.4/132.72/0	108.29	9.1454	-3.4293	2950.5	4144.7	1.54	0.016253	0.98375	0.032506	0.54987	FALSE
HGLibA_23619	IRS1	79.193/68.241/173.34	0/74.54/62.664	97.855	7.6665	-3.5118	3461.8	3745.3	1.4737	0.016261	0.98374	0.032522	0.55007	FALSE
HGLibB_49905	TMEM141	116.76/73.812/63.502	0/91.812/21.46	81.8	5.7301	-3.6209	810.4	3130.8	1.3595	0.016281	0.98372	0.032562	0.55046	FALSE
HGLibB_27962	MAGIX	386.83/314.74/201.66	82.997/59.996/75.54	290.65	72.187	-1.9946	8874.9	11124	2.0713	0.016285	0.98372	0.03257	0.55049	FALSE
HGLibA_15392	EPX	0/55.707/25.744	0/11.817/0	5.1442	0.39211	-2.142	1503.7	196.89	0.33867	0.016291	0.98371	0.032582	0.55061	FALSE
HGLibA_19791	GPER	61.933/133.7/55.779	0/31.816/48.071	77.305	5.2571	-3.6455	1939.8	2958.8	1.3245	0.016296	0.9837	0.032591	0.55061	FALSE
HGLibA_24729	KIAA1257	56.857/143.45/101.26	0/60.905/62.664	93.829	7.1615	-3.5384	1942	3591.2	1.4462	0.016308	0.98369	0.032617	0.55097	FALSE
HGLibA_20596	GTF3C6	77.163/19.497/52.346	15.46/9.9993/0	42.883	2.4048	-3.688	905.77	1641.3	0.99914	0.016313	0.98369	0.032627	0.55102	FALSE
HGLibB_02474	APOBEC3A_B	67.01/104.45/41.19	0/10.908/71.248	66.069	4.1825	-3.6939	1046.5	2528.7	1.2307	0.016315	0.98369	0.032629	0.55102	FALSE
HGLibA_22007	HOXD9	51.78/44.566/7.7232	5.6958/0/6.0088	26.17	1.4241	-3.4864	667.29	1001.6	0.78189	0.016322	0.98368	0.032643	0.55118	FALSE
HGLibA_33464	OR10A3	0/34.817/0	0/0/0	0.60417	0	-0.68183	585.62	23.124	0.12564	0.016343	0.98366	0.032686	0.55153	FALSE
HGLibA_10592	COL5A3	58.887/52.922/127.86	0/13.635/90.991	73.594	4.9016	-3.6599	1794.3	2816.7	1.2943	0.016362	0.98364	0.032724	0.55185	FALSE
HGLibB_53286	USP38	28.428/12.534/30.893	0/1.8181/12.018	22.254	1.2246	-3.3859	103.61	851.76	0.72056	0.016362	0.98364	0.032724	0.55185	FALSE
HGLibA_06913	CACNA2D4	80.209/93.309/84.097	0/50.905/48.929	85.699	6.2002	-3.5899	45.311	3280.1	1.3881	0.016375	0.98362	0.03275	0.5522	FALSE
HGLibB_01975	ANKLE2	0/0/34.325	0/0/0	0.60085	0	-0.67884	569.03	22.997	0.12529	0.016393	0.98361	0.032786	0.55261	FALSE
HGLibA_24129	KCNA2	83.255/48.744/61.786	0/24.544/26.611	63.06	3.9377	-3.6975	307.2	2413.6	1.2034	0.016394	0.98361	0.032788	0.55261	FALSE
HGLibA_16935	FBF1	62.949/98.88/37.758	0/11.817/50.646	61.72	3.8252	-3.7003	978.28	2362.3	1.1912	0.016403	0.9836	0.032805	0.55282	FALSE
HGLibA_27286	LRRC24	96.453/0/90.104	0/0/35.195	9.4499	0.6067	-2.7013	7082	361.69	0.46499	0.016421	0.98358	0.032842	0.55328	FALSE
HGLibA_41933	RPL30	0/30.639/13.73	0/6.3632/0	3.3901	0.30131	-1.7543	430.45	129.75	0.27116	0.016425	0.98357	0.03285	0.55333	FALSE
HGLibB_31438	NDUFAB1	103.56/0/69.509	1.6274/0/1.7168	8.8693	0.57957	-2.6434	6361.1	339.46	0.44993	0.01644	0.98356	0.03288	0.55349	FALSE
HGLibA_09582	CHRNA7	56.857/38.995/10.298	0/12.726/3.4336	28.401	1.5549	-3.5245	624.84	1087	0.81426	0.016443	0.98356	0.032886	0.55349	FALSE
HGLibA_25773	KRTAP4-7	16.245/0/30.035	0/0/6.8672	3.5656	0.31148	-1.7996	437.04	136.47	0.27856	0.016443	0.98356	0.032887	0.55349	FALSE
HGLibA_02681	ARFRP1	244.69/270.18/316.65	119.61/29.998/75.54	275.6	64.735	-2.0731	1335.1	10548	2.0531	0.016447	0.98355	0.032893	0.55352	FALSE
HGLibB_13226	DIO3	150.26/197.76/138.16	0.81369/53.633/160.52	160.13	19.804	-2.9532	998.03	6128.7	1.7924	0.016461	0.98354	0.032921	0.55384	FALSE
HGLibA_20139	GPRIN1	33.505/0/0	0/0/0	0.59524	0	-0.67377	541.88	22.782	0.12471	0.016478	0.98352	0.032956	0.55419	FALSE
HGLibB_06056	C22orf24	32.49/27.853/12.872	0/1.8181/12.876	22.678	1.2552	-3.3922	109.61	867.96	0.72714	0.016483	0.98352	0.032965	0.55426	FALSE
HGLibA_32615	NR2F6	0/33.424/0	0/0/0	0.59468	0	-0.67327	539.24	22.761	0.12465	0.016487	0.98351	0.032973	0.55426	FALSE
HGLibB_50921	TONSL	292.41/27.853/127.86	150.53/0/38.628	101.42	8.2557	-3.468	21294	3881.7	1.4953	0.016488	0.98351	0.032977	0.55426	FALSE
HGLibB_45884	SNRNP200	0/19.497/18.879	0/0/6.0088	3.238	0.29384	-1.7117	259.75	123.93	0.26447	0.01649	0.98351	0.032979	0.55426	FALSE
HGLibA_42391	RTKN2	117.77/50.136/15.446	0/9.9993/18.885	45.053	2.5765	-3.6867	3095.4	1724.4	1.0229	0.016497	0.9835	0.032995	0.55442	FALSE
HGLibB_00723	ADAL	75.132/23.675/0	0/0/13.734	5.5344	0.4172	-2.205	2601.8	211.82	0.3516	0.016501	0.9835	0.033002	0.55442	FALSE
HGLibA_10619	COL9A1	116.76/107.24/52.346	0/52.724/51.504	86.871	6.3839	-3.5729	1250	3324.9	1.3958	0.016508	0.98349	0.033015	0.55456	FALSE
HGLibB_11115	CRELD1	88.331/68.241/58.353	0/59.087/18.027	70.591	4.6517	-3.663	235	2701.8	1.2686	0.016515	0.98348	0.033031	0.55467	FALSE
HGLibA_09715	CINP	133/11.141/41.19	0/10.908/11.159	39.432	2.2143	-3.653	4779.6	1509.2	0.95802	0.016542	0.98346	0.033084	0.55541	FALSE
HGLibA_33820	OR2L2	29.444/0/13.73	0/6.3632/0	3.3443	0.30131	-1.7391	400.11	128	0.26896	0.016568	0.98343	0.033136	0.55604	FALSE
HGLibA_10079	CLN5	0/37.602/0	0/0/0.85841	0.62242	0.11241	-0.54445	684.14	23.822	0.10449	0.016571	0.98343	0.033143	0.55608	FALSE
HGLibA_21040	HDGF	107.62/54.314/74.658	0/55.451/26.611	75.855	5.1941	-3.6332	737.28	2903.3	1.3114	0.016586	0.98341	0.033172	0.55635	FALSE
HGLibA_16975	FBXL13	32.49/0/0	0/0/0	0.58817	0	-0.66736	509.2	22.511	0.12396	0.016587	0.98341	0.033175	0.55635	FALSE
HGLibA_22334	HSPE1	136.05/232.58/223.11	9.7643/39.088/66.097	191.84	29.368	-2.6668	2875	7342.5	1.8961	0.0166	0.9834	0.0332	0.55648	FALSE
HGLibB_09909	CLDND2	55.841/77.99/115.85	0/36.361/50.646	79.613	5.5983	-3.6109	940.35	3047.1	1.3408	0.016611	0.98339	0.033222	0.55654	FALSE
HGLibB_29428	MME	72.086/73.812/25.744	0/5.4542/56.655	51.563	3.0589	-3.6949	791.42	1973.5	1.0918	0.016611	0.98339	0.033221	0.55654	FALSE
HGLibB_49975	TMEM165	248.75/415.02/230.84	77.301/51.814/90.991	287.77	71.432	-1.9952	10478	11014	2.0614	0.016631	0.98337	0.033262	0.55691	FALSE
HGLibB_37585	POLR3H	108.64/80.775/134.73	0/79.085/93.566	105.74	8.952	-3.423	735.93	4047.2	1.5214	0.016637	0.98336	0.033273	0.55691	FALSE
HGLibA_23756	ITGAL	88.331/94.702/58.353	0/49.996/35.195	78.739	5.5127	-3.614	381.2	3013.7	1.3339	0.016638	0.98336	0.033276	0.55691	FALSE
HGLibB_55687	ZNF286B	0/32.031/0	0/0/0	0.58493	0	-0.66442	494.78	22.387	0.12362	0.016638	0.98336	0.033276	0.55691	FALSE
HGLibB_54109	WDR75	0/32.031/0	0/0/0	0.58493	0	-0.66442	494.78	22.387	0.12362	0.016638	0.98336	0.033276	0.55691	FALSE
HGLibA_12547	DCTN2	0/32.031/0	0/0/0	0.58493	0	-0.66442	494.78	22.387	0.12362	0.016638	0.98336	0.033276	0.55691	FALSE
HGLibA_29712	MPDU1	190.88/229.79/175.06	18.715/135.44/12.018	197.28	31.281	-2.6188	795.85	7550.9	1.9104	0.016643	0.98336	0.033286	0.55692	FALSE
HGLibB_55615	ZNF257	28.428/0/6.8651	0/4.5451/0	2.6085	0.25947	-1.5186	345.79	99.839	0.2351	0.01666	0.98334	0.03332	0.55717	FALSE
HGLibA_50665	TMSB4X	175.65/75.204/127	0/113.63/122.75	118.83	11.079	-3.3104	2599.1	4548.1	1.5977	0.016669	0.98333	0.033338	0.55718	FALSE
HGLibA_23757	ITGAL	0/0/31.751	0/0/0	0.58293	0	-0.66259	486.06	22.311	0.12341	0.016669	0.98333	0.033339	0.55718	FALSE
HGLibB_26545	LIN9	145.19/65.456/60.069	0/109.08/20.602	82.962	5.9915	-3.5861	2351.3	3175.3	1.3659	0.01668	0.98332	0.033359	0.55728	FALSE
HGLibA_13704	DNMT3B	32.49/37.602/15.446	0/6.3632/6.0088	26.632	1.4805	-3.4776	139.89	1019.3	0.78778	0.016688	0.98331	0.033376	0.5574	FALSE
HGLibB_07200	CAPZA1	107.62/19.497/60.069	0/47.269/6.0088	50.168	2.9701	-3.688	2169.8	1920.1	1.0771	0.016694	0.98331	0.033388	0.55753	FALSE
HGLibB_29739	MPST	38.581/150.41/99.543	0/32.725/70.389	83.301	6.0392	-3.5821	3383.6	3188.3	1.3683	0.016707	0.98329	0.033415	0.55778	FALSE
HGLibA_56530	ZNF682	40.612/57.1/45.481	0/24.544/9.4425	47.248	2.765	-3.6797	72.106	1808.4	1.046	0.01673	0.98327	0.033459	0.55833	FALSE
HGLibA_22641	IFITM10	43.658/29.246/54.921	15.46/0/9.4425	41.241	2.3579	-3.653	168.43	1578.4	0.97868	0.016746	0.98325	0.033492	0.55854	FALSE
HGLibB_21751	HNF4A	168.54/204.72/183.64	65.909/10.908/28.327	185.05	27.338	-2.7148	330.81	7082.5	1.874	0.016756	0.98324	0.033511	0.55854	FALSE
HGLibA_04190	BAZ2A	86.3/221.43/168.19	0.81369/69.086/78.973	147.59	16.998	-3.0454	4817.1	5648.8	1.7375	0.01678	0.98322	0.033561	0.55872	FALSE
HGLibA_03696	ATP6AP1L	38.581/0/4.2907	0/0/4.292	2.4705	0.25282	-1.4699	656.71	94.555	0.22806	0.016784	0.98322	0.033569	0.55872	FALSE
HGLibB_48697	TCERG1	542.17/284.11/257.44	87.065/86.357/140.78	341.01	101.91	-1.7326	25344	13052	2.0928	0.016787	0.98321	0.033574	0.55872	FALSE
HGLibA_29967	MRPL37	0/30.639/0	0/0/0	0.57488	0	-0.65525	452.25	22.003	0.12256	0.016798	0.9832	0.033596	0.55872	FALSE
HGLibA_58000	hsa-mir-184	0/30.639/0	0/0/0	0.57488	0	-0.65525	452.25	22.003	0.12256	0.016798	0.9832	0.033596	0.55872	FALSE
HGLibA_14040	DSPP	0/30.639/0	0/0/0	0.57488	0	-0.65525	452.25	22.003	0.12256	0.016798	0.9832	0.033596	0.55872	FALSE
HGLibA_23652	ISCU	0/30.639/0	0/0/0	0.57488	0	-0.65525	452.25	22.003	0.12256	0.016798	0.9832	0.033596	0.55872	FALSE
HGLibB_07385	CBFB	0/30.639/0	0/0/0	0.57488	0	-0.65525	452.25	22.003	0.12256	0.016798	0.9832	0.033596	0.55872	FALSE
HGLibA_48594	TBCE	0/30.639/0	0/0/0	0.57488	0	-0.65525	452.25	22.003	0.12256	0.016798	0.9832	0.033596	0.55872	FALSE
HGLibB_15126	ENO4	82.239/22.283/0	0/0/14.593	5.5908	0.42768	-2.2068	3092.4	213.98	0.35296	0.016801	0.9832	0.033603	0.55872	FALSE
HGLibB_30415	MTPAP	101.53/89.131/40.332	0/32.725/36.053	71.474	4.8142	-3.6398	1092.5	2735.6	1.2745	0.016802	0.9832	0.033604	0.55872	FALSE
HGLibB_01627	ALG3	119.81/44.566/60.069	30.92/0/31.761	68.459	4.5235	-3.6525	1638.9	2620.2	1.249	0.016802	0.9832	0.033605	0.55872	FALSE
HGLibA_46803	SPRR1A	100.51/139.27/94.395	0/125.45/73.823	109.74	9.6542	-3.3776	596.24	4200	1.5443	0.016816	0.98318	0.033632	0.55903	FALSE
HGLibB_00515	ACP5	30.459/0/0	0/0/0	0.57357	0	-0.65404	446.9	21.953	0.12242	0.016819	0.98318	0.033638	0.55905	FALSE
HGLibA_47405	STAU1	91.377/41.78/71.225	17.901/0/43.779	64.791	4.1906	-3.6639	638.85	2479.8	1.2169	0.016826	0.98317	0.033652	0.55919	FALSE
HGLibA_45477	SLCO6A1	162.45/55.707/47.197	0/47.269/31.761	75.323	5.2242	-3.6162	4383.3	2882.9	1.3056	0.016877	0.98312	0.033755	0.56052	FALSE
HGLibA_59737	hsa-mir-4257	34.52/0/0	0/0/0.85841	0.60217	0.11241	-0.52633	575.58	23.048	0.10202	0.016878	0.98312	0.033755	0.56052	FALSE
HGLibA_07806	CCDC58	0/83.56/42.907	0/21.817/0	7.0124	0.50292	-2.4145	3598.6	268.39	0.39734	0.016895	0.98311	0.03379	0.56094	FALSE
HGLibB_47132	SSU72	74.117/123.95/74.658	0/69.995/44.637	88.191	6.6939	-3.5351	829.89	3375.4	1.4027	0.016926	0.98307	0.033853	0.56161	FALSE
HGLibA_31520	NDUFB5	21.321/90.524/33.467	0/4.5451/30.044	40.141	2.3103	-3.6355	1468.6	1536.4	0.96516	0.016927	0.98307	0.033853	0.56161	FALSE
HGLibA_62058	hsa-mir-548q	94.423/40.387/37.758	0/25.453/13.734	52.422	3.182	-3.6752	1062	2006.4	1.0993	0.016934	0.98307	0.033869	0.56176	FALSE
HGLibA_06066	C22orf28	41.627/0/102.12	0.81369/0/2.5752	7.4275	0.52525	-2.4661	5095.5	284.28	0.40937	0.016942	0.98306	0.033883	0.5618	FALSE
HGLibA_17511	FIG4	162.45/140.66/141.59	4.0685/62.723/19.743	147.9	17.221	-3.0307	151.92	5660.8	1.7369	0.016959	0.98304	0.033918	0.56221	FALSE
HGLibA_25168	KLHL26	35.535/36.209/28.318	0/21.817/3.4336	33.153	1.8785	-3.5686	19.196	1268.9	0.87797	0.016962	0.98304	0.033924	0.56224	FALSE
HGLibA_35751	PDCL2	0/0/29.177	0/0/0	0.56401	0	-0.64525	409.66	21.587	0.12139	0.016976	0.98302	0.033951	0.56242	FALSE
HGLibB_06946	CACNG8	52.796/154.59/42.049	48.008/0/23.177	70.027	4.72	-3.6343	4115	2680.2	1.2615	0.016981	0.98302	0.033961	0.56246	FALSE
HGLibB_11475	CSTF2	47.719/0/71.225	0/0/21.46	6.8868	0.49963	-2.3948	2927.1	263.59	0.39341	0.017	0.983	0.033999	0.56294	FALSE
HGLibA_12757	DDX59	12.184/0/12.872	0/0/4.292	2.4164	0.25282	-1.4473	105.28	92.485	0.22498	0.017014	0.98299	0.034027	0.56315	FALSE
HGLibA_28536	MBTPS1	254.84/509.72/378.44	85.438/226.35/84.982	366.33	118.02	-1.6259	16568	14021	2.097	0.017024	0.98298	0.034049	0.56316	FALSE
HGLibA_49586	TKT	128.94/80.775/67.793	87.065/38.179/0	89.05	6.8359	-3.5226	1055.9	3408.3	1.4082	0.017024	0.98298	0.034048	0.56316	FALSE
HGLibA_26731	LMX1A	43.658/0/12.014	0/0/7.7257	3.6565	0.32773	-1.8103	841.66	139.95	0.28138	0.017028	0.98297	0.034055	0.56316	FALSE
HGLibB_48198	TAF8	174.63/73.812/60.927	0/50.905/78.115	92.271	7.2615	-3.4969	4053.2	3531.6	1.4305	0.017067	0.98293	0.034134	0.56401	FALSE
HGLibA_05969	C1R	0/44.566/17.163	0/0/9.4425	4.1562	0.35697	-1.9259	909.67	159.08	0.30123	0.017076	0.98292	0.034152	0.5641	FALSE
HGLibA_26307	LEO1	149.25/73.812/66.934	0/79.085/45.495	90.349	7.0207	-3.5096	2145.5	3458	1.417	0.017082	0.98292	0.034164	0.56418	FALSE
HGLibB_40379	RBBP5	98.484/66.848/101.26	29.293/104.54/0	87.359	6.6501	-3.5298	368.84	3343.6	1.3958	0.017087	0.98291	0.034174	0.5642	FALSE
HGLibA_60949	hsa-mir-4712	33.505/64.063/61.786	0/8.1812/39.487	51.001	3.1005	-3.6647	296.52	1952	1.0842	0.017088	0.98291	0.034175	0.5642	FALSE
HGLibA_31559	NDUFS6	26.398/54.314/95.253	28.479/11.817/0	51.512	3.1415	-3.6644	1275.9	1971.6	1.0894	0.017099	0.9829	0.034197	0.56436	FALSE
HGLibB_28999	MFAP1	124.88/68.241/65.218	0/39.088/59.23	82.223	6.0491	-3.5615	1152.2	3147	1.3579	0.017109	0.98289	0.034217	0.56436	FALSE
HGLibA_45314	SLC6A18	151.28/0/24.028	0/22.726/0	7.0482	0.51114	-2.413	10570	269.76	0.39801	0.017111	0.98289	0.034222	0.56436	FALSE
HGLibB_45646	SMG5	0/22.283/7.7232	0/4.5451/0	2.4968	0.25947	-1.4732	212.52	95.561	0.22887	0.017116	0.98288	0.034231	0.56436	FALSE
HGLibA_06716	C9orf173	0/22.283/25.744	0/8.1812/0	3.7674	0.33588	-1.8354	419.99	144.2	0.28577	0.01712	0.98288	0.03424	0.56442	FALSE
HGLibA_54098	WDR45	134.02/57.1/102.98	0/87.267/46.354	92.373	7.3038	-3.4912	1545.5	3535.5	1.4307	0.017142	0.98286	0.034283	0.56467	FALSE
HGLibB_45926	SNRPD3	73.102/38.995/20.595	48.822/0/2.5752	38.88	2.2566	-3.6142	752.74	1488.1	0.94938	0.017145	0.98286	0.03429	0.56467	FALSE
HGLibB_41814	RPL13	0/27.853/0	0/0/0	0.55385	0	-0.63585	372.94	21.198	0.12029	0.017146	0.98285	0.034293	0.56467	FALSE
HGLibA_50828	TNFSF9	0/27.853/0	0/0/0	0.55385	0	-0.63585	372.94	21.198	0.12029	0.017146	0.98285	0.034293	0.56467	FALSE
HGLibA_40021	RABGGTB	0/27.853/0	0/0/0	0.55385	0	-0.63585	372.94	21.198	0.12029	0.017146	0.98285	0.034293	0.56467	FALSE
HGLibB_32166	NMT2	78.178/151.8/158.75	170.88/0/109.02	123.51	12.211	-3.2365	2048.7	4727.4	1.6188	0.01715	0.98285	0.034299	0.56468	FALSE
HGLibA_35190	PARD6G	81.224/41.78/29.177	0/44.542/5.1504	46.271	2.7619	-3.6514	767.05	1771	1.0339	0.017151	0.98285	0.034303	0.56468	FALSE
HGLibB_31204	NBPF9	201.03/176.87/128.72	61.841/39.997/4.292	166.03	22.078	-2.8555	1367.2	6354.7	1.8058	0.017157	0.98284	0.034314	0.5647	FALSE
HGLibA_59761	hsa-mir-4263	150.26/143.45/92.678	0/188.17/110.73	125.95	12.679	-3.2142	1002.2	4820.4	1.6314	0.017163	0.98284	0.034326	0.56475	FALSE
HGLibA_30194	MSH3	49.75/73.812/46.339	13.019/0/34.336	55.416	3.4616	-3.6605	226.45	2121	1.1281	0.017165	0.98283	0.034331	0.56475	FALSE
HGLibA_26009	LANCL3	164.48/0/11.156	0/15.453/0	5.6005	0.43779	-2.1987	12652	214.36	0.35263	0.01718	0.98282	0.034361	0.565	FALSE
HGLibB_11174	CRLF1	216.26/50.136/130.44	0/87.267/127.04	112.27	10.257	-3.3309	7502.3	4296.9	1.5562	0.017189	0.98281	0.034378	0.56511	FALSE
HGLibA_31115	NAP1L2	55.841/142.05/156.18	0/74.54/117.6	107.41	9.4775	-3.3712	3118.9	4111.2	1.5274	0.017191	0.98281	0.034381	0.56511	FALSE
HGLibA_35078	PALMD	0/0/27.46	0/0/0	0.55077	0	-0.63299	362.36	21.08	0.11996	0.017199	0.9828	0.034398	0.56531	FALSE
HGLibB_06753	C9orf72	0/23.675/92.678	0/0/17.168	5.9422	0.45686	-2.2525	3936.5	227.43	0.36373	0.01722	0.98278	0.03444	0.56576	FALSE
HGLibB_13499	DNAJA4	58.887/25.068/133.87	45.567/0/12.018	58.272	3.7107	-3.6533	3408.9	2230.3	1.1553	0.01723	0.98277	0.03446	0.56586	FALSE
HGLibA_18938	GFER	261.95/217.26/188.79	119.61/44.542/12.876	220.66	40.984	-2.4004	1366	8445.6	1.9551	0.017252	0.98275	0.034504	0.56635	FALSE
HGLibB_13844	DPP10	105.59/30.639/66.076	0/10.908/55.796	59.807	3.8479	-3.6488	1493.1	2289	1.1696	0.017259	0.98274	0.034518	0.5665	FALSE
HGLibA_53748	VPS25	47.719/34.817/12.014	8.1369/5.4542/0	27.146	1.5601	-3.4587	355.53	1039	0.79378	0.017269	0.98273	0.034538	0.56668	FALSE
HGLibB_20642	GUF1	49.75/68.241/0	0/0/22.319	6.8842	0.50749	-2.3868	2824.7	263.48	0.39284	0.017273	0.98273	0.034547	0.56674	FALSE
HGLibA_50229	TMEM218	0/0/30.893	0/0/0.85841	0.57674	0.11241	-0.50325	459.86	22.074	0.098828	0.017285	0.98272	0.034569	0.56685	FALSE
HGLibB_39964	RABGEF1	147.22/77.99/58.353	0/60.905/52.363	87.51	6.7402	-3.5154	2252.9	3349.4	1.3956	0.017286	0.98271	0.034573	0.56685	FALSE
HGLibB_48453	TBC1D24	28.428/37.602/54.921	0/21.817/6.0088	38.869	2.2745	-3.6059	184.13	1487.7	0.94878	0.01729	0.98271	0.03458	0.5669	FALSE
HGLibB_54820	ZBTB42	0/0/26.602	0/0/0	0.54394	0	-0.62662	339.81	20.819	0.11921	0.017318	0.98268	0.034635	0.56754	FALSE
HGLibA_59288	hsa-mir-3684	75.132/23.675/0	0/0/15.451	5.5344	0.43776	-2.1842	2601.8	211.82	0.35018	0.017319	0.98268	0.034638	0.56754	FALSE
HGLibB_31520	NDUFS7	50.765/105.84/89.246	0/117.26/16.31	78.277	5.6749	-3.5701	818.56	2996	1.3264	0.017329	0.98267	0.034658	0.56772	FALSE
HGLibB_48099	TACC1	43.658/58.492/36.9	0/14.544/15.451	45.507	2.7345	-3.6385	123.06	1741.7	1.0249	0.017329	0.98267	0.034659	0.56772	FALSE
HGLibA_17533	FIP1L1	360.43/238.15/121.85	32.548/27.271/73.823	218.7	40.324	-2.4105	14922	8370.7	1.9497	0.017338	0.98266	0.034676	0.56773	FALSE
HGLibA_46986	SRGN	0/26.461/0	0/0/0	0.54281	0	-0.62556	336.17	20.775	0.11909	0.017338	0.98266	0.034675	0.56773	FALSE
HGLibB_19041	GIGYF2	643.7/454.01/471.97	235.97/165.44/272.97	516.68	220.06	-1.2276	11030	19776	2.1093	0.017343	0.98266	0.034685	0.56773	FALSE
HGLibA_07614	CCDC14	16.245/5.5707/39.474	2.4411/0/4.292	15.322	0.93728	-3.0747	339.63	586.44	0.59401	0.017368	0.98263	0.034737	0.56822	FALSE
HGLibA_11865	CXCL2	85.285/80.775/54.921	65.095/20.908/0	72.328	5.0546	-3.5983	271.13	2768.3	1.2786	0.017372	0.98263	0.034743	0.56825	FALSE
HGLibB_50861	TNS3	0/38.995/49.772	0/16.362/0	5.6986	0.44806	-2.2097	1541.8	218.11	0.35552	0.017379	0.98262	0.034757	0.56829	FALSE
HGLibB_40751	REG3G	61.933/104.45/121	0/64.541/64.38	92.163	7.3698	-3.4765	948.1	3527.5	1.4277	0.017382	0.98262	0.034765	0.56829	FALSE
HGLibB_48434	TBC1D2	169.55/91.916/61.786	0/86.357/67.814	98.757	8.2738	-3.4272	3213	3779.8	1.4717	0.017384	0.98262	0.034767	0.56829	FALSE
HGLibA_45386	SLC7A9	0/91.916/29.177	0/0/19.743	6.3584	0.48327	-2.3106	3940.6	243.36	0.37661	0.017386	0.98261	0.034773	0.56829	FALSE
HGLibA_58938	hsa-mir-320c-2	57.872/73.812/63.502	0/66.359/12.876	64.734	4.3181	-3.6277	65.504	2477.6	1.2138	0.017388	0.98261	0.034777	0.56829	FALSE
HGLibB_14712	EIF2B1	74.117/71.026/47.197	0/10.908/69.531	62.868	4.1479	-3.633	219.33	2406.2	1.1971	0.017392	0.98261	0.034784	0.56829	FALSE
HGLibA_14954	ELOF1	376.68/254.86/175.06	64.282/69.995/41.203	256.15	57.023	-2.1479	10552	9803.9	2.0111	0.017402	0.9826	0.034804	0.56846	FALSE
HGLibA_63941	hsa-mir-770	92.392/194.97/82.381	0/114.54/109.02	114.07	10.675	-3.3011	4009.8	4365.9	1.5648	0.017406	0.98259	0.034812	0.56852	FALSE
HGLibB_10642	COMMD10	232.5/557.07/341.54	87.879/115.45/135.63	353.67	111.23	-1.6601	28100	13536	2.0838	0.017425	0.98257	0.034851	0.56885	FALSE
HGLibA_16588	FAM43A	52.796/8.356/39.474	0/2.7271/14.593	25.961	1.5075	-3.4266	606.31	993.65	0.77577	0.017432	0.98257	0.034864	0.56898	FALSE
HGLibA_59855	hsa-mir-4287	38.581/45.958/57.495	0/7.2722/34.336	46.716	2.839	-3.6357	91.465	1788	1.0377	0.017439	0.98256	0.034878	0.56911	FALSE
HGLibB_01415	AKAP14	0/0/25.744	0/0/0	0.53697	0	-0.62009	317.99	20.552	0.11845	0.017441	0.98256	0.034882	0.56911	FALSE
HGLibA_11605	CTDP1	210.17/295.25/114.99	82.997/33.634/10.301	192.53	30.678	-2.611	8437.3	7368.7	1.8854	0.017449	0.98255	0.034898	0.56921	FALSE
HGLibA_21205	HEXB	133/19.497/116.71	0/9.0903/110.73	67.19	4.5702	-3.6138	4529	2571.6	1.2348	0.017471	0.98253	0.034942	0.56972	FALSE
HGLibA_28403	MAST2	157.37/57.1/42.907	0/34.543/41.203	72.797	5.1304	-3.5895	4146.3	2786.2	1.2819	0.017472	0.98253	0.034943	0.56972	FALSE
HGLibA_41129	RHBDD3	25.382/0/0	0/0/0	0.53399	0	-0.61729	309.01	20.438	0.11812	0.017494	0.98251	0.034989	0.57	FALSE
HGLibA_54758	YY1	25.382/0/0	0/0/0	0.53399	0	-0.61729	309.01	20.438	0.11812	0.017494	0.98251	0.034989	0.57	FALSE
HGLibA_38157	PPP2R3B_X	179.71/189.4/62.644	0/164.53/151.08	128.72	13.452	-3.1661	5324	4926.8	1.6423	0.017518	0.98248	0.035036	0.57061	FALSE
HGLibB_19917	GPR156	0/9.7487/20.595	0/0/5.1504	2.6316	0.27445	-1.5107	190.13	100.72	0.23487	0.01753	0.98247	0.035059	0.57075	FALSE
HGLibA_42413	RTN4R	33.505/130.91/170.77	0/109.99/36.053	90.848	7.2559	-3.4757	5640.3	3477.1	1.4176	0.017535	0.98247	0.035069	0.57084	FALSE
HGLibA_43275	SEH1L	48.734/71.026/38.616	0/9.0903/38.628	51.133	3.1894	-3.6374	279.09	1957.1	1.0837	0.017538	0.98246	0.035077	0.57088	FALSE
HGLibB_30384	MTMR3	59.903/87.738/125.29	56.145/0/57.513	87.004	6.7686	-3.5018	1100.3	3330	1.3904	0.017542	0.98246	0.035083	0.57088	FALSE
HGLibB_49420	TIGD7	162.45/154.59/39.474	0/85.448/73.823	99.735	8.4835	-3.409	5286.5	3817.3	1.4769	0.017543	0.98246	0.035086	0.57088	FALSE
HGLibA_07927	CCDC92	30.459/48.744/26.602	0/2.7271/32.619	34.058	1.9992	-3.5471	142.1	1303.6	0.88795	0.017559	0.98244	0.035118	0.57112	FALSE
HGLibA_39494	PTPRCAP	0/0/24.886	0/0/0	0.52984	0	-0.61338	296.89	20.279	0.11766	0.01757	0.98243	0.035139	0.57112	FALSE
HGLibA_51323	TRAPPC4	0/0/24.886	0/0/0	0.52984	0	-0.61338	296.89	20.279	0.11766	0.01757	0.98243	0.035139	0.57112	FALSE
HGLibA_18795	GCLC	0/0/24.886	0/0/0	0.52984	0	-0.61338	296.89	20.279	0.11766	0.01757	0.98243	0.035139	0.57112	FALSE
HGLibA_62988	hsa-mir-663b	0/0/24.886	0/0/0	0.52984	0	-0.61338	296.89	20.279	0.11766	0.01757	0.98243	0.035139	0.57112	FALSE
HGLibA_52737	UBQLN3	0/0/24.886	0/0/0	0.52984	0	-0.61338	296.89	20.279	0.11766	0.01757	0.98243	0.035139	0.57112	FALSE
HGLibB_04309	BCL2L12	50.765/18.105/0	0/0/11.159	4.4241	0.38288	-1.9717	1177.1	169.33	0.31056	0.017586	0.98241	0.035172	0.57145	FALSE
HGLibB_40691	RDH14	78.178/104.45/96.969	0/77.267/56.655	92.515	7.5007	-3.4595	183.92	3540.9	1.4287	0.017599	0.9824	0.035198	0.57177	FALSE
HGLibB_39653	PYROXD1	56.857/41.78/41.19	0/19.09/12.876	46.081	2.8201	-3.6235	79.265	1763.7	1.0301	0.017616	0.98238	0.035232	0.57216	FALSE
HGLibA_46244	SOX15	49.75/201.94/70.367	0/43.633/84.124	89.099	7.0683	-3.4812	7315.9	3410.2	1.4047	0.017638	0.98236	0.035276	0.57238	FALSE
HGLibB_36666	PIP5K1A	22.337/190.8/35.183	0/43.633/9.4425	53.165	3.3686	-3.6321	10108	2034.8	1.1039	0.017639	0.98236	0.035278	0.57238	FALSE
HGLibB_56455	ZNF679	17.26/9.7487/7.7232	0/56.36/0	10.918	0.72651	-2.7872	25.898	417.88	0.49856	0.017642	0.98236	0.035283	0.57238	FALSE
HGLibA_31728	NEURL2	24.367/0/0	0/0/0	0.52545	0	-0.60924	284.49	20.111	0.11717	0.01765	0.98235	0.0353	0.57238	FALSE
HGLibA_54338	WNK3	24.367/0/0	0/0/0	0.52545	0	-0.60924	284.49	20.111	0.11717	0.01765	0.98235	0.0353	0.57238	FALSE
HGLibB_52919	UMPS	72.086/22.283/103.83	27.666/0/17.168	55.071	3.5329	-3.6287	1871.2	2107.8	1.1226	0.017684	0.98232	0.035368	0.57297	FALSE
HGLibB_19411	GNA11	57.872/0/12.014	9.7643/0/0	4.0257	0.36205	-1.8836	1489.7	154.08	0.29515	0.017684	0.98232	0.035368	0.57297	FALSE
HGLibB_08582	CDC5L	59.903/71.026/16.305	0/16.362/10.301	41.115	2.4774	-3.5982	931.61	1573.6	0.974	0.017686	0.98231	0.035371	0.57297	FALSE
HGLibB_16825	FANCF	15.229/107.24/14.588	0/5.4542/10.301	28.812	1.6943	-3.4679	3268.5	1102.8	0.81661	0.017688	0.98231	0.035375	0.57297	FALSE
HGLibB_53306	USP44	111.68/91.916/92.678	0/45.451/132.19	98.353	8.3466	-3.4101	125.66	3764.4	1.467	0.017689	0.98231	0.035377	0.57297	FALSE
HGLibA_30479	MTRNR2L3	118.79/20.89/21.453	27.666/4.5451/0	37.648	2.2451	-3.574	3563.6	1440.9	0.93264	0.017694	0.98231	0.035389	0.57298	FALSE
HGLibA_11005	CPSF4	212.2/130.91/151.89	1.6274/85.448/66.956	161.59	21.379	-2.861	1798.2	6184.8	1.7829	0.017703	0.9823	0.035406	0.57299	FALSE
HGLibA_57605	hsa-mir-1285-2	0/0/24.028	0/0/0	0.52255	0	-0.60649	276.52	20	0.11685	0.017704	0.9823	0.035408	0.57299	FALSE
HGLibB_19519	GNL2	75.132/104.45/133.01	0/72.722/97	101.44	8.809	-3.3846	848.92	3882.6	1.4866	0.017711	0.98229	0.035421	0.57313	FALSE
HGLibA_29942	MRPL28	147.22/38.995/28.318	0/19.999/23.177	54.601	3.5033	-3.6261	4756.2	2089.8	1.1178	0.017733	0.98227	0.035466	0.5735	FALSE
HGLibA_37572	POLR2D	101.53/104.45/60.069	91.947/0/34.336	86.047	6.7183	-3.4954	626.62	3293.4	1.3823	0.017736	0.98226	0.035473	0.5735	FALSE
HGLibA_24395	KCNT2	27.413/47.351/0	0/0/13.734	4.973	0.4172	-2.0754	1162.1	190.34	0.33022	0.017737	0.98226	0.035475	0.5735	FALSE
HGLibB_06686	C9orf153	103.56/52.922/58.353	0/42.724/26.611	68.39	4.7543	-3.592	788.49	2617.5	1.2438	0.017739	0.98226	0.035477	0.5735	FALSE
HGLibA_22537	IDE	0/23.675/0	0/0/0	0.5195	0	-0.6036	268.37	19.883	0.1165	0.017761	0.98224	0.035521	0.57382	FALSE
HGLibA_30566	MUM1	0/23.675/0	0/0/0	0.5195	0	-0.6036	268.37	19.883	0.1165	0.017761	0.98224	0.035521	0.57382	FALSE
HGLibA_53528	VARS2	0/23.675/0	0/0/0	0.5195	0	-0.6036	268.37	19.883	0.1165	0.017761	0.98224	0.035521	0.57382	FALSE
HGLibA_54635	YARS	87.316/61.278/57.495	0/29.998/36.053	67.507	4.6741	-3.5938	265.72	2583.8	1.2361	0.017766	0.98223	0.035532	0.57391	FALSE
HGLibA_46305	SP5	85.285/125.34/73.799	72.419/0/61.805	92.403	7.557	-3.4483	740.82	3536.6	1.4267	0.017783	0.98222	0.035566	0.57438	FALSE
HGLibA_37639	POLRMT	33.505/33.424/9.4395	0/15.453/1.7168	21.968	1.3138	-3.3113	210.65	840.8	0.7123	0.017787	0.98221	0.035574	0.57444	FALSE
HGLibA_57622	hsa-mir-1289-1	23.352/0/0	0/0/0	0.51668	0	-0.60092	260.99	19.775	0.11619	0.017814	0.98219	0.035628	0.575	FALSE
HGLibB_05948	C1QTNF6	23.352/0/0	0/0/0	0.51668	0	-0.60092	260.99	19.775	0.11619	0.017814	0.98219	0.035628	0.575	FALSE
HGLibA_24438	KCTD18	26.398/29.246/53.204	5.6958/17.271/0	34.508	2.0593	-3.5369	221.51	1320.8	0.89286	0.017844	0.98216	0.035687	0.57528	FALSE
HGLibA_01611	ALG11	65.994/0/4.2907	0/6.3632/0	2.973	0.30131	-1.6103	1991.1	113.79	0.25046	0.017844	0.98216	0.035689	0.57528	FALSE
HGLibA_44303	SLA2	0/0/23.17	0/0/0	0.51508	0	-0.59939	256.88	19.714	0.11601	0.017844	0.98216	0.035689	0.57528	FALSE
HGLibB_49439	TIMM13	0/0/23.17	0/0/0	0.51508	0	-0.59939	256.88	19.714	0.11601	0.017844	0.98216	0.035689	0.57528	FALSE
HGLibA_03701	ATP6AP2	49.75/51.529/48.914	0/18.181/18.885	50.052	3.1619	-3.6167	1.7843	1915.7	1.0713	0.017868	0.98213	0.035737	0.57579	FALSE
HGLibB_22265	HSPA8	42.643/62.67/50.63	0/19.09/19.743	51.339	3.2643	-3.6175	102.26	1965	1.0845	0.017873	0.98213	0.035746	0.57579	FALSE
HGLibB_24424	KCTD5	838.64/530.61/539.77	388.95/296.34/229.19	621.61	297.83	-1.059	31040	23792	2.0991	0.017874	0.98213	0.035749	0.57579	FALSE
HGLibA_28900	MEPCE	120.82/142.05/30.893	0/35.452/68.672	80.966	6.1531	-3.5184	3913.6	3098.9	1.3439	0.01788	0.98212	0.035761	0.57582	FALSE
HGLibB_15495	ERO1L	42.643/22.283/0	0/11.817/0	4.4736	0.39211	-1.9752	897.02	171.22	0.31192	0.01788	0.98212	0.035761	0.57582	FALSE
HGLibB_00934	ADCYAP1	142.14/153.19/78.948	0/131.81/133.05	119.8	11.965	-3.2199	1641.6	4585.2	1.5925	0.017895	0.98211	0.035789	0.57598	FALSE
HGLibB_19043	GIGYF2	59.903/98.88/115.85	0/38.179/95.283	88.207	7.0473	-3.4706	839.54	3376	1.3968	0.017895	0.98211	0.03579	0.57598	FALSE
HGLibB_01451	AKIP1	100.51/161.55/98.685	0/204.53/75.54	117.02	11.468	-3.2428	1295.7	4479	1.5772	0.017909	0.98209	0.035818	0.57624	FALSE
HGLibB_33500	OR10S1	79.193/62.67/41.19	0/10.908/58.372	58.913	3.9076	-3.6098	369.75	2254.8	1.1584	0.017915	0.98209	0.035829	0.57624	FALSE
HGLibB_49140	TG	137.07/34.817/36.9	0/40.906/12.876	56.068	3.6612	-3.6139	3689.8	2146	1.1313	0.017915	0.98209	0.035829	0.57624	FALSE
HGLibA_43262	SEC63	284.28/317.53/266.88	83.81/56.36/88.416	288.81	74.75	-1.9358	663.11	11054	2.036	0.017921	0.98208	0.035842	0.57627	FALSE
HGLibB_41133	RHOD	47.719/111.41/11.156	0/6.3632/23.177	39.053	2.3686	-3.5717	3044.7	1494.7	0.94886	0.017929	0.98207	0.035858	0.57638	FALSE
HGLibB_13352	DLX1	92.392/32.031/44.623	15.46/0/24.035	50.933	3.2488	-3.6115	1058	1949.4	1.08	0.017969	0.98203	0.035939	0.57729	FALSE
HGLibB_05809	C1orf192	15.229/89.131/42.049	0/1.8181/75.54	38.532	2.339	-3.5655	1557.8	1474.8	0.94245	0.017974	0.98203	0.035947	0.57735	FALSE
HGLibA_40002	RABEP2	141.13/40.387/18.021	0/79.085/3.4336	46.868	2.9359	-3.6043	4879.4	1793.8	1.0373	0.017983	0.98202	0.035966	0.57753	FALSE
HGLibB_28502	MC2R	22.337/0/0	0/0/0	0.50765	0	-0.5923	238.51	19.43	0.11517	0.017987	0.98201	0.035974	0.57753	FALSE
HGLibB_10761	CORO1A	22.337/0/0	0/0/0	0.50765	0	-0.5923	238.51	19.43	0.11517	0.017987	0.98201	0.035974	0.57753	FALSE
HGLibA_50984	TONSL	0/25.068/36.9	0/11.817/0	4.4326	0.39211	-1.9644	749.79	169.65	0.31021	0.017989	0.98201	0.035978	0.57753	FALSE
HGLibB_30336	MTHFD1L	0/22.283/0	0/0/0	0.50716	0	-0.59183	237.35	19.411	0.11511	0.017996	0.982	0.035993	0.57761	FALSE
HGLibA_51518	TRIM48	0/22.283/0	0/0/0	0.50716	0	-0.59183	237.35	19.411	0.11511	0.017996	0.982	0.035993	0.57761	FALSE
HGLibA_10835	COX5A	114.73/52.922/65.218	0/44.542/36.053	73.438	5.3446	-3.5524	1096.7	2810.8	1.2844	0.018001	0.982	0.036003	0.57769	FALSE
HGLibA_58069	hsa-mir-192	326.93/160.16/218.82	5.6958/109.99/135.63	225.44	44.143	-2.3266	7302.4	8628.7	1.9518	0.018008	0.98199	0.036015	0.57774	FALSE
HGLibA_40498	RBM17	103.56/33.424/22.311	21.156/0/9.4425	42.605	2.6272	-3.5876	2105.8	1630.7	0.99001	0.018012	0.98199	0.036024	0.5778	FALSE
HGLibB_16895	FAT4	119.81/96.094/79.806	0/68.177/87.557	97.217	8.3273	-3.3964	407.31	3720.9	1.4572	0.01803	0.98197	0.036061	0.57799	FALSE
HGLibB_08282	CD200R1L	88.331/108.63/109.84	72.419/0/103.87	101.77	9.0015	-3.3611	146.4	3895.1	1.4864	0.018031	0.98197	0.036063	0.57799	FALSE
HGLibB_29977	MRPL53	72.086/130.91/59.211	0/58.178/46.354	82.371	6.3691	-3.5	1499.2	3152.7	1.3536	0.018032	0.98197	0.036065	0.57799	FALSE
HGLibB_31215	NCAM2	70.056/69.634/38.616	0/9.0903/64.38	57.329	3.7987	-3.6035	331.77	2194.2	1.1428	0.018061	0.98194	0.036122	0.57862	FALSE
HGLibA_28005	MAGIX	50.765/0/62.644	0/0/24.035	6.7338	0.52261	-2.3446	2555	257.73	0.38689	0.018071	0.98193	0.036141	0.57875	FALSE
HGLibA_64298	hsa-mir-92b	19.291/0/16.305	0/0/6.8672	3.0685	0.31148	-1.6333	223.88	117.44	0.2544	0.018087	0.98191	0.036173	0.57903	FALSE
HGLibA_50036	TMEM165	222.35/387.16/471.97	131.82/70.904/130.48	343.79	106.84	-1.6768	16530	13158	2.0656	0.018094	0.98191	0.036188	0.57909	FALSE
HGLibA_58623	hsa-mir-3141	99.499/62.67/30.893	0/23.635/25.752	57.766	3.8442	-3.6006	1243.9	2210.9	1.1468	0.018097	0.9819	0.036195	0.57909	FALSE
HGLibA_44118	SIDT2	191.89/41.78/122.71	0/90.903/74.681	99.481	8.6959	-3.3734	6204.4	3807.6	1.4713	0.018118	0.98188	0.036236	0.57954	FALSE
HGLibB_54532	XRCC6	84.27/0/13.73	0/13.635/0	4.7866	0.41596	-2.0309	3210.2	183.2	0.32291	0.018142	0.98186	0.036283	0.57992	FALSE
HGLibB_31035	NAIF1	0/0/21.453	0/0/0	0.49957	0	-0.58455	219.78	19.12	0.11425	0.018146	0.98185	0.036292	0.57992	FALSE
HGLibB_38675	PRPF38B	293.42/221.43/181.07	133.45/53.633/12.876	227.44	45.225	-2.3051	3270.1	8705	1.953	0.018155	0.98184	0.03631	0.57995	FALSE
HGLibB_38688	PRPF40B	93.408/110.02/78.948	0/96.357/51.504	93.269	7.8251	-3.4171	242.87	3569.8	1.4301	0.018168	0.98183	0.036335	0.57995	FALSE
HGLibB_40022	RAD23B	21.321/0/0	0/0/0	0.49834	0	-0.58337	217.05	19.074	0.11411	0.01817	0.98183	0.036341	0.57995	FALSE
HGLibA_46276	SOX8	21.321/0/0	0/0/0	0.49834	0	-0.58337	217.05	19.074	0.11411	0.01817	0.98183	0.036341	0.57995	FALSE
HGLibA_41896	RPL21	21.321/0/0	0/0/0	0.49834	0	-0.58337	217.05	19.074	0.11411	0.01817	0.98183	0.036341	0.57995	FALSE
HGLibA_03729	ATP6V1A	80.209/26.461/87.53	0/9.0903/64.38	57.077	3.7987	-3.5972	1199.9	2184.6	1.1399	0.018171	0.98183	0.036342	0.57995	FALSE
HGLibA_35038	PAK1	79.193/40.387/72.941	21.97/0/36.053	61.565	4.2051	-3.5874	444.33	2356.4	1.1817	0.018184	0.98182	0.036367	0.58009	FALSE
HGLibB_41843	RPL21	0/64.063/2.5744	0/0/5.1504	2.4793	0.27445	-1.4489	1899.3	94.893	0.22634	0.018185	0.98181	0.03637	0.58009	FALSE
HGLibB_32714	NSG1	31.474/139.27/54.062	0/12.726/63.522	61.901	4.2375	-3.5861	3486.4	2369.2	1.1847	0.018189	0.98181	0.036379	0.58014	FALSE
HGLibB_16633	FAM60A	0/48.744/18.021	0/11.817/0	4.3565	0.39211	-1.944	1087.9	166.74	0.30701	0.018195	0.9818	0.036391	0.58026	FALSE
HGLibB_41467	RNF14	72.086/79.382/116.71	0/34.543/105.58	87.411	7.0539	-3.4565	578.75	3345.6	1.3893	0.018199	0.9818	0.036398	0.58029	FALSE
HGLibA_34342	OR5M9	42.643/61.278/24.886	0/28.18/6.0088	40.22	2.4851	-3.5641	342.21	1539.4	0.96177	0.018206	0.98179	0.036412	0.58036	FALSE
HGLibB_06083	C2CD2	36.551/26.461/73.799	0/36.361/5.1504	41.49	2.5751	-3.5711	647.09	1588	0.97654	0.018209	0.98179	0.036419	0.58039	FALSE
HGLibA_31401	NDNF	34.52/0/33.467	0/0/13.734	4.7799	0.4172	-2.028	865.14	182.95	0.32255	0.018213	0.98179	0.036426	0.58042	FALSE
HGLibB_14482	EEF1G	103.56/115.59/88.388	12.205/2.7271/22.319	101.9	9.1048	-3.3481	186.4	3900.1	1.4859	0.018217	0.98178	0.036433	0.58047	FALSE
HGLibA_41926	RPL28	145.19/25.068/150.17	0/111.81/24.035	81.807	6.3641	-3.4912	5955.2	3131.1	1.3483	0.018226	0.98177	0.036452	0.58062	FALSE
HGLibB_29354	MLL2	458.92/272.96/227.41	69.978/139.99/61.805	305.41	84.604	-1.8397	15351	11689	2.0423	0.018239	0.98176	0.036478	0.58073	FALSE
HGLibB_20778	HADH	0/26.461/21.453	0/0/9.4425	3.7541	0.35697	-1.8088	421.48	143.68	0.2834	0.018242	0.98176	0.036483	0.58073	FALSE
HGLibA_39601	PUS3	145.19/136.48/48.914	0/52.724/127.9	98.979	8.677	-3.369	3024.1	3788.3	1.4671	0.018248	0.98175	0.036496	0.58073	FALSE
HGLibA_60244	hsa-mir-4459	0/20.89/0	0/0/0	0.4943	0	-0.57947	208.24	18.919	0.11364	0.018252	0.98175	0.036503	0.58073	FALSE
HGLibB_21246	HHLA3	0/20.89/0	0/0/0	0.4943	0	-0.57947	208.24	18.919	0.11364	0.018252	0.98175	0.036503	0.58073	FALSE
HGLibA_09061	CENPJ	30.459/30.639/52.346	0/2.7271/45.495	36.559	2.2447	-3.533	160.75	1399.3	0.91733	0.018287	0.98171	0.036573	0.58154	FALSE
HGLibA_45581	SMAD5	42.643/119.77/84.955	0/50.905/37.77	75.715	5.6806	-3.5215	1560	2897.9	1.301	0.018306	0.98169	0.036612	0.58184	FALSE
HGLibA_19486	GNB1L	272.1/289.68/287.47	10.578/210.89/169.11	282.97	72.409	-1.9517	91.704	10831	2.0233	0.018308	0.98169	0.036615	0.58184	FALSE
HGLibA_29916	MRPL18	0/0/20.595	0/0/0	0.4915	0	-0.57677	202.32	18.812	0.11332	0.018308	0.98169	0.036617	0.58184	FALSE
HGLibB_03671	ATP5J2	29.444/112.81/37.758	17.901/0/20.602	50.07	3.2402	-3.5903	2256.4	1916.4	1.0698	0.018321	0.98168	0.036641	0.58204	FALSE
HGLibA_46743	SPO11	60.918/12.534/0	0/0/11.159	4.156	0.38288	-1.8986	1654.7	159.07	0.29916	0.018322	0.98168	0.036644	0.58204	FALSE
HGLibA_28704	MDN1	19.291/0/17.163	0/7.2722/0	3.1228	0.31931	-1.6438	234.14	119.52	0.25643	0.018339	0.98166	0.036678	0.58243	FALSE
HGLibA_17370	FGF12	28.428/38.995/30.035	0/4.5451/18.885	32.172	1.966	-3.4833	32.567	1231.3	0.86079	0.018354	0.98165	0.036709	0.58276	FALSE
HGLibB_11131	CRHR2	20.306/0/0	0/0/0	0.48873	0	-0.57409	196.6	18.706	0.113	0.018365	0.98163	0.03673	0.58296	FALSE
HGLibA_59828	hsa-mir-4281	34.52/0/12.014	0/8.1812/0	3.3743	0.33588	-1.7113	528.05	129.15	0.26737	0.018372	0.98163	0.036743	0.58307	FALSE
HGLibB_28725	MED18	527.96/654.56/534.62	345.01/304.52/169.96	569.55	261.38	-1.1207	5088.2	21799	2.0872	0.018379	0.98162	0.036757	0.58311	FALSE
HGLibA_05426	C15orf60	0/6.9634/31.751	0/0/6.0088	2.723	0.29384	-1.5248	434.01	104.22	0.23795	0.018379	0.98162	0.036759	0.58311	FALSE
HGLibA_45367	SLC7A4	25.382/104.45/60.927	53.704/0/9.4425	54.48	3.6167	-3.587	1692.6	2085.2	1.1139	0.018388	0.98161	0.036776	0.5832	FALSE
HGLibA_57720	hsa-mir-1302-8	15.229/0/42.049	0/0/10.301	3.9127	0.37028	-1.842	798.86	149.75	0.28947	0.018426	0.98157	0.036851	0.58416	FALSE
HGLibB_19120	GJA4	21.321/41.78/48.055	0/5.4542/20.602	34.989	2.1571	-3.5109	201.83	1339.2	0.89717	0.018431	0.98157	0.036862	0.58426	FALSE
HGLibB_20005	GPR37	82.239/30.639/30.035	0/34.543/6.0088	42.309	2.666	-3.5624	940.65	1619.3	0.98513	0.018441	0.98156	0.036882	0.5845	FALSE
HGLibB_12489	DCLK2	27.413/86.346/32.609	76.487/2.7271/0	42.589	2.6872	-3.5634	1122.3	1630.1	0.98831	0.018446	0.98155	0.036892	0.58457	FALSE
HGLibB_53603	VIPR1	18.275/13.927/18.879	0/4.5451/3.4336	16.875	1.0796	-3.1036	7.3344	645.89	0.62153	0.01846	0.98154	0.036921	0.58479	FALSE
HGLibA_62647	hsa-mir-6125	24.367/0/44.623	0/0/13.734	4.683	0.4172	-2.0036	1002.3	179.24	0.31863	0.018463	0.98154	0.036925	0.58479	FALSE
HGLibB_42143	RPSA	0/16.712/14.588	0/6.3632/0	2.812	0.30131	-1.5506	169.9	107.63	0.24201	0.018475	0.98152	0.036951	0.58508	FALSE
HGLibA_28136	MAP2	0/0/19.737	0/0/0	0.48321	0	-0.56872	185.59	18.494	0.11236	0.01848	0.98152	0.036959	0.58508	FALSE
HGLibA_35081	PAM	49.75/51.529/9.4395	0/36.361/1.7168	28.964	1.7781	-3.4311	661.21	1108.6	0.81652	0.018482	0.98152	0.036964	0.58508	FALSE
HGLibA_01625	ALG2	213.21/101.67/68.651	8.1369/8.1812/21.46	114.18	11.272	-3.2304	6018.6	4370.1	1.5567	0.018484	0.98152	0.036969	0.58508	FALSE
HGLibA_48676	TBX6	58.887/38.995/87.53	0/20.908/32.619	58.583	3.9963	-3.576	610.85	2242.2	1.1528	0.018486	0.98151	0.036972	0.58508	FALSE
HGLibA_20768	H2AFZ	46.704/29.246/30.035	5.6958/19.09/0	34.491	2.1322	-3.5022	98.259	1320.1	0.89061	0.018502	0.9815	0.037003	0.58541	FALSE
HGLibB_39735	RAB11A	158.39/122.56/186.21	31.734/26.362/9.4425	153.47	19.932	-2.8836	1026.1	5874	1.7424	0.018522	0.98148	0.037043	0.58585	FALSE
HGLibA_09796	CLASP2	22.337/23.675/78.948	0/11.817/9.4425	34.706	2.1488	-3.5033	1116	1328.4	0.8933	0.018523	0.98148	0.037046	0.58585	FALSE
HGLibB_38789	PRR4	24.367/58.492/84.097	0/19.999/18.027	49.32	3.2151	-3.5775	958.1	1887.7	1.0612	0.018528	0.98147	0.037057	0.58595	FALSE
HGLibA_10478	COG4	656.9/128.13/228.26	18.715/137.26/106.44	267.85	64.958	-2.0272	86224	10252	2.0039	0.018538	0.98146	0.037076	0.58614	FALSE
HGLibB_06494	C6orf57	107.62/64.063/88.388	0/94.539/35.195	84.784	6.8384	-3.4521	481.96	3245	1.3683	0.018547	0.98145	0.037093	0.58618	FALSE
HGLibB_46609	SPIN1	142.14/59.885/12.872	0/34.543/9.4425	47.913	3.1094	-3.5732	5125.1	1833.8	1.0462	0.018566	0.98143	0.037133	0.58653	FALSE
HGLibB_01001	ADNP2	155.34/47.351/77.232	0/57.269/52.363	82.832	6.6015	-3.4631	3273.9	3170.3	1.3539	0.018571	0.98143	0.037141	0.58654	FALSE
HGLibB_56368	ZNF630	77.163/116.98/25.744	51.263/0/16.31	61.504	4.2845	-3.5641	2301	2354	1.1793	0.018572	0.98143	0.037144	0.58654	FALSE
HGLibB_11326	CSF3	71.071/135.09/46.339	34.175/0/60.947	76.35	5.8367	-3.5	2189.4	2922.2	1.3044	0.018596	0.9814	0.037192	0.58692	FALSE
HGLibA_38442	PREX1	147.22/33.424/36.042	0/18.181/32.619	56.204	3.8108	-3.5718	4604.5	2151.2	1.1296	0.01862	0.98138	0.037241	0.58723	FALSE
HGLibA_46482	SPATA31A6	0/36.209/39.474	0/0/16.31	5.1377	0.44748	-2.0842	1085.4	196.64	0.33447	0.01862	0.98138	0.03724	0.58723	FALSE
HGLibB_03919	AXIN1	213.21/249.29/260.87	61.841/49.087/45.495	240.24	51.691	-2.1949	619.01	9195	1.9663	0.018629	0.98137	0.037258	0.58734	FALSE
HGLibB_25076	KLHDC8A	39.597/32.031/44.623	13.019/0/12.018	38.395	2.4144	-3.5283	40.363	1469.5	0.9386	0.018647	0.98135	0.037294	0.58783	FALSE
HGLibB_12624	DDRGK1	0/0/18.879	0/0/0	0.47468	0	-0.5604	169.58	18.168	0.11136	0.018661	0.98134	0.037321	0.58818	FALSE
HGLibA_60921	hsa-mir-4705	195.95/38.995/72.083	0/46.36/62.664	81.994	6.5313	-3.462	7466.9	3138.2	1.3471	0.018673	0.98133	0.037346	0.58842	FALSE
HGLibA_37637	POLR3K	39.597/37.602/30.893	0/3.6361/34.336	35.83	2.2432	-3.5054	20.852	1371.4	0.90697	0.01869	0.98131	0.03738	0.58876	FALSE
HGLibA_04484	BHMT	118.79/29.246/25.744	0/10.908/24.035	44.742	2.8839	-3.5579	3042.1	1712.5	1.0115	0.018696	0.9813	0.037392	0.58876	FALSE
HGLibA_46022	SNW1	18.275/55.707/12.014	38.244/0/0.85841	23.06	1.4432	-3.2998	605.37	882.59	0.72763	0.018698	0.9813	0.037397	0.58876	FALSE
HGLibA_16478	FAM214A	23.352/73.812/22.311	0/8.1812/12.876	33.768	2.1067	-3.4843	921.62	1292.4	0.88069	0.018702	0.9813	0.037405	0.58876	FALSE
HGLibB_41063	RGS9BP	0/6.9634/80.665	0/9.9993/0	3.7496	0.36569	-1.7982	2970.1	143.51	0.28247	0.018704	0.9813	0.037407	0.58876	FALSE
HGLibB_50429	TMEM66	124.88/153.19/47.197	0/98.175/65.239	96.669	8.5272	-3.3578	3219.2	3699.9	1.4491	0.018706	0.98129	0.037412	0.58876	FALSE
HGLibA_47056	SRRT	56.857/50.136/18.021	13.833/0/10.301	37.189	2.338	-3.5161	460.94	1423.4	0.92375	0.018706	0.98129	0.037412	0.58876	FALSE
HGLibB_50642	TNF	368.55/284.11/394.74	95.202/104.54/132.19	345.75	109.58	-1.6489	3360.1	13233	2.0531	0.018733	0.98127	0.037466	0.58929	FALSE
HGLibA_19710	GP6	0/37.602/2.5744	0/0/4.292	2.0604	0.25282	-1.2885	633.86	78.859	0.20355	0.018744	0.98126	0.037487	0.58956	FALSE
HGLibA_17095	FBXO41	40.612/23.675/60.069	0/7.2722/22.319	38.662	2.4472	-3.5243	343.33	1479.8	0.94144	0.018758	0.98124	0.037517	0.58994	FALSE
HGLibB_03604	ATP2A1	118.79/181.05/218.82	0.81369/148.17/104.73	167.58	24.116	-2.7468	2593.8	6414.1	1.7914	0.018761	0.98124	0.037522	0.58995	FALSE
HGLibA_34615	ORC6	43.658/13.927/24.028	4.0685/0/10.301	24.457	1.5306	-3.3305	239.87	936.07	0.74935	0.018767	0.98123	0.037533	0.58999	FALSE
HGLibA_29054	MFAP5	118.79/122.56/107.27	0/119.99/139.06	116.02	11.767	-3.1962	63.502	4440.5	1.5645	0.018784	0.98122	0.037568	0.59028	FALSE
HGLibA_28876	MEIS3	24.367/0/0	0/0.90903/0	0.52545	0.11609	-0.45078	284.49	20.111	0.091283	0.018789	0.98121	0.037579	0.59028	FALSE
HGLibA_49730	TM9SF4	43.658/36.209/90.962	0/41.815/11.159	52.397	3.5138	-3.5644	912.83	2005.5	1.0916	0.018791	0.98121	0.037581	0.59028	FALSE
HGLibA_16883	FARSA	42.643/0/13.73	0/0/10.301	3.7955	0.37028	-1.8072	811.1	145.27	0.28418	0.018791	0.98121	0.037583	0.59028	FALSE
HGLibB_23387	INTS3	18.275/0/0	0/0/0	0.46852	0	-0.55436	158.76	17.932	0.11064	0.018794	0.98121	0.037589	0.59029	FALSE
HGLibB_48616	TBX5	24.367/6.9634/84.955	0/5.4542/7.7257	24.396	1.532	-3.3263	1985.6	933.74	0.74824	0.018829	0.98117	0.037658	0.59112	FALSE
HGLibB_26832	LOC100507462	0/18.105/0	0/0/0	0.46675	0	-0.55263	155.77	17.865	0.11043	0.018833	0.98117	0.037666	0.59112	FALSE
HGLibA_57496	hsa-mir-1268a	0/18.105/0	0/0/0	0.46675	0	-0.55263	155.77	17.865	0.11043	0.018833	0.98117	0.037666	0.59112	FALSE
HGLibB_07709	CCDC178	111.68/37.602/33.467	0/25.453/18.027	52.006	3.4913	-3.5609	2056.3	1990.5	1.0874	0.01885	0.98115	0.0377	0.59142	FALSE
HGLibB_47682	SULT1A4	304.59/282.71/199.95	43.126/27.271/189.71	258.22	60.683	-2.0712	3073	9883.2	1.987	0.018852	0.98115	0.037704	0.59142	FALSE
HGLibB_06389	C5orf47	0/0/18.021	0/0/0	0.46588	0	-0.55177	154.3	17.831	0.11033	0.018852	0.98115	0.037705	0.59142	FALSE
HGLibB_18645	GATA3	64.979/34.817/126.15	0/32.725/35.195	65.852	4.775	-3.5331	2299.6	2520.4	1.2166	0.018858	0.98114	0.037715	0.59146	FALSE
HGLibA_09443	CHIA	172.6/77.99/75.516	0/118.17/67.814	100.55	9.1957	-3.3162	3163.4	3848.6	1.4726	0.018893	0.98111	0.037787	0.59187	FALSE
HGLibA_09602	CHRND	77.163/197.76/58.353	0/41.815/153.65	96.219	8.5377	-3.3495	6053.7	3682.7	1.4449	0.018894	0.98111	0.037788	0.59187	FALSE
HGLibA_28825	MEF2A	33.505/91.916/69.509	0/16.362/48.071	59.83	4.1963	-3.5492	908.11	2289.9	1.1626	0.018895	0.98111	0.037789	0.59187	FALSE
HGLibA_54332	WLS	131.99/71.026/92.678	0/63.632/97	95.424	8.4217	-3.3553	969.89	3652.3	1.4396	0.018896	0.9811	0.037793	0.59187	FALSE
HGLibB_14882	ELF5	89.346/122.56/121.85	0/100.9/127.04	110.09	10.769	-3.2386	362.04	4213.7	1.5301	0.018904	0.9811	0.037807	0.59194	FALSE
HGLibA_24105	KBTBD3	30.459/91.916/46.339	12.205/0/34.336	50.634	3.3863	-3.5572	1064.9	1938	1.0733	0.018907	0.98109	0.037814	0.59197	FALSE
HGLibB_04825	BRK1	31.474/62.67/32.609	0/18.181/10.301	40.072	2.569	-3.5245	320.15	1533.7	0.95761	0.018922	0.98108	0.037845	0.59237	FALSE
HGLibA_33190	NYX	91.377/98.88/90.104	0/44.542/125.33	93.375	8.1423	-3.3678	22.497	3573.8	1.4257	0.018941	0.98106	0.037882	0.59288	FALSE
HGLibA_47775	SUMO1	50.765/33.424/69.509	0/20.908/18.027	49.045	3.2643	-3.5528	332.87	1877.2	1.0567	0.018959	0.98104	0.037918	0.59314	FALSE
HGLibA_63026	hsa-mir-6716	43.658/65.456/0	0/25.453/0	6.4951	0.53457	-2.2881	2449.8	248.59	0.37804	0.018961	0.98104	0.037921	0.59314	FALSE
HGLibB_12623	DDR2	188.85/100.27/31.751	0/76.358/45.495	84.433	6.938	-3.4279	6964.2	3231.6	1.3632	0.018974	0.98103	0.037949	0.59338	FALSE
HGLibB_43614	SETDB1	22.337/91.916/30.893	11.392/16.362/0	39.897	2.5646	-3.5202	1547.7	1527	0.95535	0.018985	0.98102	0.037969	0.59351	FALSE
HGLibB_09988	CLEC4M	22.337/22.283/57.495	7.3232/0/11.159	30.596	1.9294	-3.4311	430.44	1171	0.83771	0.018985	0.98102	0.037969	0.59351	FALSE
HGLibA_30454	MTOR	249.76/314.74/324.37	74.046/104.54/66.097	294.34	79.983	-1.8667	1652.7	11265	2.0196	0.018991	0.98101	0.037982	0.59351	FALSE
HGLibB_35437	PCDHB14	56.857/0/27.46	0/0/18.027	5.2944	0.46594	-2.1022	1589	202.64	0.33919	0.019004	0.981	0.038007	0.59382	FALSE
HGLibA_12236	CYTH1	17.26/0/0	0/0/0	0.45785	0	-0.54384	141.37	17.524	0.10937	0.019032	0.98097	0.038064	0.59454	FALSE
HGLibB_41980	RPP25L	26.398/44.566/0	0/0/15.451	4.8098	0.43776	-2.0147	1034.8	184.09	0.32223	0.019036	0.98096	0.038073	0.59454	FALSE
HGLibA_05641	C19orf25	83.255/34.817/42.907	0/5.4542/73.823	49.923	3.3498	-3.5493	694.21	1910.7	1.0654	0.019039	0.98096	0.038078	0.59454	FALSE
HGLibB_38926	PRSS8	488.36/509.72/195.65	68.35/139.08/193.14	365.2	122.46	-1.5686	32399	13978	2.0532	0.019043	0.98096	0.038086	0.59454	FALSE
HGLibB_41932	RPL41	0/0/19.737	0/0/0.85841	0.48321	0.11241	-0.41503	185.59	18.494	0.086222	0.019049	0.98095	0.038098	0.59454	FALSE
HGLibB_00544	ACSBG2	0/0/17.163	0/0/0	0.4568	0	-0.54281	139.75	17.484	0.10925	0.019056	0.98094	0.038112	0.5946	FALSE
HGLibA_63694	hsa-mir-6877	16.245/0/43.765	0/11.817/0	4.0543	0.39211	-1.8602	870.98	155.17	0.29399	0.019071	0.98093	0.038143	0.59493	FALSE
HGLibB_56564	ZNF726	92.392/86.346/60.069	56.958/0/43.779	78.256	6.2027	-3.4599	298.01	2995.2	1.3166	0.019076	0.98092	0.038152	0.59499	FALSE
HGLibB_00474	ACOT12	119.81/20.89/84.097	10.578/0/74.681	59.519	4.2062	-3.5391	2865.4	2278	1.1589	0.019081	0.98092	0.038162	0.595	FALSE
HGLibA_29926	MRPL21	104.58/77.99/139.88	0/132.72/75.54	104.49	9.9154	-3.2727	977.2	3999.3	1.4955	0.019094	0.98091	0.038188	0.59533	FALSE
HGLibB_55514	ZNF208	82.239/37.602/29.177	0/8.1812/34.336	44.86	2.9552	-3.5354	847.92	1717	1.0113	0.019113	0.98089	0.038227	0.59569	FALSE
HGLibA_07164	CAPN2	43.658/59.885/133.01	0/39.997/39.487	70.332	5.3144	-3.4978	2374.6	2691.9	1.2531	0.019136	0.98086	0.038272	0.59632	FALSE
HGLibA_54347	WNT10A	90.362/33.424/28.318	0/28.18/9.4425	44.071	2.8995	-3.5309	1252.2	1686.8	1.0025	0.01915	0.98085	0.0383	0.59659	FALSE
HGLibA_19871	GPR12	133/43.173/58.353	0/42.724/35.195	69.467	5.2268	-3.5004	2425.9	2658.8	1.2459	0.019159	0.98084	0.038317	0.59672	FALSE
HGLibB_14248	DYRK1A	510.7/236.75/199.95	41.498/83.63/133.91	289.16	77.471	-1.8866	29892	11067	2.0122	0.019164	0.98084	0.038328	0.5968	FALSE
HGLibA_40490	RBM15	0/16.712/0	0/0/0	0.45192	0	-0.53796	132.4	17.297	0.10866	0.019168	0.98083	0.038336	0.59686	FALSE
HGLibA_53802	VPS51	389.87/279.93/298.63	60.213/120.9/116.74	319.43	94.728	-1.743	3477.8	12226	2.0322	0.019172	0.98083	0.038344	0.5969	FALSE
HGLibA_57282	hsa-mir-1207	28.428/15.319/13.73	0/11.817/1.7168	18.155	1.1937	-3.1263	66.58	694.88	0.64345	0.019179	0.98082	0.038358	0.59696	FALSE
HGLibA_07280	CASC5	204.08/44.566/16.305	31.734/0/16.31	52.986	3.6382	-3.5409	12122	2028	1.0958	0.019201	0.9808	0.038403	0.59747	FALSE
HGLibA_38801	PRR20A	1018.3/1037.5/867.57	519.14/572.69/630.07	971.41	572.18	-0.76259	8679.2	37180	2.0705	0.019203	0.9808	0.038406	0.59747	FALSE
HGLibA_62280	hsa-mir-5690	70.056/94.702/23.17	20.342/0/26.611	53.589	3.6938	-3.5398	1443.4	2051.1	1.1017	0.019217	0.98078	0.038434	0.59759	FALSE
HGLibB_45983	SNX14	160.42/48.744/44.623	38.244/0/42.062	70.416	5.3476	-3.492	4617.6	2695.1	1.2534	0.019228	0.98077	0.038456	0.59771	FALSE
HGLibA_34481	OR7G1	90.362/84.953/65.218	0/45.451/60.088	79.405	6.3964	-3.4424	176.05	3039.2	1.3243	0.019255	0.98074	0.03851	0.59815	FALSE
HGLibA_35021	PAH	278.19/155.98/36.9	0/163.62/114.17	117.03	12.222	-3.1582	16955	4479.4	1.566	0.019268	0.98073	0.038537	0.59829	FALSE
HGLibB_54071	WDR6	0/0/16.305	0/0/0	0.44742	0	-0.53348	125.92	17.125	0.10812	0.019273	0.98073	0.038546	0.59829	FALSE
[truncated: 117,838 more rows]
