# Supplementary material for: Genome-scale CRISPR screening for modifiers of cellular LDL uptake
Source: PLOS journal article supplement (doi:10.1371/journal.pgen.1009285), 2021-01-29
Supplement: S9 (10.1371/journal.pgen.1009285.s009) [file journal.pgen.1009285.s009.xlsx]

## Sheet: annotation
Primary screen of LDL uptake in HuH7 cells cultured under lipoprotein-rich or lipoprotein-depleted conditions
Output files from MAGeCK analysis
control = LDLlow sorted cells
treatment = LDLhigh sorted cells
Gene-level analysis
id	gene ID
num	number of individual gRNAs detected for a given gene
neg|score	MAGeCK significance score for depletion in LDLhigh cells (low score indicates gene disruption reduces LDL uptake)
neg|p-value	p-value for depletion in LDLhigh cells (gene disruption reduces LDL uptake)
neg|fdr	FDR for depletion in LDLhigh cells (gene disruption reduces LDL uptake)
neg|rank	gene rank for depletion in LDLhigh cells (gene disruption reduces LDL uptake)
neg|goodsgrna	number of gene-targeting gRNA with significant depletion in LDLhigh cells (gene disruption reduces LDL uptake)
neg|lfc	composite log2 fold change of gene-targeting gRNA (negative value indicates gene disruption reduces LDL uptake)
pos|score	MAGeCK significance score for enrichment in LDLhigh cells (low score indicates gene disruption increases LDL uptake)
pos|p-value	p-value for enrichment in LDLhigh cells (gene disruption increases LDL uptake)
pos|fdr	FDR for enrichment in LDLhigh cells (gene disruption increases LDL uptake)
pos|rank	gene rank for enrichment in LDLhigh cells (gene disruption increases LDL uptake)
pos|goodsgrna	number of gene-targeting gRNA with significant enrichment in LDLhigh cells (gene disruption increases LDL uptake)
pos|lfc	composite log2 fold change of gene-targeting gRNA (positive value indicates gene disruption increases LDL uptake)
gRNA-level analysis
sgrna	GeCKO library gRNA identifier
gene	targeted gene
control_count	individual replicate normalized read counts in LDLlow cells
treatment_count	individual replicate normalized read counts in LDLhigh cells
control_mean	mean normalized read counts in LDLlow cells
treat_mean	mean normalized read counts in LDLhigh cells
LFC	log2 fold change of normalized read counts in LDLhigh relative to LDLlow cells
control_var	raw variance in LDLlow cells
adj_var	adjusted variance in LDLlow cells
score	MAGeCK significance score for individual gRNA
p.low	p-value for depletion in LDLhigh cells (gene disruption reduces LDL uptake)
p.high	p-value for enrichment in LDLhigh cells (gene disruption increases LDL uptake)
p.twosided	minimum p-value for either enrichment or depletion
FDR	FDR for p.twosided
high_in_treatment	whether normalized read counts for gRNA are higher in LDLhigh than LDLlow cells (gene disruption increases LDL uptake)

## Sheet: LP-depl_gene
id	num	neg|score	neg|p-value	neg|fdr	neg|rank	neg|goodsgrna	neg|lfc	pos|score	pos|p-value	pos|fdr	pos|rank	pos|goodsgrna	pos|lfc
HAVCR1	6	5.88e-11	2.29e-07	0.000619	1	6	-2.0895	1	1	1	21663	0	-2.0895
GAGE1	6	8.7e-11	2.29e-07	0.000619	2	4	-0.83829	0.53441	0.56582	1	12175	1	-0.83829
EXOC8	6	9.63e-10	2.29e-07	0.000619	3	5	-2.6702	0.99897	0.99895	1	21600	0	-2.6702
SCAP	6	1.01e-09	2.29e-07	0.000619	4	6	-3.4016	1	1	1	21661	0	-3.4016
ELOF1	6	1.9e-09	2.29e-07	0.000619	5	4	-2.2074	0.80186	0.80169	1	17206	0	-2.2074
LDLR	6	2.31e-08	2.29e-07	0.000619	6	5	-1.7995	0.98148	0.98131	1	21151	0	-1.7995
TAF2	6	2.91e-08	2.29e-07	0.000619	7	5	-1.4543	0.12779	0.22336	0.992328	4847	1	-1.4543
GET4	6	4.48e-08	2.29e-07	0.000619	8	5	-1.9331	0.23666	0.34294	0.999833	7419	1	-1.9331
CSNK1A1	6	1.25e-07	6.86e-07	0.001485	9	3	-1.0233	0.79491	0.79472	1	17050	0	-1.0233
EXOC7	6	1.84e-07	6.86e-07	0.001485	10	6	-1.3995	1	1	1	21662	0	-1.3995
CDIPT	6	3.46e-07	1.14e-06	0.00225	11	5	-3.1199	0.84964	0.84967	1	18244	0	-3.1199
CHD7	6	4.17e-07	2.06e-06	0.003713	12	4	-1.2934	0.26707	0.3761	1	8135	2	-1.2934
GTF3C4	6	5.38e-07	2.97e-06	0.00495	13	5	-1.7354	0.99544	0.99543	1	21499	0	-1.7354
HNRNPU	6	5.86e-07	3.43e-06	0.00526	14	6	-3.7351	1	1	1	21660	0	-3.7351
CPSF4	6	6.82e-07	3.88e-06	0.00526	15	5	-1.6997	0.99796	0.99795	1	21565	0	-1.6997
DPAGT1	6	7.41e-07	3.88e-06	0.00526	16	5	-2.0815	0.89801	0.89785	1	19309	0	-2.0815
ACTR3	6	9.62e-07	4.8e-06	0.006115	17	5	-1.8009	0.9937	0.99365	1	21460	0	-1.8009
GMPPB	6	1.04e-06	5.26e-06	0.006326	18	3	-1.5013	0.0022831	0.0082764	0.87035	206	2	-1.5013
DCPS	6	1.12e-06	6.17e-06	0.007035	19	5	-1.7052	0.97209	0.97198	1	20925	0	-1.7052
TMEM165	6	1.81e-06	9.37e-06	0.010149	20	4	-2.1693	0.66099	0.66481	1	14264	1	-2.1693
NCBP1	6	2.06e-06	1.07e-05	0.010977	21	5	-1.8357	0.99986	0.99987	1	21647	0	-1.8357
STX4	6	2.15e-06	1.12e-05	0.010977	22	5	-2.1142	0.9995	0.99948	1	21623	0	-2.1142
LOC100132247	6	2.28e-06	1.17e-05	0.010977	23	4	-0.99597	0.86001	0.85997	1	18482	0	-0.99597
USP22	6	2.68e-06	1.49e-05	0.013408	24	4	-1.2439	0.98137	0.98119	1	21148	0	-1.2439
RPP38	6	3.31e-06	1.71e-05	0.014851	25	5	-1.9581	0.99946	0.99944	1	21619	0	-1.9581
WDR61	6	3.52e-06	1.9e-05	0.015804	26	4	-1.1107	0.94906	0.94907	1	20385	0	-1.1107
FNTB	6	4.78e-06	2.45e-05	0.019619	27	5	-1.6018	0.46931	0.52214	1	11249	1	-1.6018
MARS2	6	5.54e-06	2.81e-05	0.02168	28	5	-1.7034	0.99869	0.99868	1	21590	0	-1.7034
RABIF	6	5.82e-06	2.9e-05	0.02168	29	4	-0.70055	0.87057	0.87051	1	18695	0	-0.70055
COMMD3	6	5.95e-06	3.04e-05	0.021878	30	6	-1.0716	0.99992	0.99993	1	21652	0	-1.0716
SEC61B	6	6.14e-06	3.13e-05	0.021878	31	4	-1.1617	0.4642	0.51882	1	11174	1	-1.1617
CTCF	6	7.15e-06	3.59e-05	0.024288	32	5	-1.5611	0.8203	0.82024	1	17603	0	-1.5611
SUMO2	6	7.67e-06	3.77e-05	0.02447	33	5	-1.5241	0.083735	0.17094	0.985034	3759	1	-1.5241
UXT	6	7.9e-06	3.86e-05	0.02447	34	4	-2.5118	0.051039	0.11262	0.970452	2510	1	-2.5118
WDR82	6	8.5e-06	3.95e-05	0.02447	35	6	-1.3292	0.99999	0.99999	1	21659	0	-1.3292
ATP11A	6	9.93e-06	4.59e-05	0.02764	36	4	-2.2839	0.8847	0.88442	1	19025	0	-2.2839
GAGE12B	2	1.27e-05	6.15e-05	0.035991	37	2	-1.3172	0.99999	0.99999	1	21658	0	-1.3172
C1GALT1	6	1.45e-05	6.79e-05	0.038208	38	2	-0.37877	0.57596	0.59592	1	12811	1	-0.37877
MBTPS1	6	1.47e-05	6.88e-05	0.038208	39	3	-0.53555	0.90129	0.90113	1	19374	0	-0.53555
EMC6	6	1.63e-05	7.56e-05	0.040965	40	6	-0.99289	0.99998	0.99999	1	21657	0	-0.99289
CTR9	6	1.68e-05	8.07e-05	0.042623	41	4	-1.1415	0.9968	0.99676	1	21536	0	-1.1415
INTS8	6	1.77e-05	8.52e-05	0.043288	42	4	-2.1482	0.3941	0.4764	1	10242	1	-2.1482
RAB10	6	1.78e-05	8.59e-05	0.043288	43	4	-1.26	0.88641	0.88612	1	19064	0	-1.26
SNAI1	6	1.81e-05	8.89e-05	0.043767	44	5	-0.99064	0.92706	0.92717	1	19923	0	-0.99064
KIAA1432	6	1.89e-05	9.48e-05	0.045655	45	4	-1.2427	0.30761	0.4203	1	9034	1	-1.2427
NCBP2	6	2.07e-05	0.00010215	0.048106	46	6	-1.5181	0.99998	0.99998	1	21656	0	-1.5181
ALG2	6	2.19e-05	0.00010992	0.050227	47	4	-1.0737	0.94936	0.94938	1	20391	0	-1.0737
SLC35A2	6	2.22e-05	0.00011129	0.050227	48	5	-1.4675	0.9844	0.98428	1	21216	0	-1.4675
DHX36	6	2.42e-05	0.00011906	0.052637	49	6	-2.5916	0.99998	0.99998	1	21655	0	-2.5916
UVRAG	6	2.94e-05	0.00014603	0.063267	50	4	-1.8194	0.96955	0.96943	1	20870	0	-1.8194
SNF8	6	3e-05	0.00014923	0.063386	51	6	-0.92011	0.99997	0.99997	1	21654	0	-0.92011
EIF3C	6	3.21e-05	0.00015837	0.065975	52	3	-0.53135	0.60196	0.61585	1	13222	1	-0.53135
SPDYE1	6	3.45e-05	0.00017345	0.070315	53	3	-0.53097	0.21766	0.32235	0.999387	6978	2	-0.53097
ELP5	6	3.51e-05	0.00017528	0.070315	54	4	-2.3526	0.60077	0.61494	1	13201	1	-2.3526
DNASE2	6	3.78e-05	0.00019676	0.077498	55	6	-0.77416	0.99996	0.99996	1	21653	0	-0.77416
USO1	6	4.09e-05	0.0002123	0.081451	56	5	-1.0432	0.83151	0.83135	1	17839	0	-1.0432
NHLRC2	6	4.21e-05	0.00021778	0.081451	57	5	-1.9632	0.55753	0.58227	1	12522	1	-1.9632
MBTPS2	6	4.25e-05	0.0002187	0.081451	58	4	-1.1458	0.96086	0.96075	1	20670	0	-1.1458
PPIAL4A	6	4.45e-05	0.00022601	0.081451	59	4	-0.8285	0.9242	0.92429	1	19867	0	-0.8285
SRCAP	6	4.5e-05	0.00022807	0.081451	60	2	-0.18569	0.2387	0.34513	0.999833	7473	1	-0.18569
TAF8	6	4.6e-05	0.00023378	0.081451	61	4	-1.8808	0.93686	0.93694	1	20132	0	-1.8808
SSX2	6	4.72e-05	0.00023972	0.081451	62	3	-1.2048	0.34614	0.44945	1	9645	1	-1.2048
DHRSX_X	6	4.77e-05	0.00024063	0.081451	63	4	-0.59966	0.92684	0.92694	1	19917	0	-0.59966
SLC35B2	6	4.77e-05	0.00024063	0.081451	64	5	-1.1083	0.90093	0.90076	1	19363	0	-1.1083
CHMP1A	6	5.46e-05	0.00027217	0.090708	65	4	-0.61127	0.7357	0.7355	1	15765	0	-0.61127
EXOC2	6	6.34e-05	0.00031102	0.100248	66	3	-0.80361	0.93643	0.93652	1	20125	0	-0.80361
NELFB	6	6.36e-05	0.00031148	0.100248	67	5	-2.1147	0.61107	0.62307	1	13376	1	-2.1147
ACTR6	6	6.45e-05	0.00031468	0.100248	68	2	-0.53003	0.9493	0.94931	1	20389	0	-0.53003
SYS1	6	6.98e-05	0.0003421	0.107404	69	4	-0.99907	0.98667	0.98654	1	21269	0	-0.99907
NCOR1	6	7.29e-05	0.00035512	0.109901	70	5	-0.87063	0.99986	0.99986	1	21644	0	-0.87063
ZNF548	6	7.61e-05	0.00036632	0.110217	71	4	-0.93959	0.91426	0.91426	1	19658	0	-0.93959
hsa-mir-1976	4	7.61e-05	0.00036632	0.110217	72	2	-2.0379	0.9139	0.9139	1	19648	0	-2.0379
ARPC4	6	7.83e-05	0.00037775	0.110717	73	3	-0.98297	0.96342	0.96331	1	20723	0	-0.98297
ASH2L	6	7.83e-05	0.00037821	0.110717	74	5	-1.6145	0.99982	0.99983	1	21641	0	-1.6145
MTA2	6	8.1e-05	0.00038963	0.111451	75	4	-1.154	0.3777	0.46697	1	10037	1	-1.154
AP2M1	6	8.14e-05	0.000391	0.111451	76	5	-1.567	0.99899	0.99897	1	21601	0	-1.567
RPS14	6	8.61e-05	0.0004102	0.115404	77	4	-1.3669	0.72135	0.72126	1	15484	0	-1.3669
VPS51	6	8.92e-05	0.0004262	0.118368	78	5	-1.0631	0.95445	0.95442	1	20507	0	-1.0631
CACNA1A	6	9.07e-05	0.00043214	0.118499	79	6	-0.73146	0.99991	0.99991	1	21651	0	-0.73146
CHRND	6	9.25e-05	0.00044128	0.119493	80	5	-0.6116	0.13378	0.23009	0.992328	4981	1	-0.6116
CHAF1B	6	9.42e-05	0.00045499	0.121684	81	5	-1.1855	0.99963	0.99962	1	21632	0	-1.1855
MAP1S	6	9.73e-05	0.00046687	0.12334	82	4	-0.8795	0.99917	0.99915	1	21609	0	-0.8795
RAB7A	6	9.9e-05	0.00047601	0.12424	83	6	-1.2798	0.9999	0.99991	1	21650	0	-1.2798
PFDN2	6	0.00010064	0.00048424	0.124882	84	2	-1.0245	0.88323	0.88299	1	18993	0	-1.0245
JAK1	6	0.00010466	0.00050298	0.128189	85	5	-0.75821	0.99965	0.99964	1	21634	0	-0.75821
CPSF2	6	0.00010587	0.00050983	0.128315	86	3	-0.48418	0.5607	0.58457	1	12564	1	-0.48418
ST6GAL1	6	0.00010761	0.00051532	0.128315	87	4	-0.88643	0.98824	0.98815	1	21316	0	-0.88643
USP9X	6	0.00011179	0.00054091	0.133157	88	6	-0.64277	0.99989	0.99989	1	21649	0	-0.64277
TAF10	6	0.00011869	0.00057748	0.140561	89	6	-0.63414	0.99988	0.99989	1	21648	0	-0.63414
ARL8A	6	0.00012103	0.00059028	0.140627	90	4	-0.81116	0.99574	0.99574	1	21509	0	-0.81116
XAGE1A	6	0.00012112	0.00059073	0.140627	91	5	-0.42341	0.99918	0.99916	1	21610	0	-0.42341
SPNS1	6	0.00012295	0.0005985	0.140928	92	4	-0.87531	0.99909	0.99906	1	21604	0	-0.87531
hsa-mir-6515	4	0.0001297	0.0006241	0.145374	93	4	-1.5118	0.99947	0.99945	1	21621	0	-1.5118
WDR7	6	0.00013116	0.00063324	0.145934	94	4	-1.1814	0.99956	0.99954	1	21625	0	-1.1814
RAB13	6	0.00014682	0.00069037	0.157426	95	5	-0.85773	0.20699	0.31085	0.997037	6754	1	-0.85773
AGPAT1	6	0.00014931	0.00069859	0.157642	96	3	-0.29325	0.93478	0.93487	1	20082	0	-0.29325
CERS2	6	0.00015675	0.00073013	0.16306	97	5	-1.1966	0.72264	0.72259	1	15509	0	-1.1966
UBE2G2	6	0.00016792	0.00077766	0.171903	98	4	-1.098	0.70243	0.70263	1	15093	1	-1.098
AQP10	6	0.00017069	0.00078863	0.172567	99	4	-0.77744	0.52403	0.55856	1	12039	1	-0.77744
WNT3A	6	0.00017577	0.00081103	0.175693	100	5	-0.62242	0.95428	0.95424	1	20503	0	-0.62242
CCDC115	6	0.0001831	0.00084759	0.181788	101	4	-1.5128	0.87076	0.8707	1	18701	0	-1.5128
KTI12	6	0.00018667	0.00086176	0.181788	102	4	-0.81545	0.28968	0.40072	1	8638	2	-0.81545
ATP6V1H	6	0.00018868	0.00087273	0.181788	103	5	-1.28	0.12577	0.2211	0.992328	4792	1	-1.28
AGAP4	6	0.00018868	0.00087273	0.181788	104	5	-0.83197	0.94682	0.94689	1	20330	0	-0.83197
RPL17	6	0.00020233	0.00093123	0.192126	105	4	-1.0359	0.93312	0.93319	1	20051	0	-1.0359
ZNF232	6	0.00021212	0.00096917	0.198067	106	2	-1.0594	0.065941	0.13967	0.977122	3086	1	-1.0594
EXOC1	6	0.00021806	0.00099522	0.20149	107	5	-0.71909	0.99977	0.99977	1	21637	0	-0.71909
PTPMT1	6	0.0002236	0.0010172	0.203697	108	3	-1.0026	0.90587	0.90577	1	19502	0	-1.0026
GDI2	6	0.00022599	0.0010249	0.203697	109	4	-1.2429	0.35354	0.45345	1	9734	1	-1.2429
PON1	6	0.00023318	0.0010551	0.207786	110	3	-0.49201	0.76228	0.7621	1	16335	0	-0.49201
PGA3	6	0.00025146	0.0011337	0.217176	111	5	-0.56803	0.89786	0.8977	1	19305	0	-0.56803
hsa-mir-1302-6	4	0.00025174	0.0011342	0.217176	112	4	-1.656	0.99975	0.99975	1	21636	0	-1.656
GIGYF2	6	0.00025216	0.001136	0.217176	113	5	-1.3405	0.93448	0.93457	1	20075	0	-1.3405
ALG8	6	0.00025522	0.0011447	0.217176	114	3	-0.79032	0.76234	0.76216	1	16338	0	-0.79032
SNAPC2	6	0.00025728	0.0011529	0.217176	115	3	-1.8094	0.99668	0.99663	1	21532	0	-1.8094
IPO9	6	0.00026983	0.0011986	0.222814	116	3	-0.89864	0.86312	0.86311	1	18538	0	-0.89864
CDC73	6	0.00027177	0.0012045	0.222814	117	5	-1.7465	0.99924	0.99922	1	21614	0	-1.7465
SMC1A	6	0.00027428	0.0012137	0.222814	118	4	-1.3543	0.98757	0.98744	1	21292	0	-1.3543
STAG2	6	0.00028947	0.0012731	0.231758	119	5	-0.96951	0.86147	0.86144	1	18503	0	-0.96951
CCZ1	6	0.00030561	0.0013366	0.240529	120	2	-0.24892	0.60706	0.61992	1	13303	1	-0.24892
INO80D	6	0.00030736	0.0013435	0.240529	121	5	-0.66398	0.74811	0.74791	1	16041	0	-0.66398
UBE2I	6	0.0003306	0.0014335	0.254545	122	5	-1.1415	0.48739	0.53383	1	11502	1	-1.1415
SPDYE2	4	0.00033602	0.0014509	0.255534	123	3	-0.8716	0.6364	0.64372	1	13820	0	-0.8716
DYRK1A	6	0.00034395	0.0014856	0.259542	124	5	-0.85423	0.99986	0.99986	1	21645	0	-0.85423
MED26	6	0.00035596	0.0015332	0.265703	125	3	-1.3957	0.88415	0.88388	1	19015	0	-1.3957
PRPF6	6	0.00035958	0.0015505	0.26658	126	4	-0.86631	0.99367	0.99361	1	21458	0	-0.86631
FDX1L	6	0.00036725	0.0015821	0.269609	127	4	-1.3155	0.97254	0.97243	1	20939	0	-1.3155
ATP6V1B1	6	0.00037046	0.001593	0.269609	128	5	-1.1075	0.994	0.99396	1	21466	0	-1.1075
ARGLU1	6	0.00038209	0.0016397	0.274676	129	4	-1.4342	0.91553	0.91557	1	19683	0	-1.4342
ALG13	6	0.00038519	0.0016483	0.274676	130	3	-0.17561	0.23345	0.3395	0.999833	7349	2	-0.17561
ARFRP1	6	0.00040287	0.0017142	0.282066	131	4	-1.5663	0.95939	0.95933	1	20623	0	-1.5663
HSPA8	6	0.00040447	0.0017187	0.282066	132	5	-2.7782	0.98907	0.98899	1	21340	0	-2.7782
GTF2A2	6	0.00041459	0.0017594	0.28657	133	2	-0.26223	0.3268	0.43894	1	9395	1	-0.26223
MORC2	6	0.00042562	0.001812	0.292929	134	4	-1.2392	0.85149	0.85148	1	18283	0	-1.2392
CEBPA	6	0.00043434	0.0018554	0.295297	135	4	-1.7334	0.99759	0.99755	1	21556	0	-1.7334
C2orf49	6	0.00043803	0.0018675	0.295297	136	4	-2.0863	0.34702	0.44994	1	9659	1	-2.0863
DET1	6	0.0004403	0.0018759	0.295297	137	5	-1.6587	0.9988	0.99878	1	21594	0	-1.6587
RBBP5	6	0.00044235	0.0018828	0.295297	138	4	-0.92957	0.98901	0.98893	1	21339	0	-0.92957
METTL14	6	0.00044675	0.0019057	0.295297	139	4	-1.4084	0.92981	0.92989	1	19987	0	-1.4084
HNF4A	6	0.00044713	0.0019084	0.295297	140	4	-1.1298	0.99853	0.99852	1	21583	0	-1.1298
CMTR1	6	0.00045047	0.0019244	0.29566	141	4	-0.77686	0.79598	0.79576	1	17074	0	-0.77686
MED9	6	0.00046873	0.0020003	0.305153	142	4	-1.1715	0.71408	0.71397	1	15312	1	-1.1715
SPAG7	6	0.00048193	0.0020629	0.310559	143	3	-0.59519	0.71259	0.71252	1	15278	1	-0.59519
NELFA	6	0.00048764	0.0020825	0.310559	144	5	-0.61485	0.97546	0.97533	1	21002	0	-0.61485
PTAR1	6	0.00048877	0.0020871	0.310559	145	4	-1.3048	0.79578	0.79556	1	17069	0	-1.3048
MED27	6	0.00049038	0.002093	0.310559	146	4	-0.87375	0.97223	0.97213	1	20929	0	-0.87375
GSK3B	6	0.00050059	0.0021305	0.313969	147	2	-0.26663	0.72829	0.72817	1	15636	0	-0.26663
HIST2H2AA3	6	0.00051064	0.0021717	0.31733	148	3	-0.6534	0.80745	0.80731	1	17320	0	-0.6534
GNB2L1	6	0.00051283	0.0021826	0.31733	149	5	-1.2874	0.99986	0.99986	1	21646	0	-1.2874
METTL17	6	0.00052433	0.0022219	0.320891	150	3	-0.59958	0.014899	0.043627	0.922609	1023	1	-0.59958
SNX19	6	0.00054137	0.0022932	0.327873	151	2	-0.16895	0.96989	0.96977	1	20881	0	-0.16895
GPN1	6	0.0005436	0.0023005	0.327873	152	3	-0.74337	0.11124	0.20476	0.990864	4472	2	-0.74337
hsa-mir-6770-1	4	0.00055237	0.0023398	0.329895	153	1	-0.018888	0.75775	0.75755	1	16238	0	-0.018888
ZBTB37	6	0.00055481	0.0023504	0.329895	154	3	-0.66421	0.57115	0.59234	1	12743	1	-0.66421
EIF3F	6	0.00055669	0.0023604	0.329895	155	4	-1.6898	0.96076	0.96067	1	20668	0	-1.6898
COX5B	6	0.00057935	0.0024459	0.337537	156	5	-1.0766	0.98859	0.98851	1	21331	0	-1.0766
ISG20	6	0.00058214	0.0024573	0.337537	157	4	-0.74224	0.99858	0.99858	1	21587	0	-0.74224
LOC388849	6	0.00058622	0.0024724	0.337537	158	3	-0.52619	0.99426	0.99421	1	21472	0	-0.52619
TOMM22	6	0.00058781	0.0024774	0.337537	159	5	-1.2572	0.99957	0.99955	1	21626	0	-1.2572
INTS1	6	0.00060548	0.0025496	0.344304	160	4	-0.81458	0.83306	0.83292	1	17875	0	-0.81458
PPAT	6	0.00061201	0.0025739	0.344304	161	5	-1.0521	0.73206	0.73192	1	15703	0	-1.0521
PPP1CB	6	0.00061249	0.0025748	0.344304	162	4	-0.98622	0.87728	0.87714	1	18867	0	-0.98622
PDGFA	6	0.00062277	0.0026086	0.346687	163	5	-0.72677	0.90312	0.90297	1	19422	0	-0.72677
RPL28	6	0.00066296	0.0027763	0.366729	164	5	-1.9055	0.97096	0.97081	1	20906	0	-1.9055
PQBP1	6	0.00067985	0.0028417	0.369434	165	4	-1.2532	0.8509	0.85089	1	18267	0	-1.2532
UBA2	6	0.00068139	0.0028467	0.369434	166	2	-0.20421	0.020441	0.054986	0.941004	1265	1	-0.20421
VPS72	6	0.00068306	0.0028549	0.369434	167	5	-1.4928	0.97959	0.9794	1	21105	0	-1.4928
WRB	6	0.0006914	0.0028883	0.369434	168	2	0.13723	0.84758	0.84756	1	18202	0	0.13723
WDR37	6	0.00069724	0.0029075	0.369434	169	5	-0.99248	0.41039	0.48598	1	10471	1	-0.99248
C11orf57	6	0.00069811	0.0029098	0.369434	170	3	-0.72567	0.67604	0.67811	1	14550	1	-0.72567
HYPK	6	0.00070044	0.0029162	0.369434	171	5	-0.81836	0.99984	0.99984	1	21643	0	-0.81836
ACO2	6	0.00070709	0.0029381	0.369627	172	5	-1.1338	0.962	0.96186	1	20690	0	-1.1338
COPS8	6	0.00071082	0.0029518	0.369627	173	4	-1.0021	0.9314	0.93147	1	20020	0	-1.0021
ANKRD35	6	0.00072103	0.0029902	0.372283	174	5	-0.64033	0.72678	0.72663	1	15597	0	-0.64033
NonTargetingControlGuideForHuman_0853	1	0.00074083	0.0030634	0.378685	175	1	-1.641	0.99926	0.99924	1	21615	0	-1.641
NXPH2	6	0.00074334	0.0030766	0.378685	176	5	-0.76597	0.99983	0.99984	1	21642	0	-0.76597
PFDN6	6	0.00075295	0.0031145	0.381188	177	3	-0.93152	0.9862	0.98608	1	21258	0	-0.93152
DARS	6	0.00075932	0.0031424	0.38244	178	4	-0.62174	0.46366	0.51845	1	11169	1	-0.62174
CDC23	6	0.00077361	0.0032	0.387273	179	5	-0.87778	0.92742	0.92753	1	19936	0	-0.87778
NUDT21	6	0.00078437	0.0032425	0.390237	180	5	-1.2035	0.97532	0.97518	1	20996	0	-1.2035
TMEM30A	6	0.00079004	0.0032686	0.391199	181	3	-0.39277	0.90349	0.90334	1	19435	0	-0.39277
SETDB1	6	0.0008138	0.0033549	0.396497	182	4	-0.99113	0.65876	0.66287	1	14224	1	-0.99113
ALG14	6	0.00081775	0.0033673	0.396497	183	3	-1.0635	0.40117	0.48055	1	10350	1	-1.0635
hsa-mir-6859-1	4	0.00081793	0.0033677	0.396497	184	4	-1.2843	0.99918	0.99917	1	21612	0	-1.2843
ANKHD1-EIF4EBP3	4	0.00084349	0.0034774	0.407198	185	4	-0.85163	0.99916	0.99914	1	21608	0	-0.85163
UBA3	6	0.00085847	0.0035419	0.412515	186	3	-0.49981	0.69292	0.69366	1	14907	1	-0.49981
NDUFA13	6	0.00089508	0.003674	0.423899	187	3	-1.2424	0.96614	0.96607	1	20787	0	-1.2424
MEF2B	6	0.00089728	0.0036836	0.423899	188	4	-0.61904	0.99848	0.99848	1	21580	0	-0.61904
MGAT1	6	0.00090409	0.003706	0.423899	189	3	-0.87574	0.98178	0.9816	1	21160	0	-0.87574
DNAJC4	6	0.00091195	0.0037357	0.423899	190	5	-0.75825	0.88633	0.88604	1	19062	0	-0.75825
ICA1L	6	0.000918	0.0037608	0.423899	191	4	-0.80204	0.22499	0.33027	0.999387	7150	1	-0.80204
KCNU1	6	0.00091863	0.0037654	0.423899	192	3	-0.17477	0.21017	0.31437	0.998581	6812	2	-0.17477
EXOC4	6	0.00092881	0.0038061	0.423899	193	4	-1.0804	0.78387	0.78372	1	16810	0	-1.0804
COPS6	6	0.00092964	0.0038102	0.423899	194	3	-0.22753	0.08276	0.16923	0.985034	3720	2	-0.22753
DNAJC13	6	0.00093351	0.0038284	0.423899	195	4	-0.7049	0.95847	0.9584	1	20604	0	-0.7049
SREBF1	6	0.00093545	0.0038353	0.423899	196	2	-0.8284	0.88047	0.88027	1	18934	0	-0.8284
EIF5A	6	0.00094265	0.0038668	0.424772	197	5	-1.5242	0.81105	0.81092	1	17404	0	-1.5242
EPN1	6	0.00094909	0.0038897	0.424772	198	3	-1.3517	0.63179	0.63993	1	13739	1	-1.3517
GCFC2	6	0.0009525	0.003902	0.424772	199	4	-0.82174	0.26675	0.37573	1	8132	1	-0.82174
KDM8	6	0.00096085	0.0039377	0.42651	200	5	-0.81323	0.98421	0.9841	1	21207	0	-0.81323
SLC7A6OS	6	0.00096645	0.0039587	0.426654	201	4	-1.0926	0.12842	0.22406	0.992328	4857	1	-1.0926
INTS2	6	0.0009751	0.0039953	0.427718	202	3	-0.53736	0.88009	0.87992	1	18923	0	-0.53736
TMOD2	6	0.00097793	0.0040081	0.427718	203	5	-0.6971	0.99467	0.99463	1	21480	0	-0.6971
SLC38A5	6	0.00098362	0.0040282	0.427757	204	5	-0.79125	0.53822	0.56846	1	12220	1	-0.79125
UBE2L3	6	0.0010022	0.004088	0.429019	205	5	-0.63273	0.99962	0.9996	1	21631	0	-0.63273
hsa-mir-7973-1	4	0.0010036	0.0040944	0.429019	206	3	-0.52199	0.86491	0.86492	1	18576	0	-0.52199
SCARB1	6	0.0010054	0.0040995	0.429019	207	4	-0.66743	0.75077	0.75058	1	16103	0	-0.66743
S100A14	6	0.0010109	0.0041223	0.429336	208	5	-0.94959	0.44326	0.50575	1	10881	1	-0.94959
CDK12	6	0.0010213	0.0041593	0.431119	209	3	-0.71755	0.7694	0.76924	1	16489	0	-0.71755
VPS29	6	0.0010515	0.004275	0.440995	210	5	-0.724	0.99652	0.99647	1	21527	0	-0.724
NID1	6	0.0010603	0.0043079	0.442283	211	3	-0.29927	0.51123	0.54982	1	11852	1	-0.29927
HIST2H3A	6	0.0010758	0.0043591	0.444778	212	4	-0.74525	0.99851	0.9985	1	21582	0	-0.74525
PRPF38B	6	0.0010801	0.0043732	0.444778	213	4	-1.6725	0.91586	0.9159	1	19701	0	-1.6725
ZBTB10	6	0.0010967	0.0044324	0.445657	214	3	-0.7545	0.74418	0.74395	1	15954	0	-0.7545
RBM14	6	0.0011022	0.0044523	0.445657	215	4	-1.1919	0.53573	0.56673	1	12192	1	-1.1919
TMEM199	6	0.0011056	0.0044656	0.445657	216	4	-1.364	0.9963	0.99626	1	21521	0	-1.364
MED20	6	0.0011146	0.0045003	0.445657	217	4	-0.88997	0.98787	0.98776	1	21301	0	-0.88997
VPS35	6	0.001116	0.0045076	0.445657	218	4	-0.65653	0.77424	0.77406	1	16579	0	-0.65653
TAF1B	6	0.0011202	0.0045213	0.445657	219	2	-0.22027	0.79028	0.79017	1	16938	0	-0.22027
hsa-mir-3680-1	4	0.0011216	0.0045259	0.445657	220	2	-0.39271	0.31858	0.43254	1	9276	1	-0.39271
NARF	6	0.0011486	0.0046328	0.449815	221	5	-0.47949	0.62751	0.6364	1	13663	1	-0.47949
KAT8	6	0.0011599	0.0046863	0.449815	222	4	-0.91292	0.85035	0.85034	1	18255	0	-0.91292
UBE2Q1	6	0.0011674	0.0047105	0.449815	223	4	-1.0634	0.7762	0.77602	1	16633	0	-1.0634
STOML3	6	0.0011738	0.0047357	0.449815	224	5	-0.88232	0.89373	0.89356	1	19217	0	-0.88232
HNRNPM	6	0.0011752	0.0047416	0.449815	225	4	-0.75	0.21585	0.32041	0.999387	6943	1	-0.75
NMT1	6	0.0011756	0.0047435	0.449815	226	4	-1.1999	0.6378	0.64486	1	13846	1	-1.1999
GTF2H2	6	0.0011797	0.0047608	0.449815	227	3	-0.3694	0.34023	0.44621	1	9561	1	-0.3694
MED1	6	0.0011798	0.0047617	0.449815	228	4	-0.77999	0.9988	0.99878	1	21595	0	-0.77999
MSTO1	6	0.0011937	0.0048138	0.449815	229	5	-1.1199	0.99834	0.99833	1	21573	0	-1.1199
PRELP	6	0.001195	0.0048184	0.449815	230	3	-0.41964	0.091691	0.18259	0.988043	3999	1	-0.41964
ARIH1	6	0.0012003	0.0048358	0.449815	231	5	-0.85873	0.99789	0.99787	1	21563	0	-0.85873
CARS	6	0.0012008	0.0048371	0.449815	232	3	-0.72873	0.86637	0.86636	1	18606	0	-0.72873
NonTargetingControlGuideForHuman_0541	1	0.0012012	0.0048381	0.449815	233	1	-1.0905	0.9988	0.99878	1	21593	0	-1.0905
FBXL8	6	0.0012086	0.0048591	0.449839	234	5	-0.78664	0.99028	0.99022	1	21369	0	-0.78664
WARS	6	0.0012373	0.0049624	0.455341	235	3	-0.86337	0.96786	0.96778	1	20827	0	-0.86337
AMTN	6	0.0012398	0.004972	0.455341	236	4	-0.68256	0.9855	0.98539	1	21242	0	-0.68256
PAGE4	6	0.0012415	0.0049816	0.455341	237	4	-0.68611	0.12869	0.22436	0.992328	4864	1	-0.68611
MPDU1	6	0.0012945	0.0051818	0.466874	238	5	-1.0311	0.66353	0.66708	1	14314	1	-1.0311
OR52B2	6	0.0013041	0.0052192	0.466874	239	3	-0.67751	0.98479	0.98466	1	21224	0	-0.67751
hsa-mir-532	4	0.0013115	0.0052521	0.466874	240	4	-0.69733	0.99869	0.99868	1	21591	0	-0.69733
CABIN1	6	0.0013142	0.005264	0.466874	241	4	-1.3054	0.76413	0.76398	1	16374	0	-1.3054
TMEM221	6	0.0013194	0.0052878	0.466874	242	3	-0.58575	0.54732	0.57489	1	12357	1	-0.58575
FAM104A	6	0.0013236	0.0052988	0.466874	243	5	-0.79529	0.45563	0.51343	1	11051	1	-0.79529
HMOX2	6	0.0013351	0.0053431	0.466874	244	3	-0.36844	0.68339	0.68481	1	14696	1	-0.36844
ERCC3	6	0.0013397	0.0053577	0.466874	245	3	-0.95352	0.914	0.914	1	19650	0	-0.95352
SLC12A9	6	0.001342	0.0053669	0.466874	246	3	-1.3822	0.95297	0.95295	1	20467	0	-1.3822
POLR3C	6	0.0013442	0.0053742	0.466874	247	4	-1.8133	0.28522	0.39582	1	8539	2	-1.8133
ELP3	6	0.0013466	0.0053819	0.466874	248	3	-1.3554	0.80577	0.80559	1	17287	0	-1.3554
PIK3C3	6	0.0013473	0.0053842	0.466874	249	4	-0.77533	0.62923	0.63784	1	13695	1	-0.77533
DROSHA	6	0.0013504	0.0053993	0.466874	250	5	-0.81905	0.99982	0.99982	1	21640	0	-0.81905
CENPA	6	0.0013646	0.0054592	0.466874	251	5	-0.57812	0.30183	0.414	1	8906	1	-0.57812
TMEM253	6	0.0013668	0.0054692	0.466874	252	4	-1.0561	0.65246	0.6574	1	14106	1	-1.0561
SRGAP2	6	0.0013716	0.0054852	0.466874	253	4	-0.63351	0.89121	0.89099	1	19163	0	-0.63351
CNOT2	6	0.0013757	0.0054999	0.466874	254	4	-0.98744	0.79029	0.79018	1	16939	0	-0.98744
CDC14A	4	0.001379	0.0055145	0.466874	255	4	-1.5938	0.99862	0.99862	1	21588	0	-1.5938
ATXN7L3	6	0.0013796	0.0055172	0.466874	256	4	-1.741	0.74879	0.74861	1	16057	0	-1.741
DDX27	6	0.001391	0.0055497	0.467285	257	2	-0.040819	0.71801	0.71789	1	15409	1	-0.040819
MGEA5	6	0.0013961	0.0055652	0.467285	258	4	-0.81727	0.50161	0.5433	1	11719	1	-0.81727
PGAP3	6	0.0014052	0.0055945	0.467927	259	2	0.12935	0.3392	0.44566	1	9547	1	0.12935
UPF1	6	0.0014161	0.005637	0.468021	260	5	-1.1143	0.97046	0.97032	1	20895	0	-1.1143
TPI1	6	0.0014171	0.0056388	0.468021	261	4	-0.92358	0.97781	0.97767	1	21055	0	-0.92358
hsa-mir-4420	4	0.0014436	0.0057307	0.473391	262	4	-0.70152	0.99856	0.99855	1	21585	0	-0.70152
PRMT1	6	0.0014487	0.0057512	0.473391	263	4	-0.90291	0.99771	0.99767	1	21561	0	-0.90291
IRS1	6	0.001453	0.0057691	0.473391	264	3	-0.4407	0.71655	0.71646	1	15374	1	-0.4407
CAND1	6	0.0014594	0.0057933	0.473585	265	4	-0.9221	0.2775	0.38748	1	8375	1	-0.9221
PIGQ	6	0.0014807	0.0058911	0.47977	266	2	-0.098201	0.2401	0.34666	0.999833	7503	1	-0.098201
TM9SF2	6	0.001499	0.0059651	0.480882	267	2	-0.31672	0.98848	0.98839	1	21325	0	-0.31672
IL17RA	6	0.0015088	0.0060058	0.480882	268	2	0.037031	0.036766	0.086141	0.96338	1919	2	0.037031
FNDC3B	6	0.0015095	0.0060076	0.480882	269	5	-1.6132	0.99904	0.99902	1	21603	0	-1.6132
C19orf57	6	0.0015123	0.0060182	0.480882	270	3	-0.65577	0.94964	0.94966	1	20398	0	-0.65577
TRA2B	6	0.0015233	0.0060607	0.480882	271	4	-1.0411	0.98673	0.98659	1	21271	0	-1.0411
ZNF213	6	0.001525	0.0060684	0.480882	272	5	-0.55812	0.44673	0.50789	1	10938	1	-0.55812
SULT1A2	6	0.0015309	0.0060885	0.480882	273	4	-0.66703	0.99647	0.99643	1	21526	0	-0.66703
TBC1D22A	6	0.0015309	0.0060885	0.480882	274	3	-0.21575	0.8636	0.86361	1	18549	0	-0.21575
CLDND2	6	0.0015349	0.0061045	0.480882	275	5	-0.84748	0.9897	0.98964	1	21355	0	-0.84748
EIF2S2	6	0.0015446	0.0061374	0.481723	276	5	-2.1359	0.33849	0.44529	1	9539	1	-2.1359
SIRT5	6	0.0015543	0.006179	0.483236	277	5	-0.66601	0.91931	0.91941	1	19775	0	-0.66601
RICTOR	6	0.0015942	0.0063331	0.492867	278	4	-0.94396	0.24576	0.35284	0.999909	7628	1	-0.94396
ATP6V0D1	6	0.0015978	0.0063477	0.492867	279	4	-1.0051	0.99239	0.99232	1	21424	0	-1.0051
COA4	6	0.0016159	0.006413	0.493592	280	5	-0.92166	0.99539	0.99537	1	21497	0	-0.92166
EIF6	6	0.001616	0.006413	0.493592	281	3	-3.3942	0.99121	0.99115	1	21388	0	-3.3942
MOCS3	6	0.0016188	0.0064254	0.493592	282	3	-0.49991	0.95081	0.95082	1	20419	0	-0.49991
PRDM8	6	0.0016267	0.0064587	0.494135	283	3	-0.56488	0.96235	0.96224	1	20702	0	-0.56488
SEC13	6	0.0016363	0.0064942	0.494135	284	4	-0.7221	0.97867	0.97852	1	21076	0	-0.7221
SPATA25	6	0.0016408	0.0065113	0.494135	285	3	-1.1262	0.98285	0.98268	1	21181	0	-1.1262
HDAC6	6	0.0016459	0.0065342	0.494135	286	5	-0.67538	0.52246	0.55745	1	12016	1	-0.67538
C9orf41	6	0.0016491	0.0065465	0.494135	287	4	-0.71367	0.21289	0.31724	0.99887	6880	1	-0.71367
CMAS	6	0.0016621	0.0065927	0.495373	288	5	-0.70376	0.99894	0.99892	1	21599	0	-0.70376
SPI1	6	0.0016723	0.0066269	0.495373	289	4	-1.0991	0.97089	0.97074	1	20905	0	-1.0991
hsa-mir-4261	4	0.0016749	0.0066375	0.495373	290	3	-0.78985	0.94716	0.94725	1	20341	0	-0.78985
DAP3	6	0.00168	0.0066544	0.495373	291	5	-0.95555	0.9905	0.99043	1	21372	0	-0.95555
RASA4	6	0.0017119	0.0067714	0.502357	292	4	-0.59336	0.86723	0.86723	1	18630	0	-0.59336
CCDC22	6	0.0017315	0.0068463	0.506184	293	3	-0.17268	0.34388	0.44821	1	9611	1	-0.17268
GOLGA6L1	6	0.0017425	0.0068907	0.507729	294	4	-0.5746	0.82151	0.82142	1	17631	0	-0.5746
SP1	6	0.0017621	0.0069693	0.508057	295	3	-0.56258	0.19273	0.29547	0.994216	6419	2	-0.56258
OXNAD1	6	0.001763	0.0069743	0.508057	296	4	-0.76028	0.91582	0.91586	1	19699	0	-0.76028
PLA2G10	6	0.0017662	0.0069862	0.508057	297	3	-0.40511	0.45614	0.51376	1	11061	1	-0.40511
SRC	6	0.0017671	0.0069889	0.508057	298	4	-1.1441	0.95789	0.95784	1	20586	0	-1.1441
HKDC1	6	0.0017994	0.0071201	0.513212	299	4	-0.95506	0.83138	0.83123	1	17836	0	-0.95506
DGCR8	6	0.0018067	0.0071452	0.513212	300	4	-2.3227	0.80007	0.7999	1	17166	0	-2.3227
FZD7	6	0.0018072	0.0071498	0.513212	301	5	-0.59277	0.99586	0.99586	1	21513	0	-0.59277
H2AFJ	6	0.0018118	0.0071697	0.513212	302	5	-1.0904	0.73257	0.73242	1	15712	0	-1.0904
DDX59	6	0.0018196	0.0072014	0.513212	303	5	-1.656	0.97672	0.97657	1	21025	0	-1.656
SPINT4	6	0.001822	0.0072165	0.513212	304	3	-0.79434	0.19445	0.29733	0.994216	6468	1	-0.79434
TIMM17B	6	0.0018249	0.0072257	0.513212	305	5	-0.67893	0.78527	0.78511	1	16838	0	-0.67893
PABPC1L	6	0.0018419	0.0072947	0.516287	306	4	-0.52925	0.98072	0.98055	1	21135	0	-0.52925
SEC61A1	6	0.0018485	0.0073166	0.516287	307	4	-1.519	0.99598	0.99598	1	21516	0	-1.519
DNLZ	6	0.0018708	0.0074025	0.520154	308	2	0.50977	0.025203	0.064366	0.953226	1457	3	0.50977
CHRNB2	6	0.0018748	0.0074195	0.520154	309	4	-0.71206	0.99594	0.99593	1	21514	0	-0.71206
PDE4C	6	0.0018845	0.007456	0.521032	310	3	-0.50416	0.23754	0.34386	0.999833	7444	2	-0.50416
LSM11	6	0.0019055	0.0075355	0.523535	311	3	-0.90561	0.76991	0.76975	1	16498	0	-0.90561
DNAJC5	6	0.0019074	0.0075424	0.523535	312	3	-0.43525	0.64305	0.6493	1	13941	1	-0.43525
HEATR1	6	0.0019146	0.0075643	0.523535	313	5	-0.82304	0.46804	0.52133	1	11229	1	-0.82304
GUCA1B	6	0.0019224	0.0075945	0.523948	314	5	-0.98155	0.99225	0.99218	1	21418	0	-0.98155
MIDN	6	0.0019315	0.0076311	0.524204	315	4	-0.9178	0.42215	0.49295	1	10618	1	-0.9178
MED30	6	0.0019354	0.0076466	0.524204	316	4	-0.8833	0.8853	0.88501	1	19032	0	-0.8833
CNOT3	6	0.0019664	0.0077641	0.528119	317	4	-1.4508	0.99734	0.99732	1	21547	0	-1.4508
LOC440243	2	0.0019695	0.0077782	0.528119	318	2	-3.5222	0.99803	0.99803	1	21566	0	-3.5222
RFPL1	6	0.0019726	0.0077883	0.528119	319	5	-0.90202	0.99957	0.99955	1	21627	0	-0.90202
MEIS1	6	0.0019784	0.0078084	0.528119	320	2	-0.071612	0.78674	0.78661	1	16875	0	-0.071612
GFER	6	0.0019894	0.0078486	0.528119	321	3	-1.0898	0.9715	0.97137	1	20917	0	-1.0898
SPATA5	6	0.0019896	0.00785	0.528119	322	5	-0.99651	0.99097	0.99089	1	21382	0	-0.99651
MAP2K6	6	0.0020034	0.0079058	0.530224	323	4	-0.71973	0.78211	0.78194	1	16765	0	-0.71973
SEMA4G	6	0.002059	0.0081352	0.543928	324	4	-0.65784	0.99634	0.99631	1	21524	0	-0.65784
ZNF492	6	0.0020745	0.0081905	0.544448	325	3	-0.97415	0.99525	0.99524	1	21493	0	-0.97415
EVPL	6	0.0020752	0.0081932	0.544448	326	4	-0.66788	0.87877	0.87861	1	18899	0	-0.66788
GOLGA6B	6	0.0021263	0.0083642	0.553357	327	4	-0.79524	0.18505	0.2871	0.993689	6256	1	-0.79524
TP53TG3	6	0.0021327	0.0083898	0.553357	328	3	-0.27884	0.99131	0.99125	1	21389	0	-0.27884
ZNF705A	6	0.0021362	0.0084039	0.553357	329	4	-0.66609	0.20996	0.31413	0.998581	6808	2	-0.66609
AMDHD2	6	0.0021455	0.0084373	0.553465	330	5	-0.51247	0.52251	0.55749	1	12017	1	-0.51247
RGS6	6	0.0021553	0.0084766	0.553465	331	3	-0.56826	0.59555	0.61088	1	13112	1	-0.56826
GOT1	6	0.0021564	0.008483	0.553465	332	4	-0.62591	0.57372	0.59425	1	12779	1	-0.62591
CIAO1	6	0.0021735	0.0085406	0.553465	333	5	-1.2902	0.7493	0.7491	1	16070	0	-1.2902
DNAJB2	6	0.0021772	0.0085525	0.553465	334	5	-0.45106	0.99558	0.99557	1	21503	0	-0.45106
STT3A	6	0.002179	0.0085589	0.553465	335	3	-0.4663	0.72375	0.72371	1	15527	0	-0.4663
SNRPG	6	0.0021907	0.0086119	0.555236	336	3	-0.71176	0.97748	0.97734	1	21047	0	-0.71176
GEMIN4	6	0.0022167	0.0087175	0.560375	337	4	-1.7774	0.98017	0.98	1	21120	0	-1.7774
GCG	6	0.0022303	0.0087627	0.561618	338	3	-0.49203	0.9923	0.99223	1	21421	0	-0.49203
FAM206A	6	0.0022375	0.0087929	0.561888	339	4	-0.82917	0.9776	0.97745	1	21051	0	-0.82917
BOLA2	6	0.0022479	0.0088244	0.562245	340	4	-0.46472	0.95408	0.95403	1	20499	0	-0.46472
PEX11B	6	0.0022584	0.0088628	0.563035	341	4	-0.81517	0.88451	0.88423	1	19020	0	-0.81517
MED14	6	0.0022944	0.0089862	0.569206	342	3	-0.99402	0.78958	0.78949	1	16923	0	-0.99402
YWHAE	6	0.0023124	0.0090644	0.570598	343	5	-0.86283	0.27016	0.37947	1	8201	1	-0.86283
S100A1	6	0.0023185	0.0090831	0.570598	344	2	-0.14384	0.31093	0.42398	1	9109	1	-0.14384
SGSM1	6	0.0023197	0.0090872	0.570598	345	5	-0.75502	0.66311	0.6667	1	14303	1	-0.75502
NSMCE1	6	0.0023339	0.0091402	0.572269	346	4	-0.73068	0.027136	0.067971	0.95738	1538	1	-0.73068
SPPL2A	6	0.0023523	0.0092125	0.575128	347	4	-0.87987	0.014949	0.043739	0.922609	1027	1	-0.87987
GRPEL2	6	0.0023695	0.0092842	0.576655	348	5	-0.68869	0.99889	0.99888	1	21598	0	-0.68869
NOP16	6	0.0023708	0.0092901	0.576655	349	4	-0.97102	0.1237	0.21874	0.992328	4752	2	-0.97102
MEF2BNB	6	0.0023776	0.0093171	0.576676	350	4	-1.2273	0.98816	0.98806	1	21312	0	-1.2273
FAM129A	6	0.002399	0.0093976	0.579998	351	3	-0.40083	0.86771	0.86774	1	18639	0	-0.40083
COG5	6	0.0024335	0.0095237	0.583697	352	2	-0.0087269	0.89441	0.89423	1	19235	0	-0.0087269
MARCKS	6	0.0024352	0.0095315	0.583697	353	4	-0.67455	0.6063	0.6193	1	13294	1	-0.67455
OR5A2	6	0.0024375	0.0095383	0.583697	354	4	-0.68273	0.48291	0.53091	1	11436	1	-0.68273
hsa-mir-5100	4	0.0024641	0.0096325	0.586406	355	2	-0.38981	0.11017	0.20355	0.990864	4445	1	-0.38981
TRIM73	6	0.0024686	0.0096512	0.586406	356	3	-0.58708	0.94995	0.94997	1	20403	0	-0.58708
SAFB	6	0.0024775	0.0096914	0.586406	357	5	-1.0609	0.13592	0.23247	0.992328	5044	1	-1.0609
GTF2F1	6	0.0024836	0.0097088	0.586406	358	1	0.25391	0.87733	0.87719	1	18869	0	0.25391
NDUFB10	6	0.0024872	0.0097179	0.586406	359	4	-1.1506	0.99418	0.99413	1	21469	0	-1.1506
GAPDH	6	0.0024967	0.009754	0.58695	360	3	-1.1222	0.99715	0.99712	1	21541	0	-1.1222
HCFC1	6	0.0025186	0.0098281	0.589767	361	3	-0.88557	0.29032	0.40138	1	8654	2	-0.88557
TCERG1	6	0.0025469	0.0099369	0.594647	362	2	0.33541	0.099497	0.19155	0.989814	4180	2	0.33541
TNFAIP6	6	0.0025555	0.0099734	0.595191	363	4	-0.71041	0.72476	0.72468	1	15551	0	-0.71041
hsa-mir-7113	4	0.0025925	0.010111	0.601716	364	2	-0.66939	0.93984	0.93986	1	20189	0	-0.66939
FAM83A	6	0.0026087	0.010161	0.603079	365	3	-0.50327	0.7682	0.76805	1	16463	0	-0.50327
PVRL4	6	0.0026288	0.010229	0.605462	366	5	-0.68853	0.99967	0.99966	1	21635	0	-0.68853
GTF3A	6	0.0026448	0.010293	0.607562	367	4	-0.83764	0.98239	0.9822	1	21172	0	-0.83764
CHTOP	6	0.0026551	0.010335	0.608088	368	4	-0.84106	0.34811	0.45053	1	9675	1	-0.84106
HIF1A	6	0.0026748	0.010414	0.608088	369	4	-0.66259	0.30029	0.41226	1	8873	2	-0.66259
GRM5	6	0.002678	0.010421	0.608088	370	3	-0.26766	0.82411	0.82399	1	17688	0	-0.26766
SUGP1	6	0.0026845	0.010436	0.608088	371	2	-0.33093	0.57738	0.597	1	12831	1	-0.33093
ELOVL7	6	0.0026899	0.010457	0.608088	372	5	-0.49895	0.99978	0.99979	1	21638	0	-0.49895
MTMR9	6	0.0026929	0.01047	0.608088	373	3	-0.51958	0.52541	0.55947	1	12056	1	-0.51958
BARD1	6	0.0027136	0.010553	0.611227	374	3	-0.99875	0.9974	0.99737	1	21549	0	-0.99875
KCNA4	6	0.0027209	0.010585	0.611472	375	4	-0.78853	0.78867	0.78862	1	16912	0	-0.78853
SBK2	6	0.0027471	0.01067	0.61477	376	4	-0.76948	0.72414	0.7241	1	15537	0	-0.76948
AAGAB	6	0.0028023	0.010868	0.623265	377	2	-0.14085	0.14702	0.24512	0.993117	5343	1	-0.14085
PPP1R2	6	0.0028036	0.010875	0.623265	378	4	-0.72275	0.17475	0.27603	0.993117	6003	1	-0.72275
AUTS2	6	0.0028151	0.01092	0.624167	379	5	-0.49682	0.89214	0.89196	1	19182	0	-0.49682
hsa-mir-153-2	3	0.0028411	0.011026	0.62857	380	3	-1.1161	0.99716	0.99713	1	21542	0	-1.1161
CCDC120	6	0.0028765	0.011159	0.634456	381	5	-0.69501	0.19252	0.29523	0.994216	6415	1	-0.69501
HOGA1	6	0.0028955	0.011219	0.635791	382	4	-0.91815	0.79874	0.79855	1	17133	0	-0.91815
OR10H4	6	0.002909	0.011261	0.635791	383	2	-0.17745	0.91925	0.91934	1	19774	0	-0.17745
TMPRSS7	6	0.0029118	0.01127	0.635791	384	4	-0.56965	0.8637	0.86371	1	18551	0	-0.56965
SRP19	6	0.0029665	0.011428	0.641346	385	3	-0.21827	0.78987	0.78977	1	16930	0	-0.21827
HAAO	6	0.0029931	0.011499	0.641346	386	4	-0.84874	0.53361	0.56524	1	12162	1	-0.84874
WNT3	6	0.0029983	0.01151	0.641346	387	3	-0.37961	0.96938	0.96928	1	20865	0	-0.37961
DNAJB6	6	0.0030245	0.011588	0.641346	388	4	-0.83896	0.99289	0.99283	1	21439	0	-0.83896
BRINP3	6	0.0030344	0.011618	0.641346	389	4	-0.61687	0.93158	0.93165	1	20022	0	-0.61687
AHCTF1	6	0.0030349	0.01162	0.641346	390	3	-1.4723	0.50136	0.54315	1	11716	1	-1.4723
C20orf144	6	0.0030382	0.011632	0.641346	391	4	-0.66297	0.97698	0.97683	1	21035	0	-0.66297
PANX2	6	0.0030474	0.011654	0.641346	392	4	-0.6328	0.82575	0.82562	1	17726	0	-0.6328
TRIM56	6	0.0030555	0.01168	0.641346	393	4	-0.73624	0.98167	0.98149	1	21157	0	-0.73624
SEPHS1	6	0.0030596	0.011692	0.641346	394	4	-0.62071	0.99946	0.99944	1	21620	0	-0.62071
LOC100288332	4	0.0030602	0.011694	0.641346	395	1	-0.17747	0.94691	0.94699	1	20335	0	-0.17747
BECN1	6	0.0030849	0.011766	0.643677	396	4	-0.65837	0.97118	0.97104	1	20910	0	-0.65837
RND3	6	0.0031059	0.011828	0.64395	397	4	-0.77089	0.80754	0.8074	1	17323	0	-0.77089
PJA1	6	0.0031074	0.011831	0.64395	398	2	-0.34935	0.86875	0.86875	1	18658	0	-0.34935
GTF2E1	6	0.0031283	0.011893	0.645334	399	3	0.048042	0.70893	0.70895	1	15217	1	0.048042
ATP5A1	6	0.003135	0.011916	0.645334	400	4	-0.79045	0.38142	0.46911	1	10082	1	-0.79045
APC	6	0.0031851	0.012056	0.649439	401	4	-1.4159	0.99918	0.99916	1	21611	0	-1.4159
C13orf45	6	0.0031985	0.012095	0.649439	402	4	-0.86671	0.96888	0.96879	1	20854	0	-0.86671
ORC5	6	0.003209	0.012121	0.649439	403	3	-0.49675	0.9351	0.9352	1	20092	0	-0.49675
PODNL1	6	0.0032175	0.012145	0.649439	404	4	-0.47954	0.16516	0.26577	0.993117	5771	1	-0.47954
NonTargetingControlGuideForHuman_0361	1	0.0032186	0.012149	0.649439	405	1	-0.87046	0.99678	0.99673	1	21535	0	-0.87046
SLC30A1	6	0.0032295	0.012184	0.649439	406	4	-0.84298	0.99645	0.99641	1	21525	0	-0.84298
LSM7	6	0.0032352	0.012202	0.649439	407	3	-0.86894	0.57574	0.59576	1	12809	1	-0.86894
hsa-mir-1302-8	4	0.0032539	0.012253	0.650217	408	2	-0.69149	0.07501	0.1557	0.979789	3435	2	-0.69149
TBX6	6	0.003272	0.0123	0.650217	409	4	-0.55372	0.98024	0.98008	1	21123	0	-0.55372
MEX3C	6	0.0032736	0.012306	0.650217	410	4	-0.66222	0.92715	0.92726	1	19925	0	-0.66222
GJA5	6	0.0033059	0.012395	0.653333	411	4	-0.58723	0.53685	0.5675	1	12203	1	-0.58723
TMEM151A	6	0.0033583	0.012553	0.660038	412	3	-0.54842	0.21774	0.32243	0.999387	6981	1	-0.54842
EFNA1	6	0.0033863	0.012634	0.662707	413	3	-0.67125	0.85853	0.85849	1	18455	0	-0.67125
NINJ1	6	0.0034095	0.012697	0.664359	414	3	-0.50487	0.9307	0.93076	1	20003	0	-0.50487
LAMTOR5	6	0.0034276	0.012748	0.66543	415	4	-0.93491	0.92203	0.9221	1	19829	0	-0.93491
TMEM258	6	0.0034542	0.012823	0.666102	416	3	-0.68918	0.94084	0.94091	1	20214	0	-0.68918
ZNF687	6	0.0034568	0.012829	0.666102	417	2	-0.19974	0.32575	0.43837	1	9385	1	-0.19974
PMPCA	6	0.0034644	0.012853	0.666102	418	4	-0.90036	0.25865	0.36692	0.999919	7946	1	-0.90036
C16orf72	6	0.0035266	0.013047	0.674434	419	2	-0.017297	0.088301	0.17871	0.987867	3915	1	-0.017297
CFC1	6	0.0035357	0.013076	0.674434	420	2	0.48156	0.14936	0.2478	0.993117	5401	2	0.48156
PTGER1	6	0.0035748	0.013188	0.676735	421	3	-0.32188	0.78249	0.78233	1	16780	0	-0.32188
FBLN7	6	0.0035858	0.013219	0.676735	422	1	-0.16251	0.33094	0.44119	1	9443	1	-0.16251
OR4D2	6	0.0035859	0.013219	0.676735	423	4	-0.79886	0.24749	0.35468	0.999909	7673	2	-0.79886
UNC13A	6	0.0035928	0.013245	0.676735	424	4	-0.51453	0.92023	0.92034	1	19789	0	-0.51453
ENAH	6	0.0036202	0.013314	0.67866	425	3	-0.61479	0.74889	0.74871	1	16062	0	-0.61479
RPS6	6	0.0036386	0.013367	0.67974	426	4	-0.63103	0.71121	0.71118	1	15253	1	-0.63103
ABCA6	6	0.0036532	0.013414	0.680513	427	2	-0.49028	0.76207	0.7619	1	16327	0	-0.49028
GEMIN8	6	0.0036895	0.013503	0.681208	428	3	-0.56306	0.95724	0.95717	1	20573	0	-0.56306
MYO15A	6	0.0036984	0.013527	0.681208	429	3	-0.55452	0.049066	0.10899	0.967059	2437	1	-0.55452
IL12RB1	6	0.0036999	0.013533	0.681208	430	4	-0.64233	0.95841	0.95834	1	20603	0	-0.64233
SYN2	6	0.0037237	0.013609	0.681208	431	3	-0.60331	0.36208	0.45819	1	9837	1	-0.60331
SLC25A44	6	0.0037282	0.013617	0.681208	432	4	-0.71672	0.94379	0.94388	1	20271	0	-0.71672
ANKRD49	6	0.0037477	0.013675	0.681208	433	2	0.17989	0.29281	0.40409	1	8711	2	0.17989
C1orf116	6	0.0037731	0.013749	0.681208	434	3	0.011215	0.29426	0.40567	1	8738	2	0.011215
NOMO1	6	0.0037851	0.013778	0.681208	435	3	-0.3381	0.88574	0.88543	1	19043	0	-0.3381
SSR4	6	0.0037867	0.013783	0.681208	436	4	-0.84655	0.61813	0.62874	1	13511	1	-0.84655
NELFCD	6	0.0038048	0.013847	0.681208	437	3	-0.94722	0.17252	0.27359	0.993117	5944	1	-0.94722
SPOCD1	6	0.0038049	0.013847	0.681208	438	2	0.040849	0.49374	0.538	1	11593	1	0.040849
hsa-mir-548k	4	0.003808	0.013858	0.681208	439	3	-0.70211	0.37137	0.46337	1	9965	1	-0.70211
PES1	6	0.0038344	0.013939	0.681208	440	4	-0.92736	0.99229	0.99222	1	21420	0	-0.92736
PGP	6	0.0038361	0.013942	0.681208	441	3	-0.52498	0.23862	0.34503	0.999833	7471	1	-0.52498
HABP2	6	0.0038394	0.013957	0.681208	442	2	-0.094152	0.11144	0.205	0.990864	4479	1	-0.094152
C2orf54	6	0.0038503	0.013984	0.681208	443	4	-0.85858	0.95879	0.95873	1	20610	0	-0.85858
CCNH	6	0.0038525	0.013989	0.681208	444	4	-0.81326	0.050334	0.11131	0.968288	2488	2	-0.81326
RBBP8NL	6	0.0038586	0.014009	0.681208	445	3	-0.073123	0.001882	0.0070936	0.87035	171	1	-0.073123
CRCP	6	0.0038679	0.014038	0.681208	446	4	-2.1717	0.99867	0.99867	1	21589	0	-2.1717
RPL18	6	0.0038778	0.014056	0.681208	447	4	-1.3707	0.97812	0.97798	1	21063	0	-1.3707
hsa-mir-1258	4	0.0038982	0.014121	0.681731	448	3	-0.58335	0.94038	0.94042	1	20203	0	-0.58335
STOX2	6	0.0039205	0.014198	0.681731	449	2	0.34857	0.1433	0.24087	0.992328	5257	2	0.34857
VSTM2L	6	0.00394	0.014254	0.681731	450	3	-0.53182	0.88676	0.88651	1	19068	0	-0.53182
CYP4F3	6	0.0039501	0.014282	0.681731	451	4	-0.62317	0.99577	0.99578	1	21511	0	-0.62317
ALG5	6	0.0039567	0.0143	0.681731	452	4	-1.8765	0.99406	0.99402	1	21467	0	-1.8765
CCT3	6	0.0039673	0.014329	0.681731	453	3	-1.1181	0.85075	0.85073	1	18263	0	-1.1181
ZNF366	6	0.0039733	0.014345	0.681731	454	4	-0.73804	0.86014	0.86009	1	18484	0	-0.73804
MNT	6	0.0039751	0.014346	0.681731	455	4	-0.54753	0.42072	0.49211	1	10596	1	-0.54753
MYL7	6	0.0039863	0.01438	0.681731	456	2	-0.056786	0.42044	0.49195	1	10592	1	-0.056786
MTX2	6	0.0039947	0.014407	0.681731	457	4	-0.53793	0.36312	0.45877	1	9851	1	-0.53793
NonTargetingControlGuideForHuman_0842	1	0.0039971	0.014413	0.681731	458	1	-0.86655	0.996	0.99599	1	21517	0	-0.86655
C11orf30	6	0.0040516	0.014574	0.683306	459	4	-0.64516	0.099037	0.19102	0.989814	4171	1	-0.64516
SLC39A9	6	0.0040563	0.014586	0.683306	460	4	-0.94271	0.67482	0.67705	1	14526	1	-0.94271
hsa-mir-3180-1	4	0.0040621	0.014601	0.683306	461	2	-0.83075	0.92969	0.92977	1	19982	0	-0.83075
USP17L11	6	0.0040655	0.014617	0.683306	462	4	-0.26207	0.99841	0.9984	1	21576	0	-0.26207
TAF9	6	0.0040723	0.014636	0.683306	463	4	-0.88714	0.84295	0.84282	1	18087	0	-0.88714
HSPE1-MOB4	5	0.0040834	0.014673	0.683306	464	4	-0.82259	0.92925	0.92932	1	19971	0	-0.82259
KRTCAP2	6	0.0040864	0.014684	0.683306	465	2	0.20523	0.088465	0.17889	0.987867	3919	2	0.20523
PIGH	6	0.0040932	0.014708	0.683306	466	2	-0.36013	0.748	0.74779	1	16040	0	-0.36013
ENO1	6	0.0041016	0.01473	0.683306	467	4	-1.1941	0.9919	0.99183	1	21404	0	-1.1941
PON2	6	0.0041403	0.014847	0.687262	468	4	-1.3123	0.3736	0.46464	1	9993	1	-1.3123
CMPK1	6	0.0041568	0.014896	0.688055	469	2	0.093549	0.17316	0.27429	0.993117	5960	1	0.093549
CLDN6	6	0.0041865	0.014989	0.688435	470	1	0.35883	0.4898	0.53539	1	11537	1	0.35883
FUBP3	6	0.0041888	0.014994	0.688435	471	4	-0.87326	0.75039	0.7502	1	16096	0	-0.87326
SRL	6	0.004233	0.015118	0.688435	472	3	-0.31812	0.97973	0.97956	1	21106	0	-0.31812
hsa-mir-449b	4	0.0042343	0.015121	0.688435	473	3	-1.3463	0.94217	0.94224	1	20240	0	-1.3463
DPP3	6	0.0042474	0.015164	0.688435	474	4	-0.74308	0.98694	0.9868	1	21280	0	-0.74308
POLR1E	6	0.0042491	0.015167	0.688435	475	4	-0.57306	0.95718	0.95711	1	20569	0	-0.57306
SEMA6A	6	0.0042529	0.015181	0.688435	476	3	-0.42209	0.077727	0.16046	0.981349	3539	2	-0.42209
PPAN	6	0.0042653	0.015215	0.688435	477	3	-0.27769	0.96452	0.96443	1	20751	0	-0.27769
TDRD10	6	0.0042985	0.015311	0.688435	478	3	-0.6257	0.98743	0.98731	1	21289	0	-0.6257
CRYZL1	6	0.0043001	0.015316	0.688435	479	3	-0.40194	0.38885	0.47336	1	10175	1	-0.40194
ZC3H13	6	0.0043216	0.015375	0.688435	480	4	-1.0816	0.43423	0.50019	1	10764	1	-1.0816
hsa-mir-6759	4	0.0043237	0.01538	0.688435	481	3	-0.84509	0.935	0.93509	1	20089	0	-0.84509
MED10	6	0.0043261	0.015388	0.688435	482	2	-0.41419	0.92013	0.92023	1	19785	0	-0.41419
DTNB	6	0.0043285	0.015394	0.688435	483	4	-0.87228	0.87776	0.8776	1	18877	0	-0.87228
RNMT	6	0.0043367	0.015418	0.688435	484	4	-0.59325	0.49226	0.53703	1	11573	1	-0.59325
PPP4C	6	0.0043465	0.015443	0.688435	485	3	-0.93739	0.983	0.98284	1	21183	0	-0.93739
CYB561	6	0.0043476	0.015445	0.688435	486	3	-0.33168	0.16559	0.26625	0.993117	5780	1	-0.33168
BAG4	6	0.0043608	0.015481	0.688627	487	3	-0.35387	0.36011	0.45709	1	9810	1	-0.35387
HNRNPA2B1	6	0.0043867	0.015555	0.690447	488	3	-0.77955	0.26232	0.37093	1	8026	2	-0.77955
ORAOV1	6	0.0043988	0.015586	0.690447	489	4	-1.8485	0.44624	0.50761	1	10930	1	-1.8485
RNF40	6	0.0044614	0.015761	0.696797	490	3	-0.66196	0.61739	0.62812	1	13497	1	-0.66196
IGSF1	6	0.0045194	0.015919	0.700266	491	2	0.73954	0.011425	0.034547	0.915126	795	4	0.73954
CTU2	6	0.0045316	0.015955	0.700266	492	4	-0.95482	0.26648	0.37545	1	8127	1	-0.95482
CD1A	6	0.0045319	0.015956	0.700266	493	3	-0.38994	0.98049	0.98032	1	21130	0	-0.38994
ZCCHC18	6	0.0045394	0.015979	0.700266	494	3	-0.042479	0.043293	0.098407	0.96338	2203	3	-0.042479
DDX3X	6	0.004558	0.016031	0.700266	495	3	-0.67576	0.85658	0.85653	1	18416	0	-0.67576
COPB2	6	0.0045786	0.016097	0.700266	496	4	-1.0276	0.034866	0.0826	0.96338	1848	2	-1.0276
SOD2	6	0.0045835	0.016113	0.700266	497	4	-1.2916	0.33044	0.44094	1	9437	1	-1.2916
ZAR1	6	0.0045861	0.016119	0.700266	498	2	-0.92785	0.99856	0.99855	1	21584	0	-0.92785
UBA1	6	0.0046005	0.016162	0.700266	499	3	-0.90572	0.99761	0.99757	1	21557	0	-0.90572
FAM101A	6	0.0046094	0.016184	0.700266	500	4	-0.59764	0.65304	0.65792	1	14115	1	-0.59764
PLAC4	6	0.0046193	0.016209	0.700266	501	3	-0.48135	0.46881	0.52182	1	11239	1	-0.48135
SKA1	6	0.0046269	0.016232	0.700266	502	4	-0.62991	0.21317	0.31754	0.999112	6885	2	-0.62991
GTF2H3	6	0.0046398	0.016267	0.700266	503	3	-0.83203	0.45587	0.5136	1	11056	1	-0.83203
IFT140	6	0.0046575	0.016314	0.700266	504	2	-0.12415	0.48813	0.53434	1	11514	1	-0.12415
UFC1	6	0.0046638	0.016328	0.700266	505	3	0.06747	0.14728	0.24544	0.993117	5348	2	0.06747
DHDDS	6	0.0046759	0.016362	0.700266	506	3	-0.59793	0.48951	0.53521	1	11530	1	-0.59793
HNF1A	6	0.0046869	0.016389	0.700266	507	3	-0.32349	0.30153	0.41364	1	8901	1	-0.32349
RHOV	6	0.0047152	0.016467	0.7022	508	4	-0.89505	0.99293	0.99287	1	21440	0	-0.89505
ATAD3A	6	0.0047312	0.016508	0.702301	509	4	-1.0493	0.49516	0.53896	1	11623	1	-1.0493
CCDC116	6	0.0047422	0.016534	0.702301	510	3	-0.39654	0.9557	0.95565	1	20529	0	-0.39654
LIN28B	6	0.004787	0.016669	0.705628	511	4	-0.63724	0.6471	0.65282	1	14016	1	-0.63724
CENPL	6	0.0048044	0.016715	0.705628	512	3	-0.70648	0.97351	0.9734	1	20955	0	-0.70648
SLC35A1	6	0.0048061	0.016719	0.705628	513	3	-0.44005	0.8156	0.81549	1	17503	0	-0.44005
CCNK	6	0.0048233	0.016768	0.705628	514	3	-0.49617	0.074067	0.15404	0.979789	3397	2	-0.49617
hsa-mir-302f	3	0.0048264	0.016778	0.705628	515	1	-0.044961	0.41719	0.49003	1	10557	1	-0.044961
UIMC1	6	0.0048366	0.016808	0.705628	516	4	-0.769	0.33367	0.44267	1	9477	1	-0.769
MIB1	6	0.0048601	0.01688	0.706592	517	4	-0.84548	0.2879	0.39877	1	8591	1	-0.84548
HIRA	6	0.0048654	0.016896	0.706592	518	4	-0.70953	0.99959	0.99958	1	21630	0	-0.70953
ATP11C	6	0.004887	0.01696	0.707619	519	3	-0.30237	0.88611	0.88581	1	19054	0	-0.30237
DICER1	6	0.0049093	0.017021	0.707619	520	3	-0.51106	0.98259	0.98241	1	21176	0	-0.51106
LCE4A	6	0.0049213	0.017059	0.707619	521	4	-0.50607	0.22447	0.32969	0.999387	7133	1	-0.50607
GATAD2A	6	0.0049353	0.017104	0.707619	522	2	0.57232	0.17649	0.2779	0.993117	6040	2	0.57232
TCIRG1	6	0.0049396	0.017117	0.707619	523	4	-0.60495	0.97242	0.97231	1	20934	0	-0.60495
PDIA2	6	0.0049422	0.017122	0.707619	524	3	-0.80413	0.69305	0.69379	1	14910	1	-0.80413
SLC25A17	6	0.0049529	0.017149	0.707619	525	3	-0.47055	0.94638	0.94648	1	20317	0	-0.47055
MAPK7	6	0.0049874	0.017241	0.708879	526	3	-0.55618	0.23143	0.33733	0.999833	7302	2	-0.55618
POLR2C	6	0.0049887	0.017245	0.708879	527	4	-0.81317	0.99387	0.99383	1	21465	0	-0.81317
EIF2B2	6	0.0050229	0.017342	0.710321	528	4	-0.89506	0.96527	0.96518	1	20764	0	-0.89506
WDR92	6	0.0050337	0.017374	0.710321	529	3	-0.1844	0.65404	0.65879	1	14130	1	-0.1844
LGMN	6	0.0050354	0.017378	0.710321	530	2	0.0056797	0.46	0.51619	1	11119	1	0.0056797
EXTL3	6	0.0050554	0.017427	0.71096	531	3	-0.42713	0.97926	0.97908	1	21094	0	-0.42713
SDAD1	6	0.0051012	0.017551	0.713993	532	3	-0.73686	0.96276	0.96264	1	20710	0	-0.73686
GREB1L	6	0.00511	0.017577	0.713993	533	4	-0.89281	0.97673	0.97658	1	21027	0	-0.89281
SAP130	6	0.0051171	0.0176	0.713993	534	4	-0.68024	0.6316	0.63978	1	13735	1	-0.68024
GNB1L	6	0.0051541	0.017707	0.716989	535	4	-0.54848	0.83675	0.83663	1	17953	0	-0.54848
RBM25	6	0.0051805	0.017796	0.718412	536	4	-0.93528	0.73042	0.73026	1	15676	0	-0.93528
RANGAP1	6	0.0051871	0.017809	0.718412	537	1	0.40613	0.55943	0.58367	1	12545	1	0.40613
PIK3R6	6	0.0052697	0.018042	0.723854	538	3	-0.57102	0.98654	0.98641	1	21266	0	-0.57102
GNAL	6	0.0052698	0.018042	0.723854	539	3	-1.7441	0.44692	0.508	1	10941	1	-1.7441
SNX9	6	0.0052705	0.018044	0.723854	540	4	-0.45382	0.68208	0.68357	1	14676	1	-0.45382
WISP2	6	0.0052966	0.018113	0.724279	541	3	-0.58086	0.98433	0.98421	1	21214	0	-0.58086
TRIM3	6	0.0052995	0.018121	0.724279	542	3	-0.44027	0.77779	0.77765	1	16668	0	-0.44027
PIM2	6	0.0053369	0.018231	0.725089	543	4	-0.79108	0.84006	0.83997	1	18025	0	-0.79108
HLA-DOB	6	0.0053371	0.018231	0.725089	544	1	0.053179	0.23021	0.33596	0.999645	7277	2	0.053179
ROGDI	6	0.0053415	0.018242	0.725089	545	3	-0.29181	0.37584	0.4659	1	10015	1	-0.29181
FERMT2	6	0.0053595	0.018295	0.725437	546	3	-0.77425	0.7547	0.75454	1	16181	0	-0.77425
SF3A2	6	0.0053743	0.018341	0.725437	547	4	-0.44039	0.56133	0.58504	1	12572	1	-0.44039
FGB	6	0.0053775	0.018351	0.725437	548	3	-0.91263	0.95578	0.95573	1	20531	0	-0.91263
DCTN5	6	0.0053927	0.018404	0.726208	549	4	-0.84376	0.6488	0.65427	1	14046	1	-0.84376
SNX15	6	0.005412	0.018453	0.726339	550	3	-0.46678	0.32016	0.43431	1	9308	1	-0.46678
NIP7	6	0.0054182	0.018474	0.726339	551	2	-1.8708	0.96469	0.96462	1	20755	0	-1.8708
PPP1R10	6	0.0054371	0.018529	0.726583	552	3	-0.63492	0.83435	0.83428	1	17902	0	-0.63492
CCDC130	6	0.0054458	0.018555	0.726583	553	4	-0.76437	0.88093	0.88071	1	18946	0	-0.76437
FAM19A5	6	0.0054726	0.018628	0.726583	554	3	-0.80866	0.93517	0.93527	1	20096	0	-0.80866
SDR16C5	6	0.0054745	0.018634	0.726583	555	3	-0.27271	0.77282	0.77267	1	16551	0	-0.27271
2018-09-02	6	0.0054802	0.018648	0.726583	556	3	-0.76158	0.76724	0.76712	1	16440	0	-0.76158
PDZK1	6	0.0054955	0.018694	0.727065	557	3	-0.13169	0.14548	0.24339	0.993117	5305	2	-0.13169
GTF2H5	6	0.0055184	0.018757	0.727309	558	3	-0.41056	0.24051	0.34711	0.999833	7512	2	-0.41056
CBR1	6	0.0055356	0.018813	0.727309	559	4	-0.48548	0.95631	0.95627	1	20547	0	-0.48548
BRAT1	6	0.0055375	0.018818	0.727309	560	3	-0.53733	0.23842	0.34482	0.999833	7462	1	-0.53733
TMEM176A	6	0.0055452	0.018843	0.727309	561	3	-1.0394	0.95391	0.95386	1	20495	0	-1.0394
hsa-mir-3118-1	1	0.0055541	0.018868	0.727309	562	1	-1.6864	0.99445	0.9944	1	21476	0	-1.6864
MED8	6	0.0056106	0.019027	0.730623	563	3	-0.90767	0.22568	0.331	0.999387	7168	1	-0.90767
HPRT1	6	0.0056191	0.019051	0.730623	564	2	0.27674	0.56085	0.58469	1	12566	1	0.27674
RUVBL1	6	0.0056217	0.019056	0.730623	565	4	-0.65537	0.13725	0.23396	0.992328	5090	2	-0.65537
TTC27	6	0.0056371	0.019102	0.731075	566	2	-0.013376	0.77505	0.77486	1	16607	0	-0.013376
TRABD2B	6	0.0056502	0.019135	0.731075	567	4	-0.82749	0.024532	0.063055	0.951422	1435	2	-0.82749
hsa-mir-3689a	4	0.0056789	0.019221	0.733083	568	3	-0.52957	0.9927	0.99264	1	21434	0	-0.52957
LEO1	6	0.0057174	0.019346	0.733493	569	3	-0.79071	0.99543	0.99541	1	21498	0	-0.79071
LGALS9B	6	0.0057363	0.019401	0.733493	570	4	-0.59465	0.67718	0.67916	1	14573	1	-0.59465
MOGS	6	0.0057371	0.019405	0.733493	571	4	-0.80973	0.88128	0.88106	1	18950	0	-0.80973
ATRN	6	0.0057395	0.019411	0.733493	572	3	-0.33252	0.91554	0.91558	1	19684	0	-0.33252
EIF3H	6	0.0057423	0.019417	0.733493	573	4	-0.97341	0.75477	0.75461	1	16182	0	-0.97341
FOXN1	6	0.0057487	0.019435	0.733493	574	3	-0.48296	0.83294	0.8328	1	17869	0	-0.48296
CPSF3	6	0.0057821	0.019515	0.734504	575	4	-0.72743	0.19738	0.30051	0.994216	6538	1	-0.72743
PTPN18	6	0.0057871	0.01953	0.734504	576	2	-0.80991	0.95567	0.95562	1	20528	0	-0.80991
KLK5	6	0.0058188	0.019622	0.736697	577	2	-0.13717	0.24991	0.3573	0.999909	7723	2	-0.13717
AUP1	6	0.0058374	0.019673	0.736745	578	3	-0.81572	0.5705	0.59187	1	12731	1	-0.81572
hsa-mir-1304	4	0.0058462	0.019703	0.736745	579	3	-1.1841	0.85551	0.85549	1	18380	0	-1.1841
TKT	6	0.0058532	0.019725	0.736745	580	3	-0.53005	0.36508	0.45987	1	9872	1	-0.53005
NonTargetingControlGuideForHuman_0086	1	0.0058638	0.01976	0.736772	581	1	-0.7968	0.99414	0.99409	1	21468	0	-0.7968
MGST1	6	0.0058954	0.019856	0.73887	582	4	-0.8517	0.5636	0.58671	1	12618	1	-0.8517
MGAT2	6	0.0059101	0.019894	0.73887	583	4	-0.7229	0.93521	0.93531	1	20100	0	-0.7229
NANOS3	6	0.0059189	0.019919	0.73887	584	4	-0.78455	0.96275	0.96263	1	20709	0	-0.78455
KANK4	6	0.0059433	0.019984	0.740027	585	4	-0.80109	0.76029	0.76008	1	16289	0	-0.80109
TRAF7	6	0.0059589	0.020022	0.74015	586	3	-0.54609	0.78111	0.78094	1	16747	0	-0.54609
GTF2IRD1	6	0.005987	0.0201	0.741657	587	2	0.21523	0.29712	0.40875	1	8803	1	0.21523
UAP1L1	6	0.0059981	0.020131	0.741657	588	2	-0.14821	0.35845	0.45618	1	9798	1	-0.14821
HHLA2	6	0.0060369	0.020241	0.744449	589	1	0.13164	0.77763	0.77749	1	16665	0	0.13164
TMCC1	6	0.006103	0.020426	0.749305	590	2	-0.12153	0.71636	0.71627	1	15369	1	-0.12153
CCT8	6	0.0061308	0.020505	0.749305	591	4	-0.73311	0.87642	0.87628	1	18842	0	-0.73311
EDEM2	6	0.0061369	0.020523	0.749305	592	3	-0.55294	0.11244	0.20609	0.991363	4501	1	-0.55294
C21orf59	6	0.0061369	0.020523	0.749305	593	3	-0.67618	0.56041	0.58436	1	12559	1	-0.67618
CDO1	6	0.0061751	0.020624	0.749305	594	3	-0.18029	0.095485	0.18694	0.988234	4092	2	-0.18029
VPS54	6	0.0061861	0.020651	0.749305	595	4	-0.72814	0.11614	0.21026	0.992328	4581	2	-0.72814
SRP14	6	0.0061869	0.020652	0.749305	596	4	-0.72414	0.72734	0.72719	1	15612	0	-0.72414
ZNF486	6	0.0061902	0.020659	0.749305	597	4	-0.61663	0.90449	0.9044	1	19465	0	-0.61663
ZNF534	6	0.0061992	0.020684	0.749305	598	3	-0.34735	0.75172	0.75152	1	16121	0	-0.34735
POLR3A	6	0.0062416	0.02081	0.751363	599	3	-0.70305	0.68031	0.682	1	14635	1	-0.70305
MPI	6	0.0062523	0.020842	0.751363	600	2	-0.14737	0.77224	0.77211	1	16540	0	-0.14737
ERI2	6	0.006254	0.020845	0.751363	601	3	-0.53039	0.12006	0.21465	0.992328	4661	1	-0.53039
HTRA2	6	0.006296	0.020959	0.753042	602	2	-0.091493	0.39944	0.47953	1	10317	1	-0.091493
WASH1	6	0.0062975	0.020961	0.753042	603	3	-0.81075	0.9856	0.98548	1	21246	0	-0.81075
RPN2	6	0.0063308	0.021066	0.754236	604	4	-0.87494	0.72411	0.72407	1	15535	0	-0.87494
RABAC1	6	0.0063398	0.021086	0.754236	605	2	-0.06793	0.4812	0.52978	1	11413	1	-0.06793
BTBD10	6	0.00635	0.021118	0.754236	606	4	-0.57916	0.98426	0.98414	1	21210	0	-0.57916
SNX1	6	0.0063655	0.021159	0.754236	607	4	-1.6561	0.97175	0.97162	1	20921	0	-1.6561
MAP2K5	6	0.006381	0.021204	0.754236	608	4	-0.56009	0.79165	0.79151	1	16965	0	-0.56009
STK11	6	0.0063867	0.021218	0.754236	609	1	-0.039702	0.64213	0.64852	1	13926	1	-0.039702
RPL34	6	0.0063936	0.021238	0.754236	610	3	-1.6051	0.90338	0.90323	1	19432	0	-1.6051
PPIL2	6	0.006423	0.021325	0.754991	611	3	-0.50725	0.97786	0.97772	1	21056	0	-0.50725
RPS6KA3	6	0.0064253	0.021329	0.754991	612	4	-0.771	0.99007	0.99	1	21364	0	-0.771
EBLN2	6	0.0064487	0.021395	0.756101	613	4	-0.6175	0.62592	0.63508	1	13642	1	-0.6175
CDH6	6	0.0064866	0.021506	0.758772	614	2	-0.44462	0.9044	0.9043	1	19463	0	-0.44462
KLHL18	6	0.0065143	0.021581	0.760163	615	4	-1.0447	0.67118	0.67377	1	14450	1	-1.0447
ARID3A	6	0.0065865	0.021784	0.764936	616	2	-0.37772	0.97413	0.97403	1	20971	0	-0.37772
WDR83	6	0.006588	0.021787	0.764936	617	3	-0.52996	0.91287	0.91286	1	19623	0	-0.52996
CCDC71	6	0.0066365	0.021921	0.76704	618	1	0.31592	0.060853	0.13052	0.976213	2887	2	0.31592
BOD1L1	6	0.0066505	0.021954	0.76704	619	2	-0.15191	0.011671	0.035208	0.915126	813	1	-0.15191
CHST12	6	0.0066555	0.021966	0.76704	620	2	-0.38337	0.83514	0.83507	1	17916	0	-0.38337
hsa-mir-6886	4	0.0066633	0.021988	0.76704	621	3	-0.93359	0.92763	0.92774	1	19943	0	-0.93359
C2orf70	6	0.0066897	0.022058	0.768226	622	4	-0.61455	0.075485	0.15653	0.979789	3458	1	-0.61455
hsa-mir-6871	4	0.0067242	0.022156	0.77041	623	2	-0.38642	0.61899	0.62945	1	13535	0	-0.38642
KCTD5	6	0.0067543	0.022237	0.771889	624	4	-0.58566	0.99959	0.99957	1	21629	0	-0.58566
TRIM49	6	0.0067688	0.02227	0.771889	625	3	-0.35465	0.63729	0.64443	1	13837	1	-0.35465
FCRLB	6	0.0067935	0.022332	0.772823	626	4	-0.61167	0.98089	0.98072	1	21137	0	-0.61167
NGRN	6	0.0068473	0.0225	0.777386	627	3	-0.38986	0.077741	0.16049	0.981349	3540	2	-0.38986
HEXA	6	0.0068862	0.022627	0.779452	628	1	0.33612	0.13151	0.22756	0.992328	4935	2	0.33612
PROB1	6	0.0068977	0.022659	0.779452	629	3	-0.29481	0.54415	0.57264	1	12306	1	-0.29481
ASPM	6	0.0069013	0.022668	0.779452	630	4	-0.66246	0.64222	0.64858	1	13929	1	-0.66246
ERCC2	6	0.0069351	0.02277	0.781387	631	3	-0.88669	0.67815	0.68003	1	14591	1	-0.88669
SYNJ1	6	0.0069439	0.022796	0.781387	632	3	-0.56192	0.77561	0.77543	1	16619	0	-0.56192
DDX39A	6	0.006986	0.022912	0.783685	633	2	-0.37002	0.53403	0.56555	1	12168	1	-0.37002
GAK	6	0.0069936	0.022936	0.783685	634	2	0.67145	0.010914	0.033183	0.915126	761	3	0.67145
C1orf74	6	0.0070296	0.023041	0.784362	635	4	-0.62436	0.56353	0.58665	1	12617	1	-0.62436
EEF1E1	6	0.0070303	0.023043	0.784362	636	4	-0.72569	0.7687	0.76856	1	16471	0	-0.72569
GUCY2C	6	0.007036	0.023064	0.784362	637	2	-0.30782	0.90564	0.90554	1	19494	0	-0.30782
LPCAT3	6	0.0070859	0.023204	0.786664	638	2	0.12751	0.15931	0.25918	0.993117	5649	1	0.12751
TCF12	6	0.007086	0.023204	0.786664	639	3	-0.22643	0.77632	0.77612	1	16635	0	-0.22643
PFDN4	6	0.0071083	0.023267	0.787554	640	3	-0.57074	0.97412	0.97402	1	20970	0	-0.57074
IQGAP3	6	0.0071358	0.023341	0.788812	641	2	-0.23532	0.20018	0.30348	0.994445	6610	2	-0.23532
DLG1	6	0.0071682	0.023443	0.791023	642	3	-0.52175	0.98742	0.9873	1	21288	0	-0.52175
DSCR6	6	0.0071889	0.023496	0.791579	643	2	-0.072971	0.94816	0.94823	1	20362	0	-0.072971
SEMA3F	6	0.0072357	0.023632	0.793788	644	2	0.071857	0.61935	0.62974	1	13541	1	0.071857
TM2D1	6	0.0072457	0.023658	0.793788	645	3	-0.80482	0.74007	0.73991	1	15871	0	-0.80482
ZNHIT1	6	0.0072502	0.023671	0.793788	646	3	-0.33608	0.85527	0.85525	1	18373	0	-0.33608
SERP1	6	0.0072752	0.023742	0.794933	647	3	-0.4644	0.23203	0.33799	0.999833	7315	1	-0.4644
NUDT12	6	0.0072979	0.023805	0.795474	648	3	-0.47635	0.24233	0.34913	0.999833	7563	1	-0.47635
hsa-mir-3180-4	4	0.007307	0.023832	0.795474	649	3	-1.0399	0.97868	0.97853	1	21077	0	-1.0399
NUMA1	6	0.0073292	0.02389	0.795707	650	4	-0.44606	0.070724	0.14815	0.97856	3279	1	-0.44606
NR6A1	6	0.0073355	0.023912	0.795707	651	1	-0.19047	0.84493	0.84489	1	18137	0	-0.19047
TMEM191B	6	0.0073605	0.023982	0.796825	652	2	-0.25083	0.98728	0.98716	1	21285	0	-0.25083
FAM24A	6	0.0073972	0.024079	0.798566	653	2	0.28248	0.64258	0.64889	1	13933	1	0.28248
SPTLC1	6	0.0074077	0.024108	0.798566	654	3	-0.73853	0.98636	0.98622	1	21263	0	-0.73853
EPAS1	6	0.0074354	0.024189	0.799316	655	4	-0.66968	0.99926	0.99924	1	21616	0	-0.66968
hsa-mir-6868	4	0.0074411	0.024205	0.799316	656	3	-1.1542	0.96647	0.96642	1	20795	0	-1.1542
SRGAP2B	4	0.0074883	0.024337	0.80244	657	2	-0.56709	0.94809	0.94815	1	20360	0	-0.56709
CASKIN1	6	0.0075076	0.024392	0.803056	658	2	-0.47096	0.88533	0.88504	1	19034	0	-0.47096
DNAJB14	6	0.0075365	0.02449	0.805053	659	4	-0.61675	0.27796	0.38798	1	8386	1	-0.61675
TMEM86A	6	0.0075851	0.024616	0.806856	660	1	-0.027884	0.75703	0.75686	1	16220	0	-0.027884
NUMB	6	0.007587	0.024619	0.806856	661	3	-0.52085	0.95129	0.95131	1	20429	0	-0.52085
SNAP23	6	0.0076044	0.024657	0.806863	662	3	-0.67688	0.98773	0.98761	1	21299	0	-0.67688
NAT16	6	0.0076455	0.024777	0.807794	663	3	-0.54575	0.56764	0.58971	1	12679	1	-0.54575
C12orf5	6	0.007648	0.024784	0.807794	664	4	-0.44012	0.99851	0.9985	1	21581	0	-0.44012
CALU	6	0.0076512	0.024797	0.807794	665	3	-0.77662	0.95991	0.95984	1	20649	0	-0.77662
SDHA	6	0.0076642	0.024836	0.80783	666	4	-1.0152	0.7503	0.75011	1	16093	0	-1.0152
TVP23B	6	0.0076849	0.024891	0.80843	667	4	-0.6431	0.99885	0.99884	1	21596	0	-0.6431
hsa-mir-135b	4	0.007729	0.025014	0.80904	668	1	-0.18087	0.58681	0.60422	1	12995	0	-0.18087
CCND1	6	0.0077348	0.025037	0.80904	669	3	-0.52026	0.93332	0.93339	1	20052	0	-0.52026
MED12	6	0.0077576	0.025105	0.80904	670	2	0.56855	0.036858	0.086313	0.96338	1925	3	0.56855
KDELR3	6	0.007763	0.025116	0.80904	671	3	-0.24924	0.14695	0.24505	0.993117	5341	2	-0.24924
NonTargetingControlGuideForHuman_0951	1	0.007764	0.025119	0.80904	672	1	-1.6355	0.99224	0.99216	1	21417	0	-1.6355
CPB1	6	0.0077847	0.025172	0.80904	673	1	0.87858	0.11621	0.21034	0.992328	4583	2	0.87858
TOMM40L	6	0.007789	0.025185	0.80904	674	4	-0.5674	0.95308	0.95305	1	20470	0	-0.5674
RXRG	6	0.0078054	0.025242	0.80904	675	4	-0.84242	0.92733	0.92743	1	19933	0	-0.84242
HCN2	6	0.0078068	0.025246	0.80904	676	3	-0.74955	0.85876	0.85874	1	18461	0	-0.74955
RIPK4	6	0.0078845	0.025451	0.814207	677	2	0.42809	0.033988	0.080985	0.96338	1811	3	0.42809
NAE1	6	0.0079015	0.025504	0.814207	678	4	-0.95722	0.25763	0.36578	0.999919	7919	1	-0.95722
SIDT2	6	0.0079061	0.02552	0.814207	679	4	-0.58191	0.16104	0.26114	0.993117	5679	2	-0.58191
C11orf85	6	0.0079571	0.025664	0.816832	680	3	-0.91386	0.87384	0.87372	1	18781	0	-0.91386
PSTK	6	0.0079625	0.025678	0.816832	681	3	-1.3621	0.95809	0.95804	1	20596	0	-1.3621
DUSP27	6	0.0079842	0.025743	0.81718	682	2	0.030712	0.8571	0.85705	1	18425	0	0.030712
CD84	6	0.0079909	0.025764	0.81718	683	4	-0.51917	0.97758	0.97744	1	21050	0	-0.51917
hsa-mir-6795	4	0.0080286	0.025864	0.817751	684	2	-0.48843	0.25593	0.36387	0.999919	7882	1	-0.48843
WNK3	6	0.008081	0.026006	0.817751	685	4	-0.61839	0.9919	0.99183	1	21405	0	-0.61839
GPN2	6	0.0080823	0.026011	0.817751	686	2	-0.16771	0.83007	0.82988	1	17810	0	-0.16771
C15orf41	6	0.0080932	0.02604	0.817751	687	3	-0.71019	0.21515	0.31965	0.999387	6925	2	-0.71019
YTHDC1	6	0.0081206	0.026115	0.817751	688	3	-0.28763	0.088949	0.17945	0.987867	3933	2	-0.28763
RPL27	6	0.0081532	0.026202	0.817751	689	4	-1.1287	0.52197	0.5571	1	12010	1	-1.1287
TRAPPC1	6	0.0081535	0.026203	0.817751	690	3	-0.50346	0.96507	0.965	1	20762	0	-0.50346
TAF5	6	0.0081699	0.02625	0.817751	691	3	-0.54435	0.095208	0.18662	0.988234	4083	1	-0.54435
NUP160	6	0.0081838	0.026277	0.817751	692	2	-0.12069	0.22223	0.32725	0.999387	7079	2	-0.12069
TSEN54	6	0.0082313	0.026407	0.817751	693	3	-0.40272	0.18099	0.28276	0.993117	6153	2	-0.40272
SRP68	6	0.0082337	0.026414	0.817751	694	2	0.087251	0.42883	0.49692	1	10699	1	0.087251
LAGE3	6	0.0082359	0.026422	0.817751	695	3	-0.34585	0.29929	0.41119	1	8847	1	-0.34585
TNFRSF13B	6	0.0082411	0.026436	0.817751	696	4	-1.0408	0.9838	0.98367	1	21200	0	-1.0408
DNAJC30	6	0.0082435	0.026443	0.817751	697	3	-0.54332	0.5186	0.55481	1	11961	1	-0.54332
CCDC53	6	0.0082836	0.026542	0.817751	698	2	-0.34424	0.9635	0.96339	1	20725	0	-0.34424
FZR1	6	0.0082976	0.026582	0.817751	699	4	-0.7901	0.47471	0.52561	1	11323	1	-0.7901
ELK4	6	0.0083069	0.026608	0.817751	700	4	-0.58874	0.99948	0.99945	1	21622	0	-0.58874
RIMBP3B	6	0.0083149	0.026628	0.817751	701	4	-0.63849	0.87301	0.87291	1	18763	0	-0.63849
RTBDN	6	0.0083163	0.026635	0.817751	702	4	-0.47799	0.63489	0.64246	1	13791	1	-0.47799
ELTD1	6	0.0083241	0.026658	0.817751	703	4	-0.64528	0.49556	0.53922	1	11629	1	-0.64528
TAF11	6	0.0083346	0.026687	0.817751	704	3	-0.34263	0.36858	0.46182	1	9917	1	-0.34263
PPP2CA	6	0.0083396	0.026699	0.817751	705	3	-0.49539	0.31116	0.42423	1	9114	1	-0.49539
HDC	6	0.0083414	0.026706	0.817751	706	4	-0.59695	0.42021	0.4918	1	10588	1	-0.59695
KCTD15	6	0.0083643	0.026765	0.817751	707	4	-0.66715	0.44187	0.50487	1	10860	1	-0.66715
NUTF2	6	0.0083834	0.026816	0.817751	708	2	0.033866	0.79784	0.79765	1	17119	0	0.033866
PTCHD2	6	0.0083854	0.026823	0.817751	709	3	-0.45949	0.88988	0.88968	1	19128	0	-0.45949
hsa-mir-6887	4	0.0084045	0.02687	0.817751	710	3	-0.91799	0.41556	0.48907	1	10538	1	-0.91799
hsa-mir-184	4	0.0084168	0.026904	0.817751	711	3	-0.77802	0.9815	0.98133	1	21152	0	-0.77802
RELL1	6	0.0084243	0.026924	0.817751	712	2	0.17426	0.44762	0.50842	1	10949	1	0.17426
hsa-mir-3124	4	0.0084306	0.026944	0.817751	713	3	-0.53083	0.9177	0.91775	1	19744	0	-0.53083
THRSP	6	0.0084354	0.026959	0.817751	714	2	-0.63656	0.66005	0.664	1	14247	1	-0.63656
UBA52	6	0.0084488	0.026998	0.817751	715	3	-0.9007	0.56571	0.58827	1	12650	1	-0.9007
ZNF679	6	0.0084587	0.027028	0.817751	716	3	-0.29584	0.88075	0.88053	1	18941	0	-0.29584
KRT39	6	0.0084831	0.027098	0.81871	717	2	-0.33268	0.016931	0.047803	0.938848	1103	2	-0.33268
EBAG9	6	0.0085136	0.027187	0.820272	718	2	-0.046052	0.64878	0.65425	1	14045	1	-0.046052
NCAM1	6	0.0085549	0.027294	0.822256	719	4	-0.39349	0.29299	0.4043	1	8718	1	-0.39349
GTF3C6	6	0.0085714	0.027338	0.822256	720	3	-0.34833	0.87335	0.87325	1	18771	0	-0.34833
HNRNPL	6	0.0085828	0.027367	0.822256	721	3	-0.44969	0.18555	0.28763	0.993689	6264	2	-0.44969
SLC39A14	6	0.0085996	0.027411	0.822447	722	4	-0.68003	0.35326	0.45331	1	9730	1	-0.68003
ZNF664	6	0.0086327	0.027494	0.823802	723	2	-0.23077	0.93624	0.93633	1	20118	0	-0.23077
EGR2	6	0.0086687	0.027587	0.825144	724	4	-1.1915	0.9919	0.99183	1	21407	0	-1.1915
DTYMK	6	0.0086826	0.027621	0.825144	725	3	-0.67385	0.95234	0.95234	1	20452	0	-0.67385
hsa-mir-6753	4	0.008694	0.027653	0.825144	726	2	-0.86546	0.17498	0.27627	0.993117	6008	1	-0.86546
FEM1B	6	0.0087324	0.027757	0.825456	727	2	-0.021557	0.79162	0.79149	1	16964	0	-0.021557
C20orf111	6	0.0087462	0.027801	0.825456	728	4	-0.47788	0.99663	0.99658	1	21530	0	-0.47788
RPAP2	6	0.0087689	0.027849	0.825456	729	3	-0.0036575	0.2638	0.37251	1	8059	1	-0.0036575
FZD5	6	0.0087689	0.027849	0.825456	730	4	-0.48218	0.96835	0.96827	1	20844	0	-0.48218
ZNF93	5	0.0088062	0.027955	0.825456	731	4	-0.5858	0.09009	0.18072	0.988043	3959	1	-0.5858
AKAP6	6	0.0088126	0.027971	0.825456	732	2	-0.25095	0.49865	0.54136	1	11672	1	-0.25095
SETD1A	6	0.0088174	0.027984	0.825456	733	3	-0.41713	0.64884	0.6543	1	14047	1	-0.41713
CCDC28B	6	0.008824	0.028005	0.825456	734	4	-0.61484	0.81426	0.81412	1	17471	0	-0.61484
GBA	6	0.0088321	0.028032	0.825456	735	1	-0.39888	0.16719	0.26798	0.993117	5826	1	-0.39888
PKMYT1	6	0.0088471	0.028078	0.825456	736	4	-0.85233	0.34649	0.44965	1	9650	1	-0.85233
RFXANK	6	0.0088487	0.028083	0.825456	737	4	-0.64865	0.47527	0.526	1	11329	1	-0.64865
CFL1	6	0.008882	0.028175	0.826446	738	2	-0.38465	0.50217	0.54367	1	11731	1	-0.38465
PTX4	6	0.0088924	0.028208	0.826446	739	3	-0.082763	0.70252	0.70272	1	15096	1	-0.082763
GJC3	6	0.008906	0.028246	0.826446	740	4	-0.51953	0.10161	0.19392	0.989814	4236	2	-0.51953
ZC3H15	6	0.0089153	0.028272	0.826446	741	3	-0.51108	0.39884	0.47918	1	10309	1	-0.51108
SUV39H1	6	0.0089325	0.028307	0.826446	742	4	-0.48019	0.39624	0.47765	1	10272	1	-0.48019
DDX55	6	0.0089817	0.02844	0.827642	743	3	-0.75859	0.87872	0.87856	1	18896	0	-0.75859
LRCH4	6	0.0090012	0.028499	0.827642	744	4	-0.91138	0.79201	0.79187	1	16976	0	-0.91138
PAMR1	6	0.0090028	0.028501	0.827642	745	3	-0.15646	0.62324	0.63291	1	13597	1	-0.15646
PRDM5	6	0.0090032	0.028501	0.827642	746	4	-0.58223	0.56194	0.58551	1	12582	1	-0.58223
EMC4	6	0.0090261	0.028566	0.82802	747	3	-0.42427	0.51195	0.55029	1	11864	1	-0.42427
NonTargetingControlGuideForHuman_0386	1	0.0090364	0.028593	0.82802	748	1	-1.1178	0.99096	0.99088	1	21381	0	-1.1178
CCDC181	6	0.0090547	0.028644	0.82802	749	3	-0.93136	0.40225	0.48117	1	10365	1	-0.93136
MMP10	6	0.0090625	0.028667	0.82802	750	3	-0.39422	0.27564	0.38546	1	8342	2	-0.39422
RUNDC1	6	0.0090779	0.028712	0.828222	751	4	-0.79116	0.28839	0.3993	1	8607	1	-0.79116
STRAP	6	0.0091165	0.028826	0.830399	752	4	-0.67579	0.62813	0.63693	1	13677	1	-0.67579
hsa-mir-8066	4	0.0091597	0.028955	0.833005	753	3	-0.57317	0.98429	0.98418	1	21211	0	-0.57317
NAA10	6	0.0092091	0.029089	0.835448	754	3	-0.68379	0.99266	0.9926	1	21431	0	-0.68379
DIMT1	6	0.0092194	0.029125	0.835448	755	3	-0.5378	0.26212	0.3707	1	8020	2	-0.5378
WBSCR16	6	0.0092309	0.029156	0.835448	756	3	-0.53506	0.47626	0.52666	1	11345	1	-0.53506
TRIM13	6	0.0092504	0.029204	0.835718	757	4	-0.60679	0.99093	0.99086	1	21380	0	-0.60679
DYNLT3	6	0.0092808	0.029279	0.836725	758	2	-0.10161	0.68376	0.68512	1	14707	1	-0.10161
FAM9B	6	0.009296	0.029316	0.836725	759	4	-0.62417	0.91816	0.91825	1	19754	0	-0.62417
MED11	6	0.0093306	0.029423	0.838672	760	2	-0.15815	0.67995	0.68164	1	14626	1	-0.15815
PC	6	0.0093451	0.029463	0.838702	761	4	-0.61138	0.74571	0.74548	1	15988	0	-0.61138
MAN1A1	6	0.009394	0.029608	0.841734	762	3	-0.44547	0.19378	0.29663	0.994216	6449	1	-0.44547
ITGB2	6	0.009425	0.029696	0.842498	763	2	0.3707	0.80969	0.80954	1	17373	0	0.3707
OTP	6	0.0094446	0.029745	0.842498	764	3	-0.49703	0.5779	0.59738	1	12839	1	-0.49703
hsa-mir-4296	4	0.0094538	0.029768	0.842498	765	3	-0.82109	0.89135	0.89113	1	19167	0	-0.82109
NonTargetingControlGuideForHuman_0595	1	0.0094717	0.029815	0.842498	766	1	-0.893	0.99053	0.99046	1	21374	0	-0.893
PSMD11	6	0.0094801	0.029838	0.842498	767	1	0.56157	0.10065	0.19282	0.989814	4213	1	0.56157
KDM4A	6	0.0094956	0.029888	0.842498	768	3	-0.061936	0.67509	0.67731	1	14532	1	-0.061936
C7orf26	6	0.0095299	0.029997	0.842498	769	2	0.16449	0.03138	0.075996	0.96338	1706	2	0.16449
RPS16	6	0.0095303	0.029998	0.842498	770	3	-0.39064	0.43728	0.50207	1	10800	1	-0.39064
TTC3	6	0.0095314	0.030001	0.842498	771	4	-0.53547	0.93165	0.93172	1	20023	0	-0.53547
NYAP1	6	0.0095487	0.030054	0.842498	772	4	-0.725	0.50648	0.54659	1	11781	1	-0.725
ALG6	6	0.0095706	0.030112	0.842498	773	4	-0.66816	0.64596	0.65183	1	13998	1	-0.66816
MBD3	6	0.0095733	0.030119	0.842498	774	4	-0.81105	0.96998	0.96985	1	20885	0	-0.81105
KIF3A	6	0.0095797	0.030141	0.842498	775	2	0.55577	0.27124	0.38062	1	8232	1	0.55577
ERN1	6	0.0095953	0.030189	0.842764	776	4	-0.65391	0.64477	0.6508	1	13973	1	-0.65391
NLRP1	6	0.0096407	0.030304	0.844878	777	4	-0.68879	0.85468	0.85467	1	18358	0	-0.68879
SLC26A1	6	0.0096794	0.0304	0.846212	778	2	-0.34483	0.01599	0.045878	0.928359	1070	1	-0.34483
ITM2A	6	0.0096977	0.030449	0.846212	779	4	-0.51741	0.60324	0.61686	1	13238	1	-0.51741
CASP5	6	0.0097193	0.030505	0.846212	780	3	-0.41513	0.74849	0.74831	1	16051	0	-0.41513
FAM21B	6	0.0097292	0.030528	0.846212	781	2	0.0035241	0.27842	0.38849	1	8395	1	0.0035241
ADHFE1	6	0.0097356	0.030547	0.846212	782	3	-1.7284	0.54234	0.57137	1	12277	1	-1.7284
STAG1	6	0.0097711	0.030644	0.847317	783	4	-0.64753	0.97586	0.97574	1	21015	0	-0.64753
CDH12	6	0.009779	0.03067	0.847317	784	2	0.00060659	0.74122	0.74103	1	15896	0	0.00060659
TOMM70A	6	0.009792	0.030704	0.847317	785	2	-0.086815	0.81334	0.81321	1	17449	0	-0.086815
TUFM	6	0.0098119	0.030745	0.84736	786	3	-0.065941	0.56599	0.58847	1	12655	1	-0.065941
CTSW	6	0.0098288	0.030793	0.847617	787	3	-0.00017726	0.023572	0.061193	0.94552	1402	2	-0.00017726
NEUROG2	6	0.0098638	0.030892	0.848112	788	2	-0.34165	0.99569	0.99568	1	21507	0	-0.34165
DUOXA1	6	0.0098801	0.030938	0.848112	789	4	-0.7939	0.29224	0.40347	1	8702	1	-0.7939
VSTM4	6	0.0098804	0.030938	0.848112	790	3	-0.26217	0.030403	0.074107	0.96338	1660	2	-0.26217
LMAN2L	6	0.0098938	0.030972	0.848112	791	2	-0.45121	0.90667	0.90656	1	19517	0	-0.45121
AQP8	6	0.0099285	0.031068	0.848112	792	2	-0.11018	0.24607	0.35317	0.999909	7641	1	-0.11018
JAG1	6	0.0099421	0.031105	0.848112	793	4	-0.66077	0.59574	0.61104	1	13115	1	-0.66077
C6orf58	6	0.0099479	0.031121	0.848112	794	2	0.17552	0.082539	0.16886	0.985034	3713	2	0.17552
ZNF37A	6	0.0099659	0.031174	0.848112	795	3	-0.5748	0.57709	0.59678	1	12827	1	-0.5748
NR1I2	6	0.0099705	0.031184	0.848112	796	4	-0.55323	0.89036	0.89013	1	19139	0	-0.55323
MYBPH	6	0.0099776	0.031203	0.848112	797	4	-0.95435	0.86891	0.86889	1	18662	0	-0.95435
FBXW12	6	0.0099971	0.031258	0.848551	798	4	-0.59586	0.64564	0.65157	1	13991	1	-0.59586
SMURF1	6	0.010013	0.031307	0.848815	799	4	-0.69531	0.46482	0.51924	1	11183	1	-0.69531
BAP1	6	0.010096	0.03153	0.853806	800	3	0.47747	0.0015667	0.0061	0.87035	145	3	0.47747
ENDOV	6	0.010128	0.031612	0.85494	801	1	0.2589	0.52124	0.55658	1	11998	1	0.2589
KRT34	6	0.010183	0.031759	0.857511	802	4	-0.77903	0.71986	0.71974	1	15455	0	-0.77903
CASP12	6	0.010208	0.031823	0.857511	803	3	-0.75717	0.5531	0.5791	1	12456	1	-0.75717
COG1	6	0.010216	0.031844	0.857511	804	4	-0.71252	0.63963	0.64641	1	13884	1	-0.71252
EED	6	0.010227	0.031877	0.857511	805	3	-0.61341	0.98821	0.98812	1	21315	0	-0.61341
BANF1	6	0.010239	0.031905	0.857511	806	2	-0.16188	0.0051144	0.016649	0.915126	377	2	-0.16188
MRPS31	6	0.010352	0.032225	0.864713	807	4	-0.77621	0.86025	0.86021	1	18486	0	-0.77621
CTAG2	5	0.010368	0.032268	0.864713	808	4	-0.41756	0.99755	0.99751	1	21553	0	-0.41756
GATS	6	0.01039	0.032325	0.864713	809	3	0.27901	0.02297	0.05999	0.943931	1374	3	0.27901
BRF1	6	0.010411	0.032378	0.864713	810	4	-0.67667	0.82804	0.8279	1	17771	0	-0.67667
BRF2	6	0.010426	0.032418	0.864713	811	2	0.3083	0.21204	0.31635	0.998581	6856	2	0.3083
METTL12	6	0.010436	0.032444	0.864713	812	4	-0.76553	0.17303	0.27416	0.993117	5956	2	-0.76553
ZNF658	6	0.010444	0.032464	0.864713	813	4	-0.58582	0.057224	0.1238	0.972773	2756	2	-0.58582
PPIE	6	0.010453	0.032492	0.864713	814	2	-0.43311	0.40591	0.48335	1	10409	1	-0.43311
FAM64A	6	0.01049	0.032595	0.865188	815	2	-0.068639	0.94148	0.94155	1	20230	0	-0.068639
TNFSF12-TNFSF13	5	0.010502	0.032632	0.865188	816	3	-1.773	0.17248	0.27355	0.993117	5943	2	-1.773
ZHX3	6	0.010521	0.032691	0.865188	817	2	-0.37335	0.0667	0.14104	0.977122	3119	1	-0.37335
NFIB	6	0.010526	0.032709	0.865188	818	4	-0.72468	0.49975	0.54207	1	11687	1	-0.72468
MARK2	6	0.010526	0.03271	0.865188	819	4	-0.76858	0.79055	0.79044	1	16945	0	-0.76858
SSR2	6	0.010558	0.03279	0.866258	820	4	-0.53101	0.96646	0.96641	1	20794	0	-0.53101
TM6SF2	6	0.010595	0.0329	0.867571	821	4	-0.67933	0.99571	0.99571	1	21508	0	-0.67933
ICAM1	6	0.010601	0.03292	0.867571	822	2	-0.5503	0.12524	0.22047	0.992328	4782	1	-0.5503
C15orf59	6	0.01063	0.033002	0.868317	823	4	-0.39909	0.81485	0.81472	1	17486	0	-0.39909
PRSS50	6	0.010647	0.033042	0.868317	824	3	-0.67886	0.19533	0.29826	0.994216	6487	1	-0.67886
RPL12	6	0.010654	0.033068	0.868317	825	4	-1.7393	0.99547	0.99545	1	21500	0	-1.7393
SLC16A8	6	0.010725	0.033267	0.87182	826	1	0.25541	0.33767	0.44485	1	9529	1	0.25541
ZNF862	6	0.010732	0.033282	0.87182	827	3	-0.40406	0.50301	0.54424	1	11736	1	-0.40406
hsa-mir-124-3	3	0.010808	0.033497	0.87309	828	2	-0.67364	0.71546	0.71533	1	15348	0	-0.67364
CORO1B	6	0.010819	0.033523	0.87309	829	3	-0.38192	0.88955	0.88936	1	19122	0	-0.38192
OVGP1	6	0.010825	0.033542	0.87309	830	1	0.16162	0.76004	0.75985	1	16284	0	0.16162
ALG3	6	0.010832	0.033559	0.87309	831	4	-0.56063	0.049616	0.11002	0.967059	2456	2	-0.56063
PTGFRN	6	0.010869	0.033669	0.87309	832	3	-0.3425	0.96319	0.96307	1	20719	0	-0.3425
RNASEK	6	0.010874	0.03368	0.87309	833	3	-0.23249	0.29107	0.40219	1	8675	1	-0.23249
hsa-mir-3188	4	0.010898	0.033737	0.87309	834	2	-1.1613	0.43175	0.49869	1	10731	1	-1.1613
hsa-mir-3166	4	0.010906	0.033761	0.87309	835	3	-0.57117	0.0091597	0.028228	0.915126	651	1	-0.57117
TSC22D3	6	0.010913	0.033778	0.87309	836	3	-0.464	0.82227	0.82218	1	17647	0	-0.464
NELFE	6	0.010924	0.033808	0.87309	837	2	-0.13924	0.18102	0.28279	0.993117	6154	1	-0.13924
NDUFS7	6	0.010938	0.033844	0.87309	838	2	0.060659	0.33037	0.4409	1	9436	1	0.060659
CXXC1	6	0.010943	0.033855	0.87309	839	4	-0.80631	0.64642	0.65222	1	14008	1	-0.80631
SOX9	6	0.010974	0.033943	0.87309	840	1	-0.25899	0.73926	0.73904	1	15846	0	-0.25899
IFI35	6	0.011001	0.034021	0.87309	841	4	-0.64777	0.99567	0.99567	1	21506	0	-0.64777
HSP90B1	6	0.011001	0.034023	0.87309	842	2	-0.063081	0.45669	0.5141	1	11071	1	-0.063081
BDKRB2	6	0.011036	0.034116	0.87309	843	3	-0.79945	0.29323	0.40457	1	8721	2	-0.79945
NLRP3	6	0.011039	0.034123	0.87309	844	3	-0.55125	0.93586	0.93595	1	20113	0	-0.55125
CRYZ	6	0.011072	0.034197	0.87309	845	3	-0.36462	0.87584	0.8757	1	18826	0	-0.36462
ALOX15B	6	0.011119	0.03433	0.87309	846	3	-0.50969	0.97921	0.97903	1	21091	0	-0.50969
TRMT61A	6	0.011123	0.034339	0.87309	847	4	-0.35656	0.54613	0.57403	1	12342	1	-0.35656
PIK3R4	6	0.011146	0.0344	0.87309	848	3	-0.50358	0.99838	0.99838	1	21574	0	-0.50358
ARNT	6	0.011153	0.034417	0.87309	849	3	-0.36236	0.91468	0.9147	1	19666	0	-0.36236
RFX5	6	0.011161	0.03444	0.87309	850	4	-0.49294	0.97224	0.97213	1	20930	0	-0.49294
SIRPA	6	0.011169	0.034464	0.87309	851	3	-0.53842	0.037278	0.087109	0.96338	1946	2	-0.53842
SLC25A37	6	0.011173	0.034471	0.87309	852	1	-0.039131	0.87051	0.87045	1	18692	0	-0.039131
RANBP1	6	0.011203	0.034563	0.87309	853	4	-0.7398	0.99842	0.99842	1	21577	0	-0.7398
RFC1	6	0.011208	0.034574	0.87309	854	4	-2.1589	0.062377	0.13325	0.976213	2955	1	-2.1589
SLC18A1	6	0.01122	0.034603	0.87309	855	3	-0.3181	0.5732	0.59387	1	12771	1	-0.3181
TTLL12	6	0.011222	0.034611	0.87309	856	3	-0.20249	0.61429	0.62564	1	13437	1	-0.20249
AKT1	6	0.011223	0.034612	0.87309	857	1	-0.017184	0.49192	0.53678	1	11566	1	-0.017184
PRR20A	6	0.011246	0.034678	0.87309	858	3	-0.24559	0.66592	0.66918	1	14347	1	-0.24559
ZMYND10	6	0.01126	0.034711	0.87309	859	4	-0.75799	0.7069	0.70699	1	15180	1	-0.75799
ALS2CR11	6	0.011267	0.034724	0.87309	860	2	-0.052729	0.31663	0.43037	1	9227	2	-0.052729
FAM69B	6	0.011269	0.034735	0.87309	861	4	-0.65462	0.93793	0.93797	1	20148	0	-0.65462
C12orf76	6	0.0113	0.034814	0.87309	862	3	-0.48797	0.18153	0.28334	0.993117	6170	1	-0.48797
MED15	6	0.0113	0.034817	0.87309	863	4	-0.85481	0.99713	0.9971	1	21540	0	-0.85481
ARSI	6	0.011308	0.034839	0.87309	864	4	-0.42885	0.75969	0.75948	1	16275	0	-0.42885
SERPINA6	6	0.011318	0.034862	0.87309	865	2	-0.24303	0.37706	0.4666	1	10029	1	-0.24303
PCNXL3	6	0.011353	0.034952	0.873577	866	4	-0.83566	0.99762	0.99758	1	21559	0	-0.83566
TAB3	6	0.011356	0.034962	0.873577	867	2	0.1924	0.63905	0.64595	1	13872	1	0.1924
CDK5R1	6	0.011372	0.035007	0.873583	868	1	0.52704	0.071608	0.14972	0.979789	3304	3	0.52704
TRAM2	6	0.011386	0.035043	0.873583	869	4	-0.51354	0.46774	0.52113	1	11225	1	-0.51354
SLC38A2	6	0.01142	0.035143	0.87506	870	2	-0.21386	0.74125	0.74107	1	15897	0	-0.21386
SUGT1	4	0.011452	0.035226	0.87558	871	2	-0.42656	0.66372	0.66724	1	14317	0	-0.42656
TEAD1	6	0.011461	0.035254	0.87558	872	3	-0.448	0.58954	0.60631	1	13032	1	-0.448
ACACA	6	0.011472	0.035285	0.87558	873	1	0.2375	0.27079	0.38016	1	8218	2	0.2375
DDT	6	0.01151	0.035393	0.877132	874	3	-0.21764	0.88302	0.88279	1	18987	0	-0.21764
PDCD6	6	0.011525	0.035429	0.877132	875	4	-0.52633	0.93492	0.93501	1	20086	0	-0.52633
ZNF185	6	0.011551	0.035504	0.877329	876	4	-0.50675	0.99249	0.99242	1	21426	0	-0.50675
LCE1F	6	0.011592	0.035614	0.877329	877	4	-0.47257	0.99066	0.99058	1	21376	0	-0.47257
SMTNL2	6	0.0116	0.035647	0.877329	878	4	-0.68648	0.98797	0.98787	1	21306	0	-0.68648
RNASEH2B	6	0.011633	0.035731	0.877329	879	2	-0.10131	0.42987	0.49756	1	10708	1	-0.10131
MTSS1L	6	0.011653	0.035778	0.877329	880	4	-0.3771	0.54462	0.57296	1	12313	1	-0.3771
DNASE1	6	0.011667	0.035813	0.877329	881	4	-0.55128	0.69967	0.69999	1	15049	1	-0.55128
hsa-mir-4488	4	0.011669	0.035818	0.877329	882	3	-0.66156	0.79877	0.79859	1	17134	0	-0.66156
KLHL40	6	0.011671	0.03582	0.877329	883	1	0.080188	0.346	0.44937	1	9644	1	0.080188
CBWD2	2	0.011705	0.035909	0.877329	884	2	-1.7349	0.98829	0.9882	1	21318	0	-1.7349
EIF2B1	6	0.011711	0.035921	0.877329	885	3	-0.72156	0.032817	0.078757	0.96338	1760	1	-0.72156
NKX2-1	6	0.01172	0.035949	0.877329	886	1	-0.19486	0.78462	0.78448	1	16828	0	-0.19486
WAS	6	0.01173	0.035973	0.877329	887	2	-0.35668	0.24504	0.35206	0.999909	7615	1	-0.35668
DPY30	6	0.011737	0.035987	0.877329	888	4	-0.68971	0.96661	0.96656	1	20799	0	-0.68971
CNKSR2	6	0.011743	0.036004	0.877329	889	2	-0.18207	0.41583	0.48923	1	10542	1	-0.18207
SSPN	6	0.011762	0.036047	0.877411	890	3	-0.44694	0.84833	0.84832	1	18219	0	-0.44694
NPBWR2	6	0.011783	0.0361	0.877716	891	3	-0.28062	0.099957	0.19206	0.989814	4197	1	-0.28062
SOX6	6	0.011834	0.036254	0.880461	892	3	-0.37084	0.068311	0.14391	0.977122	3182	1	-0.37084
PAGR1	6	0.011867	0.03635	0.880844	893	2	-0.21827	0.60081	0.61498	1	13202	1	-0.21827
SUDS3	6	0.011883	0.036388	0.880844	894	4	-0.67386	0.9869	0.98677	1	21277	0	-0.67386
FAM25A	6	0.011919	0.036483	0.880844	895	2	-0.36036	0.34617	0.44947	1	9646	1	-0.36036
hsa-mir-6820	4	0.011928	0.036503	0.880844	896	2	-0.41396	0.20536	0.30912	0.996432	6716	1	-0.41396
PTBP3	6	0.011933	0.036515	0.880844	897	4	-0.77854	0.51222	0.55048	1	11866	1	-0.77854
TAF12	6	0.011969	0.0366	0.880844	898	3	-0.2756	0.53993	0.56964	1	12243	1	-0.2756
FRMPD1	6	0.011978	0.036626	0.880844	899	2	-0.042051	0.32932	0.44034	1	9422	1	-0.042051
VPS18	6	0.011984	0.03664	0.880844	900	4	-0.70939	0.32307	0.43691	1	9362	1	-0.70939
C22orf28	6	0.01202	0.036728	0.880844	901	3	-0.62193	0.84915	0.84914	1	18234	0	-0.62193
FCRLA	6	0.012032	0.036765	0.880844	902	3	-0.61873	0.97836	0.97822	1	21072	0	-0.61873
APOBR	6	0.012041	0.036785	0.880844	903	3	-0.36497	0.14217	0.2396	0.992328	5225	2	-0.36497
SLC8A3	6	0.012048	0.036807	0.880844	904	4	-0.44085	0.39134	0.47479	1	10207	1	-0.44085
SYNPO	6	0.01205	0.036813	0.880844	905	3	-0.61085	0.94679	0.94687	1	20327	0	-0.61085
CLCC1	6	0.01206	0.036839	0.880844	906	3	-0.61959	0.28296	0.39339	1	8486	1	-0.61959
GSTT2	6	0.012076	0.036885	0.880975	907	2	0.031085	0.42893	0.49698	1	10700	1	0.031085
IFITM2	6	0.012128	0.037036	0.883525	908	3	-0.52872	0.79092	0.7908	1	16953	0	-0.52872
CENPI	6	0.012166	0.037143	0.883525	909	3	-0.82087	0.44759	0.50841	1	10948	1	-0.82087
NOL9	6	0.012168	0.03715	0.883525	910	2	0.029175	0.69001	0.6909	1	14850	1	0.029175
WDR55	6	0.012195	0.037222	0.883525	911	4	-0.80336	0.98331	0.98316	1	21192	0	-0.80336
SKOR1	6	0.012197	0.037226	0.883525	912	3	-0.6196	0.90771	0.90762	1	19533	0	-0.6196
GPR1	6	0.012203	0.037237	0.883525	913	3	-0.65507	0.4139	0.48807	1	10514	1	-0.65507
ZFYVE1	6	0.012244	0.037337	0.884942	914	4	-0.63219	0.56206	0.5856	1	12585	1	-0.63219
WDR24	6	0.012269	0.037401	0.885409	915	3	-0.43963	0.9169	0.91696	1	19726	0	-0.43963
OR2T8	6	0.012283	0.037439	0.885409	916	4	-0.45917	0.79313	0.793	1	17004	0	-0.45917
WNT9A	6	0.012317	0.037531	0.886263	917	1	0.19694	0.2291	0.33476	0.999645	7248	2	0.19694
C1orf85	6	0.012326	0.037557	0.886263	918	4	-0.60587	0.14834	0.24661	0.993117	5371	1	-0.60587
WNT8A	6	0.012367	0.03766	0.887733	919	2	-0.10471	0.89494	0.89475	1	19249	0	-0.10471
hsa-mir-6805	4	0.012447	0.037886	0.892095	920	3	-0.54675	0.98281	0.98264	1	21180	0	-0.54675
USP37	6	0.012471	0.037962	0.892232	921	4	-0.55462	0.795	0.7948	1	17052	0	-0.55462
hsa-mir-6737	4	0.012481	0.037985	0.892232	922	2	0.16374	0.12659	0.22203	0.992328	4815	1	0.16374
PRPF8	6	0.012492	0.038015	0.892232	923	4	-0.61758	0.66213	0.66585	1	14289	1	-0.61758
INPP5K	6	0.012514	0.038073	0.89242	924	3	-0.26607	0.32024	0.43441	1	9309	2	-0.26607
MTOR	6	0.012527	0.038117	0.89242	925	3	-0.86982	0.9542	0.95416	1	20501	0	-0.86982
KIF9	6	0.012541	0.038147	0.89242	926	2	-0.15589	0.14667	0.24473	0.993117	5335	1	-0.15589
SBDS	6	0.012636	0.038412	0.896892	927	4	-0.73479	0.65259	0.6575	1	14110	1	-0.73479
NAA16	6	0.012648	0.038442	0.896892	928	4	-0.6534	0.77713	0.77698	1	16659	0	-0.6534
TAF1	6	0.012654	0.038462	0.896892	929	4	-0.57625	0.98353	0.9834	1	21198	0	-0.57625
FCRL2	6	0.012677	0.038523	0.897344	930	3	-0.22894	0.71942	0.71931	1	15445	0	-0.22894
ITGA6	6	0.012705	0.038606	0.898315	931	4	-0.50184	0.65146	0.65656	1	14091	1	-0.50184
MYO16	6	0.012764	0.038762	0.90069	932	1	-0.031911	0.50998	0.54897	1	11830	1	-0.031911
DOC2A	6	0.012777	0.038802	0.90069	933	3	-0.010249	0.13742	0.23416	0.992328	5099	2	-0.010249
GPR89A	6	0.012814	0.038915	0.90069	934	3	-0.61124	0.97799	0.97784	1	21059	0	-0.61124
CRHBP	6	0.01283	0.038956	0.90069	935	2	-0.15526	0.68903	0.68999	1	14827	1	-0.15526
BST2	6	0.012843	0.038997	0.90069	936	2	-0.12339	0.92888	0.92896	1	19968	0	-0.12339
DUSP22	6	0.012857	0.039032	0.90069	937	2	-0.38034	0.91103	0.911	1	19593	0	-0.38034
ID1	6	0.012864	0.039042	0.90069	938	2	0.027677	0.62056	0.63075	1	13556	1	0.027677
RBM14-RBM4	4	0.012874	0.039069	0.90069	939	2	-0.50765	0.98321	0.98306	1	21189	0	-0.50765
INTS12	6	0.012879	0.039083	0.90069	940	4	-1.0196	0.90568	0.90557	1	19495	0	-1.0196
SLC35F6	6	0.012918	0.039184	0.902058	941	2	-0.025488	0.91066	0.91063	1	19588	0	-0.025488
NSMCE4A	6	0.012963	0.039305	0.903886	942	2	-0.020141	0.42618	0.49534	1	10664	1	-0.020141
AOC3	6	0.013007	0.039439	0.905507	943	4	-0.50633	0.90015	0.89997	1	19344	0	-0.50633
PTK2	6	0.01304	0.039526	0.905507	944	2	0.20264	0.2592	0.36752	0.999919	7959	2	0.20264
RGS5	6	0.013093	0.039671	0.905507	945	4	-0.6059	0.94027	0.94031	1	20200	0	-0.6059
BDP1	6	0.0131	0.03969	0.905507	946	3	-0.38887	0.22549	0.3308	0.999387	7163	2	-0.38887
ITGA10	6	0.013103	0.039704	0.905507	947	3	-0.56099	0.54124	0.57058	1	12258	1	-0.56099
SNX33	6	0.013169	0.039869	0.905507	948	4	-0.78313	0.98173	0.98155	1	21159	0	-0.78313
RTCB	4	0.013177	0.039899	0.905507	949	2	-0.71698	0.12613	0.22152	0.992328	4799	1	-0.71698
USP17L12	1	0.01318	0.039908	0.905507	950	1	-0.82176	0.98682	0.9867	1	21274	0	-0.82176
NTN5	6	0.013205	0.039983	0.905507	951	4	-0.86925	0.31042	0.42341	1	9096	1	-0.86925
CAST	6	0.013211	0.040002	0.905507	952	3	-0.62944	0.49989	0.54217	1	11690	1	-0.62944
POLR3B	6	0.013218	0.040015	0.905507	953	2	-0.49576	0.82737	0.82722	1	17758	0	-0.49576
ALS2	6	0.013231	0.040047	0.905507	954	3	-0.97443	0.43232	0.49905	1	10740	1	-0.97443
NBPF9	5	0.013255	0.040121	0.905507	955	2	0.23845	0.49921	0.54171	1	11682	1	0.23845
NOS2	6	0.013261	0.040136	0.905507	956	1	0.69671	0.027323	0.068332	0.958214	1543	3	0.69671
BBS1	6	0.013263	0.04014	0.905507	957	4	-1.2098	0.88169	0.88148	1	18959	0	-1.2098
hsa-mir-1973	4	0.013295	0.040222	0.905507	958	3	-1.1112	0.48079	0.52952	1	11405	1	-1.1112
PIGY	6	0.0133	0.040232	0.905507	959	2	0.023197	0.82286	0.82275	1	17657	0	0.023197
FAM102B	6	0.013307	0.040256	0.905507	960	3	-0.70627	0.50116	0.54301	1	11710	1	-0.70627
KLRG1	6	0.013323	0.040301	0.905507	961	4	-0.7034	0.14717	0.24531	0.993117	5346	2	-0.7034
SGK110	6	0.013348	0.040373	0.905507	962	4	-0.79076	0.95742	0.95736	1	20576	0	-0.79076
PHACTR3	6	0.013357	0.040396	0.905507	963	4	-0.97944	0.35004	0.45158	1	9696	1	-0.97944
HOPX	6	0.01336	0.040405	0.905507	964	1	0.025825	0.53977	0.56952	1	12240	1	0.025825
POLR2F	6	0.013369	0.040424	0.905507	965	3	-0.38775	0.98039	0.98023	1	21126	0	-0.38775
SERINC4	6	0.013386	0.040469	0.905507	966	3	-0.56946	0.62855	0.63728	1	13682	1	-0.56946
ACSM2A	6	0.013389	0.040478	0.905507	967	4	-0.66077	0.71119	0.71116	1	15252	1	-0.66077
C7orf25	6	0.013396	0.040498	0.905507	968	3	-0.022353	0.2309	0.33673	0.999807	7296	2	-0.022353
FAM134A	6	0.013402	0.040516	0.905507	969	4	-0.86693	0.1238	0.21884	0.992328	4754	1	-0.86693
hsa-mir-219a-1	4	0.013412	0.040546	0.905507	970	3	-0.81226	0.74337	0.74317	1	15935	0	-0.81226
hsa-mir-4498	4	0.013433	0.040602	0.905828	971	2	-0.79837	0.27037	0.37969	1	8206	1	-0.79837
TMEM182	6	0.013468	0.040697	0.906179	972	4	-0.46663	0.99827	0.99827	1	21571	0	-0.46663
IL9R_X	6	0.013472	0.040708	0.906179	973	2	0.14267	0.19847	0.30163	0.994216	6571	2	0.14267
NonTargetingControlGuideForHuman_0463	1	0.01349	0.04075	0.906179	974	1	-1.5508	0.98651	0.98638	1	21265	0	-1.5508
ELL	6	0.013509	0.040801	0.906179	975	3	-1.8921	0.46183	0.51733	1	11145	1	-1.8921
SNRPB	6	0.013519	0.040827	0.906179	976	4	-0.57449	0.98423	0.98412	1	21208	0	-0.57449
POU6F2	6	0.013559	0.04094	0.906999	977	2	0.31467	0.15058	0.24918	0.993117	5428	2	0.31467
MIER3	6	0.013562	0.040947	0.906999	978	2	-0.20932	0.90245	0.9023	1	19407	0	-0.20932
SHC1	6	0.013609	0.041067	0.90731	979	1	-0.25448	0.9813	0.98112	1	21146	0	-0.25448
FEZ1	6	0.013618	0.041093	0.90731	980	4	-0.36466	0.84292	0.8428	1	18085	0	-0.36466
TANGO6	6	0.013618	0.041094	0.90731	981	2	-0.11769	0.95958	0.95952	1	20635	0	-0.11769
OR13D1	6	0.013651	0.041165	0.90731	982	4	-0.58267	0.67663	0.67865	1	14564	1	-0.58267
USH1C	6	0.013653	0.041171	0.90731	983	4	-0.54592	0.8761	0.87596	1	18835	0	-0.54592
ORC1	6	0.013697	0.041304	0.908876	984	4	-0.63017	0.88028	0.88009	1	18930	0	-0.63017
SMYD2	6	0.013704	0.041326	0.908876	985	4	-0.53719	0.99479	0.99476	1	21483	0	-0.53719
TMEM211	6	0.01375	0.041444	0.910555	986	3	-0.38626	0.57295	0.59368	1	12768	1	-0.38626
LCE1A	6	0.013857	0.041725	0.913184	987	2	-0.66034	0.96247	0.96235	1	20705	0	-0.66034
SIGLEC10	5	0.013859	0.041731	0.913184	988	3	-0.5817	0.90901	0.90895	1	19557	0	-0.5817
DPM3	6	0.013877	0.04178	0.913184	989	3	-0.73754	0.86951	0.86949	1	18672	0	-0.73754
DEFB123	6	0.013904	0.041841	0.913184	990	2	0.090316	0.46411	0.51875	1	11172	1	0.090316
PRSS35	6	0.013925	0.041902	0.913184	991	2	0.14475	0.4149	0.48867	1	10526	1	0.14475
CYFIP1	6	0.013953	0.04198	0.913184	992	4	-1.0278	0.98495	0.98483	1	21230	0	-1.0278
BRDT	6	0.013956	0.04199	0.913184	993	2	-0.26591	0.68377	0.68515	1	14708	1	-0.26591
JUND	6	0.013961	0.042002	0.913184	994	4	-0.47639	0.95594	0.9559	1	20536	0	-0.47639
FNDC9	6	0.013981	0.042049	0.913184	995	3	-0.56516	0.46869	0.52175	1	11237	1	-0.56516
CBWD5	3	0.013985	0.042058	0.913184	996	1	-1.4682	0.91536	0.91538	1	19682	0	-1.4682
PLEKHA5	6	0.014006	0.042126	0.913184	997	2	-0.027177	0.38878	0.47333	1	10173	1	-0.027177
hsa-mir-6511a-1	4	0.014009	0.042136	0.913184	998	3	-0.7017	0.94544	0.94555	1	20303	0	-0.7017
MLST8	6	0.01403	0.042202	0.913184	999	2	-0.22575	0.69952	0.69986	1	15047	1	-0.22575
SMYD5	6	0.014035	0.042217	0.913184	1000	4	-0.59221	0.24237	0.34917	0.999833	7564	1	-0.59221
S100A9	6	0.014047	0.042246	0.913184	1001	3	-0.50325	0.081116	0.16635	0.982775	3666	1	-0.50325
CASP14	6	0.014053	0.042268	0.913184	1002	3	-0.51362	0.98437	0.98425	1	21215	0	-0.51362
hsa-mir-511	4	0.014072	0.042322	0.913184	1003	3	-0.61216	0.71305	0.71295	1	15290	0	-0.61216
ZNF134	6	0.014073	0.042323	0.913184	1004	2	-0.39794	0.59171	0.60797	1	13062	1	-0.39794
TXNDC17	6	0.014108	0.04242	0.913319	1005	3	-0.46645	0.98555	0.98544	1	21245	0	-0.46645
FLOT1	6	0.014118	0.042451	0.913319	1006	3	-0.49281	0.12425	0.21936	0.992328	4764	1	-0.49281
ARPC3	6	0.014136	0.042503	0.913319	1007	3	-1.1467	0.83201	0.83186	1	17849	0	-1.1467
MEIS2	6	0.014155	0.042545	0.913319	1008	3	-0.36185	0.93684	0.93693	1	20131	0	-0.36185
FAM228A	6	0.014169	0.042578	0.913319	1009	3	-0.36441	0.87133	0.87125	1	18716	0	-0.36441
SRD5A2	6	0.014204	0.042665	0.913319	1010	1	0.8169	0.030268	0.073873	0.96338	1652	3	0.8169
hsa-mir-6825	4	0.014216	0.042695	0.913319	1011	2	-0.66036	0.59583	0.61111	1	13117	0	-0.66036
WNT9B	6	0.014228	0.042725	0.913319	1012	4	-0.60903	0.95799	0.95794	1	20591	0	-0.60903
UNC80	6	0.014235	0.042746	0.913319	1013	4	-0.44124	0.98397	0.98385	1	21203	0	-0.44124
GPRC5B	6	0.014241	0.042768	0.913319	1014	4	-0.913	0.991	0.99092	1	21385	0	-0.913
HORMAD2	6	0.014278	0.042876	0.913319	1015	3	-0.55564	0.006566	0.020878	0.915126	480	2	-0.55564
EEF1A1	6	0.014285	0.042892	0.913319	1016	2	0.075042	0.88687	0.88662	1	19074	0	0.075042
PTPN23	6	0.01431	0.042964	0.913319	1017	4	-1.1528	0.99847	0.99847	1	21579	0	-1.1528
FTSJ1	6	0.014345	0.043058	0.913319	1018	3	-0.27689	0.8894	0.88923	1	19117	0	-0.27689
COPE	6	0.014349	0.043073	0.913319	1019	2	-1.1794	0.56333	0.58649	1	12611	1	-1.1794
RPRD2	6	0.014353	0.043083	0.913319	1020	2	-0.17602	0.46753	0.521	1	11220	1	-0.17602
SLC33A1	6	0.014358	0.043098	0.913319	1021	3	-0.58373	0.024335	0.06268	0.949206	1430	1	-0.58373
ZNF662	6	0.014403	0.04321	0.913319	1022	1	-0.25289	0.86245	0.86243	1	18527	0	-0.25289
DSG1	6	0.014406	0.043215	0.913319	1023	2	0.247	0.80801	0.80787	1	17333	0	0.247
TBC1D3	6	0.01442	0.043251	0.913319	1024	4	-0.25395	0.68558	0.68679	1	14757	1	-0.25395
hsa-mir-372	4	0.014432	0.043288	0.913319	1025	3	-0.62693	0.86931	0.86929	1	18669	0	-0.62693
TMEM102	6	0.014453	0.043345	0.913319	1026	3	-0.20655	0.23906	0.3455	0.999833	7481	1	-0.20655
PFN1	6	0.01447	0.043389	0.913319	1027	2	-0.30788	0.35584	0.45472	1	9765	1	-0.30788
TCEAL5	6	0.014506	0.04348	0.913319	1028	2	-0.036711	0.8977	0.89753	1	19301	0	-0.036711
CLTC	6	0.014513	0.043497	0.913319	1029	2	-0.34751	0.68498	0.68624	1	14741	1	-0.34751
GPR27	6	0.014519	0.043514	0.913319	1030	4	-0.84992	0.99795	0.99793	1	21564	0	-0.84992
OXSR1	6	0.014528	0.043538	0.913319	1031	4	-0.32498	0.45071	0.51036	1	10982	1	-0.32498
PDS5A	6	0.014531	0.043547	0.913319	1032	4	-0.80612	0.36574	0.46025	1	9875	1	-0.80612
CDK13	6	0.014549	0.043595	0.913319	1033	4	-0.84801	0.98926	0.9892	1	21347	0	-0.84801
PRDX5	6	0.014601	0.04374	0.913319	1034	2	0.16788	0.18389	0.28588	0.993689	6225	2	0.16788
POLR2E	6	0.014649	0.043862	0.913319	1035	3	-0.6121	0.9919	0.99183	1	21409	0	-0.6121
MAMSTR	6	0.014653	0.043868	0.913319	1036	4	-0.71907	0.98195	0.98177	1	21166	0	-0.71907
C16orf45	6	0.014671	0.04391	0.913319	1037	2	-0.23958	0.97941	0.97924	1	21100	0	-0.23958
BCL2L2-PABPN1	6	0.014685	0.043947	0.913319	1038	4	-0.43304	0.82196	0.82188	1	17642	0	-0.43304
SUV420H1	6	0.014714	0.044023	0.913319	1039	4	-0.47212	0.91	0.90993	1	19579	0	-0.47212
WNT4	6	0.014726	0.044055	0.913319	1040	4	-0.5551	0.31615	0.42985	1	9215	1	-0.5551
PLK5	6	0.014727	0.044056	0.913319	1041	3	-1.1546	0.51591	0.55298	1	11923	1	-1.1546
PISD	6	0.014755	0.044128	0.913319	1042	3	-0.48399	0.50065	0.54266	1	11701	1	-0.48399
GPR17	6	0.014765	0.044157	0.913319	1043	3	-0.6373	0.67092	0.67351	1	14446	1	-0.6373
CENPC	4	0.01477	0.044167	0.913319	1044	3	-0.69202	0.35762	0.4557	1	9784	1	-0.69202
KRTAP9-9	6	0.014772	0.044178	0.913319	1045	3	-0.81665	0.95599	0.95594	1	20540	0	-0.81665
MYOG	6	0.014776	0.044191	0.913319	1046	3	-0.1251	0.21913	0.3239	0.999387	7007	1	-0.1251
USP17L15	6	0.014779	0.044196	0.913319	1047	3	0.24149	0.04645	0.10424	0.965246	2331	3	0.24149
ASTN1	6	0.014796	0.044251	0.913319	1048	4	-0.4109	0.9879	0.98779	1	21302	0	-0.4109
XRCC2	6	0.0148	0.044261	0.913319	1049	3	-0.4119	0.47872	0.52819	1	11372	1	-0.4119
COQ5	6	0.014803	0.044268	0.913319	1050	4	-0.68248	0.52072	0.55625	1	11989	1	-0.68248
PRSS36	6	0.014851	0.044388	0.914909	1051	3	-0.51215	0.29509	0.40655	1	8756	2	-0.51215
ABCB7	6	0.014901	0.044518	0.915288	1052	2	-0.11474	0.9594	0.95933	1	20624	0	-0.11474
TMEM154	6	0.014915	0.044556	0.915288	1053	4	-0.95884	0.11307	0.20681	0.992024	4514	2	-0.95884
GLIS2	6	0.01492	0.04457	0.915288	1054	3	-0.29035	0.75714	0.75696	1	16224	0	-0.29035
EME2	6	0.014924	0.044575	0.915288	1055	3	-0.34014	0.98939	0.98933	1	21351	0	-0.34014
ABCC10	6	0.014981	0.044727	0.916585	1056	2	0.61173	0.012216	0.036712	0.915126	848	3	0.61173
C10orf114	6	0.015003	0.044785	0.916585	1057	2	-0.26805	0.95078	0.9508	1	20418	0	-0.26805
RNASE9	6	0.015005	0.04479	0.916585	1058	4	-0.49311	0.9935	0.99345	1	21456	0	-0.49311
CCDC127	6	0.015025	0.044844	0.916585	1059	3	-0.44512	0.92184	0.92191	1	19822	0	-0.44512
TBP	6	0.015048	0.044909	0.916585	1060	3	-0.59959	0.092756	0.18381	0.988043	4027	1	-0.59959
HRSP12	6	0.015048	0.044909	0.916585	1061	3	-0.32891	0.26834	0.37752	1	8162	1	-0.32891
FOXR2	6	0.015072	0.044971	0.916585	1062	3	-0.47638	0.95719	0.95712	1	20570	0	-0.47638
TCOF1	6	0.015097	0.045026	0.916585	1063	3	-0.61506	0.85578	0.85575	1	18388	0	-0.61506
ABCB4	6	0.015108	0.045052	0.916585	1064	3	-0.19541	0.25457	0.36243	0.999909	7843	1	-0.19541
ZDHHC24	6	0.015111	0.045061	0.916585	1065	4	-0.55059	0.77612	0.77593	1	16632	0	-0.55059
TAS2R42	6	0.015147	0.045142	0.916633	1066	1	0.23239	0.29074	0.40184	1	8668	2	0.23239
WDR12	6	0.015169	0.0452	0.916633	1067	4	-0.90037	0.95616	0.95612	1	20543	0	-0.90037
ZNF77	6	0.015188	0.045246	0.916633	1068	4	-0.58323	0.88361	0.88336	1	19004	0	-0.58323
INPP5J	6	0.01519	0.045256	0.916633	1069	3	-0.34235	0.032914	0.078942	0.96338	1765	1	-0.34235
GDF15	6	0.015197	0.045275	0.916633	1070	2	-0.62752	0.8843	0.88403	1	19018	0	-0.62752
DIS3L2	6	0.01524	0.045389	0.91762	1071	3	-0.30922	0.89337	0.89321	1	19206	0	-0.30922
SAMD7	6	0.015246	0.045409	0.91762	1072	1	0.089822	0.50071	0.5427	1	11703	1	0.089822
UBB	6	0.01528	0.045502	0.917711	1073	2	-0.0054739	0.87134	0.87126	1	18717	0	-0.0054739
MAP1LC3C	6	0.015294	0.045533	0.917711	1074	2	-0.29367	0.84225	0.84213	1	18068	0	-0.29367
hsa-mir-874	4	0.015297	0.04554	0.917711	1075	1	0.29217	0.71994	0.71983	1	15458	0	0.29217
SKIV2L	6	0.015345	0.045671	0.918647	1076	1	0.32839	0.72775	0.72763	1	15620	0	0.32839
hsa-mir-2278	4	0.01535	0.045682	0.918647	1077	2	-0.29168	0.65622	0.66069	1	14179	0	-0.29168
GPALPP1	6	0.015362	0.045714	0.918647	1078	3	-0.37645	0.98248	0.98229	1	21174	0	-0.37645
NUDC	6	0.015391	0.045787	0.919255	1079	3	-0.72104	0.19888	0.30209	0.994216	6577	1	-0.72104
hsa-mir-378b	4	0.015435	0.045903	0.920258	1080	2	-0.2681	0.6704	0.67303	1	14434	0	-0.2681
hsa-mir-4670	4	0.01546	0.045965	0.920258	1081	3	-0.60937	0.95337	0.95333	1	20475	0	-0.60937
C9orf116	6	0.015463	0.045977	0.920258	1082	4	-0.58222	0.89652	0.89635	1	19276	0	-0.58222
PTK6	6	0.015485	0.046032	0.920258	1083	4	-0.63982	0.79259	0.79244	1	16992	0	-0.63982
MTHFD1	6	0.015491	0.046049	0.920258	1084	3	-0.47623	0.46441	0.51895	1	11177	1	-0.47623
OR6C76	6	0.015544	0.046187	0.922175	1085	1	0.10965	0.33895	0.44554	1	9545	1	0.10965
RPL7A	6	0.015593	0.046324	0.92275	1086	3	-0.80967	0.56659	0.58891	1	12664	1	-0.80967
LSM3	6	0.015603	0.046354	0.92275	1087	2	-0.24298	0.80904	0.80888	1	17357	0	-0.24298
KANSL3	6	0.015625	0.046407	0.92275	1088	2	-0.21372	0.80571	0.80554	1	17285	0	-0.21372
LYZL1	6	0.015652	0.046471	0.92275	1089	4	-0.37587	0.9364	0.93649	1	20124	0	-0.37587
GADD45B	6	0.015655	0.046477	0.92275	1090	4	-0.59527	0.20251	0.30601	0.995192	6657	1	-0.59527
ZC3H12A	6	0.015657	0.046481	0.92275	1091	4	-0.50518	0.62259	0.63238	1	13590	1	-0.50518
TMEM205	6	0.015672	0.046524	0.92275	1092	4	-0.37475	0.60544	0.61859	1	13275	1	-0.37475
SLC5A10	6	0.015692	0.046581	0.92275	1093	2	-0.28165	0.55141	0.57785	1	12423	1	-0.28165
EBF4	6	0.015709	0.046615	0.92275	1094	3	-0.41428	0.78325	0.78309	1	16801	0	-0.41428
hsa-mir-3659	4	0.015725	0.046655	0.92275	1095	3	-0.61153	0.84213	0.84202	1	18066	0	-0.61153
MRPS23	6	0.015742	0.046698	0.92275	1096	2	0.52249	0.045021	0.10159	0.96338	2278	2	0.52249
PDE6D	6	0.015772	0.046778	0.92275	1097	4	-0.61378	0.17547	0.27679	0.993117	6020	2	-0.61378
BHLHB9	6	0.015786	0.046809	0.92275	1098	3	-0.81207	0.89478	0.8946	1	19243	0	-0.81207
TCP1	6	0.015804	0.046854	0.92275	1099	4	-1.5901	0.59444	0.61002	1	13096	1	-1.5901
BPIFB1	6	0.015804	0.046855	0.92275	1100	3	-0.27595	0.95783	0.95777	1	20583	0	-0.27595
2018-09-10	6	0.015872	0.047041	0.924713	1101	4	-0.77822	0.60182	0.61575	1	13218	1	-0.77822
ANKRD37	6	0.015887	0.047077	0.924713	1102	4	-0.50134	0.93629	0.93638	1	20119	0	-0.50134
GADD45A	6	0.015904	0.047129	0.924713	1103	4	-0.73921	0.99876	0.99874	1	21592	0	-0.73921
AGAP5	2	0.015916	0.047166	0.924713	1104	1	-1.9534	0.92671	0.9268	1	19916	0	-1.9534
CHRM1	6	0.01594	0.047217	0.924713	1105	1	0.34651	0.57724	0.59688	1	12830	1	0.34651
hsa-mir-4746	4	0.015943	0.047224	0.924713	1106	3	-1.6513	0.68991	0.6908	1	14848	0	-1.6513
PALB2	6	0.015953	0.047255	0.924713	1107	4	-0.57572	0.76518	0.76501	1	16393	0	-0.57572
FAM129C	6	0.015973	0.047309	0.924713	1108	3	-0.47792	0.87362	0.8735	1	18776	0	-0.47792
CCL8	6	0.01599	0.047358	0.924713	1109	1	0.34163	0.72152	0.72144	1	15489	0	0.34163
PRICKLE4	6	0.016039	0.047493	0.924713	1110	1	0.0068707	0.25735	0.36546	0.999919	7910	1	0.0068707
PTPLAD2	6	0.016061	0.047545	0.924713	1111	3	-0.61039	0.70565	0.70579	1	15165	1	-0.61039
PLAGL2	6	0.016065	0.047556	0.924713	1112	4	-0.4549	0.98487	0.98474	1	21228	0	-0.4549
DCLRE1A	6	0.016068	0.047565	0.924713	1113	3	-0.53754	0.84	0.83991	1	18022	0	-0.53754
PORCN	6	0.016089	0.047617	0.924713	1114	3	-0.32765	0.79433	0.79416	1	17036	0	-0.32765
OR4D5	6	0.016102	0.047646	0.924713	1115	3	-0.3466	0.37142	0.46338	1	9966	1	-0.3466
UBA5	6	0.01612	0.047692	0.924713	1116	3	-0.87698	0.49905	0.5416	1	11680	1	-0.87698
TBC1D25	6	0.016138	0.047733	0.924713	1117	2	0.47166	0.22419	0.32941	0.999387	7126	2	0.47166
ZNF467	6	0.016188	0.047853	0.924713	1118	2	-0.34425	0.61856	0.62909	1	13524	1	-0.34425
PAN2	6	0.016199	0.047883	0.924713	1119	4	-0.33936	0.65539	0.65996	1	14156	1	-0.33936
MED7	6	0.016237	0.047977	0.924713	1120	2	-0.20722	0.02657	0.066929	0.953226	1515	2	-0.20722
GPATCH4	6	0.016242	0.047988	0.924713	1121	3	-0.38677	0.25978	0.36816	0.999919	7974	1	-0.38677
INO80	6	0.016252	0.048012	0.924713	1122	2	0.26197	0.77444	0.77426	1	16586	0	0.26197
hsa-mir-497	4	0.01627	0.048066	0.924713	1123	3	-0.64296	0.99633	0.9963	1	21523	0	-0.64296
EFCC1	6	0.016287	0.048111	0.924713	1124	1	-0.3344	0.0028344	0.0098953	0.913746	233	2	-0.3344
NR0B2	6	0.016321	0.048195	0.924713	1125	3	-0.29219	0.83681	0.83669	1	17955	0	-0.29219
SAE1	6	0.016327	0.048217	0.924713	1126	2	-0.33317	0.62011	0.6304	1	13549	1	-0.33317
hsa-mir-3690-1	4	0.016333	0.048234	0.924713	1127	2	-0.42592	0.90164	0.90149	1	19387	0	-0.42592
FFAR2	6	0.016337	0.04824	0.924713	1128	1	0.26932	0.43504	0.50068	1	10773	1	0.26932
RECQL	6	0.016342	0.048256	0.924713	1129	2	0.35353	0.21367	0.31809	0.999387	6893	2	0.35353
hsa-mir-1273f	4	0.016347	0.048266	0.924713	1130	3	-0.66086	0.56177	0.58538	1	12579	1	-0.66086
MFAP3	6	0.016365	0.048315	0.924713	1131	3	-0.2692	0.18056	0.2823	0.993117	6140	2	-0.2692
FBXO38	6	0.016373	0.048337	0.924713	1132	2	0.012449	0.69262	0.69338	1	14900	1	0.012449
CD48	6	0.016412	0.048441	0.924713	1133	4	-0.46265	0.94149	0.94156	1	20231	0	-0.46265
NARS	6	0.016429	0.048477	0.924713	1134	4	-0.61647	0.85692	0.85688	1	18422	0	-0.61647
ANAPC13	6	0.016459	0.04855	0.924713	1135	3	-0.78638	0.79171	0.79156	1	16967	0	-0.78638
GPR39	6	0.016462	0.048556	0.924713	1136	4	-0.5181	0.86894	0.86894	1	18663	0	-0.5181
TBCB	6	0.016463	0.048558	0.924713	1137	2	-0.13641	0.11866	0.21309	0.992328	4627	1	-0.13641
FAM53C	6	0.016486	0.048616	0.924713	1138	2	0.03814	0.46509	0.51941	1	11188	1	0.03814
KLHL25	6	0.016494	0.048643	0.924713	1139	2	-0.1089	0.9016	0.90144	1	19384	0	-0.1089
ARHGAP21	6	0.016501	0.048662	0.924713	1140	2	-0.38243	0.13521	0.23168	0.992328	5022	1	-0.38243
ATP5B	6	0.01653	0.048739	0.924802	1141	4	-0.5548	0.98794	0.98783	1	21303	0	-0.5548
LAX1	6	0.016535	0.048752	0.924802	1142	1	0.11655	0.012814	0.038367	0.915126	893	2	0.11655
SUGP2	6	0.016577	0.048853	0.924815	1143	3	-0.57805	0.056507	0.12254	0.972434	2729	1	-0.57805
hsa-mir-5693	3	0.0166	0.048919	0.924815	1144	2	-1.7523	0.79368	0.79353	1	17019	0	-1.7523
CNNM3	6	0.016607	0.048942	0.924815	1145	2	-0.12651	0.97976	0.97959	1	21108	0	-0.12651
C2orf72	6	0.016609	0.048946	0.924815	1146	3	-0.55043	0.9556	0.95554	1	20525	0	-0.55043
SLC35E1	6	0.016634	0.049006	0.924815	1147	1	0.79343	0.20023	0.30354	0.994445	6611	2	0.79343
ETF1	6	0.016635	0.049009	0.924815	1148	3	-0.45949	0.856	0.85596	1	18399	0	-0.45949
CHCHD2	6	0.016662	0.049087	0.925484	1149	4	-0.70104	0.93444	0.93452	1	20073	0	-0.70104
LRRC10	6	0.01668	0.049132	0.925523	1150	4	-0.9926	0.99885	0.99884	1	21597	0	-0.9926
DDX20	6	0.016719	0.049241	0.926417	1151	3	-1.5557	0.66831	0.67121	1	14397	1	-1.5557
IPO11	6	0.016728	0.049265	0.926417	1152	4	-0.83827	0.50957	0.5487	1	11824	1	-0.83827
hsa-mir-4779	4	0.016752	0.049328	0.926643	1153	3	-1.1836	0.28467	0.39523	1	8528	1	-1.1836
DOLK	6	0.016779	0.049396	0.926643	1154	4	-0.83654	0.99829	0.99828	1	21572	0	-0.83654
CD274	6	0.016782	0.049407	0.926643	1155	1	0.72727	0.044698	0.101	0.96338	2263	3	0.72727
OR7A17	6	0.016799	0.049451	0.926643	1156	4	-0.75135	0.24046	0.34706	0.999833	7510	1	-0.75135
POTEG	4	0.016819	0.049505	0.926643	1157	1	0.33782	0.74786	0.74766	1	16035	0	0.33782
BAMBI	6	0.016838	0.04956	0.926643	1158	4	-0.62357	0.98069	0.98052	1	21133	0	-0.62357
hsa-mir-6756	4	0.01685	0.04959	0.926643	1159	3	-0.95789	0.74467	0.74443	1	15968	0	-0.95789
CHCHD5	6	0.016863	0.049619	0.926643	1160	4	-0.87252	0.99743	0.9974	1	21550	0	-0.87252
PPIA	6	0.016882	0.049677	0.92687	1161	3	-0.76843	0.66017	0.6641	1	14250	1	-0.76843
MPHOSPH8	6	0.016901	0.049729	0.92687	1162	3	-0.51236	0.33742	0.44471	1	9525	1	-0.51236
OR11L1	6	0.016927	0.049794	0.92687	1163	3	-0.36871	0.95797	0.95792	1	20589	0	-0.36871
ZNF436	6	0.01693	0.049803	0.92687	1164	4	-0.92852	0.67788	0.67979	1	14586	1	-0.92852
SLC46A3	6	0.01698	0.049938	0.927671	1165	2	0.1199	0.072517	0.15136	0.979789	3339	1	0.1199
FAM126A	6	0.016989	0.049962	0.927671	1166	2	-0.45373	0.59777	0.61262	1	13155	1	-0.45373
MARK3	6	0.016999	0.049991	0.927671	1167	4	-0.53411	0.94967	0.94968	1	20400	0	-0.53411
C1orf52	6	0.017011	0.050017	0.927671	1168	3	-1.0809	0.7845	0.78436	1	16824	0	-1.0809
SLC51B	6	0.017064	0.050151	0.928414	1169	4	-0.39115	0.91738	0.91745	1	19737	0	-0.39115
HMP19	6	0.017074	0.050176	0.928414	1170	4	-0.58157	0.17269	0.27377	0.993117	5946	2	-0.58157
CD2BP2	6	0.017079	0.050186	0.928414	1171	4	-0.64865	0.99845	0.99845	1	21578	0	-0.64865
TMC3	6	0.01711	0.05026	0.928999	1172	4	-0.65576	0.80336	0.80319	1	17241	0	-0.65576
HMGXB3	6	0.017178	0.05043	0.930387	1173	1	0.37671	0.40425	0.48235	1	10388	1	0.37671
DNAI1	6	0.017189	0.050454	0.930387	1174	3	-0.33955	0.80585	0.80567	1	17291	0	-0.33955
RIOK3	6	0.017196	0.050473	0.930387	1175	4	-0.46879	0.075438	0.15646	0.979789	3456	1	-0.46879
LMF1	6	0.017228	0.050568	0.930387	1176	1	0.098632	0.22183	0.32683	0.999387	7073	2	0.098632
PTP4A1	6	0.017253	0.050632	0.930387	1177	3	-1.0201	0.74397	0.74374	1	15950	0	-1.0201
EPS8L1	6	0.017256	0.050645	0.930387	1178	4	-0.50962	0.29806	0.40976	1	8826	1	-0.50962
KDM5A	6	0.017259	0.050651	0.930387	1179	2	-0.28332	0.22133	0.32629	0.999387	7058	1	-0.28332
HPGDS	6	0.017279	0.050706	0.930387	1180	4	-0.97383	0.99376	0.9937	1	21464	0	-0.97383
hsa-mir-708	4	0.017284	0.050722	0.930387	1181	3	-1.2267	0.81864	0.81853	1	17567	0	-1.2267
GPATCH2L	6	0.017327	0.050836	0.93085	1182	1	0.02642	0.321	0.43527	1	9329	1	0.02642
NPIPA5	2	0.017344	0.050875	0.93085	1183	2	-1.7919	0.98266	0.98247	1	21178	0	-1.7919
ARG2	6	0.017376	0.050954	0.93085	1184	1	0.37239	0.54156	0.57083	1	12264	1	0.37239
ADAM18	6	0.017398	0.051017	0.93085	1185	2	-0.017252	0.3273	0.43921	1	9403	1	-0.017252
RPF2	5	0.017406	0.051033	0.93085	1186	2	0.63125	0.33814	0.44509	1	9534	1	0.63125
C11orf48	6	0.017426	0.051091	0.93085	1187	3	-0.49767	0.43703	0.50192	1	10798	1	-0.49767
UFSP1	6	0.017462	0.051191	0.93085	1188	4	-0.46227	0.81418	0.81406	1	17470	0	-0.46227
AEBP1	6	0.017475	0.051222	0.93085	1189	1	0.17813	0.39211	0.47524	1	10216	1	0.17813
hsa-mir-3670-1	4	0.01748	0.051236	0.93085	1190	2	-1.4341	0.87136	0.87128	1	18718	0	-1.4341
SEMA3A	6	0.017504	0.051297	0.93085	1191	4	-0.503	0.81244	0.81229	1	17427	0	-0.503
GSG1L	6	0.017525	0.05135	0.93085	1192	2	0.096638	0.20397	0.30759	0.995798	6690	2	0.096638
FAM21A	6	0.017538	0.051385	0.93085	1193	4	-0.75892	0.74903	0.74885	1	16065	0	-0.75892
DENND4A	6	0.017574	0.051487	0.93085	1194	2	-0.19612	0.79923	0.79904	1	17148	0	-0.19612
RCC1	6	0.017606	0.051572	0.93085	1195	4	-0.93462	0.99779	0.99776	1	21562	0	-0.93462
PDZD9	6	0.017608	0.051575	0.93085	1196	2	-0.3355	0.99099	0.99091	1	21384	0	-0.3355
MAGEB18	6	0.017614	0.051593	0.93085	1197	3	-0.52058	0.89773	0.89756	1	19302	0	-0.52058
CALR3	6	0.017647	0.051678	0.93085	1198	2	-0.087073	0.15774	0.2574	0.993117	5611	1	-0.087073
CXCL9	6	0.017673	0.051751	0.93085	1199	1	0.11755	0.57907	0.59827	1	12859	1	0.11755
FNDC3A	6	0.017678	0.051768	0.93085	1200	2	0.0079758	0.8005	0.80032	1	17174	0	0.0079758
GNAT3	6	0.017707	0.051853	0.93085	1201	4	-0.42933	0.83305	0.83291	1	17874	0	-0.42933
OR9I1	6	0.017717	0.051881	0.93085	1202	2	-0.0020079	0.30624	0.41878	1	8997	1	-0.0020079
ACTRT3	6	0.017723	0.051897	0.93085	1203	1	0.078541	0.037907	0.088322	0.96338	1976	2	0.078541
LRRC48	6	0.017752	0.051971	0.93085	1204	4	-0.61727	0.19997	0.30324	0.994375	6604	1	-0.61727
NDST1	6	0.01776	0.051992	0.93085	1205	4	-0.41012	0.17641	0.27781	0.993117	6035	1	-0.41012
BCAS2	6	0.017772	0.052023	0.93085	1206	2	-0.12511	0.025319	0.064595	0.953226	1460	1	-0.12511
ABHD15	6	0.017808	0.052117	0.93085	1207	4	-0.4718	0.79252	0.79237	1	16991	0	-0.4718
YARS	6	0.017811	0.052126	0.93085	1208	4	-0.87993	0.61295	0.62455	1	13408	1	-0.87993
NonTargetingControlGuideForHuman_0179	1	0.017826	0.052163	0.93085	1209	1	-1.2874	0.98217	0.98199	1	21169	0	-1.2874
ZNF410	6	0.017843	0.052212	0.93085	1210	3	-0.1682	0.7739	0.77372	1	16571	0	-0.1682
LRCH3	6	0.017851	0.052233	0.93085	1211	3	-0.66678	0.97182	0.97169	1	20922	0	-0.66678
MED4	6	0.017853	0.052235	0.93085	1212	3	-0.30261	0.40447	0.48248	1	10390	1	-0.30261
GABRA2	6	0.017871	0.052286	0.93085	1213	3	-1.0705	0.28452	0.39508	1	8521	1	-1.0705
DYNLL2	6	0.01788	0.052307	0.93085	1214	4	-0.31174	0.95896	0.95891	1	20616	0	-0.31174
RPLP1	6	0.017896	0.052334	0.93085	1215	3	-0.12024	0.74368	0.74347	1	15943	0	-0.12024
SLC40A1	6	0.017898	0.052339	0.93085	1216	2	-0.50443	0.77857	0.77841	1	16692	0	-0.50443
NPFF	6	0.017935	0.052442	0.93085	1217	3	-0.80359	0.9578	0.95774	1	20582	0	-0.80359
EDIL3	6	0.017952	0.052486	0.93085	1218	4	-0.62487	0.0018817	0.0070927	0.87035	170	2	-0.62487
TRMT5	6	0.017992	0.052604	0.93085	1219	3	-0.43545	0.2206	0.32549	0.999387	7044	1	-0.43545
TAS2R9	6	0.018	0.052625	0.93085	1220	2	-0.19265	0.74483	0.74459	1	15971	0	-0.19265
TMEM48	4	0.018001	0.052626	0.93085	1221	3	-0.74316	0.98275	0.98257	1	21179	0	-0.74316
C8orf58	6	0.018006	0.052642	0.93085	1222	4	-0.62328	0.34543	0.44906	1	9636	1	-0.62328
FAM83D	6	0.01802	0.052674	0.93085	1223	1	-0.15821	0.73595	0.73573	1	15768	0	-0.15821
STRIP2	6	0.018025	0.052687	0.93085	1224	4	-0.52813	0.92946	0.92953	1	19978	0	-0.52813
WDR75	6	0.01803	0.052702	0.93085	1225	3	-1.1024	0.67403	0.67632	1	14510	1	-1.1024
SDHC	6	0.018032	0.05271	0.93085	1226	4	-0.44903	0.96732	0.96725	1	20814	0	-0.44903
CCT4	6	0.018038	0.052724	0.93085	1227	3	-0.54201	0.70162	0.70187	1	15082	1	-0.54201
LIX1	6	0.018076	0.052814	0.931124	1228	4	-0.58178	0.40274	0.48146	1	10371	1	-0.58178
ACSM4	6	0.018079	0.052825	0.931124	1229	3	-0.73135	0.98631	0.98618	1	21262	0	-0.73135
CCNY	6	0.018137	0.052976	0.933023	1230	4	-0.60818	0.99669	0.99664	1	21533	0	-0.60818
BRCC3	6	0.018205	0.053143	0.934224	1231	4	-0.80006	0.96622	0.96616	1	20790	0	-0.80006
MUC17	6	0.018224	0.053192	0.934224	1232	4	-0.49488	0.88357	0.88331	1	19003	0	-0.49488
ANKRD62	6	0.018245	0.053244	0.934224	1233	3	-0.69772	0.86866	0.86867	1	18655	0	-0.69772
NTN3	6	0.018264	0.053305	0.934224	1234	3	-0.48006	0.73022	0.73004	1	15671	0	-0.48006
RPN1	6	0.018267	0.053311	0.934224	1235	3	-0.35439	0.96976	0.96962	1	20877	0	-0.35439
CHST9	6	0.018316	0.05344	0.934224	1236	4	-0.75929	0.96958	0.96946	1	20872	0	-0.75929
TNFRSF10B	6	0.018317	0.053442	0.934224	1237	2	-0.28028	0.48047	0.52932	1	11400	1	-0.28028
CLDN10	6	0.018335	0.053492	0.934224	1238	4	-0.4281	0.93266	0.93274	1	20042	0	-0.4281
PRPF3	6	0.01834	0.053508	0.934224	1239	3	-0.39059	0.79512	0.79492	1	17055	0	-0.39059
FBXO40	6	0.018362	0.053571	0.934224	1240	4	-0.32446	0.70507	0.7052	1	15155	1	-0.32446
PACSIN2	6	0.01838	0.053615	0.934224	1241	3	-0.92347	0.8524	0.85239	1	18300	0	-0.92347
SMG8	6	0.018388	0.053632	0.934224	1242	3	-0.40323	0.65179	0.65683	1	14095	1	-0.40323
hsa-mir-383	4	0.018434	0.053758	0.934224	1243	3	-0.55099	0.97549	0.97536	1	21004	0	-0.55099
TIFA	6	0.018444	0.053782	0.934224	1244	2	-0.057876	0.82625	0.82613	1	17738	0	-0.057876
CDHR2	6	0.018465	0.053843	0.934224	1245	3	-0.15232	0.7637	0.76353	1	16364	0	-0.15232
MAP2	6	0.018473	0.053868	0.934224	1246	3	-0.78923	0.47541	0.5261	1	11331	1	-0.78923
AXIN1	6	0.018477	0.053878	0.934224	1247	4	-0.7351	0.96168	0.96156	1	20684	0	-0.7351
PIP4K2A	6	0.018501	0.05394	0.934224	1248	4	-0.55749	0.94982	0.94983	1	20401	0	-0.55749
ZGLP1	6	0.018509	0.05396	0.934224	1249	4	-0.39661	0.90069	0.90052	1	19358	0	-0.39661
SECISBP2	6	0.018515	0.053974	0.934224	1250	2	-0.10976	0.9376	0.93764	1	20144	0	-0.10976
PLEKHG4	6	0.018523	0.053989	0.934224	1251	3	-0.13707	0.069211	0.14551	0.977122	3222	1	-0.13707
HSPE1	6	0.018525	0.053993	0.934224	1252	4	-0.57836	0.90633	0.90623	1	19510	0	-0.57836
LAS1L	6	0.018547	0.054051	0.934482	1253	4	-1.1098	0.19525	0.29818	0.994216	6484	1	-1.1098
TRUB1	6	0.018579	0.05414	0.934549	1254	2	0.84566	0.013512	0.040254	0.915126	942	3	0.84566
PPWD1	6	0.018611	0.054223	0.934549	1255	3	-0.55936	0.3408	0.44653	1	9570	1	-0.55936
TMEM101	6	0.018613	0.054227	0.934549	1256	4	-0.62999	0.99727	0.99725	1	21545	0	-0.62999
SPRY1	6	0.018613	0.054227	0.934549	1257	1	0.051712	0.10166	0.19398	0.989814	4237	1	0.051712
KIF18A	6	0.018649	0.054314	0.935293	1258	4	-0.52488	0.038649	0.089681	0.96338	2008	2	-0.52488
PNKP	6	0.018694	0.054443	0.935397	1259	3	-0.6371	0.61905	0.62951	1	13536	1	-0.6371
ASPHD2	6	0.018695	0.054444	0.935397	1260	4	-0.76442	0.74814	0.74795	1	16042	0	-0.76442
TPT1	6	0.018712	0.054493	0.935397	1261	2	-0.57524	0.98109	0.98092	1	21142	0	-0.57524
PTDSS1	6	0.018717	0.054504	0.935397	1262	4	-0.47578	0.29573	0.40723	1	8772	2	-0.47578
GTF3C2	6	0.018731	0.054542	0.935397	1263	4	-1.5796	0.31439	0.42789	1	9180	1	-1.5796
hsa-mir-5590	2	0.018742	0.054579	0.935397	1264	2	-0.97716	0.98126	0.98108	1	21145	0	-0.97716
PTPRCAP	6	0.018762	0.054629	0.935518	1265	2	-0.39065	0.27316	0.38275	1	8282	1	-0.39065
NCMAP	6	0.018789	0.054686	0.935757	1266	4	-0.39285	0.78255	0.78238	1	16782	0	-0.39285
EMX1	6	0.018884	0.054914	0.938918	1267	4	-0.44092	0.055932	0.12147	0.971674	2704	2	-0.44092
NDUFS8	6	0.018911	0.054982	0.939333	1268	4	-1.0222	0.32096	0.43523	1	9326	2	-1.0222
ZNF337	6	0.018959	0.055104	0.940031	1269	3	-0.27785	0.61917	0.62959	1	13538	1	-0.27785
ZNF493	6	0.018966	0.055122	0.940031	1270	3	-0.77934	0.80055	0.80038	1	17176	0	-0.77934
GORAB	6	0.018997	0.055188	0.940031	1271	3	-0.11459	0.18416	0.28616	0.993689	6231	1	-0.11459
CLECL1	6	0.019016	0.055241	0.940031	1272	4	-0.77259	0.98801	0.98791	1	21307	0	-0.77259
HCFC1R1	6	0.019037	0.055304	0.940031	1273	2	-0.18999	0.36701	0.46093	1	9895	1	-0.18999
SSBP4	6	0.019053	0.055344	0.940031	1274	2	-0.13833	0.1848	0.28683	0.993689	6248	2	-0.13833
PKM	6	0.019058	0.055359	0.940031	1275	2	-0.36871	0.99374	0.99368	1	21462	0	-0.36871
BICD1	6	0.019085	0.055425	0.940031	1276	2	0.67504	0.03511	0.083052	0.96338	1856	3	0.67504
C10orf67	6	0.019093	0.055439	0.940031	1277	3	-0.3858	0.9239	0.92398	1	19861	0	-0.3858
PMPCB	6	0.019102	0.055459	0.940031	1278	2	-0.16249	0.083366	0.17028	0.985034	3743	2	-0.16249
KLHL42	6	0.019117	0.055502	0.940031	1279	4	-0.66074	0.87655	0.8764	1	18847	0	-0.66074
PITX3	6	0.019139	0.055552	0.940031	1280	4	-0.50458	0.22487	0.33014	0.999387	7148	1	-0.50458
GPR89B	4	0.019164	0.05562	0.940031	1281	1	0.29695	0.78198	0.78182	1	16762	0	0.29695
RAB23	6	0.019175	0.055659	0.940031	1282	4	-0.51874	0.30776	0.42046	1	9038	1	-0.51874
ZNRD1	6	0.019187	0.055692	0.940031	1283	3	-0.9778	0.98594	0.98583	1	21255	0	-0.9778
LGI3	6	0.019249	0.055849	0.940031	1284	3	-0.39217	0.86326	0.86325	1	18541	0	-0.39217
HBEGF	6	0.019256	0.055868	0.940031	1285	2	0.45241	0.14313	0.24068	0.992328	5251	2	0.45241
BMPR1A	6	0.019259	0.055875	0.940031	1286	4	-0.4179	0.99902	0.99899	1	21602	0	-0.4179
RASSF4	6	0.019276	0.055919	0.940031	1287	4	-0.53558	0.093312	0.18444	0.988043	4042	2	-0.53558
SAMD4B	6	0.019285	0.055939	0.940031	1288	4	-1.1649	0.31222	0.42543	1	9138	1	-1.1649
MEIG1	6	0.019286	0.055941	0.940031	1289	3	-0.4982	0.74645	0.74627	1	16002	0	-0.4982
IMMT	6	0.019305	0.055992	0.940031	1290	3	-0.44698	0.63869	0.64564	1	13862	1	-0.44698
FARSA	6	0.019331	0.056063	0.940031	1291	3	-2.4353	0.92918	0.92926	1	19969	0	-2.4353
UBE3D	6	0.019335	0.056073	0.940031	1292	4	-0.62476	0.75871	0.75852	1	16251	0	-0.62476
CDC16	6	0.019346	0.056108	0.940031	1293	4	-0.94361	0.27366	0.38331	1	8295	1	-0.94361
COX14	6	0.019394	0.056246	0.940169	1294	3	-0.24562	0.89332	0.89315	1	19204	0	-0.24562
VPS41	6	0.01941	0.056288	0.940169	1295	2	0.27783	0.21219	0.31651	0.998581	6861	1	0.27783
FARSB	6	0.019443	0.05637	0.940169	1296	4	-0.63488	0.89068	0.89046	1	19150	0	-0.63488
OR7C2	6	0.019485	0.056473	0.940169	1297	4	-0.49885	0.98629	0.98615	1	21261	0	-0.49885
TRIM64	6	0.01949	0.056488	0.940169	1298	4	-0.53968	0.97714	0.97699	1	21040	0	-0.53968
KCNQ2	6	0.019493	0.056494	0.940169	1299	3	-0.15868	0.84013	0.84004	1	18027	0	-0.15868
ZBTB7B	6	0.019501	0.056514	0.940169	1300	3	-0.69234	0.99372	0.99367	1	21461	0	-0.69234
AADACL3	6	0.019503	0.056518	0.940169	1301	3	-0.29597	0.62185	0.63178	1	13578	1	-0.29597
RPL31	6	0.019522	0.056578	0.940169	1302	3	-0.19744	0.67241	0.67486	1	14474	1	-0.19744
BRIX1	6	0.019567	0.056689	0.940169	1303	4	-1.124	0.32376	0.43729	1	9367	1	-1.124
SYCE1L	6	0.019567	0.056689	0.940169	1304	3	1.4143	0.00070366	0.0029815	0.87035	64	3	1.4143
BCKDK	6	0.019598	0.056769	0.940169	1305	4	-0.40102	0.9998	0.99981	1	21639	0	-0.40102
ST6GALNAC3	6	0.019622	0.056826	0.940169	1306	3	-0.20998	0.51175	0.55017	1	11862	1	-0.20998
MICAL1	6	0.019641	0.05687	0.940169	1307	4	-0.43815	0.18081	0.28256	0.993117	6149	1	-0.43815
AP5Z1	6	0.019672	0.056953	0.940169	1308	4	-0.49316	0.69998	0.70031	1	15054	1	-0.49316
PRR15	6	0.019678	0.056967	0.940169	1309	4	-0.58735	0.98573	0.98562	1	21249	0	-0.58735
SLC9A9	6	0.019717	0.057075	0.940169	1310	3	-0.25421	0.35228	0.4528	1	9718	1	-0.25421
PPIAL4D	3	0.019721	0.057084	0.940169	1311	2	-0.47583	0.9868	0.98667	1	21273	0	-0.47583
C1orf109	6	0.019721	0.057084	0.940169	1312	2	-0.13845	0.72062	0.7205	1	15466	0	-0.13845
DNAJB11	6	0.019723	0.057093	0.940169	1313	4	-0.41114	0.26776	0.37688	1	8145	1	-0.41114
ATP1B4	6	0.019735	0.057123	0.940169	1314	4	-0.43055	0.73689	0.73666	1	15785	0	-0.43055
ARSA	6	0.019737	0.057127	0.940169	1315	2	0.13785	0.17093	0.27193	0.993117	5912	1	0.13785
PCYT2	6	0.019749	0.057156	0.940169	1316	4	-0.69383	0.68414	0.68548	1	14717	1	-0.69383
COX7B	6	0.01975	0.057158	0.940169	1317	3	-0.58016	0.62326	0.63293	1	13598	1	-0.58016
NDC80	6	0.019799	0.05729	0.940958	1318	3	0.1499	0.045393	0.10226	0.96338	2294	3	0.1499
hsa-mir-5088	4	0.019801	0.057292	0.940958	1319	3	-0.94181	0.99137	0.99131	1	21393	0	-0.94181
MTX1	6	0.019829	0.05736	0.941348	1320	4	-0.57794	0.97764	0.9775	1	21052	0	-0.57794
CUL7	6	0.019852	0.057422	0.94144	1321	4	-0.67344	0.78631	0.78617	1	16864	0	-0.67344
SPRR2A	6	0.019898	0.057546	0.94144	1322	1	0.032388	0.88815	0.88797	1	19097	0	0.032388
C22orf15	6	0.01991	0.057573	0.94144	1323	3	-0.39175	0.80698	0.80684	1	17311	0	-0.39175
CCNG2	6	0.019931	0.057627	0.94144	1324	3	-0.40765	0.8438	0.8437	1	18111	0	-0.40765
L3MBTL1	6	0.019943	0.057659	0.94144	1325	3	-0.12276	0.1358	0.23234	0.992328	5041	2	-0.12276
RGR	6	0.019948	0.057674	0.94144	1326	1	0.012054	0.68916	0.6901	1	14829	1	0.012054
MMS22L	6	0.019953	0.057689	0.94144	1327	4	-0.70762	0.75346	0.75332	1	16154	0	-0.70762
SPATA6	6	0.01996	0.057713	0.94144	1328	3	-0.67085	0.18657	0.28873	0.993689	6293	1	-0.67085
ATG14	6	0.020061	0.057976	0.943673	1329	3	-0.65786	0.41032	0.48594	1	10468	1	-0.65786
ZC3H18	6	0.020075	0.058012	0.943673	1330	2	-0.58422	0.70597	0.70611	1	15168	1	-0.58422
TPP2	6	0.020085	0.058044	0.943673	1331	4	-0.62385	0.99496	0.99493	1	21488	0	-0.62385
MADD	6	0.020095	0.058067	0.943673	1332	3	-0.77097	0.95259	0.9526	1	20457	0	-0.77097
GRAP	6	0.020096	0.058067	0.943673	1333	1	-0.061257	0.83367	0.83357	1	17886	0	-0.061257
COG7	6	0.020163	0.058252	0.943881	1334	3	-0.24418	0.3	0.41196	1	8863	1	-0.24418
CLDN9	6	0.020174	0.058282	0.943881	1335	3	-0.46403	0.93249	0.93257	1	20038	0	-0.46403
FBXL6	6	0.020186	0.058317	0.943881	1336	4	-0.52795	0.62203	0.63194	1	13582	1	-0.52795
CALCRL	6	0.020201	0.058353	0.943881	1337	4	-0.53291	0.79644	0.79626	1	17084	0	-0.53291
RASAL2	6	0.020207	0.058367	0.943881	1338	4	-0.56697	0.80729	0.80714	1	17316	0	-0.56697
IL1A	6	0.020222	0.058404	0.943881	1339	3	-0.50474	0.97884	0.97868	1	21081	0	-0.50474
FNTA	6	0.02023	0.058429	0.943881	1340	3	-0.72361	0.96281	0.96268	1	20711	0	-0.72361
WFIKKN1	6	0.020244	0.058459	0.943881	1341	2	0.13469	0.75391	0.75376	1	16161	0	0.13469
ZNF208	6	0.020249	0.058472	0.943881	1342	3	-0.38824	0.98132	0.98114	1	21147	0	-0.38824
DNAJA1	6	0.020276	0.058542	0.944306	1343	4	-0.65831	0.97938	0.97921	1	21099	0	-0.65831
CLDN4	6	0.020343	0.058714	0.945736	1344	1	0.10066	0.062211	0.13295	0.976213	2945	2	0.10066
PMP22	6	0.020343	0.058718	0.945736	1345	4	-0.51388	0.20868	0.31269	0.998581	6779	2	-0.51388
SLC25A15	6	0.020373	0.058798	0.946321	1346	4	-0.71868	0.97464	0.97452	1	20983	0	-0.71868
TMEFF2	6	0.02044	0.058974	0.947781	1347	4	-0.52265	0.90378	0.90365	1	19446	0	-0.52265
KIAA2022	6	0.020441	0.058977	0.947781	1348	1	-0.042009	0.83742	0.83732	1	17968	0	-0.042009
PGS1	6	0.020465	0.059033	0.947989	1349	2	-0.2286	0.91295	0.91295	1	19627	0	-0.2286
GATA4	6	0.020491	0.059096	0.948137	1350	2	-0.3804	0.20604	0.30985	0.996432	6733	2	-0.3804
NUP205	6	0.020532	0.059202	0.948137	1351	3	-0.37696	0.57268	0.59347	1	12765	1	-0.37696
hsa-mir-6828	4	0.020538	0.05922	0.948137	1352	2	-0.57125	0.94941	0.94943	1	20392	0	-0.57125
SLC26A3	6	0.02054	0.059225	0.948137	1353	2	-0.1805	0.16408	0.26454	0.993117	5752	1	-0.1805
NSUN2	6	0.020554	0.059261	0.948137	1354	4	-0.44352	0.9936	0.99356	1	21457	0	-0.44352
TELO2	6	0.020576	0.059314	0.948154	1355	3	-0.48688	0.56398	0.58699	1	12622	1	-0.48688
OTOL1	6	0.020599	0.05937	0.948154	1356	2	0.21577	0.084528	0.1723	0.986029	3784	2	0.21577
MTO1	6	0.020627	0.059442	0.948154	1357	4	-0.80319	0.94458	0.94467	1	20285	0	-0.80319
C7	6	0.020639	0.059471	0.948154	1358	2	-0.1335	0.20918	0.31327	0.998581	6792	1	-0.1335
SPECC1	6	0.020649	0.059493	0.948154	1359	2	-0.17702	0.47559	0.52621	1	11332	1	-0.17702
COLGALT1	6	0.020663	0.059525	0.948154	1360	4	-0.72642	0.79196	0.79183	1	16973	0	-0.72642
SLC25A48	6	0.020688	0.05959	0.948491	1361	2	-0.57211	0.35434	0.45388	1	9742	1	-0.57211
KDM4B	6	0.020737	0.059722	0.949895	1362	2	-0.18582	0.93876	0.93877	1	20163	0	-0.18582
hsa-mir-3658	4	0.02078	0.059846	0.950263	1363	1	0.30779	0.50956	0.5487	1	11823	1	0.30779
IFT52	6	0.020817	0.059948	0.950263	1364	3	0.067391	0.28952	0.40055	1	8634	2	0.067391
DNTT	6	0.020879	0.060101	0.950263	1365	4	-0.53689	0.84722	0.84722	1	18190	0	-0.53689
CSE1L	6	0.020884	0.060111	0.950263	1366	3	-0.46143	0.88355	0.88329	1	19002	0	-0.46143
SPIN4	6	0.020886	0.060116	0.950263	1367	3	-0.30545	0.9754	0.97527	1	21000	0	-0.30545
BMP4	6	0.020898	0.060151	0.950263	1368	3	-0.40962	0.7436	0.74339	1	15941	0	-0.40962
EWSR1	6	0.020909	0.060179	0.950263	1369	3	-0.87428	0.99668	0.99663	1	21531	0	-0.87428
hsa-mir-4509-1	4	0.020922	0.060215	0.950263	1370	3	-1.0845	0.93634	0.93644	1	20122	0	-1.0845
hsa-mir-5589	4	0.020945	0.060278	0.950263	1371	1	0.053909	0.58506	0.60286	1	12962	0	0.053909
FH	6	0.020984	0.060373	0.950263	1372	1	0.17465	0.55989	0.584	1	12550	1	0.17465
CLPSL1	6	0.020985	0.060374	0.950263	1373	2	0.046224	0.55251	0.57866	1	12444	1	0.046224
RCN1	6	0.02101	0.060445	0.950263	1374	2	1.0596	0.053751	0.1175	0.970452	2617	3	1.0596
SSU72	6	0.021012	0.060451	0.950263	1375	4	-0.36465	0.98921	0.98915	1	21346	0	-0.36465
ATP2B2	6	0.021015	0.060458	0.950263	1376	3	-0.26999	0.71251	0.71244	1	15274	1	-0.26999
RPL36AL	6	0.021015	0.060458	0.950263	1377	4	-0.62625	0.91865	0.91873	1	19765	0	-0.62625
hsa-mir-302e	4	0.021044	0.060527	0.950263	1378	1	-0.13783	0.93282	0.9329	1	20044	0	-0.13783
TMEM108	6	0.021083	0.060619	0.950263	1379	3	-0.6937	0.75983	0.75963	1	16279	0	-0.6937
EIF1B	6	0.021086	0.060626	0.950263	1380	4	-0.6619	0.96734	0.96727	1	20815	0	-0.6619
MRPL9	6	0.021093	0.060648	0.950263	1381	3	-0.69431	0.95145	0.95146	1	20431	0	-0.69431
LYG2	6	0.021112	0.060695	0.950263	1382	2	0.19969	0.15062	0.24924	0.993117	5429	2	0.19969
GSC2	6	0.021123	0.06073	0.950263	1383	4	-0.60706	0.81864	0.81853	1	17568	0	-0.60706
GJB2	6	0.021132	0.060753	0.950263	1384	4	-0.55356	0.65127	0.65641	1	14087	1	-0.55356
GCN1L1	6	0.021132	0.060754	0.950263	1385	1	0.22292	0.51709	0.55379	1	11936	1	0.22292
SYDE2	6	0.021189	0.060895	0.951105	1386	4	-0.81707	0.14208	0.2395	0.992328	5223	2	-0.81707
GSPT2	6	0.021202	0.060933	0.951105	1387	3	0.4388	0.29908	0.41095	1	8845	2	0.4388
IL13	6	0.021205	0.06094	0.951105	1388	4	-0.51982	0.94945	0.94947	1	20395	0	-0.51982
STK31	6	0.02128	0.061132	0.951451	1389	2	0.29861	0.74763	0.74743	1	16029	0	0.29861
RUSC1	6	0.021302	0.061192	0.951451	1390	3	-0.086952	0.4406	0.5041	1	10844	1	-0.086952
BMX	6	0.021318	0.061232	0.951451	1391	4	-0.54107	0.97745	0.97731	1	21046	0	-0.54107
ZNF766	6	0.021349	0.061311	0.951451	1392	3	-0.4577	0.74825	0.74806	1	16048	0	-0.4577
NAT8B	6	0.021357	0.061333	0.951451	1393	4	-0.52572	0.26574	0.37464	1	8109	1	-0.52572
DTX2	6	0.021386	0.06141	0.951451	1394	3	-0.4274	0.95001	0.95003	1	20405	0	-0.4274
COMMD7	6	0.021393	0.061434	0.951451	1395	4	-0.39073	0.98981	0.98976	1	21357	0	-0.39073
FBXO11	6	0.021399	0.061449	0.951451	1396	4	-0.63718	0.9645	0.9644	1	20750	0	-0.63718
GPR114	6	0.021403	0.061462	0.951451	1397	3	-0.14866	0.16031	0.26028	0.993117	5666	1	-0.14866
AP2A1	6	0.021428	0.061525	0.951451	1398	2	0.040276	0.78659	0.78646	1	16873	0	0.040276
PAPOLA	6	0.021441	0.061554	0.951451	1399	4	-0.70814	0.47079	0.52309	1	11271	1	-0.70814
IL18BP	6	0.021451	0.061574	0.951451	1400	3	-0.38152	0.75225	0.75208	1	16132	0	-0.38152
TRIM69	6	0.021456	0.061581	0.951451	1401	3	-0.39561	0.79414	0.79398	1	17031	0	-0.39561
MMP11	6	0.021477	0.061637	0.951451	1402	3	-0.64589	0.9146	0.91461	1	19665	0	-0.64589
OSBPL2	6	0.021478	0.061641	0.951451	1403	2	0.26085	0.32088	0.43512	1	9323	2	0.26085
SMURF2	6	0.021487	0.061664	0.951451	1404	4	-0.97958	0.80928	0.80913	1	17362	0	-0.97958
OCM2	4	0.02152	0.061759	0.951498	1405	2	-0.43231	0.62527	0.63455	1	13624	0	-0.43231
TANC1	6	0.021527	0.061776	0.951498	1406	3	-0.48769	0.95162	0.95162	1	20437	0	-0.48769
HHIP	6	0.021536	0.061799	0.951498	1407	2	-0.099615	0.50707	0.54699	1	11788	1	-0.099615
C22orf42	6	0.02157	0.061886	0.952151	1408	3	-0.19598	0.95698	0.95692	1	20562	0	-0.19598
hsa-mir-6130	4	0.021606	0.061985	0.952449	1409	3	-0.77811	0.99455	0.99451	1	21478	0	-0.77811
PRAP1	6	0.021626	0.062035	0.952449	1410	3	-0.42285	0.7179	0.71778	1	15406	1	-0.42285
GRAMD1C	6	0.021626	0.062037	0.952449	1411	4	-0.53818	0.038566	0.089532	0.96338	2004	1	-0.53818
TMEM56-RWDD3	1	0.02166	0.062126	0.952483	1412	1	-1.2877	0.97834	0.97819	1	21071	0	-1.2877
FAM221B	6	0.021675	0.062172	0.952483	1413	2	-0.15274	0.75974	0.75953	1	16276	0	-0.15274
HNRNPF	6	0.021687	0.062208	0.952483	1414	4	-0.4983	0.046501	0.10434	0.965246	2334	2	-0.4983
N6AMT1	6	0.021694	0.062221	0.952483	1415	4	-0.54206	0.5632	0.5864	1	12608	1	-0.54206
NonTargetingControlGuideForHuman_0729	1	0.02171	0.062268	0.952483	1416	1	-0.98582	0.97829	0.97815	1	21068	0	-0.98582
YEATS4	6	0.021724	0.062303	0.952483	1417	3	-0.35402	0.93717	0.93725	1	20139	0	-0.35402
VPS13D	6	0.021773	0.062431	0.953648	1418	2	-0.47369	0.97415	0.97405	1	20972	0	-0.47369
NMRAL1	6	0.021809	0.062521	0.953648	1419	4	-0.50601	0.99316	0.99312	1	21449	0	-0.50601
EIF1AX	6	0.021823	0.062553	0.953648	1420	1	-0.18446	0.95975	0.95969	1	20647	0	-0.18446
PDIA4	6	0.021837	0.062584	0.953648	1421	4	-0.41161	0.45648	0.51397	1	11067	1	-0.41161
DGKI	6	0.021862	0.062652	0.953648	1422	3	-0.38902	0.46258	0.51777	1	11157	1	-0.38902
REM1	6	0.021872	0.062678	0.953648	1423	1	0.22606	0.15761	0.25726	0.993117	5606	2	0.22606
PREX1	6	0.021875	0.062687	0.953648	1424	3	-0.076489	0.042884	0.097677	0.96338	2183	1	-0.076489
AMFR	6	0.021938	0.062842	0.953734	1425	3	-0.73229	0.54221	0.57128	1	12276	1	-0.73229
MRPL36	6	0.021965	0.062919	0.953734	1426	3	-0.17904	0.48401	0.53165	1	11450	1	-0.17904
TRIP10	6	0.021965	0.062921	0.953734	1427	4	-0.56192	0.97303	0.97293	1	20950	0	-0.56192
FAM86B2	3	0.021978	0.06295	0.953734	1428	2	-0.94035	0.80135	0.80119	1	17190	0	-0.94035
KLF14	6	0.021995	0.062986	0.953734	1429	3	-0.54318	0.98302	0.98286	1	21186	0	-0.54318
MTRNR2L6	6	0.022033	0.063094	0.953734	1430	3	-0.029602	0.2061	0.30991	0.996432	6735	2	-0.029602
NDUFC2-KCTD14	4	0.022042	0.063116	0.953734	1431	2	-0.89914	0.26312	0.37178	1	8045	1	-0.89914
DIEXF	6	0.022042	0.063117	0.953734	1432	4	-0.55151	0.47936	0.5286	1	11388	1	-0.55151
SNRNP200	6	0.022059	0.063155	0.953734	1433	2	-0.15979	0.71857	0.71846	1	15422	1	-0.15979
EXO1	6	0.022069	0.063175	0.953734	1434	1	0.37197	0.034558	0.08203	0.96338	1834	3	0.37197
NADKD1	6	0.02207	0.063177	0.953734	1435	4	-0.5626	0.61004	0.62226	1	13359	1	-0.5626
SYMPK	6	0.022119	0.06329	0.954579	1436	3	0.024584	0.53121	0.56352	1	12128	1	0.024584
ZNF229	6	0.022152	0.063368	0.954579	1437	3	-0.35345	0.29603	0.40757	1	8778	2	-0.35345
DHPS	6	0.022168	0.063405	0.954579	1438	3	-0.31912	0.034476	0.081888	0.96338	1830	1	-0.31912
MRPL23	6	0.02217	0.063409	0.954579	1439	3	-0.99507	0.61133	0.62326	1	13380	1	-0.99507
VPS26A	6	0.022232	0.063575	0.955021	1440	2	-0.66184	0.02522	0.064398	0.953226	1458	1	-0.66184
AIFM3	6	0.022252	0.063628	0.955021	1441	4	-0.44028	0.24758	0.35478	0.999909	7678	1	-0.44028
KRTAP8-1	6	0.022255	0.063634	0.955021	1442	4	-0.59952	0.97201	0.97189	1	20924	0	-0.59952
VCL	6	0.022258	0.063644	0.955021	1443	3	-0.11996	0.15536	0.25472	0.993117	5539	2	-0.11996
CCDC42B	6	0.022289	0.063723	0.955021	1444	4	-0.52894	0.44461	0.50661	1	10904	1	-0.52894
CBY1	6	0.022313	0.063783	0.955021	1445	3	-0.58472	0.93437	0.93444	1	20072	0	-0.58472
MED23	6	0.022316	0.063789	0.955021	1446	3	-0.26553	0.66136	0.66516	1	14274	1	-0.26553
SLCO5A1	6	0.022317	0.063792	0.955021	1447	4	-0.43075	0.77392	0.77373	1	16572	0	-0.43075
PPOX	6	0.022365	0.063918	0.956249	1448	2	-0.21822	0.14164	0.239	0.992328	5214	1	-0.21822
NPAS4	6	0.022414	0.06404	0.957413	1449	1	-0.33708	0.98832	0.98823	1	21319	0	-0.33708
YTHDF2	6	0.022483	0.064223	0.959465	1450	2	0.25947	0.29201	0.40321	1	8696	1	0.25947
hsa-mir-6124	4	0.022507	0.064265	0.959465	1451	2	-1.0509	0.83968	0.8396	1	18012	0	-1.0509
MRPL33	6	0.022529	0.064327	0.959724	1452	3	-1.1491	0.91809	0.91817	1	19751	0	-1.1491
DNAJB7	6	0.022562	0.064398	0.959885	1453	1	0.20903	0.0053505	0.017335	0.915126	388	2	0.20903
GTF2A1	6	0.022607	0.064518	0.959885	1454	4	-0.53296	0.89227	0.89208	1	19183	0	-0.53296
EHMT1	6	0.022612	0.064526	0.959885	1455	3	-0.47495	0.96104	0.96093	1	20675	0	-0.47495
KCNJ13	6	0.022639	0.064592	0.959885	1456	4	-0.40435	0.99329	0.99325	1	21452	0	-0.40435
PPIL4	6	0.022661	0.064642	0.959885	1457	1	0.44064	0.31911	0.43312	1	9291	2	0.44064
ZFC3H1	6	0.02267	0.064666	0.959885	1458	4	-0.66277	0.95043	0.95046	1	20411	0	-0.66277
hsa-mir-4654	4	0.02269	0.064712	0.959885	1459	1	0.37613	0.54995	0.57676	1	12403	1	0.37613
ADAM30	6	0.022695	0.064726	0.959885	1460	4	-0.47502	0.99594	0.99594	1	21515	0	-0.47502
GJA8	6	0.02271	0.064757	0.959885	1461	3	-0.38841	0.69664	0.69713	1	14979	1	-0.38841
DNAJA3	6	0.022719	0.064781	0.959885	1462	2	-0.009156	0.063804	0.13583	0.977122	3006	1	-0.009156
ITGB1BP2	6	0.022736	0.064834	0.960007	1463	4	-0.46064	0.011173	0.033876	0.915126	779	1	-0.46064
VWC2	6	0.022805	0.06501	0.961968	1464	4	-0.49415	0.98698	0.98685	1	21282	0	-0.49415
ACOT8	6	0.022849	0.065143	0.963006	1465	4	-0.45887	0.058515	0.12618	0.976213	2795	1	-0.45887
MGAT4A	6	0.022861	0.06517	0.963006	1466	3	-0.36174	0.84185	0.84174	1	18061	0	-0.36174
ESAM	6	0.022911	0.065296	0.964213	1467	2	0.47717	0.66732	0.67039	1	14372	1	0.47717
ARF4	6	0.022981	0.065486	0.964896	1468	3	-0.90472	0.99744	0.99741	1	21551	0	-0.90472
P2RX1	6	0.022999	0.065533	0.964896	1469	3	-0.39506	0.98302	0.98286	1	21185	0	-0.39506
ST3GAL1	6	0.023039	0.065619	0.964896	1470	3	-0.32735	0.57809	0.59752	1	12841	1	-0.32735
BORA	6	0.023055	0.06566	0.964896	1471	1	-0.077621	0.71426	0.71415	1	15316	1	-0.077621
IKZF1	6	0.023071	0.0657	0.964896	1472	4	-0.48885	0.25782	0.36599	0.999919	7924	1	-0.48885
ABLIM3	6	0.0231	0.065775	0.964896	1473	4	-0.52721	0.86333	0.86332	1	18544	0	-0.52721
KBTBD13	6	0.023104	0.065788	0.964896	1474	3	-0.22358	0.69904	0.69941	1	15034	1	-0.22358
MTMR11	6	0.023108	0.065799	0.964896	1475	3	-0.21519	0.55508	0.58049	1	12488	1	-0.21519
UAP1	6	0.023122	0.065833	0.964896	1476	4	-0.54702	0.96371	0.96361	1	20733	0	-0.54702
TCEB3CL2	2	0.023131	0.065853	0.964896	1477	2	-1.0655	0.97687	0.97672	1	21029	0	-1.0655
SERPINB3	6	0.023153	0.06591	0.964896	1478	1	0.43851	0.087976	0.17832	0.987867	3906	2	0.43851
JUNB	6	0.023163	0.065929	0.964896	1479	4	-0.62696	0.81854	0.81842	1	17566	0	-0.62696
TNPO2	6	0.02317	0.065952	0.964896	1480	4	-0.79304	0.36125	0.45772	1	9823	1	-0.79304
CEP57	6	0.023203	0.06604	0.964896	1481	1	0.13609	0.36539	0.46004	1	9874	1	0.13609
hsa-mir-621	4	0.023207	0.066052	0.964896	1482	3	-1.5195	0.34503	0.44882	1	9630	1	-1.5195
DDOST	6	0.023218	0.066079	0.964896	1483	3	-0.67766	0.96301	0.96288	1	20716	0	-0.67766
GUCA1C	6	0.023227	0.066099	0.964896	1484	4	-0.52188	0.99575	0.99576	1	21510	0	-0.52188
CTNNBIP1	6	0.023301	0.066284	0.96694	1485	4	-0.58459	0.91664	0.91669	1	19720	0	-0.58459
CASP8AP2	6	0.023386	0.066495	0.967458	1486	3	-0.72379	0.0062868	0.020066	0.915126	465	1	-0.72379
NMD3	6	0.0234	0.066522	0.967458	1487	3	-0.53554	0.095531	0.18699	0.988234	4093	2	-0.53554
ERMARD	6	0.023422	0.066582	0.967458	1488	4	-0.52219	0.231	0.33683	0.999833	7297	2	-0.52219
PTPRJ	6	0.023426	0.06659	0.967458	1489	3	-0.48668	0.81502	0.81489	1	17490	0	-0.48668
NCSTN	6	0.023439	0.066624	0.967458	1490	3	-0.32123	0.19579	0.29875	0.994216	6496	1	-0.32123
SEC62	6	0.023449	0.066649	0.967458	1491	2	-0.27314	0.90904	0.90898	1	19558	0	-0.27314
RHD	6	0.023474	0.066718	0.967458	1492	4	-0.51696	0.97718	0.97703	1	21041	0	-0.51696
CPNE3	6	0.023498	0.066787	0.967458	1493	1	0.15249	0.041818	0.095708	0.96338	2147	1	0.15249
hsa-mir-3176	4	0.0235	0.066792	0.967458	1494	3	-0.83539	0.73771	0.73749	1	15806	0	-0.83539
NUP62CL	6	0.023504	0.066801	0.967458	1495	3	-0.38412	0.18157	0.28337	0.993117	6172	2	-0.38412
PDE4DIP	6	0.023532	0.066862	0.967458	1496	4	-0.5116	0.54519	0.57337	1	12328	1	-0.5116
OR51I2	6	0.023532	0.066865	0.967458	1497	3	-0.30532	0.95595	0.95591	1	20538	0	-0.30532
hsa-mir-4714	4	0.023559	0.066929	0.967458	1498	2	-0.32891	0.47975	0.52886	1	11393	1	-0.32891
TEKT5	6	0.02359	0.067015	0.967458	1499	3	-0.10273	0.87232	0.87223	1	18738	0	-0.10273
EXOSC8	6	0.023597	0.067031	0.967458	1500	2	-0.54848	0.12541	0.22068	0.992328	4786	1	-0.54848
KLRG2	6	0.023643	0.067145	0.967458	1501	3	-0.32192	0.26298	0.37165	1	8042	1	-0.32192
EPHA6	6	0.023646	0.067149	0.967458	1502	2	-0.5036	0.40202	0.48104	1	10360	1	-0.5036
TSHZ3	6	0.023679	0.067236	0.967458	1503	2	-0.23594	0.19197	0.29461	0.994216	6409	1	-0.23594
SLC4A1	6	0.023695	0.067276	0.967458	1504	3	-0.36135	0.57276	0.59352	1	12766	1	-0.36135
KRTAP4-11	6	0.023695	0.067276	0.967458	1505	3	-0.40733	0.19659	0.29963	0.994216	6517	1	-0.40733
UNC50	6	0.023745	0.067399	0.967458	1506	4	-0.93383	0.13725	0.23396	0.992328	5091	1	-0.93383
SLC31A1	6	0.023746	0.067401	0.967458	1507	3	-0.54071	0.31703	0.43081	1	9235	1	-0.54071
DDR1	6	0.023755	0.067426	0.967458	1508	3	-0.28706	0.74725	0.74706	1	16020	0	-0.28706
KLC2	6	0.023759	0.067433	0.967458	1509	2	-0.12623	0.84508	0.84502	1	18142	0	-0.12623
NHLRC4	6	0.023777	0.067481	0.967458	1510	2	-0.16819	0.2017	0.30512	0.995192	6637	2	-0.16819
TMEM9B	6	0.02379	0.067518	0.967458	1511	4	-0.48789	0.86902	0.86901	1	18665	0	-0.48789
APOC2	6	0.023794	0.067525	0.967458	1512	1	0.29827	0.55451	0.58008	1	12479	1	0.29827
BTF3	6	0.023829	0.06762	0.96818	1513	4	-0.58411	0.9846	0.98447	1	21220	0	-0.58411
MRPL19	6	0.023877	0.067748	0.969372	1514	3	-0.25093	0.21864	0.32339	0.999387	7000	1	-0.25093
AMIGO1	6	0.02393	0.067881	0.970287	1515	4	-0.77059	0.58442	0.60238	1	12949	1	-0.77059
TMEM65	6	0.023985	0.068031	0.970287	1516	4	-0.38666	0.88137	0.88115	1	18952	0	-0.38666
ZNF266	6	0.023994	0.068056	0.970287	1517	3	-0.56208	0.13186	0.22795	0.992328	4940	1	-0.56208
PPP5D1	6	0.024031	0.068141	0.970287	1518	4	-0.70585	0.17889	0.28049	0.993117	6097	2	-0.70585
STX18	6	0.024044	0.068171	0.970287	1519	4	-0.87026	0.43367	0.49984	1	10758	1	-0.87026
SNX4	6	0.024057	0.068206	0.970287	1520	4	-0.43532	0.62656	0.63562	1	13648	1	-0.43532
CCDC88B	6	0.02406	0.068211	0.970287	1521	4	-0.42209	0.9258	0.9259	1	19898	0	-0.42209
EIF4G2	6	0.024063	0.068217	0.970287	1522	3	-0.91898	0.21244	0.31678	0.998581	6869	1	-0.91898
ANO8	6	0.024077	0.068255	0.970287	1523	4	-0.66096	0.99708	0.99704	1	21539	0	-0.66096
hsa-mir-3116-1	4	0.024079	0.06826	0.970287	1524	2	-0.30104	0.84331	0.84318	1	18099	0	-0.30104
LPXN	6	0.024122	0.06838	0.971023	1525	4	-0.29795	0.8641	0.86411	1	18559	0	-0.29795
SRRM5	6	0.024179	0.068521	0.971023	1526	2	0.31474	0.21223	0.31657	0.998581	6862	2	0.31474
KRTAP7-1	6	0.024187	0.068538	0.971023	1527	2	-0.11122	0.91069	0.91066	1	19589	0	-0.11122
DUSP2	6	0.024201	0.068576	0.971023	1528	4	-0.43862	0.97478	0.97466	1	20988	0	-0.43862
DCAF6	6	0.024221	0.068635	0.971023	1529	4	-0.48095	0.7441	0.74387	1	15952	0	-0.48095
TRPC1	6	0.024234	0.068672	0.971023	1530	4	-0.74974	0.96673	0.96667	1	20803	0	-0.74974
KDM2A	6	0.024237	0.06868	0.971023	1531	3	-1.2839	0.98543	0.98532	1	21239	0	-1.2839
KCNH3	6	0.024253	0.068718	0.971023	1532	3	-0.51315	0.85612	0.85609	1	18403	0	-0.51315
NF1	6	0.024269	0.06876	0.971023	1533	2	-0.044746	0.9654	0.96533	1	20768	0	-0.044746
UBXN2A	6	0.024271	0.068766	0.971023	1534	3	-0.7074	0.59664	0.61174	1	13137	1	-0.7074
2018-03-02	6	0.024286	0.068805	0.971023	1535	1	0.1877	0.32918	0.44026	1	9420	1	0.1877
ZNF839	6	0.024335	0.068936	0.971491	1536	1	-0.13772	0.31951	0.43357	1	9295	1	-0.13772
REST	6	0.024347	0.068968	0.971491	1537	3	-0.1594	0.5609	0.58472	1	12567	1	-0.1594
ANKRD17	6	0.024349	0.068973	0.971491	1538	4	-1.0383	0.90699	0.9069	1	19524	0	-1.0383
TRPV3	6	0.024385	0.069057	0.972044	1539	4	-0.63488	0.99309	0.99304	1	21448	0	-0.63488
STARD4	6	0.024418	0.069149	0.972705	1540	4	-0.6074	0.50812	0.54773	1	11803	1	-0.6074
DUSP23	6	0.024468	0.069271	0.973092	1541	4	-0.57144	0.043755	0.09924	0.96338	2224	1	-0.57144
MED17	6	0.02448	0.069301	0.973092	1542	3	-0.78385	0.77065	0.7705	1	16516	0	-0.78385
FLNB	6	0.024484	0.069311	0.973092	1543	4	-0.41875	0.65311	0.65797	1	14116	1	-0.41875
LPCAT1	6	0.024532	0.06942	0.973994	1544	3	-0.41601	0.75891	0.75869	1	16255	0	-0.41601
NonTargetingControlGuideForHuman_0451	1	0.024556	0.069481	0.974216	1545	1	-1.6829	0.97544	0.97532	1	21001	0	-1.6829
KRT26	6	0.024584	0.06956	0.974473	1546	3	-0.53694	0.96895	0.96886	1	20857	0	-0.53694
PRR7	6	0.024597	0.069589	0.974473	1547	4	-0.47156	0.87823	0.87807	1	18886	0	-0.47156
MKKS	6	0.024648	0.069725	0.975382	1548	2	0.13396	0.82054	0.82048	1	17610	0	0.13396
DHX40	6	0.024679	0.069802	0.975382	1549	1	0.23159	0.225	0.33027	0.999387	7151	2	0.23159
C14orf39	6	0.024684	0.069814	0.975382	1550	3	-0.468	0.9536	0.95355	1	20486	0	-0.468
PHKA2	6	0.024693	0.069834	0.975382	1551	4	-0.42442	0.8012	0.80104	1	17187	0	-0.42442
SLC17A9	6	0.024775	0.070038	0.976294	1552	3	-0.47046	0.99738	0.99735	1	21548	0	-0.47046
KRTAP24-1	6	0.024793	0.070082	0.976294	1553	2	-0.044459	0.67786	0.67977	1	14585	1	-0.044459
EXOC5	4	0.024795	0.070088	0.976294	1554	1	-0.13777	0.95539	0.95533	1	20520	0	-0.13777
RGMA	6	0.024807	0.070118	0.976294	1555	4	-0.57697	0.59306	0.60898	1	13077	1	-0.57697
WDR11	6	0.024829	0.070169	0.976294	1556	2	-0.041584	0.29021	0.40127	1	8650	1	-0.041584
CHTF18	6	0.024857	0.070238	0.976294	1557	3	-0.34068	0.98908	0.98901	1	21342	0	-0.34068
LGALS9C	4	0.024883	0.070307	0.976294	1558	3	-0.79057	0.5811	0.59982	1	12894	0	-0.79057
ILF2	5	0.024907	0.070369	0.976294	1559	3	-0.73656	0.37823	0.46729	1	10043	1	-0.73656
CUL1	6	0.024914	0.07039	0.976294	1560	3	-0.19066	0.34843	0.4507	1	9679	1	-0.19066
ZNF75A	6	0.024925	0.070411	0.976294	1561	1	0.11911	0.67496	0.67718	1	14529	1	0.11911
ONECUT3	6	0.024937	0.070445	0.976294	1562	4	-0.48184	0.9294	0.92947	1	19976	0	-0.48184
LRRC2	6	0.024943	0.070456	0.976294	1563	3	-0.0071967	0.073819	0.15361	0.979789	3382	3	-0.0071967
PGAM5	6	0.024957	0.070489	0.976294	1564	3	-0.3901	0.22458	0.32984	0.999387	7137	2	-0.3901
DSG2	6	0.024984	0.07055	0.976294	1565	4	-0.42844	0.9674	0.96732	1	20817	0	-0.42844
GJA10	6	0.025024	0.070648	0.976294	1566	3	-0.1416	0.04348	0.098755	0.96338	2213	2	-0.1416
NLGN1	6	0.025073	0.070795	0.976294	1567	1	0.0046135	0.58562	0.60328	1	12977	1	0.0046135
SNCA	6	0.025097	0.070857	0.976294	1568	3	-0.47874	0.98606	0.98595	1	21256	0	-0.47874
hsa-mir-6134	4	0.025124	0.070914	0.976294	1569	3	-0.5128	0.65783	0.66207	1	14208	0	-0.5128
VSIG10L	6	0.025166	0.071021	0.976294	1570	2	-0.20326	0.96532	0.96525	1	20766	0	-0.20326
ETFA	6	0.025171	0.071037	0.976294	1571	2	0.11141	0.92547	0.92554	1	19891	0	0.11141
KDM1A	6	0.025206	0.071127	0.976294	1572	4	-0.55166	0.9218	0.92187	1	19819	0	-0.55166
VIM	6	0.02522	0.071166	0.976294	1573	2	0.1607	0.76827	0.76813	1	16464	0	0.1607
POLR2B	6	0.025248	0.071255	0.976294	1574	2	0.23595	0.2351	0.34128	0.999833	7384	2	0.23595
ANKK1	6	0.025257	0.071279	0.976294	1575	4	-0.42447	0.99431	0.99427	1	21473	0	-0.42447
ZG16B	6	0.025266	0.071302	0.976294	1576	3	-0.2492	0.34044	0.44633	1	9564	1	-0.2492
GPS1	6	0.025269	0.071313	0.976294	1577	2	0.19026	0.51247	0.55065	1	11870	1	0.19026
C19orf26	6	0.025284	0.071351	0.976294	1578	4	-0.55179	0.89753	0.89737	1	19297	0	-0.55179
ATP13A1	6	0.02529	0.07137	0.976294	1579	4	-0.60245	0.99227	0.99219	1	21419	0	-0.60245
PRKD3	6	0.025295	0.07138	0.976294	1580	3	-0.32444	0.055454	0.12062	0.971674	2685	1	-0.32444
CSRP2	6	0.025307	0.071412	0.976294	1581	4	-0.34919	0.73835	0.73813	1	15819	0	-0.34919
BMPER	6	0.025311	0.071424	0.976294	1582	4	-0.33642	0.63817	0.64519	1	13851	1	-0.33642
FAXC	6	0.025317	0.071445	0.976294	1583	4	-0.73509	0.9835	0.98337	1	21196	0	-0.73509
PFKP	6	0.025319	0.071448	0.976294	1584	2	0.49931	0.65445	0.65918	1	14141	1	0.49931
ATP6V1D	6	0.025324	0.071462	0.976294	1585	3	-0.5616	0.7972	0.79701	1	17102	0	-0.5616
FAM105B	6	0.025344	0.071514	0.976294	1586	4	-0.62428	0.51289	0.55092	1	11878	1	-0.62428
TEKT3	6	0.025348	0.071523	0.976294	1587	4	-0.35349	0.81064	0.81052	1	17396	0	-0.35349
ME2	6	0.025368	0.071575	0.976294	1588	2	0.23265	0.6778	0.67972	1	14583	1	0.23265
PSG2	6	0.025402	0.071658	0.976294	1589	4	-0.72635	0.73896	0.73875	1	15832	0	-0.72635
GLB1L	6	0.025417	0.071702	0.976294	1590	2	-0.012839	0.69569	0.69628	1	14964	1	-0.012839
TTC37	6	0.025422	0.071719	0.976294	1591	4	-0.6409	0.71288	0.71281	1	15287	1	-0.6409
SLC35G6	6	0.025446	0.071782	0.976294	1592	4	-0.64101	0.95368	0.95364	1	20488	0	-0.64101
TRMT6	6	0.025463	0.071823	0.976294	1593	4	-0.78605	0.99518	0.99516	1	21492	0	-0.78605
TAF4B	6	0.02547	0.071837	0.976294	1594	4	-0.50873	0.70079	0.70109	1	15065	1	-0.50873
LYSMD4	6	0.025528	0.072001	0.97714	1595	3	-0.56631	0.85415	0.85416	1	18346	0	-0.56631
ZNF264	6	0.025564	0.072089	0.97714	1596	2	-0.42452	0.65377	0.65855	1	14125	1	-0.42452
COPS4	6	0.025582	0.072134	0.97714	1597	4	-0.42715	0.98667	0.98654	1	21270	0	-0.42715
NFIX	6	0.025586	0.072139	0.97714	1598	4	-0.52776	0.79957	0.79939	1	17156	0	-0.52776
ADM2	6	0.025591	0.072151	0.97714	1599	3	-0.64595	0.90907	0.909	1	19559	0	-0.64595
COMMD2	6	0.025606	0.072192	0.97714	1600	4	-0.43133	0.23288	0.3389	0.999833	7337	1	-0.43133
hsa-mir-5093	4	0.02566	0.072335	0.97714	1601	3	-1.2004	0.95596	0.95591	1	20539	0	-1.2004
ALAS2	6	0.025663	0.072336	0.97714	1602	3	-0.29306	0.92162	0.92169	1	19815	0	-0.29306
EPPIN	6	0.025716	0.072465	0.97714	1603	3	-0.24611	0.55328	0.57922	1	12458	1	-0.24611
ENO3	6	0.025718	0.072469	0.97714	1604	3	-0.22566	0.65891	0.663	1	14229	1	-0.22566
OR52I1	6	0.025744	0.072538	0.97714	1605	3	-0.35942	0.44378	0.50609	1	10894	1	-0.35942
REEP6	6	0.025753	0.072561	0.97714	1606	4	-0.43946	0.96091	0.9608	1	20671	0	-0.43946
MGAT4B	6	0.025761	0.072583	0.97714	1607	2	0.18435	0.18251	0.28436	0.993117	6200	1	0.18435
hsa-mir-509-1	4	0.025772	0.072605	0.97714	1608	3	-0.32512	0.56773	0.58977	1	12680	1	-0.32512
IGFN1	6	0.02581	0.072704	0.97714	1609	3	-0.059781	0.31064	0.42365	1	9102	1	-0.059781
ZIC5	6	0.025818	0.072719	0.97714	1610	4	-0.56913	0.98486	0.98472	1	21227	0	-0.56913
FKBP11	6	0.025821	0.072726	0.97714	1611	4	-0.44995	0.60065	0.61485	1	13198	1	-0.44995
STK25	6	0.025827	0.072735	0.97714	1612	2	-0.1802	0.26081	0.36929	1	7992	2	-0.1802
PRIM1	6	0.025856	0.072791	0.97714	1613	4	-0.4257	0.17153	0.27255	0.993117	5925	1	-0.4257
TIRAP	6	0.025859	0.072802	0.97714	1614	2	0.12549	0.33877	0.44544	1	9542	1	0.12549
SRRD	6	0.025908	0.072923	0.977507	1615	3	-0.41571	0.79834	0.79815	1	17126	0	-0.41571
MC1R	6	0.02591	0.072928	0.977507	1616	2	0.23349	0.23276	0.33877	0.999833	7331	2	0.23349
XCL2	3	0.025923	0.072964	0.977507	1617	2	-0.76952	0.96681	0.96676	1	20805	0	-0.76952
GCNT3	6	0.025938	0.07301	0.977515	1618	3	-0.33653	0.0026841	0.0094524	0.903978	226	1	-0.33653
RRP1	6	0.025976	0.073091	0.977578	1619	4	-0.54606	0.27251	0.38204	1	8264	1	-0.54606
RNF224	6	0.025987	0.07312	0.977578	1620	4	-0.57158	0.91175	0.91173	1	19607	0	-0.57158
NUTM2A	6	0.026007	0.073173	0.977578	1621	2	0.15716	0.51261	0.55075	1	11871	1	0.15716
MAPKAPK5	6	0.026021	0.0732	0.977578	1622	4	-0.68225	0.99952	0.99951	1	21624	0	-0.68225
RORC	6	0.026038	0.07324	0.977578	1623	4	-0.59623	0.72532	0.72526	1	15563	0	-0.59623
FRMD4A	6	0.026101	0.0734	0.978812	1624	3	-0.30877	0.16133	0.26149	0.993117	5689	2	-0.30877
QPRT	6	0.026111	0.073423	0.978812	1625	4	-0.49685	0.91293	0.91293	1	19626	0	-0.49685
TCP11L1	6	0.026154	0.073541	0.978918	1626	1	-0.10128	0.78259	0.78243	1	16784	0	-0.10128
FGD4	6	0.026203	0.073663	0.978918	1627	3	-0.32815	0.13516	0.23162	0.992328	5021	2	-0.32815
C22orf23	6	0.026207	0.07367	0.978918	1628	2	-0.14734	0.95383	0.95379	1	20493	0	-0.14734
CIDEB	6	0.026239	0.073751	0.978918	1629	4	-0.64497	0.40971	0.48559	1	10457	1	-0.64497
FAM216A	6	0.026252	0.07378	0.978918	1630	2	-0.4864	0.77766	0.77752	1	16666	0	-0.4864
TGFA	6	0.026263	0.07381	0.978918	1631	2	-0.23826	0.78135	0.78119	1	16751	0	-0.23826
PARP3	6	0.026266	0.073821	0.978918	1632	4	-0.38947	0.77376	0.77358	1	16567	0	-0.38947
CBWD1	6	0.026272	0.073836	0.978918	1633	3	-0.266	0.0056871	0.018368	0.915126	412	2	-0.266
GPRC5A	6	0.026291	0.073879	0.978918	1634	2	-0.34079	0.52042	0.55605	1	11987	1	-0.34079
THADA	6	0.026338	0.073991	0.978918	1635	3	-0.081201	0.23421	0.34031	0.999833	7361	1	-0.081201
MYBPC1	6	0.026392	0.074116	0.978918	1636	3	-0.37855	0.92185	0.92192	1	19823	0	-0.37855
UMPS	6	0.0264	0.07413	0.978918	1637	1	1.3637	0.025718	0.065343	0.953226	1478	3	1.3637
FBXO32	6	0.026432	0.074196	0.978918	1638	3	-0.21099	0.88958	0.88938	1	19123	0	-0.21099
METAP1	6	0.026449	0.074227	0.978918	1639	2	-0.13285	0.44008	0.50377	1	10835	1	-0.13285
PLEKHG5	6	0.026449	0.074227	0.978918	1640	2	-0.037531	0.97473	0.97461	1	20985	0	-0.037531
CDNF	6	0.026462	0.074254	0.978918	1641	3	-0.5646	0.65784	0.66207	1	14209	1	-0.5646
OLFML2B	6	0.026467	0.074262	0.978918	1642	3	-0.058777	0.25272	0.36039	0.999909	7793	2	-0.058777
PCDHGB6	2	0.02648	0.074285	0.978918	1643	2	-0.74331	0.97352	0.97341	1	20956	0	-0.74331
C6orf7	6	0.026482	0.07429	0.978918	1644	3	-0.16274	0.5513	0.57778	1	12420	1	-0.16274
PPP2R2A	6	0.026596	0.074514	0.980723	1645	1	0.016416	0.78684	0.78671	1	16878	0	0.016416
SLMO2	6	0.026598	0.074518	0.980723	1646	2	0.16156	0.35536	0.45444	1	9756	1	0.16156
HEMGN	6	0.026631	0.074583	0.980723	1647	3	-0.86029	0.4432	0.50571	1	10879	1	-0.86029
PREP	6	0.026661	0.074641	0.980723	1648	3	-0.48061	0.58817	0.60525	1	13010	1	-0.48061
hsa-mir-6787	4	0.026667	0.074653	0.980723	1649	2	-0.79986	0.368	0.4615	1	9906	1	-0.79986
GLOD5	6	0.026694	0.074701	0.980753	1650	2	-0.049152	0.90502	0.90493	1	19485	0	-0.049152
C19orf80	6	0.026793	0.074895	0.982708	1651	1	1.0998	0.0090962	0.028041	0.915126	649	4	1.0998
RAPGEF6	6	0.026842	0.074976	0.983174	1652	3	-0.46241	0.18061	0.28236	0.993117	6141	2	-0.46241
NRTN	6	0.026891	0.07507	0.983807	1653	1	0.13698	0.88331	0.88306	1	18995	0	0.13698
hsa-mir-3664	4	0.026957	0.075191	0.983812	1654	3	-0.78743	0.92931	0.92938	1	19972	0	-0.78743
CCDC67	6	0.026964	0.075209	0.983812	1655	3	-0.066931	0.12735	0.22287	0.992328	4834	2	-0.066931
QRSL1	6	0.026989	0.075253	0.983812	1656	1	-0.083341	0.07247	0.15127	0.979789	3338	1	-0.083341
SLC25A42	6	0.026992	0.075262	0.983812	1657	3	-0.43456	0.37814	0.46723	1	10042	1	-0.43456
UVSSA	6	0.027022	0.075311	0.983812	1658	3	-0.46605	0.43825	0.50266	1	10811	1	-0.46605
C1orf123	6	0.027038	0.075342	0.983812	1659	2	-0.092433	0.7798	0.77966	1	16714	0	-0.092433
AKTIP	6	0.027087	0.075436	0.984359	1660	2	-0.078962	0.58963	0.60637	1	13034	1	-0.078962
EPRS	6	0.027115	0.075492	0.984359	1661	2	0.0049831	0.05425	0.11842	0.970452	2642	2	0.0049831
DAG1	6	0.027133	0.075521	0.984359	1662	3	-0.25866	0.62989	0.63842	1	13705	1	-0.25866
GPR158	6	0.02719	0.075622	0.985083	1663	2	-0.81047	0.24417	0.35113	0.999909	7594	1	-0.81047
FOXB1	6	0.027234	0.075709	0.985627	1664	1	0.26802	0.74328	0.74308	1	15933	0	0.26802
UGCG	6	0.027275	0.075787	0.985633	1665	2	-0.19547	0.82989	0.82971	1	17806	0	-0.19547
SRSF5	6	0.027284	0.0758	0.985633	1666	2	-0.22429	0.94014	0.94017	1	20197	0	-0.22429
IL24	6	0.027333	0.075884	0.986123	1667	1	-0.0078654	0.8234	0.82331	1	17669	0	-0.0078654
ZBTB39	6	0.02737	0.075951	0.98641	1668	2	0.23373	0.079907	0.16425	0.981349	3625	3	0.23373
NINL	6	0.027436	0.076064	0.987251	1669	3	-0.7388	0.57063	0.59196	1	12734	1	-0.7388
STRA13	6	0.027493	0.076176	0.987251	1670	2	-0.27165	0.045208	0.10193	0.96338	2284	2	-0.27165
ZNF607	6	0.027529	0.076241	0.987251	1671	3	-0.22162	0.36184	0.45805	1	9833	1	-0.22162
TMEM229B	6	0.027541	0.076266	0.987251	1672	2	1.0999	0.031751	0.07669	0.96338	1721	3	1.0999
hsa-mir-4790	3	0.027555	0.076296	0.987251	1673	2	-0.82226	0.0049766	0.016251	0.915126	367	1	-0.82226
PRAMEF20	4	0.027556	0.076297	0.987251	1674	3	-0.4787	0.91254	0.91253	1	19621	0	-0.4787
FXYD4	6	0.027594	0.076369	0.987251	1675	3	-0.28409	0.30086	0.41289	1	8886	2	-0.28409
MTMR7	6	0.027627	0.076427	0.987251	1676	2	0.16842	0.74747	0.74728	1	16026	0	0.16842
PLOD2	6	0.027645	0.076463	0.987251	1677	3	-0.20913	0.80792	0.80778	1	17332	0	-0.20913
UBALD1	6	0.027676	0.076515	0.987251	1678	2	-0.22765	0.95822	0.95816	1	20598	0	-0.22765
2018-09-08	6	0.027725	0.07661	0.987251	1679	3	0.10387	0.062127	0.1328	0.976213	2940	3	0.10387
MMACHC	6	0.027726	0.076617	0.987251	1680	3	-0.48676	0.16986	0.2708	0.993117	5892	1	-0.48676
CHURC1	6	0.027808	0.076763	0.987251	1681	3	-0.45134	0.45895	0.51551	1	11103	1	-0.45134
PLCB2	6	0.027823	0.076797	0.987251	1682	2	-0.090255	0.68694	0.68803	1	14786	1	-0.090255
MARK4	6	0.027855	0.076858	0.987251	1683	2	-0.30425	0.88354	0.88328	1	19001	0	-0.30425
NonTargetingControlGuideForHuman_0142	1	0.027871	0.076892	0.987251	1684	1	-0.70291	0.97213	0.97201	1	20926	0	-0.70291
CSH1	6	0.027872	0.076893	0.987251	1685	2	0.073297	0.56345	0.58659	1	12614	1	0.073297
KRT6A	6	0.027895	0.076937	0.987251	1686	3	-0.34153	0.87298	0.87288	1	18762	0	-0.34153
SEC22C	6	0.027912	0.07697	0.987251	1687	2	-0.012363	0.058706	0.12653	0.976213	2801	2	-0.012363
SRM	6	0.027921	0.076991	0.987251	1688	3	-0.23097	0.84531	0.84526	1	18150	0	-0.23097
C5orf54	6	0.02795	0.077049	0.987251	1689	2	0.089236	0.88014	0.87996	1	18925	0	0.089236
MAP3K4	6	0.02797	0.077098	0.987251	1690	3	-0.3111	0.51843	0.55472	1	11957	1	-0.3111
DCAF10	6	0.027989	0.077129	0.987251	1691	2	-0.32714	0.93388	0.93394	1	20060	0	-0.32714
ZNF566	6	0.028008	0.077169	0.987251	1692	3	-0.50969	0.079758	0.16399	0.981349	3616	1	-0.50969
LIPG	6	0.028054	0.077257	0.987251	1693	3	-0.48328	0.48111	0.52972	1	11408	1	-0.48328
SLC4A1AP	6	0.028065	0.077275	0.987251	1694	2	-0.17426	0.99135	0.99129	1	21391	0	-0.17426
TUBG1	6	0.028069	0.077284	0.987251	1695	2	-0.049396	0.22926	0.33493	0.999645	7252	2	-0.049396
GSTM3	6	0.028075	0.0773	0.987251	1696	3	0.007258	0.10706	0.2001	0.990737	4373	2	0.007258
KLHDC3	6	0.028103	0.077357	0.987251	1697	2	-0.18719	0.90899	0.90892	1	19556	0	-0.18719
DKK4	6	0.028118	0.077383	0.987251	1698	2	0.14158	0.38316	0.4701	1	10105	1	0.14158
CEMP1	6	0.02817	0.077479	0.987397	1699	3	-0.27844	0.053536	0.11714	0.970452	2610	1	-0.27844
ATP13A3	6	0.02818	0.077497	0.987397	1700	2	-0.02843	0.71905	0.71895	1	15437	1	-0.02843
ZBTB3	6	0.028199	0.077534	0.987397	1701	3	-0.34306	0.23939	0.34588	0.999833	7492	2	-0.34306
MAK16	6	0.028266	0.077657	0.987397	1702	3	-0.52356	0.68175	0.6833	1	14666	1	-0.52356
TSEN2	6	0.028276	0.077672	0.987397	1703	2	0.21654	0.48963	0.53528	1	11533	1	0.21654
LMOD3	6	0.028305	0.077734	0.987397	1704	2	1.0963	0.047501	0.10616	0.965413	2381	3	1.0963
KAT5	6	0.028314	0.077751	0.987397	1705	2	0.13228	0.35151	0.45239	1	9709	1	0.13228
AAMP	6	0.028317	0.077759	0.987397	1706	3	-0.38447	0.17437	0.27561	0.993117	5994	2	-0.38447
FAM218A	6	0.028363	0.077839	0.987693	1707	1	0.11608	0.26572	0.37461	1	8108	2	0.11608
GBE1	6	0.028401	0.077901	0.987693	1708	2	-0.39794	0.81002	0.80987	1	17382	0	-0.39794
YWHAG	6	0.028412	0.077924	0.987693	1709	2	-0.045097	0.24214	0.34892	0.999833	7559	1	-0.045097
SLC6A3	6	0.028431	0.077968	0.987693	1710	3	-0.36592	0.6885	0.68951	1	14815	1	-0.36592
CDR2	6	0.028461	0.078034	0.987693	1711	1	0.19359	0.81697	0.81682	1	17529	0	0.19359
POP1	6	0.028507	0.078123	0.987693	1712	2	-0.20605	0.84958	0.8496	1	18242	0	-0.20605
FUT6	6	0.02851	0.07813	0.987693	1713	1	0.14495	0.7482	0.74801	1	16044	0	0.14495
hsa-mir-205	4	0.028519	0.078147	0.987693	1714	2	-0.50477	0.38979	0.47392	1	10190	1	-0.50477
MAGED4B	2	0.028659	0.078414	0.989388	1715	2	-0.74407	0.97134	0.97122	1	20915	0	-0.74407
hsa-mir-122	4	0.028667	0.078429	0.989388	1716	1	-0.63406	0.66822	0.67115	1	14393	0	-0.63406
NonTargetingControlGuideForHuman_0415	1	0.028683	0.078466	0.989388	1717	1	-0.83955	0.97132	0.97119	1	20914	0	-0.83955
ZNF692	6	0.028706	0.078506	0.989388	1718	1	0.069744	0.021132	0.05636	0.943931	1289	2	0.069744
NLGN3	6	0.028707	0.07851	0.989388	1719	3	-0.62644	0.27359	0.38322	1	8293	1	-0.62644
CADM4	6	0.028768	0.078625	0.989803	1720	2	0.37574	0.60917	0.62155	1	13344	1	0.37574
CHD3	6	0.028775	0.078634	0.989803	1721	3	-0.15151	0.68468	0.68596	1	14734	1	-0.15151
OR13A1	6	0.028845	0.078766	0.990389	1722	3	-0.49433	0.66189	0.66564	1	14284	1	-0.49433
MBD3L3	6	0.028853	0.078779	0.990389	1723	1	0.38795	0.26289	0.37156	1	8041	2	0.38795
MAML1	6	0.028874	0.078818	0.990389	1724	2	-0.24102	0.25469	0.36256	0.999909	7848	2	-0.24102
CLN5	6	0.028958	0.078986	0.990593	1725	3	-0.2719	0.70485	0.70498	1	15148	1	-0.2719
hsa-mir-548f-3	3	0.02896	0.078989	0.990593	1726	1	-0.18962	0.7414	0.74123	1	15900	0	-0.18962
YBX1	6	0.028989	0.079039	0.990593	1727	3	0.12884	0.19214	0.29479	0.994216	6412	2	0.12884
BUB3	6	0.029098	0.079253	0.990593	1728	3	-0.96959	0.99097	0.99089	1	21383	0	-0.96959
hsa-mir-1539	4	0.029105	0.079266	0.990593	1729	3	-0.7525	0.9472	0.94728	1	20342	0	-0.7525
GNB3	6	0.029141	0.079335	0.990593	1730	3	0.4854	0.032025	0.077225	0.96338	1731	3	0.4854
PGM3	6	0.029147	0.079348	0.990593	1731	3	-0.97347	0.96697	0.9669	1	20809	0	-0.97347
INHBE	6	0.029147	0.079348	0.990593	1732	3	-0.60196	0.53782	0.56818	1	12216	1	-0.60196
RBBP4	6	0.029175	0.079409	0.990593	1733	3	-0.46157	0.56846	0.59032	1	12692	1	-0.46157
LOC100127983	6	0.029196	0.079448	0.990593	1734	2	-0.52933	0.070298	0.14742	0.977122	3265	1	-0.52933
KCNN1	6	0.029343	0.07972	0.990593	1735	2	-0.51207	0.88795	0.88777	1	19095	0	-0.51207
RFX2	6	0.02936	0.079746	0.990593	1736	3	0.018095	0.58139	0.60004	1	12898	1	0.018095
COL8A2	6	0.029392	0.079808	0.990593	1737	1	-0.039043	0.17364	0.27481	0.993117	5978	2	-0.039043
RAB11A	6	0.029419	0.079858	0.990593	1738	3	-0.53693	0.019355	0.052722	0.939276	1213	1	-0.53693
hsa-mir-4737	4	0.02942	0.07986	0.990593	1739	2	-0.165	0.84327	0.84315	1	18098	0	-0.165
PTTG1	6	0.029441	0.079899	0.990593	1740	2	0.32075	0.096963	0.18865	0.989814	4126	2	0.32075
INTS6	6	0.029458	0.079926	0.990593	1741	3	-0.93748	0.99766	0.99762	1	21560	0	-0.93748
ROBO3	6	0.02949	0.079984	0.990593	1742	2	0.55416	0.29906	0.41092	1	8843	2	0.55416
PPM1K	6	0.0295	0.080002	0.990593	1743	3	-0.4644	0.68117	0.68277	1	14649	1	-0.4644
P2RX5	6	0.029526	0.08005	0.990593	1744	2	-0.23495	0.35207	0.45269	1	9715	1	-0.23495
CUL2	6	0.029539	0.08007	0.990593	1745	2	0.1003	0.014353	0.042557	0.922609	998	2	0.1003
ASF1B	6	0.029546	0.080084	0.990593	1746	2	-0.4102	0.72654	0.7264	1	15593	0	-0.4102
PARP6	5	0.02955	0.08009	0.990593	1747	1	0.091674	0.091913	0.18284	0.988043	4005	1	0.091674
hsa-mir-3687	4	0.029567	0.080119	0.990593	1748	2	-0.99605	0.36408	0.45929	1	9859	1	-0.99605
hsa-mir-4802	4	0.029616	0.080207	0.990593	1749	1	0.6551	0.11128	0.20482	0.990864	4474	2	0.6551
SLC16A11	6	0.029637	0.080244	0.990593	1750	2	-0.13285	0.13957	0.23663	0.992328	5159	2	-0.13285
ARCN1	6	0.029686	0.080339	0.990593	1751	2	0.47176	0.042929	0.097761	0.96338	2186	2	0.47176
C1orf100	6	0.029734	0.080418	0.990593	1752	3	-0.23116	0.8946	0.89442	1	19240	0	-0.23116
C1D	6	0.029782	0.080509	0.990593	1753	3	-0.11965	0.22117	0.32612	0.999387	7055	2	-0.11965
CD5	6	0.029784	0.080513	0.990593	1754	2	-0.074342	0.92551	0.92558	1	19893	0	-0.074342
hsa-mir-4734	4	0.02979	0.080526	0.990593	1755	2	-1.9148	0.68734	0.68841	1	14792	0	-1.9148
C11orf52	6	0.029856	0.080645	0.990593	1756	3	-0.3488	0.24779	0.35503	0.999909	7683	2	-0.3488
CCDC60	6	0.02986	0.080652	0.990593	1757	2	0.13654	0.40189	0.48095	1	10357	1	0.13654
hsa-mir-4308	4	0.029876	0.080685	0.990593	1758	3	-1.1097	0.50909	0.54838	1	11816	1	-1.1097
OR5AU1	6	0.029882	0.080695	0.990593	1759	1	0.59083	0.057554	0.12442	0.973584	2767	3	0.59083
ZNF91	6	0.029889	0.08071	0.990593	1760	2	-0.52406	0.06252	0.13349	0.976213	2960	2	-0.52406
MRP63	6	0.029931	0.080787	0.990593	1761	2	0.31446	0.53265	0.56456	1	12154	1	0.31446
PPID	6	0.029948	0.080822	0.990593	1762	2	-0.41738	0.94901	0.94902	1	20384	0	-0.41738
CST3	6	0.029968	0.080858	0.990593	1763	2	-0.1712	0.68516	0.6864	1	14746	1	-0.1712
AKNAD1	6	0.029968	0.080859	0.990593	1764	3	-0.46299	0.39829	0.47885	1	10298	1	-0.46299
ZFP64	6	0.029979	0.080883	0.990593	1765	3	-0.46504	0.74651	0.74634	1	16005	0	-0.46504
ZFYVE20	6	0.029995	0.080918	0.990593	1766	3	-0.36908	0.46848	0.52162	1	11235	1	-0.36908
SPA17	6	0.030017	0.080962	0.990593	1767	3	-0.61808	0.978	0.97785	1	21060	0	-0.61808
ZNF343	6	0.030027	0.08098	0.990593	1768	2	0.032138	0.83444	0.83438	1	17905	0	0.032138
C10orf10	6	0.030029	0.080983	0.990593	1769	2	-0.030336	0.90124	0.90109	1	19372	0	-0.030336
PPM1L	6	0.030038	0.080999	0.990593	1770	3	-0.136	0.023069	0.060175	0.943931	1381	2	-0.136
hsa-mir-3152	4	0.030042	0.081005	0.990593	1771	2	0.057859	0.3716	0.46349	1	9968	1	0.057859
CHEK2	6	0.03007	0.081059	0.990593	1772	3	-0.32221	0.67864	0.68048	1	14602	1	-0.32221
GRAMD1A	6	0.030078	0.081075	0.990593	1773	1	-0.023267	0.080704	0.16562	0.981901	3654	2	-0.023267
PELI1	6	0.030176	0.081255	0.992234	1774	3	-0.29026	0.80097	0.80082	1	17182	0	-0.29026
CSAG1	6	0.030247	0.081389	0.992807	1775	3	-0.56251	0.037496	0.087517	0.96338	1961	1	-0.56251
CAPS	6	0.030274	0.081432	0.992807	1776	2	-0.27539	0.8882	0.88802	1	19099	0	-0.27539
NonTargetingControlGuideForHuman_0117	1	0.030299	0.081476	0.992807	1777	1	-0.79594	0.9697	0.96958	1	20874	0	-0.79594
C9orf40	6	0.030328	0.081521	0.992807	1778	3	-0.87307	0.03911	0.090536	0.96338	2034	2	-0.87307
NDUFA2	6	0.030333	0.081531	0.992807	1779	2	0.01392	0.31706	0.43086	1	9236	1	0.01392
MCIDAS	6	0.030383	0.081634	0.993315	1780	3	0.049336	0.31717	0.43098	1	9239	1	0.049336
PAPD5	6	0.030398	0.081664	0.993315	1781	3	-0.28762	0.36219	0.45824	1	9838	1	-0.28762
NDOR1	6	0.030518	0.081877	0.994977	1782	2	-0.036703	0.3019	0.41408	1	8908	1	-0.036703
KIF2B	6	0.030554	0.081938	0.994977	1783	3	-0.54716	0.68229	0.68377	1	14678	1	-0.54716
CHRD	6	0.030561	0.081945	0.994977	1784	2	0.62711	0.078083	0.16106	0.981349	3553	3	0.62711
MYH7B	6	0.030581	0.081985	0.994977	1785	3	-0.32271	0.98794	0.98783	1	21304	0	-0.32271
TRAK2	6	0.030624	0.082072	0.995223	1786	3	-0.53061	0.89588	0.89569	1	19264	0	-0.53061
C4B_2	6	0.030651	0.082127	0.995223	1787	3	-0.31693	0.30815	0.42089	1	9047	2	-0.31693
MYOC	6	0.030665	0.082155	0.995223	1788	1	-0.2438	0.083548	0.17061	0.985034	3749	2	-0.2438
RCHY1	6	0.030714	0.082254	0.995223	1789	1	-0.096347	0.87592	0.87577	1	18830	0	-0.096347
RNF20	6	0.030727	0.082277	0.995223	1790	3	-0.34652	0.22641	0.33181	0.999387	7191	1	-0.34652
ARMC7	6	0.030754	0.082322	0.995223	1791	3	-0.8854	0.98932	0.98926	1	21350	0	-0.8854
MOB4	2	0.030774	0.082356	0.995223	1792	1	-0.50474	0.432	0.49885	1	10735	0	-0.50474
RBFOX1	6	0.030792	0.082401	0.995223	1793	3	-0.34567	0.16697	0.26773	0.993117	5816	1	-0.34567
UQCRB	6	0.030803	0.082418	0.995223	1794	3	-0.47652	0.7214	0.72131	1	15485	0	-0.47652
OR4M2	6	0.03084	0.082483	0.995389	1795	3	-0.28457	0.65248	0.65741	1	14107	1	-0.28457
NTF3	6	0.030861	0.082524	0.995389	1796	2	0.032312	0.87672	0.87658	1	18853	0	0.032312
ZNF205	6	0.030896	0.082595	0.995504	1797	3	-0.35625	0.98761	0.98749	1	21295	0	-0.35625
GGA2	6	0.03091	0.082625	0.995504	1798	1	-0.12366	0.82984	0.82967	1	17803	0	-0.12366
COASY	6	0.030959	0.082706	0.99585	1799	2	-0.11693	0.32734	0.43923	1	9404	1	-0.11693
CEBPZ	6	0.030979	0.082746	0.99585	1800	2	-0.4492	0.34193	0.44716	1	9584	1	-0.4492
POMGNT2	4	0.03103	0.082836	0.99638	1801	3	-0.44857	0.99483	0.9948	1	21484	0	-0.44857
PPP1R3C	6	0.031059	0.082882	0.996382	1802	2	-0.21028	0.97903	0.97886	1	21087	0	-0.21028
KRTAP10-8	6	0.031106	0.082972	0.996911	1803	2	-0.10898	0.90554	0.90544	1	19492	0	-0.10898
NDST2	6	0.031154	0.083066	0.996967	1804	3	-0.16567	0.069281	0.14563	0.977122	3223	2	-0.16567
KLK12	6	0.031174	0.083101	0.996967	1805	3	-0.59756	0.41268	0.48736	1	10497	1	-0.59756
VPS16	6	0.031185	0.083121	0.996967	1806	3	-0.45919	0.88871	0.88854	1	19104	0	-0.45919
OR5B21	6	0.031203	0.083161	0.996967	1807	3	-0.15319	0.84034	0.84024	1	18032	0	-0.15319
CDC42	6	0.031239	0.083233	0.997281	1808	2	-0.11844	0.64428	0.65039	1	13964	1	-0.11844
OR1S2	6	0.031289	0.083315	0.997432	1809	3	-0.30257	0.52398	0.55852	1	12037	1	-0.30257
POPDC2	6	0.031301	0.083338	0.997432	1810	1	0.50585	0.10663	0.1996	0.990737	4361	2	0.50585
MRPL17	6	0.031355	0.083447	0.998182	1811	3	-0.5387	0.66231	0.66601	1	14292	1	-0.5387
KIR2DL1	6	0.03142	0.083572	0.998277	1812	3	-0.14789	0.092286	0.18327	0.988043	4016	2	-0.14789
PIK3R2	6	0.031448	0.083626	0.998277	1813	3	-0.43022	0.94253	0.94261	1	20246	0	-0.43022
POLR3H	6	0.0315	0.083722	0.998277	1814	3	-0.4208	0.31776	0.43161	1	9254	1	-0.4208
hsa-mir-544a	4	0.031546	0.083793	0.998277	1815	3	-0.45261	0.99603	0.99602	1	21518	0	-0.45261
PTGDS	6	0.031546	0.083794	0.998277	1816	2	0.16369	0.44048	0.50403	1	10841	1	0.16369
DERL2	6	0.031595	0.083886	0.998277	1817	2	0.039817	0.63221	0.64027	1	13749	1	0.039817
TIMM21	6	0.031644	0.08398	0.998277	1818	2	0.7551	0.049335	0.10948	0.967059	2443	3	0.7551
NACC1	6	0.031646	0.083984	0.998277	1819	3	-0.3949	0.29203	0.40323	1	8697	2	-0.3949
KRTAP26-1	6	0.031692	0.084064	0.998277	1820	2	-0.024802	0.86908	0.86907	1	18666	0	-0.024802
SUPT4H1	6	0.031692	0.084064	0.998277	1821	3	-0.051395	0.65827	0.66245	1	14215	1	-0.051395
RPL15	6	0.031707	0.08409	0.998277	1822	3	-0.46576	0.93764	0.93768	1	20145	0	-0.46576
PLA2G4A	6	0.031741	0.08415	0.998277	1823	2	-0.33928	0.14715	0.24528	0.993117	5345	2	-0.33928
GPR20	6	0.031752	0.084165	0.998277	1824	2	0.078661	0.50189	0.54348	1	11724	1	0.078661
hsa-mir-6824	4	0.031761	0.084182	0.998277	1825	3	-0.72239	0.37191	0.46365	1	9971	1	-0.72239
TMEM120A	6	0.031773	0.084206	0.998277	1826	3	-0.36903	0.3799	0.46823	1	10065	1	-0.36903
JHDM1D	6	0.031784	0.084226	0.998277	1827	3	-0.32275	0.83182	0.83168	1	17843	0	-0.32275
SPANXC	1	0.031814	0.084279	0.998277	1828	1	-0.79634	0.96819	0.9681	1	20840	0	-0.79634
NonTargetingControlGuideForHuman_0008	1	0.031839	0.08433	0.998277	1829	1	-1.0792	0.96816	0.96807	1	20838	0	-1.0792
LIAS	6	0.031839	0.08433	0.998277	1830	1	0.59655	0.25411	0.36192	0.999909	7835	2	0.59655
TTI2	6	0.031917	0.084475	0.999338	1831	3	-0.35079	0.98812	0.98802	1	21310	0	-0.35079
FBXW9	6	0.031934	0.084512	0.999338	1832	3	-0.11095	0.16364	0.26404	0.993117	5746	2	-0.11095
DOLPP1	6	0.031975	0.084597	0.999668	1833	2	-0.35338	0.91712	0.91719	1	19733	0	-0.35338
CLEC17A	6	0.032025	0.084706	0.999668	1834	2	-0.14762	0.51126	0.54983	1	11853	1	-0.14762
TMEM107	6	0.032035	0.084724	0.999668	1835	3	-0.26225	0.4467	0.50787	1	10937	1	-0.26225
UBE2M	6	0.032035	0.084725	0.999668	1836	2	-0.4794	0.030812	0.074898	0.96338	1684	1	-0.4794
ZDHHC2	6	0.032106	0.084869	0.999988	1837	2	-0.11103	0.11881	0.21327	0.992328	4630	2	-0.11103
ZNF611	5	0.032162	0.084971	0.999988	1838	1	0.82575	0.22269	0.32777	0.999387	7090	2	0.82575
EFNB3	6	0.032198	0.085045	0.999988	1839	2	0.066271	0.020194	0.054465	0.941004	1252	2	0.066271
C11orf70	6	0.03223	0.085105	0.999988	1840	2	-0.048114	0.82946	0.82929	1	17797	0	-0.048114
hsa-mir-4754	4	0.032232	0.085108	0.999988	1841	2	-0.48846	0.010921	0.033201	0.915126	762	1	-0.48846
GALNT3	6	0.032259	0.085157	0.999988	1842	2	-0.083321	0.26396	0.37267	1	8062	2	-0.083321
EXOC6	6	0.032269	0.085171	0.999988	1843	2	0.05111	0.70899	0.709	1	15218	1	0.05111
MSRB1	6	0.032279	0.08519	0.999988	1844	3	-0.54676	0.98858	0.98849	1	21330	0	-0.54676
hsa-mir-5703	4	0.032304	0.085243	0.999988	1845	2	-0.76817	0.87225	0.87215	1	18736	0	-0.76817
RPL30	6	0.03237	0.085367	0.999988	1846	2	-0.1498	0.49873	0.54142	1	11673	1	-0.1498
hsa-mir-3622a	4	0.032377	0.085376	0.999988	1847	3	-0.37958	0.98708	0.98694	1	21284	0	-0.37958
TMEM184A	6	0.032426	0.085463	0.999988	1848	3	-0.12501	0.12584	0.22118	0.992328	4794	2	-0.12501
PHC3	6	0.032525	0.085668	0.999988	1849	3	-0.36532	0.21236	0.31669	0.998581	6867	1	-0.36532
ARHGEF38	6	0.032564	0.085758	0.999988	1850	2	-0.38596	0.81292	0.81277	1	17435	0	-0.38596
SERPINF1	6	0.032572	0.085778	0.999988	1851	3	-0.39533	0.96875	0.96866	1	20849	0	-0.39533
ACE	6	0.032621	0.085868	0.999988	1852	1	0.2444	0.20612	0.30993	0.996432	6737	2	0.2444
hsa-mir-4650-1	4	0.032676	0.085978	0.999988	1853	2	-0.53208	0.57147	0.59258	1	12749	0	-0.53208
NVL	6	0.032697	0.086025	0.999988	1854	2	-0.057871	0.050861	0.11228	0.970402	2506	3	-0.057871
FAM184B	6	0.032716	0.086062	0.999988	1855	3	-0.081901	0.13351	0.2298	0.992328	4975	2	-0.081901
IL15RA	6	0.032719	0.086069	0.999988	1856	2	0.17603	0.11603	0.21013	0.992328	4578	1	0.17603
HIC2	6	0.032768	0.086162	0.999988	1857	2	0.20534	0.0078346	0.024501	0.915126	565	2	0.20534
SEPHS2	6	0.032789	0.086213	0.999988	1858	3	-0.44645	0.89443	0.89426	1	19236	0	-0.44645
SLC35D2	6	0.032809	0.08625	0.999988	1859	2	-0.33275	0.011123	0.033748	0.915126	775	1	-0.33275
GRIN3B	6	0.032817	0.086265	0.999988	1860	1	0.45965	0.35529	0.4544	1	9755	1	0.45965
LOC100289561	6	0.032822	0.086282	0.999988	1861	3	-0.24528	0.22849	0.33407	0.999645	7233	2	-0.24528
ANAPC11	6	0.03285	0.086333	0.999988	1862	2	-0.10535	0.17344	0.27458	0.993117	5968	2	-0.10535
RNF167	6	0.03286	0.086344	0.999988	1863	2	0.1412	0.69277	0.69351	1	14902	1	0.1412
NRD1	6	0.03293	0.086477	0.999988	1864	3	-0.68644	0.99921	0.99919	1	21613	0	-0.68644
CAB39	6	0.032941	0.086498	0.999988	1865	3	0.29697	0.054968	0.11972	0.971674	2665	3	0.29697
KCNH1	6	0.033004	0.086605	0.999988	1866	3	-0.41254	0.91471	0.91473	1	19667	0	-0.41254
SLC35C1	6	0.033012	0.08662	0.999988	1867	1	0.6381	0.0079463	0.024823	0.915126	571	3	0.6381
TESC	6	0.033035	0.086658	0.999988	1868	2	0.21545	0.13324	0.22949	0.992328	4968	2	0.21545
CLRN1	6	0.033061	0.086707	0.999988	1869	1	0.38599	0.25405	0.36185	0.999909	7832	2	0.38599
WEE1	6	0.033218	0.087017	0.999988	1870	3	-0.68236	0.90867	0.9086	1	19549	0	-0.68236
FAM136A	6	0.033256	0.087086	0.999988	1871	2	-0.35024	0.49397	0.53816	1	11597	1	-0.35024
GSK3A	6	0.033264	0.087099	0.999988	1872	3	-0.39834	0.83651	0.83641	1	17948	0	-0.39834
hsa-mir-210	4	0.033283	0.087137	0.999988	1873	2	-0.56736	0.34423	0.44839	1	9614	1	-0.56736
hsa-mir-3611	1	0.033287	0.087145	0.999988	1874	1	-4.244	0.96671	0.96666	1	20801	0	-4.244
LIN7C	6	0.033298	0.087167	0.999988	1875	3	-0.11916	0.066415	0.14053	0.977122	3104	2	-0.11916
IGF1R	6	0.033377	0.087309	0.999988	1876	3	-0.43651	0.54704	0.57469	1	12354	1	-0.43651
DNAH11	6	0.033395	0.087343	0.999988	1877	2	0.20848	0.023475	0.060999	0.94478	1397	2	0.20848
MORN5	6	0.033403	0.087359	0.999988	1878	1	0.0015006	0.53329	0.56501	1	12161	1	0.0015006
MBL2	6	0.033436	0.087423	0.999988	1879	2	0.038483	0.85259	0.85258	1	18304	0	0.038483
RRAGA	6	0.033474	0.087497	0.999988	1880	3	-0.70078	0.66841	0.67131	1	14399	1	-0.70078
CTDSP2	6	0.0335	0.087543	0.999988	1881	1	0.65754	0.65273	0.65763	1	14112	1	0.65754
TF	6	0.033518	0.087578	0.999988	1882	2	-0.21719	0.77849	0.77834	1	16689	0	-0.21719
COG4	6	0.033549	0.087644	0.999988	1883	3	-0.77623	0.98962	0.98955	1	21354	0	-0.77623
CSTF1	6	0.033598	0.087733	0.999988	1884	2	0.69026	0.59164	0.60791	1	13061	1	0.69026
TTC29	6	0.0336	0.087735	0.999988	1885	3	-0.43814	0.27023	0.37955	1	8203	1	-0.43814
RGPD6	2	0.033606	0.087746	0.999988	1886	2	-1.4752	0.96639	0.96633	1	20791	0	-1.4752
C19orf60	6	0.033647	0.087821	0.999988	1887	1	0.11134	0.82898	0.82882	1	17787	0	0.11134
DMRT3	6	0.033653	0.087835	0.999988	1888	2	0.32019	0.13222	0.22836	0.992328	4948	2	0.32019
NCOA4	6	0.033694	0.087924	0.999988	1889	2	0.080935	0.50079	0.54277	1	11704	1	0.080935
ATP2A2	6	0.033695	0.087927	0.999988	1890	3	-0.4794	0.34445	0.4485	1	9619	1	-0.4794
RGL2	6	0.033725	0.087975	0.999988	1891	3	-0.22647	0.40948	0.48546	1	10454	1	-0.22647
SUMO3	6	0.033735	0.087996	0.999988	1892	2	0.097902	0.010078	0.030805	0.915126	710	1	0.097902
TPRX1	6	0.033742	0.088006	0.999988	1893	3	-0.32013	0.11076	0.20422	0.990864	4462	2	-0.32013
LILRA2	6	0.033818	0.088132	0.999988	1894	2	0.33796	0.22284	0.32793	0.999387	7095	1	0.33796
MRPL43	6	0.033834	0.088166	0.999988	1895	3	-0.60624	0.3803	0.46845	1	10068	1	-0.60624
hsa-mir-219b	4	0.033898	0.088276	0.999988	1896	3	-0.45294	0.87659	0.87645	1	18849	0	-0.45294
hsa-mir-604	4	0.033923	0.088331	0.999988	1897	2	-0.38994	0.81434	0.8142	1	17473	0	-0.38994
KIAA0430	6	0.033932	0.088353	0.999988	1898	3	-0.32553	0.93979	0.93981	1	20188	0	-0.32553
ZNF653	6	0.033937	0.088363	0.999988	1899	3	-0.63842	0.69371	0.6944	1	14922	1	-0.63842
EEF2K	6	0.033939	0.088366	0.999988	1900	2	0.38616	0.062006	0.13258	0.976213	2930	3	0.38616
H2AFB3	1	0.03394	0.088367	0.999988	1901	1	-0.95895	0.96606	0.96598	1	20781	0	-0.95895
hsa-mir-665	4	0.033977	0.08843	0.999988	1902	2	-0.2403	0.7412	0.74102	1	15895	0	-0.2403
IFI30	6	0.033988	0.088452	0.999988	1903	3	-0.63732	0.33528	0.44351	1	9492	1	-0.63732
TOX2	6	0.034086	0.088624	0.999988	1904	2	-0.021392	0.95479	0.95477	1	20513	0	-0.021392
IFLTD1	6	0.034127	0.088697	0.999988	1905	3	-1.0188	0.8284	0.82825	1	17778	0	-1.0188
C3orf36	6	0.034183	0.088791	0.999988	1906	2	-0.15834	0.15913	0.25898	0.993117	5643	2	-0.15834
RALBP1	6	0.034224	0.088861	0.999988	1907	2	0.11705	0.23179	0.33773	0.999833	7311	1	0.11705
RPL7L1	6	0.034232	0.088877	0.999988	1908	1	-0.21328	0.94259	0.94267	1	20249	0	-0.21328
C9orf64	6	0.034266	0.088942	0.999988	1909	3	-0.63881	0.57552	0.5956	1	12805	1	-0.63881
CCT5	6	0.034281	0.088977	0.999988	1910	3	-0.51994	0.45272	0.51163	1	11008	1	-0.51994
GALNT18	6	0.034317	0.089046	0.999988	1911	2	0.13518	0.90579	0.90569	1	19500	0	0.13518
GLS2	6	0.03433	0.089073	0.999988	1912	1	0.42742	0.083647	0.17078	0.985034	3753	3	0.42742
SLC25A28	6	0.034335	0.089085	0.999988	1913	3	-1.1541	0.98002	0.97986	1	21116	0	-1.1541
ZNF768	6	0.034411	0.089237	0.999988	1914	2	-0.24806	0.24647	0.35359	0.999909	7650	2	-0.24806
TENM1	6	0.034462	0.089333	0.999988	1915	3	-0.32394	0.76352	0.76334	1	16359	0	-0.32394
DHX33	6	0.034463	0.089335	0.999988	1916	3	-0.83608	0.94499	0.9451	1	20292	0	-0.83608
LANCL1	6	0.034476	0.089361	0.999988	1917	3	-0.47711	0.26927	0.37852	1	8181	2	-0.47711
hsa-mir-513c	4	0.034492	0.089389	0.999988	1918	2	-0.51514	0.78126	0.7811	1	16750	0	-0.51514
RPL18A	6	0.034495	0.089393	0.999988	1919	3	-0.56403	0.44057	0.50409	1	10843	1	-0.56403
SLC25A53	6	0.034525	0.089452	0.999988	1920	3	-0.2965	0.91051	0.91046	1	19586	0	-0.2965
ASPRV1	6	0.034532	0.089467	0.999988	1921	3	-0.51214	0.99375	0.99369	1	21463	0	-0.51214
hsa-mir-7704	4	0.03454	0.089483	0.999988	1922	2	-0.62752	0.59418	0.60981	1	13092	0	-0.62752
POLR2K	6	0.034544	0.089488	0.999988	1923	3	-0.652	0.98612	0.986	1	21257	0	-0.652
PCDHB6	6	0.034568	0.089532	0.999988	1924	3	-0.22785	0.39479	0.4768	1	10254	1	-0.22785
C20orf112	6	0.034574	0.08954	0.999988	1925	2	-0.0067374	0.71474	0.71462	1	15333	1	-0.0067374
USPL1	6	0.034578	0.089547	0.999988	1926	2	-0.11526	0.8659	0.8659	1	18599	0	-0.11526
CEP164	6	0.034623	0.089627	0.999988	1927	3	-0.38494	0.93888	0.9389	1	20167	0	-0.38494
C4orf22	6	0.034625	0.089634	0.999988	1928	3	-0.10902	0.87152	0.87144	1	18724	0	-0.10902
PRRC2C	6	0.034631	0.089647	0.999988	1929	3	-0.3487	0.47315	0.52461	1	11302	1	-0.3487
TMED3	6	0.034641	0.089663	0.999988	1930	2	-0.31563	0.96173	0.9616	1	20685	0	-0.31563
NDUFV1	6	0.034701	0.089776	0.999988	1931	3	-0.54553	0.79806	0.79788	1	17123	0	-0.54553
DDA1	4	0.034713	0.089801	0.999988	1932	2	-0.6359	0.85559	0.85556	1	18383	0	-0.6359
STX1B	6	0.034724	0.08982	0.999988	1933	3	-0.55231	0.96907	0.96897	1	20859	0	-0.55231
HYAL4	6	0.034741	0.089852	0.999988	1934	3	-0.44049	0.92264	0.92274	1	19840	0	-0.44049
ZNF174	6	0.034805	0.089971	0.999988	1935	3	-0.22792	0.94352	0.9436	1	20266	0	-0.22792
SH3YL1	6	0.034811	0.089982	0.999988	1936	3	-0.22134	0.79761	0.79743	1	17112	0	-0.22134
MVP	6	0.034818	0.089999	0.999988	1937	2	-0.05698	0.28736	0.39815	1	8583	2	-0.05698
MLLT11	6	0.034861	0.090078	0.999988	1938	2	-0.062638	0.92821	0.92831	1	19954	0	-0.062638
DDX6	6	0.034914	0.09017	0.999988	1939	3	-0.47709	0.86732	0.86732	1	18632	0	-0.47709
SPNS2	6	0.034915	0.090174	0.999988	1940	1	0.31173	0.50105	0.54293	1	11708	1	0.31173
HAUS2	6	0.034928	0.090193	0.999988	1941	3	-0.5653	0.71666	0.71657	1	15376	1	-0.5653
RWDD4	6	0.034977	0.090281	0.999988	1942	2	-0.31435	0.31659	0.43033	1	9225	1	-0.31435
NUP62	6	0.035013	0.09034	0.999988	1943	2	-0.023305	0.63441	0.64206	1	13784	1	-0.023305
NonTargetingControlGuideForHuman_0404	1	0.03502	0.090351	0.999988	1944	1	-0.84979	0.96498	0.96491	1	20761	0	-0.84979
SRBD1	6	0.03503	0.090371	0.999988	1945	2	-0.36518	0.90728	0.9072	1	19529	0	-0.36518
hsa-mir-4514	4	0.035047	0.090395	0.999988	1946	3	-0.66417	0.95127	0.95129	1	20428	0	-0.66417
MPP1	6	0.035061	0.090422	0.999988	1947	3	-0.22271	0.73054	0.73036	1	15677	0	-0.22271
hsa-mir-1470	4	0.035085	0.090469	0.999988	1948	3	-0.63923	0.32406	0.43745	1	9369	1	-0.63923
WDR5	6	0.035092	0.090483	0.999988	1949	3	-0.64801	0.94118	0.94125	1	20219	0	-0.64801
CHM	6	0.035103	0.090502	0.999988	1950	3	-0.47808	0.075721	0.15694	0.979789	3470	1	-0.47808
ACER3	6	0.03511	0.090519	0.999988	1951	2	-0.11381	0.92992	0.92998	1	19988	0	-0.11381
ZNF747	6	0.035115	0.090526	0.999988	1952	3	-1.0436	0.32893	0.44012	1	9418	1	-1.0436
OR6Q1	6	0.035133	0.09056	0.999988	1953	3	-0.19044	0.20565	0.30944	0.996432	6723	2	-0.19044
KIAA1033	6	0.035168	0.090632	0.999988	1954	3	-0.29264	0.97465	0.97454	1	20984	0	-0.29264
POLE	6	0.035221	0.090736	0.999988	1955	3	-0.33735	0.18632	0.28844	0.993689	6286	1	-0.33735
CHMP6	6	0.035256	0.090802	0.999988	1956	2	-0.47267	0.32492	0.43792	1	9378	1	-0.47267
hsa-mir-6747	4	0.035272	0.090828	0.999988	1957	2	-0.69484	0.95676	0.95672	1	20557	0	-0.69484
SPTLC2	6	0.035282	0.090846	0.999988	1958	3	-0.51096	0.60535	0.61851	1	13272	1	-0.51096
SLC35F3	6	0.035356	0.090986	0.999988	1959	2	-0.20429	0.39383	0.47625	1	10240	1	-0.20429
TOP3A	6	0.035432	0.091128	0.999988	1960	3	-0.72978	0.60793	0.62059	1	13322	1	-0.72978
IFNA4	5	0.035509	0.091255	0.999988	1961	2	-0.43212	0.68203	0.68353	1	14674	0	-0.43212
WDR74	6	0.035538	0.0913	0.999988	1962	3	-1.2481	0.27447	0.38417	1	8315	1	-1.2481
TBC1D20	6	0.035549	0.091322	0.999988	1963	3	-0.24675	0.90943	0.90935	1	19566	0	-0.24675
TDRD12	6	0.035568	0.091357	0.999988	1964	3	-0.012297	0.77794	0.7778	1	16672	0	-0.012297
SLC4A4	6	0.035598	0.091415	0.999988	1965	1	0.096952	0.8746	0.87447	1	18803	0	0.096952
GPR119	6	0.035599	0.091418	0.999988	1966	2	0.078727	0.47295	0.52449	1	11301	1	0.078727
SOCS5	6	0.035646	0.091497	0.999988	1967	1	-0.12738	0.51448	0.55202	1	11897	1	-0.12738
FAM115C	6	0.035841	0.091853	0.999988	1968	1	-0.013448	0.24341	0.35031	0.999909	7580	1	-0.013448
SSSCA1	6	0.035843	0.091857	0.999988	1969	3	0.070247	0.052979	0.11613	0.970452	2583	3	0.070247
hsa-mir-548j	4	0.035887	0.091936	0.999988	1970	1	-0.23935	0.65616	0.66064	1	14176	0	-0.23935
CSK	6	0.03589	0.091942	0.999988	1971	2	-0.2221	0.92154	0.92162	1	19813	0	-0.2221
WTAP	5	0.035894	0.09195	0.999988	1972	2	-0.14372	0.7966	0.79641	1	17087	0	-0.14372
hsa-mir-876	4	0.035919	0.092	0.999988	1973	1	0.1338	0.83615	0.83608	1	17939	0	0.1338
METTL1	6	0.035928	0.092018	0.999988	1974	2	-0.12042	0.68136	0.68295	1	14656	1	-0.12042
NRP1	6	0.035939	0.092034	0.999988	1975	2	-0.10576	0.90332	0.90317	1	19429	0	-0.10576
GDPD3	6	0.035982	0.092112	0.999988	1976	2	-0.26836	0.94734	0.94743	1	20345	0	-0.26836
RNF213	6	0.035987	0.092125	0.999988	1977	3	-0.09322	0.20918	0.31326	0.998581	6791	2	-0.09322
DPP4	6	0.036036	0.092203	0.999988	1978	2	-0.99205	0.095578	0.18704	0.988234	4094	2	-0.99205
BRICD5	6	0.036085	0.092287	0.999988	1979	1	0.39778	0.21695	0.32157	0.999387	6964	2	0.39778
TTF2	6	0.036107	0.09233	0.999988	1980	3	-0.29255	0.50804	0.54767	1	11799	1	-0.29255
hsa-mir-4649	4	0.036115	0.092344	0.999988	1981	2	-0.56735	0.87826	0.8781	1	18887	0	-0.56735
TTBK2	6	0.03612	0.092352	0.999988	1982	2	0.099294	0.77374	0.77357	1	16565	0	0.099294
BET1L	6	0.036133	0.092377	0.999988	1983	2	0.26025	0.044046	0.099794	0.96338	2239	2	0.26025
STON1	6	0.036167	0.092449	0.999988	1984	3	-0.27471	0.18799	0.29024	0.993954	6325	2	-0.27471
EMC1	6	0.036173	0.092465	0.999988	1985	2	-0.47787	0.92347	0.92358	1	19850	0	-0.47787
TPD52L3	6	0.036178	0.092471	0.999988	1986	3	-0.45946	0.069069	0.14525	0.977122	3213	1	-0.45946
FCRL3	6	0.036205	0.092521	0.999988	1987	2	0.025615	0.20858	0.31259	0.998581	6778	2	0.025615
ATP5J2-PTCD1	5	0.036222	0.092555	0.999988	1988	3	-0.62716	0.98871	0.98862	1	21334	0	-0.62716
PIAS1	6	0.03628	0.092661	0.999988	1989	3	-0.60289	0.92658	0.92667	1	19912	0	-0.60289
MYO1D	6	0.03628	0.092661	0.999988	1990	3	-0.3882	0.87529	0.87515	1	18818	0	-0.3882
ZIC2	6	0.036312	0.09272	0.999988	1991	3	-0.56915	0.65987	0.66383	1	14245	1	-0.56915
UBL5	6	0.036323	0.092737	0.999988	1992	2	-0.51237	0.75192	0.75174	1	16125	0	-0.51237
CTSA	6	0.036328	0.092749	0.999988	1993	2	-0.20022	0.24881	0.35611	0.999909	7701	1	-0.20022
YIPF7	6	0.036346	0.092777	0.999988	1994	3	-0.31491	0.52824	0.56144	1	12093	1	-0.31491
MRPL18	6	0.036423	0.092916	0.999988	1995	3	-0.41348	0.94082	0.94088	1	20213	0	-0.41348
HES2	6	0.036426	0.09292	0.999988	1996	1	-0.19966	0.19382	0.29667	0.994216	6450	1	-0.19966
SBSN	6	0.036465	0.092994	0.999988	1997	3	-0.36172	0.98551	0.98539	1	21243	0	-0.36172
hsa-mir-4703	1	0.036493	0.093043	0.999988	1998	1	-3.4096	0.96351	0.9634	1	20726	0	-3.4096
SYNGR3	6	0.036525	0.0931	0.999988	1999	3	-0.52687	0.2001	0.30338	0.99442	6609	2	-0.52687
[truncated: 19,664 more rows]

## Sheet: LP-depl_gRNA
sgrna	Gene	control_count	treatment_count	control_mean	treat_mean	LFC	control_var	adj_var	score	p.low	p.high	p.twosided	FDR	high_in_treatment
HGLibA_50036	TMEM165	906.02/993.6/1169.4	44.726/29.625/29.764	1017.3	34.04	-4.861	18044	65549	3.8404	2.5984e-05	0.99997	5.1968e-05	0.0023139	FALSE
HGLibB_11370	CSNK1A1	584.24/524.53/794.79	1.1468/46.659/25.796	624.51	11.372	-5.6599	20306	40241	3.0565	0.00019448	0.99981	0.00038895	0.013421	FALSE
HGLibB_50300	TMEM30A	342.33/208.68/247.23	0/19.997/0	260.42	0.48574	-7.4591	4779.5	16781	2.0066	0.00020355	0.9998	0.0004071	0.013995	FALSE
HGLibB_30272	MTA2	244.19/162.62/183.53	8.0277/0/0	193.88	0.33317	-7.1916	1807.7	12493	1.7317	0.00027627	0.99972	0.00055254	0.018113	FALSE
HGLibA_52325	TUFM	75.312/85.542/110.72	0/0/0	89.351	0	-6.4975	334.21	5757.4	1.1776	0.00030869	0.99969	0.00061737	0.019944	FALSE
HGLibB_14845	EIF6	49.067/57.341/244.96	0/0/0	88.355	0	-6.4815	13515	5693.2	1.171	0.0003133	0.99969	0.0006266	0.020187	FALSE
HGLibA_18432	GAGE1	1783.5/1740/1889.9	677.76/676.18/591.32	1803.4	647.13	-1.4772	5949.7	116200	3.3919	0.00034696	0.99965	0.00069392	0.021989	FALSE
HGLibB_50882	TOM1	131.23/58.281/59.912	0/0/0	77.101	0	-6.2873	1789.5	4968	1.0939	0.00037287	0.99963	0.00074573	0.023358	FALSE
HGLibB_09619	CHST15	93.569/58.281/64.463	0/0/0	70.578	0	-6.1614	358.6	4547.7	1.0466	0.00041507	0.99958	0.00083013	0.025638	FALSE
HGLibB_18405	GAGE1	1718.5/1850/1614.6	558.5/584.35/702.44	1725	612.02	-1.4934	13922	111150	3.3383	0.00042129	0.99958	0.00084258	0.025956	FALSE
HGLibB_31242	NCBP2	55.913/119.38/38.678	0/0/0	63.686	0	-6.0154	1894	4103.6	0.99417	0.00046777	0.99953	0.00093554	0.028408	FALSE
HGLibB_49941	TMEM151A	58.195/60.161/69.771	0/0/0	62.512	0	-5.989	38.428	4028	0.98496	0.00047774	0.99952	0.00095549	0.028898	FALSE
HGLibB_34188	OR5A2	61.619/30.081/116.03	0/0/0	59.93	0	-5.9291	2020.7	3861.6	0.9644	0.00050085	0.9995	0.0010017	0.030029	FALSE
HGLibB_43660	SF3B4	47.926/59.221/57.637	0/0/0	54.691	0	-5.7994	37.485	3524.1	0.92129	0.00055337	0.99945	0.0011067	0.03275	FALSE
HGLibA_50829	TNFSF9	83.299/44.181/42.47	0/0/0	53.871	0	-5.778	544.96	3471.2	0.91435	0.00056237	0.99944	0.0011247	0.033143	FALSE
HGLibA_15433	ERCC2	104.98/64.861/97.073	0/2.2219/0	87.111	0.18528	-6.216	456.8	5613.1	1.1602	0.00057273	0.99943	0.0011455	0.033704	FALSE
HGLibA_01610	ALG11	114.11/28.201/43.986	0/0/0	52.132	0	-5.7315	2240.1	3359.1	0.89947	0.00058224	0.99942	0.0011645	0.034188	FALSE
HGLibB_26902	LOC440243	35.374/22.56/169.12	0/0/0	51.329	0	-5.7095	7478.4	3307.4	0.89252	0.00059178	0.99941	0.0011836	0.034646	FALSE
HGLibA_40901	RFC1	33.092/58.281/66.738	0/0/0	50.495	0	-5.6864	313.67	3253.7	0.88524	0.00060197	0.9994	0.0012039	0.035139	FALSE
HGLibB_36416	PHTF1	77.594/27.261/53.845	0/0/0	48.483	0	-5.6289	663.29	3124.1	0.86743	0.00062774	0.99937	0.0012555	0.036456	FALSE
HGLibA_20589	GTF3C4	73.03/74.261/99.348	2.2936/0/0	81.373	0.18819	-6.1153	221.65	5243.3	1.1212	0.00063516	0.99936	0.0012703	0.036824	FALSE
HGLibB_54894	ZC3H13	42.22/41.361/45.503	0/0/0	42.992	0	-5.4592	4.7809	2770.2	0.81683	0.00070807	0.99929	0.0014161	0.04056	FALSE
HGLibA_59626	hsa-mir-3941	50.208/30.081/45.503	0/0/0	40.963	0	-5.3911	112.25	2639.5	0.79732	0.00074216	0.99926	0.0014843	0.042289	FALSE
HGLibB_40138	RAN	39.938/40.421/37.919	0/0/0	39.411	0	-5.3367	1.7615	2539.5	0.78207	0.00077016	0.99923	0.0015403	0.043666	FALSE
HGLibB_37561	POLR3A	51.349/21.62/52.328	0/0/0	38.739	0	-5.3125	318.36	2496.2	0.77538	0.00078284	0.99922	0.0015657	0.044227	FALSE
HGLibA_54758	YY1	15.975/36.661/97.832	0/0/0	38.58	0	-5.3067	2012.7	2485.9	0.77378	0.0007859	0.99921	0.0015718	0.044379	FALSE
HGLibA_21847	HNRNPU	43.361/44.181/27.302	0/0/0	37.4	0	-5.263	91.745	2409.9	0.76186	0.00080921	0.99919	0.0016184	0.045459	FALSE
HGLibA_45931	SNN	35.374/18.8/72.805	0/0/0	36.463	0	-5.2274	816.94	2349.5	0.75225	0.00082859	0.99917	0.0016572	0.046406	FALSE
HGLibA_38024	PPP1R12B	33.092/20.68/63.704	0/0/0	35.206	0	-5.1781	513.81	2268.5	0.73917	0.0008559	0.99914	0.0017118	0.04769	FALSE
HGLibA_63121	hsa-mir-6742	19.398/25.38/77.355	0/0/0	33.661	0	-5.1153	1090.6	2169	0.72277	0.00089166	0.99911	0.0017833	0.049314	FALSE
HGLibB_24331	KCNQ1	22.822/14.1/116.79	0/0/0	33.534	0	-5.1099	3712.1	2160.8	0.7214	0.00089474	0.99911	0.0017895	0.049438	FALSE
HGLibA_57282	hsa-mir-1207	21.681/38.541/44.745	0/0/0	33.444	0	-5.1062	146.03	2155	0.72043	0.00089692	0.9991	0.0017938	0.049536	FALSE
HGLibA_42917	SCGB1D2	36.515/28.201/34.127	0/0/0	32.755	0	-5.0771	18.381	2110.6	0.71298	0.00091389	0.99909	0.0018278	0.05024	FALSE
HGLibB_50636	TMX4	30.809/36.661/31.094	0/0/0	32.748	0	-5.0767	10.902	2110.2	0.71291	0.00091407	0.99909	0.0018281	0.05024	FALSE
HGLibA_18395	GABRG3	28.527/48.881/24.268	0/0.74062/0	32.35	0.10333	-4.9177	176.6	2084.5	0.70629	0.00092417	0.99908	0.0018483	0.050701	FALSE
HGLibA_36140	PFDN2	193.98/136.3/85.697	29.817/0/0	131.35	0.56882	-6.3985	3015.9	8463.7	1.4216	0.00096831	0.99903	0.0019366	0.052748	FALSE
HGLibA_26685	LMF1	130.08/103.4/152.44	0/28.144/0	127.04	0.5561	-6.3625	606.45	8186.1	1.398	0.00099895	0.999	0.0019979	0.054194	FALSE
HGLibA_07120	CAND1	65.042/23.5/16.684	0/0/0	29.45	0	-4.9284	732.57	1897.7	0.67606	0.0010041	0.999	0.0020082	0.054387	FALSE
HGLibA_09582	CHRNA7	23.963/22.56/45.503	0/0/0	29.088	0	-4.9111	169.17	1874.3	0.67188	0.001015	0.99899	0.0020299	0.054889	FALSE
HGLibA_13042	DGCR14	29.668/12.22/65.979	0/0/0	28.839	0	-4.8991	828.15	1858.2	0.669	0.0010226	0.99898	0.0020452	0.055288	FALSE
HGLibA_53696	VMP1	17.116/41.361/33.369	0/0/0	28.701	0	-4.8924	158.13	1849.4	0.6674	0.0010268	0.99897	0.0020537	0.055405	FALSE
HGLibB_14846	EIF6	30.809/15.04/42.47	0/0/0	27.009	0	-4.8078	198.36	1740.3	0.64742	0.0010818	0.99892	0.0021636	0.058147	FALSE
HGLibA_42781	SATL1	17.116/67.681/16.684	0/0/0	26.856	0	-4.7999	932.52	1730.5	0.64559	0.001087	0.99891	0.002174	0.058375	FALSE
HGLibA_29916	MRPL18	27.386/28.201/24.268	0/0/0	26.563	0	-4.7847	4.3124	1711.6	0.64206	0.0010972	0.9989	0.0021943	0.058854	FALSE
HGLibA_25336	KNCN	21.681/37.601/22.752	0/0/0	26.473	0	-4.78	80.32	1705.8	0.64097	0.0011003	0.9989	0.0022006	0.058997	FALSE
HGLibA_14589	EFNA3	35.374/57.341/30.335	0/1.4812/0	39.482	0.151	-5.1363	209.74	2544.1	0.77979	0.0011239	0.99888	0.0022478	0.060033	FALSE
HGLibA_24955	KIF5C	65.042/63.921/40.194	0/2.9625/0	55.084	0.21287	-5.5311	199.48	3549.3	0.92101	0.0011322	0.99887	0.0022645	0.060383	FALSE
HGLibA_39326	PTGES	4.5644/49.821/59.912	0/0/0	23.986	0	-4.6431	1167.7	1545.6	0.61013	0.0011948	0.99881	0.0023897	0.06327	FALSE
HGLibA_63614	hsa-mir-6859-2	98.134/57.341/34.127	0/3.7031/0	57.703	0.23629	-5.5694	1095.3	3718.1	0.94244	0.0011953	0.9988	0.0023907	0.063283	FALSE
HGLibB_10989	CPSF3	34.233/161.68/77.355	0/8.1468/0	75.391	0.33527	-5.8382	4572.1	4857.9	1.0769	0.0012459	0.99875	0.0024919	0.06556	FALSE
HGLibB_35639	PCSK7	45.644/85.542/219.93	0/0/16.866	95.07	0.4536	-6.0464	9062.1	6125.9	1.2089	0.0012498	0.99875	0.0024996	0.06573	FALSE
HGLibA_38125	PPP1R8	31.95/7.5201/45.503	0/0/0	22.232	0	-4.5381	426.21	1432.5	0.58739	0.0012713	0.99873	0.0025426	0.066713	FALSE
HGLibA_40519	RBM25	19.398/15.98/30.335	0/0/0	21.111	0	-4.4667	57.173	1360.3	0.57239	0.0013253	0.99867	0.0026507	0.069213	FALSE
HGLibB_52788	UFM1	26.245/18.8/18.96	0/0/0	21.072	0	-4.4641	18.191	1357.8	0.57186	0.0013273	0.99867	0.0026546	0.0693	FALSE
HGLibA_20898	HAVCR1	259.03/316.79/577.89	73.396/68.878/0	361.96	7.8736	-5.3541	29631	23323	2.3185	0.0013301	0.99867	0.0026602	0.069402	FALSE
HGLibB_00659	ACTR3	90.146/243.46/182.01	19.496/0.74062/0	158.68	1.081	-6.2617	6214.9	10225	1.5586	0.0013332	0.99867	0.0026664	0.069518	FALSE
HGLibA_24066	KAT7	51.349/90.242/235.86	26.377/0/0	103.03	0.54213	-6.0759	10239	6638.5	1.2578	0.0013361	0.99866	0.0026721	0.069652	FALSE
HGLibA_45629	SMARCD1	69.606/26.321/59.912	3.4404/0/0	47.89	0.22836	-5.3147	540.69	3085.8	0.85799	0.0014062	0.99859	0.0028125	0.072676	FALSE
HGLibA_14954	ELOF1	224.79/352.51/245.72	22.936/21.478/0	269.03	3.5768	-5.8826	4734.4	17335	2.0162	0.0014105	0.99859	0.002821	0.072858	FALSE
HGLibB_28547	MCHR1	82.158/140.06/97.832	0/31.847/0	104.03	0.58361	-6.0514	907.57	6703.3	1.2635	0.0014189	0.99858	0.0028379	0.073224	FALSE
HGLibA_13861	DPM2	95.851/0.94002/69.771	0/0/0	19.004	0	-4.3222	4404.5	1224.6	0.54308	0.00144	0.99856	0.00288	0.074164	FALSE
HGLibA_16473	FAM213B	36.515/8.4602/20.476	0/0/0	18.514	0	-4.2864	214.48	1193	0.53603	0.0014696	0.99853	0.0029391	0.075401	FALSE
HGLibB_31364	NDOR1	106.12/98.702/125.89	0/0/44.646	109.66	0.66487	-6.0546	198.04	7065.9	1.2966	0.0014983	0.9985	0.0029966	0.076619	FALSE
HGLibA_50110	TMEM184A	12.552/12.22/37.919	0/0/0	17.996	0	-4.2477	229.96	1159.6	0.52848	0.0015021	0.9985	0.0030042	0.076751	FALSE
HGLibA_48614	TBL1Y	19.398/9.4002/31.852	0/0/0	17.989	0	-4.2471	133.97	1159.1	0.52837	0.0015026	0.9985	0.0030052	0.076759	FALSE
HGLibA_61326	hsa-mir-483	12.552/57.341/117.55	3.4404/0/0	43.955	0.22836	-5.1937	3290.8	2832.2	0.82163	0.0015326	0.99847	0.0030652	0.077925	FALSE
HGLibB_31500	NDUFC2-KCTD14	96.992/106.22/94.798	0/37.031/0	99.217	0.61875	-5.9521	36.773	6393.1	1.2331	0.0016092	0.99839	0.0032183	0.081248	FALSE
HGLibB_08593	CDC73	89.005/51.701/118.31	19.496/0/0	81.66	0.48084	-5.8027	1147.3	5261.8	1.1191	0.0016193	0.99838	0.0032385	0.081619	FALSE
HGLibB_02692	ARGLU1	140.35/55.461/59.154	17.202/0/0	77.229	0.45723	-5.7464	2392.7	4976.3	1.0883	0.0016511	0.99835	0.0033021	0.082977	FALSE
HGLibB_50903	TOMM40	134.65/63.921/69.771	22.936/0/0	84.373	0.51301	-5.8183	1579.6	5436.6	1.1373	0.0016572	0.99834	0.0033144	0.0832	FALSE
HGLibB_38673	PRPF38A	77.594/78.021/63.704	0/14.812/0	72.79	0.43029	-5.689	66.499	4690.3	1.0566	0.00167	0.99833	0.0033399	0.083804	FALSE
HGLibB_15741	EXOC8	301.25/524.53/229.03	37.845/10.369/0.99214	330.78	7.4702	-5.2917	24382	21314	2.2145	0.0016809	0.99832	0.0033618	0.08423	FALSE
HGLibB_20498	GTF2A2	239.63/339.35/166.09	0/5.1843/65.481	238.15	3.1603	-5.8451	7718.1	15345	1.897	0.0016895	0.99831	0.003379	0.084517	FALSE
HGLibB_01770	AMER1	60.478/25.38/175.19	0/11.109/0	64.578	0.38216	-5.5682	6893.8	4161.1	0.99518	0.0017065	0.99829	0.0034129	0.085201	FALSE
HGLibA_41331	RIPPLY2	9.1287/42.301/38.678	0/1.4812/0	24.657	0.151	-4.4784	374.5	1588.8	0.61481	0.0017073	0.99829	0.0034145	0.08521	FALSE
HGLibA_42419	RTN4RL2	51.349/48.881/79.63	0/8.8874/0	58.47	0.34793	-5.4633	295.21	3767.6	0.94692	0.0017363	0.99826	0.0034727	0.086423	FALSE
HGLibB_50299	TMEM30A	46.785/172.02/122.86	0/45.918/0	99.641	0.67205	-5.9115	4286	6420.5	1.2351	0.0017381	0.99826	0.0034761	0.086423	FALSE
HGLibB_07283	CASKIN1	116.39/75.201/84.939	0/34.809/0	90.592	0.60412	-5.8354	467.2	5837.4	1.1778	0.0017788	0.99822	0.0035576	0.088199	FALSE
HGLibA_45135	SLC40A1	127.8/104.34/102.38	0/78.506/0	110.94	0.82289	-5.9403	200.56	7148.3	1.3024	0.0018251	0.99817	0.0036503	0.090003	FALSE
HGLibB_18858	GDI2	587.66/601.61/650.69	95.185/51.103/52.584	612.74	63.482	-3.2507	1096.7	39482	2.7642	0.0018326	0.99817	0.0036652	0.090296	FALSE
HGLibB_28777	MED8	167.74/47.001/109.97	0/47.4/0	95.368	0.68024	-5.8418	3895.1	6145.1	1.2079	0.0018696	0.99813	0.0037391	0.091796	FALSE
HGLibB_14733	EIF2S2	13.693/1.88/85.697	0/0/0	13.182	0	-3.826	2693.2	849.4	0.4523	0.0018947	0.99811	0.0037893	0.092743	FALSE
HGLibA_31344	NCOA4	50.208/75.201/107.69	0/0/22.819	74.089	0.51197	-5.6341	850.3	4774	1.0649	0.0019461	0.99805	0.0038922	0.09497	FALSE
HGLibA_34292	OR5H14	6.8465/9.4002/29.577	0/0/0	12.411	0	-3.7454	167.35	799.74	0.43888	0.0019786	0.99802	0.0039571	0.096395	FALSE
HGLibB_52450	UBA2	230.5/86.482/200.21	44.726/0/0.99214	158.63	1.598	-5.9412	6049.8	10222	1.5532	0.0019798	0.99802	0.0039595	0.096434	FALSE
HGLibA_06148	C2orf54	53.631/45.121/84.939	0/13.331/0	59.019	0.41212	-5.4095	447.02	3802.9	0.95036	0.0020366	0.99796	0.0040732	0.0987	FALSE
HGLibA_06840	CABIN1	134.65/86.482/67.496	53.9/0/0	92.29	0.71433	-5.766	1221.4	5946.7	1.1875	0.0020533	0.99795	0.0041066	0.099368	FALSE
HGLibA_07459	CBX6	35.374/45.121/153.19	16.055/0/0	62.55	0.44463	-5.4591	4629.3	4030.5	0.97826	0.0020598	0.99794	0.0041196	0.099651	FALSE
HGLibB_34553	ORAOV1	110.69/56.401/73.563	30.964/0/0	77.156	0.57725	-5.6309	783.96	4971.6	1.0861	0.0020889	0.99791	0.0041777	0.1008	FALSE
HGLibB_06136	C2orf49	67.324/42.301/106.93	20.643/0/0	67.286	0.49195	-5.5163	1098	4335.6	1.0144	0.0020967	0.9979	0.0041935	0.10112	FALSE
HGLibA_52200	TTLL3	68.465/28.201/35.644	0/5.9249/0	40.987	0.29203	-5.0222	473.55	2641	0.79187	0.0020994	0.9979	0.0041988	0.10122	FALSE
HGLibB_52541	UBE2G1	156.33/50.761/82.664	0/48.881/0	86.899	0.68827	-5.7022	3072.2	5599.4	1.1521	0.0021426	0.99786	0.0042853	0.103	FALSE
HGLibA_60129	hsa-mir-4435-1	109.54/31.021/62.187	0/15.553/0	59.578	0.43893	-5.3957	1659.5	3838.9	0.95448	0.0021471	0.99785	0.0042942	0.10315	FALSE
HGLibA_26785	LOC100130451	15.975/1.88/42.47	0/0/0	10.966	0	-3.5808	550.07	706.58	0.41253	0.0021597	0.99784	0.0043193	0.10365	FALSE
HGLibA_57831	hsa-mir-142	35.374/90.242/61.429	0/15.553/0	58.105	0.43893	-5.3602	780.27	3744	0.94243	0.0022071	0.99779	0.0044143	0.10551	FALSE
HGLibB_11307	CSE1L	55.913/28.201/106.17	13.762/0/0	55.129	0.41753	-5.3073	1665.7	3552.3	0.91797	0.0022224	0.99778	0.0044448	0.10615	FALSE
HGLibB_14368	ECH1	62.76/52.641/50.053	0/0/13.89	54.889	0.41913	-5.2995	45.194	3536.8	0.9159	0.0022414	0.99776	0.0044828	0.107	FALSE
HGLibB_14389	ECM1	27.386/92.122/58.396	0/13.331/0	52.829	0.41212	-5.2524	1111.1	3404	0.8984	0.0022954	0.9977	0.0045908	0.10913	FALSE
HGLibA_16407	FAM19A5	67.324/38.541/150.16	33.257/0/0	73.053	0.59353	-5.5383	3584.7	4707.2	1.0561	0.0022964	0.9977	0.0045927	0.10914	FALSE
HGLibA_43415	SEPHS2	73.03/78.021/20.476	0/11.109/0	48.887	0.38216	-5.1737	1119.4	3150	0.86422	0.002307	0.99769	0.0046141	0.10952	FALSE
HGLibB_02725	ARHGAP21	43.361/122.2/37.161	0/17.775/0	58.19	0.46331	-5.3381	2379.8	3749.5	0.94274	0.0023264	0.99767	0.0046528	0.11026	FALSE
HGLibA_30355	MTFMT	61.619/30.081/78.872	13.762/0/0	52.688	0.41753	-5.2432	638.22	3395	0.8971	0.0023322	0.99767	0.0046644	0.11047	FALSE
HGLibB_41986	RPP38	165.46/35.721/80.389	0/42.956/0	78.052	0.65511	-5.5778	4718.6	5029.3	1.0914	0.0023383	0.99766	0.0046765	0.11067	FALSE
HGLibA_58815	hsa-mir-3180-4	58.195/102.46/31.852	0/17.775/0	57.494	0.46331	-5.321	1340.1	3704.6	0.93698	0.0023573	0.99764	0.0047146	0.1114	FALSE
HGLibA_63655	hsa-mir-6868	66.183/47.941/70.53	20.643/0/0	60.714	0.49195	-5.3703	144.71	3912.1	0.96282	0.0023574	0.99764	0.0047148	0.1114	FALSE
HGLibA_30513	MTX2	55.913/38.541/68.255	14.909/0/0	52.789	0.43143	-5.2318	225.98	3401.5	0.89773	0.0024052	0.99759	0.0048104	0.11334	FALSE
HGLibA_52563	UBB	35.374/44.181/133.48	0/20.737/0	59.322	0.49285	-5.3365	3150.8	3822.5	0.95153	0.0024233	0.99758	0.0048467	0.11402	FALSE
HGLibB_49552	TLE3	91.287/56.401/63.704	0/32.587/0	68.966	0.58885	-5.4606	341.9	4443.9	1.0257	0.0024401	0.99756	0.0048802	0.11467	FALSE
HGLibA_35708	PDAP1	30.809/69.561/144.09	30.964/0/0	67.614	0.57725	-5.443	3603.7	4356.7	1.0156	0.002448	0.99755	0.004896	0.11492	FALSE
HGLibA_58781	hsa-mir-3177	28.527/48.881/28.819	5.7341/0/0	34.255	0.28784	-4.7748	138.14	2207.3	0.723	0.0024482	0.99755	0.0048964	0.11492	FALSE
HGLibB_19467	GNB2L1	76.453/15.04/82.664	0/0/10.914	45.677	0.37934	-5.0807	1626.9	2943.2	0.83496	0.0024532	0.99755	0.0049064	0.11507	FALSE
HGLibA_34232	OR5A2	74.171/46.061/32.611	12.615/0/0	48.124	0.40285	-5.13	461.68	3100.9	0.85697	0.0024718	0.99753	0.0049436	0.11586	FALSE
HGLibB_23125	IL37	25.104/34.781/0.75838	0/0/0	9.0043	0	-3.3225	495.81	580.2	0.37382	0.0024734	0.99753	0.0049468	0.11586	FALSE
HGLibB_29576	MOCS3	139.21/47.941/83.422	0/0/59.529	82.276	0.74169	-5.5793	2211	5301.5	1.1198	0.0024789	0.99752	0.0049578	0.11604	FALSE
HGLibA_22255	HSP90B1	60.478/117.5/49.295	0/37.031/0	70.5	0.61875	-5.465	1379.7	4542.7	1.0368	0.0024987	0.9975	0.0049974	0.11685	FALSE
HGLibA_16087	FAM127A	0/79.902/89.489	0/0/0	8.8492	0	-3.3	5814.8	570.2	0.37059	0.0025027	0.9975	0.0050053	0.11697	FALSE
HGLibB_03401	ATAD2	35.374/15.98/107.69	0/8.1468/0	39.369	0.33527	-4.9181	2615.4	2536.8	0.775	0.002506	0.99749	0.0050119	0.11703	FALSE
HGLibA_12527	DCPS	463.28/525.47/299.56	60.781/22.219/7.9371	417.79	22.086	-4.1811	13821	26921	2.4117	0.0025091	0.99749	0.0050183	0.11713	FALSE
HGLibB_52456	UBA5	22.822/70.501/161.54	0/28.144/0	63.854	0.5561	-5.3812	5634.8	4114.5	0.98681	0.0025188	0.99748	0.0050375	0.11751	FALSE
HGLibA_16883	FARSA	47.926/16.92/30.335	0/4.4437/0	29.093	0.25684	-4.5815	252.2	1874.6	0.666	0.0025255	0.99747	0.005051	0.11776	FALSE
HGLibA_14855	EIF5A	104.98/213.38/111.48	41.285/0/0.99214	135.68	1.5534	-5.7422	3783	8742.5	1.4345	0.0025262	0.99747	0.0050524	0.11777	FALSE
HGLibA_23704	ITCH	33.092/40.421/106.17	17.202/0/0	52.185	0.45723	-5.1897	1708.9	3362.6	0.89205	0.0025807	0.99742	0.0051614	0.11977	FALSE
HGLibA_03358	ASPM	28.527/74.261/109.21	0/27.403/0	61.407	0.55032	-5.3311	1765.6	3956.8	0.96747	0.002605	0.9974	0.0052099	0.1208	FALSE
HGLibA_40908	RFC3	66.183/68.621/71.288	38.992/0/0	68.666	0.63119	-5.4165	6.521	4424.5	1.0228	0.0026298	0.99737	0.0052596	0.12174	FALSE
HGLibA_37351	PNKP	100.42/117.5/65.979	0/102.95/0	91.996	0.91005	-5.6055	699.17	5927.8	1.183	0.0026312	0.99737	0.0052623	0.12177	FALSE
HGLibA_31677	NELFCD	54.772/35.721/43.986	0/0/11.906	44.152	0.39332	-5.0182	91.953	2844.9	0.8204	0.0026314	0.99737	0.0052628	0.12177	FALSE
HGLibA_18932	GET4	637.87/597.85/245.72	17.202/44.437/36.709	454.22	30.397	-3.8578	48916	29268	2.4773	0.0026636	0.99734	0.0053273	0.12294	FALSE
HGLibA_24959	KIF6	60.478/35.721/27.302	9.1745/0/0	38.931	0.35265	-4.8836	304.9	2508.5	0.77025	0.0026644	0.99734	0.0053288	0.12294	FALSE
HGLibA_61033	hsa-mir-4734	57.054/0/91.764	0/0.74062/0	7.9674	0.10333	-3.0228	4747.5	513.38	0.34708	0.0026851	0.99731	0.0053703	0.12357	FALSE
HGLibA_51863	TSHZ1	98.134/0/53.087	0/0/0	7.9542	0	-3.1626	5116.3	512.53	0.35135	0.0026881	0.99731	0.0053762	0.12366	FALSE
HGLibB_14900	ELL	67.324/0/77.355	0/0/0	7.953	0	-3.1624	4202.4	512.45	0.35132	0.0026884	0.99731	0.0053767	0.12366	FALSE
HGLibB_43195	SEC61A1	42.22/39.481/51.57	0/12.591/0	44.134	0.40253	-5.0081	40.305	2843.8	0.82006	0.0026942	0.99731	0.0053885	0.12391	FALSE
HGLibB_50892	TOMM20	35.374/74.261/36.402	13.762/0/0	45.734	0.41753	-5.043	504.11	2946.9	0.83479	0.0026976	0.9973	0.0053952	0.12404	FALSE
HGLibA_57121	hsa-let-7e	38.797/115.62/54.604	0/0/31.749	62.578	0.58291	-5.3279	1721.4	4032.3	0.9763	0.0027019	0.9973	0.0054038	0.12417	FALSE
HGLibA_49968	TMEM143	98.134/46.061/37.919	0/22.959/0	55.556	0.51322	-5.224	1107	3579.8	0.91997	0.0027112	0.99729	0.0054223	0.12452	FALSE
HGLibB_37647	POP7	21.681/20.68/142.58	0/10.369/0	40.02	0.3713	-4.9027	5614.1	2578.7	0.78078	0.0027329	0.99727	0.0054658	0.12537	FALSE
HGLibB_07623	CCDC146	47.926/35.721/35.644	0/10.369/0	39.37	0.3713	-4.8797	50.2	2536.8	0.77429	0.0027759	0.99722	0.0055519	0.12698	FALSE
HGLibA_47652	STX5	10.27/34.781/36.402	0/3.7031/0	23.535	0.23629	-4.3108	234	1516.5	0.59829	0.0027782	0.99722	0.0055563	0.12706	FALSE
HGLibB_54963	ZCCHC24	98.134/30.081/59.154	25.23/0/0	55.906	0.53272	-5.2144	1230.3	3602.3	0.92259	0.0027956	0.9972	0.0055912	0.12774	FALSE
HGLibA_40989	RFXAP	29.668/0/141.82	0/0/0	7.4035	0	-3.071	9308.9	477.05	0.33897	0.0028188	0.99718	0.0056376	0.12865	FALSE
HGLibA_52105	TTC30A	84.441/118.44/40.194	0/59.249/0	73.814	0.74037	-5.4258	1617.4	4756.3	1.0596	0.002832	0.99717	0.0056641	0.12915	FALSE
HGLibA_31946	NIP7	0/53.581/74.322	0/0/0	7.265	0	-3.047	3347.3	468.13	0.33578	0.002854	0.99715	0.005708	0.13008	FALSE
HGLibB_22150	HSD17B12	81.017/83.662/28.06	0/28.884/0	57.523	0.56179	-5.2277	1051.6	3706.5	0.93561	0.0028589	0.99714	0.0057178	0.13023	FALSE
HGLibB_34427	OR7D2	101.56/36.661/98.59	0/56.287/0	71.613	0.72615	-5.3946	1423	4614.4	1.0435	0.0028805	0.99712	0.005761	0.13096	FALSE
HGLibB_16710	FAM81A	41.079/41.361/55.362	16.055/0/0	45.48	0.44463	-5.0078	66.995	2930.5	0.83191	0.0028894	0.99711	0.0057788	0.13129	FALSE
HGLibA_31451	NDUFA2	35.374/24.44/145.61	20.643/0/0	50.145	0.49195	-5.0993	4996.2	3231.1	0.87351	0.0028955	0.9971	0.0057909	0.13152	FALSE
HGLibA_16534	FAM228A	58.195/20.68/27.302	0/7.4062/0	32.038	0.32183	-4.6435	417.82	2064.4	0.69805	0.0029084	0.99709	0.0058167	0.13193	FALSE
HGLibB_45918	SNRPC	51.349/27.261/78.114	0/18.515/0	47.829	0.47098	-5.0529	676.31	3081.9	0.85307	0.0029096	0.99709	0.0058191	0.13196	FALSE
HGLibA_53748	VPS25	41.079/88.362/0	0/0/0	7.0419	0	-3.0075	3910.5	453.75	0.33058	0.0029129	0.99709	0.0058259	0.13204	FALSE
HGLibB_34877	PABPC1L	31.95/48.881/84.181	21.789/0/0	50.856	0.50267	-5.1089	735.92	3276.9	0.87962	0.0029158	0.99708	0.0058316	0.13206	FALSE
HGLibB_34555	ORC1	31.95/45.121/69.013	17.202/0/0	46.342	0.45723	-5.0218	361.29	2986.1	0.83969	0.002916	0.99708	0.0058321	0.13206	FALSE
HGLibB_25837	KXD1	22.822/158.86/29.577	18.349/0/0	47.542	0.46928	-5.046	6663.1	3063.4	0.85048	0.0029168	0.99708	0.0058335	0.13206	FALSE
HGLibA_24689	KIAA1045	71.889/76.141/36.402	0/31.847/0	58.414	0.58361	-5.2295	490.17	3763.9	0.94261	0.0029209	0.99708	0.0058417	0.1322	FALSE
HGLibB_32088	NLRP7	89.005/15.04/140.3	0/30.365/0	57.33	0.57288	-5.2127	4838	3694.1	0.93382	0.0029263	0.99707	0.0058526	0.13237	FALSE
HGLibB_34569	ORC5	51.349/120.32/84.939	0/86.652/0	80.667	0.85373	-5.4612	1225.2	5197.8	1.107	0.0029283	0.99707	0.0058567	0.13243	FALSE
HGLibA_58995	hsa-mir-335	25.104/34.781/36.402	0/7.4062/0	31.678	0.32183	-4.6277	37.583	2041.2	0.69403	0.0029378	0.99706	0.0058757	0.13284	FALSE
HGLibA_28682	MDH1	0/40.421/85.697	0/0/0	6.9315	0	-2.9876	3686.8	446.64	0.32798	0.0029431	0.99706	0.0058863	0.13298	FALSE
HGLibA_15355	EPPIN	95.851/94.942/150.16	1.1468/23.7/0	110.97	1.337	-5.5823	1010.7	7150.5	1.2965	0.0029758	0.99702	0.0059516	0.13417	FALSE
HGLibA_53080	UPK3B	33.092/46.061/56.879	0/16.294/0	44.261	0.4473	-4.9668	143.6	2852	0.82042	0.0029864	0.99701	0.0059728	0.13452	FALSE
HGLibA_60983	hsa-mir-4721	76.453/24.44/51.57	0/0/17.859	45.858	0.46419	-5.0001	713.69	2954.9	0.83508	0.002992	0.99701	0.005984	0.13473	FALSE
HGLibA_58785	hsa-mir-3178	1.1411/25.38/21.235	0/0/0.99214	8.6707	0.12187	-3.1077	246.88	558.7	0.36167	0.002993	0.99701	0.0059859	0.13474	FALSE
HGLibA_41792	RP2	136.93/54.521/89.489	121.56/0/0	87.428	0.96754	-5.49	1768.8	5633.4	1.1519	0.0029946	0.99701	0.0059893	0.13479	FALSE
HGLibB_19839	GPR119	66.183/19.74/244.2	0/54.065/0	68.39	0.71515	-5.3383	16640	4406.7	1.0195	0.0029958	0.997	0.0059915	0.13482	FALSE
HGLibA_00195	ABCD2	37.656/34.781/69.013	17.202/0/0	44.882	0.45723	-4.9766	368.27	2892	0.82609	0.003011	0.99699	0.006022	0.13533	FALSE
HGLibB_28688	MECR	33.092/26.321/61.429	11.468/0/0	37.688	0.38725	-4.8016	357	2428.4	0.75692	0.0030177	0.99698	0.0060353	0.13558	FALSE
HGLibB_26202	LDLR	658.41/977.62/1086	176.61/257.74/285.74	887.5	235.17	-1.9115	50005	57186	2.7278	0.0030849	0.99692	0.0061697	0.13826	FALSE
HGLibA_33267	OCSTAMP	63.901/90.242/50.053	52.753/0/0	66.09	0.70852	-5.2953	422.64	4258.5	1.0019	0.0030884	0.99691	0.0061768	0.13836	FALSE
HGLibA_64374	hsa-mir-98	49.067/0/56.12	0/0/0	6.4141	0	-2.8903	2165.6	413.3	0.3155	0.0030951	0.9969	0.0061903	0.13864	FALSE
HGLibB_31464	NDUFB10	23.963/37.601/52.328	0/11.109/0	36.132	0.38216	-4.7477	206.29	2328.2	0.74091	0.0030973	0.9969	0.0061946	0.13868	FALSE
HGLibA_28832	MEF2BNB	0/53.581/50.812	0/0/0	6.3895	0	-2.8855	2120.6	411.71	0.3149	0.0031028	0.9969	0.0062056	0.13881	FALSE
HGLibB_00363	ACAD9	33.092/35.721/98.59	0/22.959/0	48.857	0.51322	-5.0421	1447.2	3148.1	0.86161	0.0031033	0.9969	0.0062066	0.13881	FALSE
HGLibB_08757	CDK2AP2	44.502/69.561/44.745	0/0/26.788	51.743	0.54543	-5.0929	209.45	3334.1	0.88666	0.0031083	0.99689	0.0062166	0.13891	FALSE
HGLibB_36368	PHKG2	54.772/0/48.537	0/0/0	6.3383	0	-2.8754	2083.4	408.41	0.31363	0.003119	0.99688	0.0062379	0.13926	FALSE
HGLibA_31902	NHLRC3	31.95/82.722/0	0/0/0	6.3268	0	-2.8732	3266.4	407.67	0.31335	0.0031226	0.99688	0.0062453	0.13937	FALSE
HGLibB_36473	PIBF1	20.54/0/124.37	0/0/0	6.2571	0	-2.8594	7097.5	403.18	0.31162	0.003145	0.99686	0.00629	0.14011	FALSE
HGLibB_08499	CDC123	6.8465/4.7001/7.5838	0/0/0	6.2513	0	-2.8582	2.2681	402.81	0.31148	0.0031469	0.99685	0.0062937	0.14014	FALSE
HGLibA_24405	KCNV2	37.656/66.741/0	0/0/0	6.2194	0	-2.8519	2344.9	400.75	0.31068	0.0031572	0.99684	0.0063145	0.14055	FALSE
HGLibA_29584	MOB1A	76.453/84.602/30.335	0/38.512/0	58.121	0.62818	-5.1823	904.67	3745	0.93947	0.0031625	0.99684	0.0063249	0.14073	FALSE
HGLibA_43638	SETD1A	59.337/50.761/62.187	0/37.031/0	57.217	0.61875	-5.1685	35.44	3686.8	0.93213	0.0031686	0.99683	0.0063372	0.14098	FALSE
HGLibA_15013	EMC4	46.785/94.942/80.389	0/70.359/0	70.949	0.78984	-5.3291	624.34	4571.7	1.0376	0.0031698	0.99683	0.0063395	0.141	FALSE
HGLibA_23803	ITGBL1	33.092/30.081/64.463	14.909/0/0	40.04	0.43143	-4.8415	371.97	2580	0.77979	0.0031754	0.99682	0.0063508	0.14123	FALSE
HGLibA_37672	POMT2	147.2/32.901/36.402	0/35.55/0	56.093	0.60906	-5.149	4613.1	3614.4	0.92289	0.0031866	0.99681	0.0063732	0.14165	FALSE
HGLibB_12744	DDX6	31.95/41.361/185.05	0/0/48.615	62.561	0.68684	-5.2357	8194.5	4031.1	0.97453	0.0031872	0.99681	0.0063744	0.14165	FALSE
HGLibB_31406	NDUFA13	57.054/44.181/75.08	0/38.512/0	57.416	0.62818	-5.165	243.66	3699.6	0.93363	0.0032049	0.9968	0.0064099	0.14225	FALSE
HGLibA_30382	MTHFD2	0/15.04/154.71	0/0/0	6.0656	0	-2.8208	11106	390.84	0.30681	0.0032084	0.99679	0.0064168	0.14238	FALSE
HGLibB_48136	TAF1	33.092/74.261/97.832	0/48.881/0	62.192	0.68827	-5.2261	1131.3	4007.4	0.97156	0.0032152	0.99678	0.0064304	0.14263	FALSE
HGLibB_34662	OSTC	42.22/54.521/0	0/0/0	6.0372	0	-2.815	1848.2	389.01	0.30609	0.0032181	0.99678	0.0064362	0.14267	FALSE
HGLibA_52524	UBA52	35.374/0/64.463	0/0/0	6.0183	0	-2.8111	2156.9	387.79	0.30561	0.0032246	0.99678	0.0064491	0.14285	FALSE
HGLibB_44352	SLC15A1	77.594/68.621/111.48	0/129.61/0	84.044	0.99058	-5.417	516.16	5415.4	1.1286	0.0032279	0.99677	0.0064559	0.14287	FALSE
HGLibB_29266	MIS18A	39.938/14.1/97.073	13.762/0/0	37.987	0.41753	-4.7815	2032.8	2447.7	0.75937	0.0032303	0.99677	0.0064606	0.14292	FALSE
HGLibB_34636	OSGEP	38.797/37.601/103.9	32.111/0/0	53.327	0.58549	-5.0987	1508	3436.2	0.89974	0.0032331	0.99677	0.0064662	0.14297	FALSE
HGLibB_51928	TSR1	29.668/24.44/42.47	9.1745/0/0	31.347	0.35265	-4.5798	87.114	2019.9	0.68964	0.0032501	0.99675	0.0065003	0.14359	FALSE
HGLibA_59303	hsa-mir-3687	38.797/17.86/84.939	0/14.812/0	38.92	0.43029	-4.8027	1280.6	2507.8	0.76859	0.0032539	0.99675	0.0065077	0.1437	FALSE
HGLibB_52014	TTC23	103.84/49.821/43.228	0/47.4/0	60.706	0.68024	-5.1987	1142.2	3911.6	0.95975	0.0032649	0.99674	0.0065298	0.14408	FALSE
HGLibB_38143	PPP3CC	26.245/0/79.63	0/0/0	5.8444	0	-2.7749	2947.4	376.59	0.30117	0.0032856	0.99671	0.0065712	0.14478	FALSE
HGLibA_50008	TMEM155	43.361/43.241/46.261	0/0/20.835	44.266	0.49378	-4.9214	2.9255	2852.3	0.8196	0.0032976	0.9967	0.0065951	0.14517	FALSE
HGLibB_10477	COG7	3.4233/50.761/134.99	8.0277/0/0	28.828	0.33317	-4.4837	6198.6	1857.6	0.66115	0.003304	0.9967	0.0066081	0.14533	FALSE
HGLibA_21952	HOXB9	76.453/22.56/38.678	0/17.034/0	40.57	0.45542	-4.836	807.76	2614.1	0.78458	0.0033106	0.99669	0.0066212	0.14553	FALSE
HGLibB_14931	ELOF1	434.75/709.71/339	44.726/25.922/57.544	471.17	40.564	-3.5059	37849	30360	2.4713	0.0033178	0.99668	0.0066357	0.14574	FALSE
HGLibA_37740	POTEI	73.03/27.261/0	0/0/0	5.7489	0	-2.7546	2511.3	370.43	0.2987	0.0033203	0.99668	0.0066406	0.14582	FALSE
HGLibA_08200	CCT4	141.49/10.34/30.335	12.615/0/0	35.467	0.40285	-4.7002	5949.8	2285.3	0.73348	0.003322	0.99668	0.0066439	0.14586	FALSE
HGLibA_46668	SPIN1	30.809/25.38/18.96	0/0/5.9529	24.568	0.29263	-4.306	35.534	1583.1	0.61013	0.0033223	0.99668	0.0066445	0.14586	FALSE
HGLibA_56778	ZNF8	21.681/48.881/122.1	0/30.365/0	50.606	0.57288	-5.0361	2975.5	3260.8	0.87618	0.003342	0.99666	0.006684	0.14667	FALSE
HGLibA_57713	hsa-mir-1302-6	33.092/55.461/38.678	18.349/0/0	41.407	0.46928	-4.8511	137.05	2668.1	0.79255	0.0033451	0.99665	0.0066901	0.14678	FALSE
HGLibB_22306	HSPE1	42.22/35.721/28.819	12.615/0/0	35.16	0.40285	-4.688	45.187	2265.6	0.73023	0.0033486	0.99665	0.0066972	0.14691	FALSE
HGLibA_50035	TMEM165	21.681/0/87.973	0/0/0	5.6673	0	-2.7371	3531.4	365.17	0.29657	0.0033506	0.99665	0.0067012	0.14694	FALSE
HGLibA_29239	MIDN	39.938/67.681/56.879	0/0/35.717	53.574	0.61017	-5.0829	197.94	3452.1	0.90145	0.0033536	0.99665	0.0067071	0.14704	FALSE
HGLibA_09724	CIRH1A	42.22/0/44.745	0/0/0	5.6467	0	-2.7326	1449.1	363.85	0.29603	0.0033584	0.99664	0.0067167	0.1472	FALSE
HGLibB_05888	C1orf68	101.56/22.56/34.127	20.643/0/0	42.78	0.49195	-4.875	1969.2	2756.6	0.80545	0.0033977	0.9966	0.0067953	0.14861	FALSE
HGLibA_51576	TRIM64	67.324/49.821/35.644	0/29.625/0	49.267	0.56738	-5.0032	255.98	3174.5	0.86434	0.0034029	0.9966	0.0068057	0.14878	FALSE
HGLibA_28790	MED26	0/43.241/40.953	0/0/0	5.5244	0	-2.7059	1354.1	355.97	0.29281	0.0034054	0.99659	0.0068107	0.1488	FALSE
HGLibA_60371	hsa-mir-4488	39.938/37.601/94.798	0/34.809/0	52.223	0.60412	-5.0522	1088.7	3365	0.88985	0.003411	0.99659	0.006822	0.14896	FALSE
HGLibA_52746	UBR1	30.809/25.38/24.268	0/7.4062/0	26.674	0.32183	-4.3879	12.281	1718.7	0.63563	0.003411	0.99659	0.006822	0.14896	FALSE
HGLibA_20873	HAUS1	15.975/33.841/94.04	14.909/0/0	37.072	0.43143	-4.7332	1850.4	2388.8	0.74968	0.0034153	0.99658	0.0068306	0.14903	FALSE
HGLibA_51457	TRIM3	30.809/22.56/100.87	0/19.256/0	41.253	0.47846	-4.8369	2006	2658.2	0.79086	0.0034231	0.99658	0.0068462	0.14924	FALSE
HGLibA_42792	SBDS	18.257/28.201/97.073	0/0/14.882	36.859	0.43112	-4.7254	2023.4	2375	0.74748	0.0034313	0.99657	0.0068625	0.14957	FALSE
HGLibB_21052	HEATR6	55.913/30.081/0	0/0/0	5.4293	0	-2.6847	1592.9	349.84	0.29028	0.003443	0.99656	0.006886	0.15003	FALSE
HGLibA_12289	DAD1	63.901/39.481/36.402	0/24.44/0	45.12	0.52608	-4.9175	230.26	2907.3	0.82704	0.003448	0.99655	0.006896	0.1502	FALSE
HGLibB_47764	SUPT5H	36.515/28.201/56.879	0/17.034/0	38.839	0.45542	-4.7747	222	2502.6	0.76727	0.0034513	0.99655	0.0069026	0.15031	FALSE
HGLibB_44430	SLC17A9	51.349/45.121/52.328	0/31.106/0	49.494	0.57829	-4.9997	15.3	3189.2	0.86618	0.0034522	0.99655	0.0069044	0.15032	FALSE
HGLibA_19536	GNG8	11.411/52.641/53.845	0/11.109/0	31.894	0.38216	-4.5728	665.92	2055.1	0.69512	0.0034691	0.99653	0.0069382	0.15089	FALSE
HGLibA_47779	SUMO2	518.05/407.03/837.26	42.432/65.915/132.95	560.99	71.92	-2.9462	50935	36148	2.5724	0.0034704	0.99653	0.0069407	0.15092	FALSE
HGLibA_63153	hsa-mir-675	1.1411/41.361/3.0335	0/0/0	5.3428	0	-2.6651	660.14	344.27	0.28795	0.0034781	0.99652	0.0069563	0.15117	FALSE
HGLibA_22288	HSPA5	71.889/0/21.993	0/0/0	5.318	0	-2.6595	2369	342.67	0.28728	0.0034884	0.99651	0.0069767	0.15152	FALSE
HGLibB_32955	NUFIP1	12.552/17.86/106.17	9.1745/0/0	28.805	0.35265	-4.4617	3185	1856	0.66042	0.0035003	0.9965	0.0070005	0.15194	FALSE
HGLibA_30477	MTRNR2L2	37.656/41.361/0	0/0/0	5.2894	0	-2.6529	1188.4	340.83	0.28651	0.0035003	0.9965	0.0070005	0.15194	FALSE
HGLibA_24328	KCNK5	102.7/29.141/63.704	0/48.881/0	57.569	0.68827	-5.1165	1441.2	3709.5	0.93391	0.0035029	0.9965	0.0070059	0.15203	FALSE
HGLibA_43697	SF3A3	52.49/80.842/49.295	0/0/53.576	59.364	0.71269	-5.1393	304.96	3825.1	0.94831	0.0035075	0.99649	0.007015	0.15217	FALSE
HGLibA_58590	hsa-mir-3134	0/55.461/27.302	0/0/0	5.2397	0	-2.6415	1518.2	337.62	0.28516	0.0035211	0.99648	0.0070423	0.15265	FALSE
HGLibB_10625	COLEC11	38.797/38.541/0	0/0/0	5.2168	0	-2.6362	1132.7	336.15	0.28454	0.0035308	0.99647	0.0070617	0.15292	FALSE
HGLibA_04301	BCL2L1	29.668/25.38/68.255	0/16.294/0	37.189	0.4473	-4.7217	580.54	2396.3	0.75056	0.003531	0.99647	0.007062	0.15292	FALSE
HGLibB_20453	GSTM4	25.104/0/59.154	0/0/0	5.2055	0	-2.6336	1666.7	335.42	0.28423	0.0035357	0.99646	0.0070714	0.15306	FALSE
HGLibA_12236	CYTH1	33.092/14.1/31.852	6.8809/0/0	24.595	0.31175	-4.2863	117.5	1584.8	0.60999	0.0035366	0.99646	0.0070733	0.15308	FALSE
HGLibB_26085	LCE2B	1.1411/2.8201/40.953	0/0/0	5.1988	0	-2.632	650.23	334.99	0.28405	0.0035386	0.99646	0.0070771	0.15313	FALSE
HGLibB_11751	CUBN	27.386/103.4/57.637	43.579/0/0	54.665	0.65874	-5.0686	1564.1	3522.4	0.90997	0.0035448	0.99646	0.0070896	0.15337	FALSE
HGLibA_10480	COG4	33.092/0/43.986	0/0/0	5.1696	0	-2.6252	1156.5	333.11	0.28325	0.0035511	0.99645	0.0071022	0.15351	FALSE
HGLibA_52512	UBA1	71.889/80.842/18.201	29.817/0/0	47.321	0.56882	-4.9449	1287.6	3049.2	0.84667	0.0035549	0.99645	0.0071098	0.15361	FALSE
HGLibA_29124	MGA	21.681/10.34/170.64	0/13.331/0	33.761	0.41212	-4.6215	9714.7	2175.4	0.71501	0.0035553	0.99644	0.0071105	0.15361	FALSE
HGLibB_48563	TBP	23.963/90.242/22.752	16.055/0/0	36.661	0.44463	-4.7043	1612.8	2362.3	0.74514	0.003557	0.99644	0.007114	0.15362	FALSE
HGLibA_04035	B4GALT5	25.104/57.341/0	0/0/0	5.1509	0	-2.6208	1574.2	331.9	0.28273	0.0035592	0.99644	0.0071185	0.15369	FALSE
HGLibB_18334	GABRA2	0/32.901/43.228	0/0/0	5.1291	0	-2.6157	1124.5	330.5	0.28214	0.0035687	0.99643	0.0071374	0.15393	FALSE
HGLibA_41893	RPL19	0/27.261/51.57	0/0/0	5.1094	0	-2.611	1337.7	329.23	0.28159	0.0035774	0.99642	0.0071547	0.15425	FALSE
HGLibB_19397	GMPPB	150.62/72.381/165.33	3.4404/20.737/0	121.71	1.8467	-5.4298	2586	7842.3	1.3535	0.0035856	0.99641	0.0071712	0.15443	FALSE
HGLibB_19435	GNAL	0/47.001/29.577	0/0/0	5.0898	0	-2.6064	1191	327.96	0.28105	0.003586	0.99641	0.007172	0.15443	FALSE
HGLibB_28367	MAST4	33.092/0/41.711	0/0/0	5.0773	0	-2.6034	1076.3	327.16	0.28071	0.0035915	0.99641	0.007183	0.15456	FALSE
HGLibB_07735	CCDC27	25.104/53.581/0	0/0/0	5.0337	0	-2.593	1392.5	324.35	0.2795	0.003611	0.99639	0.007222	0.1552	FALSE
HGLibB_20829	HARS	41.079/15.04/89.489	18.349/0/0	38.126	0.46928	-4.7349	1589.9	2456.7	0.75974	0.0036196	0.99638	0.0072392	0.15546	FALSE
HGLibA_55607	ZNF22	0/23.5/56.12	0/0/0	5.0004	0	-2.5851	1490.3	322.2	0.27857	0.0036261	0.99637	0.0072521	0.15565	FALSE
HGLibB_21636	HM13	59.337/37.601/44.745	0/30.365/0	46.391	0.57288	-4.9131	123.78	2989.2	0.83803	0.003653	0.99635	0.0073059	0.15666	FALSE
HGLibB_27139	LRIG2	14.834/1.88/45.503	0/0/1.9843	10.948	0.1752	-3.3458	645.69	705.44	0.4056	0.003668	0.99633	0.0073361	0.15714	FALSE
HGLibA_24395	KCNT2	22.822/0/54.604	0/0.74062/0	4.9052	0.10333	-2.4201	1407.5	316.07	0.2701	0.00367	0.99633	0.0073399	0.15714	FALSE
HGLibA_47111	SSB	125.52/34.781/36.402	0/46.659/0	54.182	0.67617	-5.041	2890.8	3491.2	0.90555	0.0036738	0.99633	0.0073476	0.15726	FALSE
HGLibB_15227	EPB41L3	14.834/18.8/36.402	0/5.9249/0	21.66	0.29203	-4.1324	136.05	1395.7	0.57197	0.0036747	0.99633	0.0073494	0.15726	FALSE
HGLibA_58041	hsa-mir-191	39.938/31.021/0	0/0/0	4.8947	0	-2.5594	967.28	315.39	0.27561	0.0036749	0.99633	0.0073498	0.15726	FALSE
HGLibB_52549	UBE2I	247.62/430.53/339.76	182.34/202.93/0	330.87	15.373	-4.3413	8471.1	21320	2.1607	0.0036759	0.99632	0.0073517	0.15727	FALSE
HGLibB_12305	DAP3	29.668/57.341/56.12	0/0/29.764	45.71	0.56842	-4.8963	250.5	2945.3	0.83178	0.0036787	0.99632	0.0073574	0.15732	FALSE
HGLibA_01183	AGFG1	27.386/86.482/78.872	0/0/54.568	57.18	0.71767	-5.082	1108.4	3684.4	0.9302	0.0036805	0.99632	0.007361	0.15736	FALSE
HGLibB_10328	CNOT3	53.631/22.56/0	0/0/0	4.8564	0	-2.55	1358	312.92	0.27453	0.003693	0.99631	0.0073859	0.15784	FALSE
HGLibB_27807	MAD2L1BP	52.49/22.56/0	0/0/0	4.821	0	-2.5413	1305.1	310.65	0.27353	0.0037098	0.99629	0.0074197	0.15841	FALSE
HGLibB_56860	ZNHIT2	1.1411/15.04/68.255	0/0/1.9843	10.77	0.1752	-3.3241	1707.7	693.98	0.40218	0.0037102	0.99629	0.0074205	0.15841	FALSE
HGLibB_14466	EED	43.361/33.841/103.14	45.872/0/0	53.302	0.67179	-5.0215	1480.7	3434.5	0.89805	0.003714	0.99629	0.007428	0.15851	FALSE
HGLibB_37879	PPIE	42.22/66.741/103.9	0/0/87.308	66.408	0.85613	-5.1825	995.35	4279	1.0021	0.0037154	0.99628	0.0074308	0.15853	FALSE
HGLibB_02188	ANO7	0/29.141/40.194	0/0/0	4.8024	0	-2.5367	934	309.45	0.273	0.0037188	0.99628	0.0074376	0.1586	FALSE
HGLibB_26699	LNP1	43.361/24.44/140.3	0/45.918/0	53.003	0.67205	-5.0134	4264.9	3415.3	0.89546	0.0037376	0.99626	0.0074752	0.15924	FALSE
HGLibB_32271	NOP56	43.361/26.321/0	0/0/0	4.7605	0	-2.5262	988.76	306.75	0.27181	0.0037392	0.99626	0.0074783	0.15927	FALSE
HGLibB_18599	GAR1	41.079/21.62/94.04	0/0/27.78	43.73	0.55328	-4.8479	1513.5	2817.8	0.81339	0.0037414	0.99626	0.0074828	0.15934	FALSE
HGLibA_08716	CDIPT	284.13/84.602/370.85	40.138/33.328/0	207.37	5.0237	-5.1124	23845	13362	1.7505	0.0037425	0.99626	0.007485	0.15936	FALSE
HGLibA_39718	QARS	13.693/0/81.905	0/0.74062/0	4.7362	0.10333	-2.3782	3028.9	305.18	0.2652	0.0037511	0.99625	0.0075023	0.15961	FALSE
HGLibA_02886	ARID1B	31.95/34.781/0	0/0/0	4.7173	0	-2.5153	833.85	303.96	0.27057	0.0037604	0.99624	0.0075209	0.15992	FALSE
HGLibB_39106	PSMD11	193.98/151.34/138.03	8.0277/37.772/0	159.43	3.034	-5.3136	858.8	10273	1.543	0.003766	0.99623	0.0075321	0.16013	FALSE
HGLibB_45362	SLC9A4	79.876/0/13.651	0/0/0	4.691	0	-2.5087	2877.5	302.27	0.26982	0.0037735	0.99623	0.0075471	0.16039	FALSE
HGLibB_19282	GLRA4	47.926/21.62/151.68	0/0/49.607	53.998	0.69215	-5.0225	5313.2	3479.4	0.9037	0.0037747	0.99623	0.0075494	0.16039	FALSE
HGLibB_29560	MOB3C	0/20.68/52.328	0/0/0	4.6761	0	-2.5049	1274.4	301.31	0.26939	0.003781	0.99622	0.0075621	0.16058	FALSE
HGLibA_57565	hsa-mir-1277	68.465/48.881/118.31	14.909/0.74062/0	73.437	0.98055	-5.232	1320.6	4731.9	1.0533	0.0037811	0.99622	0.0075623	0.16058	FALSE
HGLibA_26016	LAPTM4A	41.079/22.56/34.886	13.762/0/0	31.86	0.41753	-4.5349	90.314	2052.9	0.69396	0.0037948	0.99621	0.0075896	0.16101	FALSE
HGLibB_50829	TNP1	14.834/71.441/0	0/0/0	4.6451	0	-2.497	2293.6	299.31	0.26849	0.0037967	0.9962	0.0075934	0.16104	FALSE
HGLibA_03854	ATXN7L2	28.527/0/37.161	0/0/0	4.6425	0	-2.4963	824.73	299.14	0.26842	0.003798	0.9962	0.007596	0.16106	FALSE
HGLibB_42797	SCAND1	12.552/0/82.664	0/0/0	4.6134	0	-2.4889	3088.1	297.27	0.26758	0.0038129	0.99619	0.0076258	0.16155	FALSE
HGLibA_23188	IL6ST	23.963/43.241/0	0/0/0	4.607	0	-2.4872	944.22	296.86	0.26739	0.0038161	0.99618	0.0076323	0.16163	FALSE
HGLibA_60844	hsa-mir-4683	42.22/50.761/37.161	0/28.144/0	43.025	0.5561	-4.8223	47.441	2772.3	0.80658	0.0038212	0.99618	0.0076424	0.16182	FALSE
HGLibB_11956	CXXC11	41.079/0/25.027	0/0/0	4.5947	0	-2.4841	884.85	296.06	0.26703	0.0038225	0.99618	0.007645	0.16184	FALSE
HGLibB_04025	B4GALT2	18.257/0/56.12	0/0/0	4.5907	0	-2.483	1431.6	295.8	0.26692	0.0038246	0.99618	0.0076492	0.16187	FALSE
HGLibB_06724	C9orf40	20.54/78.962/58.396	0/1.4812/1.9843	45.601	0.59075	-4.8726	952.34	2938.4	0.83035	0.0038329	0.99617	0.0076659	0.16204	FALSE
HGLibB_04380	BDKRB2	27.386/20.68/73.563	0/17.034/0	34.681	0.45542	-4.6156	880.53	2234.7	0.724	0.0038351	0.99616	0.0076702	0.16204	FALSE
HGLibB_12144	CYP3A43	46.785/21.62/0	0/0/0	4.5698	0	-2.4776	1046.8	294.46	0.26631	0.0038354	0.99616	0.0076708	0.16204	FALSE
HGLibB_30542	MUT	18.257/54.521/0	0/0/0	4.5458	0	-2.4714	1353.1	292.91	0.26561	0.003848	0.99615	0.0076959	0.16246	FALSE
HGLibB_45837	SNAPC2	46.785/0/21.235	0/0/0	4.542	0	-2.4704	1041.9	292.67	0.2655	0.0038499	0.99615	0.0076999	0.16252	FALSE
HGLibA_40554	RBM43	47.926/20.68/0	0/0/0	4.5385	0	-2.4695	1081.8	292.44	0.26539	0.0038518	0.99615	0.0077036	0.16256	FALSE
HGLibB_42053	RPS21	21.681/78.021/8.3422	0/8.1468/0	24.209	0.33527	-4.2387	1577	1559.9	0.60446	0.0038543	0.99615	0.0077087	0.16258	FALSE
HGLibA_42169	RPS6KA5	21.681/0/45.503	0/0/0	4.5311	0	-2.4676	996.67	291.97	0.26518	0.0038557	0.99614	0.0077113	0.16258	FALSE
HGLibB_23085	IL27RA	0/10.34/94.04	0/0/0	4.5149	0	-2.4633	4034.5	290.92	0.2647	0.0038643	0.99614	0.0077285	0.16283	FALSE
HGLibB_29897	MRPL27	0/19.74/49.295	0/0/0	4.5105	0	-2.4622	1129	290.63	0.26457	0.0038666	0.99613	0.0077332	0.16287	FALSE
HGLibA_08715	CDIPT	47.926/49.821/25.785	0/23.7/0	39.491	0.51971	-4.7357	182.85	2544.7	0.77257	0.0038786	0.99612	0.0077572	0.16335	FALSE
HGLibB_06407	C5orf55	26.245/28.201/50.053	16.055/0/0	33.34	0.44463	-4.5711	178.04	2148.3	0.70972	0.0038806	0.99612	0.0077612	0.16338	FALSE
HGLibB_20412	GSPT1	65.042/94.002/15.926	0/34.809/0	46.042	0.60412	-4.8741	1784.1	2966.7	0.83421	0.0038825	0.99612	0.007765	0.16343	FALSE
HGLibA_06729	C9orf40	10.27/27.261/56.12	0/8.8874/0	25.073	0.34793	-4.2737	593.94	1615.6	0.61513	0.0038855	0.99611	0.007771	0.1635	FALSE
HGLibA_11819	CWC25	0/24.44/38.678	0/0/0	4.4655	0	-2.4504	794.7	287.74	0.26325	0.0038907	0.99611	0.0077813	0.16366	FALSE
HGLibA_06506	C6orf7	26.245/94.002/56.879	0/48.881/0	51.98	0.68827	-4.9718	1226.1	3349.4	0.88627	0.0039078	0.99609	0.0078156	0.16409	FALSE
HGLibA_03439	ATF4	9.1287/30.081/37.161	6.8809/0/0	21.713	0.31175	-4.1139	233.51	1399.1	0.57215	0.0039158	0.99608	0.0078316	0.16434	FALSE
HGLibB_31270	NCKAP1	38.797/23.5/0	0/0/0	4.4111	0	-2.4359	783.13	284.23	0.26164	0.0039203	0.99608	0.0078405	0.16443	FALSE
HGLibB_24023	KAT5	14.834/27.261/71.288	13.762/0/0	30.683	0.41753	-4.4823	955.84	1977.1	0.68067	0.0039236	0.99608	0.0078473	0.16452	FALSE
HGLibA_58811	hsa-mir-3180-3	69.606/61.101/30.335	45.872/0/0	50.537	0.67179	-4.9462	441.67	3256.4	0.87384	0.0039275	0.99607	0.007855	0.16457	FALSE
HGLibB_12421	DCAF17	150.62/54.521/18.201	52.753/0/0	53.112	0.70852	-4.9851	5364.7	3422.3	0.89578	0.003933	0.99607	0.0078661	0.16477	FALSE
HGLibA_44787	SLC26A11	37.656/23.5/0	0/0/0	4.3665	0	-2.424	746.68	281.36	0.26032	0.0039449	0.99606	0.0078898	0.16521	FALSE
HGLibA_58689	hsa-mir-3156-1	44.502/15.98/53.845	17.202/0/0	33.722	0.45723	-4.5746	417.96	2172.9	0.71362	0.0039499	0.99605	0.0078998	0.16536	FALSE
HGLibB_03749	ATP6V1E2	45.644/13.16/25.785	9.1745/0/0	24.941	0.35265	-4.2613	284.05	1607.1	0.61335	0.0039557	0.99604	0.0079114	0.16558	FALSE
HGLibB_34627	OSCAR	43.361/19.74/0	0/0/0	4.3179	0	-2.4109	890.44	278.23	0.25887	0.0039722	0.99603	0.0079445	0.16615	FALSE
HGLibB_02817	ARHGEF15	27.386/0/31.094	0/0/0	4.3095	0	-2.4086	634.25	277.69	0.25861	0.003977	0.99602	0.007954	0.16629	FALSE
HGLibB_12485	DCLK1	43.361/30.081/53.845	0/28.144/0	41.261	0.5561	-4.7633	143.89	2658.7	0.78943	0.0039802	0.99602	0.0079604	0.1664	FALSE
HGLibA_47436	STH	45.644/28.201/89.489	0/42.956/0	48.667	0.65511	-4.9073	1047.2	3135.9	0.85737	0.0039815	0.99602	0.0079629	0.16642	FALSE
HGLibA_41894	RPL21	0/13.16/63.704	0/0/0	4.29	0	-2.4033	1813.6	276.43	0.25803	0.0039881	0.99601	0.0079763	0.16664	FALSE
HGLibB_29896	MRPL24	15.975/0/52.328	0/0/0	4.2844	0	-2.4017	1231.6	276.07	0.25786	0.0039914	0.99601	0.0079828	0.16669	FALSE
HGLibA_26659	LMAN1L	0/47.941/17.443	0/0/0	4.2843	0	-2.4017	1048.7	276.06	0.25786	0.0039914	0.99601	0.0079828	0.16669	FALSE
HGLibA_56951	ZP1	0/20.68/40.194	0/0/0	4.2749	0	-2.3991	788.81	275.45	0.25757	0.0039968	0.996	0.0079937	0.1668	FALSE
HGLibA_37346	PNISR	57.054/4.7001/122.86	16.055/0/0	32.211	0.44463	-4.5229	4795.5	2075.5	0.69727	0.0040026	0.996	0.0080053	0.16701	FALSE
HGLibA_61499	hsa-mir-5088	0/16.92/48.537	0/0/0	4.2582	0	-2.3946	1069.5	274.38	0.25707	0.0040065	0.99599	0.0080129	0.1671	FALSE
HGLibA_31881	NGLY1	89.005/32.901/62.946	0/0/67.466	56.92	0.77749	-5.0261	821.34	3667.7	0.92704	0.004009	0.99599	0.0080179	0.1671	FALSE
HGLibB_11800	CWC15	66.183/12.22/0	0/0/0	4.2385	0	-2.3892	1959.4	273.11	0.25647	0.0040179	0.99598	0.0080358	0.16745	FALSE
HGLibB_33026	NUP85	33.092/24.44/0	0/0/0	4.2348	0	-2.3881	629.46	272.87	0.25636	0.0040201	0.99598	0.0080401	0.16751	FALSE
HGLibA_62607	hsa-mir-6087	17.116/0/47.02	0/0/0	4.2289	0	-2.3865	1007.5	272.49	0.25618	0.0040235	0.99598	0.008047	0.16759	FALSE
HGLibA_10329	CNOT10	25.104/23.5/107.69	0/0/26.788	39.924	0.54543	-4.7269	2540.8	2572.5	0.77639	0.0040292	0.99597	0.0080584	0.16777	FALSE
HGLibA_53177	USH1G	35.374/10.34/64.463	0/0/12.898	28.709	0.40655	-4.4007	830.07	1849.9	0.65804	0.0040485	0.99595	0.0080971	0.1684	FALSE
HGLibA_23472	IPO7	29.668/26.321/0	0/0/0	4.1845	0	-2.3742	578.47	269.63	0.25483	0.0040497	0.99595	0.0080995	0.16842	FALSE
HGLibB_08694	CDHR2	83.299/139.12/184.29	0/2.9625/43.654	128.78	2.2752	-5.3084	2628.2	8298.3	1.3888	0.0040521	0.99595	0.0081042	0.16849	FALSE
HGLibA_18600	GAMT	0/15.04/51.57	0/0/0	4.1769	0	-2.3721	1190.8	269.14	0.2546	0.0040543	0.99595	0.0081085	0.16852	FALSE
HGLibA_36290	PGRMC2	0/29.141/26.543	0/0/0	4.171	0	-2.3704	570.7	268.76	0.25442	0.0040578	0.99594	0.0081156	0.16864	FALSE
HGLibA_15763	EXOC8	478.12/765.17/636.28	69.955/91.837/170.65	615.15	103.12	-2.565	20866	39638	2.5718	0.0040606	0.99594	0.0081212	0.16868	FALSE
HGLibA_37341	PNCK	74.171/10.34/82.664	0/27.403/0	39.936	0.55032	-4.7227	1936.8	2573.3	0.77642	0.0040642	0.99594	0.0081285	0.16876	FALSE
HGLibA_62600	hsa-mir-6085	53.631/14.1/0	0/0/0	4.1414	0	-2.3622	1282.8	266.85	0.25352	0.0040756	0.99592	0.0081511	0.1692	FALSE
HGLibA_30043	MRPS16	1.1411/49.821/17.443	0/2.2219/0	10.182	0.18528	-3.2378	852.87	656.06	0.39027	0.0040801	0.99592	0.0081603	0.1693	FALSE
HGLibB_03282	ASF1B	0/30.081/25.027	0/0/0	4.1327	0	-2.3597	563.46	266.3	0.25325	0.0040808	0.99592	0.0081616	0.1693	FALSE
HGLibA_41241	RICTOR	53.631/43.241/43.986	0/42.215/0	46.725	0.65076	-4.8535	33.668	3010.7	0.83969	0.0041222	0.99588	0.0082443	0.1708	FALSE
HGLibA_56459	ZNF649	50.208/17.86/38.678	0/17.775/0	32.622	0.46331	-4.5221	281.92	2102	0.70143	0.0041242	0.99588	0.0082484	0.1708	FALSE
HGLibA_34751	OTP	65.042/12.22/59.912	0/22.959/0	36.284	0.51322	-4.6229	982.2	2338	0.73979	0.0041475	0.99585	0.0082949	0.17144	FALSE
HGLibB_15412	ERCC2	13.693/0/49.295	0/0/0	3.9843	0	-2.3174	1081.6	256.73	0.24866	0.0041733	0.99583	0.0083465	0.17233	FALSE
HGLibA_34721	OTC	0/19.74/34.127	0/0/0	3.9798	0	-2.3161	586.55	256.44	0.24852	0.0041761	0.99582	0.0083522	0.17241	FALSE
HGLibB_56924	ZSCAN18	52.49/36.661/5.3087	8.0277/0/0	21.767	0.33317	-4.094	718.3	1402.6	0.57232	0.004177	0.99582	0.0083541	0.17242	FALSE
HGLibA_56659	ZNF74	29.668/22.56/0	0/0/0	3.9707	0	-2.3135	510.85	255.86	0.24824	0.0041819	0.99582	0.0083639	0.17251	FALSE
HGLibA_38591	PRKRIR	31.95/9.4002/160.78	0/0/23.811	36.489	0.52068	-4.6237	8101	2351.2	0.74178	0.004186	0.99581	0.008372	0.17259	FALSE
HGLibB_26280	LEPREL1	44.502/58.281/26.543	0/31.847/0	40.99	0.58361	-4.7288	260.01	2641.2	0.78623	0.0042047	0.9958	0.0084093	0.17325	FALSE
HGLibA_33952	OR4C3	58.195/0/65.979	0/1.4812/0	7.1761	0.151	-2.8285	3056.1	462.4	0.3267	0.0042059	0.99579	0.0084118	0.17326	FALSE
HGLibB_51149	TPTE	11.411/0/56.12	0/0/0	3.9148	0	-2.2971	1398.5	252.25	0.24649	0.0042183	0.99578	0.0084366	0.17362	FALSE
HGLibB_47316	STARD7	22.822/0/28.06	0/0/0	3.9114	0	-2.2961	478.03	252.03	0.24638	0.0042206	0.99578	0.0084412	0.17368	FALSE
HGLibA_31378	NCSTN	11.411/63.921/76.597	0/27.403/0	38.277	0.55032	-4.663	1423.9	2466.4	0.75965	0.0042315	0.99577	0.008463	0.17401	FALSE
HGLibB_06442	C6orf136	63.901/50.761/12.893	0/22.219/0	34.741	0.50658	-4.5682	792.15	2238.5	0.72357	0.0042608	0.99574	0.0085217	0.17509	FALSE
HGLibA_63110	hsa-mir-6739	191.7/33.841/31.094	0/0/87.308	58.678	0.85613	-5.0068	9536.7	3780.9	0.94035	0.0042726	0.99573	0.0085451	0.17549	FALSE
HGLibA_12966	DENND6A	37.656/15.98/0	0/0/0	3.8303	0	-2.2721	653.23	246.81	0.24381	0.0042748	0.99573	0.0085496	0.17554	FALSE
HGLibA_15436	ERCC3	19.398/31.021/0	0/0/0	3.8296	0	-2.2719	498.2	246.76	0.24379	0.0042753	0.99572	0.0085506	0.17554	FALSE
HGLibB_51112	TPR	14.834/40.421/0	0/0/0	3.826	0	-2.2708	737.5	246.53	0.24367	0.0042777	0.99572	0.0085555	0.17561	FALSE
HGLibB_44133	SIN3B	0/22.56/26.543	0/0/0	3.823	0	-2.2699	440.96	246.34	0.24358	0.0042798	0.99572	0.0085596	0.17566	FALSE
HGLibA_44874	SLC2A3	52.49/29.141/28.06	22.936/0/0	35.016	0.51301	-4.5732	194.12	2256.3	0.72638	0.004284	0.99572	0.0085681	0.17574	FALSE
HGLibA_38180	PPP2R5D	31.95/30.081/40.953	0/21.478/0	34.017	0.4998	-4.5452	33.935	2191.9	0.7159	0.0042851	0.99571	0.0085702	0.17574	FALSE
HGLibB_31433	NDUFA9	33.092/64.861/26.543	28.67/0/0	38.485	0.56016	-4.6616	433.69	2479.8	0.76158	0.0042854	0.99571	0.0085708	0.17574	FALSE
HGLibB_03552	ATP11A	241.91/163.56/147.13	42.432/19.997/0	179.89	4.305	-5.0916	2593.2	11592	1.6309	0.0042867	0.99571	0.0085734	0.17574	FALSE
HGLibB_06376	C5orf38	23.963/24.44/0	0/0/0	3.7941	0	-2.2613	423.72	244.48	0.24266	0.0042996	0.9957	0.0085992	0.17611	FALSE
HGLibB_18835	GDF15	41.079/14.1/0	0/0/0	3.7814	0	-2.2574	755.95	243.66	0.24225	0.0043084	0.99569	0.0086167	0.17638	FALSE
HGLibA_49107	TEX37	17.116/28.201/43.986	0/14.072/0	27.698	0.42136	-4.3356	188.77	1784.7	0.64566	0.0043281	0.99567	0.0086562	0.17707	FALSE
HGLibA_29934	MRPL23	46.785/38.541/0	1.1468/0/0	5.5584	0.13188	-2.5346	1409.2	358.16	0.28674	0.0043305	0.99567	0.0086609	0.17713	FALSE
HGLibA_34714	OSTM1	41.079/13.16/121.34	33.257/0/0	40.376	0.59353	-4.6985	3648.3	2601.7	0.77995	0.0043391	0.99566	0.0086781	0.17736	FALSE
HGLibB_40338	RASSF6	28.527/26.321/43.228	0/19.256/0	31.901	0.47846	-4.476	85.412	2055.6	0.69307	0.0043456	0.99565	0.0086913	0.1776	FALSE
HGLibA_49801	TMED10	13.693/0/39.436	0/0.74062/0	3.6921	0.10333	-2.0884	695.64	237.91	0.23267	0.0043713	0.99563	0.0087427	0.1785	FALSE
HGLibA_28903	MEPE	4.5644/27.261/53.087	6.8809/0/0	18.834	0.31175	-3.9184	723.95	1213.6	0.53169	0.0043822	0.99562	0.0087644	0.17888	FALSE
HGLibA_11751	CTU2	28.527/20.68/39.436	0/15.553/0	28.551	0.43893	-4.3601	90.214	1839.7	0.65542	0.004393	0.99561	0.008786	0.17926	FALSE
HGLibB_37597	POM121C	44.502/30.081/72.046	0/0/47.623	45.866	0.68146	-4.8007	468.23	2955.4	0.83115	0.0043991	0.9956	0.0087982	0.17943	FALSE
HGLibB_50199	TMEM231	76.453/52.641/25.785	0/51.103/0	47.003	0.70001	-4.8195	674.64	3028.7	0.84137	0.0044093	0.99559	0.0088185	0.17971	FALSE
HGLibA_25199	KLHL36	22.822/22.56/0	0/0/0	3.6311	0	-2.2114	369.89	233.97	0.23739	0.0044157	0.99558	0.0088314	0.17988	FALSE
HGLibA_03567	ATP13A1	13.693/67.681/25.785	0/16.294/0	28.825	0.4473	-4.3651	874.01	1857.4	0.65846	0.0044402	0.99556	0.0088804	0.1807	FALSE
HGLibB_10264	CNGB1	46.785/23.5/0	0/0/0.99214	4.7008	0.12187	-2.3453	1073.3	302.9	0.2631	0.0044454	0.99555	0.0088908	0.18081	FALSE
HGLibA_10924	CPEB3	13.693/45.121/48.537	0/19.256/0	31.088	0.47846	-4.4399	401.98	2003.2	0.68391	0.0044465	0.99555	0.0088929	0.18081	FALSE
HGLibB_37990	PPP1R14B	39.938/142.88/99.348	1.1468/23.7/0	82.78	1.337	-5.1639	2861.1	5334	1.1151	0.0044543	0.99555	0.0089085	0.18099	FALSE
HGLibB_03692	ATP6AP1	0/3.7601/127.41	0/0.74062/0	3.5648	0.10333	-2.0487	7675	229.7	0.22839	0.0044653	0.99553	0.0089306	0.18131	FALSE
HGLibA_55643	ZNF233	65.042/27.261/70.53	0/0/63.497	50.018	0.75996	-4.8574	582.18	3222.9	0.86766	0.0044939	0.99551	0.0089879	0.18223	FALSE
HGLibA_42858	SCAP	454.15/298.93/239.65	4.5872/45.918/21.827	319.24	16.686	-4.1785	12474	20570	2.1095	0.0044966	0.9955	0.0089933	0.18228	FALSE
HGLibB_00720	ADAD2	13.693/47.941/84.181	0/0/31.749	38.124	0.58291	-4.6274	1407.2	2456.5	0.75743	0.0045002	0.9955	0.0090004	0.18239	FALSE
HGLibB_10514	COL18A1	34.233/0/13.651	0/0/0	3.5142	0	-2.1745	529.36	226.44	0.23353	0.004504	0.9955	0.009008	0.18251	FALSE
HGLibB_42068	RPS27	22.822/21.62/49.295	17.202/0/0	28.98	0.45723	-4.3627	252.39	1867.4	0.66006	0.004518	0.99548	0.009036	0.18296	FALSE
HGLibA_27707	LYN	29.668/23.5/15.168	0/0/9.9214	21.954	0.36449	-4.0723	53.979	1414.6	0.57401	0.0045395	0.99546	0.009079	0.18367	FALSE
HGLibA_42887	SCD5	31.95/29.141/54.604	0/30.365/0	37.049	0.57288	-4.5964	198.35	2387.3	0.74655	0.0045426	0.99546	0.0090853	0.18374	FALSE
HGLibA_29141	MGAT4A	26.245/120.32/34.127	0/57.768/0	47.608	0.73332	-4.8096	2962.7	3067.7	0.84632	0.0045607	0.99544	0.0091215	0.18428	FALSE
HGLibA_14552	EFCAB7	52.49/17.86/67.496	0/0/36.709	39.868	0.61667	-4.6599	703.48	2568.9	0.77443	0.0045641	0.99544	0.0091281	0.18435	FALSE
HGLibA_12155	CYP3A4	27.386/15.98/0	0/0/0	3.4356	0	-2.1491	371.4	221.38	0.23091	0.0045658	0.99543	0.0091316	0.18439	FALSE
HGLibB_42578	SAE1	160.89/61.101/96.315	0/2.2219/25.796	98.204	1.7184	-5.1896	2655.1	6327.8	1.2129	0.004572	0.99543	0.0091441	0.18455	FALSE
HGLibA_44349	SLC10A7	13.693/53.581/50.053	24.083/0/0	33.263	0.52302	-4.4916	538.87	2143.3	0.70718	0.0045771	0.99542	0.0091541	0.18469	FALSE
HGLibB_41889	RPL34	149.48/71.441/185.05	2.2936/70.359/0	125.5	2.4645	-5.1903	3521.6	8086.6	1.3682	0.0045812	0.99542	0.0091625	0.18483	FALSE
HGLibA_34539	OR8J1	22.822/18.8/0	0/0/0	3.4121	0	-2.1415	312.59	219.86	0.23012	0.0045847	0.99542	0.0091695	0.18489	FALSE
HGLibB_23168	IL9	36.515/61.101/16.684	0/24.44/0	33.405	0.52608	-4.4947	528.16	2152.5	0.70868	0.0045862	0.99541	0.0091724	0.18489	FALSE
HGLibA_24581	KHSRP	58.195/30.081/61.429	58.487/0/0	47.559	0.73676	-4.8053	305.5	3064.5	0.84581	0.004587	0.99541	0.0091741	0.18489	FALSE
HGLibA_09577	CHRNA5	23.963/17.86/0	0/0/0	3.4093	0	-2.1405	321.45	219.68	0.23002	0.004587	0.99541	0.0091741	0.18489	FALSE
HGLibA_52710	UBL5	23.963/33.841/138.03	60.781/0/0	48.219	0.74754	-4.8158	4430.2	3107	0.85164	0.0045897	0.99541	0.0091794	0.18493	FALSE
HGLibA_45386	SLC7A9	0/50.761/8.3422	0/0/0	3.4017	0	-2.1381	1139.4	219.19	0.22977	0.0045932	0.99541	0.0091864	0.18503	FALSE
HGLibA_03422	ATAT1	43.361/19.74/37.919	0/22.219/0	31.905	0.50658	-4.449	157.7	2055.8	0.69249	0.0046015	0.9954	0.009203	0.18521	FALSE
HGLibA_60202	hsa-mir-4449	0/22.56/18.201	0/0/0	3.3614	0	-2.1248	300.06	216.59	0.2284	0.0046263	0.99537	0.0092526	0.18608	FALSE
HGLibA_62454	hsa-mir-589	12.552/0/32.611	0/0/0	3.359	0	-2.124	475.72	216.44	0.22832	0.0046283	0.99537	0.0092565	0.18613	FALSE
HGLibB_51794	TSHR	18.257/51.701/28.819	0/0/19.843	30.084	0.48425	-4.3884	304.38	1938.5	0.67229	0.0046325	0.99537	0.009265	0.18627	FALSE
HGLibB_22462	ICAM1	69.606/5.6401/0	0/0/0	3.3203	0	-2.1111	2205.1	213.95	0.227	0.0046606	0.99534	0.0093212	0.18715	FALSE
HGLibA_30947	MZT2B	41.079/9.4002/0	0/0/0	3.2947	0	-2.1026	737.9	212.3	0.22612	0.0046823	0.99532	0.0093646	0.18786	FALSE
HGLibA_28754	MED14	26.245/56.401/48.537	43.579/0/0	41.578	0.65874	-4.682	251.62	2679.1	0.79056	0.0046837	0.99532	0.0093674	0.18788	FALSE
HGLibB_35307	PBXIP1	63.901/30.081/25.785	0/32.587/0	36.74	0.58885	-4.57	451.04	2367.4	0.743	0.0047065	0.99529	0.0094129	0.18874	FALSE
HGLibB_47426	STK32A	18.257/20.68/0	0/0.74062/0	3.2663	0.10333	-1.9511	269.33	210.47	0.21802	0.0047067	0.99529	0.0094133	0.18874	FALSE
HGLibB_01314	AHSA2	30.809/12.22/0	0/0/0	3.2644	0	-2.0923	424.8	210.34	0.22508	0.0047083	0.99529	0.0094167	0.18878	FALSE
HGLibB_31204	NBPF9	96.992/72.381/82.664	0/32.587/0.99214	83.412	1.4283	-5.1194	153.33	5374.7	1.1183	0.0047157	0.99528	0.0094314	0.18891	FALSE
HGLibB_40890	RFPL4AL1	106.12/90.242/13.651	0/75.543/0	50.811	0.81115	-4.8383	2997.4	3274	0.87383	0.0047208	0.99528	0.0094415	0.18905	FALSE
HGLibB_45587	SMC1A	103.84/58.281/17.443	0/0/62.505	47.293	0.75547	-4.7819	2104.6	3047.4	0.84303	0.004731	0.99527	0.0094621	0.18936	FALSE
HGLibB_56868	ZNRD1	25.104/29.141/71.288	34.404/0/0	37.371	0.60139	-4.5826	684.3	2408	0.7493	0.0047313	0.99527	0.0094626	0.18936	FALSE
HGLibA_20055	GPR56	34.233/0/10.617	0/0/0	3.2261	0	-2.0793	513.22	207.87	0.22376	0.0047418	0.99526	0.0094835	0.18964	FALSE
HGLibB_24459	KDM2A	13.693/14.1/43.986	0/9.628/0	20.416	0.35991	-3.9771	320.32	1315.5	0.55296	0.0047504	0.99525	0.0095008	0.18989	FALSE
HGLibB_19935	GPR17	29.668/15.04/73.563	0/24.44/0	32.04	0.52608	-4.4363	1009.4	2064.5	0.69358	0.0047613	0.99524	0.0095227	0.19026	FALSE
HGLibA_22537	IDE	14.834/23.5/0	0/0/0	3.1787	0	-2.0631	279.46	204.82	0.22211	0.0047839	0.99522	0.0095679	0.19106	FALSE
HGLibA_30224	MSMB	10.27/109.04/0	1.1468/0/0	4.7371	0.13188	-2.3416	5466.3	305.24	0.26359	0.0047881	0.99521	0.0095762	0.19114	FALSE
HGLibA_30711	MYH13	26.245/5.6401/62.187	0/10.369/0	21.019	0.3713	-4.0051	979.33	1354.4	0.56105	0.0047889	0.99521	0.0095778	0.19114	FALSE
HGLibA_26968	LOC643669	29.668/33.841/95.556	0/59.249/0	45.791	0.74037	-4.7488	1439.7	2950.6	0.82937	0.0047893	0.99521	0.0095787	0.19114	FALSE
HGLibA_28782	MED23	73.03/181.42/140.3	34.404/0/4.9607	122.96	2.4943	-5.1488	3105.8	7923.3	1.3534	0.0047897	0.99521	0.0095793	0.19114	FALSE
HGLibA_10506	COL12A1	49.067/51.701/163.05	16.055/1.4812/0	74.522	1.267	-5.058	4503.2	4801.9	1.0571	0.0048101	0.99519	0.0096201	0.19183	FALSE
HGLibA_26391	LGALSL	39.938/0/8.3422	0/0/0	3.1333	0	-2.0473	695.77	201.89	0.22051	0.0048253	0.99517	0.0096505	0.1923	FALSE
HGLibB_43312	SEMA6A	11.411/140.06/81.905	0/80.727/0	50.856	0.83151	-4.8234	5238.9	3276.9	0.87387	0.0048355	0.99516	0.0096711	0.19262	FALSE
HGLibB_46926	SRGAP3	10.27/28.201/44.745	0/13.331/0	23.51	0.41212	-4.1174	324.11	1514.9	0.59345	0.0048564	0.99514	0.0097127	0.19313	FALSE
HGLibA_51410	TRIM14	38.797/31.021/72.805	0/57.028/0	44.422	0.72975	-4.7147	508.41	2862.4	0.81666	0.0048653	0.99513	0.0097307	0.19342	FALSE
HGLibB_44896	SLC35A2	21.681/41.361/40.953	0/28.144/0	33.244	0.5561	-4.4598	129.51	2142.1	0.70626	0.0048703	0.99513	0.0097405	0.19352	FALSE
HGLibA_21925	HOXB1	52.49/43.241/29.577	45.872/0/0	40.645	0.67179	-4.6387	134.77	2619	0.78109	0.0048829	0.99512	0.0097658	0.19389	FALSE
HGLibA_18043	FRRS1L	20.54/31.961/34.886	0/19.997/0	28.401	0.48574	-4.3066	58.263	1830	0.65254	0.0048855	0.99511	0.009771	0.1939	FALSE
HGLibB_20778	HADH	79.876/0/3.7919	0/0/0	3.0456	0	-2.0164	2956.4	196.25	0.21741	0.0049076	0.99509	0.0098153	0.19461	FALSE
HGLibB_03989	B3GNT4	17.116/17.86/0	0/0/0	3.0387	0	-2.0139	213.55	195.8	0.21716	0.0049143	0.99509	0.0098286	0.19484	FALSE
HGLibB_03131	ARSD	51.349/46.061/47.778	0/6.6656/0.99214	48.347	0.80405	-4.7736	7.2809	3115.2	0.8518	0.0049255	0.99507	0.009851	0.19516	FALSE
HGLibA_59642	hsa-mir-3960	31.95/9.4002/0	0/0.74062/0	3.0226	0.10333	-1.8663	443.31	194.77	0.20918	0.0049299	0.99507	0.0098597	0.19527	FALSE
HGLibB_18823	GDE1	7.9876/48.881/78.872	0/25.922/0	31.409	0.53843	-4.3969	1553.3	2023.9	0.68621	0.0049606	0.99504	0.0099213	0.19639	FALSE
HGLibB_36103	PFDN6	76.453/166.38/185.05	6.8809/0/39.686	133.03	2.9284	-5.0925	3509.5	8572	1.4052	0.0049722	0.99503	0.0099445	0.19675	FALSE
HGLibA_60678	hsa-mir-4644	5.7054/0/50.053	0/0/0	2.9764	0	-1.9915	1116.3	191.79	0.21492	0.0049753	0.99502	0.0099505	0.19684	FALSE
HGLibB_09238	CFB	136.93/78.962/75.08	10.321/5.9249/0	93.289	1.7448	-5.1023	1220.7	6011.1	1.1807	0.0049825	0.99502	0.0099649	0.19702	FALSE
HGLibB_46388	SPATA2	0/15.04/18.96	0/0/0	2.9673	0	-1.9881	205.16	191.2	0.21459	0.0049844	0.99502	0.0099688	0.19707	FALSE
HGLibB_36314	PHF2	34.233/21.62/25.785	0/18.515/0	26.725	0.47098	-4.2363	41.652	1722	0.63267	0.0049894	0.99501	0.0099789	0.1972	FALSE
HGLibA_39862	RAB28	34.233/32.901/17.443	0/19.256/0	26.988	0.47846	-4.2426	89.277	1739	0.6357	0.0050269	0.99497	0.010054	0.19839	FALSE
HGLibB_03233	ASB3	63.901/12.22/73.563	0/43.696/0	38.627	0.65942	-4.5778	1278.3	2489	0.76104	0.0050311	0.99497	0.010062	0.19849	FALSE
HGLibA_06891	CACNA1F	47.926/5.6401/0	0/0/0	2.9209	0	-1.9712	1020.7	188.21	0.21291	0.0050313	0.99497	0.010063	0.19849	FALSE
HGLibA_28643	MCOLN3	49.067/27.261/29.577	0/32.587/0	34.077	0.58885	-4.4645	145.7	2195.8	0.71466	0.0050439	0.99496	0.010088	0.19896	FALSE
HGLibB_04999	BUD31	25.104/15.98/78.872	0/0/27.78	31.65	0.55328	-4.3937	1259.1	2039.4	0.6886	0.0050635	0.99494	0.010127	0.19967	FALSE
HGLibB_35636	PCSK6	0/24.44/10.617	0/0/0	2.8739	0	-1.9538	266.67	185.18	0.21119	0.0050799	0.99492	0.01016	0.20021	FALSE
HGLibA_06099	C2CD4B	28.527/56.401/0	0/1.4812/0	5.3485	0.151	-2.4635	1586.1	344.64	0.27997	0.005081	0.99492	0.010162	0.20021	FALSE
HGLibA_36081	PEX10	30.809/36.661/20.476	0/22.219/0	28.494	0.50658	-4.2911	68.168	1836.1	0.65317	0.0050814	0.99492	0.010163	0.20021	FALSE
HGLibB_51976	TTBK2	49.067/58.281/43.228	87.158/0/0	49.816	0.85558	-4.7753	57.812	3209.9	0.86416	0.0050843	0.99492	0.010169	0.20029	FALSE
HGLibB_12743	DDX59	49.067/9.4002/44.745	20.643/0/0	27.466	0.49195	-4.254	545.76	1769.8	0.64119	0.0050924	0.99491	0.010185	0.20054	FALSE
HGLibA_44962	SLC35B2	90.146/92.122/73.563	3.4404/13.331/0	84.851	1.5816	-5.0555	104.16	5467.5	1.1261	0.0051139	0.99489	0.010228	0.20119	FALSE
HGLibA_41991	RPL6	9.1287/27.261/0	0/0/0	2.8337	0	-1.9388	322.16	182.59	0.20971	0.0051224	0.99488	0.010245	0.20149	FALSE
HGLibA_36772	PIWIL1	4.5644/53.581/0	0/0/0	2.8255	0	-1.9357	1293.6	182.06	0.2094	0.0051312	0.99487	0.010262	0.20171	FALSE
HGLibA_43808	SGCG	33.092/46.061/51.57	0/59.99/0	42.839	0.74385	-4.6518	90.814	2760.3	0.80121	0.0051406	0.99486	0.010281	0.20197	FALSE
HGLibB_03764	ATP6V1H	53.631/30.081/54.604	66.515/0/0	44.499	0.77335	-4.6813	196.7	2867.3	0.81658	0.0051489	0.99485	0.010298	0.20223	FALSE
HGLibA_11177	CRISPLD2	73.03/69.561/50.812	1.1468/14.812/0	63.673	1.1297	-4.9245	143.82	4102.8	0.97643	0.0051558	0.99484	0.010312	0.20247	FALSE
HGLibA_06590	C7orf73	15.975/99.642/57.637	69.955/0/0	45.137	0.78814	-4.6894	1988.7	2908.5	0.82235	0.0051741	0.99483	0.010348	0.20308	FALSE
HGLibA_48259	TAF8	524.9/408.91/404.22	79.13/72.581/17.859	442.7	46.838	-3.2133	4689.9	28525	2.3438	0.0051846	0.99482	0.010369	0.20334	FALSE
HGLibB_23312	INPP5A	18.257/28.201/68.255	0/32.587/0	32.769	0.58885	-4.4097	745.33	2111.5	0.70032	0.0052256	0.99477	0.010451	0.20461	FALSE
HGLibA_60087	hsa-mir-4425	15.975/14.1/0	0/0/0	2.7367	0	-1.9018	155.94	176.34	0.20609	0.005229	0.99477	0.010458	0.20469	FALSE
HGLibA_18380	GABRB3	25.104/47.941/32.611	0/0/35.717	33.987	0.61017	-4.4415	137.76	2190	0.71322	0.00524	0.99476	0.01048	0.20507	FALSE
HGLibB_15955	FAM101B	26.245/8.4602/0	0/0/0	2.7253	0	-1.8973	296.75	175.6	0.20566	0.005242	0.99476	0.010484	0.20508	FALSE
HGLibA_63091	hsa-mir-6734	18.257/35.721/57.637	0/34.809/0	33.51	0.60412	-4.4272	409.83	2159.2	0.70815	0.0052547	0.99475	0.010509	0.20555	FALSE
HGLibA_19828	GPN2	195.13/164.5/126.65	27.523/28.884/0	159.6	4.21	-4.946	1185.9	10284	1.5323	0.0052631	0.99474	0.010526	0.2058	FALSE
HGLibA_00229	ABHD1	30.809/15.04/124.37	49.313/0/0	38.665	0.69058	-4.5523	3983	2491.4	0.76079	0.0052653	0.99473	0.010531	0.20586	FALSE
HGLibA_43416	SEPHS2	27.386/148.52/97.073	14.909/0/1.9843	73.393	1.3625	-4.9768	4160.9	4729.1	1.0474	0.0052732	0.99473	0.010546	0.20603	FALSE
HGLibB_14771	EIF3J	33.092/12.22/142.58	2.2936/0/1.9843	38.685	0.69312	-4.5508	5762.5	2492.7	0.76095	0.0052821	0.99472	0.010564	0.20635	FALSE
HGLibA_48198	TAF10	42.22/108.1/56.12	2.2936/8.1468/0	63.515	1.1544	-4.9043	1248.1	4092.6	0.97478	0.0052848	0.99472	0.01057	0.20638	FALSE
HGLibB_51372	TRIM23	22.822/29.141/98.59	0/55.546/0	40.342	0.72252	-4.585	1912.6	2599.5	0.77709	0.0052915	0.99471	0.010583	0.20655	FALSE
HGLibA_10433	CNTNAP5	54.772/16.92/67.496	0/0/53.576	39.718	0.71269	-4.5713	758.99	2559.3	0.77102	0.0052977	0.9947	0.010595	0.20675	FALSE
HGLibA_58615	hsa-mir-3139	112.97/12.22/46.261	55.047/0/0	40.021	0.72005	-4.5758	3066.5	2578.8	0.77392	0.0053139	0.99469	0.010628	0.20725	FALSE
HGLibB_51085	TPM3	25.104/28.201/95.556	0/57.768/0	40.763	0.73332	-4.5906	1702.7	2626.6	0.78106	0.0053179	0.99468	0.010636	0.20737	FALSE
HGLibA_59117	hsa-mir-3621	34.233/54.521/43.228	0/67.396/0	43.212	0.77719	-4.6368	104.26	2784.4	0.80419	0.0053267	0.99467	0.010653	0.20768	FALSE
HGLibA_34667	OSBPL8	12.552/8.4602/38.678	0/8.1468/0	16.034	0.33527	-3.6732	291.11	1033.2	0.4884	0.0053309	0.99467	0.010662	0.20778	FALSE
HGLibA_27279	LRRC2	46.785/16.92/53.845	40.138/0/0	34.947	0.63827	-4.4556	411.12	2251.8	0.723	0.0053448	0.99466	0.01069	0.20822	FALSE
HGLibB_18255	FZD7	25.104/22.56/6.0671	0/7.4062/0	15.115	0.32183	-3.6078	118.54	973.94	0.47402	0.0053473	0.99465	0.010695	0.20825	FALSE
HGLibA_08195	CCT2	36.515/17.86/0	1.1468/0/0	3.9364	0.13188	-2.1247	635.36	253.64	0.23888	0.0053671	0.99463	0.010734	0.20892	FALSE
HGLibA_14757	EIF2S2	7.9876/48.881/33.369	17.202/0/0	23.568	0.45723	-4.0755	489.77	1518.6	0.59305	0.0053789	0.99462	0.010758	0.2092	FALSE
HGLibB_32576	NR3C1	39.938/29.141/53.087	0/0/55.56	39.536	0.72259	-4.5565	145.93	2547.5	0.76899	0.0053953	0.9946	0.010791	0.20964	FALSE
HGLibB_48059	SZT2	19.398/54.521/87.973	0/0/79.371	45.336	0.82627	-4.6652	1287.5	2921.3	0.82351	0.0054022	0.9946	0.010804	0.20985	FALSE
HGLibA_07817	CCDC61	7.9876/39.481/52.328	20.643/0/0	25.503	0.49195	-4.1509	610.89	1643.3	0.61698	0.0054222	0.99458	0.010844	0.21046	FALSE
HGLibB_03408	ATAD3A	27.386/52.641/54.604	0/0/69.45	42.863	0.786	-4.6182	236.49	2761.9	0.80064	0.0054305	0.99457	0.010861	0.21063	FALSE
HGLibB_40467	RBM25	12.552/91.182/15.926	0/22.219/0	26.352	0.50658	-4.1823	2251	1698	0.62721	0.0054323	0.99457	0.010865	0.21066	FALSE
HGLibB_13038	DGCR8	163.18/125.96/109.97	26.377/12.591/0	131.24	3.1269	-5.0019	750.18	8456.3	1.3931	0.0054369	0.99456	0.010874	0.21081	FALSE
HGLibB_51273	TRAPPC8	50.208/30.081/34.886	0/50.362/0	37.491	0.69614	-4.5042	111.71	2415.8	0.74862	0.0054643	0.99454	0.010929	0.21176	FALSE
HGLibA_07334	CASQ1	26.245/7.5201/127.41	28.67/0/0	29.371	0.56016	-4.2829	5049.3	1892.6	0.66227	0.0054753	0.99452	0.010951	0.21206	FALSE
HGLibB_55100	ZFC3H1	43.361/29.141/54.604	5.7341/0/0.99214	41.018	0.7605	-4.577	165.57	2643	0.78307	0.0054829	0.99452	0.010966	0.21232	FALSE
HGLibA_30450	MTO1	35.374/41.361/34.886	0/51.103/0	37.094	0.70001	-4.486	13.021	2390.2	0.74442	0.0055498	0.99445	0.0111	0.21452	FALSE
HGLibA_16414	FAM200B	47.926/33.841/28.06	0/46.659/0	35.705	0.67617	-4.4527	105.63	2300.7	0.73029	0.0055532	0.99445	0.011106	0.2146	FALSE
HGLibA_55139	ZEB2	53.631/13.16/41.711	0/33.328/0	30.9	0.59402	-4.3228	474.15	1991	0.67918	0.005555	0.99444	0.01111	0.2146	FALSE
HGLibA_39236	PSTK	28.527/5.6401/0	0/0/0	2.4423	0	-1.7834	348.31	157.37	0.19469	0.0055907	0.99441	0.011181	0.21569	FALSE
HGLibA_17868	FOXF2	15.975/87.422/67.496	88.304/0/0	45.546	0.85975	-4.6455	1554.9	2934.8	0.82487	0.0055967	0.9944	0.011193	0.21588	FALSE
HGLibB_33711	OR2AK2	0/6.5801/24.268	0/0/0	2.4344	0	-1.78	249.92	156.86	0.19437	0.0056014	0.9944	0.011203	0.21599	FALSE
HGLibB_32986	NUP160	204.25/141/165.33	33.257/37.772/0	168.24	4.9177	-4.8379	1023.7	10840	1.5686	0.0056026	0.9944	0.011205	0.216	FALSE
HGLibA_36310	PHAX	54.772/25.38/12.893	0/0/23.811	26.188	0.52068	-4.1602	497.25	1687.4	0.62483	0.0056137	0.99439	0.011227	0.21629	FALSE
HGLibB_44810	SLC2A13	31.95/16.92/27.302	0/0/20.835	24.534	0.49378	-4.0954	60.318	1580.8	0.60463	0.0056211	0.99438	0.011242	0.21651	FALSE
HGLibB_10325	CNOT2	20.54/31.961/45.503	0/34.809/0	31.033	0.60412	-4.3197	160.18	1999.6	0.68047	0.0056285	0.99437	0.011257	0.21667	FALSE
HGLibA_01451	AKAP9	31.95/53.581/29.577	52.753/0/0	36.999	0.70852	-4.4751	177.77	2384	0.74325	0.0056312	0.99437	0.011262	0.21672	FALSE
HGLibB_00144	ABCB5	28.527/6.5801/166.09	0/36.29/0	31.575	0.61394	-4.3351	9363.6	2034.6	0.68641	0.0056332	0.99437	0.011266	0.21677	FALSE
HGLibA_45847	SMURF2	39.938/30.081/30.335	0/0/40.678	33.155	0.64155	-4.379	31.706	2136.4	0.70344	0.0056359	0.99436	0.011272	0.21683	FALSE
HGLibA_22081	HRASLS5	10.27/113.74/31.094	0/40.734/0	33.17	0.64189	-4.3793	3510.3	2137.3	0.70359	0.0056367	0.99436	0.011273	0.21683	FALSE
HGLibA_53482	UXT	0/74.261/37.161	2.2936/0/0	6.4193	0.18819	-2.6425	2794.4	413.63	0.30638	0.0056379	0.99436	0.011276	0.21684	FALSE
HGLibA_22171	HSD17B10	77.594/25.38/0	0/0/1.9843	5.7282	0.1752	-2.5173	2791.9	369.1	0.28904	0.0056458	0.99435	0.011292	0.21704	FALSE
HGLibA_40550	RBM42	42.22/4.7001/128.93	0/31.847/0	29.605	0.58361	-4.2725	5322	1907.6	0.66446	0.0056664	0.99433	0.011333	0.21767	FALSE
HGLibB_14844	EIF6	58.195/142.88/169.12	35.551/5.1843/0	112.05	2.5609	-4.9886	3554	7219.9	1.2885	0.0056718	0.99433	0.011344	0.21773	FALSE
HGLibB_41932	RPL41	19.398/0/7.5838	0/0/0	2.3652	0	-1.7507	161.48	152.41	0.19159	0.0056965	0.9943	0.011393	0.21857	FALSE
HGLibB_03083	ARPC4	475.83/369.43/706.81	64.221/91.837/58.536	499	70.154	-2.8129	30256	32153	2.3916	0.0057087	0.99429	0.011417	0.21891	FALSE
HGLibA_14719	EIF2A	45.644/15.98/52.328	0/43.696/0	33.686	0.65942	-4.3856	402.01	2170.5	0.70888	0.0057111	0.99429	0.011422	0.21895	FALSE
HGLibA_17530	FILIP1L	25.104/31.021/70.53	60.781/0/0	38.021	0.74754	-4.4809	636.33	2449.9	0.75306	0.0057931	0.99421	0.011586	0.22146	FALSE
HGLibA_62942	hsa-mir-652	25.104/21.62/61.429	41.285/0/0	32.195	0.64521	-4.3346	508.37	2074.5	0.69269	0.0058198	0.99418	0.01164	0.22216	FALSE
HGLibA_13637	DNAJC7	0/7.5201/39.436	0/0/0.99214	3.0116	0.12187	-1.8383	678.07	194.05	0.20744	0.0058278	0.99417	0.011656	0.22236	FALSE
HGLibA_04910	BTBD2	36.515/43.241/30.335	0/55.546/0	36.318	0.72252	-4.4373	41.879	2340.1	0.73581	0.0058432	0.99416	0.011686	0.22284	FALSE
HGLibB_47540	STRN3	43.361/25.38/31.852	0/43.696/0	32.73	0.65942	-4.3453	83.906	2109	0.69835	0.0058613	0.99414	0.011723	0.22349	FALSE
HGLibA_25564	KRT83	12.552/62.041/73.563	0/0/65.481	38.59	0.76881	-4.4843	1225.5	2486.6	0.75846	0.0058761	0.99412	0.011752	0.22388	FALSE
HGLibA_05756	C1orf116	127.8/43.241/47.02	1.1468/21.478/0	63.823	1.2908	-4.8226	2399.6	4112.5	0.97511	0.0058829	0.99412	0.011766	0.2241	FALSE
HGLibA_20874	HAUS1	4.5644/27.261/0	0/0/0	2.2369	0	-1.6946	318.3	144.14	0.18632	0.0058846	0.99412	0.011769	0.22413	FALSE
HGLibA_50761	TNFRSF14	31.95/12.22/97.073	0/47.4/0	33.629	0.68024	-4.3652	2243.2	2166.9	0.70781	0.0059014	0.9941	0.011803	0.22463	FALSE
HGLibA_57510	hsa-mir-127	38.797/23.5/27.302	34.404/0/0	29.2	0.60139	-4.2372	64.095	1881.5	0.65931	0.0059101	0.99409	0.01182	0.22468	FALSE
HGLibA_63697	hsa-mir-6878	15.975/13.16/39.436	16.055/0/0	20.25	0.44463	-3.8787	218.32	1304.8	0.54829	0.0059104	0.99409	0.011821	0.22468	FALSE
HGLibA_39392	PTMA	1.1411/43.241/62.946	9.1745/0/0	14.924	0.35265	-3.5573	1649	961.64	0.46989	0.0059163	0.99408	0.011833	0.22487	FALSE
HGLibA_01616	ALG13	253.32/141.94/121.34	0/42.956/29.764	163.41	4.9473	-4.7889	5157.4	10529	1.5443	0.0059547	0.99405	0.011909	0.22622	FALSE
HGLibA_24683	KIAA1024L	38.797/10.34/13.651	12.615/0/0	17.641	0.40285	-3.7321	258.4	1136.7	0.51129	0.0059604	0.99404	0.011921	0.22637	FALSE
HGLibA_28134	MAP1S	61.619/49.821/70.53	27.523/0.74062/0	60.049	1.2242	-4.7786	108.46	3869.3	0.94568	0.0059723	0.99403	0.011945	0.22653	FALSE
HGLibA_41381	RMND5A	6.8465/20.68/32.611	11.468/0/0	16.677	0.38725	-3.6715	183.28	1074.6	0.49692	0.0059799	0.99402	0.01196	0.22675	FALSE
HGLibA_57893	hsa-mir-150	2.2822/57.341/52.328	14.909/0/0	19.187	0.43143	-3.8179	1420	1236.3	0.53341	0.0059828	0.99402	0.011966	0.22679	FALSE
HGLibA_41868	RPL13	47.926/77.081/153.95	1.1468/0/54.568	82.863	1.796	-4.9066	3153.8	5339.3	1.1094	0.005997	0.994	0.011994	0.22725	FALSE
HGLibA_46025	SNX1	37.656/25.38/9.1006	17.202/0/0	20.586	0.45723	-3.8888	223.14	1326.5	0.55267	0.0059997	0.994	0.011999	0.22728	FALSE
HGLibB_06135	C2orf49	175.73/116.56/219.17	66.515/20.737/0	164.97	5.0777	-4.7712	2698.5	10630	1.5508	0.0060101	0.99399	0.01202	0.22754	FALSE
HGLibB_45600	SMC5	46.785/36.661/35.644	0/0/73.418	39.395	0.80254	-4.4861	38.076	2538.4	0.76598	0.0060164	0.99398	0.012033	0.2277	FALSE
HGLibA_43274	SEH1L	5.7054/14.1/109.97	0/17.775/0	20.757	0.46331	-3.8942	4114.5	1337.5	0.55491	0.0060398	0.99396	0.01208	0.2284	FALSE
HGLibB_53416	UXT	148.34/172.96/150.16	0/57.028/18.851	156.77	4.666	-4.7993	188.48	10101	1.5134	0.0060481	0.99395	0.012096	0.22868	FALSE
HGLibA_01724	ALS2CR11	195.13/112.8/144.09	9.1745/85.171/0	146.93	4.1924	-4.8323	1747.9	9467.3	1.4669	0.006076	0.99392	0.012152	0.22955	FALSE
HGLibB_13352	DLX1	17.116/55.461/30.335	41.285/0/0	30.663	0.64521	-4.2665	399.28	1975.8	0.67532	0.0060773	0.99392	0.012155	0.22956	FALSE
HGLibA_29040	MFAP1	54.772/18.8/31.852	0/0/45.639	32.02	0.67048	-4.305	346.23	2063.2	0.69017	0.0060784	0.99392	0.012157	0.22957	FALSE
HGLibB_48978	TET1	99.275/62.981/8.3422	0/66.656/0	37.444	0.77397	-4.4377	2661	2412.7	0.74655	0.0060859	0.99391	0.012172	0.22971	FALSE
HGLibA_57490	hsa-mir-1267	10.27/27.261/90.248	0/0/37.701	29.385	0.62305	-4.2266	2037.1	1893.5	0.66099	0.0060905	0.99391	0.012181	0.22985	FALSE
HGLibA_28865	MEIG1	46.785/28.201/25.785	0/47.4/0	32.406	0.68024	-4.3133	134.14	2088.1	0.69428	0.0061017	0.9939	0.012203	0.23023	FALSE
HGLibB_20476	GSTZ1	26.245/48.881/45.503	73.396/0/0	38.796	0.80245	-4.4646	152.11	2499.9	0.7599	0.0061038	0.9939	0.012208	0.23024	FALSE
HGLibA_20798	HACE1	18.257/18.8/64.463	34.404/0/0	28.09	0.60139	-4.1831	752.98	1810	0.64612	0.0061117	0.99389	0.012223	0.23046	FALSE
HGLibA_33974	OR4D2	152.91/40.421/86.456	8.0277/8.1468/0	81.163	1.7855	-4.8825	3417.5	5229.8	1.0976	0.0061206	0.99388	0.012241	0.23073	FALSE
HGLibA_05250	C12orf45	115.25/51.701/8.3422	0/65.174/0	36.849	0.76746	-4.4205	3590	2374.4	0.74047	0.0061255	0.99387	0.012251	0.23087	FALSE
HGLibB_35131	PARD3	0/10.34/32.611	1.1468/0/0	3.1444	0.13188	-1.8724	464.96	202.61	0.21164	0.006147	0.99385	0.012294	0.23157	FALSE
HGLibA_33273	ODC1	14.834/22.56/0	1.1468/0/0	3.1346	0.13188	-1.869	262.03	201.98	0.21128	0.0061584	0.99384	0.012317	0.23182	FALSE
HGLibA_17756	FNDC7	26.245/3.7601/0	0/0/0	2.0665	0	-1.6166	295.87	133.16	0.17908	0.0061609	0.99384	0.012322	0.23188	FALSE
HGLibA_58460	hsa-mir-3064	7.9876/38.541/46.261	0/0/25.796	24.279	0.5374	-4.0394	476.03	1564.4	0.60024	0.0061729	0.99383	0.012346	0.23218	FALSE
HGLibA_22782	IGBP1	100.42/17.86/0	2.2936/0/0	5.5517	0.18819	-2.4631	4590.8	357.73	0.28358	0.0061868	0.99381	0.012374	0.2326	FALSE
HGLibA_57551	hsa-mir-1273h	4.5644/20.68/0	0/0/0	2.0321	0	-1.6003	179.15	130.94	0.17759	0.0062208	0.99378	0.012442	0.23366	FALSE
HGLibA_47144	SSNA1	31.95/21.62/38.678	0/42.215/0	29.898	0.65076	-4.2263	74.906	1926.5	0.66635	0.0062673	0.99373	0.012535	0.23514	FALSE
HGLibA_63039	hsa-mir-6719	23.963/3.7601/0	0/0/0	2.0021	0	-1.586	244.69	129	0.17627	0.0062745	0.99373	0.012549	0.23538	FALSE
HGLibB_37475	POLG2	0/8.4602/10.617	0/0/0	1.9934	0	-1.5818	60.083	128.45	0.17589	0.0062902	0.99371	0.01258	0.23578	FALSE
HGLibB_29038	MFRP	15.975/51.701/12.893	0/22.219/0	22.017	0.50658	-3.9334	500.45	1418.7	0.5711	0.0063014	0.9937	0.012603	0.23609	FALSE
HGLibB_18685	GBA	171.16/91.182/293.49	27.523/60.731/0	166.09	5.4182	-4.7023	10935	10702	1.5531	0.006349	0.99365	0.012698	0.23761	FALSE
HGLibB_46709	SPOPL	34.233/31.961/12.893	27.523/0/0	24.173	0.55127	-4.0204	144.55	1557.6	0.59853	0.0063557	0.99364	0.012711	0.23783	FALSE
HGLibB_08196	CCT5	101.56/123.14/106.93	5.7341/41.475/0	110.17	2.7947	-4.8727	126.47	7099.1	1.2744	0.006358	0.99364	0.012716	0.23788	FALSE
HGLibA_32516	NPRL2	19.398/3.7601/97.832	0/0/17.859	19.361	0.46419	-3.7977	3200.5	1247.6	0.53501	0.0063932	0.99361	0.012786	0.23889	FALSE
HGLibA_23539	IQGAP3	96.992/210.56/269.23	0/114.8/20.835	176.51	6.1191	-4.6401	8039.5	11374	1.5977	0.0064142	0.99359	0.012828	0.23957	FALSE
HGLibB_19411	GNA11	0/6.5801/28.06	0/0/0.99214	2.5595	0.12187	-1.6658	336.5	164.93	0.18982	0.006416	0.99358	0.012832	0.23959	FALSE
HGLibB_44231	SKIV2L	170.02/109.04/142.58	14.909/45.918/0	138.27	4.0029	-4.799	940.52	8909.4	1.4225	0.0064274	0.99357	0.012855	0.23991	FALSE
HGLibA_42125	RPS27A	20.54/28.201/20.476	0/25.181/0	22.806	0.53231	-3.9576	19.832	1469.5	0.58104	0.0064363	0.99356	0.012873	0.24009	FALSE
HGLibA_49682	TM2D1	171.16/10.34/66.738	2.2936/6.6656/0	49.157	1.0743	-4.5957	8350.7	3167.4	0.85434	0.0064833	0.99352	0.012967	0.24158	FALSE
HGLibA_63320	hsa-mir-6786	84.441/48.881/102.38	0/28.884/1.9843	75.047	1.7213	-4.8045	760.04	4835.7	1.0545	0.0065015	0.9935	0.013003	0.24207	FALSE
HGLibB_43596	SETD4	22.822/11.28/53.087	28.67/0/0	23.929	0.56016	-3.9981	505.7	1541.9	0.59513	0.006513	0.99349	0.013026	0.24246	FALSE
HGLibA_23341	INPP4B	0/6.5801/11.376	0/0/0	1.8718	0	-1.5219	57.999	120.61	0.17044	0.0065221	0.99348	0.013044	0.24276	FALSE
HGLibA_41682	RNF41	2.2822/31.961/0	0/0/0	1.8693	0	-1.5207	454.58	120.45	0.17032	0.006527	0.99347	0.013054	0.24286	FALSE
HGLibB_04334	BCL6B	168.88/0/185.8	0/11.109/0	14.546	0.38216	-3.4915	26680	937.26	0.46264	0.0065356	0.99346	0.013071	0.24315	FALSE
HGLibA_04776	BRD3	41.079/31.021/0	0/2.2219/0	4.9417	0.18528	-2.3256	1005.2	318.42	0.26655	0.0065544	0.99345	0.013109	0.24377	FALSE
HGLibA_11675	CTR9	58.195/15.04/2.2752	0/8.8874/0	12.698	0.34793	-3.3452	1092.1	818.22	0.43176	0.0065663	0.99343	0.013133	0.24414	FALSE
HGLibA_08510	CDC14A	110.69/172.96/273.78	44.726/52.584/0	173.71	6.0811	-4.6249	6992.9	11193	1.5844	0.006574	0.99343	0.013148	0.24427	FALSE
HGLibA_07552	CCDC115	156.33/97.762/113	20.643/18.515/0	119.98	3.28	-4.821	931.83	7730.9	1.3272	0.006584	0.99342	0.013168	0.2446	FALSE
HGLibB_11193	CRNKL1	29.668/16.92/89.489	0/0/72.426	35.572	0.79846	-4.3459	1644.9	2292.1	0.72633	0.0065863	0.99341	0.013173	0.24465	FALSE
HGLibB_36641	PIN4	13.693/9.4002/80.389	0/24.44/0	21.83	0.52608	-3.903	1824.9	1406.6	0.56803	0.00659	0.99341	0.01318	0.24475	FALSE
HGLibA_08768	CDK3	52.49/0/62.187	3.4404/0/0	6.7934	0.22836	-2.6655	2601.4	437.74	0.31378	0.0065966	0.9934	0.013193	0.24496	FALSE
HGLibB_14024	DSTN	5.7054/15.04/49.295	0/0/13.89	16.214	0.41913	-3.6005	603.09	1044.7	0.48866	0.0066128	0.99339	0.013226	0.24541	FALSE
HGLibB_15283	EPHA7	4.5644/43.241/75.838	32.111/0/0	24.753	0.58549	-4.0218	1679.5	1595	0.60514	0.0066206	0.99338	0.013241	0.24566	FALSE
HGLibB_16046	FAM122B	63.901/121.26/68.255	6.8809/0/11.906	80.874	1.9313	-4.8038	1039.3	5211.2	1.0936	0.0066579	0.99334	0.013316	0.24678	FALSE
HGLibB_00515	ACP5	22.822/2.8201/0	0/0/0	1.7846	0	-1.4775	223.41	114.99	0.16642	0.0067027	0.9933	0.013405	0.24813	FALSE
HGLibB_38194	PPWD1	108.4/67.681/35.644	0/35.55/0.99214	63.96	1.4732	-4.7151	1395.4	4121.3	0.97335	0.006707	0.99329	0.013414	0.24821	FALSE
HGLibA_07232	CARD18	5.7054/84.602/46.261	0/44.437/0	28.255	0.66367	-4.1362	2003.8	1820.6	0.64664	0.0067139	0.99329	0.013428	0.24839	FALSE
HGLibB_19506	GNG7	101.56/21.62/0	0/0/2.9764	5.9441	0.21334	-2.5168	4711.4	383.01	0.29282	0.0067163	0.99328	0.013433	0.24844	FALSE
HGLibA_38013	PPP1R10	182.57/169.2/222.21	136.47/30.365/0	190.05	7.3654	-4.5134	762.26	12246	1.6508	0.006721	0.99328	0.013442	0.24854	FALSE
HGLibA_61874	hsa-mir-548ag-1	74.171/0/0.75838	0/0/0	1.7542	0	-1.4617	2624.1	113.04	0.165	0.0067686	0.99323	0.013537	0.24976	FALSE
HGLibB_28697	MED11	144.92/187.06/165.33	0/44.437/43.654	164.87	5.6976	-4.6303	445.41	10624	1.5443	0.0067834	0.99322	0.013567	0.25022	FALSE
HGLibB_03699	ATP6AP2	35.374/0/58.396	0/2.9625/0	5.8203	0.21287	-2.4914	1835.7	375.03	0.28955	0.0067921	0.99321	0.013584	0.25043	FALSE
HGLibB_37138	PLK1	14.834/33.841/28.06	0/0/32.741	24.157	0.58993	-3.984	97.96	1556.6	0.59735	0.0068071	0.99319	0.013614	0.25094	FALSE
HGLibB_14726	EIF2B5	4.5644/15.04/41.711	0/11.85/0	14.246	0.39255	-3.4527	424.34	917.97	0.45725	0.0068174	0.99318	0.013635	0.25125	FALSE
HGLibA_55041	ZCCHC6	138.07/36.661/0	4.5872/0/0	7.8787	0.26056	-2.8163	8920.3	507.67	0.33811	0.0068296	0.99317	0.013659	0.25146	FALSE
HGLibA_38845	PRR5-ARHGAP8	3.4233/16.92/0	0/0/0	1.7168	0	-1.4419	118.5	110.62	0.16323	0.0068525	0.99315	0.013705	0.25207	FALSE
HGLibB_03190	ASAH2B	76.453/35.721/0	3.4404/0/0	6.3968	0.22836	-2.5902	2904.3	412.18	0.30383	0.0068589	0.99314	0.013718	0.25226	FALSE
HGLibB_05811	C1orf194	136.93/149.46/57.637	24.083/10.369/0	105.67	2.8363	-4.7973	2601.1	6809	1.2462	0.0068605	0.99314	0.013721	0.25226	FALSE
HGLibA_58121	hsa-mir-1976	160.89/123.14/150.92	77.983/0/12.898	144.07	4.5645	-4.7043	383.96	9283	1.4479	0.0068641	0.99314	0.013728	0.25234	FALSE
HGLibB_36946	PLCD3	31.95/114.68/0	0/0/3.9686	7.0653	0.24394	-2.6968	6125.3	455.26	0.3197	0.0068693	0.99313	0.013739	0.2525	FALSE
HGLibA_26808	LOC100132247	1440.1/2037/1654.8	785.56/896.89/968.33	1693.2	880.34	-0.94283	91885	109100	2.4609	0.0069289	0.99307	0.013858	0.25416	FALSE
HGLibA_46251	SOX2	63.901/3.7601/27.302	20.643/0/0	18.817	0.49195	-3.7315	1165.6	1212.5	0.52627	0.0069296	0.99307	0.013859	0.25416	FALSE
HGLibA_30573	MUS81	0/1.88/28.06	0/0/0	1.6732	0	-1.4186	349.56	107.82	0.16115	0.0069535	0.99305	0.013907	0.25474	FALSE
HGLibB_48926	TELO2	28.527/10.34/85.697	0/53.325/0	29.389	0.71142	-4.1503	1767.1	1893.7	0.659	0.0069584	0.99304	0.013917	0.25487	FALSE
HGLibB_21862	HORMAD2	79.876/78.021/38.678	1.1468/0/31.749	62.241	1.4835	-4.6704	557.63	4010.5	0.95939	0.0069667	0.99303	0.013933	0.25506	FALSE
HGLibA_54172	WDR74	52.49/0.94002/0	0/0/0	1.6619	0	-1.4125	1293.4	107.09	0.1606	0.0069805	0.99302	0.013961	0.25544	FALSE
HGLibA_30985	NAA25	7.9876/6.5801/0	0/0/0	1.6547	0	-1.4085	33.552	106.62	0.16025	0.0069978	0.993	0.013996	0.25592	FALSE
HGLibB_31545	NECAB2	29.668/22.56/37.161	0/53.325/0	29.193	0.71142	-4.1409	53.852	1881	0.65669	0.006999	0.993	0.013998	0.25593	FALSE
HGLibA_30644	MYBL1	17.116/5.6401/59.912	19.496/0/0	18.001	0.48084	-3.6816	955.07	1159.9	0.51443	0.0070089	0.99299	0.014018	0.25621	FALSE
HGLibB_07029	CALML4	17.116/9.4002/32.611	18.349/0/0	17.39	0.46928	-3.6457	147.79	1120.5	0.50548	0.0070235	0.99298	0.014047	0.25647	FALSE
HGLibB_14688	EIF1AX	214.52/178.6/52.328	0/12.591/45.639	126.12	3.7719	-4.7355	8007.6	8126.6	1.3572	0.0070271	0.99297	0.014054	0.25649	FALSE
HGLibA_48204	TAF12	253.32/207.74/65.221	0/33.328/40.678	150.87	5.0465	-4.6506	10534	9721.1	1.479	0.0070276	0.99297	0.014055	0.25649	FALSE
HGLibB_36228	PGP	251.04/173.9/208.56	119.27/68.878/0	208.81	9.2727	-4.3522	1500.9	13455	1.7202	0.0070308	0.99297	0.014062	0.25654	FALSE
HGLibB_17809	FOXD2	26.245/50.761/37.919	95.185/0/0	36.971	0.88403	-4.333	153.06	2382.2	0.73936	0.0070406	0.99296	0.014081	0.25677	FALSE
HGLibB_42804	SCAP	201.97/51.701/90.248	20.643/9.628/0	98.057	2.6225	-4.7732	6504.2	6318.4	1.2006	0.0070408	0.99296	0.014082	0.25677	FALSE
HGLibA_40658	RBX1	57.054/6.5801/87.214	67.662/0/0	32.084	0.77834	-4.2175	2156.7	2067.4	0.68852	0.0070495	0.99295	0.014099	0.25702	FALSE
HGLibA_57706	hsa-mir-1302-5	0/39.481/60.671	3.4404/0/0	6.1191	0.22836	-2.535	2063.2	394.29	0.29666	0.0070576	0.99294	0.014115	0.25724	FALSE
HGLibB_02890	ARID3A	91.287/213.38/310.18	81.424/45.918/0	182.15	7.1123	-4.4968	12812	11737	1.6157	0.0070595	0.99294	0.014119	0.25727	FALSE
HGLibA_39833	RAB1B	7.9876/26.321/52.328	0/30.365/0	22.276	0.57288	-3.8873	561.84	1435.3	0.57285	0.0070627	0.99294	0.014125	0.25735	FALSE
HGLibA_04483	BHLHE41	22.822/46.061/50.812	0/101.46/0	37.667	0.90519	-4.3431	231.81	2427.1	0.7462	0.0070854	0.99291	0.014171	0.25802	FALSE
HGLibA_02977	ARL5B	0/2.8201/38.678	0/0/0.99214	2.1456	0.12187	-1.4874	669.82	138.25	0.17211	0.0071112	0.99289	0.014222	0.25888	FALSE
HGLibA_26596	LINS	45.644/29.141/44.745	112.39/0/0	39.045	0.94	-4.3675	87.063	2515.9	0.75969	0.0071144	0.99289	0.014229	0.25892	FALSE
HGLibB_30632	MYCL	4.5644/10.34/0	0/0/0	1.595	0	-1.3757	43.92	102.77	0.15733	0.0071454	0.99285	0.014291	0.25969	FALSE
HGLibB_26626	LMAN2	75.312/0/69.771	0/5.1843/0	7.9769	0.27526	-2.8154	4208.1	514	0.33971	0.0071566	0.99284	0.014313	0.26002	FALSE
HGLibA_05711	C19orf80	119.81/152.28/93.281	19.496/24.44/0	119.4	3.5365	-4.7301	881.85	7693.4	1.3209	0.0071665	0.99283	0.014333	0.26026	FALSE
HGLibB_42278	RSPH3	20.54/82.722/4.5503	0/25.181/0	19.858	0.53231	-3.7668	2093.3	1279.5	0.54026	0.0071909	0.99281	0.014382	0.26095	FALSE
HGLibA_27060	LPAR3	60.478/5.6401/72.805	0/57.768/0	29.276	0.73332	-4.1266	1713.5	1886.4	0.65717	0.0071977	0.9928	0.014395	0.26107	FALSE
HGLibA_51001	TOP3A	26.245/24.44/21.993	37.845/0/0	24.163	0.62396	-3.9537	4.5601	1557	0.59656	0.0072003	0.9928	0.014401	0.26109	FALSE
HGLibB_04062	BACH1	59.337/32.901/10.617	50.46/0/0	27.499	0.69665	-4.0701	663.91	1771.9	0.63672	0.0072153	0.99278	0.014431	0.26147	FALSE
HGLibA_40784	REEP4	54.772/7.5201/6.0671	0/12.591/0	13.613	0.40253	-3.3811	894.07	877.16	0.44604	0.0072273	0.99277	0.014455	0.26178	FALSE
HGLibB_56671	ZNF781	112.97/144.76/56.12	16.055/0/12.898	97.189	2.6589	-4.7461	2099.4	6262.4	1.1945	0.007229	0.99277	0.014458	0.26178	FALSE
HGLibB_10906	CPEB1	128.94/62.041/37.919	18.349/2.9625/0	67.204	1.6811	-4.669	2348	4330.3	0.99571	0.007241	0.99276	0.014482	0.26213	FALSE
HGLibB_39646	PYGO2	12.552/13.16/94.04	0/0/41.67	24.99	0.64752	-3.9796	2531.3	1610.2	0.60662	0.0072678	0.99273	0.014536	0.26294	FALSE
HGLibB_15770	EXOSC8	70.747/99.642/266.19	14.909/38.512/0	123.36	3.7698	-4.7044	11866	7948.7	1.3414	0.0072735	0.99273	0.014547	0.26309	FALSE
HGLibA_64298	hsa-mir-92b	11.411/3.7601/0	0/0/0	1.544	0	-1.3471	52.325	99.488	0.1548	0.0072783	0.99272	0.014557	0.26316	FALSE
HGLibA_62227	hsa-mir-567	14.834/67.681/61.429	0/0/124.02	39.539	0.97468	-4.3596	940.75	2547.7	0.76403	0.007291	0.99271	0.014582	0.26346	FALSE
HGLibA_02988	ARL6IP1	0/23.5/87.214	3.4404/0/0	5.8066	0.22836	-2.4702	3487	374.15	0.28838	0.0072983	0.9927	0.014597	0.26364	FALSE
HGLibA_03442	ATF5	11.411/47.941/34.127	48.166/0/0	26.55	0.68442	-4.0317	372.09	1710.8	0.62536	0.0073029	0.9927	0.014606	0.26377	FALSE
HGLibB_41667	RNMT	222.51/148.52/251.03	125/60.731/0	202.44	9.0298	-4.3422	2835.3	13044	1.6934	0.0073093	0.99269	0.014619	0.26396	FALSE
HGLibA_22553	IDI1	52.49/70.501/133.48	0/6.6656/14.882	79.056	2.0642	-4.7074	1870.2	5094	1.0787	0.0073301	0.99267	0.01466	0.26451	FALSE
HGLibA_57067	ZWILCH	31.95/28.201/19.718	47.019/0/0	26.096	0.67815	-4.0131	39.692	1681.5	0.61985	0.007342	0.99266	0.014684	0.26482	FALSE
HGLibA_31517	NDUFB4	28.527/11.28/46.261	0/41.475/0	24.619	0.64635	-3.9599	330.8	1586.3	0.60189	0.0073454	0.99265	0.014691	0.26486	FALSE
HGLibB_11836	CXCL11	21.681/33.841/0	0/2.2219/0	4.0969	0.18528	-2.1044	605.33	263.99	0.24075	0.0073612	0.99264	0.014722	0.26531	FALSE
HGLibB_52585	UBE2QL1	46.785/20.68/8.3422	0/27.403/0	20.086	0.55032	-3.7656	425.55	1294.2	0.54302	0.0073685	0.99263	0.014737	0.26553	FALSE
HGLibA_04691	BOLL	42.22/15.98/6.0671	0/0/17.859	16.03	0.46419	-3.5399	392.59	1032.9	0.48433	0.0073893	0.99261	0.014779	0.26609	FALSE
HGLibA_30600	MVP	99.275/85.542/159.26	34.404/0/10.914	110.59	3.262	-4.7105	1562.1	7126	1.2714	0.0074063	0.99259	0.014813	0.26656	FALSE
HGLibB_50722	TNFRSF4	38.797/0.94002/0	0/0/0	1.4934	0	-1.3181	697.05	96.227	0.15224	0.0074168	0.99258	0.014834	0.26683	FALSE
HGLibA_10143	CLTA	34.233/5.6401/68.255	0/39.253/0	23.694	0.63281	-3.9187	1211.3	1526.7	0.5902	0.0074219	0.99258	0.014844	0.26687	FALSE
HGLibB_45836	SNAPC2	205.4/185.18/47.778	21.789/26.662/0	122.06	3.7838	-4.6851	8223.7	7865	1.3337	0.0074234	0.99258	0.014847	0.26687	FALSE
HGLibB_12326	DARS	59.337/100.58/163.81	5.7341/42.215/0	99.258	2.8118	-4.7171	2881.3	6395.8	1.206	0.0074327	0.99257	0.014865	0.26706	FALSE
HGLibB_17095	FBXO48	49.067/64.861/3.0335	32.111/0/0	21.45	0.58549	-3.8237	1493.2	1382.2	0.56122	0.0074418	0.99256	0.014884	0.26725	FALSE
HGLibB_28022	MAN1B1	68.465/36.661/0	0/0/3.9686	6.2168	0.24394	-2.5364	2420.2	400.58	0.29843	0.0074636	0.99254	0.014927	0.26783	FALSE
HGLibA_45991	SNRPG	128.94/124.08/155.47	87.158/0/10.914	135.49	4.4805	-4.6384	286.07	8730.6	1.4021	0.0074693	0.99253	0.014939	0.26798	FALSE
HGLibB_02936	ARL14EP	44.502/41.361/0	3.4404/0/0	5.5973	0.22836	-2.4251	1412	360.66	0.28271	0.0074708	0.99253	0.014942	0.26798	FALSE
HGLibA_13688	DNM2	142.64/90.242/0	9.1745/0/0	10.784	0.35265	-3.123	11907	694.9	0.39573	0.0074712	0.99253	0.014942	0.26798	FALSE
HGLibA_64304	hsa-mir-93	39.938/63.921/4.5503	36.698/0/0	22.743	0.6166	-3.8765	1161.1	1465.5	0.578	0.0074771	0.99252	0.014954	0.26815	FALSE
HGLibA_13515	DNAJA3	93.569/31.961/58.396	0/31.847/0.99214	55.905	1.4167	-4.5575	999.06	3602.3	0.90786	0.0074854	0.99251	0.014971	0.26837	FALSE
HGLibA_55556	ZNF19	10.27/32.901/63.704	57.341/0/0	27.85	0.73126	-4.0587	810.05	1794.5	0.64017	0.0074939	0.99251	0.014988	0.26864	FALSE
HGLibA_13808	DPAGT1	126.66/168.26/165.33	34.404/49.621/0	152.17	5.4566	-4.5682	541.42	9805.1	1.4816	0.007507	0.99249	0.015014	0.26894	FALSE
HGLibA_30308	MT4	107.26/51.701/65.979	6.8809/11.109/0	71.528	1.8853	-4.6517	850.41	4609	1.0258	0.0075564	0.99244	0.015113	0.27039	FALSE
HGLibA_41864	RPL12	33.092/113.74/113.76	12.615/7.4062/0	75.391	2.0212	-4.6602	2366	4857.9	1.0527	0.0076092	0.99239	0.015218	0.27199	FALSE
HGLibA_09310	CGB7	26.245/22.56/49.295	0/0/75.403	30.795	0.81059	-4.1343	215.38	1984.3	0.67312	0.0076158	0.99238	0.015232	0.27219	FALSE
HGLibB_03635	ATP5A1	192.84/341.23/168.36	185.78/82.949/0	222.93	11.457	-4.168	8938.4	14365	1.7644	0.0076284	0.99237	0.015257	0.27248	FALSE
HGLibA_39775	R3HDM2	12.552/24.44/34.886	0/36.29/0	22.047	0.61394	-3.8359	130.36	1420.6	0.56865	0.0076348	0.99237	0.01527	0.27262	FALSE
HGLibB_05943	C1QTNF5	47.926/10.34/8.3422	19.496/0/0	16.076	0.48084	-3.5275	553.55	1035.9	0.48455	0.0076388	0.99236	0.015278	0.27272	FALSE
HGLibB_03994	B3GNT6	39.938/1.88/0	0/0/0.99214	1.894	0.12187	-1.3671	725.47	122.04	0.16041	0.0076414	0.99236	0.015283	0.27278	FALSE
HGLibA_56479	ZNF662	125.52/151.34/155.47	0/112.57/11.906	143.47	5.0334	-4.5817	264.07	9244.8	1.4398	0.0076505	0.99235	0.015301	0.27302	FALSE
HGLibB_08922	CEACAM19	131.23/119.38/83.422	48.166/8.1468/0	109.33	3.3144	-4.6766	625.81	7045	1.2631	0.0076563	0.99234	0.015313	0.27319	FALSE
HGLibB_11070	CRCP	0/43.241/147.13	0/6.6656/0	8.5092	0.30748	-2.8625	10247	548.29	0.35027	0.0076583	0.99234	0.015317	0.27322	FALSE
HGLibB_08708	CDIPT	149.48/128.78/141.82	59.634/19.997/0	139.76	4.8331	-4.5929	109.63	9005.7	1.4218	0.0076697	0.99233	0.015339	0.27354	FALSE
HGLibB_19977	GPR25	35.374/2.8201/88.731	33.257/0/0	20.855	0.59353	-3.7777	2571.6	1343.8	0.55272	0.0077162	0.99228	0.015432	0.27471	FALSE
HGLibA_21233	HGC6.3	95.851/0/116.79	9.1745/0/0	10.29	0.35265	-3.0612	9384.6	663.04	0.38592	0.0077189	0.99228	0.015438	0.27477	FALSE
HGLibA_28538	MBTPS2	116.39/195.52/192.63	27.523/97.762/0	163.66	6.3659	-4.4825	2044.4	10546	1.5317	0.0077237	0.99228	0.015447	0.27485	FALSE
HGLibB_20934	HCFC1R1	96.992/109.98/150.16	14.909/36.29/0	117.01	3.6941	-4.6519	774.53	7539.4	1.305	0.0077312	0.99227	0.015462	0.27506	FALSE
HGLibA_51839	TSEN54	78.735/115.62/94.798	13.762/0/16.866	95.208	2.7651	-4.6754	344.13	6134.8	1.1803	0.0077402	0.99226	0.01548	0.27526	FALSE
HGLibA_31174	NAT16	87.864/81.782/87.214	9.1745/0/16.866	85.576	2.4059	-4.6679	11.158	5514.1	1.12	0.0077427	0.99226	0.015485	0.27526	FALSE
HGLibA_34797	OVGP1	235.06/329.95/52.328	48.166/0/49.607	159.55	6.1137	-4.4963	23117	10281	1.5133	0.0077602	0.99224	0.01552	0.27558	FALSE
HGLibA_07800	CCDC53	92.428/14.1/11.376	48.166/0/0	24.605	0.68442	-3.9261	2442.7	1585.4	0.60075	0.0077839	0.99222	0.015568	0.27617	FALSE
HGLibB_40461	RBM23	4.5644/15.04/35.644	14.909/0/0	13.516	0.43143	-3.3421	286.06	870.9	0.44337	0.0077884	0.99221	0.015577	0.27629	FALSE
HGLibA_28841	MEF2D	2.2822/13.16/0	0/0/0	1.3673	0	-1.2432	70.89	88.101	0.14567	0.0077949	0.99221	0.01559	0.2764	FALSE
HGLibA_26878	LOC100862671	25.104/61.101/0.75838	10.321/0/0	10.881	0.37059	-3.1158	1413.4	701.12	0.39694	0.0078037	0.9922	0.015607	0.27655	FALSE
HGLibB_36063	PEX26	0/47.001/31.852	3.4404/0/0	5.2192	0.22836	-2.34	1241.1	336.3	0.27215	0.0078085	0.99219	0.015617	0.27662	FALSE
HGLibB_56835	ZNF90	41.079/12.22/0.75838	5.7341/0/0	7.4798	0.28784	-2.7191	598.28	481.97	0.3276	0.0078104	0.99219	0.015621	0.27662	FALSE
HGLibB_08678	CDH6	168.88/180.48/204.76	73.396/71.84/0	184.12	7.9862	-4.3646	335.81	11864	1.6171	0.0078105	0.99219	0.015621	0.27662	FALSE
HGLibA_26239	LDLR	773.66/932.5/664.34	275.23/174.79/295.66	782.58	242.29	-1.6874	18267	50426	2.406	0.0078194	0.99218	0.015639	0.27682	FALSE
HGLibA_59797	hsa-mir-4273	0/31.021/54.604	0/3.7031/0	5.4423	0.23629	-2.3816	1550.4	350.68	0.278	0.0078694	0.99213	0.015739	0.27834	FALSE
HGLibA_52092	TTC27	76.453/7.5201/25.027	0/48.881/0	24.373	0.68827	-3.9097	1498.4	1570.5	0.59766	0.0078897	0.99211	0.015779	0.27893	FALSE
HGLibB_20541	GTF2IRD1	179.15/186.12/203.25	60.781/105.17/0	189.24	8.5217	-4.3205	153.85	12194	1.6366	0.0079147	0.99209	0.015829	0.27969	FALSE
HGLibB_21806	HNRNPL	256.74/179.54/106.93	35.551/100.72/0	170.19	7.0102	-4.4177	5790.3	10967	1.5583	0.0079392	0.99206	0.015878	0.28031	FALSE
HGLibA_58767	hsa-mir-3173	14.834/4.7001/51.57	0/19.997/0	15.372	0.48574	-3.462	712.23	990.53	0.473	0.00798	0.99202	0.01596	0.28158	FALSE
HGLibB_08950	CEBPA	79.876/164.5/113	37.845/14.072/0	114.09	3.6745	-4.6218	1856.7	7351.3	1.2878	0.0079893	0.99201	0.015979	0.28183	FALSE
HGLibA_32230	NOA1	0/31.021/43.228	3.4404/0/0	5.0279	0.22836	-2.2949	1080.1	323.97	0.26665	0.0079939	0.99201	0.015988	0.28194	FALSE
HGLibA_00874	ADARB2	17.116/45.121/28.819	0/69.618/0	28.137	0.78671	-4.0275	205.19	1813	0.64233	0.0079948	0.99201	0.01599	0.28194	FALSE
HGLibA_09060	CENPI	23.963/76.141/47.02	19.496/0/0.99214	44.116	1.1887	-4.3655	720.1	2842.6	0.80514	0.0080076	0.99199	0.016015	0.28235	FALSE
HGLibB_56017	ZNF486	52.49/101.52/78.872	0/13.331/7.9371	74.91	2.1101	-4.6093	613.27	4826.9	1.0479	0.0080117	0.99199	0.016023	0.28241	FALSE
HGLibA_32008	NKD1	20.54/6.5801/89.489	0/45.178/0	23.016	0.66788	-3.8479	2347.5	1483.1	0.58031	0.0080238	0.99198	0.016048	0.28263	FALSE
HGLibB_39036	PSMA6	18.257/47.001/23.51	65.368/0/0	27.23	0.76831	-3.9968	242.61	1754.6	0.63173	0.0080288	0.99197	0.016058	0.28272	FALSE
HGLibB_56440	ZNF672	45.644/91.182/122.1	4.5872/28.884/0	79.809	2.2861	-4.6201	1542.6	5142.5	1.081	0.0080359	0.99196	0.016072	0.28289	FALSE
HGLibA_31947	NIP7	0/24.44/38.678	0/0/2.9764	4.4655	0.21334	-2.1714	794.7	287.74	0.25068	0.0080396	0.99196	0.016079	0.28298	FALSE
HGLibB_47286	STAP1	5.7054/0/61.429	0/0/1.9843	3.1934	0.1752	-1.8352	1704	205.77	0.2104	0.0080936	0.99191	0.016187	0.28458	FALSE
HGLibB_24900	KIF3A	254.46/188.94/96.315	41.285/82.209/0	166.69	6.8839	-4.4107	6576	10741	1.542	0.0081025	0.9919	0.016205	0.28485	FALSE
HGLibB_53023	UPP2	25.104/19.74/0	2.2936/0/0	3.5842	0.18819	-1.9479	368.48	230.95	0.22346	0.0081112	0.99189	0.016222	0.28508	FALSE
HGLibB_52452	UBA2	87.864/128.78/108.45	16.055/26.662/0	107.06	3.4098	-4.615	421.14	6898.6	1.248	0.0081284	0.99187	0.016257	0.28542	FALSE
HGLibB_43040	SDAD1	171.16/93.062/46.261	14.909/14.812/0	90.338	2.7181	-4.6186	4241.4	5821	1.1484	0.0081652	0.99183	0.01633	0.28639	FALSE
HGLibA_57932	hsa-mir-155	41.079/15.04/42.47	83.717/0/0	29.729	0.84285	-4.0596	253.45	1915.6	0.65999	0.0081697	0.99183	0.016339	0.28646	FALSE
HGLibB_03410	ATAD3B	20.54/28.201/46.261	0/0/85.324	29.93	0.84884	-4.0643	178.94	1928.5	0.66221	0.0081798	0.99182	0.01636	0.28675	FALSE
HGLibA_31909	NHP2	92.428/34.781/43.228	42.432/0.74062/0	51.805	1.4291	-4.4422	1006.8	3338.1	0.87191	0.0081892	0.99181	0.016378	0.28697	FALSE
HGLibB_50106	TMEM199	117.53/59.221/187.32	8.0277/0/59.529	109.26	3.5459	-4.6002	4333	7040.1	1.2599	0.0082141	0.99179	0.016428	0.28755	FALSE
HGLibA_51921	TSPAN2	127.8/49.821/121.34	0/34.809/6.945	91.77	2.8081	-4.6065	1966.2	5913.3	1.1569	0.0082654	0.99173	0.016531	0.28901	FALSE
HGLibA_36980	PLCB2	89.005/120.32/157.74	35.551/19.997/0	119.1	4.0534	-4.5709	1200.3	7674.3	1.3133	0.0082782	0.99172	0.016556	0.28937	FALSE
HGLibB_07341	CAST	143.78/138.18/162.29	27.523/71.099/0	147.73	5.7155	-4.4691	159.44	9519.4	1.4556	0.0083009	0.9917	0.016602	0.29003	FALSE
HGLibB_12649	DDX19A	30.809/0/61.429	0/4.4437/0	5.6507	0.25684	-2.4037	1888.1	364.11	0.28268	0.0083536	0.99165	0.016707	0.29143	FALSE
HGLibB_46635	SPINK2	36.515/2.8201/76.597	0/37.772/0	20.065	0.6235	-3.6977	1881.9	1292.9	0.5407	0.0083597	0.99164	0.016719	0.29154	FALSE
HGLibB_33263	OGFOD1	1.1411/17.86/0	0/0/0	1.2063	0	-1.1416	139.41	77.728	0.13682	0.0083615	0.99164	0.016723	0.29156	FALSE
HGLibB_31631	NELFB	175.73/56.401/230.55	38.992/29.625/0	131.74	4.7798	-4.5214	8687.3	8488.4	1.378	0.0083652	0.99163	0.01673	0.2916	FALSE
HGLibA_51991	TSPYL6	23.963/45.121/0	3.4404/0/0	4.6741	0.22836	-2.2077	1014.9	301.18	0.25617	0.0083663	0.99163	0.016733	0.2916	FALSE
HGLibB_43433	SERINC2	41.079/10.34/0	2.2936/0/0	3.4032	0.18819	-1.8898	739.59	219.29	0.21711	0.0083688	0.99163	0.016738	0.29164	FALSE
HGLibA_57634	hsa-mir-129-2	179.15/34.781/0	0/8.1468/0	8.451	0.33527	-2.8233	14952	544.54	0.34778	0.008391	0.99161	0.016782	0.29228	FALSE
HGLibA_46291	SP140	61.619/38.541/2.2752	29.817/0/0	17.726	0.56882	-3.5773	1299.3	1142.2	0.50766	0.0083957	0.9916	0.016791	0.29232	FALSE
HGLibA_18252	FYCO1	0/16.92/108.45	0/4.4437/0	5.5955	0.25684	-2.3917	5369.2	360.55	0.28116	0.0084059	0.99159	0.016812	0.29252	FALSE
HGLibB_01515	AKTIP	101.56/107.16/159.26	4.5872/0/165.69	120.12	4.1673	-4.5509	1022.2	7740.2	1.318	0.0084066	0.99159	0.016813	0.29252	FALSE
HGLibA_27287	LRRC24	25.104/0/0.75838	0/0/0	1.1934	0	-1.1331	286.66	76.894	0.13609	0.0084119	0.99159	0.016824	0.29259	FALSE
HGLibB_28027	MAN1C1	69.606/51.701/66.738	1.1468/54.065/0	62.16	1.7902	-4.5006	92.897	4005.3	0.9539	0.0084387	0.99156	0.016877	0.29335	FALSE
HGLibA_22322	HSPB9	0/55.461/31.852	0/4.4437/0	5.5203	0.25684	-2.3751	1609	355.7	0.27908	0.0084784	0.99152	0.016957	0.29421	FALSE
HGLibB_42841	SCFD1	44.502/107.16/36.402	1.1468/39.253/0	55.795	1.5993	-4.4496	1571.1	3595.2	0.90387	0.0084797	0.99152	0.016959	0.29422	FALSE
HGLibA_25098	KLHDC3	37.656/87.422/77.355	16.055/4.4437/0	63.392	1.8435	-4.5012	717.37	4084.7	0.96302	0.0085025	0.9915	0.017005	0.29493	FALSE
HGLibA_49723	TM9SF2	131.23/63.921/103.14	45.872/6.6656/0	95.291	3.0449	-4.5732	1168.5	6140.1	1.1772	0.0085315	0.99147	0.017063	0.29571	FALSE
HGLibB_41779	RPF2	45.644/137.24/116.79	25.23/0/9.9214	90.121	2.8389	-4.569	2455	5807	1.1454	0.0085635	0.99144	0.017127	0.29665	FALSE
HGLibA_63101	hsa-mir-6737	91.287/115.62/226	48.166/27.403/0	133.62	5.0012	-4.4875	5324.9	8610	1.3861	0.0085656	0.99143	0.017131	0.29668	FALSE
HGLibA_29327	MKI67IP	54.772/146.64/141.82	17.202/26.662/0	104.45	3.4909	-4.5534	2822.3	6730.2	1.2306	0.0086299	0.99137	0.01726	0.29835	FALSE
HGLibB_24008	KANSL2	76.453/93.062/51.57	13.762/8.1468/0	71.593	2.1527	-4.5252	442.72	4613.2	1.0224	0.0086363	0.99136	0.017273	0.29844	FALSE
HGLibA_62717	hsa-mir-619	0/0/189.6	0/0/0	1.1379	0	-1.0962	17760	73.321	0.13289	0.0086379	0.99136	0.017276	0.29845	FALSE
HGLibA_32641	NR6A1	101.56/269.79/210.83	0/71.84/84.332	179.44	8.3689	-4.2675	7606.9	11562	1.5909	0.0086415	0.99136	0.017283	0.2985	FALSE
HGLibA_05916	C1QB	86.723/13.16/11.376	0/0/58.536	23.54	0.73699	-3.8205	2123.9	1516.8	0.5855	0.0086969	0.9913	0.017394	0.29988	FALSE
HGLibA_53474	UVRAG	77.594/74.261/109.21	6.8809/31.847/0	85.695	2.7148	-4.5446	374.59	5521.8	1.1167	0.0087417	0.99126	0.017483	0.30125	FALSE
HGLibA_00756	ADAM21	5.7054/24.44/38.678	0/32.587/0	17.578	0.58885	-3.5475	316.62	1132.6	0.50481	0.0087488	0.99125	0.017498	0.30137	FALSE
HGLibB_53827	VTN	53.631/86.482/282.12	21.789/0/26.788	109.4	3.7898	-4.5266	16734	7049.2	1.2579	0.0087788	0.99122	0.017558	0.30223	FALSE
HGLibB_20491	GTF2A1	206.54/0.94002/62.946	0/62.212/0	23.74	0.75413	-3.818	17736	1529.7	0.5877	0.0088389	0.99116	0.017678	0.30381	FALSE
HGLibB_21752	HNF4A	526.04/245.34/600.64	43.579/76.284/70.442	426.4	61.641	-2.7704	36535	27475	2.2006	0.0088794	0.99112	0.017759	0.3049	FALSE
HGLibB_40420	RBL2	1.1411/38.541/30.335	14.909/0/0	11.243	0.43143	-3.0965	605.85	724.47	0.40169	0.0088827	0.99112	0.017765	0.30497	FALSE
HGLibB_17329	FGD4	87.864/120.32/171.39	22.936/42.215/0	121.92	4.5022	-4.4815	1805.1	7855.8	1.3247	0.0088979	0.9911	0.017796	0.30532	FALSE
HGLibA_19284	GLO1	26.245/35.721/0	0/3.7031/0	4.4528	0.23629	-2.141	736.21	286.92	0.24893	0.0089217	0.99108	0.017843	0.30595	FALSE
HGLibA_24398	KCNU1	37.656/91.182/87.214	26.377/3.7031/0	66.912	2.0594	-4.4723	928.56	4311.5	0.98767	0.0089415	0.99106	0.017883	0.30646	FALSE
HGLibA_14095	DTYMK	278.43/158.86/113.76	67.662/77.024/0	171.36	7.9549	-4.2666	7468.5	11042	1.5551	0.0089563	0.99104	0.017913	0.30686	FALSE
HGLibA_29144	MGAT4B	158.61/200.22/57.637	22.936/43.696/0	122.34	4.5553	-4.4727	5783.9	7883.2	1.3266	0.0089576	0.99104	0.017915	0.30686	FALSE
HGLibA_18753	GBX2	5.7054/34.781/89.489	0/79.987/0	26.176	0.82865	-3.8935	2250.8	1686.7	0.61719	0.0089584	0.99104	0.017917	0.30686	FALSE
HGLibA_29654	MORC3	28.527/39.481/8.3422	50.46/0/0	21.128	0.69665	-3.7051	277.53	1361.4	0.55374	0.0089704	0.99103	0.017941	0.30723	FALSE
HGLibA_51693	TRMT5	139.21/129.72/58.396	19.496/23.7/0	101.8	3.4995	-4.5139	2031.8	6559.2	1.2137	0.008975	0.99102	0.01795	0.3073	FALSE
HGLibB_10092	CLPP	73.03/112.8/133.48	47.019/10.369/0	103.22	3.5674	-4.5121	959.36	6650.9	1.2219	0.0089752	0.99102	0.01795	0.3073	FALSE
HGLibA_37588	POLR2I	49.067/28.201/32.611	1.1468/13.331/0	35.604	1.0875	-4.1321	122.51	2294.2	0.72063	0.008983	0.99102	0.017966	0.30748	FALSE
HGLibA_32075	NLGN4X	33.092/32.901/17.443	0/0/84.332	26.684	0.84515	-3.9073	82.55	1719.4	0.62314	0.0089905	0.99101	0.017981	0.30765	FALSE
HGLibB_13190	DHX8	95.851/89.302/131.96	18.349/0/27.78	104.14	3.619	-4.5087	531.36	6710.6	1.2271	0.0089926	0.99101	0.017985	0.30768	FALSE
HGLibB_17238	FDX1L	134.65/119.38/130.44	98.626/12.591/0	127.99	4.9038	-4.4495	62.218	8247.3	1.3554	0.0090008	0.991	0.018002	0.30792	FALSE
HGLibA_48440	TATDN1	26.245/24.44/31.852	0/89.615/0	27.339	0.86447	-3.9259	14.984	1761.6	0.63077	0.0090097	0.99099	0.018019	0.30807	FALSE
HGLibA_37199	PLK5	31.95/16.92/0	0/2.9625/0	3.6926	0.21287	-1.952	493.56	237.93	0.22559	0.0090121	0.99099	0.018024	0.30807	FALSE
HGLibA_20525	GTF2A2	150.62/86.482/119.07	0/24.44/32.741	115.76	4.2195	-4.4835	1041.8	7458.8	1.2915	0.0090126	0.99099	0.018025	0.30807	FALSE
HGLibB_49398	TIFA	74.171/53.581/53.087	0/22.959/2.9764	59.532	1.8215	-4.4232	145.62	3836	0.93179	0.0090126	0.99099	0.018025	0.30807	FALSE
HGLibB_10710	COPS5	0/42.301/43.228	0/5.1843/0	5.5848	0.27526	-2.3683	1398.1	359.86	0.27989	0.009021	0.99098	0.018042	0.30817	FALSE
HGLibA_33720	OR2A1	75.312/40.421/27.302	18.349/1.4812/0	43.649	1.3289	-4.2609	640.1	2812.5	0.79799	0.0090563	0.99094	0.018113	0.30923	FALSE
HGLibA_40499	RBM18	18.257/6.5801/81.147	0/0/53.576	21.418	0.71269	-3.7103	1898.9	1380.1	0.55735	0.0090784	0.99092	0.018157	0.30964	FALSE
HGLibB_06969	CADM4	57.054/58.281/118.31	12.615/11.109/0	73.278	2.3245	-4.4817	1257.9	4721.7	1.0326	0.0090804	0.99092	0.018161	0.30966	FALSE
HGLibA_54127	WDR55	172.3/115.62/125.13	0/25.922/64.489	135.59	5.4186	-4.4115	927.97	8737.1	1.3927	0.0090872	0.99091	0.018174	0.30985	FALSE
HGLibA_45185	SLC46A1	4.5644/20.68/0	0/1.4812/0	2.0321	0.151	-1.3975	179.15	130.94	0.16439	0.0090938	0.99091	0.018188	0.30993	FALSE
HGLibB_12860	DEFB124	68.465/88.362/190.35	0/10.369/52.584	104.83	3.7065	-4.4909	4454.1	6754.5	1.2304	0.0091303	0.99087	0.018261	0.3107	FALSE
HGLibA_50050	TMEM17	0/0/143.33	0/0/0	1.0278	0	-1.0199	10127	66.225	0.12629	0.0091398	0.99086	0.01828	0.31084	FALSE
HGLibB_47564	STX12	28.527/0/46.261	4.5872/0/0	5.0009	0.26056	-2.2511	1140.5	322.23	0.26407	0.0091539	0.99085	0.018308	0.31097	FALSE
HGLibA_40023	RABIF	322.93/153.22/204.01	115.83/180.71/0	216.12	12.698	-3.9865	7755.3	13926	1.7238	0.0091584	0.99084	0.018317	0.31108	FALSE
HGLibA_20547	GTF2H2	568.26/420.19/290.46	50.46/77.024/48.615	410.86	57.385	-2.8185	19679	26474	2.1725	0.0091811	0.99082	0.018362	0.31158	FALSE
HGLibA_47775	SUMO1	33.092/0.94002/118.31	0/30.365/0	15.889	0.57288	-3.4246	5504.5	1023.8	0.47867	0.0091879	0.99081	0.018376	0.31172	FALSE
HGLibA_41939	RPL32	0/0/139.54	0/0.74062/0	1.0177	0.10333	-0.87087	9595.6	65.578	0.11292	0.0091895	0.99081	0.018379	0.31172	FALSE
HGLibB_12722	DDX51	5.7054/38.541/46.261	0/57.028/0	21.728	0.72975	-3.7158	570.64	1400.1	0.56119	0.0091903	0.99081	0.018381	0.31172	FALSE
HGLibA_40587	RBMS1	45.644/155.1/131.96	8.0277/52.584/0	97.774	3.3985	-4.489	3586.4	6300.1	1.189	0.0092156	0.99078	0.018431	0.31236	FALSE
HGLibA_08173	CCRL1	214.52/71.441/50.812	5.7341/58.509/0	92.019	3.1457	-4.4878	8564.5	5929.3	1.1542	0.0092494	0.99075	0.018499	0.31319	FALSE
HGLibA_02646	ARF1	37.656/0/31.094	0/4.4437/0	4.8017	0.25684	-2.2067	896.86	309.4	0.25838	0.0092551	0.99074	0.01851	0.31324	FALSE
HGLibB_47001	SRRT	2.2822/14.1/103.9	0/28.144/0	15.109	0.5561	-3.3719	4024.6	973.55	0.46641	0.0092591	0.99074	0.018518	0.31326	FALSE
HGLibB_47847	SWT1	1.1411/18.8/23.51	0/9.628/0	8.1121	0.35991	-2.7443	199.96	522.71	0.33907	0.0092593	0.99074	0.018519	0.31326	FALSE
HGLibA_55989	ZNF436	33.092/65.801/3.0335	43.579/0/0	18.896	0.65874	-3.5843	1326.6	1217.5	0.52264	0.0092606	0.99074	0.018521	0.31326	FALSE
HGLibA_07554	CCDC115	556.85/362.85/603.67	94.038/159.97/52.584	495.93	92.495	-2.4101	16515	31956	2.2569	0.009268	0.99073	0.018536	0.31342	FALSE
HGLibA_12562	DCTPP1	172.3/97.762/49.295	0/13.331/27.78	94.005	3.2456	-4.484	4071.9	6057.3	1.1662	0.0092782	0.99072	0.018556	0.31368	FALSE
HGLibA_19645	GOLGA8O	123.24/52.641/34.886	13.762/5.9249/0	60.954	1.9289	-4.4028	2314	3927.6	0.94183	0.0093046	0.9907	0.018609	0.31435	FALSE
HGLibB_43199	SEC61B	126.66/49.821/78.872	127.3/1.4812/0	79.256	2.6209	-4.4702	1556.9	5106.9	1.0724	0.0093173	0.99068	0.018635	0.31473	FALSE
HGLibA_48829	TCP1	39.938/40.421/100.87	19.496/2.9625/0	54.615	1.7172	-4.3553	1278	3519.2	0.8917	0.0093253	0.99067	0.018651	0.31491	FALSE
HGLibB_13116	DHRS3	19.398/13.16/50.812	0/70.359/0	23.511	0.78984	-3.7756	434.68	1515	0.58376	0.0093337	0.99067	0.018667	0.31509	FALSE
HGLibB_45598	SMC4	14.834/0/0.75838	0/0/0	0.98631	0	-0.99009	96.394	63.554	0.12372	0.0093502	0.99065	0.0187	0.31553	FALSE
HGLibA_27400	LRRC59	45.644/240.64/109.21	75.689/8.1468/0	106.28	3.8685	-4.4617	10870	6848	1.2375	0.009354	0.99065	0.018708	0.3156	FALSE
HGLibA_41787	RP1	36.515/0/32.611	4.5872/0/0	4.8293	0.26056	-2.2093	899.55	311.18	0.25899	0.0093559	0.99064	0.018712	0.3156	FALSE
HGLibA_09280	CFL1	127.8/168.26/234.34	57.341/102.95/0	171.45	8.2962	-4.2134	2935.3	11047	1.5523	0.0093563	0.99064	0.018713	0.3156	FALSE
HGLibA_12320	DAP3	20.54/6.5801/53.087	47.019/0/0	19.328	0.67815	-3.5985	651.82	1245.4	0.52847	0.009368	0.99063	0.018736	0.31591	FALSE
HGLibB_41939	RPL7	71.889/0/28.06	0/5.9249/0	5.7744	0.29203	-2.3905	2450.5	372.08	0.28422	0.0093707	0.99063	0.018741	0.31591	FALSE
HGLibB_49452	TIMM22	28.527/77.081/49.295	2.2936/17.034/0	47.689	1.5007	-4.2832	616.84	3072.8	0.83322	0.0093721	0.99063	0.018744	0.31591	FALSE
HGLibB_51556	TRIML1	42.22/18.8/117.55	0/17.034/1.9843	45.385	1.4285	-4.2555	2962.2	2924.4	0.81284	0.0093729	0.99063	0.018746	0.31591	FALSE
HGLibB_52334	TXN	7.9876/8.4602/31.852	21.789/0/0	12.93	0.50267	-3.2126	201.23	833.13	0.43054	0.0093752	0.99062	0.01875	0.31591	FALSE
HGLibB_12532	DCTN2	27.386/213.38/139.54	9.1745/40.734/0	93.476	3.2582	-4.4716	10434	6023.2	1.1625	0.0093869	0.99061	0.018774	0.31606	FALSE
HGLibB_31791	NFKBIL1	68.465/57.341/54.604	38.992/0/1.9843	59.849	1.9122	-4.385	54.022	3856.4	0.93296	0.0094129	0.99059	0.018826	0.31671	FALSE
HGLibB_47367	STEAP1B	87.864/19.74/32.611	1.1468/18.515/0	38.405	1.224	-4.1471	1414.1	2474.6	0.74742	0.0094306	0.99057	0.018861	0.31721	FALSE
HGLibB_19830	GPR114	114.11/167.32/113	47.019/0/31.749	129.22	5.2141	-4.3892	971.67	8326.2	1.359	0.009447	0.99055	0.018894	0.31758	FALSE
HGLibA_02086	ANKRD36	41.079/75.201/70.53	10.321/0/7.9371	60.178	1.9308	-4.3836	348.82	3877.6	0.93539	0.0094481	0.99055	0.018896	0.31758	FALSE
HGLibB_19066	GIMAP8	0/37.601/93.281	8.0277/0/0	6.9611	0.33317	-2.5781	4219.2	448.54	0.31295	0.0094799	0.99052	0.01896	0.3185	FALSE
HGLibA_42096	RPS19	53.631/15.98/17.443	81.424/0/0	24.648	0.83417	-3.8056	483.53	1588.2	0.59755	0.0094841	0.99052	0.018968	0.31857	FALSE
HGLibA_02547	APOM	3.4233/16.92/27.302	0/0/18.851	11.7	0.47439	-3.1067	169.58	753.92	0.40885	0.0094998	0.9905	0.019	0.319	FALSE
HGLibB_12656	DDX20	93.569/131.6/172.15	99.772/14.812/0	128.46	5.2007	-4.384	1568.1	8277.7	1.3548	0.009511	0.99049	0.019022	0.31934	FALSE
HGLibB_02962	ARL3	66.183/20.68/3.0335	34.404/0/0	16.182	0.60139	-3.4235	1346.6	1042.7	0.4825	0.0095158	0.99048	0.019032	0.31945	FALSE
HGLibA_20601	GTPBP10	182.57/31.961/43.228	10.321/9.628/0	63.21	2.0643	-4.3892	7811.8	4073	0.9581	0.0095683	0.99043	0.019137	0.32094	FALSE
HGLibB_31637	NELFE	160.89/159.8/166.84	65.368/72.581/0	162.48	7.707	-4.2308	14.366	10470	1.5127	0.0095754	0.99042	0.019151	0.32109	FALSE
HGLibA_42546	S100A14	43.361/63.921/172.91	25.23/8.1468/0	78.273	2.6541	-4.4393	5190.6	5043.6	1.0648	0.0095858	0.99041	0.019172	0.3213	FALSE
HGLibA_18686	GATAD2A	191.7/119.38/194.15	95.185/53.325/0	164.4	7.8846	-4.2185	1828.4	10593	1.5207	0.0095976	0.9904	0.019195	0.32156	FALSE
HGLibB_32629	NRF1	6.8465/0/1.5168	0/0/0	0.93945	0	-0.95565	18.055	60.534	0.12075	0.0096046	0.9904	0.019209	0.32175	FALSE
HGLibB_40994	RGR	118.67/150.4/129.68	33.257/0/52.584	132.28	5.5013	-4.3576	260.16	8523.6	1.3732	0.009616	0.99038	0.019232	0.32204	FALSE
HGLibA_24500	KDM3A	0/58.281/72.805	9.1745/0/0	7.4222	0.35265	-2.6384	3458.3	478.25	0.32327	0.0096225	0.99038	0.019245	0.32217	FALSE
HGLibB_28496	MBTPS2	349.17/479.41/272.26	18.349/42.956/93.261	357.2	41.914	-3.0613	11107	23017	2.0782	0.0096605	0.99034	0.019321	0.32322	FALSE
HGLibB_05008	BZRAP1	108.4/67.681/119.82	4.5872/97.021/0	95.8	3.4706	-4.4365	763.34	6173	1.1752	0.0096851	0.99031	0.01937	0.32377	FALSE
HGLibA_45906	SNAPIN	42.22/125.02/161.54	38.992/11.109/0	94.845	3.4255	-4.4368	4063.8	6111.4	1.1694	0.0096879	0.99031	0.019376	0.32377	FALSE
HGLibA_58938	hsa-mir-320c-2	61.619/89.302/43.228	5.7341/0/16.866	61.965	2.0471	-4.369	549.25	3992.7	0.94824	0.0097031	0.9903	0.019406	0.32415	FALSE
HGLibB_15904	FABP6	39.938/128.78/0	0/10.369/0	7.9209	0.3713	-2.7016	7847.7	510.39	0.33417	0.0097061	0.99029	0.019412	0.3242	FALSE
HGLibA_26843	LOC100289561	41.079/140.06/190.35	9.1745/66.656/0	103.1	3.856	-4.4221	6412.8	6643.6	1.2177	0.0097378	0.99026	0.019476	0.32521	FALSE
HGLibB_37844	PPIA	101.56/0/0	0/0/0	0.90549	0	-0.93016	5066.2	58.346	0.11854	0.0098012	0.9902	0.019602	0.32684	FALSE
HGLibB_31179	NBPF1	67.324/65.801/40.953	12.615/0/5.9529	56.613	1.8744	-4.3251	222.2	3647.9	0.9063	0.0098037	0.9902	0.019607	0.32687	FALSE
HGLibB_20568	GTF3C6	117.53/124.08/232.82	58.487/58.509/0	150.31	6.9025	-4.259	4285.5	9685.1	1.4572	0.0098143	0.99019	0.019629	0.32709	FALSE
HGLibA_13156	DHRSX_X	592.22/492.57/344.31	110.09/97.762/50.599	464.84	81.669	-2.4944	15762	29952	2.214	0.0098333	0.99017	0.019667	0.32761	FALSE
HGLibA_31495	NDUFAF5	74.171/21.62/0	0/0/5.9529	5.3437	0.29263	-2.295	2515.3	344.33	0.27221	0.0098633	0.99014	0.019727	0.3283	FALSE
HGLibB_47553	STT3B	58.195/127.84/99.348	16.055/23.7/0	90.421	3.2752	-4.4185	1259.3	5826.3	1.1417	0.0098686	0.99013	0.019737	0.32834	FALSE
HGLibA_11733	CTSW	122.1/153.22/257.09	129.59/48.881/0	168.8	8.4963	-4.1604	5109.6	10877	1.5371	0.0098858	0.99011	0.019772	0.32874	FALSE
HGLibA_10464	COBLL1	6.8465/68.621/26.543	0/79.987/0	23.243	0.82865	-3.7287	1169.5	1497.7	0.57918	0.009888	0.99011	0.019776	0.32874	FALSE
HGLibB_04474	BHLHE22	21.681/15.98/30.335	0/0/70.442	21.908	0.79019	-3.6777	53.105	1411.7	0.56206	0.00989	0.99011	0.01978	0.32874	FALSE
HGLibA_20662	GUCY2C	168.88/127.84/295.01	82.57/128.13/0	185.37	10.096	-4.07	7801.2	11945	1.6038	0.0098986	0.9901	0.019797	0.32898	FALSE
HGLibA_13756	DOCK7	81.017/0/99.348	0/0/13.89	9.209	0.41913	-2.8468	6683.2	593.39	0.36084	0.0099046	0.9901	0.019809	0.32908	FALSE
HGLibA_63779	hsa-mir-708	43.361/47.001/56.12	21.789/2.2219/0	48.542	1.6193	-4.2414	43.323	3127.8	0.839	0.0099407	0.99006	0.019881	0.33005	FALSE
HGLibB_50819	TNNI3K	100.42/45.121/143.33	5.7341/0/57.544	86.611	3.1278	-4.4077	2564.8	5580.9	1.1175	0.0099644	0.99004	0.019929	0.33067	FALSE
HGLibA_15730	EXOC1	60.478/83.662/169.88	45.872/10.369/0	95.088	3.5374	-4.4044	3461	6127.1	1.1696	0.0099781	0.99002	0.019956	0.33098	FALSE
HGLibA_13540	DNAJB3	35.374/3.7601/18.201	27.523/0/0	13.483	0.55127	-3.2228	298	868.78	0.43873	0.0099784	0.99002	0.019957	0.33098	FALSE
HGLibB_29610	MORC2	51.349/54.521/52.328	5.7341/11.109/0	52.716	1.77	-4.2774	2.6385	3396.8	0.87413	0.0099844	0.99002	0.019969	0.33113	FALSE
HGLibA_48279	TAL1	0/0/92.523	0/0/0	0.87478	0	-0.90672	4200.4	56.367	0.11652	0.0099888	0.99001	0.019978	0.33119	FALSE
HGLibA_03085	ARPC4	22.822/215.26/313.97	16.055/0/66.473	115.64	4.6556	-4.3662	28938	7451.3	1.2857	0.0099926	0.99001	0.019985	0.33127	FALSE
HGLibB_01635	ALG8	109.54/105.28/247.23	3.4404/4.4437/16.866	141.81	6.3866	-4.273	6744.7	9137.6	1.4167	0.010006	0.98999	0.020013	0.33163	FALSE
HGLibB_47572	STX18	112.97/95.882/52.328	14.909/19.256/0	82.764	2.9741	-4.3976	1005.3	5332.9	1.0926	0.010036	0.98996	0.020072	0.33252	FALSE
HGLibA_27491	LRRTM3	27.386/22.56/0	0/0/3.9686	3.8639	0.24394	-1.9672	458.89	248.98	0.22942	0.010049	0.98995	0.020098	0.33281	FALSE
HGLibB_51540	TRIM72	35.374/68.621/155.47	6.8809/25.922/0	72.284	2.5287	-4.3763	4147.8	4657.6	1.0221	0.010058	0.98994	0.020116	0.33301	FALSE
HGLibA_01605	ALG10	21.681/81.782/49.295	1.1468/0/32.741	44.395	1.4998	-4.1826	968.85	2860.6	0.80201	0.010065	0.98994	0.020129	0.33314	FALSE
HGLibA_21145	HEPH	91.287/65.801/173.67	34.404/18.515/0	101.43	3.9048	-4.3843	3295.5	6535.6	1.2063	0.010097	0.9899	0.020194	0.33399	FALSE
HGLibB_21751	HNF4A	127.8/116.56/81.905	0/16.294/48.615	106.86	4.2064	-4.3727	577.72	6885.5	1.2371	0.010117	0.98988	0.020233	0.3345	FALSE
HGLibA_45552	SLU7	70.747/112.8/141.06	35.551/19.997/0	104.03	4.0534	-4.3774	1277.9	6703.3	1.2211	0.010121	0.98988	0.020243	0.33452	FALSE
HGLibB_22228	HSP90B1	82.158/36.661/100.87	5.7341/0/24.804	67.236	2.3401	-4.3526	1144.2	4332.4	0.98594	0.010125	0.98987	0.02025	0.33457	FALSE
HGLibB_08395	CD5	149.48/64.861/173.67	33.257/37.772/0	118.98	4.9177	-4.3416	3425.1	7666.5	1.3027	0.010126	0.98987	0.020252	0.33457	FALSE
HGLibA_36833	PKMYT1	191.7/144.76/131.2	34.404/11.109/0.99214	153.84	7.4031	-4.2037	1014.3	9913	1.4708	0.010138	0.98986	0.020276	0.33492	FALSE
HGLibB_22297	HSPBAP1	23.963/163.56/162.29	17.202/19.997/0	86.057	3.1639	-4.3859	7837.5	5545.1	1.1132	0.010167	0.98983	0.020334	0.3355	FALSE
HGLibA_21346	HIPK3	87.864/96.822/67.496	24.083/12.591/0	83.118	3.0309	-4.3833	227.18	5355.7	1.0943	0.010176	0.98982	0.020352	0.33568	FALSE
HGLibB_01590	ALDOA	78.735/82.722/96.315	13.762/0/24.804	85.604	3.1561	-4.3811	85.105	5516	1.1101	0.010211	0.98979	0.020422	0.33659	FALSE
HGLibA_18248	FYB	49.067/63.921/178.22	6.8809/42.956/0	82.39	3.0092	-4.3785	5317.5	5308.8	1.0895	0.010216	0.98978	0.020432	0.33671	FALSE
HGLibA_53962	WASH1	47.926/38.541/144.85	3.4404/0/36.709	64.453	2.2533	-4.3305	3704.3	4153	0.96517	0.01023	0.98977	0.02046	0.33703	FALSE
HGLibA_34411	OR6C76	100.42/144.76/201.73	0/122.2/24.804	143.14	6.6282	-4.24	2630.4	9223.2	1.4214	0.010239	0.98976	0.020479	0.3373	FALSE
HGLibA_55474	ZNF136	29.668/56.401/0	0/6.6656/0	5.42	0.30748	-2.2958	1608.2	349.24	0.27357	0.010272	0.98973	0.020545	0.33801	FALSE
HGLibB_50735	TNFSF10	11.411/0.94002/40.194	11.468/0/0	7.7427	0.38725	-2.6558	556.42	498.9	0.32931	0.010278	0.98972	0.020557	0.3381	FALSE
HGLibB_24524	KHDC1	0/83.662/75.838	0/13.331/0	8.5001	0.41212	-2.7501	5128	547.71	0.34559	0.01028	0.98972	0.02056	0.3381	FALSE
HGLibB_17751	FNTB	270.44/271.67/289.7	30.964/37.772/11.906	277.13	24.072	-3.4716	116.36	17857	1.8937	0.010281	0.98972	0.020562	0.3381	FALSE
HGLibA_15749	EXOC4	528.32/353.45/876.69	115.83/173.3/95.246	547.05	124.12	-2.131	73248	35250	2.2527	0.010373	0.98963	0.020746	0.34042	FALSE
HGLibA_56370	ZNF607	118.67/189.88/79.63	116.97/12.591/0	121.52	5.1964	-4.3055	3218.1	7830.5	1.3146	0.010377	0.98962	0.020753	0.34042	FALSE
HGLibA_60414	hsa-mir-4499	47.926/15.98/51.57	26.377/0.74062/0	34.072	1.2056	-3.9911	412.71	2195.4	0.70144	0.010377	0.98962	0.020755	0.34042	FALSE
HGLibB_10680	COPA	75.312/0/0	0/0/0	0.81022	0	-0.85617	2775.9	52.207	0.11213	0.010417	0.98958	0.020835	0.34128	FALSE
HGLibA_41147	RHCG	90.146/82.722/32.611	0/30.365/3.9686	62.43	2.2143	-4.3026	1034.6	4022.7	0.9494	0.010421	0.98958	0.020841	0.34128	FALSE
HGLibA_11654	CTNNBIP1	0/0/72.805	0/0/0	0.80002	0	-0.84801	2593	51.55	0.11143	0.01049	0.98951	0.02098	0.34328	FALSE
HGLibA_27846	MAD2L1	36.515/18.8/103.9	24.083/1.4812/0	41.496	1.4638	-4.1084	2217	2673.8	0.77418	0.010492	0.98951	0.020984	0.34329	FALSE
HGLibA_62647	hsa-mir-6125	51.349/42.301/0	8.0277/0/0	5.9198	0.33317	-2.3759	1711.2	381.45	0.28605	0.010526	0.98947	0.021051	0.34408	FALSE
HGLibB_41699	ROGDI	123.24/78.962/79.63	12.615/38.512/0	91.852	3.5617	-4.3473	650.29	5918.5	1.1476	0.010531	0.98947	0.021063	0.34412	FALSE
HGLibB_03559	ATP11C	158.61/190.82/290.46	157.11/148.12/0	206.39	13.158	-3.8727	4796.5	13299	1.6756	0.010544	0.98946	0.021088	0.34444	FALSE
HGLibA_14739	EIF2B2	128.94/194.58/123.62	0/33.328/109.14	145.84	7.0476	-4.1895	1577.7	9397.1	1.4317	0.010576	0.98942	0.021152	0.34524	FALSE
HGLibB_06292	C4orf17	26.245/4.7001/0	0/2.2219/0	2.2298	0.18528	-1.4462	293.9	143.68	0.17057	0.010578	0.98942	0.021156	0.34526	FALSE
HGLibB_36612	PIK3R5	69.606/0/0	0/0/0	0.78666	0	-0.83727	2368.7	50.689	0.11049	0.010587	0.98941	0.021174	0.34546	FALSE
HGLibA_28524	MBOAT4	69.606/0/0	0/0/0	0.78666	0	-0.83727	2368.7	50.689	0.11049	0.010587	0.98941	0.021174	0.34546	FALSE
HGLibA_36657	PIK3R4	33.092/87.422/105.42	10.321/0/15.874	67.325	2.4534	-4.3063	1513.3	4338.1	0.98492	0.010608	0.98939	0.021216	0.346	FALSE
HGLibB_06214	C3orf20	0/36.661/38.678	0/6.6656/0	5.1238	0.30748	-2.2276	1073.3	330.16	0.26507	0.010643	0.98936	0.021285	0.34699	FALSE
HGLibA_50667	TMSB4Y	46.785/141.94/140.3	127.3/0/4.9607	97.685	3.9098	-4.3291	3182.9	6294.4	1.182	0.010657	0.98934	0.021314	0.34712	FALSE
HGLibA_29895	MRPL11	18.257/0/2.2752	0/1.4812/0	1.5337	0.151	-1.1384	141.29	98.824	0.13909	0.01068	0.98932	0.02136	0.34778	FALSE
HGLibB_02681	ARFRP1	30.809/79.902/126.65	5.7341/0/29.764	67.828	2.4924	-4.3007	2488.1	4370.5	0.98828	0.010687	0.98931	0.021374	0.34788	FALSE
HGLibA_50112	TMEM184A	178.01/85.542/103.14	44.726/29.625/0	116.24	5.0076	-4.2866	2464.7	7490.2	1.2853	0.010692	0.98931	0.021384	0.34788	FALSE
HGLibB_30063	MRPS5	173.45/139.12/40.194	11.468/59.249/0	99.011	3.9947	-4.3236	5304.4	6379.8	1.1896	0.010693	0.98931	0.021386	0.34788	FALSE
HGLibA_62298	hsa-mir-5692c-1	66.183/0/0	0/0/0	0.7719	0	-0.8253	2139.9	49.738	0.10945	0.010697	0.9893	0.021394	0.34796	FALSE
HGLibA_39072	PSMA2	50.208/0/34.127	0/7.4062/0	5.4633	0.32183	-2.2897	1426.8	352.03	0.27403	0.010699	0.9893	0.021398	0.34798	FALSE
HGLibA_63246	hsa-mir-6770-1	1014.4/1022.7/903.99	305.05/476.22/445.47	978.85	401.48	-1.2836	4397.7	63073	2.299	0.010706	0.98929	0.021411	0.34809	FALSE
HGLibA_48900	TDRD10	58.195/52.641/56.12	6.8809/13.331/0	55.605	2.0087	-4.2337	7.8808	3582.9	0.89539	0.010723	0.98928	0.021447	0.34854	FALSE
HGLibA_57508	hsa-mir-1269b	0/0/65.221	0/0/0	0.76766	0	-0.82184	2077.7	49.465	0.10915	0.010729	0.98927	0.021458	0.34855	FALSE
HGLibB_39520	PTX3	34.233/60.161/101.62	8.0277/14.072/0	59.382	2.1584	-4.2569	1208.7	3826.3	0.9251	0.010737	0.98926	0.021474	0.34864	FALSE
HGLibB_56841	ZNF92	122.1/109.04/87.973	28.67/31.106/0	105.41	4.3778	-4.3065	297.84	6792.2	1.2259	0.010753	0.98925	0.021506	0.34896	FALSE
HGLibA_32204	NMT1	98.134/24.44/45.503	14.909/0/3.9686	47.805	1.7278	-4.1612	1542.1	3080.3	0.83021	0.010782	0.98922	0.021565	0.34964	FALSE
HGLibA_05367	C14orf39	109.54/40.421/80.389	6.8809/29.625/0	70.88	2.648	-4.3004	1256.6	4567.2	1.0096	0.010792	0.98921	0.021584	0.34985	FALSE
HGLibA_04712	BPIFA2	0/62.981/0	0/0/0	0.75763	0	-0.81363	1936.5	48.818	0.10843	0.010806	0.98919	0.021613	0.34999	FALSE
HGLibA_58580	hsa-mir-3131	0/0/62.946	0/0/0	0.75747	0	-0.8135	1934.3	48.808	0.10842	0.010808	0.98919	0.021615	0.34999	FALSE
HGLibA_08679	CDH4	0/62.041/0	0/0/0	0.75335	0	-0.81011	1878.7	48.542	0.10813	0.01084	0.98916	0.02168	0.35073	FALSE
HGLibB_15426	ERCC6L	36.515/0.94002/51.57	0/29.625/0	12.431	0.56738	-3.0991	1122	800.99	0.41918	0.010891	0.98911	0.021781	0.35191	FALSE
HGLibB_53714	VPS37B	60.478/0/0	0/0/0	0.74613	0	-0.80416	1784.5	48.077	0.10761	0.010897	0.9891	0.021794	0.35202	FALSE
HGLibB_41017	RGS16	60.478/0/0	0/0/0	0.74613	0	-0.80416	1784.5	48.077	0.10761	0.010897	0.9891	0.021794	0.35202	FALSE
HGLibA_02975	ARL5A	0/0/59.912	0/0/0	0.74349	0	-0.80198	1751	47.907	0.10742	0.010918	0.98908	0.021836	0.3526	FALSE
HGLibA_32617	NR2F6	67.324/0/64.463	12.615/0/0	7.4788	0.40285	-2.5955	3442.3	481.9	0.32233	0.010941	0.98906	0.021883	0.35323	FALSE
HGLibA_39905	RAB39B	23.963/37.601/28.06	0/16.294/0.99214	29.352	1.1143	-3.8435	49.377	1891.3	0.6493	0.010944	0.98906	0.021888	0.35323	FALSE
HGLibB_55092	ZFAND5	0/59.221/0	0/0/0	0.74024	0	-0.79929	1710.6	47.698	0.10718	0.010944	0.98906	0.021888	0.35323	FALSE
HGLibB_52890	UHRF2	0/31.021/58.396	8.0277/0/0	5.5675	0.33317	-2.3005	1734.8	358.74	0.27636	0.010945	0.98905	0.02189	0.35323	FALSE
HGLibA_07213	CAPZB	0/58.281/0	0/0/0	0.73578	0	-0.79558	1656.3	47.41	0.10686	0.01098	0.98902	0.02196	0.35397	FALSE
HGLibB_49573	TLN1	58.195/0/0	0/0/0	0.73537	0	-0.79524	1651.4	47.384	0.10683	0.010984	0.98902	0.021967	0.354	FALSE
HGLibA_63372	hsa-mir-6799	51.349/22.56/59.912	50.46/0.74062/0	41.106	1.5198	-4.0626	401.27	2648.7	0.76918	0.010998	0.989	0.021997	0.35429	FALSE
HGLibA_07301	CASP12	0/34.781/62.187	0/8.8874/0	5.9117	0.34793	-2.3583	2017.7	380.92	0.28507	0.011003	0.989	0.022006	0.35439	FALSE
HGLibA_50182	TMEM202	0/0/57.637	0/0/0	0.73269	0	-0.79302	1619.6	47.212	0.10663	0.011005	0.98899	0.022011	0.35442	FALSE
HGLibA_07045	CALR	47.926/40.421/40.953	5.7341/8.1468/0	42.969	1.5882	-4.0865	17.564	2768.7	0.78643	0.011014	0.98899	0.022027	0.35453	FALSE
HGLibA_61980	hsa-mir-548f-3	114.11/56.401/147.88	56.194/0/12.898	98.375	4.0826	-4.2892	2230.3	6338.8	1.1843	0.011034	0.98897	0.022068	0.35486	FALSE
HGLibB_03332	ASNS	0/0/56.879	0/0/0	0.72903	0	-0.78996	1576.9	46.976	0.10637	0.011035	0.98896	0.022071	0.35486	FALSE
HGLibA_39211	PSMG3	73.03/94.002/91.764	0/61.471/6.945	85.725	3.4136	-4.2964	133.08	5523.7	1.1075	0.011046	0.98895	0.022091	0.35505	FALSE
HGLibA_55140	ZER1	0/56.401/0	0/0/0	0.72671	0	-0.78802	1550.3	46.826	0.1062	0.011055	0.98895	0.022109	0.35524	FALSE
HGLibB_08768	CDK5R1	166.6/168.26/147.88	86.011/77.765/0	160.64	8.6525	-4.0658	128.15	10351	1.4939	0.011059	0.98894	0.022117	0.35532	FALSE
HGLibB_51780	TSG101	37.656/19.74/0.75838	16.055/0/0	8.5312	0.44463	-2.722	517.15	549.71	0.3449	0.011067	0.98893	0.022133	0.35553	FALSE
HGLibB_44870	SLC30A9	107.26/119.38/91.764	69.955/0/13.89	105.53	4.5106	-4.2729	192.2	6799.6	1.225	0.011073	0.98893	0.022146	0.35559	FALSE
HGLibA_13203	DHX57	136.93/56.401/0	0/0/17.859	9.0824	0.46419	-2.7837	9333.3	585.23	0.35625	0.011077	0.98892	0.022154	0.35566	FALSE
HGLibA_56180	ZNF532	94.71/0/43.228	12.615/0/0	7.3337	0.40285	-2.5706	4488.4	472.55	0.31883	0.011083	0.98892	0.022167	0.35575	FALSE
HGLibA_41942	RPL34	1.1411/8.4602/30.335	0/11.109/0	6.7636	0.38216	-2.4898	295.06	435.82	0.30568	0.011084	0.98892	0.022168	0.35575	FALSE
HGLibB_37712	POU2F3	30.809/91.182/186.56	9.1745/37.772/0	80.656	3.1749	-4.2897	6905.8	5197.1	1.0748	0.011088	0.98891	0.022175	0.35576	FALSE
HGLibA_59075	hsa-mir-3611	94.71/56.401/47.02	40.138/3.7031/0	63.098	2.3827	-4.244	651.35	4065.8	0.9522	0.011093	0.98891	0.022187	0.35576	FALSE
HGLibB_38412	PRH1	0/55.461/0	0/0/0	0.7221	0	-0.78417	1498.7	46.529	0.10586	0.011093	0.98891	0.022186	0.35576	FALSE
HGLibA_51598	TRIM7	0/0/55.362	0/0/0	0.72161	0	-0.78376	1493.3	46.497	0.10582	0.011097	0.9889	0.022194	0.35579	FALSE
HGLibA_16749	FAM83D	108.4/139.12/175.19	40.138/0/80.363	138.25	6.7667	-4.1642	1128	8908	1.3931	0.011101	0.9889	0.022201	0.35585	FALSE
HGLibA_19232	GLCE	101.56/168.26/74.322	43.579/25.181/0	108.3	4.6976	-4.2618	2397.8	6978.4	1.2402	0.011121	0.98888	0.022242	0.35634	FALSE
HGLibA_39411	PTPDC1	54.772/0/0	0/0/0	0.71869	0	-0.78131	1461.4	46.309	0.10561	0.011122	0.98888	0.022243	0.35634	FALSE
HGLibA_41032	RGPD3	0/0/54.604	0/0/0	0.71785	0	-0.7806	1452.4	46.255	0.10555	0.011129	0.98887	0.022257	0.3565	FALSE
HGLibB_28256	MAPKAP1	60.478/0/18.96	0/6.6656/0	4.7694	0.30748	-2.1416	1663.8	307.32	0.25452	0.011131	0.98887	0.022262	0.3565	FALSE
HGLibB_33031	NUP93	0/54.521/0	0/0/0	0.71744	0	-0.78026	1447.9	46.228	0.10552	0.011132	0.98887	0.022264	0.3565	FALSE
HGLibB_10714	COPS6	197.41/215.26/263.16	5.7341/15.553/47.623	223.62	16.234	-3.7042	1160.1	14409	1.7277	0.011134	0.98887	0.022267	0.3565	FALSE
HGLibA_37614	POLR3C	57.054/56.401/56.879	18.349/0/5.9529	56.777	2.1352	-4.2039	0.11432	3658.5	0.9034	0.011155	0.98885	0.02231	0.35702	FALSE
HGLibA_11844	CXCL10	0/73.321/34.127	0/0/9.9214	6.2105	0.36449	-2.4017	2660.9	400.18	0.29224	0.011169	0.98883	0.022339	0.35734	FALSE
HGLibA_13873	DPP4	132.37/48.881/223.72	0/61.471/21.827	113.14	5.03	-4.2425	8363.6	7290.5	1.2662	0.011189	0.98881	0.022379	0.35779	FALSE
HGLibA_63859	hsa-mir-7158	124.38/38.541/0	0/14.072/0	7.7351	0.42136	-2.6196	7307.3	498.42	0.3276	0.011194	0.98881	0.022388	0.35783	FALSE
HGLibB_04013	B4GALNT2	0/0/53.087	0/0/0	0.71022	0	-0.77418	1372.2	45.763	0.10499	0.011194	0.98881	0.022387	0.35783	FALSE
HGLibB_09593	CHRND	25.104/57.341/135.75	0/39.253/2.9764	58.055	2.1962	-4.2076	3561.5	3740.8	0.91329	0.011204	0.9888	0.022408	0.35806	FALSE
HGLibA_25832	KRTAP9-2	52.49/0/0	0/0/0	0.70718	0	-0.77161	1341.2	45.567	0.10476	0.01122	0.98878	0.022439	0.35842	FALSE
HGLibB_33936	OR4D6	0/0/52.328	0/0/0	0.70635	0	-0.77091	1332.9	45.514	0.1047	0.011227	0.98877	0.022454	0.35847	FALSE
HGLibA_47600	STRN4	0/26.321/87.214	0/9.628/0	6.033	0.35991	-2.3706	3519.2	388.74	0.28773	0.011236	0.98876	0.022472	0.3586	FALSE
HGLibA_45894	SNAPC2	330.92/214.32/459.58	98.626/29.625/15.874	319.44	35.957	-3.1161	15410	20583	1.9759	0.011239	0.98876	0.022478	0.35865	FALSE
HGLibA_19709	GP5	0/28.201/58.396	0/8.1468/0	5.3908	0.33527	-2.2589	1679.4	347.36	0.27126	0.011242	0.98876	0.022483	0.35869	FALSE
HGLibB_06140	C2orf50	21.681/0/21.235	0/4.4437/0	3.4952	0.25684	-1.8386	328.81	225.21	0.21579	0.011245	0.98876	0.02249	0.35875	FALSE
HGLibA_07955	CCKAR	50.208/31.021/0	0/0/7.9371	5.2897	0.33155	-2.2399	1353.9	340.84	0.26856	0.01125	0.98875	0.022501	0.35887	FALSE
HGLibB_05431	C15orf65	0/51.701/0	0/0/0	0.70312	0	-0.76818	1300.9	45.306	0.10446	0.011255	0.98875	0.02251	0.35892	FALSE
HGLibA_46720	SPINT4	0/51.701/0	0/0/0	0.70312	0	-0.76818	1300.9	45.306	0.10446	0.011255	0.98875	0.02251	0.35892	FALSE
HGLibB_54852	ZBTB7B	0/0/51.57	0/0/0	0.70244	0	-0.7676	1294.3	45.262	0.10441	0.011261	0.98874	0.022522	0.35906	FALSE
HGLibB_40819	REST	69.606/59.221/42.47	0/35.55/2.9764	55.944	2.1218	-4.1891	189.48	3604.8	0.89644	0.011263	0.98874	0.022526	0.35907	FALSE
HGLibB_26508	LIMS1	51.349/0/0	0/0/0	0.70129	0	-0.76663	1283.1	45.188	0.10432	0.011271	0.98873	0.022542	0.35914	FALSE
HGLibA_37929	PPIF	51.349/0/0	0/0/0	0.70129	0	-0.76663	1283.1	45.188	0.10432	0.011271	0.98873	0.022542	0.35914	FALSE
HGLibA_29939	MRPL27	51.349/0/0	0/0.74062/0	0.70129	0.10333	-0.62477	1283.1	45.188	0.088953	0.011271	0.98873	0.022542	0.35914	FALSE
HGLibA_40846	REPIN1	20.54/0/40.953	0/5.9249/0	4.2922	0.29203	-2.0342	813.2	276.57	0.24053	0.011284	0.98872	0.022568	0.35951	FALSE
HGLibB_40058	RAD9A	44.502/58.281/254.06	0/10.369/46.631	87.046	3.5573	-4.272	15265	5608.8	1.1148	0.011296	0.9887	0.022592	0.35971	FALSE
HGLibA_08852	CDNF	94.71/40.421/167.6	27.523/17.034/0	86.269	3.5173	-4.2719	4394.3	5558.8	1.1099	0.011297	0.9887	0.022593	0.35971	FALSE
HGLibA_41371	RMDN3	0/50.761/0	0/0/0	0.69823	0	-0.76403	1253.6	44.991	0.1041	0.011298	0.9887	0.022595	0.35971	FALSE
HGLibB_36095	PFDN2	47.926/105.28/0	0/14.812/0	7.8692	0.43029	-2.6325	5577.9	507.06	0.33035	0.011302	0.9887	0.022605	0.35981	FALSE
HGLibB_00973	ADIG	60.478/31.961/40.194	21.789/2.2219/0	42.674	1.6193	-4.0595	218.95	2749.7	0.78292	0.011308	0.98869	0.022617	0.35995	FALSE
HGLibA_34801	OVOL1	50.208/0/0	0/0/0	0.69533	0	-0.76156	1226.2	44.804	0.10388	0.011323	0.98868	0.022647	0.36029	FALSE
HGLibA_20779	H3F3A	42.22/25.38/66.738	0/6.6656/6.945	41.516	1.5829	-4.0409	448.5	2675.1	0.77208	0.011351	0.98865	0.022702	0.36107	FALSE
HGLibA_50909	TNRC18	0/0/49.295	0/0/0	0.69049	0	-0.75744	1181.7	44.492	0.10352	0.011366	0.98863	0.022733	0.36146	FALSE
HGLibB_47844	SWSAP1	90.146/93.062/112.24	20.643/37.772/0	98.015	4.1828	-4.2558	144.42	6315.6	1.1807	0.011371	0.98863	0.022743	0.36158	FALSE
HGLibA_16495	FAM218A	76.453/110.92/212.35	24.083/79.987/0	121.67	5.6857	-4.1976	5191.2	7839.9	1.3099	0.011375	0.98863	0.02275	0.36164	FALSE
HGLibB_37807	PPBP	0/0/48.537	0/0/0	0.68642	0	-0.75396	1145.3	44.23	0.10321	0.011403	0.9886	0.022806	0.36233	FALSE
HGLibA_17026	FBXO11	15.975/94.942/105.42	13.762/7.4062/0	54.325	2.0831	-4.1655	2865.3	3500.4	0.88299	0.011409	0.98859	0.022817	0.36247	FALSE
HGLibA_15371	EPS15L1	0/0/47.02	0/0/0	0.67816	0	-0.74688	1074.2	43.698	0.10259	0.011478	0.98852	0.022956	0.36424	FALSE
HGLibA_57719	hsa-mir-1302-8	130.08/149.46/19.718	20.643/0/12.898	72.703	2.8986	-4.2407	5996.1	4684.6	1.0199	0.011481	0.98852	0.022962	0.36429	FALSE
HGLibA_14268	DYNLT3	131.23/171.08/234.34	131.88/85.912/0	173.93	10.332	-3.9483	2740.7	11207	1.5453	0.011512	0.98849	0.023024	0.36512	FALSE
HGLibB_12397	DCAF10	0/0/46.261	0/0/0	0.67396	0	-0.74327	1039.6	43.427	0.10227	0.011517	0.98848	0.023034	0.3652	FALSE
HGLibB_28608	MCRS1	45.644/0/0	0/0/0	0.67051	0	-0.74029	1011.7	43.205	0.10201	0.011549	0.98845	0.023098	0.36576	FALSE
HGLibA_13718	DNTTIP1	45.644/0/0	0/0/0	0.67051	0	-0.74029	1011.7	43.205	0.10201	0.011549	0.98845	0.023098	0.36576	FALSE
HGLibA_06456	C6orf163	0/43.241/49.295	0/0/9.9214	5.8822	0.36449	-2.3345	1657.5	379.02	0.28342	0.011565	0.98844	0.02313	0.36607	FALSE
HGLibB_17435	FGGY	22.822/18.8/0	4.5872/0/0	3.4121	0.26056	-1.8074	312.59	219.86	0.21255	0.011575	0.98843	0.023149	0.36629	FALSE
HGLibB_15739	EXOC7	579.67/282.95/453.51	136.47/37.031/70.442	420.56	70.887	-2.5519	22670	27099	2.1242	0.011577	0.98842	0.023154	0.36629	FALSE
HGLibB_42715	SASS6	78.735/0/37.919	0/11.85/0	6.5923	0.39255	-2.4468	3114.7	424.78	0.30081	0.011577	0.98842	0.023155	0.36629	FALSE
HGLibA_54637	YARS2	0/17.86/56.879	6.8809/0/0	4.5775	0.31175	-2.0881	1466.4	294.95	0.24838	0.011578	0.98842	0.023156	0.36629	FALSE
HGLibB_35734	PDE3A	73.03/43.241/94.04	3.4404/0/58.536	66.722	2.6484	-4.2143	668.7	4299.3	0.9772	0.011588	0.98841	0.023177	0.36652	FALSE
HGLibA_64039	hsa-mir-7977	1.1411/56.401/20.476	0/0/28.772	11.2	0.56094	-2.9664	1115.2	721.67	0.39603	0.011592	0.98841	0.023184	0.36654	FALSE
HGLibB_32217	NOL11	0/4.7001/105.42	0/0/4.9607	3.5999	0.26989	-1.8569	5190.3	231.96	0.21864	0.011609	0.98839	0.023217	0.36687	FALSE
HGLibA_25024	KLB	0/44.181/0	0/0/0	0.66221	0	-0.7331	947.37	42.67	0.10138	0.011627	0.98837	0.023255	0.36727	FALSE
HGLibA_55384	ZMIZ2	0/44.181/0	0/0/0	0.66221	0	-0.7331	947.37	42.67	0.10138	0.011627	0.98837	0.023255	0.36727	FALSE
HGLibA_41108	RGS8	42.22/53.581/0	1.1468/0.74062/0	6.0018	0.37148	-2.352	1805.8	386.73	0.2863	0.011637	0.98836	0.023274	0.36752	FALSE
HGLibA_60467	hsa-mir-4509-2	26.245/51.701/0	8.0277/0/0	5.0485	0.33317	-2.1817	1325.6	325.3	0.26144	0.011642	0.98836	0.023284	0.36763	FALSE
HGLibB_12543	DCTN5	86.723/113.74/119.82	22.936/0/49.607	105.73	4.756	-4.2128	312.06	6812.9	1.2234	0.011664	0.98834	0.023329	0.36814	FALSE
HGLibA_47881	SV2C	181.43/52.641/134.23	21.789/58.509/0	108.65	4.9435	-4.2055	4544.5	7000.9	1.2394	0.01167	0.98833	0.02334	0.36827	FALSE
HGLibB_50265	TMEM253	71.889/31.021/194.15	16.055/19.997/0	75.68	3.0902	-4.2286	8021.5	4876.5	1.0395	0.011674	0.98833	0.023348	0.36836	FALSE
HGLibB_29942	MRPL42	84.441/111.86/0	22.936/0/0	9.7185	0.51301	-2.8246	8055.6	626.22	0.36786	0.011694	0.98831	0.023388	0.36874	FALSE
HGLibA_18431	GAGE1	778.22/710.65/579.41	207.57/282.18/162.71	684.3	212.02	-1.6858	10259	44093	2.2491	0.011699	0.9883	0.023398	0.36885	FALSE
HGLibB_42031	RPS16	35.374/66.741/56.879	0/22.959/3.9686	51.212	2.0091	-4.117	262.06	3299.9	0.85653	0.011704	0.9883	0.023407	0.36895	FALSE
HGLibA_02409	APEX2	0/0/42.47	0/0/0	0.65226	0	-0.72444	874.77	42.029	0.10061	0.011723	0.98828	0.023446	0.36931	FALSE
HGLibA_23127	IL3	42.22/0/0	0/0/0	0.65079	0	-0.72315	864.43	41.934	0.1005	0.011737	0.98826	0.023475	0.36953	FALSE
HGLibA_59765	hsa-mir-4264	42.22/0/0	0/0/0	0.65079	0	-0.72315	864.43	41.934	0.1005	0.011737	0.98826	0.023475	0.36953	FALSE
HGLibA_47687	STYX	17.116/0/55.362	6.8809/0/0	4.4707	0.31175	-2.0602	1384.9	288.07	0.24504	0.011748	0.98825	0.023497	0.36977	FALSE
HGLibA_50914	TNRC6A	78.735/36.661/61.429	0/10.369/11.906	56.185	2.225	-4.1483	458.6	3620.3	0.89681	0.011765	0.98823	0.02353	0.37006	FALSE
HGLibB_22082	HRSP12	52.49/66.741/47.778	4.5872/25.181/0	55.111	2.1798	-4.1413	97.951	3551.1	0.88824	0.011765	0.98824	0.023529	0.37006	FALSE
HGLibA_62448	hsa-mir-587	59.337/68.621/40.953	4.5872/25.181/0	55.044	2.1798	-4.1395	200.67	3546.8	0.88765	0.01178	0.98822	0.02356	0.37033	FALSE
HGLibB_48312	TAS2R14	94.71/58.281/163.81	14.909/54.806/0	96.708	4.2516	-4.2176	2991.7	6231.4	1.1712	0.011782	0.98822	0.023563	0.37033	FALSE
HGLibB_50643	TNFAIP1	74.171/31.961/120.58	10.321/19.997/0	65.89	2.6564	-4.1933	2105.5	4245.7	0.97045	0.011795	0.98821	0.023589	0.37064	FALSE
HGLibB_24560	KIAA0141	41.079/0/0	0/0/0	0.64398	0	-0.71719	817.92	41.495	0.099971	0.011805	0.9882	0.023609	0.37081	FALSE
HGLibB_19333	GLTSCR2	41.079/0/0	0/0/0	0.64398	0	-0.71719	817.92	41.495	0.099971	0.011805	0.9882	0.023609	0.37081	FALSE
HGLibB_09481	CHMP4B	0/0/40.953	0/0/0	0.64321	0	-0.71652	812.84	41.446	0.099911	0.011812	0.98819	0.023624	0.371	FALSE
HGLibB_37550	POLR2K	166.6/55.461/50.812	0/2.9625/121.04	77.735	3.2352	-4.2165	4558.9	5008.9	1.0526	0.011838	0.98816	0.023675	0.37146	FALSE
HGLibB_10440	COA5	38.797/62.981/179.74	14.909/0/22.819	76.032	3.1522	-4.2135	6155.8	4899.1	1.0412	0.011847	0.98815	0.023693	0.37169	FALSE
HGLibA_42767	SASS6	126.66/81.782/38.678	0/11.85/25.796	73.733	3.0395	-4.2095	2047.5	4751	1.0256	0.011849	0.98815	0.023698	0.37172	FALSE
HGLibA_50384	TMEM39A	90.146/14.1/84.939	37.845/0/1.9843	47.665	1.8924	-4.0726	2160.3	3071.4	0.82593	0.011859	0.98814	0.023719	0.37192	FALSE
HGLibA_38046	PPP1R15A	5.7054/29.141/26.543	63.075/0/0	16.438	0.75805	-3.3101	189.34	1059.2	0.48178	0.011868	0.98813	0.023735	0.37206	FALSE
HGLibB_35640	PCSK9	42.22/95.882/0	0/14.812/0	7.3059	0.43029	-2.5378	4559	470.76	0.31689	0.011871	0.98813	0.023741	0.3721	FALSE
HGLibA_55465	ZNF133	34.233/78.962/31.094	6.8809/8.8874/0	43.812	1.7444	-4.0293	744.51	2823	0.79175	0.011882	0.98812	0.023764	0.37236	FALSE
HGLibB_39056	PSMB3	51.349/108.1/72.805	0/12.591/24.804	73.938	3.0616	-4.2056	839.36	4764.3	1.0268	0.011897	0.9881	0.023794	0.37254	FALSE
HGLibB_17782	FOSL2	0/0/39.436	0/0/0	0.63395	0	-0.70836	753.2	40.849	0.099189	0.011905	0.98809	0.023811	0.37272	FALSE
HGLibB_12697	DDX41	0/58.281/105.42	0/0/18.851	8.4087	0.47439	-2.6739	5984.1	541.82	0.34086	0.011925	0.98807	0.02385	0.37318	FALSE
HGLibA_52609	UBE2G2	209.96/376.95/362.51	20.643/42.215/45.639	306.14	34.141	-3.1277	8720.8	19726	1.9366	0.011931	0.98807	0.023862	0.37324	FALSE
HGLibA_22172	HSD17B10	63.901/119.38/87.214	9.1745/62.212/0	87.303	3.7662	-4.2115	788.37	5625.4	1.1138	0.011932	0.98807	0.023864	0.37324	FALSE
HGLibA_11598	CTCFL	71.889/76.141/57.637	22.936/10.369/0	68.077	2.7891	-4.1883	94.277	4386.6	0.98575	0.011935	0.98807	0.023869	0.37325	FALSE
HGLibA_62705	hsa-mir-6165	38.797/0/0	0/0/0	0.62997	0	-0.70485	728.76	40.593	0.098877	0.011946	0.98805	0.023892	0.37353	FALSE
HGLibA_41865	RPL12	0/38.541/0	0/0/0	0.62836	0	-0.70342	719.07	40.489	0.098751	0.011962	0.98804	0.023925	0.37381	FALSE
HGLibB_54109	WDR75	0/38.541/0	0/0/0	0.62836	0	-0.70342	719.07	40.489	0.098751	0.011962	0.98804	0.023925	0.37381	FALSE
HGLibB_32163	NMT1	147.2/233.12/187.32	111.24/162.94/0	185.94	12.099	-3.8351	1864.6	11981	1.5882	0.011971	0.98803	0.023942	0.37403	FALSE
HGLibA_03554	ATP11A	71.889/95.882/170.64	42.432/0/28.772	105.56	4.8705	-4.1821	2731.1	6802.1	1.2209	0.011983	0.98802	0.023966	0.3743	FALSE
HGLibA_51324	TRAPPC4	0/33.841/10.617	4.5872/0/0	3.2134	0.26056	-1.7409	501.59	207.06	0.20521	0.011999	0.988	0.023998	0.37461	FALSE
HGLibB_15231	EPB41L4B	58.195/163.56/100.11	0/27.403/33.733	98.413	4.4315	-4.194	2932.4	6341.3	1.1802	0.012002	0.988	0.024005	0.37466	FALSE
HGLibA_20650	GUCD1	37.656/0/0	0/0/0	0.62276	0	-0.69845	686.11	40.128	0.09831	0.012021	0.98798	0.024041	0.37498	FALSE
HGLibA_63060	hsa-mir-6727	37.656/0/0	0/0/0	0.62276	0	-0.69845	686.11	40.128	0.09831	0.012021	0.98798	0.024041	0.37498	FALSE
HGLibA_49639	TLR1	37.656/0/0	0/0/0	0.62276	0	-0.69845	686.11	40.128	0.09831	0.012021	0.98798	0.024041	0.37498	FALSE
HGLibA_20590	GTF3C4	37.656/0/0	0/0/0	0.62276	0	-0.69845	686.11	40.128	0.09831	0.012021	0.98798	0.024041	0.37498	FALSE
HGLibA_10491	COG8	49.067/27.261/60.671	10.321/5.9249/0	43.301	1.7448	-4.0125	296.13	2790.1	0.78672	0.012023	0.98798	0.024047	0.37502	FALSE
HGLibA_32865	NTNG1	0/0/37.161	0/0/0	0.61959	0	-0.69563	668.01	39.924	0.098059	0.012054	0.98795	0.024108	0.37563	FALSE
HGLibA_48503	TBC1D22A	191.7/41.361/117.55	24.083/37.772/0	97.705	4.4076	-4.1901	6202	6295.7	1.1758	0.012056	0.98794	0.024112	0.37564	FALSE
HGLibA_01084	AEBP1	103.84/252.86/104.66	100.92/42.956/0	140.08	7.4767	-4.0568	7644.5	9025.9	1.3957	0.012062	0.98794	0.024123	0.37572	FALSE
HGLibB_49121	TFIP11	0/36.661/0	0/0/0	0.61635	0	-0.69274	649.98	39.715	0.097803	0.012088	0.98791	0.024176	0.37625	FALSE
HGLibA_61985	hsa-mir-548f-4	0/36.661/0	0/0/0	0.61635	0	-0.69274	649.98	39.715	0.097803	0.012088	0.98791	0.024176	0.37625	FALSE
HGLibA_08868	CDR2L	36.515/0/0	0/0/0	0.61541	0	-0.6919	644.76	39.654	0.097728	0.012098	0.9879	0.024196	0.37637	FALSE
HGLibA_41952	RPL36	36.515/0/0	0/0/0	0.61541	0	-0.6919	644.76	39.654	0.097728	0.012098	0.9879	0.024196	0.37637	FALSE
HGLibA_30566	MUM1	36.515/0/0	0/0/0	0.61541	0	-0.6919	644.76	39.654	0.097728	0.012098	0.9879	0.024196	0.37637	FALSE
HGLibB_39120	PSMD3	43.361/30.081/53.087	3.4404/15.553/0	41.067	1.6696	-3.978	135.22	2646.2	0.76587	0.012107	0.98789	0.024215	0.37652	FALSE
HGLibB_23397	INTS7	77.594/40.421/188.84	27.523/0/18.851	84	3.6408	-4.195	6465.6	5412.6	1.0923	0.012116	0.98788	0.024232	0.37662	FALSE
HGLibB_04432	BET1L	149.48/48.881/201.73	63.075/27.403/0	113.83	5.4801	-4.1473	6608.1	7334.6	1.2651	0.012122	0.98788	0.024244	0.37672	FALSE
HGLibB_30226	MSTO1	54.772/48.881/156.23	33.257/10.369/0	74.798	3.1686	-4.1845	3851.7	4819.7	1.0318	0.012151	0.98785	0.024301	0.37715	FALSE
HGLibB_03751	ATP6V1F	0/35.721/0	0/0/0	0.6102	0	-0.68724	616.75	39.318	0.097313	0.012154	0.98785	0.024308	0.37715	FALSE
HGLibA_34329	OR5M1	0/35.721/0	0/0/0	0.6102	0	-0.68724	616.75	39.318	0.097313	0.012154	0.98785	0.024308	0.37715	FALSE
HGLibB_07216	CARD14	0/87.422/27.302	0/11.85/0	6.113	0.39255	-2.3527	3548.7	393.89	0.28823	0.012155	0.98785	0.02431	0.37715	FALSE
HGLibB_39260	PTGDS	128.94/67.681/191.11	56.194/37.031/0	118.6	5.8347	-4.1292	3978.9	7642.1	1.2899	0.012158	0.98784	0.024316	0.3772	FALSE
HGLibA_40021	RABGGTB	12.552/0/26.543	4.5872/0/0	3.1303	0.26056	-1.7122	323.37	201.71	0.20207	0.012189	0.98781	0.024377	0.3779	FALSE
HGLibA_54322	WISP2	168.88/94.942/58.396	59.634/0/15.874	97.84	4.4696	-4.1756	3305.6	6304.4	1.1759	0.012208	0.98779	0.024416	0.37846	FALSE
HGLibB_55031	ZDHHC20	0/0/34.886	0/0/0	0.60463	0	-0.68224	587.96	38.96	0.096869	0.012214	0.98779	0.024428	0.37855	FALSE
HGLibA_31149	NARG2	0/0/34.886	0/0/0	0.60463	0	-0.68224	587.96	38.96	0.096869	0.012214	0.98779	0.024428	0.37855	FALSE
HGLibA_02500	APOBR	221.37/116.56/84.181	0/37.031/84.332	129.52	6.6933	-4.0845	5330.2	8345.4	1.3445	0.012219	0.98778	0.024438	0.37861	FALSE
HGLibB_23183	ILF2	35.374/85.542/60.671	0/35.55/3.9686	56.841	2.3387	-4.1147	649.61	3662.6	0.90058	0.012222	0.98778	0.024445	0.37861	FALSE
HGLibA_22469	IAPP	135.79/62.981/78.872	26.377/23.7/0	87.705	3.8793	-4.1843	1500.7	5651.3	1.1151	0.012227	0.98777	0.024454	0.3787	FALSE
HGLibB_07264	CASC10	0/52.641/31.094	0/0/9.9214	5.3795	0.36449	-2.2251	1461.9	346.63	0.26936	0.01224	0.98776	0.02448	0.37901	FALSE
HGLibA_45875	SNAP23	108.4/69.561/36.402	0/17.034/12.898	65.001	2.7135	-4.1516	1361.2	4188.4	0.96245	0.012243	0.98776	0.024486	0.37905	FALSE
HGLibA_48000	SYNGR4	0/7.5201/40.194	0/4.4437/0	3.0314	0.25684	-1.6815	705.21	195.33	0.19852	0.012247	0.98775	0.024493	0.37911	FALSE
HGLibA_39968	RAB5C	36.515/44.181/79.63	33.257/2.9625/0	50.463	2.0698	-4.0673	542.38	3251.6	0.84866	0.01225	0.98775	0.024499	0.37911	FALSE
HGLibB_32876	NUDC	75.312/66.741/100.87	34.404/0/12.898	79.74	3.4529	-4.1805	317.42	5138.1	1.0643	0.012259	0.98774	0.024518	0.37911	FALSE
HGLibA_06117	C2orf27A	4.5644/36.661/0	3.4404/0/0	2.4786	0.22836	-1.5018	589.45	159.71	0.17806	0.012261	0.98774	0.024522	0.37911	FALSE
HGLibA_31433	NDST4	34.233/0/0	0/0/0	0.60022	0	-0.67827	565.93	38.676	0.096515	0.012262	0.98774	0.024525	0.37911	FALSE
HGLibA_63594	hsa-mir-6855	34.233/0/0	0/0/0	0.60022	0	-0.67827	565.93	38.676	0.096515	0.012262	0.98774	0.024525	0.37911	FALSE
HGLibB_40760	RELA	0/33.841/0	0/0/0	0.59755	0	-0.67586	552.91	38.503	0.096299	0.012292	0.98771	0.024584	0.37964	FALSE
HGLibB_48723	TCF25	0/33.841/0	0/0/0	0.59755	0	-0.67586	552.91	38.503	0.096299	0.012292	0.98771	0.024584	0.37964	FALSE
HGLibA_09070	CENPM	31.95/124.08/57.637	0/22.959/7.9371	61.151	2.5464	-4.1314	2412.7	3940.3	0.93362	0.012296	0.9877	0.024593	0.37972	FALSE
HGLibA_26352	LGALS13	61.619/29.141/101.62	0/5.1843/27.78	56.734	2.3515	-4.1066	1400.2	3655.7	0.89944	0.012315	0.98768	0.024631	0.38008	FALSE
HGLibA_14533	EFCAB14	107.26/93.062/110.72	40.138/30.365/0	103.39	4.8676	-4.1531	87.726	6662.1	1.2071	0.012338	0.98766	0.024677	0.38065	FALSE
HGLibB_39970	RABGGTB	33.092/0/0	0/0/0	0.59238	0	-0.67118	528.45	38.17	0.095882	0.01235	0.98765	0.0247	0.38085	FALSE
HGLibB_57002	ZWINT	0/88.362/62.946	19.496/0/0	8.1313	0.48084	-2.6244	4753.8	523.95	0.33423	0.012362	0.98764	0.024724	0.3811	FALSE
HGLibB_28798	MEF2C	0/32.901/0	0/0/0	0.59105	0	-0.66998	522.3	38.084	0.095774	0.012365	0.98764	0.02473	0.38115	FALSE
HGLibB_26216	LDLRAP1	0/16.92/29.577	5.7341/0/0	3.5965	0.28784	-1.8356	432.72	231.75	0.21735	0.012389	0.98761	0.024779	0.3816	FALSE
HGLibB_24770	KIAA1704	93.569/50.761/79.63	18.349/17.775/0	72.322	3.1068	-4.1582	484.87	4660.1	1.0139	0.012404	0.9876	0.024807	0.38194	FALSE
HGLibA_13190	DHX36	139.21/63.921/132.72	21.789/62.212/0	105.71	5.0476	-4.1412	1799.1	6811.4	1.2197	0.012411	0.98759	0.024821	0.38211	FALSE
HGLibB_28833	MEIS2	209.96/202.1/81.905	66.515/103.69/0	151.49	8.7424	-3.9683	5411.4	9761.1	1.4448	0.012433	0.98757	0.024866	0.38246	FALSE
HGLibB_28947	METTL22	46.785/69.561/25.785	1.1468/57.028/0	43.789	1.824	-3.9873	498.66	2821.6	0.79003	0.012438	0.98756	0.024877	0.38246	FALSE
HGLibB_38468	PRKAG3	0/31.961/0	0/0/0	0.58442	0	-0.66396	492.57	37.658	0.095236	0.01244	0.98756	0.024881	0.38246	FALSE
HGLibB_44386	SLC16A3	0/31.961/0	0/0/0	0.58442	0	-0.66396	492.57	37.658	0.095236	0.01244	0.98756	0.024881	0.38246	FALSE
HGLibB_18394	GADD45B	31.95/0/0	0/0/0	0.58435	0	-0.66389	492.26	37.653	0.09523	0.012441	0.98756	0.024882	0.38246	FALSE
HGLibA_09015	CELF5	31.95/0/0	0/0/0	0.58435	0	-0.66389	492.26	37.653	0.09523	0.012441	0.98756	0.024882	0.38246	FALSE
HGLibB_46253	SP6	31.95/0/0	0/0/0	0.58435	0	-0.66389	492.26	37.653	0.09523	0.012441	0.98756	0.024882	0.38246	FALSE
HGLibA_35797	PDE4D	61.619/54.521/233.58	22.936/0/34.725	92.257	4.2129	-4.1611	11168	5944.6	1.1419	0.012445	0.98755	0.02489	0.38253	FALSE
HGLibB_26003	LARP6	0/59.221/31.852	0/11.109/0	5.6443	0.38216	-2.2652	1794.6	363.69	0.27593	0.01245	0.98755	0.024901	0.38265	FALSE
HGLibA_44422	SLC16A11	160.89/66.741/166.84	60.781/40.734/0	121.46	6.1878	-4.0907	3304.3	7826.7	1.303	0.01246	0.98754	0.024919	0.38288	FALSE
HGLibA_61553	hsa-mir-511	108.4/103.4/213.11	52.753/72.581/0	133.68	7.1694	-4.0432	3932	8613.9	1.3631	0.012475	0.98753	0.024949	0.38329	FALSE
HGLibA_48201	TAF11	94.71/49.821/128.17	12.615/45.918/0	84.574	3.7822	-4.1614	1605.4	5449.6	1.0944	0.01249	0.98751	0.024979	0.38346	FALSE
HGLibA_52566	UBC	63.901/6.5801/68.255	2.2936/0/11.906	30.702	1.3217	-3.7713	1547.1	1978.3	0.66056	0.0125	0.9875	0.024999	0.38365	FALSE
HGLibB_25515	KRT8	37.656/106.22/163.81	41.285/15.553/0	86.877	3.9162	-4.1599	4357.9	5598	1.1088	0.012501	0.9875	0.025002	0.38365	FALSE
HGLibB_01363	AIPL1	83.299/126.9/131.2	24.083/71.84/0	111.52	5.4825	-4.1175	710.16	7185.9	1.2509	0.012504	0.9875	0.025009	0.38371	FALSE
HGLibB_21293	HINFP	79.876/0/100.87	0/0/24.804	9.212	0.52915	-2.7395	6739.3	593.58	0.35639	0.012512	0.98749	0.025024	0.38383	FALSE
HGLibB_18644	GATA2	0/0/31.094	0/0/0	0.5782	0	-0.65828	465.93	37.256	0.094727	0.012512	0.98749	0.025025	0.38383	FALSE
HGLibA_56096	ZNF492	0/31.021/0	0/0/0	0.57767	0	-0.65779	463.72	37.222	0.094684	0.012519	0.98748	0.025037	0.38391	FALSE
HGLibA_59805	hsa-mir-4275	30.809/0/0	0/0/0	0.57613	0	-0.65639	457.36	37.123	0.094558	0.012537	0.98746	0.025073	0.38436	FALSE
HGLibA_43961	SH3KBP1	5.7054/47.001/0	0/4.4437/0	2.9127	0.25684	-1.6384	980.03	187.68	0.19386	0.012541	0.98746	0.025082	0.38444	FALSE
HGLibA_47579	STRAP	130.08/144.76/155.47	122.71/43.696/0	143.06	8.0325	-3.9954	162.63	9218	1.4064	0.012555	0.98745	0.025109	0.38476	FALSE
HGLibB_29680	MPG	0/30.081/0	0/0/0	0.57077	0	-0.65148	435.74	36.778	0.094117	0.0126	0.9874	0.0252	0.38562	FALSE
HGLibB_35924	PDZD11	0/30.081/0	0/0/0	0.57077	0	-0.65148	435.74	36.778	0.094117	0.0126	0.9874	0.0252	0.38562	FALSE
HGLibB_31463	NDUFB10	0/30.081/0	0/0/0	0.57077	0	-0.65148	435.74	36.778	0.094117	0.0126	0.9874	0.0252	0.38562	FALSE
HGLibB_19995	GPR33	0/30.081/0	0/0/0	0.57077	0	-0.65148	435.74	36.778	0.094117	0.0126	0.9874	0.0252	0.38562	FALSE
HGLibB_45575	SMARCD1	0/45.121/68.255	0/14.812/0	6.6614	0.43029	-2.4213	2658.6	429.23	0.30076	0.012608	0.98739	0.025217	0.38574	FALSE
HGLibA_34278	OR5D14	39.938/81.782/122.86	20.643/17.775/0	73.771	3.2345	-4.1422	1809.2	4753.5	1.0231	0.01262	0.98738	0.02524	0.3859	FALSE
HGLibB_42572	SACM1L	36.515/35.721/5.3087	9.1745/0/0.99214	19.114	0.90428	-3.4009	384.57	1231.7	0.51888	0.012622	0.98738	0.025245	0.3859	FALSE
HGLibA_12696	DDX39A	29.668/0/0	0/0/0	0.56771	0	-0.64865	423.74	36.58	0.093864	0.012637	0.98736	0.025273	0.38618	FALSE
HGLibA_30063	MRPS21	29.668/0/0	0/0/0	0.56771	0	-0.64865	423.74	36.58	0.093864	0.012637	0.98736	0.025273	0.38618	FALSE
HGLibB_10605	COL8A2	0/0/29.577	0/0/0	0.56702	0	-0.64803	421.11	36.536	0.093807	0.012645	0.98736	0.02529	0.38628	FALSE
HGLibB_31446	NDUFAF3	0/0/29.577	0/0/0	0.56702	0	-0.64803	421.11	36.536	0.093807	0.012645	0.98736	0.02529	0.38628	FALSE
HGLibB_54638	YPEL1	0/0/29.577	0/0/0	0.56702	0	-0.64803	421.11	36.536	0.093807	0.012645	0.98736	0.02529	0.38628	FALSE
HGLibB_34532	OR9I1	73.03/52.641/60.671	4.5872/43.696/0	61.556	2.6381	-4.1039	105.95	3966.4	0.93552	0.012654	0.98735	0.025309	0.38639	FALSE
HGLibB_54694	YY1AP1	109.54/73.321/89.489	24.083/31.106/0	89.579	4.1259	-4.1433	331.47	5772	1.1248	0.012669	0.98733	0.025339	0.38674	FALSE
HGLibA_50999	TOP3A	0/29.141/0	0/0/0	0.56374	0	-0.645	408.64	36.325	0.093535	0.012685	0.98732	0.025369	0.38708	FALSE
HGLibB_25308	KNG1	0/0/28.819	0/0/0	0.56129	0	-0.64274	399.55	36.167	0.093332	0.012714	0.98729	0.025429	0.38786	FALSE
HGLibA_12610	DDI1	52.49/0.94002/0	2.2936/0/0	1.6619	0.18819	-1.1637	1293.4	107.09	0.14241	0.012722	0.98728	0.025443	0.38798	FALSE
HGLibB_50214	TMEM236	66.183/17.86/1.5168	0/43.696/0	12.339	0.65942	-3.0069	1523.4	795.08	0.41422	0.012733	0.98727	0.025466	0.38824	FALSE
HGLibB_05897	C1orf86	28.527/0/0	0/0/0	0.55906	0	-0.64068	391.42	36.024	0.093147	0.012742	0.98726	0.025483	0.38835	FALSE
HGLibA_27547	LSM6	62.76/0/0	0/0/0.99214	0.75663	0.12187	-0.64691	1922.8	48.754	0.090909	0.012756	0.98724	0.025512	0.38869	FALSE
HGLibA_46440	SPATA19	0/28.201/0	0/0/0	0.55655	0	-0.63835	382.4	35.861	0.092937	0.012773	0.98723	0.025545	0.38914	FALSE
HGLibA_40501	RBM18	0/0/28.06	0/0/0	0.55546	0	-0.63734	378.56	35.791	0.092846	0.012786	0.98721	0.025572	0.3895	FALSE
HGLibA_54657	YEATS4	84.441/159.8/174.43	104.36/38.512/0	133.03	7.2885	-4.0153	2395.9	8571.6	1.3581	0.012797	0.9872	0.025593	0.38969	FALSE
HGLibA_42213	RPUSD3	30.809/60.161/0	0/11.85/0	5.611	0.39255	-2.2471	1821.1	361.55	0.27445	0.012838	0.98716	0.025676	0.39074	FALSE
HGLibA_60352	hsa-mir-4483	41.079/50.761/0	12.615/0/0	5.8386	0.40285	-2.2854	1647	376.22	0.28025	0.012847	0.98715	0.025693	0.39083	FALSE
HGLibB_39174	PSPC1	36.515/16.92/0	6.8809/0/0	3.8647	0.31175	-1.8908	625.71	249.02	0.22515	0.012847	0.98715	0.025695	0.39083	FALSE
HGLibA_39419	PTPLAD1	69.606/15.98/0	9.1745/0/0	4.7216	0.35265	-2.0806	2179.5	304.24	0.25048	0.012851	0.98715	0.025702	0.39088	FALSE
HGLibA_38897	PRRX2	0/0/27.302	0/0/0	0.54952	0	-0.63182	358.14	35.409	0.092348	0.01286	0.98714	0.02572	0.39094	FALSE
HGLibA_22918	IKBKAP	0/0/27.302	0/0/0	0.54952	0	-0.63182	358.14	35.409	0.092348	0.01286	0.98714	0.02572	0.39094	FALSE
HGLibA_50269	TMEM235	58.195/42.301/95.556	16.055/13.331/0	61.736	2.6892	-4.0879	767.04	3978	0.93619	0.012862	0.98714	0.025724	0.39094	FALSE
HGLibB_19444	GNAS	0/27.261/0	0/0/0	0.54919	0	-0.63152	357.05	35.388	0.092321	0.012864	0.98714	0.025729	0.39094	FALSE
HGLibB_45894	SNRNP35	0/27.261/0	0/0/0	0.54919	0	-0.63152	357.05	35.388	0.092321	0.012864	0.98714	0.025729	0.39094	FALSE
HGLibA_27667	LY6G6D	0/27.261/0	0/0/0	0.54919	0	-0.63152	357.05	35.388	0.092321	0.012864	0.98714	0.025729	0.39094	FALSE
HGLibB_29937	MRPL40	0/27.261/0	0/0/0	0.54919	0	-0.63152	357.05	35.388	0.092321	0.012864	0.98714	0.025729	0.39094	FALSE
HGLibB_31759	NFIB	201.97/83.662/291.22	121.56/112.57/0	170.11	11.009	-3.8327	11578	10961	1.5196	0.012868	0.98713	0.025735	0.39098	FALSE
HGLibB_10056	CLLU1OS	21.681/77.081/91.006	1.1468/111.83/0	53.403	2.3076	-4.0398	1490.5	3441	0.87103	0.012892	0.98711	0.025785	0.39148	FALSE
HGLibA_24091	KAZN	15.975/0/100.11	0/11.109/0	5.3411	0.38216	-2.1978	4561.1	344.16	0.26731	0.012894	0.98711	0.025787	0.39148	FALSE
HGLibA_36271	PGM3	14.834/29.141/46.261	0/0.74062/27.78	27.155	1.2283	-3.6594	260.4	1749.7	0.61981	0.012911	0.98709	0.025822	0.39186	FALSE
HGLibA_46342	SPAG1	60.478/43.241/97.832	16.055/14.812/0	63.488	2.7882	-4.0895	799.24	4090.9	0.94903	0.01293	0.98707	0.02586	0.39211	FALSE
HGLibA_14868	EIF6	36.515/22.56/0	8.0277/0/0	4.2616	0.33317	-1.9806	696.64	274.6	0.23707	0.012934	0.98707	0.025868	0.39211	FALSE
HGLibB_54611	YIPF4	0/0/26.543	0/0/0	0.54347	0	-0.62618	338.29	35.019	0.091839	0.012937	0.98706	0.025874	0.39211	FALSE
HGLibA_37372	PNMA3	0/0/26.543	0/0/0	0.54347	0	-0.62618	338.29	35.019	0.091839	0.012937	0.98706	0.025874	0.39211	FALSE
HGLibB_37742	POU5F2	0/0/26.543	0/0/0	0.54347	0	-0.62618	338.29	35.019	0.091839	0.012937	0.98706	0.025874	0.39211	FALSE
HGLibB_24433	KCTD8	94.71/49.821/197.94	0/70.359/15.874	97.765	4.7282	-4.1079	6171.3	6299.6	1.1722	0.012953	0.98705	0.025907	0.39236	FALSE
HGLibB_52717	UBXN2A	0/26.321/0	0/0/0	0.54167	0	-0.6245	332.57	34.903	0.091687	0.01296	0.98704	0.02592	0.39241	FALSE
HGLibA_26731	LMX1A	0/26.321/0	0/0/0	0.54167	0	-0.6245	332.57	34.903	0.091687	0.01296	0.98704	0.02592	0.39241	FALSE
HGLibB_17308	FFAR3	7.9876/76.141/120.58	3.4404/19.997/0	41.962	1.8234	-3.9276	4251.9	2703.8	0.77191	0.012964	0.98704	0.025928	0.39245	FALSE
HGLibB_03292	ASH1L	26.245/0/0	0/0/0	0.54106	0	-0.62392	330.64	34.864	0.091635	0.012968	0.98703	0.025936	0.39245	FALSE
HGLibB_43533	SERPINF1	26.245/0/0	0/0/0	0.54106	0	-0.62392	330.64	34.864	0.091635	0.012968	0.98703	0.025936	0.39245	FALSE
HGLibA_13741	DOCK2	0/18.8/53.087	0/8.8874/0	4.5497	0.34793	-2.0417	1289.8	293.16	0.2454	0.012974	0.98703	0.025948	0.39257	FALSE
HGLibA_29998	MRPL47	35.374/51.701/112.24	42.432/4.4437/0	59.001	2.5835	-4.0655	1723	3801.8	0.915	0.012986	0.98701	0.025972	0.39282	FALSE
HGLibA_33081	NUPL1	49.067/70.501/0	0/17.034/0	6.9279	0.45542	-2.4455	2932.6	446.41	0.30634	0.013011	0.98699	0.026022	0.39322	FALSE
HGLibA_28364	MARK1	96.992/56.401/80.389	24.083/18.515/0	76.048	3.4574	-4.1115	421.76	4900.2	1.037	0.01302	0.98698	0.02604	0.39342	FALSE
HGLibB_29389	MLNR	54.772/32.901/48.537	4.5872/0/17.859	44.392	1.9342	-3.9514	128.49	2860.4	0.79385	0.013023	0.98698	0.026047	0.39347	FALSE
HGLibA_27097	LPIN2	26.245/18.8/2.2752	34.404/0/0	10.475	0.60139	-2.8411	192.62	674.97	0.38005	0.013026	0.98697	0.026052	0.39347	FALSE
HGLibB_16783	FAM96B	0/15.04/128.17	0/12.591/0	5.6909	0.40253	-2.2542	7560.1	366.7	0.27617	0.013047	0.98695	0.026095	0.39375	FALSE
HGLibA_57035	ZSCAN9	75.312/106.22/143.33	67.662/22.219/0	104.67	5.2278	-4.0847	1179.6	6744.5	1.2109	0.013056	0.98694	0.026112	0.39396	FALSE
HGLibA_31755	NEXN	0/25.38/0	0/0/0	0.53397	0	-0.61727	308.96	34.407	0.091032	0.01306	0.98694	0.026121	0.39404	FALSE
HGLibA_52491	U2AF1	26.245/0/43.228	0/9.628/0	4.7509	0.35991	-2.0803	982.52	306.13	0.25096	0.013066	0.98693	0.026131	0.39415	FALSE
HGLibA_30963	N6AMT1	39.938/116.56/82.664	13.762/28.144/0	72.748	3.2956	-4.1017	1547.3	4687.5	1.0144	0.013083	0.98692	0.026167	0.39451	FALSE
HGLibA_09067	CENPL	142.64/89.302/219.17	52.753/105.91/0	140.81	8.144	-3.955	4398.5	9073.4	1.3928	0.013088	0.98691	0.026176	0.39451	FALSE
HGLibA_31948	NIP7	133.51/67.681/65.221	41.285/15.553/0	83.846	3.9162	-4.1092	1537.2	5402.6	1.0874	0.01309	0.98691	0.026181	0.39451	FALSE
HGLibB_41902	RPL36A	25.104/0/0	0/0/0	0.53167	0	-0.6151	302.18	34.258	0.090836	0.013091	0.98691	0.026182	0.39451	FALSE
HGLibA_51652	TRIQK	25.104/0/0	0/0/0	0.53167	0	-0.6151	302.18	34.258	0.090836	0.013091	0.98691	0.026182	0.39451	FALSE
HGLibA_41730	RNPS1	39.938/75.201/0	16.055/0/0	6.6054	0.44463	-2.3963	2930.1	425.62	0.29862	0.013102	0.9869	0.026203	0.39478	FALSE
HGLibA_37692	POP5	33.092/9.4002/72.046	2.2936/11.109/0	28.235	1.2896	-3.6746	1148.9	1819.3	0.63173	0.013116	0.98688	0.026231	0.39511	FALSE
HGLibA_26634	LIPT1	29.668/73.321/57.637	16.055/7.4062/0	50.058	2.1974	-3.9972	507.18	3225.5	0.84271	0.013127	0.98687	0.026253	0.39539	FALSE
HGLibB_52623	UBE3D	19.398/43.241/34.127	20.643/1.4812/0	30.597	1.3858	-3.7272	148.87	1971.5	0.65788	0.013151	0.98685	0.026303	0.39589	FALSE
HGLibB_50260	TMEM252	46.785/52.641/60.671	13.762/10.369/0	53.065	2.3391	-4.0171	48.735	3419.3	0.86748	0.01316	0.98684	0.026319	0.39609	FALSE
HGLibB_55874	ZNF415	0/24.44/0	0/0/0	0.52608	0	-0.60983	286.23	33.898	0.090357	0.013165	0.98683	0.026331	0.39617	FALSE
HGLibA_03658	ATP5G2	83.299/26.321/35.644	17.202/4.4437/0	42.765	1.8884	-3.9214	982.09	2755.6	0.7787	0.013187	0.98681	0.026373	0.39675	FALSE
HGLibA_35755	PDCL3	69.606/22.56/72.046	6.8809/0/15.874	48.383	2.1341	-3.9779	838.61	3117.6	0.8283	0.013197	0.9868	0.026393	0.39695	FALSE
HGLibB_19456	GNAZ	36.515/0/68.255	0/14.812/0	6.2019	0.43029	-2.3321	2403.9	399.63	0.28872	0.013204	0.9868	0.026408	0.39712	FALSE
HGLibB_45811	SNAI1	117.53/141/124.37	0/69.618/51.591	127.26	7.0163	-4	145.9	8200.4	1.3279	0.013208	0.98679	0.026415	0.39714	FALSE
HGLibA_06661	C9orf114	74.171/91.182/216.14	66.515/0/32.741	113.5	5.9255	-4.0473	6289.9	7313.4	1.2579	0.013209	0.98679	0.026418	0.39714	FALSE
HGLibB_06418	C5orf64	23.963/0/0	0/0/0	0.52199	0	-0.60596	275.01	33.635	0.090005	0.013221	0.98678	0.026441	0.39715	FALSE
HGLibB_31396	NDUFA1	23.963/0/0	0/0/0	0.52199	0	-0.60596	275.01	33.635	0.090005	0.013221	0.98678	0.026441	0.39715	FALSE
HGLibA_45215	SLC4A2	23.963/0/0	0/0/0	0.52199	0	-0.60596	275.01	33.635	0.090005	0.013221	0.98678	0.026441	0.39715	FALSE
HGLibB_17919	FOXQ1	23.963/0/0	0/0/0	0.52199	0	-0.60596	275.01	33.635	0.090005	0.013221	0.98678	0.026441	0.39715	FALSE
HGLibA_01038	ADRA1A	28.527/37.601/0	0/9.628/0	4.6611	0.35991	-2.0576	838.17	300.34	0.24819	0.013222	0.98678	0.026443	0.39715	FALSE
HGLibB_20082	GPR89B	90.146/109.04/191.11	0/29.625/106.16	123.39	6.7102	-4.012	2948.6	7951	1.3086	0.013235	0.98677	0.02647	0.3975	FALSE
HGLibA_44724	SLC25A37	231.64/145.7/133.48	131.88/96.28/0	165.16	10.735	-3.8237	2901.1	10642	1.4969	0.013241	0.98676	0.026481	0.39762	FALSE
HGLibA_05373	C14orf80	116.39/94.002/122.1	0/149.6/12.898	110.14	5.6948	-4.0531	221.29	7096.6	1.2398	0.013253	0.98675	0.026506	0.39784	FALSE
HGLibA_58305	hsa-mir-224	0/0/23.51	0/0/0	0.51806	0	-0.60223	264.58	33.382	0.089666	0.013274	0.98673	0.026549	0.39815	FALSE
HGLibB_20631	GUCY1B3	0/23.5/0	0/0/0	0.51798	0	-0.60215	264.37	33.376	0.089659	0.013276	0.98672	0.026551	0.39815	FALSE
HGLibB_07814	CCDC62	0/23.5/0	0/0/0	0.51798	0	-0.60215	264.37	33.376	0.089659	0.013276	0.98672	0.026551	0.39815	FALSE
HGLibB_44150	SIRPB1	0/23.5/0	0/0/0	0.51798	0	-0.60215	264.37	33.376	0.089659	0.013276	0.98672	0.026551	0.39815	FALSE
HGLibA_40172	RALGPS2	39.938/50.761/50.053	9.1745/0/10.914	46.643	2.0697	-3.9561	36.772	3005.5	0.81305	0.013277	0.98672	0.026553	0.39815	FALSE
HGLibA_48004	SYNJ1	63.901/78.962/101.62	0/51.843/10.914	80.042	3.7532	-4.0917	363.73	5157.5	1.0623	0.013292	0.98671	0.026585	0.39853	FALSE
HGLibB_18806	GCSAML	17.116/36.661/85.697	6.8809/8.1468/0	37.767	1.6922	-3.848	1362.5	2433.6	0.73129	0.013292	0.98671	0.026585	0.39853	FALSE
HGLibA_12046	CYLC2	44.502/0/59.154	0/15.553/0	6.3174	0.43893	-2.3463	2144.9	407.07	0.29136	0.013311	0.98669	0.026622	0.39903	FALSE
HGLibA_49999	TMEM151A	142.64/125.96/42.47	1.1468/7.4062/9.9214	91.397	4.4434	-4.0853	3107.1	5889.2	1.1331	0.013316	0.98668	0.026631	0.39903	FALSE
HGLibB_15814	EZH2	20.54/70.501/30.335	0/11.85/3.9686	35.297	1.5941	-3.8065	740.88	2274.4	0.7067	0.013324	0.98668	0.026648	0.39907	FALSE
HGLibA_63015	hsa-mir-671	15.975/30.081/0	0/6.6656/0	3.5472	0.30748	-1.7982	435.53	228.57	0.21429	0.013347	0.98665	0.026695	0.39967	FALSE
HGLibB_31341	NDC80	213.38/81.782/147.88	36.698/142.2/0	137.17	7.9601	-3.9468	4495.5	8838.9	1.3744	0.013351	0.98665	0.026701	0.39972	FALSE
HGLibB_06388	C5orf47	35.374/94.002/169.12	48.166/13.331/0	82.564	3.9172	-4.087	4924.8	5320.1	1.0783	0.013355	0.98665	0.026709	0.39974	FALSE
HGLibB_33413	OPTN	22.822/0/0	0/0/0	0.512	0	-0.59646	249.12	32.991	0.08914	0.013359	0.98664	0.026717	0.39974	FALSE
HGLibB_10509	COL17A1	22.822/0/0	0/0/0	0.512	0	-0.59646	249.12	32.991	0.08914	0.013359	0.98664	0.026717	0.39974	FALSE
HGLibA_36171	PFKP	75.312/144.76/191.87	72.249/0/52.584	127.9	7.1505	-3.9832	3571.1	8241.3	1.3301	0.013367	0.98663	0.026734	0.39985	FALSE
HGLibB_53674	VPS13D	132.37/77.081/234.34	103.21/45.178/0	133.73	7.6627	-3.9591	6666.7	8616.9	1.3581	0.013375	0.98662	0.026751	0.39996	FALSE
HGLibB_40281	RASGEF1B	0/22.56/0	0/0.74062/0	0.50966	0.10333	-0.45236	243.38	32.84	0.070905	0.013392	0.98661	0.026783	0.40029	FALSE
HGLibA_17417	FGF7	0/71.441/45.503	0/17.775/0	6.7841	0.46331	-2.4113	2862.9	437.14	0.30232	0.013419	0.98658	0.026838	0.40096	FALSE
HGLibA_38717	PRPF3	70.747/210.56/138.03	58.487/64.434/0	127.17	7.131	-3.9785	5127.9	8194.3	1.3261	0.013451	0.98655	0.026902	0.40167	FALSE
HGLibA_01995	ANKRD11	59.337/8.4602/0	0/0/6.945	3.6055	0.31301	-1.8105	1571.3	232.32	0.21601	0.013455	0.98655	0.02691	0.40173	FALSE
HGLibA_36151	PFDN6	52.49/14.1/209.31	6.8809/22.959/0	53.777	2.4249	-3.9994	12884	3465.1	0.87236	0.01346	0.98654	0.026919	0.40173	FALSE
HGLibB_14712	EIF2B1	75.312/49.821/273.78	61.928/22.959/0	100.92	5.1297	-4.0555	16573	6503.1	1.1879	0.013483	0.98652	0.026966	0.40232	FALSE
HGLibA_54050	WDR24	51.349/42.301/119.07	4.5872/0/58.536	63.722	2.9178	-4.0461	1837.5	4105.9	0.94891	0.013488	0.98651	0.026977	0.40233	FALSE
HGLibA_55921	ZNF398	0/21.62/0	0/0/0	0.50111	0	-0.58603	223.26	32.29	0.088187	0.013514	0.98649	0.027027	0.40268	FALSE
HGLibA_31518	NDUFB4	0/21.62/0	0/0/0	0.50111	0	-0.58603	223.26	32.29	0.088187	0.013514	0.98649	0.027027	0.40268	FALSE
HGLibA_16975	FBXL13	0/21.62/0	0/0/0	0.50111	0	-0.58603	223.26	32.29	0.088187	0.013514	0.98649	0.027027	0.40268	FALSE
HGLibB_22752	IGBP1	0/21.62/0	0/0/0	0.50111	0	-0.58603	223.26	32.29	0.088187	0.013514	0.98649	0.027027	0.40268	FALSE
HGLibB_07266	CASC10	78.735/34.781/46.261	57.341/2.2219/0	50.229	2.2715	-3.969	533.49	3236.6	0.84298	0.013529	0.98647	0.027057	0.40308	FALSE
HGLibB_53408	UVRAG	189.42/96.822/123.62	28.67/0/154.77	131.37	7.5379	-3.9546	2311.7	8465.1	1.3459	0.013534	0.98647	0.027067	0.40317	FALSE
HGLibA_24045	KANSL3	90.146/57.341/50.053	13.762/19.997/0	63.724	2.9314	-4.0412	462.88	4106.1	0.94871	0.013552	0.98645	0.027104	0.40348	FALSE
HGLibB_52205	TUBB	47.926/78.962/85.697	18.349/19.256/0	68.708	3.193	-4.0553	412.84	4427.2	0.98463	0.013557	0.98644	0.027115	0.40358	FALSE
HGLibA_51876	TSLP	1.1411/36.661/54.604	0/60.731/0	13.464	0.74731	-3.0493	1191.2	867.59	0.43175	0.01356	0.98644	0.027121	0.40362	FALSE
HGLibA_21846	HNRNPU	179.15/46.061/216.9	26.377/119.24/0	121.44	6.7111	-3.989	9062.1	7825.3	1.297	0.013571	0.98643	0.027142	0.40377	FALSE
HGLibB_08132	CCP110	61.619/29.141/0	0/13.331/0	5.5511	0.41212	-2.2139	1865.4	357.69	0.27172	0.013572	0.98643	0.027144	0.40377	FALSE
HGLibA_00648	ACTR10	38.797/72.381/37.161	1.1468/89.615/0	47.084	2.1364	-3.9384	403.55	3033.9	0.81603	0.013582	0.98642	0.027163	0.40395	FALSE
HGLibB_16298	FAM181B	130.08/131.6/84.939	131.88/17.775/0	113.29	6.079	-4.0131	710.56	7300.2	1.2548	0.013604	0.9864	0.027208	0.40446	FALSE
HGLibA_27004	LOC730183	83.299/50.761/108.45	0/14.072/37.701	77.119	3.6697	-4.0643	857.25	4969.2	1.0419	0.013606	0.98639	0.027211	0.40446	FALSE
HGLibB_23300	INO80E	0/31.961/19.718	0/0/7.9371	3.8903	0.33155	-1.8768	526.79	250.68	0.22477	0.01361	0.98639	0.027221	0.40453	FALSE
HGLibB_37302	PNKP	78.735/77.081/34.127	6.8809/31.847/0	59.175	2.7148	-4.0178	665.32	3812.9	0.91434	0.013615	0.98639	0.02723	0.40453	FALSE
HGLibB_43972	SHF	20.54/22.56/0	6.8809/0/0	3.5029	0.31175	-1.7794	332.85	225.71	0.21241	0.013636	0.98636	0.027273	0.40493	FALSE
HGLibA_56571	ZNF70	0/20.68/0	0/0/0	0.49231	0	-0.57755	204.02	31.722	0.087409	0.013643	0.98636	0.027285	0.40506	FALSE
HGLibA_15792	EXOSC8	30.809/45.121/0	0/11.85/0	5.0897	0.39255	-2.1286	1144.9	327.96	0.25937	0.013653	0.98635	0.027307	0.40528	FALSE
HGLibA_06742	C9orf57	20.54/0/0	0/0/0	0.49097	0	-0.57625	201.21	31.636	0.08729	0.013663	0.98634	0.027325	0.4054	FALSE
HGLibA_53865	VSTM2L	103.84/174.84/121.34	95.185/45.918/0	130.12	7.4972	-3.9478	1384	8384.4	1.3392	0.013667	0.98633	0.027334	0.40543	FALSE
HGLibB_10995	CPSF4	71.889/139.12/219.93	0/40.734/107.15	130.06	7.4941	-3.9477	5771.4	8380.7	1.3389	0.013671	0.98633	0.027342	0.40543	FALSE
HGLibB_07285	CASKIN2	0/29.141/65.979	0/14.072/0	5.6812	0.42136	-2.2328	2109.2	366.07	0.27491	0.013675	0.98633	0.02735	0.40546	FALSE
HGLibA_49893	TMEM119	27.386/29.141/82.664	2.2936/31.106/0	40.418	1.8548	-3.8588	1040.9	2604.3	0.75565	0.013677	0.98632	0.027354	0.40548	FALSE
HGLibB_04797	BRF2	270.44/82.722/227.52	207.57/82.949/0	172.03	11.892	-3.7464	10369	11085	1.521	0.013696	0.9863	0.027392	0.40564	FALSE
HGLibA_08115	CCNK	42.22/113.74/129.68	32.111/24.44/0	85.411	4.1917	-4.0569	2314.1	5503.5	1.0948	0.013709	0.98629	0.027418	0.40574	FALSE
HGLibB_41599	RNF24	0/67.681/39.436	0/0/16.866	6.3471	0.4536	-2.3376	2448.5	408.98	0.29142	0.013716	0.98628	0.027431	0.40574	FALSE
HGLibB_02785	ARHGAP6	28.527/0/59.912	0/13.331/0	5.4591	0.41212	-2.1935	1763.5	351.76	0.2691	0.013716	0.98628	0.027433	0.40574	FALSE
HGLibA_09260	CFH	28.527/0/41.711	0/11.109/0	4.8282	0.38216	-2.0761	972.65	311.11	0.25207	0.013737	0.98626	0.027473	0.40614	FALSE
HGLibA_40152	RALBP1	17.116/156.04/53.087	34.404/4.4437/0	52.19	2.4028	-3.9664	6008.2	3362.9	0.85855	0.013764	0.98624	0.027527	0.40673	FALSE
HGLibA_13954	DRAXIN	0/43.241/31.094	0/0/11.906	5.0324	0.39332	-2.1142	1082.2	324.27	0.25762	0.013777	0.98622	0.027555	0.40695	FALSE
HGLibA_55871	ZNF358	0/19.74/0	0/0/0	0.48324	0	-0.56876	185.65	31.138	0.0866	0.013779	0.98622	0.027559	0.40695	FALSE
HGLibB_22754	IGDCC3	0/19.74/0	0/0/0	0.48324	0	-0.56876	185.65	31.138	0.0866	0.013779	0.98622	0.027559	0.40695	FALSE
HGLibA_27068	LPAR6	12.552/0/23.51	5.7341/0/0	3.0028	0.28784	-1.636	260.37	193.49	0.19518	0.013806	0.98619	0.027612	0.40758	FALSE
HGLibA_06067	C22orf29	66.183/77.081/87.973	28.67/0/18.851	76.563	3.6919	-4.0471	119.09	4933.4	1.0375	0.013813	0.98619	0.027626	0.40773	FALSE
HGLibB_24005	KANSL1L	173.45/22.56/43.228	12.615/14.812/0	55.339	2.5666	-3.9815	7585.1	3565.8	0.88375	0.013831	0.98617	0.027662	0.40812	FALSE
HGLibB_08332	CD300LD	19.398/0/0	0/0/0	0.47987	0	-0.56547	179.19	30.921	0.086298	0.013831	0.98617	0.027662	0.40812	FALSE
HGLibB_39029	PSMA4	19.398/0/0	0/0/0	0.47987	0	-0.56547	179.19	30.921	0.086298	0.013831	0.98617	0.027662	0.40812	FALSE
HGLibA_44382	SLC12A9	82.158/92.122/160.02	0/37.031/51.591	106.6	5.6683	-4.0122	1830.3	6868.6	1.2178	0.013834	0.98617	0.027669	0.40817	FALSE
HGLibA_20968	HCK	102.7/137.24/56.879	47.019/23.7/0	92.904	4.7223	-4.0365	1679.8	5986.3	1.1397	0.013873	0.98613	0.027745	0.40889	FALSE
HGLibA_06822	CA7	35.374/0/78.872	0/17.775/0	6.4432	0.46331	-2.3467	3062.2	415.17	0.29348	0.013875	0.98612	0.02775	0.40891	FALSE
HGLibA_08082	CCNDBP1	36.515/173.9/173.67	45.872/37.031/0	103.35	5.4472	-4.0166	7194.8	6659.4	1.1997	0.013877	0.98612	0.027754	0.40891	FALSE
HGLibA_20768	H2AFZ	58.195/0/47.778	0/17.775/0	6.4352	0.46331	-2.3451	2214.9	414.65	0.29327	0.013886	0.98611	0.027773	0.40909	FALSE
HGLibA_60197	hsa-mir-4448	0/0/18.96	0/0/0	0.47549	0	-0.56119	171.06	30.638	0.085903	0.013899	0.9861	0.027799	0.40923	FALSE
HGLibB_30059	MRPS36	54.772/184.24/97.073	0/14.072/103.18	99.328	5.1701	-4.0233	4600.5	6400.3	1.177	0.013901	0.9861	0.027802	0.40923	FALSE
HGLibA_24380	KCNRG	7.9876/11.28/0	3.4404/0/0	1.9957	0.22836	-1.2861	63.044	128.59	0.15585	0.013905	0.98609	0.027811	0.4093	FALSE
HGLibB_34606	OSBPL2	148.34/202.1/81.905	107.8/50.362/0	134.92	8.0657	-3.9062	3752.2	8693.6	1.3605	0.013917	0.98608	0.027834	0.40951	FALSE
HGLibA_31528	NDUFB7	59.337/97.762/147.88	11.468/106.65/0	95.025	4.8798	-4.0296	2037.7	6123	1.152	0.013918	0.98608	0.027837	0.40951	FALSE
HGLibB_36222	PGM3	41.079/49.821/108.45	0/50.362/4.9607	60.554	2.8448	-4.0009	1394.2	3901.9	0.92387	0.01392	0.98608	0.027841	0.40951	FALSE
HGLibB_14150	DUSP27	39.938/120.32/205.52	90.598/16.294/0	99.613	5.1977	-4.0209	7603.4	6418.6	1.1785	0.013923	0.98608	0.027845	0.40951	FALSE
HGLibB_42017	RPS13	0/19.74/42.47	0/9.628/0	4.2875	0.35991	-1.9591	857.52	276.27	0.2363	0.013923	0.98608	0.027846	0.40951	FALSE
HGLibB_36373	PHLDA2	0/18.8/0	0/0/0	0.47388	0	-0.55962	168.15	30.535	0.085758	0.013925	0.98608	0.027849	0.40951	FALSE
HGLibB_18808	GCSH	25.104/25.38/59.912	8.0277/5.9249/0	33.678	1.5981	-3.7385	415.3	2170.1	0.68865	0.013943	0.98606	0.027886	0.4099	FALSE
HGLibA_19824	GPN1	524.9/664.59/563.48	151.38/131.83/216.29	581.44	162.82	-1.83	5216.8	37465	2.1627	0.013967	0.98603	0.027934	0.4104	FALSE
HGLibA_63419	hsa-mir-6810	98.134/54.521/65.221	0/103.69/3.9686	70.406	3.3823	-4.0263	524.02	4536.6	0.99508	0.013973	0.98603	0.027945	0.41052	FALSE
HGLibA_04628	BMPR1A	138.07/62.981/43.986	44.726/10.369/0	72.601	3.5069	-4.0295	2598.9	4678.1	1.0102	0.013979	0.98602	0.027957	0.41061	FALSE
HGLibA_05985	C20orf112	70.747/97.762/232.07	74.543/39.253/0	117.1	6.5474	-3.9678	7870	7545.1	1.2727	0.013988	0.98601	0.027976	0.41072	FALSE
HGLibA_37333	PMS1	43.361/107.16/57.637	4.5872/67.396/0	64.466	3.0628	-4.0102	1157.5	4153.9	0.95271	0.013988	0.98601	0.027975	0.41072	FALSE
HGLibA_01625	ALG2	148.34/79.902/81.147	92.892/15.553/0	98.714	5.1603	-4.0167	1562.7	6360.7	1.173	0.013994	0.98601	0.027989	0.41072	FALSE
HGLibB_29442	MMP11	49.067/40.421/105.42	4.5872/51.843/0	59.36	2.7983	-3.9901	1292.9	3824.9	0.91456	0.013994	0.98601	0.027989	0.41072	FALSE
HGLibB_16957	FBXL14	148.34/151.34/55.362	35.551/0/57.544	107.53	5.8012	-3.9962	3153.3	6928.8	1.2221	0.013995	0.98601	0.027989	0.41072	FALSE
HGLibA_53753	VPS26A	1.1411/25.38/24.268	32.111/0/0	9.0681	0.58549	-2.6668	279.99	584.31	0.35092	0.013999	0.986	0.027998	0.41079	FALSE
HGLibB_35790	PDF	18.257/0/0	0/0/0	0.46833	0	-0.55418	158.44	30.177	0.085254	0.014013	0.98599	0.028025	0.41099	FALSE
HGLibA_58621	hsa-mir-3141	18.257/0/0	0/0/0	0.46833	0	-0.55418	158.44	30.177	0.085254	0.014013	0.98599	0.028025	0.41099	FALSE
HGLibB_20284	GRIN3A	20.54/19.74/0	6.8809/0/0	3.3468	0.31175	-1.7285	287.77	215.65	0.20668	0.014016	0.98598	0.028032	0.41104	FALSE
HGLibB_06672	C9orf131	0/45.121/85.697	0/0/21.827	7.1935	0.50301	-2.4466	3826.5	463.52	0.31076	0.014026	0.98597	0.028052	0.41129	FALSE
HGLibB_46222	SOX9	147.2/129.72/257.09	216.75/79.987/0	169.96	11.92	-3.726	4864.5	10952	1.5102	0.014053	0.98595	0.028106	0.4119	FALSE
HGLibB_43542	SERPINH1	118.67/47.001/59.154	0/3.7031/106.16	69.108	3.3316	-4.0166	1522.3	4453	0.98569	0.014064	0.98594	0.028129	0.4121	FALSE
HGLibA_30420	MTMR14	0/17.86/0	0/0/0	0.46421	0	-0.55012	151.53	29.911	0.084878	0.014079	0.98592	0.028158	0.41235	FALSE
HGLibB_00246	ABHD13	0/17.86/0	0/0/0	0.46421	0	-0.55012	151.53	29.911	0.084878	0.014079	0.98592	0.028158	0.41235	FALSE
HGLibA_14198	DUT	0/17.86/0	0/0/0	0.46421	0	-0.55012	151.53	29.911	0.084878	0.014079	0.98592	0.028158	0.41235	FALSE
HGLibA_06066	C22orf28	61.619/0/86.456	26.377/0/0	8.0141	0.54213	-2.5473	4545.4	516.39	0.32881	0.01408	0.98592	0.02816	0.41235	FALSE
HGLibB_08375	CD4	61.619/0/56.12	0/20.737/0	6.927	0.49285	-2.4087	2729.6	446.35	0.30455	0.014085	0.98591	0.028171	0.41246	FALSE
HGLibA_19251	GLI2	73.03/23.5/50.812	0/10.369/9.9214	44.357	2.0891	-3.8761	649.38	2858.2	0.79062	0.014094	0.98591	0.028188	0.41261	FALSE
HGLibA_36818	PKIA	10.27/35.721/0	0/6.6656/0	3.2366	0.30748	-1.6961	557.58	208.55	0.20283	0.014104	0.9859	0.028208	0.41285	FALSE
HGLibA_46942	SRD5A2	126.66/221.84/129.68	71.102/148.86/0	153.89	10.098	-3.8028	2972.6	9915.8	1.444	0.014109	0.98589	0.028218	0.4129	FALSE
HGLibB_32863	NUBPL	0/42.301/50.053	16.055/0/0	5.8689	0.44463	-2.2494	1657	378.16	0.27893	0.014137	0.98586	0.028274	0.41341	FALSE
HGLibB_56034	ZNF496	83.299/113.74/105.42	51.606/30.365/0	99.96	5.3007	-4.0021	248.64	6441	1.1795	0.01414	0.98586	0.028281	0.41341	FALSE
HGLibB_54164	WDSUB1	37.656/60.161/32.611	57.341/1.4812/0	41.963	1.9864	-3.8466	218.59	2703.9	0.7688	0.01414	0.98586	0.028281	0.41341	FALSE
HGLibA_35626	PCMT1	53.631/59.221/27.302	3.4404/0/29.764	44.268	2.0948	-3.8706	299.56	2852.4	0.78964	0.014161	0.98584	0.028322	0.41397	FALSE
HGLibA_48146	TAB3	101.56/56.401/56.879	28.67/14.072/0	68.813	3.3418	-4.0071	684.32	4434	0.98322	0.01418	0.98582	0.028359	0.41431	FALSE
HGLibA_04902	BTBD16	20.54/100.58/0	16.055/0/0	5.8231	0.44463	-2.2397	4614.9	375.22	0.27766	0.014208	0.98579	0.028415	0.41472	FALSE
HGLibA_54381	WNT7A	17.116/0/0	0/0/0	0.45631	0	-0.54231	138.99	29.402	0.084152	0.014209	0.98579	0.028418	0.41472	FALSE
HGLibB_50891	TOMM20	17.116/0/0	0/0/0	0.45631	0	-0.54231	138.99	29.402	0.084152	0.014209	0.98579	0.028418	0.41472	FALSE
HGLibB_11939	CXorf58	17.116/0/0	0/0/0	0.45631	0	-0.54231	138.99	29.402	0.084152	0.014209	0.98579	0.028418	0.41472	FALSE
HGLibB_22181	HSD3B7	20.54/0/109.97	0/0/16.866	6.0017	0.4536	-2.2681	5527.9	386.72	0.28213	0.014218	0.98578	0.028436	0.41491	FALSE
HGLibB_24450	KDELR3	98.134/150.4/76.597	68.809/27.403/0	104.18	5.644	-3.9846	1467	6712.8	1.2026	0.014236	0.98576	0.028472	0.41524	FALSE
HGLibA_49805	TMED2	19.398/51.701/0	0/11.109/0	4.5571	0.38216	-2.0074	1231.8	293.64	0.24364	0.014239	0.98576	0.028479	0.41524	FALSE
HGLibB_32817	NTN5	42.22/34.781/129.68	0/19.256/11.906	57.548	2.7537	-3.9633	2978.4	3708.1	0.89982	0.014243	0.98576	0.028486	0.41524	FALSE
HGLibB_12277	DAD1	45.644/28.201/0	12.615/0/0	4.9587	0.40285	-2.0866	1110	319.52	0.25487	0.014243	0.98576	0.028486	0.41524	FALSE
HGLibB_56848	ZNF98	0/16.92/0	0/0/0	0.45419	0	-0.54021	135.77	29.266	0.083956	0.014244	0.98576	0.028489	0.41524	FALSE
HGLibA_62772	hsa-mir-633	0/16.92/0	0/0/0	0.45419	0	-0.54021	135.77	29.266	0.083956	0.014244	0.98576	0.028489	0.41524	FALSE
HGLibA_50341	TMEM258	0/16.92/0	0/0/0	0.45419	0	-0.54021	135.77	29.266	0.083956	0.014244	0.98576	0.028489	0.41524	FALSE
HGLibB_38661	PRPF18	0/16.92/0	0/0.74062/0	0.45419	0.10333	-0.39835	135.77	29.266	0.064856	0.014244	0.98576	0.028489	0.41524	FALSE
HGLibA_46746	SPOCD1	68.465/55.461/164.57	51.606/17.034/0	85.504	4.358	-4.013	3722.1	5509.5	1.0932	0.014251	0.98575	0.028501	0.41537	FALSE
HGLibA_06510	C6orf70	20.54/59.221/335.21	0/53.325/9.9214	74.222	3.669	-4.01	35610	4782.5	1.0202	0.014257	0.98574	0.028513	0.41549	FALSE
HGLibA_30472	MTRNR2L1	0/47.001/55.362	18.349/0/0	6.2926	0.46928	-2.3113	2052.3	405.47	0.2892	0.014271	0.98573	0.028541	0.4158	FALSE
HGLibB_36098	PFDN4	36.515/79.902/219.93	34.404/26.662/0	86.28	4.4199	-4.0093	10190	5559.5	1.0979	0.014291	0.98571	0.028582	0.41625	FALSE
HGLibB_27032	LPCAT1	214.52/83.662/122.1	53.9/0/91.277	129.9	7.8021	-3.8944	4680.2	8370	1.3345	0.014296	0.9857	0.028592	0.41628	FALSE
HGLibB_00655	ACTR2	41.079/20.68/0	10.321/0/0	4.3067	0.37059	-1.953	819.43	277.5	0.23628	0.014298	0.9857	0.028596	0.41628	FALSE
HGLibB_13729	DOCK5	74.171/23.5/0	14.909/0/0	5.4965	0.43143	-2.1822	2535.3	354.17	0.26914	0.014299	0.9857	0.028599	0.41628	FALSE
HGLibA_44772	SLC25A53	67.324/127.84/188.84	27.523/115.54/0	117.58	6.7358	-3.9382	3854.2	7576.6	1.2735	0.01432	0.98568	0.02864	0.41673	FALSE
HGLibA_57968	hsa-mir-181b-1	131.23/47.941/121.34	0/38.512/29.764	91.404	4.7673	-4.002	2185.5	5889.7	1.1289	0.01432	0.98568	0.02864	0.41673	FALSE
HGLibB_05873	C1orf56	233.92/34.781/134.23	55.047/2.9625/0.99214	103.02	5.5923	-3.9799	11383	6638.2	1.1958	0.014327	0.98567	0.028654	0.41686	FALSE
HGLibB_41947	RPL7L1	100.42/124.08/131.2	0/39.993/80.363	117.8	6.7584	-3.9366	260.62	7590.6	1.2745	0.01433	0.98567	0.02866	0.41686	FALSE
HGLibA_58119	hsa-mir-1976	168.88/156.04/94.798	108.95/55.546/0	135.69	8.3661	-3.8673	1594	8743.4	1.3617	0.014332	0.98567	0.028664	0.41688	FALSE
HGLibA_53441	UTP15	15.975/50.761/57.637	13.762/4.4437/0	36.041	1.7468	-3.7533	542.85	2322.3	0.71164	0.014338	0.98566	0.028677	0.41701	FALSE
HGLibA_05791	C1orf172	58.195/86.482/53.087	25.23/13.331/0	64.409	3.1403	-3.9817	327	4150.2	0.95105	0.014364	0.98564	0.028729	0.41753	FALSE
HGLibB_42141	RPS9	35.374/0/0	0/0/0.99214	0.6079	0.12187	-0.51927	604.7	39.17	0.077658	0.014365	0.98563	0.028731	0.41753	FALSE
HGLibA_41943	RPL34	99.275/61.101/76.597	16.055/39.253/0	77.454	3.8911	-4.0036	372.15	4990.8	1.0413	0.014373	0.98563	0.028747	0.41757	FALSE
HGLibB_29905	MRPL3	49.067/31.021/0	0/14.072/0	5.2486	0.42136	-2.1363	1305.9	338.2	0.26249	0.014378	0.98562	0.028755	0.4176	FALSE
HGLibB_02110	ANKRD49	116.39/170.14/31.852	34.404/26.662/0	85.792	4.4199	-4.0012	5480.5	5528.1	1.0944	0.014397	0.9856	0.028794	0.418	FALSE
HGLibA_06499	C6orf58	92.428/171.08/157.74	74.543/82.209/0	135.62	8.4011	-3.8612	1806.3	8739	1.3609	0.014408	0.98559	0.028816	0.4181	FALSE
HGLibA_42836	SCAMP1	76.453/95.882/157.74	18.349/109.61/0	104.97	5.7714	-3.968	1840.5	6763.5	1.2061	0.014415	0.98559	0.028829	0.4181	FALSE
HGLibB_50877	TOE1	0/15.98/0	0/0/0	0.44379	0	-0.52986	120.89	28.596	0.08299	0.014422	0.98558	0.028844	0.4181	FALSE
HGLibA_59688	hsa-mir-412	0/15.98/0	0/0/0	0.44379	0	-0.52986	120.89	28.596	0.08299	0.014422	0.98558	0.028844	0.4181	FALSE
HGLibA_34247	OR5AR1	0/15.98/0	0/0/0	0.44379	0	-0.52986	120.89	28.596	0.08299	0.014422	0.98558	0.028844	0.4181	FALSE
HGLibB_45206	SLC5A11	0/15.98/0	0/0/0	0.44379	0	-0.52986	120.89	28.596	0.08299	0.014422	0.98558	0.028844	0.4181	FALSE
HGLibB_19135	GJB2	15.975/0/0	0/0/0	0.44373	0	-0.5298	120.81	28.592	0.082985	0.014423	0.98558	0.028846	0.4181	FALSE
HGLibB_36011	PER2	15.975/0/0	0/0/0	0.44373	0	-0.5298	120.81	28.592	0.082985	0.014423	0.98558	0.028846	0.4181	FALSE
HGLibA_01395	AK7	15.975/0/0	0/0/0	0.44373	0	-0.5298	120.81	28.592	0.082985	0.014423	0.98558	0.028846	0.4181	FALSE
HGLibA_05584	C17orf82	111.83/0/5.3087	0/8.8874/0	3.8265	0.34793	-1.8402	5840.4	246.56	0.22153	0.014429	0.98557	0.028858	0.41823	FALSE
HGLibA_51490	TRIM4	5.7054/30.081/0	0/0/4.9607	2.4973	0.26989	-1.4615	388.68	160.91	0.17559	0.014431	0.98557	0.028863	0.41823	FALSE
HGLibA_49113	TEX9	0/3.7601/62.187	5.7341/0/0	2.7862	0.28784	-1.5558	1768.6	179.53	0.18646	0.014433	0.98557	0.028865	0.41823	FALSE
HGLibA_12210	CYP7A1	141.49/22.56/21.235	8.0277/0/10.914	40.807	1.9763	-3.8121	5427	2629.4	0.75726	0.014453	0.98555	0.028906	0.41856	FALSE
HGLibB_40924	RFX5	55.913/97.762/148.64	38.992/0/32.741	93.322	4.9447	-3.9879	2239.8	6013.2	1.1397	0.014462	0.98554	0.028924	0.4187	FALSE
HGLibB_24079	KBTBD7	119.81/193.64/45.503	0/51.843/34.725	101.84	5.5555	-3.9716	5962.2	6562.4	1.1886	0.014463	0.98554	0.028926	0.4187	FALSE
HGLibB_04458	BGLAP	38.797/46.061/47.02	10.321/10.369/0	43.8	2.1179	-3.8449	20.254	2822.3	0.7846	0.014471	0.98553	0.028941	0.41882	FALSE
HGLibA_55724	ZNF280A	30.809/0/86.456	0/19.256/0	6.3436	0.47846	-2.3124	3528.4	408.75	0.2901	0.014475	0.98552	0.02895	0.4189	FALSE
HGLibA_59874	hsa-mir-4291	39.938/47.001/0	16.055/0/0	5.6346	0.44463	-2.1993	1459.8	363.07	0.27238	0.014508	0.98549	0.029017	0.41966	FALSE
HGLibA_15908	FABP1	43.361/15.04/64.463	2.2936/0/24.804	34.793	1.7132	-3.7216	671.93	2241.9	0.69864	0.014522	0.98548	0.029045	0.41983	FALSE
HGLibA_37074	PLEKHA5	174.59/163.56/131.2	182.34/65.915/0	155.31	10.54	-3.7598	510.47	10008	1.4472	0.014532	0.98547	0.029063	0.41987	FALSE
HGLibA_47256	ST5	43.361/70.501/71.288	12.615/22.219/0	60.181	2.9502	-3.9531	256.39	3877.8	0.91905	0.014547	0.98545	0.029095	0.42004	FALSE
HGLibB_53374	UTP15	13.693/0/34.127	8.0277/0/0	3.5142	0.33317	-1.7596	526.56	226.44	0.21139	0.014547	0.98545	0.029094	0.42004	FALSE
HGLibB_28872	MESDC2	52.49/39.481/0	0/17.034/0	5.8265	0.45542	-2.2297	1672	375.43	0.2772	0.014548	0.98545	0.029096	0.42004	FALSE
HGLibB_09777	CKS1B	67.324/76.141/104.66	0/32.587/23.811	81.257	4.1756	-3.9904	383.92	5235.9	1.0653	0.014556	0.98544	0.029112	0.4202	FALSE
HGLibA_49533	TIMMDC1	83.299/71.441/71.288	0/29.625/19.843	75.14	3.7991	-3.9878	47.547	4841.7	1.0253	0.014557	0.98544	0.029114	0.4202	FALSE
HGLibA_28657	MCTS1	0/18.8/41.711	0/10.369/0	4.1913	0.3713	-1.9205	819.36	270.07	0.23245	0.014567	0.98543	0.029134	0.42038	FALSE
HGLibA_23810	ITIH3	9.1287/0/125.89	12.615/0/0	4.7808	0.40285	-2.0429	7354.8	308.06	0.24944	0.014572	0.98543	0.029144	0.42048	FALSE
HGLibB_18264	FZR1	78.735/85.542/205.52	0/48.881/54.568	111.46	6.3454	-3.9364	5295.3	7181.7	1.2403	0.014581	0.98542	0.029161	0.42065	FALSE
HGLibA_62696	hsa-mir-615	29.668/26.321/0	0/10.369/0	4.1845	0.3713	-1.9187	578.47	269.63	0.23222	0.014581	0.98542	0.029163	0.42065	FALSE
HGLibB_14180	DUX2	0/0/15.168	0/0/0	0.43447	0	-0.52052	108.72	27.995	0.082114	0.014586	0.98541	0.029173	0.4207	FALSE
HGLibA_11092	CREB3L1	28.527/34.781/67.496	107.8/0.74062/0	40.616	1.9855	-3.8011	451.37	2617.1	0.75512	0.014587	0.98541	0.029173	0.4207	FALSE
HGLibB_06718	C9orf3	28.527/23.5/0	0/9.628/0	3.9729	0.35991	-1.8706	500.01	255.99	0.22581	0.01459	0.98541	0.029179	0.42072	FALSE
HGLibB_09725	CISD3	0/47.941/0	1.1468/0/0	0.6832	0.13188	-0.57248	1117.1	44.022	0.083093	0.014594	0.98541	0.029188	0.42072	FALSE
HGLibB_34906	PACRGL	28.527/0/40.194	12.615/0/0	4.7679	0.40285	-2.0397	921.14	307.22	0.24904	0.014597	0.9854	0.029193	0.42072	FALSE
HGLibB_53418	VAC14	70.747/52.641/21.993	16.055/6.6656/0	43.442	2.1193	-3.8327	645.13	2799.2	0.78104	0.014598	0.9854	0.029196	0.42072	FALSE
HGLibB_55438	ZNF155	41.079/93.062/70.53	13.762/25.922/0	64.609	3.2041	-3.964	699.13	4163.1	0.95169	0.014611	0.98539	0.029223	0.421	FALSE
HGLibA_33049	NUP35	0/15.04/0	0/0/0	0.43298	0	-0.51902	106.87	27.899	0.081973	0.014613	0.98539	0.029226	0.421	FALSE
HGLibB_06077	C22orf43	0/15.04/0	0/0/0	0.43298	0	-0.51902	106.87	27.899	0.081973	0.014613	0.98539	0.029226	0.421	FALSE
HGLibB_54108	WDR75	39.938/71.441/82.664	14.909/20.737/0	61.79	3.0506	-3.9543	503.18	3981.5	0.93091	0.014616	0.98538	0.029233	0.42105	FALSE
HGLibA_37109	PLEKHG4	123.24/83.662/126.65	41.285/59.99/0	109.3	6.1885	-3.9396	576.29	7043	1.2287	0.014619	0.98538	0.029237	0.42105	FALSE
HGLibB_46214	SOX6	37.656/59.221/143.33	48.166/0/8.9293	68.388	3.4191	-3.9729	3322.7	4406.6	0.97871	0.014622	0.98538	0.029244	0.42106	FALSE
HGLibA_23675	ISM1	0/15.98/3.0335	0/2.9625/0	1.6144	0.21287	-1.1081	105.5	104.02	0.13741	0.014631	0.98537	0.029262	0.42126	FALSE
HGLibA_32386	NOXO1	180.29/80.842/87.973	18.349/131.83/0	108.65	6.1437	-3.94	3166.8	7000.6	1.2251	0.014637	0.98536	0.029274	0.42126	FALSE
HGLibA_03440	ATF4	9.1287/23.5/49.295	1.1468/16.294/0	21.976	1.1691	-3.4049	456.86	1416	0.55293	0.014638	0.98536	0.029275	0.42126	FALSE
HGLibB_05720	C1GALT1	378.84/208.68/365.54	25.23/99.984/25.796	306.88	40.24	-2.9002	9131.1	19774	1.8962	0.014639	0.98536	0.029279	0.42126	FALSE
HGLibA_63609	hsa-mir-6859-1	104.98/242.52/61.429	38.992/82.209/0	116.09	6.7524	-3.9169	9548.3	7480.5	1.2642	0.014639	0.98536	0.029278	0.42126	FALSE
HGLibB_18128	FUBP3	33.092/95.882/191.11	45.872/19.997/0	84.67	4.4207	-3.9822	7058	5455.8	1.0865	0.014647	0.98535	0.029295	0.42138	FALSE
HGLibA_10748	COQ2	14.834/0/0	0/0/0	0.43055	0	-0.51657	103.92	27.743	0.081743	0.014657	0.98534	0.029314	0.42138	FALSE
HGLibA_62988	hsa-mir-663b	14.834/0/0	0/0/0	0.43055	0	-0.51657	103.92	27.743	0.081743	0.014657	0.98534	0.029314	0.42138	FALSE
HGLibB_54565	YAP1	14.834/0/0	0/0/0	0.43055	0	-0.51657	103.92	27.743	0.081743	0.014657	0.98534	0.029314	0.42138	FALSE
HGLibB_46088	SOD1	14.834/0/0	0/0/0	0.43055	0	-0.51657	103.92	27.743	0.081743	0.014657	0.98534	0.029314	0.42138	FALSE
HGLibB_48905	TEFM	138.07/48.881/194.9	0/28.884/87.308	109.59	6.2276	-3.9356	5887.7	7061.4	1.23	0.014659	0.98534	0.029317	0.42138	FALSE
HGLibA_32965	NUDT19	52.49/0/47.778	0/19.256/0	6.2146	0.47846	-2.2868	1953.8	400.44	0.28665	0.014668	0.98533	0.029336	0.42147	FALSE
HGLibA_42973	SCN1A	25.104/23.5/0	9.1745/0/0	3.8036	0.35265	-1.8283	428.07	245.09	0.22043	0.014679	0.98532	0.029358	0.42163	FALSE
HGLibB_14357	ECD	0/57.341/41.711	0/0/18.851	6.1159	0.47439	-2.2709	1964.2	394.08	0.28419	0.014693	0.98531	0.029386	0.42197	FALSE
HGLibA_30659	MYBPH	37.656/73.321/25.027	1.1468/0/76.395	41.045	2.0207	-3.799	654.92	2644.7	0.75882	0.0147	0.9853	0.029399	0.42207	FALSE
HGLibB_53733	VPS4B	125.52/0/65.221	37.845/0/0	9.262	0.62396	-2.6597	8366.5	596.8	0.35359	0.01471	0.98529	0.029421	0.42226	FALSE
HGLibA_51219	TPX2	69.606/59.221/157.74	16.055/62.953/0	86.643	4.5702	-3.9758	3048.8	5582.9	1.0984	0.014713	0.98529	0.029426	0.42226	FALSE
HGLibB_37590	POLRMT	84.441/75.201/87.214	22.936/36.29/0	82.121	4.2766	-3.9776	39.6	5291.5	1.0701	0.01472	0.98528	0.029441	0.42241	FALSE
HGLibA_15007	EMC2	118.67/26.321/97.073	4.5872/89.615/0	67.208	3.3774	-3.9618	2606.2	4330.6	0.96997	0.014736	0.98526	0.029472	0.42276	FALSE
HGLibA_56044	ZNF467	109.54/164.5/175.95	122.71/77.765/0	146.91	9.752	-3.7821	1274.4	9466.3	1.4097	0.01475	0.98525	0.029499	0.42295	FALSE
HGLibB_45596	SMC3	21.681/63.921/100.11	6.8809/26.662/0	51.792	2.5534	-3.893	1694.1	3337.2	0.85233	0.014762	0.98524	0.029523	0.42324	FALSE
HGLibB_06057	C22orf26	0/38.541/138.03	0/0/29.764	8.0116	0.56842	-2.5225	8950	516.23	0.32759	0.014769	0.98523	0.029537	0.42331	FALSE
HGLibB_14310	E4F1	122.1/28.201/56.879	37.845/0/6.945	58.091	2.89	-3.9251	2495.8	3743.1	0.90225	0.014811	0.98519	0.029622	0.4241	FALSE
HGLibB_27382	LRRC72	0/14.1/0	0/0/0	0.42171	0	-0.50763	93.729	27.173	0.0809	0.01482	0.98518	0.02964	0.42411	FALSE
HGLibA_31706	NETO2	0/14.1/0	0/0/0	0.42171	0	-0.50763	93.729	27.173	0.0809	0.01482	0.98518	0.02964	0.42411	FALSE
HGLibB_40614	RC3H2	0/14.1/0	0/0/0	0.42171	0	-0.50763	93.729	27.173	0.0809	0.01482	0.98518	0.02964	0.42411	FALSE
HGLibA_22658	IFNA10	41.079/47.941/38.678	2.2936/44.437/0	42.39	2.1009	-3.8066	23.156	2731.4	0.77089	0.014821	0.98518	0.029642	0.42411	FALSE
HGLibB_22492	ID1	138.07/157.92/184.29	83.717/170.34/0	158.98	11.163	-3.7174	539.36	10244	1.4605	0.014822	0.98518	0.029644	0.42411	FALSE
HGLibA_24418	KCTD11	22.822/0/38.678	11.468/0/0	4.3628	0.38725	-1.9508	768.63	281.12	0.23711	0.014824	0.98518	0.029647	0.42411	FALSE
HGLibA_03553	ATP11A	102.7/173.9/169.88	81.424/111.09/0	144.77	9.578	-3.7846	1624.6	9328.3	1.3997	0.01484	0.98516	0.029681	0.42453	FALSE
HGLibB_28007	MAML3	41.079/0/35.644	14.909/0/0	5.1799	0.43143	-2.1101	1121.8	333.77	0.25991	0.014845	0.98516	0.02969	0.42461	FALSE
HGLibA_43217	SEC22C	135.79/47.001/113	0/34.068/34.725	89.689	4.8186	-3.9622	2245.4	5779.2	1.1164	0.01485	0.98515	0.0297	0.42471	FALSE
HGLibA_56968	ZPLD1	22.822/0/63.704	0/0/14.882	5.1686	0.43112	-2.1078	1882.4	333.04	0.2596	0.014854	0.98515	0.029709	0.42478	FALSE
HGLibB_12958	DEPDC1B	38.797/0/69.771	0/20.737/0	6.3775	0.49285	-2.3051	2555.2	410.94	0.29029	0.014861	0.98514	0.029722	0.42492	FALSE
HGLibA_62231	hsa-mir-568	0/15.04/34.886	0/0/8.9293	3.6556	0.34863	-1.7875	559.15	235.55	0.21547	0.014865	0.98513	0.02973	0.42494	FALSE
HGLibB_08477	CD96	0/16.92/41.711	0/10.369/0	4.044	0.3713	-1.879	800.48	260.58	0.22752	0.01489	0.98511	0.02978	0.42544	FALSE
HGLibA_19913	GPR142	37.656/12.22/48.537	0/3.7031/9.9214	28.183	1.462	-3.5672	379.41	1816	0.62704	0.014913	0.98509	0.029826	0.42566	FALSE
HGLibB_41320	RMI1	13.693/0/0	0/0/0	0.41668	0	-0.50251	88.305	26.849	0.080415	0.014915	0.98508	0.029831	0.42566	FALSE
HGLibB_38484	PRKCA	13.693/0/0	0/0/0	0.41668	0	-0.50251	88.305	26.849	0.080415	0.014915	0.98508	0.029831	0.42566	FALSE
HGLibA_42631	SAE1	13.693/0/0	0/0/0	0.41668	0	-0.50251	88.305	26.849	0.080415	0.014915	0.98508	0.029831	0.42566	FALSE
HGLibA_63026	hsa-mir-6716	13.693/0/0	0/0/0	0.41668	0	-0.50251	88.305	26.849	0.080415	0.014915	0.98508	0.029831	0.42566	FALSE
HGLibA_21220	HEY2	13.693/0/0	0/0/0	0.41668	0	-0.50251	88.305	26.849	0.080415	0.014915	0.98508	0.029831	0.42566	FALSE
HGLibA_52737	UBQLN3	13.693/0/0	0/0/0	0.41668	0	-0.50251	88.305	26.849	0.080415	0.014915	0.98508	0.029831	0.42566	FALSE
HGLibB_25815	KRTAP9-9	0/11.28/18.96	0/5.9249/0	2.6888	0.29203	-1.5135	172.89	173.26	0.18209	0.014954	0.98505	0.029908	0.42663	FALSE
HGLibA_61855	hsa-mir-548ab	47.926/49.821/0.75838	0/69.618/0	12.62	0.78671	-2.9303	1385.6	813.16	0.41496	0.014963	0.98504	0.029926	0.42676	FALSE
HGLibA_20812	HADHB	0/91.182/38.678	0/24.44/0	6.9738	0.52608	-2.3854	4072.4	449.36	0.30417	0.014973	0.98503	0.029945	0.42688	FALSE
HGLibA_28518	MBOAT1	0/55.461/32.611	0/17.034/0	5.5644	0.45542	-2.1732	1626.1	358.54	0.26981	0.01498	0.98502	0.02996	0.42689	FALSE
HGLibA_60895	hsa-mir-4697	29.668/0/34.127	12.615/0/0	4.5706	0.40285	-1.9895	762.19	294.51	0.24286	0.014985	0.98502	0.02997	0.42697	FALSE
HGLibA_49418	THUMPD2	5.7054/0/50.812	6.8809/0/0	2.9918	0.31175	-1.6056	1151.5	192.78	0.19303	0.014988	0.98501	0.029976	0.42697	FALSE
HGLibB_08963	CEBPZ	67.324/78.962/0	30.964/0/0	8.0082	0.57725	-2.5138	4308.4	516.02	0.32713	0.015003	0.985	0.030006	0.42735	FALSE
HGLibA_48845	TCP11L1	167.74/98.702/128.93	40.138/135.53/0	128.76	8.0721	-3.8382	1211.5	8296.6	1.325	0.015033	0.98497	0.030067	0.428	FALSE
HGLibA_00840	ADAMTS7	0/13.16/0	0/0/0	0.40994	0	-0.49563	81.453	26.415	0.079762	0.015046	0.98495	0.030091	0.428	FALSE
HGLibA_39494	PTPRCAP	0/13.16/0	0/0/0	0.40994	0	-0.49563	81.453	26.415	0.079762	0.015046	0.98495	0.030091	0.428	FALSE
HGLibA_43688	SF1	0/13.16/0	0/0/0	0.40994	0	-0.49563	81.453	26.415	0.079762	0.015046	0.98495	0.030091	0.428	FALSE
HGLibA_62608	hsa-mir-6087	0/13.16/0	0/0/0	0.40994	0	-0.49563	81.453	26.415	0.079762	0.015046	0.98495	0.030091	0.428	FALSE
HGLibB_29118	MGLL	0/13.16/0	0/0/0	0.40994	0	-0.49563	81.453	26.415	0.079762	0.015046	0.98495	0.030091	0.428	FALSE
HGLibB_42537	S100Z	0/13.16/0	0/0/0	0.40994	0	-0.49563	81.453	26.415	0.079762	0.015046	0.98495	0.030091	0.428	FALSE
HGLibA_51808	TSACC	0/13.16/0	0/0/0	0.40994	0	-0.49563	81.453	26.415	0.079762	0.015046	0.98495	0.030091	0.428	FALSE
HGLibB_16510	FAM227B	46.785/14.1/0	10.321/0/0	3.953	0.37059	-1.8535	976.57	254.71	0.22446	0.01507	0.98493	0.030139	0.42842	FALSE
HGLibA_10845	COX6A2	68.465/76.141/0	0/31.106/0	7.9556	0.57829	-2.5044	4187	512.62	0.32584	0.015096	0.9849	0.030193	0.42892	FALSE
HGLibA_38539	PRKCD	151.76/62.981/111.48	34.404/59.99/0	102.15	5.8187	-3.9191	2041.5	6581.9	1.1873	0.015114	0.98489	0.030229	0.42939	FALSE
HGLibA_31937	NINJ1	98.134/61.101/111.48	20.643/54.806/0	87.44	4.7472	-3.9438	693.07	5634.2	1.1017	0.015121	0.98488	0.030242	0.42953	FALSE
HGLibA_56118	ZNF506	0/0/40.194	1.1468/0/0	0.63861	0.13188	-0.53375	782.74	41.149	0.078994	0.015138	0.98486	0.030276	0.42975	FALSE
HGLibB_01616	ALG14	287.55/114.68/426.21	48.166/52.584/5.9529	241.35	24.775	-3.233	26177	15551	1.7367	0.015149	0.98485	0.030298	0.42991	FALSE
HGLibA_33820	OR2L2	21.681/60.161/0	0/14.812/0	4.982	0.43029	-2.0643	1674.2	321.02	0.25404	0.015172	0.98483	0.030344	0.43036	FALSE
HGLibA_22195	HSD17B6	0/18.8/44.745	0/11.85/0	4.2927	0.39255	-1.9263	932.63	276.6	0.2345	0.015178	0.98482	0.030357	0.43044	FALSE
HGLibB_52061	TTC37	96.992/96.822/96.315	75.689/22.219/0	96.709	5.4304	-3.9255	0.12426	6231.5	1.1563	0.015183	0.98482	0.030366	0.43052	FALSE
HGLibB_27814	MADCAM1	143.78/140.06/64.463	43.579/62.953/0	109.09	6.4062	-3.8939	2077	7029.6	1.2248	0.0152	0.9848	0.0304	0.43072	FALSE
HGLibA_31129	NAPB	23.963/0/34.886	0/11.85/0	4.2827	0.39255	-1.9236	671.09	275.96	0.23418	0.0152	0.9848	0.0304	0.43072	FALSE
HGLibA_25148	KLHL2	12.552/0/0	0/0/0	0.40202	0	-0.4875	73.972	25.904	0.078988	0.015203	0.9848	0.030406	0.43072	FALSE
HGLibB_19384	GMIP	12.552/0/0	0/0/0	0.40202	0	-0.4875	73.972	25.904	0.078988	0.015203	0.9848	0.030406	0.43072	FALSE
HGLibB_43534	SERPINF1	75.312/172.96/134.99	81.424/51.843/0	120.71	7.4094	-3.8553	2497.8	7777.8	1.2847	0.015206	0.98479	0.030411	0.43075	FALSE
HGLibA_49715	TM7SF2	73.03/0/72.805	32.111/0/0	8.0087	0.58549	-2.5064	4245.2	516.04	0.32677	0.015218	0.98478	0.030435	0.43099	FALSE
HGLibB_21816	HNRNPU	50.208/173.9/57.637	29.817/27.403/0	79.556	4.2494	-3.9398	5121.6	5126.2	1.0518	0.015223	0.98478	0.030445	0.43108	FALSE
HGLibB_56908	ZRANB2	82.158/0/79.63	0/36.29/0	8.5883	0.61394	-2.5707	5266.6	553.39	0.33898	0.015231	0.98477	0.030463	0.43123	FALSE
HGLibB_34689	OTOP1	14.834/0/21.235	0/7.4062/0	3.0702	0.32183	-1.6226	238.88	197.83	0.1954	0.015237	0.98476	0.030474	0.43123	FALSE
HGLibA_29259	MIER3	116.39/168.26/94.798	50.46/91.096/0	122.91	7.6255	-3.8445	1444.9	7919.6	1.2954	0.015239	0.98476	0.030478	0.43124	FALSE
HGLibB_32316	NOV	46.785/23.5/0	13.762/0/0	4.7008	0.41753	-2.0078	1073.3	302.9	0.24611	0.015264	0.98474	0.030528	0.43182	FALSE
HGLibA_21697	HMGB3	29.668/0/67.496	0/0/18.851	5.7599	0.47439	-2.1969	2208.1	371.14	0.27436	0.015267	0.98473	0.030535	0.43182	FALSE
HGLibB_34916	PACSIN2	130.08/119.38/91.006	36.698/85.171/0	112.22	6.6953	-3.879	410.21	7231.2	1.241	0.015269	0.98473	0.030537	0.43182	FALSE
HGLibA_24835	KIAA1984	38.797/22.56/99.348	2.2936/54.806/0	44.322	2.2599	-3.7973	1766	2855.9	0.78707	0.015278	0.98472	0.030555	0.43194	FALSE
HGLibB_14964	ELP5	102.7/92.122/63.704	0/37.031/27.78	84.471	4.5954	-3.9331	411.01	5443	1.0827	0.015293	0.98471	0.030586	0.4322	FALSE
HGLibB_13085	DHFR	0/12.22/0	0/0/0	0.39759	0	-0.48294	70.045	25.619	0.078552	0.015293	0.98471	0.030585	0.4322	FALSE
HGLibA_38497	PRKAB1	0/12.22/0	0/0/0	0.39759	0	-0.48294	70.045	25.619	0.078552	0.015293	0.98471	0.030585	0.4322	FALSE
HGLibA_59032	hsa-mir-346	0/33.841/9.1006	0/7.4062/0	3.049	0.32183	-1.615	497.02	196.47	0.19457	0.0153	0.9847	0.0306	0.4323	FALSE
HGLibA_45981	SNRPD3	46.785/0/34.886	0/17.034/0	5.374	0.45542	-2.1308	1307.3	346.28	0.26432	0.015314	0.98469	0.030628	0.43254	FALSE
HGLibB_51209	TRAIP	83.299/51.701/108.45	36.698/20.737/0	77.592	4.1484	-3.9322	827.54	4999.7	1.0387	0.015319	0.98468	0.030639	0.43259	FALSE
HGLibA_36394	PHGDH	70.747/64.861/57.637	0/11.85/33.733	64.19	3.3322	-3.9115	43.195	4136.1	0.94628	0.015324	0.98468	0.030647	0.43266	FALSE
HGLibA_41639	RNF220	55.913/29.141/78.114	5.7341/32.587/0	50.31	2.5717	-3.8446	626.29	3241.8	0.83845	0.015326	0.98467	0.030651	0.43266	FALSE
HGLibA_52439	TXNL4A	0/23.5/25.785	10.321/0/0	3.8384	0.37059	-1.8197	441.49	247.33	0.22051	0.015342	0.98466	0.030684	0.43308	FALSE
HGLibA_46970	SRGAP2	38.797/95.882/77.355	0/14.812/29.764	66.028	3.4446	-3.9146	880.54	4254.6	0.95947	0.015349	0.98465	0.030697	0.43318	FALSE
HGLibA_49141	TFB2M	109.54/130.66/42.47	0/19.256/54.568	84.725	4.6299	-3.9285	2255.9	5459.3	1.084	0.015352	0.98465	0.030704	0.43318	FALSE
HGLibB_22266	HSPA8	76.453/25.38/127.41	45.872/8.1468/0	62.788	3.2594	-3.9046	2880.9	4045.8	0.93589	0.015361	0.98464	0.030723	0.43337	FALSE
HGLibB_05766	C1orf141	22.822/7.5201/0	5.7341/0/0	2.4946	0.28784	-1.4402	222.34	160.74	0.17406	0.015403	0.9846	0.030806	0.43429	FALSE
HGLibB_40520	RBM4B	17.116/117.5/53.845	9.1745/17.775/0	47.701	2.4498	-3.8194	2922.7	3073.6	0.81621	0.015406	0.98459	0.030812	0.43432	FALSE
HGLibB_55817	ZNF37A	139.21/52.641/49.295	0/57.768/9.9214	71.23	3.7707	-3.9203	2724.2	4589.8	0.99575	0.015408	0.98459	0.030816	0.43432	FALSE
HGLibB_18175	FUT6	79.876/153.22/163.05	49.313/0/107.15	125.9	7.9925	-3.8189	2122.4	8112.8	1.3091	0.015419	0.98458	0.030838	0.43448	FALSE
HGLibA_41561	RNF167	27.386/68.621/81.147	20.643/11.109/0	53.439	2.7542	-3.8581	838.5	3443.4	0.86375	0.015428	0.98457	0.030856	0.43468	FALSE
HGLibA_51727	TRPC1	67.324/75.201/54.604	8.0277/53.325/0	65.145	3.4148	-3.9052	108.5	4197.6	0.95278	0.01545	0.98455	0.030901	0.43509	FALSE
HGLibA_58645	hsa-mir-3147	31.95/93.062/0	24.083/0/0	6.5838	0.52302	-2.316	4082.6	424.23	0.29426	0.015453	0.98455	0.030906	0.43509	FALSE
HGLibA_50166	TMEM199	39.938/91.182/60.671	30.964/0/10.914	60.46	3.1463	-3.8897	682.51	3895.8	0.91825	0.015458	0.98454	0.030916	0.43509	FALSE
HGLibA_61119	hsa-mir-4755	85.582/31.021/99.348	20.643/0/19.843	64.146	3.3585	-3.9018	1398	4133.3	0.94551	0.01546	0.98454	0.03092	0.43509	FALSE
HGLibA_43286	SELE	86.723/50.761/63.704	9.1745/0/47.623	65.458	3.4373	-3.9047	335.64	4217.8	0.95497	0.015469	0.98453	0.030938	0.43528	FALSE
HGLibA_13550	DNAJB6	26.245/21.62/150.16	25.23/5.1843/0	44.037	2.2743	-3.7818	6040.6	2837.6	0.784	0.015475	0.98452	0.030951	0.43532	FALSE
HGLibB_09351	CHCHD1	51.349/95.882/54.604	33.257/12.591/0	64.544	3.3852	-3.9018	627.49	4158.9	0.94835	0.015476	0.98452	0.030952	0.43532	FALSE
HGLibB_27443	LRRN4CL	38.797/53.581/157.74	17.202/30.365/0	68.975	3.6495	-3.9117	4513.8	4444.5	0.97988	0.015478	0.98452	0.030956	0.43532	FALSE
HGLibA_62183	hsa-mir-5585	25.104/38.541/0	0/13.331/0	4.5008	0.41212	-1.9618	801.73	290.01	0.24009	0.015478	0.98452	0.030955	0.43532	FALSE
HGLibA_37561	POLR1E	178.01/288.59/207.8	48.166/21.478/8.9293	220.19	21.007	-3.3292	3305.4	14188	1.6722	0.015482	0.98452	0.030964	0.43532	FALSE
HGLibA_03999	B3GNT7	106.12/32.901/37.919	2.2936/85.171/0	50.979	2.6329	-3.8388	1769	3284.9	0.84354	0.015484	0.98452	0.030967	0.43532	FALSE
HGLibA_38670	PROKR1	0/30.081/16.684	0/9.628/0	3.6001	0.35991	-1.7581	442.69	231.97	0.21274	0.01549	0.98451	0.030981	0.43546	FALSE
HGLibB_27483	LSM11	41.079/116.56/34.886	13.762/18.515/0	55.086	2.855	-3.8628	2191.8	3549.5	0.87669	0.015495	0.9845	0.03099	0.43549	FALSE
HGLibA_53312	USP25	39.938/25.38/35.644	6.8809/0/8.9293	33.061	1.7472	-3.6321	56.478	2130.3	0.67845	0.015518	0.98448	0.031036	0.43588	FALSE
HGLibB_46406	SPATA2L	11.411/0/0	0/0/0	0.38645	0	-0.47139	60.918	24.901	0.077443	0.015526	0.98447	0.031052	0.43595	FALSE
HGLibA_59637	hsa-mir-3944	11.411/0/0	0/0/0	0.38645	0	-0.47139	60.918	24.901	0.077443	0.015526	0.98447	0.031052	0.43595	FALSE
HGLibB_06389	C5orf47	11.411/0/0	0/0/0	0.38645	0	-0.47139	60.918	24.901	0.077443	0.015526	0.98447	0.031052	0.43595	FALSE
HGLibB_41169	RHOXF2B	46.785/29.141/189.6	0/6.6656/60.521	63.73	3.3486	-3.8958	8662.9	4106.5	0.94225	0.015528	0.98447	0.031056	0.43596	FALSE
HGLibB_06566	C7orf62	0/0/11.376	0/0/0	0.38595	0	-0.47088	60.537	24.869	0.077393	0.015536	0.98446	0.031073	0.43614	FALSE
HGLibA_21545	HIST2H3D	23.963/61.101/98.59	10.321/21.478/0	52.477	2.7226	-3.8445	1506.9	3381.4	0.85562	0.015543	0.98446	0.031086	0.43628	FALSE
HGLibB_44433	SLC18A1	34.233/38.541/40.953	12.615/0/6.945	37.805	1.9768	-3.7044	11.606	2436	0.72592	0.015546	0.98445	0.031093	0.43632	FALSE
HGLibA_29299	MIR205HG	47.926/14.1/45.503	1.1468/44.437/0	31.348	1.6708	-3.5983	386.34	2019.9	0.66032	0.015554	0.98445	0.031107	0.43647	FALSE
HGLibA_58027	hsa-mir-1908	0/11.28/0	0/0/0	0.3846	0	-0.46947	59.505	24.782	0.077258	0.015565	0.98443	0.031131	0.4367	FALSE
HGLibB_32786	NT5E	70.747/85.542/0	36.698/0/0	8.3658	0.6166	-2.5344	4958.8	539.06	0.33377	0.01557	0.98443	0.031139	0.43676	FALSE
HGLibB_03677	ATP5L	29.668/23.5/0	11.468/0/0	4.0263	0.38725	-1.8573	526.48	259.44	0.22593	0.015573	0.98443	0.031147	0.43682	FALSE
HGLibB_26201	LDLR	96.992/25.38/213.86	17.202/0/53.576	80.793	4.4285	-3.9133	10520	5206	1.0584	0.01558	0.98442	0.03116	0.43695	FALSE
HGLibB_48199	TAF8	33.092/16.92/0	10.321/0/0	3.7371	0.37059	-1.7892	524.73	240.8	0.21694	0.015594	0.98441	0.031188	0.43729	FALSE
HGLibB_00612	ACTG2	18.257/0/81.905	0/17.034/0	5.2197	0.45542	-2.0954	3039	336.33	0.25978	0.015598	0.9844	0.031196	0.4373	FALSE
HGLibA_31898	NHLRC2	189.42/78.021/49.295	30.964/0/44.646	89.996	5.0801	-3.9036	5842.6	5798.9	1.1151	0.015616	0.98438	0.031232	0.4377	FALSE
HGLibB_13841	DPM3	89.005/35.721/31.852	12.615/12.591/0	46.621	2.427	-3.7966	1066.7	3004	0.80632	0.015618	0.98438	0.031236	0.4377	FALSE
HGLibB_46884	SRD5A1	41.079/22.56/0	0/13.331/0	4.4357	0.41212	-1.9446	845.46	285.82	0.238	0.015618	0.98438	0.031236	0.4377	FALSE
HGLibB_37418	POFUT1	13.693/47.001/0	0/11.109/0	3.92	0.38216	-1.8317	983.42	252.59	0.2226	0.015621	0.98438	0.031242	0.43771	FALSE
HGLibA_41818	RPAP2	44.502/27.261/89.489	9.1745/18.515/0	47.717	2.4846	-3.8054	1086.9	3074.7	0.81573	0.015623	0.98438	0.031247	0.43771	FALSE
HGLibA_45648	SMC2	54.772/16.92/213.86	18.349/17.034/0	58.364	3.0619	-3.8694	12955	3760.7	0.90179	0.015632	0.98437	0.031263	0.43788	FALSE
HGLibB_28327	MARK2	44.502/47.941/75.838	30.964/8.1468/0	54.494	2.8479	-3.8502	299.18	3511.3	0.87156	0.015636	0.98436	0.031271	0.43795	FALSE
HGLibB_48828	TDO2	0/28.201/82.664	21.789/0/0	6.0642	0.50267	-2.233	3197.1	390.75	0.28135	0.015657	0.98434	0.031314	0.43843	FALSE
HGLibB_21705	HMGXB3	114.11/109.98/245.72	96.332/111.83/0	145.56	10.158	-3.7154	6143.1	9379.3	1.3981	0.01566	0.98434	0.03132	0.43843	FALSE
HGLibB_09729	CIT	9.1287/46.061/25.785	2.2936/10.369/0	22.158	1.2583	-3.3582	377.13	1427.8	0.55311	0.01566	0.98434	0.03132	0.43843	FALSE
HGLibA_45912	SNCAIP	73.03/45.121/94.04	29.817/17.034/0	67.675	3.6147	-3.8955	616.23	4360.7	0.97009	0.015673	0.98433	0.031345	0.43857	FALSE
HGLibA_39980	RAB7A	224.79/55.461/135.75	0/34.809/125.01	119.19	7.4871	-3.8239	7744	7680.1	1.2746	0.015678	0.98432	0.031356	0.43863	FALSE
HGLibB_33103	NXNL2	0/22.56/93.281	0/20.737/0	5.859	0.49285	-2.1999	3978	377.53	0.27618	0.015692	0.98431	0.031384	0.43891	FALSE
HGLibA_14172	DUSP27	140.35/46.061/64.463	45.872/15.553/0	74.705	4.0594	-3.9033	2617.6	4813.7	1.0182	0.015696	0.9843	0.031392	0.43897	FALSE
HGLibB_47014	SRSF2	22.822/0/91.006	20.643/0/0	5.8329	0.49195	-2.1953	3788.6	375.84	0.27549	0.015708	0.98429	0.031416	0.43916	FALSE
HGLibA_23050	IL1R2	132.37/77.081/49.295	0/23.7/37.701	79.534	4.3808	-3.9037	1855.8	5124.8	1.0498	0.015714	0.98429	0.031428	0.4392	FALSE
HGLibB_31632	NELFB	384.55/179.54/495.22	30.964/34.068/105.17	324.58	48.064	-2.7303	26876	20914	1.912	0.015727	0.98427	0.031454	0.43943	FALSE
HGLibA_44685	SLC25A25	30.809/56.401/0	0/0/18.851	5.4896	0.47439	-2.138	1631.6	353.73	0.26666	0.015741	0.98426	0.031481	0.43971	FALSE
HGLibA_31281	NCBP1	65.042/94.942/79.63	40.138/0/21.827	78.931	4.3519	-3.9007	224.87	5086	1.0458	0.015756	0.98424	0.031512	0.43983	FALSE
HGLibA_59038	hsa-mir-34b	0/41.361/15.926	11.468/0/0	3.9503	0.38725	-1.8353	779.28	254.54	0.22333	0.015756	0.98424	0.031511	0.43983	FALSE
HGLibB_38152	PPP4C	173.45/88.362/74.322	0/79.987/31.749	104.44	6.2419	-3.8639	2963.7	6729.8	1.197	0.015758	0.98424	0.031517	0.43984	FALSE
HGLibB_07105	CAMSAP2	14.834/10.34/0	5.7341/0/0	2.3982	0.28784	-1.3998	111.74	154.53	0.16977	0.015762	0.98424	0.031524	0.43984	FALSE
HGLibB_13506	DNAJB11	69.606/78.021/100.11	9.1745/107.39/0	81.617	4.5368	-3.8993	249.53	5259.1	1.0629	0.01577	0.98423	0.03154	0.43995	FALSE
HGLibA_34126	OR51Q1	65.042/54.521/53.845	0/28.144/10.914	57.584	3.045	-3.8563	39.491	3710.5	0.89535	0.015774	0.98423	0.031547	0.44001	FALSE
HGLibA_62897	hsa-mir-6511a-1	50.208/343.11/134.23	125/56.287/0	132.27	8.8019	-3.7652	25595	8523	1.3374	0.015779	0.98422	0.031557	0.4401	FALSE
HGLibA_51434	TRIM23	54.772/53.581/0	25.23/0/0	6.5536	0.53272	-2.3011	2289.8	422.29	0.29299	0.015788	0.98421	0.031575	0.4402	FALSE
HGLibA_54971	ZC3H18	50.208/133.48/131.2	25.23/71.84/0	95.814	5.5694	-3.8814	2375.5	6173.9	1.1485	0.015789	0.98421	0.031577	0.4402	FALSE
HGLibA_22988	IL17A	39.938/50.761/0	20.643/0/0	5.7833	0.49195	-2.1848	1611.5	372.65	0.2741	0.015794	0.98421	0.031588	0.44026	FALSE
HGLibA_01837	AMTN	84.441/80.842/163.05	75.689/0/32.741	103.64	6.1903	-3.8632	2209.1	6678.1	1.1925	0.015796	0.9842	0.031591	0.44026	FALSE
HGLibA_34507	OR8D1	26.245/141.94/148.64	10.321/98.502/0	82.159	4.5838	-3.8965	5560.3	5294	1.0662	0.015805	0.98419	0.031611	0.4404	FALSE
HGLibA_21808	HNRNPC	52.49/62.041/75.08	28.67/14.072/0	62.532	3.3418	-3.8711	129.27	4029.3	0.93247	0.015833	0.98417	0.031666	0.44094	FALSE
HGLibB_49975	TMEM165	298.97/480.35/233.58	59.634/62.953/28.772	322.51	47.631	-2.7339	16688	20781	1.9068	0.015837	0.98416	0.031673	0.44099	FALSE
HGLibA_58386	hsa-mir-28	115.25/53.581/68.255	21.789/34.068/0	74.982	4.1133	-3.8933	1062.4	4831.5	1.0196	0.015839	0.98416	0.031678	0.44099	FALSE
HGLibB_14932	ELOF1	287.55/319.61/235.1	32.111/31.106/41.67	278.52	34.656	-2.9707	1827.5	17947	1.8204	0.015844	0.98416	0.031687	0.44099	FALSE
HGLibB_37527	POLR2E	107.26/52.641/88.731	22.936/0/39.686	79.428	4.4086	-3.8944	789.42	5118	1.0486	0.015844	0.98416	0.031687	0.44099	FALSE
HGLibA_16587	FAM43A	47.926/62.041/29.577	10.321/14.072/0	44.475	2.3535	-3.7613	271.21	2865.8	0.78683	0.015867	0.98413	0.031734	0.44149	FALSE
HGLibA_50828	TNFSF9	0/10.34/0	0/0/0	0.37087	0	-0.45509	49.831	23.897	0.075866	0.015869	0.98413	0.031738	0.44149	FALSE
HGLibA_45987	SNRPF	0/10.34/0	0/0/0	0.37087	0	-0.45509	49.831	23.897	0.075866	0.015869	0.98413	0.031738	0.44149	FALSE
HGLibA_56936	ZNRD1	29.668/14.1/269.23	0/15.553/11.906	48.367	2.5587	-3.7941	25151	3116.5	0.82055	0.015878	0.98412	0.031756	0.44168	FALSE
HGLibB_23760	ITGB6	149.48/0/43.228	40.138/0/0	8.554	0.63827	-2.5439	10568	551.18	0.33717	0.015881	0.98412	0.031761	0.4417	FALSE
HGLibA_44694	SLC25A28	25.104/0/62.946	18.349/0/0	5.3164	0.46928	-2.104	1870.5	342.56	0.26189	0.015889	0.98411	0.031778	0.44179	FALSE
HGLibA_05833	C1orf226	10.27/0/0	0/0/0	0.36981	0	-0.45398	49.142	23.829	0.075758	0.015893	0.98411	0.031787	0.4418	FALSE
HGLibB_41776	RPF1	10.27/0/0	0/0/0	0.36981	0	-0.45398	49.142	23.829	0.075758	0.015893	0.98411	0.031787	0.4418	FALSE
HGLibA_47322	STAG1	127.8/99.642/238.89	95.185/115.54/0	144.9	10.229	-3.6998	5587.4	9336.9	1.3937	0.015901	0.9841	0.031803	0.44181	FALSE
HGLibA_19832	GPN3	0/25.38/129.68	0/27.403/0	6.8153	0.55032	-2.3337	7743.9	439.15	0.29896	0.015902	0.9841	0.031804	0.44181	FALSE
HGLibB_06496	C6orf58	178.01/23.5/87.214	19.496/0/32.741	71.497	3.9074	-3.8849	6947.8	4607	0.99581	0.015912	0.98409	0.031823	0.44181	FALSE
HGLibB_04268	BCCIP	0/24.44/31.094	12.615/0/0	4.146	0.40285	-1.8751	577.62	267.15	0.22901	0.015914	0.98409	0.031828	0.44181	FALSE
HGLibA_22736	IFRD1	71.889/34.781/45.503	0/46.659/3.9686	48.46	2.5695	-3.7925	372.38	3122.6	0.82124	0.015915	0.98408	0.03183	0.44181	FALSE
HGLibB_23071	IL24	104.98/115.62/172.91	0/55.546/112.11	128.04	8.4472	-3.7717	1349.7	8250.1	1.3166	0.01592	0.98408	0.03184	0.44181	FALSE
HGLibB_14374	ECHDC2	109.54/21.62/0	22.936/0/0	6.0985	0.51301	-2.2301	5489.6	392.96	0.28176	0.015923	0.98408	0.031846	0.44181	FALSE
HGLibA_02420	API5	0/15.04/69.771	14.909/0/0	4.6295	0.43143	-1.9755	2186.6	298.3	0.24306	0.015925	0.98408	0.031849	0.44181	FALSE
HGLibA_25824	KRTAP7-1	77.594/203.04/147.13	55.047/131.83/0	132.35	8.894	-3.7525	4107	8528.2	1.3369	0.015939	0.98406	0.031878	0.44202	FALSE
HGLibA_41806	RPA3	35.374/0/55.362	0/20.737/0	5.7161	0.49285	-2.1696	1688.5	368.32	0.27216	0.015941	0.98406	0.031882	0.44202	FALSE
HGLibA_42885	SCD	41.079/26.321/25.027	0/48.881/0.99214	30.024	1.6489	-3.5499	80.452	1934.6	0.64512	0.015942	0.98406	0.031884	0.44202	FALSE
HGLibB_14046	DTNB	192.84/147.58/136.51	121.56/136.27/0	157.21	11.738	-3.6345	895.51	10130	1.4453	0.015979	0.98402	0.031958	0.44268	FALSE
HGLibA_32316	NOP58	0/42.301/93.281	0/0/30.756	7.2431	0.57574	-2.3871	4342	466.71	0.30862	0.015991	0.98401	0.031981	0.44296	FALSE
HGLibA_13630	DNAJC5G	36.515/89.302/147.13	40.138/22.219/0	78.302	4.3782	-3.8822	3302	5045.5	1.0407	0.016014	0.98399	0.032028	0.4434	FALSE
HGLibA_40848	REPS1	0/29.141/72.046	0/0/21.827	5.853	0.50301	-2.1889	2479.1	377.14	0.27549	0.016027	0.98397	0.032055	0.44367	FALSE
HGLibA_28541	MC1R	122.1/74.261/51.57	24.083/36.29/0	77.623	4.348	-3.8779	1334	5001.7	1.0361	0.016073	0.98393	0.032146	0.44471	FALSE
HGLibB_37443	POLD1	100.42/33.841/89.489	17.202/31.106/0	67.26	3.6796	-3.8666	1355.1	4334	0.96579	0.016076	0.98392	0.032153	0.44471	FALSE
HGLibA_08554	CDC42	79.876/35.721/87.973	11.468/37.772/0	63.09	3.4253	-3.8563	825.01	4065.2	0.93578	0.016076	0.98392	0.032152	0.44471	FALSE
HGLibB_50673	TNFRSF10B	191.7/91.182/171.39	77.983/142.2/0	144.17	10.257	-3.6887	2904.2	9289.4	1.3894	0.016091	0.98391	0.032181	0.44497	FALSE
HGLibA_60581	hsa-mir-4530	31.95/0/58.396	0/20.737/0	5.6234	0.49285	-2.1495	1754.8	362.35	0.26953	0.016108	0.98389	0.032215	0.44532	FALSE
HGLibA_00671	ACTR6	368.57/461.55/255.58	83.717/44.437/53.576	351.63	58.416	-2.5692	10798	22658	1.948	0.016122	0.98388	0.032245	0.44556	FALSE
HGLibA_43369	SEMA6C	33.092/124.08/231.31	50.46/42.215/0	98.336	5.8809	-3.8516	11300	6336.4	1.1615	0.016122	0.98388	0.032244	0.44556	FALSE
HGLibB_28146	MAP3K4	140.35/148.52/99.348	64.221/98.502/0	127.47	8.4917	-3.7586	700.04	8213.4	1.3128	0.016124	0.98388	0.032248	0.44556	FALSE
HGLibB_51334	TRIL	15.975/0/86.456	0/17.775/0	5.0818	0.46331	-2.0553	3383.1	327.45	0.25523	0.016138	0.98386	0.032276	0.44589	FALSE
HGLibA_26022	LAPTM5	17.116/25.38/65.979	0/8.1468/6.945	30.619	1.6977	-3.551	730.06	1972.9	0.65112	0.01614	0.98386	0.032279	0.44589	FALSE
HGLibA_62715	hsa-mir-619	0/0/29.577	1.1468/0/0	0.56702	0.13188	-0.4693	421.11	36.536	0.071989	0.016142	0.98386	0.032284	0.44591	FALSE
HGLibB_47422	STK31	116.39/133.48/169.12	170.87/53.325/0	137.99	9.6027	-3.7125	727.94	8891.5	1.3616	0.016146	0.98385	0.032293	0.44598	FALSE
HGLibA_20553	GTF2H2D	78.735/1.88/122.1	0/8.1468/4.9607	26.619	1.51	-3.4599	6222.3	1715.2	0.60628	0.016178	0.98382	0.032355	0.44658	FALSE
HGLibA_12900	DEFB132	30.809/22.56/0	0/12.591/0	4.0221	0.40253	-1.8403	538.7	259.17	0.22484	0.0162	0.9838	0.032399	0.44709	FALSE
HGLibB_35883	PDPK1	0/43.241/25.785	16.055/0/0	4.723	0.44463	-1.9861	974.77	304.33	0.24525	0.016211	0.98379	0.032421	0.44729	FALSE
HGLibB_37837	PPFIBP1	0/9.4002/0	0/0/0	0.35629	0	-0.43967	41.023	22.958	0.07436	0.016211	0.98379	0.032421	0.44729	FALSE
HGLibA_54143	WDR61	207.68/165.44/283.64	20.643/25.181/16.866	213.6	20.621	-3.3111	3629.5	13764	1.6449	0.016223	0.98378	0.032446	0.44747	FALSE
HGLibA_10701	COPE	74.171/73.321/160.78	29.817/65.174/0	95.629	5.7017	-3.8499	2601.2	6161.9	1.1456	0.016223	0.98378	0.032446	0.44747	FALSE
HGLibA_30597	MVK	18.257/40.421/49.295	34.404/0/1.9843	33.145	1.8302	-3.5927	267.7	2135.7	0.6776	0.016228	0.98377	0.032457	0.44757	FALSE
HGLibB_07901	CCDC88A	62.76/15.98/24.268	12.615/0/3.9686	28.996	1.6295	-3.5119	665.88	1868.4	0.63312	0.016238	0.98376	0.032476	0.44773	FALSE
HGLibB_32974	NUP107	36.515/52.641/108.45	13.762/26.662/0	59.303	3.2351	-3.8318	1489.5	3821.2	0.90701	0.016249	0.98375	0.032499	0.44794	FALSE
HGLibB_36026	PET112	73.03/37.601/135.75	41.285/0/16.866	71.983	4.0255	-3.8602	2624.8	4638.3	0.99784	0.016275	0.98373	0.03255	0.44839	FALSE
HGLibA_36314	PHB2	14.834/3.7601/37.919	2.2936/3.7031/0	12.89	0.86916	-2.8935	356.81	830.54	0.4171	0.016292	0.98371	0.032583	0.44865	FALSE
HGLibB_50098	TMEM196	141.49/0/25.027	0/30.365/0	6.9859	0.57288	-2.344	9233.5	450.14	0.30227	0.016292	0.98371	0.032583	0.44865	FALSE
HGLibB_38001	PPP1R15B	42.22/34.781/0	0/0/18.851	5.185	0.47439	-2.0687	1137.2	334.1	0.25771	0.016318	0.98368	0.032636	0.44917	FALSE
HGLibA_59591	hsa-mir-3929	9.1287/0/0	0/0/0	0.3519	0	-0.43499	38.64	22.675	0.073901	0.016318	0.98368	0.032635	0.44917	FALSE
HGLibB_37952	PPOX	111.83/118.44/191.11	99.772/88.874/0	136.29	9.514	-3.7068	1961.3	8781.8	1.3528	0.016322	0.98368	0.032643	0.44919	FALSE
HGLibB_48425	TBC1D16	0/14.1/15.926	0/7.4062/0	2.7338	0.32183	-1.4981	155.35	176.16	0.18173	0.016323	0.98368	0.032646	0.44919	FALSE
HGLibB_25002	KLC4	66.183/72.381/0	0/36.29/0	7.7321	0.61394	-2.4357	3827.9	498.22	0.3189	0.016337	0.98366	0.032675	0.44949	FALSE
HGLibA_63820	hsa-mir-7113	296.68/126.9/360.99	36.698/39.253/11.906	238.66	25.806	-3.1604	15411	15378	1.7164	0.016341	0.98366	0.032682	0.44954	FALSE
HGLibB_19398	GMPPB	217.95/78.021/156.99	113.53/85.171/0	138.73	9.7955	-3.6942	5147.1	8939.2	1.3637	0.016347	0.98365	0.032694	0.44964	FALSE
HGLibA_46732	SPNS1	61.619/16.92/128.93	4.5872/0/51.591	51.267	2.7936	-3.7843	3658.8	3303.4	0.84338	0.016353	0.98365	0.032705	0.44965	FALSE
HGLibB_15407	ERC2	0/32.901/59.912	0/22.219/0	5.7289	0.50658	-2.1591	1853.5	369.15	0.27181	0.016363	0.98364	0.032727	0.44989	FALSE
HGLibA_30628	MXRA8	50.208/78.962/32.611	6.8809/33.328/0	50.571	2.7576	-3.7787	564.36	3258.6	0.8376	0.016369	0.98363	0.032738	0.44999	FALSE
HGLibB_56782	ZNF839	139.21/94.942/176.7	88.304/89.615/0	132.68	9.1565	-3.7183	1702.5	8549.3	1.3359	0.016376	0.98362	0.032751	0.45004	FALSE
HGLibA_49741	TMBIM4	0/19.74/33.369	0/12.591/0	3.9495	0.40253	-1.8192	565.23	254.49	0.22234	0.016381	0.98362	0.032762	0.45007	FALSE
HGLibB_31520	NDUFS7	55.913/163.56/139.54	0/40.734/81.356	108.48	6.8286	-3.8058	3381.1	6990	1.2158	0.01639	0.98361	0.032779	0.4502	FALSE
HGLibB_18716	GBP5	0/9.4002/69.771	12.615/0/0	3.949	0.40285	-1.8188	2188.9	254.45	0.2223	0.016395	0.9836	0.032791	0.45028	FALSE
HGLibB_22542	IER2	28.527/0/47.778	18.349/0/0	5.0559	0.46928	-2.0432	1200.8	325.78	0.25412	0.016399	0.9836	0.032799	0.45028	FALSE
HGLibA_28779	MED22	22.822/115.62/38.678	6.8809/26.662/0	46.754	2.5534	-3.7483	2690.4	3012.6	0.8053	0.0164	0.9836	0.0328	0.45028	FALSE
HGLibB_49867	TMEM131	60.478/67.681/18.96	5.7341/0/24.804	42.674	2.3401	-3.7088	752.36	2749.7	0.76917	0.016431	0.98357	0.032862	0.45099	FALSE
HGLibB_01683	ALOX15B	30.809/34.781/69.013	9.1745/0/14.882	41.98	2.3041	-3.7013	453.69	2705	0.76286	0.016434	0.98357	0.032869	0.45099	FALSE
HGLibA_52093	TTC27	199.69/186.12/265.43	123.86/0.74062/90.285	214.47	21.018	-3.2908	1809.6	13820	1.6456	0.016435	0.98356	0.03287	0.45099	FALSE
HGLibB_12938	DENND4C	41.079/25.38/0	16.055/0/0	4.6166	0.44463	-1.959	890.99	297.47	0.24189	0.016442	0.98356	0.032884	0.45112	FALSE
HGLibA_51019	TOR1AIP1	69.606/45.121/113	45.872/14.812/0	70.807	3.9927	-3.8462	1220.7	4562.5	0.98916	0.016459	0.98354	0.032918	0.45139	FALSE
HGLibB_36555	PIGY	158.61/54.521/210.83	127.3/43.696/0	122.18	8.1325	-3.7537	6881.7	7873	1.2854	0.016466	0.98353	0.032933	0.45145	FALSE
HGLibB_50328	TMEM39B	29.668/21.62/0	0/12.591/0	3.9137	0.40253	-1.8088	496.07	252.18	0.2211	0.016472	0.98353	0.032945	0.45145	FALSE
HGLibA_41101	RGS6	109.54/104.34/81.147	34.404/63.693/0	97.524	5.9379	-3.8279	229.59	6284	1.1553	0.016473	0.98353	0.032947	0.45145	FALSE
HGLibB_01866	ANAPC11	33.092/132.54/148.64	63.075/22.219/0	86.739	5.1048	-3.8452	4404.1	5589.1	1.0919	0.016477	0.98352	0.032953	0.45145	FALSE
HGLibB_46100	SOGA2	36.515/59.221/0	0/0/23.811	5.9111	0.52068	-2.1842	1906.7	380.89	0.2762	0.016488	0.98351	0.032976	0.45166	FALSE
HGLibA_32971	NUDT21	39.938/28.201/57.637	6.8809/17.775/0	40.194	2.2194	-3.6776	224.09	2589.9	0.74619	0.016499	0.9835	0.032997	0.45184	FALSE
HGLibB_20235	GRIA2	82.158/45.121/53.087	19.496/18.515/0	58.169	3.2165	-3.8107	385.78	3748.2	0.8976	0.0165	0.9835	0.033001	0.45184	FALSE
HGLibA_45921	SND1	61.619/47.001/194.15	10.321/113.31/0	82.554	4.8075	-3.8467	7077.5	5319.4	1.066	0.016503	0.9835	0.033007	0.45187	FALSE
HGLibA_43693	SF3A2	23.963/51.701/31.094	14.909/5.1843/0	33.778	1.8942	-3.5869	212.39	2176.5	0.68342	0.016519	0.98348	0.033038	0.45217	FALSE
HGLibB_08136	CCR1	15.975/11.28/0	6.8809/0/0	2.5349	0.31175	-1.4302	131.77	163.34	0.17395	0.016529	0.98347	0.033058	0.45227	FALSE
HGLibB_53239	USP22	422.2/478.47/332.93	51.606/202.93/52.584	406.67	81.984	-2.2965	5416.9	26204	2.0058	0.016541	0.98346	0.033082	0.45249	FALSE
HGLibA_53040	UNCX	26.245/91.182/91.764	9.1745/44.437/0	60.352	3.3568	-3.8158	1550.3	3888.8	0.91396	0.016551	0.98345	0.033102	0.45259	FALSE
HGLibA_23917	JAK2	104.98/66.741/160.78	0/67.396/42.662	104.06	6.5087	-3.8065	2305.3	6704.9	1.1913	0.016552	0.98345	0.033105	0.45259	FALSE
HGLibB_15198	ENY2	37.656/86.482/56.12	37.845/8.8874/0	56.755	3.1429	-3.8012	624.43	3657	0.88654	0.016552	0.98345	0.033105	0.45259	FALSE
HGLibA_22019	HPCAL1	51.349/0/36.402	0/22.219/0	5.6266	0.50658	-2.137	1534.7	362.56	0.2689	0.016552	0.98345	0.033104	0.45259	FALSE
HGLibA_44786	SLC26A11	28.527/64.861/173.67	30.964/19.997/0	68.523	3.867	-3.8364	6334.5	4415.3	0.97303	0.016555	0.98344	0.03311	0.45261	FALSE
HGLibB_39078	PSMC1	118.67/71.441/21.993	21.789/0/15.874	57.159	3.17	-3.8019	2612.3	3683.1	0.88961	0.01657	0.98343	0.033141	0.45298	FALSE
HGLibB_30953	NAA38	37.656/67.681/52.328	3.4404/70.359/0	51.094	2.8219	-3.7688	228.62	3292.3	0.8413	0.01658	0.98342	0.03316	0.45318	FALSE
HGLibA_64129	hsa-mir-8072	19.398/0/26.543	11.468/0/0	3.6313	0.38725	-1.7392	393.38	233.99	0.21208	0.016583	0.98342	0.033167	0.45323	FALSE
HGLibA_15774	EXOSC2	0/36.661/63.704	25.23/0/0	6.0671	0.53272	-2.205	2147.4	390.93	0.27991	0.016592	0.98341	0.033184	0.45336	FALSE
HGLibA_22997	IL17D	29.668/29.141/0	14.909/0/0	4.3318	0.43143	-1.8972	638.09	279.12	0.23346	0.016593	0.98341	0.033186	0.45336	FALSE
HGLibA_16081	FAM126A	0/8.4602/0	0/0/0	0.34072	0	-0.42301	33.079	21.954	0.072717	0.016599	0.9834	0.033199	0.45336	FALSE
HGLibA_13721	DNTTIP2	0/8.4602/0	0/0/0	0.34072	0	-0.42301	33.079	21.954	0.072717	0.016599	0.9834	0.033199	0.45336	FALSE
HGLibA_08724	CDK11A	0/8.4602/0	0/0/0	0.34072	0	-0.42301	33.079	21.954	0.072717	0.016599	0.9834	0.033199	0.45336	FALSE
HGLibB_14829	EIF5	0/8.4602/0	0/0/0	0.34072	0	-0.42301	33.079	21.954	0.072717	0.016599	0.9834	0.033199	0.45336	FALSE
HGLibB_28112	MAP2K6	143.78/98.702/141.06	142.2/45.918/0	126.03	8.5839	-3.7284	643.83	8120.9	1.3033	0.016608	0.98339	0.033216	0.45354	FALSE
HGLibB_23879	JAK1	29.668/27.261/116.03	12.615/14.072/0	45.463	2.5217	-3.7217	2780.5	2929.4	0.79338	0.016654	0.98335	0.033309	0.45439	FALSE
HGLibB_15563	ESR2	3.4233/30.081/105.42	0/0.74062/35.717	22.287	1.344	-3.3125	3663.5	1436.1	0.55265	0.016659	0.98334	0.033318	0.45447	FALSE
HGLibA_27648	LUZP6	79.876/80.842/128.17	26.377/74.062/0	93.89	5.7123	-3.8214	770.78	6049.9	1.1337	0.016667	0.98333	0.033333	0.45462	FALSE
HGLibB_37994	PPP1R14D	15.975/81.782/64.463	24.083/6.6656/0	43.865	2.4387	-3.7057	1319.9	2826.5	0.77921	0.016678	0.98332	0.033357	0.45484	FALSE
HGLibA_55591	ZNF213	108.4/17.86/179.74	18.349/37.772/0	70.404	4.0187	-3.8306	8079.3	4536.5	0.98562	0.016682	0.98332	0.033365	0.45486	FALSE
HGLibB_28567	MCM3	26.245/68.621/0	0/22.219/0	5.5571	0.50658	-2.1218	2218	358.08	0.2669	0.016683	0.98332	0.033366	0.45486	FALSE
HGLibA_57291	hsa-mir-122	127.8/118.44/94.798	0/63.693/64.489	112.79	7.3412	-3.77	290.5	7267.9	1.2369	0.016697	0.9833	0.033394	0.45503	FALSE
HGLibB_33703	OR2AG1	87.864/33.841/83.422	9.1745/51.843/0	62.842	3.5386	-3.8142	945.35	4049.3	0.93195	0.016697	0.9833	0.033393	0.45503	FALSE
HGLibB_28693	MED1	44.502/71.441/162.29	11.468/0/95.246	80.221	4.6957	-3.8339	4044.5	5169.1	1.0505	0.016702	0.9833	0.033405	0.45513	FALSE
HGLibA_14030	DSG4	37.656/103.4/63.704	13.762/0/34.725	62.84	3.5411	-3.8133	1140.1	4049.1	0.93189	0.016709	0.98329	0.033418	0.45519	FALSE
HGLibB_26832	LOC100507462	25.104/0/0	1.1468/0/0	0.53167	0.13188	-0.43638	302.18	34.258	0.068304	0.016711	0.98329	0.033423	0.45519	FALSE
HGLibA_04989	BUB1	171.16/49.821/149.4	0/32.587/107.15	108.43	6.9512	-3.7826	4524.8	6986.4	1.214	0.016712	0.98329	0.033423	0.45519	FALSE
HGLibB_07263	CASC1	133.51/97.762/53.845	42.432/37.772/0	88.916	5.341	-3.8258	1648.3	5729.3	1.1041	0.016716	0.98328	0.033432	0.45519	FALSE
HGLibA_26798	LOC100130880	41.079/184.24/0	0/50.362/0	9.0222	0.69614	-2.5629	15906	581.35	0.34532	0.016716	0.98328	0.033431	0.45519	FALSE
HGLibB_33287	OIP5	0/19.74/23.51	0/11.109/0	3.5048	0.38216	-1.7045	338.04	225.83	0.20779	0.016719	0.98328	0.033439	0.45523	FALSE
HGLibA_56236	ZNF559	15.975/70.501/23.51	55.047/0/0.99214	29.824	1.7194	-3.5027	943.15	1921.7	0.64111	0.01673	0.98327	0.03346	0.45547	FALSE
HGLibA_45699	SMG1	30.809/42.301/0	0/0/18.851	4.9795	0.47439	-2.0199	1042.4	320.86	0.25151	0.016738	0.98326	0.033475	0.45547	FALSE
HGLibB_44650	SLC25A30	58.195/99.642/99.348	65.368/19.256/0	83.211	4.9228	-3.8297	578.08	5361.8	1.0692	0.016743	0.98326	0.033487	0.45547	FALSE
HGLibA_12602	DDHD1	148.34/66.741/53.845	57.341/19.997/0	81.093	4.7691	-3.8308	2735.4	5225.3	1.0559	0.016743	0.98326	0.033485	0.45547	FALSE
HGLibA_01129	AFTPH	119.81/57.341/86.456	55.047/0/23.811	84.065	4.9899	-3.828	998.95	5416.8	1.0744	0.016759	0.98324	0.033518	0.45584	FALSE
HGLibA_39052	PSG6	68.465/12.22/77.355	0/21.478/5.9529	40.196	2.255	-3.6618	1481.3	2590	0.74551	0.016767	0.98323	0.033534	0.45595	FALSE
HGLibA_37689	POP4	7.9876/0/0	0/0/0	0.33245	0	-0.41409	29.411	21.422	0.07183	0.016817	0.98318	0.033634	0.457	FALSE
HGLibB_38267	PRAMEF4	108.4/97.762/31.852	14.909/45.918/0	69.646	4.0029	-3.8198	1860.5	4487.7	0.97989	0.016829	0.98317	0.033658	0.45723	FALSE
HGLibA_51252	TRAF3IP2	54.772/25.38/60.671	0/18.515/8.9293	43.863	2.4616	-3.696	371.56	2826.3	0.77876	0.016839	0.98316	0.033678	0.45744	FALSE
HGLibB_21157	HES4	63.901/18.8/0	18.349/0/0	4.8456	0.46928	-1.9922	1852.9	312.23	0.24767	0.016841	0.98316	0.033682	0.45744	FALSE
HGLibA_63553	hsa-mir-6845	19.398/0/49.295	0/16.294/0	4.4838	0.4473	-1.9218	1125.3	288.92	0.23748	0.016843	0.98316	0.033685	0.45744	FALSE
HGLibB_04004	B3GNT9	62.76/108.1/67.496	32.111/30.365/0	77.081	4.5125	-3.8242	629.64	4966.8	1.0297	0.016847	0.98315	0.033695	0.45751	FALSE
HGLibA_24027	KANK2	0/79.902/65.979	0/0/41.67	7.9858	0.64752	-2.4473	4299.5	514.57	0.3235	0.01687	0.98313	0.033739	0.45807	FALSE
HGLibA_05347	C14orf180	157.47/31.021/81.905	52.753/0/15.874	73.711	4.287	-3.8208	4452.6	4749.6	1.0074	0.016877	0.98312	0.033753	0.45811	FALSE
HGLibB_14792	EIF4B	23.963/0/0	1.1468/0/0	0.52199	0.13188	-0.42723	275.01	33.635	0.067265	0.016877	0.98312	0.033754	0.45811	FALSE
HGLibB_27372	LRRC7	54.772/30.081/0	0/0/21.827	5.3915	0.50301	-2.0883	1538.5	347.41	0.26228	0.016885	0.98311	0.033771	0.45829	FALSE
HGLibA_28831	MEF2BNB	164.32/93.062/78.872	61.928/54.065/0	106.45	6.8519	-3.7745	2144.2	6859.1	1.2026	0.016907	0.98309	0.033815	0.45882	FALSE
HGLibA_28838	MEF2C	71.889/93.062/59.912	0/20.737/40.678	73.732	4.2963	-3.8187	284.01	4751	1.0074	0.016909	0.98309	0.033818	0.45882	FALSE
HGLibA_50440	TMEM54	0/19.74/39.436	0/14.812/0	4.1807	0.43029	-1.8568	751.26	269.39	0.2285	0.016915	0.98309	0.033829	0.4589	FALSE
HGLibA_51869	TSHZ3	115.25/32.901/110.72	48.166/18.515/0	74.899	4.3789	-3.8187	2337.7	4826.2	1.0151	0.016918	0.98308	0.033837	0.45892	FALSE
HGLibB_31229	NCAPG2	31.95/40.421/22.752	6.8809/9.628/0	30.861	1.7937	-3.5115	79.171	1988.5	0.65183	0.016946	0.98305	0.033893	0.45963	FALSE
HGLibA_19744	GPATCH3	33.092/15.04/0	0/0/11.906	3.5902	0.39332	-1.72	507.16	231.34	0.21019	0.01696	0.98304	0.033921	0.45982	FALSE
HGLibA_16884	FARSA	30.809/41.361/60.671	9.1745/17.034/0	42.605	2.4141	-3.6749	233.53	2745.2	0.76706	0.016987	0.98301	0.033974	0.46031	FALSE
HGLibB_30812	MYO5B	61.619/100.58/244.96	48.166/97.021/0	114.95	7.6682	-3.7416	9976.5	7406.7	1.2465	0.016993	0.98301	0.033987	0.46031	FALSE
HGLibB_06340	C4orf51	148.34/64.861/96.315	0/35.55/67.466	97.5	6.122	-3.7898	1825.8	6282.5	1.1529	0.017014	0.98299	0.034027	0.46067	FALSE
HGLibA_32080	NLGN4Y	0/41.361/34.886	0/20.737/0	5.1542	0.49285	-2.0435	1110.7	332.12	0.25578	0.017019	0.98298	0.034038	0.46076	FALSE
HGLibB_13147	DHX15	31.95/6.5801/0	0/0/7.9371	2.6768	0.33155	-1.4653	439.68	172.48	0.17857	0.017028	0.98297	0.034055	0.4609	FALSE
HGLibB_06312	C4orf3	96.992/107.16/46.261	37.845/28.144/0	78.351	4.65	-3.8119	1103.7	5048.6	1.0373	0.01703	0.98297	0.034059	0.4609	FALSE
HGLibA_19624	GOLGA6L4	61.619/60.161/136.51	49.313/22.959/0	79.695	4.748	-3.8114	1968.1	5135.2	1.0459	0.017035	0.98296	0.03407	0.4609	FALSE
HGLibB_01002	ADNP2	0/10.34/47.02	0/0/11.906	3.5641	0.39332	-1.7118	973.51	229.66	0.20923	0.017035	0.98296	0.034071	0.4609	FALSE
HGLibB_28868	MESDC1	34.233/101.52/31.094	19.496/11.109/0	47.644	2.7006	-3.7164	1678.3	3070	0.81115	0.017036	0.98296	0.034071	0.4609	FALSE
HGLibA_27083	LPGAT1	31.95/19.74/1.5168	5.7341/0/0.99214	9.9928	0.7605	-2.6425	324.5	643.89	0.36383	0.017038	0.98296	0.034076	0.4609	FALSE
HGLibA_60489	hsa-mir-4511	0/7.5201/0	0/0/0	0.32396	0	-0.40486	25.997	20.874	0.070906	0.017049	0.98295	0.034098	0.46093	FALSE
HGLibB_33454	OR10G8	0/7.5201/0	0/0/0	0.32396	0	-0.40486	25.997	20.874	0.070906	0.017049	0.98295	0.034098	0.46093	FALSE
HGLibB_10691	COPE	0/7.5201/0	0/0/0	0.32396	0	-0.40486	25.997	20.874	0.070906	0.017049	0.98295	0.034098	0.46093	FALSE
HGLibB_04239	BCAP31	50.208/70.501/71.288	33.257/15.553/0	63.193	3.6376	-3.791	143.78	4071.9	0.93331	0.017068	0.98293	0.034137	0.46126	FALSE
HGLibA_58106	hsa-mir-197	28.527/28.201/147.88	5.7341/41.475/0	49.209	2.7947	-3.7259	5303	3170.8	0.82427	0.017068	0.98293	0.034136	0.46126	FALSE
HGLibA_14039	DSPP	1.1411/7.5201/104.66	0/0/62.505	9.869	0.75547	-2.6303	4533.2	635.91	0.3614	0.017071	0.98293	0.034141	0.46127	FALSE
HGLibB_52460	UBA52	184.86/22.56/35.644	66.515/4.4437/0	53.01	3.0165	-3.7492	9306.1	3415.8	0.85541	0.017076	0.98292	0.034152	0.46136	FALSE
HGLibA_05521	C17orf104	96.992/94.942/119.82	68.809/44.437/0	103.34	6.6453	-3.7705	191.29	6658.5	1.1849	0.017086	0.98291	0.034172	0.46157	FALSE
HGLibA_28872	MEIS1	108.4/67.681/126.65	47.019/51.843/0	97.586	6.1552	-3.7843	928.01	6288	1.153	0.017089	0.98291	0.034179	0.46157	FALSE
HGLibA_59194	hsa-mir-3660	84.441/49.821/53.845	0/12.591/36.709	60.961	3.5015	-3.7829	363.01	3928.1	0.9168	0.01709	0.98291	0.034181	0.46157	FALSE
HGLibB_04080	BAG4	158.61/127.84/88.731	100.92/59.99/0	121.63	8.3671	-3.7106	1244.3	7837.3	1.2794	0.017092	0.98291	0.034185	0.46157	FALSE
HGLibA_01934	ANK1	71.889/35.721/0	28.67/0/0	6.265	0.56016	-2.2193	2606.7	403.69	0.28394	0.017094	0.98291	0.034188	0.46157	FALSE
HGLibA_35591	PCGF1	0/22.56/0	1.1468/0/0	0.50966	0.13188	-0.4155	243.38	32.84	0.065923	0.017095	0.9829	0.03419	0.46157	FALSE
HGLibA_40292	RARS2	42.22/42.301/98.59	59.634/5.9249/0	56.056	3.2016	-3.7634	1094.9	3612	0.87944	0.017097	0.9829	0.034194	0.46157	FALSE
HGLibA_02900	ARID4A	20.54/51.701/0	0/0/17.859	4.6462	0.46419	-1.9472	1244.2	299.38	0.2417	0.017099	0.9829	0.034199	0.46157	FALSE
HGLibA_18393	GABRG2	110.69/47.941/73.563	60.781/0/13.89	73.089	4.2998	-3.8053	1023.1	4709.6	1.0024	0.017103	0.9829	0.034206	0.46157	FALSE
HGLibB_45599	SMC4	4.5644/49.821/6.0671	79.13/0/0	11.182	0.82533	-2.7385	781.46	720.52	0.38583	0.017109	0.98289	0.034217	0.46158	FALSE
HGLibB_04154	BARD1	53.631/132.54/100.87	44.726/39.253/0	89.511	5.5083	-3.7977	1634	5767.7	1.1061	0.01711	0.98289	0.03422	0.46158	FALSE
HGLibB_45626	SMCR7L	28.527/48.881/0	20.643/0/0	5.0952	0.49195	-2.0305	1246.1	328.31	0.25405	0.017111	0.98289	0.034223	0.46158	FALSE
HGLibB_01629	ALG5	42.22/59.221/79.63	18.349/22.219/0	58.396	3.3531	-3.7702	356.61	3762.8	0.89732	0.017146	0.98285	0.034291	0.4623	FALSE
HGLibB_45406	SLCO2A1	128.94/64.861/99.348	35.551/59.99/0	94.016	5.8835	-3.7869	1049.2	6058	1.1323	0.017157	0.98284	0.034315	0.46257	FALSE
HGLibB_26409	LHX1	27.386/61.101/0	22.936/0/0	5.4202	0.51301	-2.0852	1806.1	349.26	0.26258	0.017165	0.98284	0.034329	0.46266	FALSE
HGLibB_24889	KIF27	29.668/134.42/160.02	0/40.734/37.701	86.131	5.2643	-3.798	5489.8	5549.9	1.0855	0.017169	0.98283	0.034337	0.46272	FALSE
HGLibA_64192	hsa-mir-8087	86.723/45.121/55.362	27.523/16.294/0	60.062	3.4644	-3.7737	478.06	3870.1	0.90978	0.017187	0.98281	0.034374	0.463	FALSE
HGLibA_15619	ETFA	146.06/103.4/153.95	71.102/126.65/0	132.48	9.5637	-3.6594	745.48	8536.5	1.3304	0.017199	0.9828	0.034397	0.46318	FALSE
HGLibA_07838	CCDC67	33.092/25.38/224.48	10.321/0/37.701	57.383	3.3026	-3.7623	14768	3697.5	0.88937	0.017207	0.98279	0.034415	0.4633	FALSE
[truncated: 117,813 more rows]
